# Supplementary material for: The conjugation-resistant bile acid norUDCA cures liver fibrosis but impairs systemic energy metabolism
Source: Research Square preprint supplement (doi:10.21203/rs.3.rs-8280795/v1), 2025-12-10
Supplement: Supplementary file 1 [file 348bae270881eb8f5f74d456.xlsx]

## Sheet: BAT_control vs norUDCA
gene_id	iBDiet_4	iBDiet_8	iBDiet_10	iBDiet_12	iBMock_1	iBMock_3	iBMock_5	iBMock_9	Control	norUDCA	log2FoldChange	padj	gene_name	gene_description
ENSMUSG00000040016	142.045	99.0733	108.848	137.229	1223.6	1082.52	1230.58	1547.16	1270.97	121.799	-3.38427	2.52935e-86	Ptger3	prostaglandin E receptor 3 (subtype EP3) [Source:MGI Symbol;Acc:MGI:97795]
ENSMUSG00000031489	323.978	307.501	340.653	532.155	7692.52	5148.51	5198.83	7381.56	6355.36	376.072	-4.07965	2.59675e-81	Adrb3	adrenergic receptor, beta 3 [Source:MGI Symbol;Acc:MGI:87939]
ENSMUSG00000028339	114.803	140.198	119.934	125.706	2145.48	1488.6	1087.74	1892.36	1653.55	125.16	-3.72322	3.20504e-67	Col15a1	collagen, type XV, alpha 1 [Source:MGI Symbol;Acc:MGI:88449]
ENSMUSG00000025533	3404.2	4033.97	4876.99	2504.69	343.499	390.419	377.231	380.283	372.858	3704.96	3.31306	3.72856e-65	Asl	argininosuccinate lyase [Source:MGI Symbol;Acc:MGI:88084]
ENSMUSG00000020427	3541.38	2960.98	3608.1	3607.76	558.882	347.619	553.944	537.602	499.512	3429.56	2.77879	9.14702e-63	Igfbp3	insulin-like growth factor binding protein 3 [Source:MGI Symbol;Acc:MGI:96438]
ENSMUSG00000061740	6452.32	8093.17	7601.21	7546.55	2173.33	2095.11	2339.38	2367.71	2243.88	7423.31	1.72612	2.93256e-61	Cyp2d22	cytochrome P450, family 2, subfamily d, polypeptide 22 [Source:MGI Symbol;Acc:MGI:1929474]
ENSMUSG00000049971	786.109	918.765	767.982	678.812	142.042	89.7754	93.3922	100.73	106.485	787.917	2.88496	4.40625e-57	Glt1d1	glycosyltransferase 1 domain containing 1 [Source:MGI Symbol;Acc:MGI:2442755]
ENSMUSG00000068220	3678.56	3069.4	3422.66	3858.13	12350.2	11966.2	10453.5	11563.5	11583.4	3507.19	-1.72376	1.0174e-56	Lgals1	lectin, galactose binding, soluble 1 [Source:MGI Symbol;Acc:MGI:96777]
ENSMUSG00000048756	1664.64	1447.78	1596.44	1362.86	466.045	445.745	471.539	418.764	450.523	1517.93	1.75145	3.09952e-56	Foxo3	forkhead box O3 [Source:MGI Symbol;Acc:MGI:1890081]
ENSMUSG00000112129	2316.49	2772.18	2670.8	2746.68	477.185	515.687	528.307	321.43	460.652	2626.54	2.50989	3.41423e-52	Pbld1	phenazine biosynthesis-like protein domain containing 1 [Source:MGI Symbol;Acc:MGI:1915621]
ENSMUSG00000040618	2947.91	3492.8	2506.52	2781.24	794.69	747.432	800.243	600.983	735.837	2932.12	1.99369	1.58171e-41	Pck2	phosphoenolpyruvate carboxykinase 2 (mitochondrial) [Source:MGI Symbol;Acc:MGI:1860456]
ENSMUSG00000020680	2902.18	2892.75	3059.83	3014.85	1501.18	1536.62	1468.64	1448.7	1488.78	2967.4	0.994908	1.97679e-41	Taf15	TATA-box binding protein associated factor 15 [Source:MGI Symbol;Acc:MGI:1917689]
ENSMUSG00000046794	856.159	1028.12	985.678	1446.67	7205.13	6557.78	5893.78	9700.61	7339.32	1079.16	-2.76588	1.97679e-41	Ppp1r3b	protein phosphatase 1, regulatory subunit 3B [Source:MGI Symbol;Acc:MGI:2177268]
ENSMUSG00000045193	2880.78	2242.23	2370.46	2260.61	802.117	812.154	860.673	758.302	808.312	2438.52	1.59263	9.8322e-41	Cirbp	cold inducible RNA binding protein [Source:MGI Symbol;Acc:MGI:893588]
ENSMUSG00000026489	71347.2	75009.7	68229.5	61395.8	27987.8	26730.1	30328.7	28340.1	28346.7	68995.6	1.28332	5.69793e-40	Coq8a	coenzyme Q8A [Source:MGI Symbol;Acc:MGI:1914676]
ENSMUSG00000025355	299.656	312.174	348.716	372.928	1039.78	904.017	987.943	975.607	976.837	333.368	-1.55235	5.69793e-40	Mmp19	matrix metallopeptidase 19 [Source:MGI Symbol;Acc:MGI:1927899]
ENSMUSG00000027597	2230.88	2268.4	2687.94	2223.95	552.384	551.179	750.8	490.067	586.107	2352.79	2.0039	3.60323e-38	Ahcy	S-adenosylhomocysteine hydrolase [Source:MGI Symbol;Acc:MGI:87968]
ENSMUSG00000029675	1900.09	1933.8	2118.5	2104.53	848.536	953.081	893.635	862.427	889.42	2014.23	1.17924	1.15915e-36	Eln	elastin [Source:MGI Symbol;Acc:MGI:95317]
ENSMUSG00000046275	592.501	923.438	640.993	1111.45	4809.92	5662.11	4480.08	6112.82	5266.23	817.095	-2.68828	1.2457e-36	Tusc5	tumor suppressor candidate 5 [Source:MGI Symbol;Acc:MGI:3029307]
ENSMUSG00000073700	2778.62	2606.75	2596.22	2099.29	868.032	872.7	721.501	748.116	802.587	2520.22	1.65088	1.60517e-36	Klhl21	kelch-like 21 [Source:MGI Symbol;Acc:MGI:1919288]
ENSMUSG00000024990	512.722	450.503	532.145	480.825	2816.69	2745.46	2194.72	4433.24	3047.53	494.049	-2.62472	1.74362e-36	Rbp4	retinol binding protein 4, plasma [Source:MGI Symbol;Acc:MGI:97879]
ENSMUSG00000021024	9966.47	8410.01	8904.36	9311.67	3933.53	4229.88	3669.76	4110.68	3985.96	9148.13	1.19869	8.05312e-36	Psma6	proteasome (prosome, macropain) subunit, alpha type 6 [Source:MGI Symbol;Acc:MGI:1347006]
ENSMUSG00000031770	14469.1	12487.9	12675.7	7887	2242.96	2242.3	2328.4	1609.41	2105.77	11879.9	2.49593	2.19688e-35	Herpud1	homocysteine-inducible, endoplasmic reticulum stress-inducible, ubiquitin-like domain member 1 [Source:MGI Symbol;Acc:MGI:1927406]
ENSMUSG00000026043	754.003	1042.14	635.954	644.243	12191.4	8516.14	4383.94	8666.15	8439.42	769.085	-3.45571	2.79421e-35	Col3a1	collagen, type III, alpha 1 [Source:MGI Symbol;Acc:MGI:88453]
ENSMUSG00000073758	710.223	722.487	609.75	725.952	183.818	229.658	178.544	151.66	185.92	692.103	1.89559	3.40108e-35	Sh3d21	SH3 domain containing 21 [Source:MGI Symbol;Acc:MGI:1914188]
ENSMUSG00000025340	1896.2	2027.26	2415.82	2096.15	625.725	662.876	759.041	783.202	707.711	2108.86	1.57561	5.37198e-35	Rabgef1	RAB guanine nucleotide exchange factor (GEF) 1 [Source:MGI Symbol;Acc:MGI:1929459]
ENSMUSG00000061742	318.141	336.475	289.253	237.794	12.9973	22.9658	19.2278	1.13179	14.0807	295.416	4.37174	1.36294e-34	Slc22a12	solute carrier family 22 (organic anion/cation transporter), member 12 [Source:MGI Symbol;Acc:MGI:1195269]
ENSMUSG00000045917	3259.24	2693.67	2478.3	2085.67	750.128	754.74	636.349	688.131	707.337	2629.22	1.89437	2.72688e-34	Tmem268	transmembrane protein 268 [Source:MGI Symbol;Acc:MGI:1913920]
ENSMUSG00000064215	17027.8	17522	16550.9	17225.9	29010.8	28501.6	28245.6	29427.8	28796.5	17081.7	-0.753422	9.42332e-34	Ifi27	interferon, alpha-inducible protein 27 [Source:MGI Symbol;Acc:MGI:1277180]
ENSMUSG00000036528	1357.21	1239.35	1141.89	833.85	251.59	288.116	201.434	234.281	243.855	1143.08	2.22979	3.50821e-33	Ppfibp2	PTPRF interacting protein, binding protein 2 (liprin beta 2) [Source:MGI Symbol;Acc:MGI:894649]
ENSMUSG00000020472	778.326	752.396	673.244	784.615	290.582	307.95	287.501	308.98	298.753	747.145	1.32356	5.01309e-33	Zkscan17	zinc finger with KRAB and SCAN domains 17 [Source:MGI Symbol;Acc:MGI:2679270]
ENSMUSG00000018593	5300.4	6531.36	6369.61	6331.39	20464.2	18443.6	15628.5	22160.5	19174.2	6133.19	-1.64443	8.20392e-33	Sparc	secreted acidic cysteine rich glycoprotein [Source:MGI Symbol;Acc:MGI:98373]
ENSMUSG00000029370	1049.77	1066.44	802.249	766.806	245.091	271.414	269.189	264.84	262.634	921.316	1.81142	1.14812e-31	Rassf6	Ras association (RalGDS/AF-6) domain family member 6 [Source:MGI Symbol;Acc:MGI:1920496]
ENSMUSG00000020432	6176.02	7588.45	6955.18	6524.14	2530.75	2947.97	2944.6	2948.32	2842.91	6810.95	1.26066	1.74043e-31	Tcn2	transcobalamin 2 [Source:MGI Symbol;Acc:MGI:98534]
ENSMUSG00000020034	2287.31	1981.47	2618.4	1831.12	752.913	619.033	659.239	604.378	658.891	2179.57	1.72529	2.78018e-31	Tcp11l2	t-complex 11 (mouse) like 2 [Source:MGI Symbol;Acc:MGI:2444679]
ENSMUSG00000031026	406.675	415.921	243.9	326.836	44.5621	51.1511	25.6371	48.6672	42.5043	348.333	3.04224	4.61068e-31	Trim66	tripartite motif-containing 66 [Source:MGI Symbol;Acc:MGI:2152406]
ENSMUSG00000026626	11134	10022.3	11447.2	11167.9	24880.5	27231.2	23272.1	29660.9	26261.2	10942.8	-1.26292	5.79025e-31	Ppp2r5a	protein phosphatase 2, regulatory subunit B', alpha [Source:MGI Symbol;Acc:MGI:2388479]
ENSMUSG00000078429	5363.64	5435.95	5353.7	4967.48	2710.86	2951.11	2907.06	2812.51	2845.38	5280.19	0.892073	1.48501e-30	Ctdsp2	CTD (carboxy-terminal domain, RNA polymerase II, polypeptide A) small phosphatase 2 [Source:MGI Symbol;Acc:MGI:1098748]
ENSMUSG00000030161	13699.5	13531	13155.5	10765.7	4831.27	4796.72	5652.06	4899.54	5044.9	12787.9	1.34184	3.38312e-30	Gabarapl1	gamma-aminobutyric acid (GABA) A receptor-associated protein-like 1 [Source:MGI Symbol;Acc:MGI:1914980]
ENSMUSG00000025202	137.18	192.539	155.209	174.941	25.9945	16.7024	10.9873	13.5815	16.8164	164.967	3.28724	8.12416e-30	Scd3	stearoyl-coenzyme A desaturase 3 [Source:MGI Symbol;Acc:MGI:1353437]
ENSMUSG00000028701	191.663	276.658	283.206	282.838	812.329	1113.84	1026.4	1122.74	1018.83	258.591	-1.9781	1.0409e-29	Lurap1	leucine rich adaptor protein 1 [Source:MGI Symbol;Acc:MGI:1915325]
ENSMUSG00000022548	1038.09	886.986	1142.9	695.573	168.964	146.146	179.46	87.1482	145.43	940.889	2.68987	1.44391e-29	Apod	apolipoprotein D [Source:MGI Symbol;Acc:MGI:88056]
ENSMUSG00000022947	435.863	897.268	496.87	581.39	95.6227	94.9949	78.7424	93.9389	90.8248	602.848	2.73197	2.2617e-29	Cbr3	carbonyl reductase 3 [Source:MGI Symbol;Acc:MGI:1309992]
ENSMUSG00000039530	1369.85	1038.4	1003.82	1204.68	250.662	370.584	236.227	287.476	286.237	1154.19	2.01315	5.16065e-29	Tusc3	tumor suppressor candidate 3 [Source:MGI Symbol;Acc:MGI:1933134]
ENSMUSG00000025792	362.895	327.129	304.371	321.598	1072.27	1080.44	897.298	1372.87	1105.72	328.998	-1.74785	5.16065e-29	Slc25a10	solute carrier family 25 (mitochondrial carrier, dicarboxylate transporter), member 10 [Source:MGI Symbol;Acc:MGI:1353497]
ENSMUSG00000031980	809.459	1426.28	998.78	968.984	67.7715	62.634	131.848	30.5584	73.2029	1050.88	3.83716	5.24204e-29	Agt	angiotensinogen (serpin peptidase inhibitor, clade A, member 8) [Source:MGI Symbol;Acc:MGI:87963]
ENSMUSG00000079017	677.144	570.139	791.163	411.687	5844.13	5303.01	4380.28	2712.91	4560.08	612.533	-2.89617	5.79836e-29	Ifi27l2a	interferon, alpha-inducible protein 27 like 2A [Source:MGI Symbol;Acc:MGI:1924183]
ENSMUSG00000040713	3302.05	3689.08	3285.59	3635	1783.41	1865.45	1810.16	1780.31	1809.83	3477.93	0.942395	8.85033e-29	Creg1	cellular repressor of E1A-stimulated genes 1 [Source:MGI Symbol;Acc:MGI:1344382]
ENSMUSG00000020534	1978.89	2016.98	2223.32	1854.16	715.778	892.534	786.509	881.668	819.122	2018.34	1.30199	1.36821e-28	Shmt1	serine hydroxymethyltransferase 1 (soluble) [Source:MGI Symbol;Acc:MGI:98299]
ENSMUSG00000020836	1826.15	1913.24	2312.01	1700.17	492.968	590.847	589.653	713.03	596.625	1937.89	1.7007	2.65033e-28	Coro6	coronin 6 [Source:MGI Symbol;Acc:MGI:2183448]
ENSMUSG00000020547	2557.77	1926.32	2228.36	1627.89	542.172	627.384	662.902	621.355	613.453	2085.09	1.76527	5.26048e-28	Bzw2	basic leucine zipper and W2 domains 2 [Source:MGI Symbol;Acc:MGI:1914162]
ENSMUSG00000022665	512.722	391.62	398.101	419.02	2503.83	1764.19	1697.54	1423.8	1847.34	430.366	-2.1021	5.26048e-28	Ccdc80	coiled-coil domain containing 80 [Source:MGI Symbol;Acc:MGI:1915146]
ENSMUSG00000049241	118.695	88.7921	82.6437	114.183	623.869	1026.15	454.142	788.861	723.256	101.078	-2.83883	6.04729e-28	Hcar1	hydrocarboxylic acid receptor 1 [Source:MGI Symbol;Acc:MGI:2441671]
ENSMUSG00000048489	20875.7	10014.8	12365.3	10035.5	1525.32	741.169	1867.84	1052.57	1296.73	13322.8	3.36065	1.03705e-27	Depp1	DEPP1 autophagy regulator [Source:MGI Symbol;Acc:MGI:1918730]
ENSMUSG00000046027	2118.02	1913.24	1753.66	2013.39	886.599	686.886	777.353	711.899	765.684	1949.58	1.34744	1.03705e-27	Stard5	StAR-related lipid transfer (START) domain containing 5 [Source:MGI Symbol;Acc:MGI:2156765]
ENSMUSG00000019853	25.2956	20.5624	19.1492	37.7118	168.964	147.19	185.869	203.723	176.437	25.6797	-2.7862	3.12027e-27	Hebp2	heme binding protein 2 [Source:MGI Symbol;Acc:MGI:1860084]
ENSMUSG00000033416	9808.85	8059.52	7494.38	8133.18	3675.44	3329	2952.84	3062.64	3254.98	8373.98	1.36321	3.94483e-27	Gucd1	guanylyl cyclase domain containing 1 [Source:MGI Symbol;Acc:MGI:1916028]
ENSMUSG00000003948	1987.65	2102.97	1611.55	2263.76	5762.43	6532.73	6330.53	8634.46	6815.04	1991.48	-1.77478	5.7247e-27	Mmd	monocyte to macrophage differentiation-associated [Source:MGI Symbol;Acc:MGI:1914718]
ENSMUSG00000022299	6043.7	6135.07	5800.18	4942.34	1677.58	1651.45	1573.02	969.948	1468	5730.32	1.96434	1.08788e-26	Slc25a32	solute carrier family 25, member 32 [Source:MGI Symbol;Acc:MGI:1917156]
ENSMUSG00000039395	395	519.667	580.522	549.964	79.8403	131.531	130.932	107.52	112.456	511.288	2.18527	1.36815e-26	Mreg	melanoregulin [Source:MGI Symbol;Acc:MGI:2151839]
ENSMUSG00000029669	2118.99	2040.35	1747.61	2042.72	3942.81	4109.83	3898.67	4202.35	4038.42	1987.42	-1.0227	1.89345e-26	Tspan12	tetraspanin 12 [Source:MGI Symbol;Acc:MGI:1889818]
ENSMUSG00000053411	1508.01	1836.59	1797	1562.94	586.734	727.598	643.674	534.207	623.053	1676.14	1.42746	1.67113e-25	Cbx7	chromobox 7 [Source:MGI Symbol;Acc:MGI:1196439]
ENSMUSG00000002058	116.749	121.505	110.864	101.612	346.284	406.077	319.548	449.322	380.308	112.682	-1.75165	5.4784e-25	Unc119	unc-119 lipid binding chaperone [Source:MGI Symbol;Acc:MGI:1328357]
ENSMUSG00000033444	2130.67	2008.57	1994.54	1843.69	1037.92	1095.05	990.69	1022.01	1036.42	1994.37	0.944672	8.53291e-25	Specc1l	sperm antigen with calponin homology and coiled-coil domains 1-like [Source:MGI Symbol;Acc:MGI:1921642]
ENSMUSG00000027533	690.764	510.321	615.797	775.187	3074.78	2534.59	1879.75	3112.43	2650.39	648.017	-2.0323	9.68782e-25	Fabp5	fatty acid binding protein 5, epidermal [Source:MGI Symbol;Acc:MGI:101790]
ENSMUSG00000055254	2778.62	2760.97	2699.02	2473.26	5042.94	4853.09	4582.63	4896.14	4843.7	2677.97	-0.854786	1.44883e-24	Ntrk2	neurotrophic tyrosine kinase, receptor, type 2 [Source:MGI Symbol;Acc:MGI:97384]
ENSMUSG00000022853	47266.8	35685.1	37658.3	81856.6	6221.05	8701.95	7584	9341.83	7962.21	50616.7	2.6684	1.69224e-24	Ehhadh	enoyl-Coenzyme A, hydratase/3-hydroxyacyl Coenzyme A dehydrogenase [Source:MGI Symbol;Acc:MGI:1277964]
ENSMUSG00000019326	2043.11	2332.9	2296.89	2682.77	5038.3	6223.73	5954.21	6691.17	5976.85	2338.92	-1.35353	2.51984e-24	Aoc3	amine oxidase, copper containing 3 [Source:MGI Symbol;Acc:MGI:1306797]
ENSMUSG00000036206	1195.7	1899.22	1366.65	894.607	258.089	243.229	195.025	305.584	250.482	1339.04	2.4199	2.84925e-24	Sh3bp4	SH3-domain binding protein 4 [Source:MGI Symbol;Acc:MGI:2138297]
ENSMUSG00000067279	394.028	365.45	418.258	214.748	2450.91	1400.91	3223.86	2291.88	2341.89	348.121	-2.74978	3.0423e-24	Ppp1r3c	protein phosphatase 1, regulatory subunit 3C [Source:MGI Symbol;Acc:MGI:1858229]
ENSMUSG00000058297	310.358	343.953	402.132	423.21	107.692	113.785	128.185	105.257	113.73	369.913	1.69891	3.27009e-24	Spock2	sparc/osteonectin, cwcv and kazal-like domains proteoglycan 2 [Source:MGI Symbol;Acc:MGI:1891351]
ENSMUSG00000067786	61.2932	45.798	26.2041	33.5216	500.395	625.296	848.77	247.863	555.581	41.7042	-3.73427	4.31129e-24	Nnat	neuronatin [Source:MGI Symbol;Acc:MGI:104716]
ENSMUSG00000048787	625.58	681.363	584.553	603.389	1646.01	2184.88	1713.11	1472.46	1754.12	623.721	-1.49157	5.01678e-24	Dcun1d3	DCN1, defective in cullin neddylation 1, domain containing 3 (S. cerevisiae) [Source:MGI Symbol;Acc:MGI:2679003]
ENSMUSG00000020848	91.4533	156.087	145.13	137.229	16.7108	10.439	18.3122	10.1861	13.912	132.475	3.23322	9.20308e-24	Doc2b	double C2, beta [Source:MGI Symbol;Acc:MGI:1100497]
ENSMUSG00000029135	2028.51	3483.45	4440.59	2248.04	567.238	506.291	312.223	457.245	460.749	3050.15	2.72701	1.08229e-23	Fosl2	fos-like antigen 2 [Source:MGI Symbol;Acc:MGI:102858]
ENSMUSG00000073460	89.5075	98.1386	74.5809	93.2319	298.009	345.531	509.079	390.469	385.772	88.8647	-2.11787	1.08994e-23	Pnldc1	poly(A)-specific ribonuclease (PARN)-like domain containing 1 [Source:MGI Symbol;Acc:MGI:2685159]
ENSMUSG00000051314	20.4311	16.8238	16.1256	29.3314	221.882	149.278	156.569	125.629	163.34	20.678	-2.98934	1.14495e-23	Ffar2	free fatty acid receptor 2 [Source:MGI Symbol;Acc:MGI:2441731]
ENSMUSG00000023074	1533.3	1516.01	1495.65	1596.47	764.982	881.052	833.205	782.07	815.327	1535.36	0.913087	4.09482e-23	Mospd1	motile sperm domain containing 1 [Source:MGI Symbol;Acc:MGI:1917630]
ENSMUSG00000000628	3169.73	3307.74	4264.22	3157.31	9825	10906.7	10535	15334.7	11650.3	3474.75	-1.74534	4.92465e-23	Hk2	hexokinase 2 [Source:MGI Symbol;Acc:MGI:1315197]
ENSMUSG00000027712	4068.7	4300.34	4101.95	4612.36	8633.9	7545.31	8744.07	9234.31	8539.4	4270.84	-0.999643	5.60449e-23	Anxa5	annexin A5 [Source:MGI Symbol;Acc:MGI:106008]
ENSMUSG00000070476	210.148	179.454	180.405	222.081	526.389	568.925	458.721	577.215	532.813	198.022	-1.42777	6.21245e-23	Fam217b	family with sequence similarity 217, member B [Source:MGI Symbol;Acc:MGI:1918782]
ENSMUSG00000047181	636.282	550.511	704.487	498.634	134.615	176.419	192.278	200.328	175.91	597.478	1.76597	1.07727e-22	Samd14	sterile alpha motif domain containing 14 [Source:MGI Symbol;Acc:MGI:2384945]
ENSMUSG00000006800	668.387	758.004	741.778	703.953	1352.64	1553.32	1500.68	1684.11	1522.69	718.031	-1.08384	1.11473e-22	Sulf2	sulfatase 2 [Source:MGI Symbol;Acc:MGI:1919293]
ENSMUSG00000038546	6243.15	4992.92	5188.41	4522.27	1594.02	1768.37	2020.75	1278.93	1665.52	5236.69	1.65234	1.26817e-22	Ranbp9	RAN binding protein 9 [Source:MGI Symbol;Acc:MGI:1928741]
ENSMUSG00000042569	1558.6	1602	1475.49	1621.61	2705.29	2577.39	2782.54	2779.69	2711.23	1564.42	-0.793329	1.63274e-22	Dhrs7b	dehydrogenase/reductase (SDR family) member 7B [Source:MGI Symbol;Acc:MGI:2384931]
ENSMUSG00000051483	5242.03	6377.14	5620.78	5650.48	1604.23	2316.41	1753.39	2338.29	2003.08	5722.61	1.51493	2.14583e-22	Cbr1	carbonyl reductase 1 [Source:MGI Symbol;Acc:MGI:88284]
ENSMUSG00000050373	3984.06	4010.6	4160.41	2878.67	1218.03	1401.96	1230.58	939.389	1197.49	3758.43	1.64989	2.54871e-22	Snx21	sorting nexin family member 21 [Source:MGI Symbol;Acc:MGI:1917729]
ENSMUSG00000024646	9051.93	8988.56	8786.44	7968.71	3864.83	4347.84	4500.22	3508.56	4055.36	8698.91	1.10087	4.34807e-22	Cyb5a	cytochrome b5 type A (microsomal) [Source:MGI Symbol;Acc:MGI:1926952]
ENSMUSG00000031812	12560.2	11521.5	13376.2	11116.6	5188.69	5626.62	6458.71	5385.08	5664.78	12143.6	1.10004	5.79177e-22	Map1lc3b	microtubule-associated protein 1 light chain 3 beta [Source:MGI Symbol;Acc:MGI:1914693]
ENSMUSG00000042622	1129.55	1387.96	1554.11	690.335	240.449	208.78	195.941	275.026	230.049	1190.49	2.37259	6.16919e-22	Maff	v-maf musculoaponeurotic fibrosarcoma oncogene family, protein F (avian) [Source:MGI Symbol;Acc:MGI:96910]
ENSMUSG00000036478	6321.95	7232.35	6304.1	5681.91	2385	2107.63	2940.94	2049.68	2370.81	6385.08	1.42902	7.08531e-22	Btg1	B cell translocation gene 1, anti-proliferative [Source:MGI Symbol;Acc:MGI:88215]
ENSMUSG00000034088	13340.5	14132.9	12857.1	12876.5	7114.15	8128.85	7590.41	7266.12	7524.88	13301.8	0.821919	7.08531e-22	Hdlbp	high density lipoprotein (HDL) binding protein [Source:MGI Symbol;Acc:MGI:99256]
ENSMUSG00000061397	100.209	85.9881	91.7144	86.9466	294.295	317.346	232.565	282.949	281.789	91.2147	-1.62608	1.52126e-21	Krt79	keratin 79 [Source:MGI Symbol;Acc:MGI:2385030]
ENSMUSG00000036833	2672.58	2488.05	3084.02	1715.89	710.208	825.725	681.214	616.828	708.494	2490.13	1.81336	1.93383e-21	Pnpla7	patatin-like phospholipase domain containing 7 [Source:MGI Symbol;Acc:MGI:2385325]
ENSMUSG00000032754	1711.34	2361.87	2034.85	1808.07	864.318	664.964	657.408	650.782	709.368	1979.03	1.47976	1.99865e-21	Slc8b1	solute carrier family 8 (sodium/lithium/calcium exchanger), member B1 [Source:MGI Symbol;Acc:MGI:2180781]
ENSMUSG00000001506	359.976	464.523	318.481	340.454	3510.19	2426.02	1176.56	2492.21	2401.25	370.858	-2.69453	2.93776e-21	Col1a1	collagen, type I, alpha 1 [Source:MGI Symbol;Acc:MGI:88467]
ENSMUSG00000061758	815.297	767.351	711.542	748.998	1342.43	1364.38	1358.77	1401.16	1366.68	760.797	-0.844649	3.46633e-21	Akr1b10	aldo-keto reductase family 1, member B10 (aldose reductase) [Source:MGI Symbol;Acc:MGI:1915111]
ENSMUSG00000032501	358.03	421.529	514.004	409.592	1993.22	3629.64	1411.87	2547.67	2395.6	425.789	-2.49205	3.99592e-21	Trib1	tribbles pseudokinase 1 [Source:MGI Symbol;Acc:MGI:2443397]
ENSMUSG00000003849	158.584	148.61	140.091	201.13	40.8485	33.4048	38.4556	28.2949	35.251	162.104	2.19201	5.6329e-21	Nqo1	NAD(P)H dehydrogenase, quinone 1 [Source:MGI Symbol;Acc:MGI:103187]
ENSMUSG00000016194	24723.5	17535	18210.8	25558.1	5562.83	5652.72	8042.72	5102.13	6090.1	21506.9	1.82017	5.63496e-21	Hsd11b1	hydroxysteroid 11-beta dehydrogenase 1 [Source:MGI Symbol;Acc:MGI:103562]
ENSMUSG00000054836	351.22	430.875	461.595	328.931	142.97	125.268	130.932	126.761	131.483	393.155	1.57935	6.64696e-21	Elp6	elongator acetyltransferase complex subunit 6 [Source:MGI Symbol;Acc:MGI:1919349]
ENSMUSG00000041696	466.023	484.151	494.855	281.791	1573.6	2363.39	1558.37	2606.52	2025.47	431.705	-2.22941	6.81524e-21	Rasl12	RAS-like, family 12 [Source:MGI Symbol;Acc:MGI:1918034]
ENSMUSG00000001138	879.508	887.921	829.461	941.747	466.045	460.36	485.273	440.268	462.986	884.659	0.933074	9.89819e-21	Cnnm3	cyclin M3 [Source:MGI Symbol;Acc:MGI:2151055]
ENSMUSG00000012187	44.7537	38.3208	32.2512	45.0446	168.036	176.419	145.582	222.963	178.25	40.0926	-2.15024	1.23484e-20	Mogat1	monoacylglycerol O-acyltransferase 1 [Source:MGI Symbol;Acc:MGI:1915643]
ENSMUSG00000059201	1.94582	1.86931	2.0157	0	131.829	154.497	192.278	75.8302	138.609	1.45771	-6.55103	1.63784e-20	Lep	leptin [Source:MGI Symbol;Acc:MGI:104663]
ENSMUSG00000031710	37748.8	39368.5	45215.2	40870.2	102089	104324	101729	153376	115380	40800.7	-1.49972	1.80614e-20	Ucp1	uncoupling protein 1 (mitochondrial, proton carrier) [Source:MGI Symbol;Acc:MGI:98894]
ENSMUSG00000060181	695.629	774.828	651.071	774.139	316.576	323.609	341.522	267.103	312.203	723.917	1.21146	2.03822e-20	Slc35e3	solute carrier family 35, member E3 [Source:MGI Symbol;Acc:MGI:2448489]
ENSMUSG00000035283	37.9434	86.9228	90.7065	65.9956	463.26	969.783	392.797	1006.17	708.001	70.3921	-3.32946	2.10748e-20	Adrb1	adrenergic receptor, beta 1 [Source:MGI Symbol;Acc:MGI:87937]
ENSMUSG00000020774	875.617	806.606	835.508	806.613	1510.47	1698.43	1529.98	1443.04	1545.48	831.086	-0.894994	5.48664e-20	Aspa	aspartoacylase [Source:MGI Symbol;Acc:MGI:87914]
ENSMUSG00000019139	1346.5	1234.68	1533.95	1637.32	583.949	592.935	439.493	586.269	550.661	1438.11	1.3855	7.28778e-20	Isyna1	myo-inositol 1-phosphate synthase A1 [Source:MGI Symbol;Acc:MGI:1919030]
ENSMUSG00000049999	103.128	217.774	187.46	161.323	627.582	922.808	655.577	935.994	785.49	167.421	-2.22913	7.96816e-20	Ppp1r3d	protein phosphatase 1, regulatory subunit 3D [Source:MGI Symbol;Acc:MGI:1917664]
ENSMUSG00000040136	93.3991	112.158	90.7065	90.0893	16.7108	18.7902	16.481	16.9769	17.2397	96.5883	2.48929	1.22678e-19	Abcc8	ATP-binding cassette, sub-family C (CFTR/MRP), member 8 [Source:MGI Symbol;Acc:MGI:1352629]
ENSMUSG00000032401	384.298	377.6	265.065	266.078	2125.98	1929.13	911.947	2170.78	1784.46	323.26	-2.46408	1.34479e-19	Lctl	lactase-like [Source:MGI Symbol;Acc:MGI:2183549]
ENSMUSG00000038393	83911.3	80244.7	79913.5	81765.4	29842.6	21219.4	33267.8	19266.5	25899.1	81458.7	1.65313	1.43927e-19	Txnip	thioredoxin interacting protein [Source:MGI Symbol;Acc:MGI:1889549]
ENSMUSG00000038332	2509.13	1635.64	2305.96	1496.95	512.464	445.745	575.919	313.507	461.909	1986.92	2.10368	1.5799e-19	Sesn1	sestrin 1 [Source:MGI Symbol;Acc:MGI:2155278]
ENSMUSG00000027313	321.059	286.939	423.297	263.983	90.0525	67.8535	75.9956	45.2718	69.7933	323.819	2.20723	1.8806e-19	Chac1	ChaC, cation transport regulator 1 [Source:MGI Symbol;Acc:MGI:1916315]
ENSMUSG00000018846	1919.55	1513.2	1381.76	1811.21	3805.41	5306.14	4883.86	4077.86	4518.32	1656.43	-1.44775	3.62353e-19	Pank3	pantothenate kinase 3 [Source:MGI Symbol;Acc:MGI:2387464]
ENSMUSG00000036687	96.3178	124.309	143.115	81.7089	12.9973	17.7463	13.7341	18.1087	15.6466	111.363	2.84199	4.91572e-19	Tmem184a	transmembrane protein 184a [Source:MGI Symbol;Acc:MGI:2385897]
ENSMUSG00000001627	4729.3	3588.14	2988.28	2873.43	1160.47	1098.18	1311.15	997.111	1141.73	3544.79	1.6342	5.30872e-19	Ifrd1	interferon-related developmental regulator 1 [Source:MGI Symbol;Acc:MGI:1316717]
ENSMUSG00000070002	1424.34	1468.34	1737.53	1383.81	687.927	628.428	636.349	776.411	682.279	1503.51	1.14061	5.30872e-19	Ell	elongation factor RNA polymerase II [Source:MGI Symbol;Acc:MGI:109377]
ENSMUSG00000044122	457.267	489.759	518.035	480.825	889.384	861.217	900.96	860.164	877.931	486.471	-0.852221	7.74051e-19	Proca1	protein interacting with cyclin A1 [Source:MGI Symbol;Acc:MGI:1918274]
ENSMUSG00000001270	2489.67	3432.98	2957.03	1734.74	707.423	769.354	579.581	800.179	714.134	2653.61	1.89426	1.02119e-18	Ckb	creatine kinase, brain [Source:MGI Symbol;Acc:MGI:88407]
ENSMUSG00000020782	323.978	397.228	353.755	370.833	164.323	148.234	130.932	129.025	143.128	361.449	1.33496	1.11003e-18	Llgl2	LLGL2 scribble cell polarity complex component [Source:MGI Symbol;Acc:MGI:1918843]
ENSMUSG00000063410	1276.45	1224.4	1238.65	1342.96	699.996	716.115	769.112	735.666	730.222	1270.61	0.798822	1.66663e-18	Stk24	serine/threonine kinase 24 [Source:MGI Symbol;Acc:MGI:2385007]
ENSMUSG00000019883	903.831	701.925	630.914	847.468	1851.18	2069.01	1806.5	2376.77	2025.86	771.035	-1.39344	2.02983e-18	Echdc1	enoyl Coenzyme A hydratase domain containing 1 [Source:MGI Symbol;Acc:MGI:1277169]
ENSMUSG00000019577	120815	113725	108544	145101	62080.5	57531.4	53773.8	59584.4	58242.5	122046	1.06728	2.04456e-18	Pdk4	pyruvate dehydrogenase kinase, isoenzyme 4 [Source:MGI Symbol;Acc:MGI:1351481]
ENSMUSG00000045103	624.607	457.98	589.592	556.249	205.171	225.482	223.409	162.978	204.26	557.107	1.44516	2.09038e-18	Dmd	dystrophin, muscular dystrophy [Source:MGI Symbol;Acc:MGI:94909]
ENSMUSG00000044252	3988.92	3273.16	3361.18	3973.36	1801.05	1962.53	1777.2	1644.5	1796.32	3649.15	1.02234	2.77462e-18	Osbpl1a	oxysterol binding protein-like 1A [Source:MGI Symbol;Acc:MGI:1927551]
ENSMUSG00000015852	11.6749	15.8891	18.1413	12.5706	77.9836	93.951	86.9829	86.0164	86.2335	14.569	-2.56322	3.0346e-18	Fcrls	Fc receptor-like S, scavenger receptor [Source:MGI Symbol;Acc:MGI:1933397]
ENSMUSG00000024030	1460.33	1447.78	1102.59	1401.62	475.329	232.79	218.831	303.321	307.567	1353.08	2.1367	3.13092e-18	Abcg1	ATP binding cassette subfamily G member 1 [Source:MGI Symbol;Acc:MGI:107704]
ENSMUSG00000024011	51.5641	66.3604	50.3925	27.2363	339.786	456.184	209.675	276.158	320.451	48.8883	-2.70848	3.56726e-18	Pi16	peptidase inhibitor 16 [Source:MGI Symbol;Acc:MGI:1921366]
ENSMUSG00000044337	557.476	338.345	387.015	315.312	1330.36	2966.76	1698.46	2960.77	2239.09	399.537	-2.48613	6.85118e-18	Ackr3	atypical chemokine receptor 3 [Source:MGI Symbol;Acc:MGI:109562]
ENSMUSG00000025515	345.382	406.574	402.132	466.16	78.912	109.609	98.8859	39.6128	81.755	405.062	2.30412	7.60615e-18	Muc2	mucin 2 [Source:MGI Symbol;Acc:MGI:1339364]
ENSMUSG00000032531	590.555	623.414	692.393	675.67	1163.26	1501.13	1521.74	1548.29	1433.61	645.508	-1.15105	9.58664e-18	Amotl2	angiomotin-like 2 [Source:MGI Symbol;Acc:MGI:1929286]
ENSMUSG00000098557	1545.95	1584.24	1441.23	1398.48	544.028	702.545	408.362	502.517	539.363	1492.47	1.4691	9.7902e-18	Kctd12	potassium channel tetramerisation domain containing 12 [Source:MGI Symbol;Acc:MGI:2145823]
ENSMUSG00000020264	8305.71	9060.53	9838.64	8542.77	15024.8	16283.8	18065.9	16987.1	16590.4	8936.91	-0.892496	9.97359e-18	Slc36a2	solute carrier family 36 (proton/amino acid symporter), member 2 [Source:MGI Symbol;Acc:MGI:1891430]
ENSMUSG00000057137	1221	1716.02	1359.59	1082.12	474.4	400.858	548.45	438.004	465.428	1344.68	1.53004	1.10551e-17	Tmem140	transmembrane protein 140 [Source:MGI Symbol;Acc:MGI:1915737]
ENSMUSG00000038807	686.873	858.947	753.872	719.667	281.298	221.307	139.173	157.319	199.774	754.84	1.91683	1.28115e-17	Rap1gap2	RAP1 GTPase activating protein 2 [Source:MGI Symbol;Acc:MGI:3028623]
ENSMUSG00000021903	2733.87	2816.11	2717.16	2310.89	1130.76	1070	1025.48	698.317	981.14	2644.51	1.4298	1.5902e-17	Galnt15	polypeptide N-acetylgalactosaminyltransferase 15 [Source:MGI Symbol;Acc:MGI:1926004]
ENSMUSG00000025337	2304.82	2146.9	2255.57	2049.01	1235.67	1356.03	1274.53	1323.07	1297.32	2189.07	0.755243	1.79233e-17	Sbds	SBDS ribosome maturation factor [Source:MGI Symbol;Acc:MGI:1913961]
ENSMUSG00000019978	1353.31	1218.79	1303.15	1306.29	2889.11	2499.1	2475.81	3384.07	2812.02	1295.39	-1.11802	3.42864e-17	Epb41l2	erythrocyte membrane protein band 4.1 like 2 [Source:MGI Symbol;Acc:MGI:103009]
ENSMUSG00000084128	144.963	292.547	314.449	195.892	45.4904	48.0194	36.6244	28.2949	39.6073	236.963	2.57788	3.67517e-17	Esrp2	epithelial splicing regulatory protein 2 [Source:MGI Symbol;Acc:MGI:1924661]
ENSMUSG00000020125	83.6701	79.4456	89.6987	74.376	12.9973	16.7024	15.5654	7.92256	13.2969	81.7976	2.60894	5.03873e-17	Elane	elastase, neutrophil expressed [Source:MGI Symbol;Acc:MGI:2679229]
ENSMUSG00000020241	528.289	650.519	502.917	694.525	2808.34	2043.96	1391.73	2500.13	2186.04	594.063	-1.87958	6.21985e-17	Col6a2	collagen, type VI, alpha 2 [Source:MGI Symbol;Acc:MGI:88460]
ENSMUSG00000025532	1161.65	1330.95	1475.49	1081.07	372.279	385.199	578.665	418.764	438.727	1262.29	1.52394	6.98364e-17	Crcp	calcitonin gene-related peptide-receptor component protein [Source:MGI Symbol;Acc:MGI:1100818]
ENSMUSG00000042726	4397.54	4217.16	4166.45	3565.86	1582.88	1322.62	1943.84	1178.2	1506.89	4086.75	1.43884	7.38085e-17	Trafd1	TRAF type zinc finger domain containing 1 [Source:MGI Symbol;Acc:MGI:1923551]
ENSMUSG00000059327	494.237	451.438	487.8	540.536	172.678	205.648	246.299	189.01	203.409	493.503	1.27697	7.38085e-17	Eda	ectodysplasin-A [Source:MGI Symbol;Acc:MGI:1195272]
ENSMUSG00000034659	4442.3	5075.17	5217.64	6047.5	1923.6	2242.3	2443.76	2551.06	2290.18	5195.65	1.18197	7.41759e-17	Tmem109	transmembrane protein 109 [Source:MGI Symbol;Acc:MGI:1915789]
ENSMUSG00000038400	1001.12	1058.96	1163.06	821.279	2437.92	3023.13	3339.23	4630.17	3357.61	1011.11	-1.73121	8.39902e-17	Pmepa1	prostate transmembrane protein, androgen induced 1 [Source:MGI Symbol;Acc:MGI:1929600]
ENSMUSG00000029096	610.013	664.539	639.985	491.301	1409.27	1262.08	1276.36	1191.78	1284.87	601.459	-1.0948	9.46744e-17	Htra3	HtrA serine peptidase 3 [Source:MGI Symbol;Acc:MGI:1925808]
ENSMUSG00000039518	70.0493	50.4713	49.3847	28.2838	220.025	194.165	204.181	199.196	204.392	49.5473	-2.04089	1.0843e-16	Cdsn	corneodesmosin [Source:MGI Symbol;Acc:MGI:3505689]
ENSMUSG00000032290	1466.17	1193.55	1174.15	1539.9	655.434	603.374	580.497	639.464	619.692	1343.44	1.11627	1.09673e-16	Ptpn9	protein tyrosine phosphatase, non-receptor type 9 [Source:MGI Symbol;Acc:MGI:1928376]
ENSMUSG00000025170	480.616	574.812	605.718	618.054	164.323	244.273	206.012	143.738	189.586	569.8	1.58647	1.15639e-16	Rab40b	Rab40B, member RAS oncogene family [Source:MGI Symbol;Acc:MGI:2183451]
ENSMUSG00000068874	3043.25	3253.53	3276.52	2619.92	972.01	1205.7	1465.89	937.126	1145.18	3048.31	1.41205	1.48107e-16	Selenbp1	selenium binding protein 1 [Source:MGI Symbol;Acc:MGI:96825]
ENSMUSG00000021559	1710.37	2001.09	1587.36	1531.52	627.582	389.375	666.564	634.937	579.614	1707.59	1.5585	1.86295e-16	Dapk1	death associated protein kinase 1 [Source:MGI Symbol;Acc:MGI:1916885]
ENSMUSG00000041769	3674.67	3213.34	3021.54	3089.22	1716.57	1766.28	1822.06	1513.21	1704.53	3249.69	0.930614	2.29394e-16	Ppp2r2d	protein phosphatase 2, regulatory subunit B, delta [Source:MGI Symbol;Acc:MGI:1289252]
ENSMUSG00000058258	136.207	100.008	102.801	167.608	566.309	384.155	386.387	559.106	473.99	126.656	-1.90515	2.29394e-16	Idi1	isopentenyl-diphosphate delta isomerase [Source:MGI Symbol;Acc:MGI:2442264]
ENSMUSG00000033107	1587.79	841.188	715.574	979.459	261.802	213.999	244.468	148.265	217.134	1031	2.24571	2.32798e-16	Rnf125	ring finger protein 125 [Source:MGI Symbol;Acc:MGI:1914914]
ENSMUSG00000025420	1276.45	834.646	660.142	1088.4	252.518	313.17	224.324	183.351	243.341	964.912	1.98693	2.34999e-16	Katnal2	katanin p60 subunit A-like 2 [Source:MGI Symbol;Acc:MGI:1924234]
ENSMUSG00000052373	437.808	425.267	418.258	299.599	127.188	120.048	71.4176	69.0395	96.9233	395.233	2.02636	2.35568e-16	Mpp3	membrane protein, palmitoylated 3 (MAGUK p55 subfamily member 3) [Source:MGI Symbol;Acc:MGI:1328354]
ENSMUSG00000059824	238.362	228.99	409.187	157.132	1219.89	2146.26	1069.43	1372.87	1452.11	258.418	-2.49014	2.37149e-16	Dbp	D site albumin promoter binding protein [Source:MGI Symbol;Acc:MGI:94866]
ENSMUSG00000022894	113.83	136.459	122.958	115.23	382.491	314.214	282.923	290.871	317.625	122.119	-1.37897	2.60306e-16	Adamts5	a disintegrin-like and metallopeptidase (reprolysin type) with thrombospondin type 1 motif, 5 (aggrecanase-2) [Source:MGI Symbol;Acc:MGI:1346321]
ENSMUSG00000025092	134.261	128.982	144.123	126.754	370.422	316.302	275.599	355.383	329.426	133.53	-1.30208	3.65754e-16	Hspa12a	heat shock protein 12A [Source:MGI Symbol;Acc:MGI:1920692]
ENSMUSG00000018217	639.2	750.527	616.804	721.762	1515.11	1385.26	1222.34	1569.8	1423.13	682.073	-1.06061	5.244e-16	Pmp22	peripheral myelin protein 22 [Source:MGI Symbol;Acc:MGI:97631]
ENSMUSG00000025934	537.045	471.065	449.501	391.784	163.394	156.585	217	176.56	178.385	462.349	1.37295	5.3779e-16	Gsta3	glutathione S-transferase, alpha 3 [Source:MGI Symbol;Acc:MGI:95856]
ENSMUSG00000005846	1564.44	1430.02	1560.15	1477.05	852.249	933.247	940.331	895.249	905.269	1507.91	0.736122	5.3779e-16	Rsl1d1	ribosomal L1 domain containing 1 [Source:MGI Symbol;Acc:MGI:1913659]
ENSMUSG00000026483	2358.33	2476.83	2476.29	2807.43	1325.72	1298.61	970.546	1070.68	1166.39	2529.72	1.11683	8.54957e-16	Fam129a	family with sequence similarity 129, member A [Source:MGI Symbol;Acc:MGI:2137237]
ENSMUSG00000030256	109.939	113.093	127.997	70.1858	300.794	308.994	390.965	332.748	333.375	105.304	-1.66121	8.81753e-16	Bhlhe41	basic helix-loop-helix family, member e41 [Source:MGI Symbol;Acc:MGI:1930704]
ENSMUSG00000051225	4.86454	1.86931	4.0314	9.42795	66.8431	84.5559	50.3585	66.7759	67.1333	5.0483	-3.75281	8.91785e-16	Fam83a	family with sequence similarity 83, member A [Source:MGI Symbol;Acc:MGI:2447773]
ENSMUSG00000070436	733.572	1391.7	1356.57	1229.82	7406.58	4001.27	3687.16	5922.68	5254.42	1177.92	-2.1573	1.05289e-15	Serpinh1	serine (or cysteine) peptidase inhibitor, clade H, member 1 [Source:MGI Symbol;Acc:MGI:88283]
ENSMUSG00000038456	355.111	454.242	377.944	351.977	125.331	175.375	108.042	123.366	133.028	384.818	1.53493	1.23088e-15	Dennd2a	DENN/MADD domain containing 2A [Source:MGI Symbol;Acc:MGI:2444961]
ENSMUSG00000028967	2373.89	2314.2	2355.35	1417.33	805.83	613.813	625.362	469.695	628.675	2115.19	1.74975	1.34827e-15	Errfi1	ERBB receptor feedback inhibitor 1 [Source:MGI Symbol;Acc:MGI:1921405]
ENSMUSG00000032724	373.597	403.77	514.004	503.871	187.532	182.682	184.953	193.537	187.176	448.811	1.26132	1.89287e-15	Abtb2	ankyrin repeat and BTB (POZ) domain containing 2 [Source:MGI Symbol;Acc:MGI:2139365]
ENSMUSG00000019558	1526.49	1659.95	1687.14	1125.07	653.577	668.096	634.518	641.727	649.479	1499.66	1.20755	1.89287e-15	Slc6a8	solute carrier family 6 (neurotransmitter transporter, creatine), member 8 [Source:MGI Symbol;Acc:MGI:2147834]
ENSMUSG00000054263	8376.73	5735.04	5469.6	3851.84	1294.16	1496.95	1187.55	594.192	1143.21	5858.3	2.35715	2.24773e-15	Lifr	leukemia inhibitory factor receptor [Source:MGI Symbol;Acc:MGI:96788]
ENSMUSG00000022863	826.971	657.996	735.731	561.487	275.728	305.863	300.32	236.545	279.614	695.546	1.31383	2.5279e-15	Btg3	B cell translocation gene 3 [Source:MGI Symbol;Acc:MGI:109532]
ENSMUSG00000015980	77.8326	100.008	100.785	95.327	306.364	254.712	230.734	366.701	289.628	93.4882	-1.62984	2.90685e-15	Lrrc27	leucine rich repeat containing 27 [Source:MGI Symbol;Acc:MGI:1923862]
ENSMUSG00000001313	363.867	327.129	160.248	355.119	70.5566	70.9852	57.6834	64.5123	65.9344	301.591	2.1941	3.35816e-15	Rnd2	Rho family GTPase 2 [Source:MGI Symbol;Acc:MGI:1338755]
ENSMUSG00000046447	428.079	581.355	600.679	497.586	189.389	217.131	210.59	244.468	215.394	526.925	1.2927	3.79167e-15	Camk2n1	calcium/calmodulin-dependent protein kinase II inhibitor 1 [Source:MGI Symbol;Acc:MGI:1913509]
ENSMUSG00000022024	3588.08	3093.7	3135.42	3087.13	1970.01	1857.1	1877	1687.51	1847.9	3226.08	0.80355	4.14182e-15	Sugt1	SGT1, suppressor of G2 allele of SKP1 (S. cerevisiae) [Source:MGI Symbol;Acc:MGI:1915205]
ENSMUSG00000037686	30783.8	30145.4	30150.9	27149.3	11958.4	11883.8	6746.21	11628.1	10554.1	29557.3	1.48576	4.94446e-15	Aspg	asparaginase [Source:MGI Symbol;Acc:MGI:2144822]
ENSMUSG00000064225	905.777	870.163	842.563	1342.96	2278.23	2801.83	2670.83	3186	2734.22	990.365	-1.46525	4.96675e-15	Paqr9	progestin and adipoQ receptor family member IX [Source:MGI Symbol;Acc:MGI:1922802]
ENSMUSG00000026837	278.252	302.828	285.222	281.791	1229.17	866.437	601.556	1126.14	955.824	287.023	-1.73519	5.2668e-15	Col5a1	collagen, type V, alpha 1 [Source:MGI Symbol;Acc:MGI:88457]
ENSMUSG00000026773	8073.19	6550.05	6946.11	3726.13	18400.4	21144.2	30169.3	28598.2	24578	6323.87	-1.95846	5.60053e-15	Pfkfb3	6-phosphofructo-2-kinase/fructose-2,6-biphosphatase 3 [Source:MGI Symbol;Acc:MGI:2181202]
ENSMUSG00000030849	737.464	730.899	756.896	558.344	251.59	233.834	286.586	157.319	232.332	695.901	1.57998	5.75027e-15	Fgfr2	fibroblast growth factor receptor 2 [Source:MGI Symbol;Acc:MGI:95523]
ENSMUSG00000022999	1191.81	1055.22	888.924	987.839	514.32	429.043	488.02	526.284	489.417	1030.95	1.07508	5.75027e-15	Lmbr1l	limb region 1 like [Source:MGI Symbol;Acc:MGI:1289247]
ENSMUSG00000073481	4526.94	4490.08	4138.23	4041.45	2444.41	2764.25	2683.65	2491.08	2595.85	4299.17	0.727919	5.75027e-15	44257	mitochondrial amidoxime reducing component 2 [Source:MGI Symbol;Acc:MGI:1914497]
ENSMUSG00000022330	132.315	141.133	102.801	173.893	34.3499	17.7463	30.2151	35.0856	29.3492	137.536	2.22677	6.48991e-15	Osr2	odd-skipped related 2 [Source:MGI Symbol;Acc:MGI:1930813]
ENSMUSG00000020430	1781.39	1702.94	1682.1	1737.89	1125.19	1083.57	1019.07	1128.4	1089.06	1726.08	0.664812	7.02957e-15	Pes1	pescadillo ribosomal biogenesis factor 1 [Source:MGI Symbol;Acc:MGI:1890613]
ENSMUSG00000032018	548.72	507.517	567.42	666.242	1298.8	1193.18	1271.78	1738.44	1375.55	572.475	-1.2647	7.89214e-15	Sc5d	sterol-C5-desaturase [Source:MGI Symbol;Acc:MGI:1353611]
ENSMUSG00000027947	1437.96	1515.07	1754.67	919.749	410.342	390.419	430.337	226.359	364.364	1406.86	1.94782	8.67179e-15	Il6ra	interleukin 6 receptor, alpha [Source:MGI Symbol;Acc:MGI:105304]
ENSMUSG00000039989	238.362	355.168	250.955	230.461	902.382	1696.34	843.277	2116.46	1389.61	268.737	-2.36953	9.8519e-15	Cbx4	chromobox 4 [Source:MGI Symbol;Acc:MGI:1195985]
ENSMUSG00000029752	2981.96	3255.4	2630.49	3430.73	1287.66	1516.79	1692.96	1400.03	1474.36	3074.64	1.06019	1.10903e-14	Asns	asparagine synthetase [Source:MGI Symbol;Acc:MGI:1350929]
ENSMUSG00000090523	570.124	678.559	586.569	714.429	1404.63	1329.93	1244.31	1740.7	1429.89	637.42	-1.16519	1.17606e-14	Gypc	glycophorin C [Source:MGI Symbol;Acc:MGI:1098566]
ENSMUSG00000043110	538.018	382.273	585.561	520.632	207.028	215.043	177.628	204.855	201.139	506.621	1.3331	1.40034e-14	Lrrn4	leucine rich repeat neuronal 4 [Source:MGI Symbol;Acc:MGI:2445154]
ENSMUSG00000029661	905.777	1022.51	843.571	695.573	5238.83	4074.34	1896.23	3695.31	3726.18	866.858	-2.10366	1.47714e-14	Col1a2	collagen, type I, alpha 2 [Source:MGI Symbol;Acc:MGI:88468]
ENSMUSG00000034957	7158.65	9582.07	10404	8302.88	18866.5	21457.4	20423.6	27793.5	22135.2	8861.91	-1.32062	1.55794e-14	Cebpa	CCAAT/enhancer binding protein (C/EBP), alpha [Source:MGI Symbol;Acc:MGI:99480]
ENSMUSG00000042678	85.6159	81.3149	73.5731	98.4697	6.49863	13.5707	21.059	12.4497	13.3945	84.7434	2.65675	1.66993e-14	Myo15	myosin XV [Source:MGI Symbol;Acc:MGI:1261811]
ENSMUSG00000034903	1652.97	1501.99	1465.41	1352.39	637.794	798.583	820.386	649.65	726.604	1493.19	1.03892	1.84015e-14	Cobll1	Cobl-like 1 [Source:MGI Symbol;Acc:MGI:2442894]
ENSMUSG00000058135	4810.06	5304.16	5376.88	5219.94	2559.53	2960.5	3042.57	3215.43	2944.51	5177.76	0.814536	1.98859e-14	Gstm1	glutathione S-transferase, mu 1 [Source:MGI Symbol;Acc:MGI:95860]
ENSMUSG00000055675	394.028	514.06	575.483	596.056	1398.13	1195.27	1085	1275.53	1238.48	519.906	-1.25266	2.28054e-14	Kbtbd11	kelch repeat and BTB (POZ) domain containing 11 [Source:MGI Symbol;Acc:MGI:1922151]
ENSMUSG00000075701	1395.15	1520.68	1423.08	1408.95	841.109	869.569	911.947	763.961	846.647	1436.97	0.762451	2.59629e-14	Selenos	selenoprotein S [Source:MGI Symbol;Acc:MGI:95994]
ENSMUSG00000021509	106.047	164.499	113.887	113.135	537.53	668.096	297.573	699.449	550.662	124.392	-2.14447	2.97562e-14	Slc25a48	solute carrier family 25, member 48 [Source:MGI Symbol;Acc:MGI:2145373]
ENSMUSG00000038803	605.149	604.721	629.907	604.436	956.227	969.783	1042.88	1065.02	1008.48	611.053	-0.722542	3.01184e-14	Ost4	oligosaccharyltransferase complex subunit 4 (non-catalytic) [Source:MGI Symbol;Acc:MGI:1914945]
ENSMUSG00000021025	4254.52	4119.02	4539.36	3574.24	1642.3	1219.28	1748.81	919.017	1382.35	4121.79	1.57555	3.09135e-14	Nfkbia	nuclear factor of kappa light polypeptide gene enhancer in B cells inhibitor, alpha [Source:MGI Symbol;Acc:MGI:104741]
ENSMUSG00000067235	2915.8	2703.95	2430.94	2188.33	6095.72	5976.33	4481.91	5789.13	5585.77	2559.76	-1.12557	3.21065e-14	H2-Q10	histocompatibility 2, Q region locus 10 [Source:MGI Symbol;Acc:MGI:95929]
ENSMUSG00000033361	641.146	543.034	522.067	615.959	217.24	260.975	190.447	136.947	201.402	580.551	1.52579	3.68924e-14	Prrg3	proline rich Gla (G-carboxyglutamic acid) 3 (transmembrane) [Source:MGI Symbol;Acc:MGI:2685214]
ENSMUSG00000037788	452.402	498.17	523.074	575.105	262.73	264.107	259.118	263.708	262.416	512.188	0.96439	3.97275e-14	Vopp1	vesicular, overexpressed in cancer, prosurvival protein 1 [Source:MGI Symbol;Acc:MGI:2141658]
ENSMUSG00000004558	15775.7	15275	18290.5	15317.3	7593.19	9089.24	9158.85	9336.17	8794.36	16164.6	0.878241	4.01441e-14	Ndrg2	N-myc downstream regulated gene 2 [Source:MGI Symbol;Acc:MGI:1352498]
ENSMUSG00000018669	1354.29	1344.97	1142.9	1384.86	702.781	786.057	698.61	733.403	730.213	1306.75	0.840109	4.23982e-14	Cdk5rap3	CDK5 regulatory subunit associated protein 3 [Source:MGI Symbol;Acc:MGI:1933126]
ENSMUSG00000040414	1382.5	1380.48	1325.32	1344.01	873.602	730.73	827.711	827.342	814.846	1358.08	0.736554	4.70667e-14	Slc25a28	solute carrier family 25, member 28 [Source:MGI Symbol;Acc:MGI:2180509]
ENSMUSG00000027274	225.715	273.854	253.978	268.173	610.871	490.633	540.21	485.54	531.814	255.43	-1.05922	5.09309e-14	Mkks	McKusick-Kaufman syndrome [Source:MGI Symbol;Acc:MGI:1891836]
ENSMUSG00000031298	662.55	423.398	400.117	355.119	136.471	148.234	130.932	89.4118	126.262	460.296	1.86438	6.26636e-14	Adgrg2	adhesion G protein-coupled receptor G2 [Source:MGI Symbol;Acc:MGI:2446854]
ENSMUSG00000032078	830.863	833.711	811.32	738.523	449.334	480.194	488.02	467.431	471.245	803.604	0.7704	6.8196e-14	Zpr1	ZPR1 zinc finger [Source:MGI Symbol;Acc:MGI:1330262]
ENSMUSG00000090145	133.288	106.551	97.7615	109.993	38.0634	29.2292	29.2995	28.2949	31.2217	111.898	1.83718	7.01539e-14	Ugt1a6b	UDP glucuronosyltransferase 1 family, polypeptide A6B [Source:MGI Symbol;Acc:MGI:3580629]
ENSMUSG00000020108	18438.5	17684.6	22556.7	12581.1	1958.87	1541.84	2389.74	599.851	1622.58	17815.2	3.45658	7.16071e-14	Ddit4	DNA-damage-inducible transcript 4 [Source:MGI Symbol;Acc:MGI:1921997]
ENSMUSG00000041734	594.447	622.479	692.393	452.541	261.802	262.019	237.143	255.786	254.187	590.465	1.2167	7.65569e-14	Kirrel	kirre like nephrin family adhesion molecule 1 [Source:MGI Symbol;Acc:MGI:1891396]
ENSMUSG00000027610	1600.43	1704.81	1311.21	1626.84	724.133	625.296	862.504	651.914	715.962	1560.82	1.1235	7.78406e-14	Gss	glutathione synthetase [Source:MGI Symbol;Acc:MGI:95852]
ENSMUSG00000020142	266.577	235.533	154.201	138.277	34.3499	46.9755	26.5527	52.0625	39.9852	198.647	2.32222	8.35906e-14	Slc1a4	solute carrier family 1 (glutamate/neutral amino acid transporter), member 4 [Source:MGI Symbol;Acc:MGI:2135601]
ENSMUSG00000027357	11513.4	11461.7	11758.6	10641	6571.97	7141.32	7645.34	6521.4	6970.01	11343.7	0.70259	9.04266e-14	Crls1	cardiolipin synthase 1 [Source:MGI Symbol;Acc:MGI:1913836]
ENSMUSG00000066042	229.606	268.246	340.653	202.177	92.8376	69.9413	72.3332	49.799	71.2278	260.171	1.86362	9.20762e-14	Med18	mediator complex subunit 18 [Source:MGI Symbol;Acc:MGI:1914469]
ENSMUSG00000048126	499.102	703.794	490.823	516.442	3124.91	1929.13	1244.31	2385.82	2171.04	552.54	-1.97399	1.02211e-13	Col6a3	collagen, type VI, alpha 3 [Source:MGI Symbol;Acc:MGI:88461]
ENSMUSG00000049717	90.4804	78.5109	81.6359	102.66	220.025	199.385	211.506	203.723	208.66	88.3218	-1.24329	1.07028e-13	Lig4	ligase IV, DNA, ATP-dependent [Source:MGI Symbol;Acc:MGI:1335098]
ENSMUSG00000022747	1651.02	1622.56	1865.53	1364.96	632.224	822.593	777.353	574.952	701.78	1626.02	1.21191	1.16392e-13	St3gal6	ST3 beta-galactoside alpha-2,3-sialyltransferase 6 [Source:MGI Symbol;Acc:MGI:1888707]
ENSMUSG00000021360	1216.13	955.216	823.414	648.433	360.21	241.141	206.012	256.917	266.07	910.799	1.77514	1.52111e-13	Gcnt2	glucosaminyl (N-acetyl) transferase 2, I-branching enzyme [Source:MGI Symbol;Acc:MGI:1100870]
ENSMUSG00000007659	2116.07	2832.94	2746.39	2363.27	1326.65	1382.12	1269.95	1230.26	1302.25	2514.67	0.949355	1.61566e-13	Bcl2l1	BCL2-like 1 [Source:MGI Symbol;Acc:MGI:88139]
ENSMUSG00000023150	29324.4	25845	23549.4	16040.1	6048.37	7645.52	6912.85	3293.52	5975.07	23689.7	1.98718	1.65963e-13	Ivns1abp	influenza virus NS1A binding protein [Source:MGI Symbol;Acc:MGI:2152389]
ENSMUSG00000069456	60.3203	77.5763	44.3454	134.086	1.85675	3.1317	3.66244	9.05435	4.42631	79.0821	4.19699	1.82734e-13	Rdh16	retinol dehydrogenase 16 [Source:MGI Symbol;Acc:MGI:1201375]
ENSMUSG00000021226	4868.43	5825.7	4381.13	7270	1179.04	1822.65	1998.78	2118.72	1779.8	5586.31	1.65036	1.83862e-13	Acot2	acyl-CoA thioesterase 2 [Source:MGI Symbol;Acc:MGI:2159605]
ENSMUSG00000053964	1449.63	1801.08	1643.8	2164.24	762.197	830.944	820.386	885.063	824.648	1764.69	1.09778	1.8472e-13	Lgals4	lectin, galactose binding, soluble 4 [Source:MGI Symbol;Acc:MGI:107536]
ENSMUSG00000022094	4033.67	3342.32	2990.29	2243.85	1025.86	1304.87	849.686	735.666	979.021	3152.54	1.68708	1.84738e-13	Slc39a14	solute carrier family 39 (zinc transporter), member 14 [Source:MGI Symbol;Acc:MGI:2384851]
ENSMUSG00000021242	7289.02	6814.56	7545.78	7485.79	12916.5	11300.2	10960.8	12513.1	11922.6	7283.79	-0.710961	1.98742e-13	Npc2	NPC intracellular cholesterol transporter 2 [Source:MGI Symbol;Acc:MGI:1915213]
ENSMUSG00000005718	253.929	253.291	220.719	218.938	93.766	87.6876	117.198	82.621	95.3182	236.719	1.30806	1.99454e-13	Tfap4	transcription factor AP4 [Source:MGI Symbol;Acc:MGI:103239]
ENSMUSG00000042628	1364.99	1344.03	1431.15	1215.16	610.871	616.945	763.619	767.357	689.698	1338.83	0.957361	2.01533e-13	Zfyve1	zinc finger, FYVE domain containing 1 [Source:MGI Symbol;Acc:MGI:3026685]
ENSMUSG00000052934	18786.8	20363.3	22594	13570	4320.66	4516.96	5831.52	1924.05	4148.3	18828.5	2.18221	2.12371e-13	Fbxo31	F-box protein 31 [Source:MGI Symbol;Acc:MGI:1354708]
ENSMUSG00000045817	1185	1331.88	1243.69	1517.9	3787.77	4054.51	2555.47	5328.49	3931.56	1319.62	-1.57485	2.32357e-13	Zfp36l2	zinc finger protein 36, C3H type-like 2 [Source:MGI Symbol;Acc:MGI:107945]
ENSMUSG00000039648	1045.88	1130	1038.09	1119.83	615.513	695.237	661.07	595.324	641.786	1083.45	0.755162	2.33645e-13	Kyat1	kynurenine aminotransferase 1 [Source:MGI Symbol;Acc:MGI:1917516]
ENSMUSG00000037211	534.126	723.422	668.205	654.719	342.571	310.038	317.717	293.135	315.865	645.118	1.02923	2.47808e-13	Spry1	sprouty RTK signaling antagonist 1 [Source:MGI Symbol;Acc:MGI:1345139]
ENSMUSG00000038260	728.708	1062.7	717.59	971.079	285.011	277.677	158.401	318.034	259.781	870.019	1.74548	2.61805e-13	Trpm4	transient receptor potential cation channel, subfamily M, member 4 [Source:MGI Symbol;Acc:MGI:1915917]
ENSMUSG00000035172	328.843	441.157	493.847	316.36	851.321	1065.82	1135.36	1299.3	1087.95	395.052	-1.46084	2.77709e-13	Plekhh3	pleckstrin homology domain containing, family H (with MyTH4 domain) member 3 [Source:MGI Symbol;Acc:MGI:2384950]
ENSMUSG00000056413	94.372	91.5961	83.6516	87.9942	283.155	339.267	207.843	451.586	320.463	89.4035	-1.83925	2.77709e-13	Adap1	ArfGAP with dual PH domains 1 [Source:MGI Symbol;Acc:MGI:2442201]
ENSMUSG00000089665	412.513	336.475	374.92	472.445	829.04	864.349	1057.53	802.442	888.34	399.088	-1.15565	2.82119e-13	Fcor	Foxo1 corepressor [Source:MGI Symbol;Acc:MGI:1915484]
ENSMUSG00000062373	4380.03	4499.42	4009.23	4490.85	2873.32	2775.73	2533.49	2487.68	2667.56	4344.88	0.70367	3.53191e-13	Tmem65	transmembrane protein 65 [Source:MGI Symbol;Acc:MGI:1922118]
ENSMUSG00000034936	500.074	334.606	607.734	318.455	96.5511	98.1266	143.751	133.552	117.995	440.217	1.89968	4.29362e-13	Arl4d	ADP-ribosylation factor-like 4D [Source:MGI Symbol;Acc:MGI:1933155]
ENSMUSG00000060981	148.855	132.721	160.248	79.6138	411.271	410.253	348.847	509.307	419.92	130.359	-1.68549	4.29362e-13	Hist1h4h	histone cluster 1, H4h [Source:MGI Symbol;Acc:MGI:2448427]
ENSMUSG00000037606	1367.91	1808.55	1634.73	1054.88	368.565	580.408	497.176	565.897	503.012	1466.52	1.54471	4.58252e-13	Osbpl5	oxysterol binding protein-like 5 [Source:MGI Symbol;Acc:MGI:1930265]
ENSMUSG00000079487	3533.6	3621.78	3271.48	3082.94	1917.1	2061.7	2148.02	2120.98	2061.95	3377.45	0.712178	4.76445e-13	Med12	mediator complex subunit 12 [Source:MGI Symbol;Acc:MGI:1926212]
ENSMUSG00000023176	359.003	285.069	255.994	430.543	870.817	749.52	959.559	821.683	850.395	332.652	-1.35514	6.2687e-13	Cpn2	carboxypeptidase N, polypeptide 2 [Source:MGI Symbol;Acc:MGI:1919006]
ENSMUSG00000047875	366.786	381.339	541.216	358.262	178.248	164.936	155.654	160.715	164.888	411.901	1.32035	6.63015e-13	Gpr157	G protein-coupled receptor 157 [Source:MGI Symbol;Acc:MGI:2442046]
ENSMUSG00000069255	1755.13	1791.73	1527.9	1587.04	930.233	1058.51	927.513	877.141	948.35	1665.45	0.812563	6.65419e-13	Dusp22	dual specificity phosphatase 22 [Source:MGI Symbol;Acc:MGI:1915926]
ENSMUSG00000027359	17633.9	14964.7	14211.7	17149.4	7690.67	9006.77	6347.01	8217.96	7815.6	15990	1.03281	6.89439e-13	Slc27a2	solute carrier family 27 (fatty acid transporter), member 2 [Source:MGI Symbol;Acc:MGI:1347099]
ENSMUSG00000025937	1430.17	1349.64	1327.34	1506.38	3339.37	3086.81	2298.18	3629.66	3088.51	1403.38	-1.13784	7.06803e-13	Lactb2	lactamase, beta 2 [Source:MGI Symbol;Acc:MGI:2442551]
ENSMUSG00000028917	1551.79	1689.85	1572.25	1794.45	730.632	649.306	783.762	975.607	784.827	1652.09	1.07451	7.12431e-13	Plekhm2	pleckstrin homology domain containing, family M (with RUN domain) member 2 [Source:MGI Symbol;Acc:MGI:1916832]
ENSMUSG00000030934	3016.99	2985.28	2951.99	2544.5	1560.6	1556.45	1769.87	1347.97	1558.72	2874.69	0.882598	7.82969e-13	Oat	ornithine aminotransferase [Source:MGI Symbol;Acc:MGI:97394]
ENSMUSG00000038975	2471.19	2374.96	2272.7	2366.41	1553.17	1620.13	1649.93	1551.69	1593.73	2371.31	0.573165	8.19783e-13	Rabggtb	Rab geranylgeranyl transferase, b subunit [Source:MGI Symbol;Acc:MGI:99537]
ENSMUSG00000031766	70.0493	39.2555	51.4004	47.1397	6.49863	3.1317	1.83122	4.52718	3.99718	51.9612	3.70242	8.6027e-13	Slc12a3	solute carrier family 12, member 3 [Source:MGI Symbol;Acc:MGI:108114]
ENSMUSG00000002341	3.89163	0.934654	1.00785	1.04755	57.5593	46.9755	37.54	83.7528	56.4569	1.72042	-5.02497	9.01804e-13	Ncan	neurocan [Source:MGI Symbol;Acc:MGI:104694]
ENSMUSG00000074918	454.348	408.444	387.015	501.776	751.985	917.588	940.331	989.188	899.773	437.896	-1.03888	9.2751e-13	Inafm2	InaF motif containing 2 [Source:MGI Symbol;Acc:MGI:1915354]
ENSMUSG00000027875	773.462	549.576	374.92	1072.69	105.835	163.892	172.135	149.397	147.815	692.662	2.22851	1.00092e-12	Hmgcs2	3-hydroxy-3-methylglutaryl-Coenzyme A synthase 2 [Source:MGI Symbol;Acc:MGI:101939]
ENSMUSG00000074794	2483.83	3089.97	4659.29	2128.62	895.883	1053.3	802.074	600.983	838.059	3090.43	1.88249	1.0057e-12	Arrdc3	arrestin domain containing 3 [Source:MGI Symbol;Acc:MGI:2145242]
ENSMUSG00000054499	1685.08	1242.15	1217.48	1170.11	596.946	598.155	688.539	587.401	617.76	1328.71	1.1046	1.09893e-12	Dedd2	death effector domain-containing DNA binding protein 2 [Source:MGI Symbol;Acc:MGI:1914629]
ENSMUSG00000038422	87.5617	90.6614	71.5574	100.565	202.386	243.229	326.873	364.438	284.231	87.5863	-1.69741	1.09893e-12	Hdhd3	haloacid dehalogenase-like hydrolase domain containing 3 [Source:MGI Symbol;Acc:MGI:1919998]
ENSMUSG00000025757	562.341	451.438	375.928	469.302	1809.41	1159.77	1150.92	1084.26	1301.09	464.752	-1.48544	1.21092e-12	Hspa4l	heat shock protein 4 like [Source:MGI Symbol;Acc:MGI:107422]
ENSMUSG00000006732	342.463	339.279	351.74	383.403	176.391	192.078	189.531	194.669	188.167	354.221	0.913207	1.24643e-12	Mettl1	methyltransferase like 1 [Source:MGI Symbol;Acc:MGI:1339986]
ENSMUSG00000041577	1509.95	1756.21	1401.92	2526.69	4428.35	5840.62	4638.48	6944.69	5463.04	1798.69	-1.60276	1.30019e-12	Prelp	proline arginine-rich end leucine-rich repeat [Source:MGI Symbol;Acc:MGI:2151110]
ENSMUSG00000089736	239.335	262.638	302.355	273.41	96.5511	114.829	94.3078	136.947	110.659	269.435	1.28937	1.37187e-12	Tgfbr3l	transforming growth factor, beta receptor III-like [Source:MGI Symbol;Acc:MGI:3833469]
ENSMUSG00000039496	534.126	544.903	560.365	573.01	324.003	343.443	311.307	290.871	317.406	553.101	0.800265	1.39375e-12	Cdnf	cerebral dopamine neurotrophic factor [Source:MGI Symbol;Acc:MGI:3606576]
ENSMUSG00000024440	40.8621	77.5763	65.5103	82.7564	362.067	209.824	213.337	383.678	292.226	66.6763	-2.13196	1.39375e-12	Pcdh12	protocadherin 12 [Source:MGI Symbol;Acc:MGI:1855700]
ENSMUSG00000028150	3124.01	2662.83	2904.62	3397.2	912.594	1620.13	1001.68	1055.96	1147.59	3022.17	1.39725	1.49221e-12	Rorc	RAR-related orphan receptor gamma [Source:MGI Symbol;Acc:MGI:104856]
ENSMUSG00000028479	1052.69	1270.19	1162.05	1164.88	674.001	706.72	656.492	577.215	653.607	1162.45	0.830102	1.69496e-12	Gne	glucosamine (UDP-N-acetyl)-2-epimerase/N-acetylmannosamine kinase [Source:MGI Symbol;Acc:MGI:1354951]
ENSMUSG00000021453	18065.9	11767.3	14379	9610.22	3774.78	5480.47	4510.29	3047.92	4203.37	13455.6	1.67856	1.72867e-12	Gadd45g	growth arrest and DNA-damage-inducible 45 gamma [Source:MGI Symbol;Acc:MGI:1346325]
ENSMUSG00000002833	1662.7	1958.1	1900.81	1610.08	912.594	1043.9	1023.65	1057.1	1009.31	1782.92	0.821453	1.78271e-12	Hdgfl2	HDGF like 2 [Source:MGI Symbol;Acc:MGI:1194492]
ENSMUSG00000024972	1196.68	1000.08	857.681	1588.09	2827.83	3575.36	2790.78	3334.27	3132.06	1160.63	-1.43231	1.81211e-12	Lgals12	lectin, galactose binding, soluble 12 [Source:MGI Symbol;Acc:MGI:1929094]
ENSMUSG00000033768	203.338	218.709	239.868	150.847	33.4215	75.1608	54.9366	53.1943	54.1783	203.191	1.91166	1.81851e-12	Nrxn2	neurexin II [Source:MGI Symbol;Acc:MGI:1096362]
ENSMUSG00000018474	925.235	1036.53	1114.68	1338.77	2373.86	2381.14	2656.18	3663.62	2768.7	1103.8	-1.3267	1.89353e-12	Chd3	chromodomain helicase DNA binding protein 3 [Source:MGI Symbol;Acc:MGI:1344395]
ENSMUSG00000083282	2683.28	2914.25	2620.41	2372.7	1200.39	1582.55	1493.36	1379.66	1413.99	2647.66	0.905218	1.90482e-12	Ctsf	cathepsin F [Source:MGI Symbol;Acc:MGI:1861434]
ENSMUSG00000034614	1167.49	1430.02	1363.62	598.151	264.587	200.429	292.995	102.993	215.251	1139.82	2.40283	2.10373e-12	Pik3ip1	phosphoinositide-3-kinase interacting protein 1 [Source:MGI Symbol;Acc:MGI:1917016]
ENSMUSG00000026576	753.03	632.761	931.254	666.242	312.863	376.848	325.957	330.484	336.538	745.822	1.14841	2.10373e-12	Atp1b1	ATPase, Na+/K+ transporting, beta 1 polypeptide [Source:MGI Symbol;Acc:MGI:88108]
ENSMUSG00000049303	114.803	150.479	163.272	140.372	342.571	409.209	602.471	363.306	429.389	142.231	-1.59503	2.10373e-12	Syt12	synaptotagmin XII [Source:MGI Symbol;Acc:MGI:2159601]
ENSMUSG00000016496	607.094	1001.95	722.629	622.245	1966.3	1766.28	1617.88	2153.8	1876.07	738.479	-1.3445	2.18846e-12	Cd274	CD274 antigen [Source:MGI Symbol;Acc:MGI:1926446]
ENSMUSG00000055782	734.545	442.091	440.431	648.433	1590.31	1961.49	1492.44	1335.52	1594.94	566.375	-1.4939	2.29864e-12	Abcd2	ATP-binding cassette, sub-family D (ALD), member 2 [Source:MGI Symbol;Acc:MGI:1349467]
ENSMUSG00000020023	3840.07	4534.94	4545.41	3691.57	2108.34	2180.71	1973.14	1478.12	1935.08	4152.99	1.10149	2.68947e-12	Tmcc3	transmembrane and coiled coil domains 3 [Source:MGI Symbol;Acc:MGI:2442900]
ENSMUSG00000025068	3873.15	3974.15	3648.42	3550.15	2056.35	2476.13	2401.64	2213.79	2286.98	3761.46	0.717977	2.78998e-12	Gsto1	glutathione S-transferase omega 1 [Source:MGI Symbol;Acc:MGI:1342273]
ENSMUSG00000072949	2600.58	2276.82	1753.66	3219.12	199.601	497.94	639.096	647.386	496.006	2462.54	2.31216	3.06143e-12	Acot1	acyl-CoA thioesterase 1 [Source:MGI Symbol;Acc:MGI:1349396]
ENSMUSG00000061100	74.9139	85.0535	61.4789	53.425	249.733	355.97	287.501	161.847	263.763	68.7178	-1.93917	3.45869e-12	Retnla	resistin like alpha [Source:MGI Symbol;Acc:MGI:1888504]
ENSMUSG00000027931	2254.23	2126.34	2040.9	2318.23	1176.25	1224.49	1047.46	1400.03	1212.06	2184.92	0.850897	3.47853e-12	Npr1	natriuretic peptide receptor 1 [Source:MGI Symbol;Acc:MGI:97371]
ENSMUSG00000008393	2631.71	2912.38	2850.2	3013.8	4281.67	4998.19	4940.63	5541.27	4940.44	2852.02	-0.792514	3.55715e-12	Carhsp1	calcium regulated heat stable protein 1 [Source:MGI Symbol;Acc:MGI:1196368]
ENSMUSG00000079012	73.941	68.2297	65.5103	60.7579	17.6391	11.4829	15.5654	6.79077	12.8695	67.1097	2.35966	3.80881e-12	Serpina3m	serine (or cysteine) peptidase inhibitor, clade A, member 3M [Source:MGI Symbol;Acc:MGI:98378]
ENSMUSG00000022485	120.641	164.499	161.256	171.798	304.507	363.277	362.582	416.5	361.717	154.548	-1.22612	3.80881e-12	Hoxc5	homeobox C5 [Source:MGI Symbol;Acc:MGI:96196]
ENSMUSG00000023055	4100.81	3912.46	4619.99	4366.19	2077.71	2443.77	2523.42	2638.21	2420.78	4249.86	0.81213	3.9102e-12	Calcoco1	calcium binding and coiled coil domain 1 [Source:MGI Symbol;Acc:MGI:1914738]
ENSMUSG00000006301	5003.66	5242.47	6963.24	4077.06	1681.29	1813.25	2594.84	1825.58	1978.74	5321.61	1.42714	3.92259e-12	Tmbim1	transmembrane BAX inhibitor motif containing 1 [Source:MGI Symbol;Acc:MGI:1916910]
ENSMUSG00000018076	1639.35	1614.15	1557.13	1552.47	1057.42	1100.27	1071.26	997.111	1056.52	1590.77	0.59016	4.19395e-12	Med13l	mediator complex subunit 13-like [Source:MGI Symbol;Acc:MGI:2670178]
ENSMUSG00000039270	850.321	707.533	578.506	689.288	1540.18	1432.23	1313.9	1364.94	1412.81	706.412	-0.999816	4.21345e-12	Megf9	multiple EGF-like-domains 9 [Source:MGI Symbol;Acc:MGI:1918264]
ENSMUSG00000086290	454.348	512.19	577.498	461.969	203.314	231.746	279.261	219.568	233.472	501.501	1.10197	4.39666e-12	Snhg12	small nucleolar RNA host gene 12 [Source:MGI Symbol;Acc:MGI:1916721]
ENSMUSG00000040213	2756.25	2427.3	2516.6	2174.71	1270.95	1443.71	1496.11	1232.52	1360.82	2468.71	0.859094	4.68773e-12	Kyat3	kynurenine aminotransferase 3 [Source:MGI Symbol;Acc:MGI:2677849]
ENSMUSG00000028138	4267.17	3637.67	3470.03	3766.99	2035	2348.77	2345.79	2098.35	2206.98	3785.47	0.778362	4.71782e-12	Adh5	alcohol dehydrogenase 5 (class III), chi polypeptide [Source:MGI Symbol;Acc:MGI:87929]
ENSMUSG00000017167	295.764	487.889	479.737	590.818	1189.25	1160.82	1306.58	1573.19	1307.46	463.552	-1.49615	4.71782e-12	Cntnap1	contactin associated protein-like 1 [Source:MGI Symbol;Acc:MGI:1858201]
ENSMUSG00000022814	1285.21	1015.03	860.704	644.243	349.069	376.848	283.839	305.584	328.835	951.298	1.53293	5.22772e-12	Umps	uridine monophosphate synthetase [Source:MGI Symbol;Acc:MGI:1298388]
ENSMUSG00000022946	1067.28	1394.5	1397.89	1392.19	661.004	652.437	580.497	750.38	661.079	1312.97	0.990721	6.29637e-12	Dopey2	dopey family member 2 [Source:MGI Symbol;Acc:MGI:1917278]
ENSMUSG00000021273	12633.2	9822.28	10930.1	8970.17	3577.03	5139.12	3064.55	2441.28	3555.49	10588.9	1.57442	6.70924e-12	Fdft1	farnesyl diphosphate farnesyl transferase 1 [Source:MGI Symbol;Acc:MGI:102706]
ENSMUSG00000020387	459.212	603.786	530.129	525.87	293.367	286.029	260.033	263.708	275.784	529.749	0.941749	6.89712e-12	Jade2	jade family PHD finger 2 [Source:MGI Symbol;Acc:MGI:1924151]
ENSMUSG00000026193	281.17	329.933	292.277	187.511	976.652	761.003	618.952	699.449	764.014	272.723	-1.4854	7.07349e-12	Fn1	fibronectin 1 [Source:MGI Symbol;Acc:MGI:95566]
ENSMUSG00000003500	18213.8	23608.4	21282.8	12271	5238.83	8194.61	5981.68	6683.25	6524.59	18844	1.53021	7.5247e-12	Impdh1	inosine monophosphate dehydrogenase 1 [Source:MGI Symbol;Acc:MGI:96567]
ENSMUSG00000030246	21335.9	19867	19832.5	18873.7	12505.2	14034.2	13237	13592.9	13342.3	19977.3	0.582408	8.38152e-12	Ldhb	lactate dehydrogenase B [Source:MGI Symbol;Acc:MGI:96763]
ENSMUSG00000060568	55.4557	62.6218	67.526	65.9956	218.168	157.629	156.569	268.235	200.15	62.8998	-1.66869	8.79827e-12	Fam78b	family with sequence similarity 78, member B [Source:MGI Symbol;Acc:MGI:2443050]
ENSMUSG00000064337	37216.6	44359.6	40751.4	41453.6	60669.4	65926.5	72519	66990.9	66526.4	40945.3	-0.700227	8.84308e-12	mt-Rnr1	mitochondrially encoded 12S rRNA [Source:MGI Symbol;Acc:MGI:102493]
ENSMUSG00000022871	163.448	149.545	125.981	275.506	46.4188	32.3609	22.8902	45.2718	36.7354	178.62	2.28436	9.10877e-12	Fetub	fetuin beta [Source:MGI Symbol;Acc:MGI:1890221]
ENSMUSG00000028359	190.69	197.212	242.892	206.367	479.042	424.867	564.016	394.996	465.73	209.29	-1.15598	9.10877e-12	Orm3	orosomucoid 3 [Source:MGI Symbol;Acc:MGI:97445]
ENSMUSG00000024424	340.518	247.683	203.586	200.082	64.058	69.9413	46.6961	21.5041	50.5499	247.967	2.28977	9.14873e-12	Ttc39c	tetratricopeptide repeat domain 39C [Source:MGI Symbol;Acc:MGI:1919997]
ENSMUSG00000024713	2293.14	1796.4	1259.81	1330.39	453.048	384.155	689.454	338.407	466.266	1669.94	1.83962	9.14873e-12	Pcsk5	proprotein convertase subtilisin/kexin type 5 [Source:MGI Symbol;Acc:MGI:97515]
ENSMUSG00000031023	565.259	598.178	564.396	575.105	288.725	307.95	357.088	259.181	303.236	575.735	0.92283	9.28462e-12	Akip1	A kinase (PRKA) interacting protein 1 [Source:MGI Symbol;Acc:MGI:3041226]
ENSMUSG00000024065	409.594	767.351	588.585	435.781	191.245	192.078	115.367	156.188	163.719	550.328	1.74999	9.85979e-12	Ehd3	EH-domain containing 3 [Source:MGI Symbol;Acc:MGI:1928900]
ENSMUSG00000028076	2614.2	2315.14	2292.86	2744.58	4047.72	4176.64	5130.16	4576.98	4482.88	2491.7	-0.847416	1.07295e-11	Cd1d1	CD1d1 antigen [Source:MGI Symbol;Acc:MGI:107674]
ENSMUSG00000032193	72.9681	81.3149	141.099	89.0417	375.992	247.404	440.408	629.278	423.271	96.1059	-2.13907	1.13957e-11	Ldlr	low density lipoprotein receptor [Source:MGI Symbol;Acc:MGI:96765]
ENSMUSG00000011148	2985.85	2349.72	3550.66	2294.13	1067.63	1291.3	1025.48	1347.97	1183.1	2795.09	1.24076	1.21078e-11	Adssl1	adenylosuccinate synthetase like 1 [Source:MGI Symbol;Acc:MGI:87947]
ENSMUSG00000028838	83.6701	121.505	109.856	114.183	19.4959	3.1317	24.7215	10.1861	14.3838	107.303	2.87717	1.29325e-11	Extl1	exostoses (multiple)-like 1 [Source:MGI Symbol;Acc:MGI:1888742]
ENSMUSG00000004040	2889.54	3671.32	3958.84	3779.56	2073.06	1632.66	1743.32	1884.44	1833.37	3574.81	0.963251	1.33662e-11	Stat3	signal transducer and activator of transcription 3 [Source:MGI Symbol;Acc:MGI:103038]
ENSMUSG00000026582	234.471	210.297	194.515	215.795	57.5593	66.8096	47.6117	16.9769	47.2394	213.77	2.17143	1.34466e-11	Sele	selectin, endothelial cell [Source:MGI Symbol;Acc:MGI:98278]
ENSMUSG00000022426	4038.54	3978.82	3692.76	3690.52	1984.87	2392.62	2067.45	2513.72	2239.66	3850.16	0.782178	1.43905e-11	Josd1	Josephin domain containing 1 [Source:MGI Symbol;Acc:MGI:1921408]
ENSMUSG00000032092	1247.27	1212.25	1175.15	1526.28	606.23	734.906	694.032	718.689	688.464	1290.24	0.906509	1.48424e-11	Mpzl2	myelin protein zero-like 2 [Source:MGI Symbol;Acc:MGI:1289160]
ENSMUSG00000036446	142.045	111.224	87.683	46.0922	552.384	503.16	307.645	387.074	437.566	96.7609	-2.17503	1.60178e-11	Lum	lumican [Source:MGI Symbol;Acc:MGI:109347]
ENSMUSG00000029190	1814.47	1396.37	1503.71	1636.27	2611.52	2859.24	2712.95	2674.43	2714.54	1587.71	-0.773826	1.61708e-11	D5Ertd579e	DNA segment, Chr 5, ERATO Doi 579, expressed [Source:MGI Symbol;Acc:MGI:1261849]
ENSMUSG00000038624	38.9163	28.0396	26.2041	38.7593	106.763	89.7754	114.451	132.42	110.852	32.9798	-1.74971	1.65634e-11	Nepn	nephrocan [Source:MGI Symbol;Acc:MGI:1913900]
ENSMUSG00000073433	216.958	207.493	213.664	238.841	89.1241	68.8974	33.8776	58.8533	62.6881	219.239	1.80648	1.67957e-11	Arhgdig	Rho GDP dissociation inhibitor (GDI) gamma [Source:MGI Symbol;Acc:MGI:108430]
ENSMUSG00000030546	12248.9	13714.2	13570.7	18624.4	28171.6	31751.3	32679	41524.4	33531.6	14539.5	-1.20554	1.73955e-11	Plin1	perilipin 1 [Source:MGI Symbol;Acc:MGI:1890505]
ENSMUSG00000055799	501.047	485.085	567.42	593.961	193.102	266.194	225.24	292.003	244.135	536.878	1.13957	1.86717e-11	Tcf7l1	transcription factor 7 like 1 (T cell specific, HMG box) [Source:MGI Symbol;Acc:MGI:1202876]
ENSMUSG00000029416	661.577	795.39	809.304	570.915	362.995	355.97	334.198	305.584	339.687	709.296	1.06183	1.87192e-11	Slc15a4	solute carrier family 15, member 4 [Source:MGI Symbol;Acc:MGI:2140796]
ENSMUSG00000058486	2185.15	1581.43	1402.93	1114.59	663.789	542.828	578.665	591.928	594.303	1571.03	1.40243	2.05274e-11	Wdr91	WD repeat domain 91 [Source:MGI Symbol;Acc:MGI:2141558]
ENSMUSG00000031167	3240.76	2666.57	2504.51	3309.21	1631.16	1636.84	1653.59	1585.64	1626.81	2930.26	0.848833	2.15011e-11	Rbm3	RNA binding motif (RNP1, RRM) protein 3 [Source:MGI Symbol;Acc:MGI:1099460]
ENSMUSG00000019278	1436.98	1216.92	1498.67	1348.2	785.406	853.91	694.032	794.52	781.967	1375.19	0.814891	2.22485e-11	Dpep1	dipeptidase 1 (renal) [Source:MGI Symbol;Acc:MGI:94917]
ENSMUSG00000039886	1706.48	1482.36	1777.85	1928.54	2784.2	4169.34	3646.87	4095.96	3674.09	1723.81	-1.09176	2.35034e-11	Tmem120a	transmembrane protein 120A [Source:MGI Symbol;Acc:MGI:2686991]
ENSMUSG00000062867	811.405	1016.9	987.693	799.28	496.681	496.896	449.564	504.78	486.981	903.821	0.892987	2.3683e-11	Impdh2	inosine monophosphate dehydrogenase 2 [Source:MGI Symbol;Acc:MGI:109367]
ENSMUSG00000044338	40.8621	70.099	62.4867	33.5216	365.78	183.726	174.881	226.359	237.687	51.7424	-2.19789	2.41047e-11	Aplnr	apelin receptor [Source:MGI Symbol;Acc:MGI:1346086]
ENSMUSG00000038520	1616.97	1730.98	1624.65	1506.38	900.525	900.886	1038.3	1057.1	974.202	1619.75	0.733933	2.4655e-11	Tbc1d17	TBC1 domain family, member 17 [Source:MGI Symbol;Acc:MGI:2449973]
ENSMUSG00000041775	1727.88	2074	1919.96	1615.32	925.591	767.266	782.846	503.648	744.838	1834.29	1.29933	2.49376e-11	Mapk1ip1	mitogen-activated protein kinase 1 interacting protein 1 [Source:MGI Symbol;Acc:MGI:1916796]
ENSMUSG00000029716	22.3769	19.6277	19.1492	42.9495	116.975	86.6437	181.291	172.033	139.236	26.0258	-2.42494	2.94716e-11	Tfr2	transferrin receptor 2 [Source:MGI Symbol;Acc:MGI:1354956]
ENSMUSG00000042129	1675.35	1486.1	1251.75	1265.44	665.646	463.492	412.94	280.685	455.691	1419.66	1.63832	3.52763e-11	Rassf4	Ras association (RalGDS/AF-6) domain family member 4 [Source:MGI Symbol;Acc:MGI:2386853]
ENSMUSG00000037104	392.082	362.646	390.038	383.403	626.654	644.086	736.15	611.169	654.515	382.042	-0.777796	3.62058e-11	Socs5	suppressor of cytokine signaling 5 [Source:MGI Symbol;Acc:MGI:2385459]
ENSMUSG00000036304	347.328	293.481	384.999	313.217	134.615	51.1511	88.8142	50.9307	81.3776	334.756	2.03388	3.78699e-11	Zdhhc23	zinc finger, DHHC domain containing 23 [Source:MGI Symbol;Acc:MGI:2685625]
ENSMUSG00000030495	279.224	282.265	241.884	244.079	487.397	437.394	465.13	465.167	463.772	261.863	-0.823904	3.78699e-11	Slc7a10	solute carrier family 7 (cationic amino acid transporter, y+ system), member 10 [Source:MGI Symbol;Acc:MGI:1858261]
ENSMUSG00000022564	15068.4	18523	17942.8	15361.3	6934.97	9094.46	9821.75	8519.02	8592.55	16723.8	0.960766	3.86647e-11	Grina	glutamate receptor, ionotropic, N-methyl D-aspartate-associated protein 1 (glutamate binding) [Source:MGI Symbol;Acc:MGI:1913418]
ENSMUSG00000026313	810.432	653.323	551.294	496.539	229.309	245.316	292.08	278.421	261.282	627.897	1.26555	4.00676e-11	Hdac4	histone deacetylase 4 [Source:MGI Symbol;Acc:MGI:3036234]
ENSMUSG00000013846	2585.99	3114.27	2666.77	2867.14	1529.04	1681.72	1154.58	1343.44	1427.2	2808.54	0.976827	4.00676e-11	St3gal1	ST3 beta-galactoside alpha-2,3-sialyltransferase 1 [Source:MGI Symbol;Acc:MGI:98304]
ENSMUSG00000023078	529.262	553.315	356.779	314.265	147.612	72.0291	68.6707	38.481	81.6982	438.405	2.41964	4.10186e-11	Cxcl13	chemokine (C-X-C motif) ligand 13 [Source:MGI Symbol;Acc:MGI:1888499]
ENSMUSG00000027075	1005.01	1085.13	1197.33	818.136	423.34	459.316	345.185	233.15	365.248	1026.4	1.48976	4.23191e-11	Slc43a1	solute carrier family 43, member 1 [Source:MGI Symbol;Acc:MGI:1931352]
ENSMUSG00000045620	47.6725	57.0139	30.2355	69.1383	200.529	218.175	134.595	265.972	204.818	51.015	-2.00411	4.25527e-11	Odf3l1	outer dense fiber of sperm tails 3-like 1 [Source:MGI Symbol;Acc:MGI:2681875]
ENSMUSG00000028274	230.579	254.226	254.986	287.029	473.472	479.15	523.729	427.818	476.042	256.705	-0.892895	4.29019e-11	Rngtt	RNA guanylyltransferase and 5'-phosphatase [Source:MGI Symbol;Acc:MGI:1329041]
ENSMUSG00000079037	1045.88	1099.15	1204.38	1166.97	1818.69	2059.61	2664.42	2209.26	2188	1129.1	-0.954626	4.73368e-11	Prnp	prion protein [Source:MGI Symbol;Acc:MGI:97769]
ENSMUSG00000045573	128.424	117.766	132.028	81.7089	26.9229	37.5804	39.3712	27.1631	32.7594	114.982	1.80954	4.88309e-11	Penk	preproenkephalin [Source:MGI Symbol;Acc:MGI:104629]
ENSMUSG00000003534	107.993	103.747	114.895	111.04	248.805	232.79	206.012	297.662	246.317	109.419	-1.16885	5.22448e-11	Ddr1	discoidin domain receptor family, member 1 [Source:MGI Symbol;Acc:MGI:99216]
ENSMUSG00000057421	2523.72	1973.05	2027.8	1853.12	1114.05	1191.09	1203.11	1154.43	1165.67	2094.42	0.845491	5.51642e-11	Las1l	LAS1-like (S. cerevisiae) [Source:MGI Symbol;Acc:MGI:1923380]
ENSMUSG00000034235	603.203	515.929	400.117	348.834	174.535	177.463	182.206	115.443	162.412	467.021	1.52197	5.95339e-11	Usp54	ubiquitin specific peptidase 54 [Source:MGI Symbol;Acc:MGI:1926037]
ENSMUSG00000033161	3370.15	3823.67	3605.08	3896.89	2306.09	2001.16	2004.27	2436.75	2187.07	3673.95	0.748533	6.10992e-11	Atp1a1	ATPase, Na+/K+ transporting, alpha 1 polypeptide [Source:MGI Symbol;Acc:MGI:88105]
ENSMUSG00000030126	1561.52	1298.23	1223.53	1063.26	448.406	367.453	678.467	431.214	481.385	1286.64	1.41742	6.11824e-11	Tmcc1	transmembrane and coiled coil domains 1 [Source:MGI Symbol;Acc:MGI:2442368]
ENSMUSG00000050737	108.966	81.3149	105.824	99.5172	309.149	231.746	204.181	331.616	269.173	98.9055	-1.444	6.32378e-11	Ptges	prostaglandin E synthase [Source:MGI Symbol;Acc:MGI:1927593]
ENSMUSG00000026888	349.274	267.311	183.429	266.078	791.905	797.54	543.872	848.846	745.541	266.523	-1.48321	6.32378e-11	Grb14	growth factor receptor bound protein 14 [Source:MGI Symbol;Acc:MGI:1355324]
ENSMUSG00000050390	378.461	414.052	460.588	378.165	165.251	157.629	175.797	237.677	184.088	407.816	1.15069	6.66115e-11	C77080	expressed sequence C77080 [Source:MGI Symbol;Acc:MGI:2140651]
ENSMUSG00000002103	700.493	761.743	731.699	774.139	1103.84	1143.07	1240.65	1126.14	1153.42	742.019	-0.636782	6.70214e-11	Acp2	acid phosphatase 2, lysosomal [Source:MGI Symbol;Acc:MGI:87882]
ENSMUSG00000005667	501.047	619.675	402.132	831.755	219.097	128.4	85.1517	140.342	143.248	588.652	2.03843	6.78074e-11	Mthfd2	methylenetetrahydrofolate dehydrogenase (NAD+ dependent), methenyltetrahydrofolate cyclohydrolase [Source:MGI Symbol;Acc:MGI:1338850]
ENSMUSG00000024998	94.372	92.5307	77.6045	82.7564	215.383	244.273	289.333	170.901	229.972	86.8159	-1.40664	7.01876e-11	Plce1	phospholipase C, epsilon 1 [Source:MGI Symbol;Acc:MGI:1921305]
ENSMUSG00000002769	336.626	394.424	525.09	302.742	87.2674	146.146	154.738	115.443	125.899	389.72	1.63021	7.28014e-11	Gnmt	glycine N-methyltransferase [Source:MGI Symbol;Acc:MGI:1202304]
ENSMUSG00000068686	128.424	137.394	110.864	106.85	235.808	282.897	241.721	301.057	265.371	120.883	-1.13033	7.28014e-11	Cd59b	CD59b antigen [Source:MGI Symbol;Acc:MGI:1888996]
ENSMUSG00000001348	1695.78	1838.46	1970.35	1926.44	2799.05	3185.98	3743.93	3315.03	3261	1857.76	-0.811841	7.28027e-11	Acp5	acid phosphatase 5, tartrate resistant [Source:MGI Symbol;Acc:MGI:87883]
ENSMUSG00000027762	6.81035	12.1505	12.0942	11.523	69.6282	72.0291	62.2615	39.6128	60.8829	10.6445	-2.52048	7.77036e-11	Sucnr1	succinate receptor 1 [Source:MGI Symbol;Acc:MGI:1934135]
ENSMUSG00000001119	918.425	970.171	818.375	1026.6	2934.6	2201.58	1562.95	2748	2361.78	933.392	-1.33921	8.28347e-11	Col6a1	collagen, type VI, alpha 1 [Source:MGI Symbol;Acc:MGI:88459]
ENSMUSG00000020780	1542.06	1503.86	1763.74	1591.23	981.294	1025.11	1050.2	1053.7	1027.58	1600.22	0.639063	8.4604e-11	Srp68	signal recognition particle 68 [Source:MGI Symbol;Acc:MGI:1917447]
ENSMUSG00000029475	479.643	484.151	414.227	386.546	242.306	230.702	234.396	245.599	238.251	441.142	0.889873	8.70082e-11	Kdm2b	lysine (K)-specific demethylase 2B [Source:MGI Symbol;Acc:MGI:1354737]
ENSMUSG00000032911	621.688	813.149	826.437	830.707	1841.9	2062.75	1540.06	3089.8	2133.62	772.995	-1.46447	8.88038e-11	Cspg4	chondroitin sulfate proteoglycan 4 [Source:MGI Symbol;Acc:MGI:2153093]
ENSMUSG00000034981	2339.84	2159.98	1694.2	2462.79	7136.43	5243.51	4133.06	8633.33	6286.58	2164.2	-1.53837	9.48444e-11	Parm1	prostate androgen-regulated mucin-like protein 1 [Source:MGI Symbol;Acc:MGI:2443349]
ENSMUSG00000078515	2633.66	2616.1	2481.33	2221.85	1507.68	1409.26	1660.92	1359.29	1484.29	2488.23	0.744945	1.00795e-10	Ddi2	DNA-damage inducible protein 2 [Source:MGI Symbol;Acc:MGI:1917244]
ENSMUSG00000021477	5240.08	5064.89	5814.29	4761.11	3394.14	3197.47	3185.41	2778.56	3138.89	5220.09	0.733597	1.03459e-10	Ctsl	cathepsin L [Source:MGI Symbol;Acc:MGI:88564]
ENSMUSG00000012114	1284.24	1302.91	1394.86	1256.01	857.82	770.398	814.893	898.645	835.439	1309.51	0.648772	1.04627e-10	Med15	mediator complex subunit 15 [Source:MGI Symbol;Acc:MGI:2137379]
ENSMUSG00000071637	865.888	694.448	1050.18	641.1	298.009	218.175	304.898	134.684	238.941	812.904	1.76396	1.11606e-10	Cebpd	CCAAT/enhancer binding protein (C/EBP), delta [Source:MGI Symbol;Acc:MGI:103573]
ENSMUSG00000052957	3979.19	2682.46	2309.99	2061.58	1011.93	1000.06	1022.74	1213.28	1062	2758.3	1.37728	1.19582e-10	Gas1	growth arrest specific 1 [Source:MGI Symbol;Acc:MGI:95655]
ENSMUSG00000028245	1737.61	1382.35	1491.62	1394.29	870.817	902.973	925.682	817.156	879.157	1501.47	0.771828	1.24628e-10	Nsmaf	neutral sphingomyelinase (N-SMase) activation associated factor [Source:MGI Symbol;Acc:MGI:1341864]
ENSMUSG00000042246	139.126	153.283	103.809	130.944	22.281	29.2292	51.2742	39.6128	35.5993	131.79	1.88843	1.25401e-10	Tmc7	transmembrane channel-like gene family 7 [Source:MGI Symbol;Acc:MGI:2443317]
ENSMUSG00000026380	88.5346	88.7921	101.793	55.5201	7.42701	17.7463	13.7341	1.13179	10.0098	83.6599	3.0495	1.33021e-10	Tfcp2l1	transcription factor CP2-like 1 [Source:MGI Symbol;Acc:MGI:2444691]
ENSMUSG00000042429	1245.32	1443.11	1459.37	1450.86	2252.24	2242.3	2854.87	2454.86	2451.07	1399.66	-0.808526	1.33021e-10	Adora1	adenosine A1 receptor [Source:MGI Symbol;Acc:MGI:99401]
ENSMUSG00000020448	1496.33	1560.87	1399.9	1722.17	808.616	752.652	959.559	930.335	862.79	1544.82	0.840262	1.3553e-10	Rnf185	ring finger protein 185 [Source:MGI Symbol;Acc:MGI:1922078]
ENSMUSG00000041075	247.119	319.652	293.284	362.452	663.789	579.364	561.269	684.736	622.289	305.627	-1.026	1.37129e-10	Fzd7	frizzled class receptor 7 [Source:MGI Symbol;Acc:MGI:108570]
ENSMUSG00000041313	320.087	226.186	203.586	273.41	104.907	92.9071	70.502	108.652	94.242	255.817	1.44337	1.45502e-10	Slc7a1	solute carrier family 7 (cationic amino acid transporter, y+ system), member 1 [Source:MGI Symbol;Acc:MGI:88117]
ENSMUSG00000041679	242.254	214.97	195.523	234.651	85.4106	98.1266	119.029	97.3343	99.9752	221.85	1.1486	1.56519e-10	Lrrc29	leucine rich repeat containing 29 [Source:MGI Symbol;Acc:MGI:2443262]
ENSMUSG00000037697	2608.37	2506.74	2215.26	1909.68	1345.22	1217.19	1244.31	1044.65	1212.84	2310.01	0.92919	1.59081e-10	Ddhd1	DDHD domain containing 1 [Source:MGI Symbol;Acc:MGI:2150302]
ENSMUSG00000022453	1026.42	1158.97	1075.38	1100.97	580.235	716.115	665.648	685.867	661.967	1090.43	0.720998	1.86675e-10	Naga	N-acetyl galactosaminidase, alpha [Source:MGI Symbol;Acc:MGI:1261422]
ENSMUSG00000044018	1330.94	1217.85	1259.81	1408.95	1917.1	1956.27	1920.95	2024.78	1954.77	1304.39	-0.58371	1.93536e-10	Mrpl50	mitochondrial ribosomal protein L50 [Source:MGI Symbol;Acc:MGI:107329]
ENSMUSG00000021094	2646.31	2255.32	2609.32	2696.39	4231.54	3940.72	3851.97	4558.87	4145.77	2551.84	-0.700103	2.14677e-10	Dhrs7	dehydrogenase/reductase (SDR family) member 7 [Source:MGI Symbol;Acc:MGI:1913625]
ENSMUSG00000017386	650.875	673.885	895.979	649.481	1461.26	1706.78	1509.84	2452.6	1782.62	717.555	-1.31246	2.15321e-10	Traf4	TNF receptor associated factor 4 [Source:MGI Symbol;Acc:MGI:1202880]
ENSMUSG00000032350	1388.34	1267.39	1167.09	1229.82	743.629	632.603	815.808	643.991	709.008	1263.16	0.832086	2.18297e-10	Gclc	glutamate-cysteine ligase, catalytic subunit [Source:MGI Symbol;Acc:MGI:104990]
ENSMUSG00000026621	1222.94	885.117	1076.38	1422.57	359.282	390.419	153.822	391.601	323.781	1151.75	1.83182	2.1954e-10	44256	mitochondrial amidoxime reducing component 1 [Source:MGI Symbol;Acc:MGI:1913362]
ENSMUSG00000034832	526.343	621.545	567.42	540.536	949.729	851.822	902.791	934.862	909.801	563.961	-0.68959	2.28988e-10	Tet3	tet methylcytosine dioxygenase 3 [Source:MGI Symbol;Acc:MGI:2446229]
ENSMUSG00000027221	182.907	218.709	235.837	177.036	449.334	564.75	491.682	361.042	466.702	203.622	-1.19682	2.35963e-10	Chst1	carbohydrate (keratan sulfate Gal-6) sulfotransferase 1 [Source:MGI Symbol;Acc:MGI:1924219]
ENSMUSG00000059248	784.163	1248.7	1029.02	1436.19	2830.62	3205.82	2636.04	4964.05	3409.13	1124.52	-1.6	2.45414e-10	44448	septin 9 [Source:MGI Symbol;Acc:MGI:1858222]
ENSMUSG00000050549	113.83	151.414	130.013	155.037	292.438	256.799	278.345	289.739	279.331	137.574	-1.02229	2.50692e-10	Fam241a	family with sequence similarity 241, member A [Source:MGI Symbol;Acc:MGI:1917867]
ENSMUSG00000035104	560.395	430.875	359.803	230.461	101.193	120.048	138.257	117.707	119.301	395.383	1.72905	2.53651e-10	Eva1a	eva-1 homolog A (C. elegans) [Source:MGI Symbol;Acc:MGI:2385247]
ENSMUSG00000025509	108684	122699	114745	133904	52560	63285.4	69791.4	73591.5	64807.1	120008	0.888911	2.59072e-10	Pnpla2	patatin-like phospholipase domain containing 2 [Source:MGI Symbol;Acc:MGI:1914103]
ENSMUSG00000017707	10498.6	12038.3	12541.7	11685.4	7037.09	7037.97	7797.33	6060.76	6983.29	11691	0.743293	2.61601e-10	Serinc3	serine incorporator 3 [Source:MGI Symbol;Acc:MGI:1349457]
ENSMUSG00000026005	1226.84	1082.33	1206.4	1253.92	1833.54	1865.45	2001.52	1735.04	1858.89	1192.37	-0.64122	2.7155e-10	Rpe	ribulose-5-phosphate-3-epimerase [Source:MGI Symbol;Acc:MGI:1913896]
ENSMUSG00000041592	325.924	645.846	714.566	625.387	155.039	189.99	216.084	199.196	190.077	577.931	1.60447	2.86834e-10	Sdk2	sidekick cell adhesion molecule 2 [Source:MGI Symbol;Acc:MGI:2443847]
ENSMUSG00000048911	254.902	243.01	207.617	305.885	490.183	512.555	749.884	670.022	605.661	252.853	-1.26066	2.94192e-10	Rnf24	ring finger protein 24 [Source:MGI Symbol;Acc:MGI:1261771]
ENSMUSG00000028341	4009.35	3776.94	3366.22	2059.48	522.676	752.652	206.012	349.724	457.766	3303	2.85127	3.31773e-10	Nr4a3	nuclear receptor subfamily 4, group A, member 3 [Source:MGI Symbol;Acc:MGI:1352457]
ENSMUSG00000000901	145.936	162.63	199.554	133.039	64.9863	50.1072	59.5146	69.0395	60.9119	160.29	1.397	3.56889e-10	Mmp11	matrix metallopeptidase 11 [Source:MGI Symbol;Acc:MGI:97008]
ENSMUSG00000015837	11783.9	11354.2	12594.1	10647.3	5932.32	5014.9	6064.08	7529.83	6135.28	11594.9	0.918373	3.61609e-10	Sqstm1	sequestosome 1 [Source:MGI Symbol;Acc:MGI:107931]
ENSMUSG00000021270	2588.91	2735.73	2185.02	2535.07	8597.69	4500.25	5952.38	5403.19	6113.38	2511.18	-1.28367	3.65636e-10	Hsp90aa1	heat shock protein 90, alpha (cytosolic), class A member 1 [Source:MGI Symbol;Acc:MGI:96250]
ENSMUSG00000003477	1107.17	885.117	1193.29	509.109	104.907	225.482	298.489	112.048	185.231	923.672	2.31705	3.85192e-10	Inmt	indolethylamine N-methyltransferase [Source:MGI Symbol;Acc:MGI:102963]
ENSMUSG00000029022	623.634	580.42	732.707	666.242	405.7	338.224	348.847	366.701	364.868	650.751	0.833856	3.91215e-10	Miip	migration and invasion inhibitory protein [Source:MGI Symbol;Acc:MGI:106506]
ENSMUSG00000037461	387.217	400.966	342.669	373.975	628.511	617.989	691.285	804.706	685.623	376.207	-0.864686	3.9703e-10	Ints7	integrator complex subunit 7 [Source:MGI Symbol;Acc:MGI:1924315]
ENSMUSG00000006920	1903.01	1916.97	1876.62	1616.37	1210.6	1101.31	1203.11	1091.05	1151.52	1828.24	0.666584	4.47141e-10	Ezh1	enhancer of zeste 1 polycomb repressive complex 2 subunit [Source:MGI Symbol;Acc:MGI:1097695]
ENSMUSG00000026279	454.348	558.923	521.059	500.729	292.438	292.292	314.054	284.08	295.716	508.765	0.782117	4.79742e-10	Thap4	THAP domain containing 4 [Source:MGI Symbol;Acc:MGI:1914276]
ENSMUSG00000085795	1291.05	1566.48	1618.61	1119.83	2481.55	3565.96	2883.26	2853.25	2946.01	1398.99	-1.07413	4.87024e-10	Zfp703	zinc finger protein 703 [Source:MGI Symbol;Acc:MGI:2662729]
ENSMUSG00000004043	723.843	1040.27	1005.83	1042.31	1722.14	1786.11	1760.72	1871.99	1785.24	953.065	-0.905468	5.05405e-10	Stat5a	signal transducer and activator of transcription 5A [Source:MGI Symbol;Acc:MGI:103036]
ENSMUSG00000072825	391.109	441.157	394.07	541.583	205.171	187.902	210.59	245.599	212.316	441.98	1.05855	5.21859e-10	Cep170b	centrosomal protein 170B [Source:MGI Symbol;Acc:MGI:2145043]
ENSMUSG00000033159	2138.45	2042.22	1957.25	1884.54	1175.32	1104.45	1378.91	1277.8	1234.12	2005.61	0.700488	5.42828e-10	Cnppd1	cyclin Pas1/PHO80 domain containing 1 [Source:MGI Symbol;Acc:MGI:1916421]
ENSMUSG00000095789	202.365	272.919	235.837	222.081	99.3362	63.6779	110.789	65.6441	84.8618	233.3	1.45246	5.62987e-10	Nupr1l	nuclear protein transcriptional regulator 1 like [Source:MGI Symbol;Acc:MGI:1923099]
ENSMUSG00000029017	3434.36	3449.81	3274.51	3617.19	4696.65	4807.16	4969.93	5196.07	4917.45	3443.97	-0.51376	5.79227e-10	Pmpcb	peptidase (mitochondrial processing) beta [Source:MGI Symbol;Acc:MGI:1920328]
ENSMUSG00000034158	6354.06	5654.66	5413.16	5483.92	3174.12	2790.34	3634.06	2433.36	3007.97	5726.45	0.928539	5.86686e-10	Lrrc58	leucine rich repeat containing 58 [Source:MGI Symbol;Acc:MGI:2443542]
ENSMUSG00000040462	2635.61	2622.64	2708.09	2713.15	1834.47	1862.32	1923.7	2006.67	1906.79	2669.87	0.485851	6.17312e-10	Os9	amplified in osteosarcoma [Source:MGI Symbol;Acc:MGI:1924301]
ENSMUSG00000026819	922.316	2541.32	2126.56	945.937	161.537	289.16	142.835	255.786	212.33	1634.04	2.94492	6.37724e-10	Slc25a25	solute carrier family 25 (mitochondrial carrier, phosphate carrier), member 25 [Source:MGI Symbol;Acc:MGI:1915913]
ENSMUSG00000042677	117.722	160.76	130.013	101.612	293.367	329.872	245.383	340.67	302.323	127.527	-1.24179	6.74336e-10	Zc3h12a	zinc finger CCCH type containing 12A [Source:MGI Symbol;Acc:MGI:2385891]
ENSMUSG00000009633	1111.06	426.202	413.219	274.458	9566.92	7061.98	12933	4116.34	8419.56	556.235	-3.91992	7.8343e-10	G0s2	G0/G1 switch gene 2 [Source:MGI Symbol;Acc:MGI:1316737]
ENSMUSG00000024039	110.911	132.721	133.036	83.804	10.2121	8.3512	35.7088	7.92256	15.5487	115.118	2.8697	8.11575e-10	Cbs	cystathionine beta-synthase [Source:MGI Symbol;Acc:MGI:88285]
ENSMUSG00000015536	3930.55	3347.93	3364.2	3892.69	2259.67	2288.23	2480.39	2282.83	2327.78	3633.84	0.64236	8.12825e-10	Mocs2	molybdenum cofactor synthesis 2 [Source:MGI Symbol;Acc:MGI:1336894]
ENSMUSG00000027901	490.345	382.273	331.583	341.501	154.11	207.736	148.329	141.474	162.912	386.426	1.2469	8.64558e-10	Dennd2d	DENN/MADD domain containing 2D [Source:MGI Symbol;Acc:MGI:2181193]
ENSMUSG00000031373	4241.88	3525.51	4125.13	4313.81	1959.8	2072.14	2569.2	1666	2066.79	4051.58	0.970687	8.68498e-10	Car5b	carbonic anhydrase 5b, mitochondrial [Source:MGI Symbol;Acc:MGI:1926249]
ENSMUSG00000028207	4100.81	3486.26	3888.29	2873.43	1343.36	1475.03	1608.73	741.325	1292.11	3587.19	1.47271	8.9606e-10	Asph	aspartate-beta-hydroxylase [Source:MGI Symbol;Acc:MGI:1914186]
ENSMUSG00000022324	125.505	126.178	92.7222	135.134	383.419	276.633	237.143	293.135	297.583	119.885	-1.3119	8.9606e-10	Matn2	matrilin 2 [Source:MGI Symbol;Acc:MGI:109613]
ENSMUSG00000022637	2881.75	2911.45	2680.88	2150.62	972.01	1227.63	768.197	471.958	859.948	2656.18	1.62677	9.50551e-10	Cblb	Casitas B-lineage lymphoma b [Source:MGI Symbol;Acc:MGI:2146430]
ENSMUSG00000056427	537.045	582.289	576.49	461.969	302.651	297.511	234.396	303.321	284.47	539.449	0.925023	1.00515e-09	Slit3	slit guidance ligand 3 [Source:MGI Symbol;Acc:MGI:1315202]
ENSMUSG00000042834	104.101	131.786	138.076	112.088	624.797	362.233	250.877	370.097	402.001	121.513	-1.72624	1.051e-09	Nrep	neuronal regeneration related protein [Source:MGI Symbol;Acc:MGI:99444]
ENSMUSG00000020019	253.929	274.788	269.096	278.648	139.256	94.9949	93.3922	143.738	117.845	269.115	1.19349	1.07499e-09	Ntn4	netrin 4 [Source:MGI Symbol;Acc:MGI:1888978]
ENSMUSG00000034424	1785.29	1834.73	1742.57	1819.59	2421.2	2762.16	2759.65	2557.86	2625.22	1795.54	-0.547985	1.30513e-09	Gcsh	glycine cleavage system protein H (aminomethyl carrier) [Source:MGI Symbol;Acc:MGI:1915383]
ENSMUSG00000032334	164.421	198.147	227.774	280.743	710.208	416.516	558.522	791.124	619.093	217.771	-1.50796	1.32208e-09	Loxl1	lysyl oxidase-like 1 [Source:MGI Symbol;Acc:MGI:106096]
ENSMUSG00000000594	1429.2	1439.37	1589.38	1398.48	2085.13	2111.81	2256.06	2124.38	2144.35	1464.11	-0.550639	1.37445e-09	Gm2a	GM2 ganglioside activator protein [Source:MGI Symbol;Acc:MGI:95762]
ENSMUSG00000042540	115.776	225.252	139.083	87.9942	10.2121	24.0097	12.8185	39.6128	21.6633	142.026	2.73076	1.49621e-09	Acot5	acyl-CoA thioesterase 5 [Source:MGI Symbol;Acc:MGI:2384969]
ENSMUSG00000028085	711.195	829.038	862.72	728.047	1234.74	1270.43	1357.85	1201.97	1266.25	782.75	-0.694065	1.51901e-09	Gatb	glutamyl-tRNA(Gln) amidotransferase, subunit B [Source:MGI Symbol;Acc:MGI:2442496]
ENSMUSG00000019437	1016.69	1094.48	981.646	1178.49	1856.75	1653.54	1833.97	2271.51	1903.94	1067.83	-0.83409	1.52899e-09	Tlcd1	TLC domain containing 1 [Source:MGI Symbol;Acc:MGI:1915572]
ENSMUSG00000007682	1567.35	554.25	544.239	942.795	5493.2	7932.6	4788.64	6076.6	6072.76	902.159	-2.75089	1.53268e-09	Dio2	deiodinase, iodothyronine, type II [Source:MGI Symbol;Acc:MGI:1338833]
ENSMUSG00000024968	25.2956	25.2357	23.1806	25.1412	58.4877	88.7315	114.451	127.893	97.3908	24.7133	-1.97561	1.67972e-09	Rcor2	REST corepressor 2 [Source:MGI Symbol;Acc:MGI:1859854]
ENSMUSG00000041264	1070.2	970.171	1103.6	1009.84	557.954	683.754	636.349	674.549	638.152	1038.45	0.703374	1.69389e-09	Uspl1	ubiquitin specific peptidase like 1 [Source:MGI Symbol;Acc:MGI:2442342]
ENSMUSG00000046756	1520.65	1572.09	1743.58	1638.37	2276.38	2435.42	2478.56	2672.17	2465.63	1618.67	-0.60699	1.72509e-09	Mrps7	mitchondrial ribosomal protein S7 [Source:MGI Symbol;Acc:MGI:1354367]
ENSMUSG00000053886	344.409	395.359	421.281	246.174	99.3362	146.146	120.861	59.9851	106.582	351.806	1.72085	1.78983e-09	Sh2d4a	SH2 domain containing 4A [Source:MGI Symbol;Acc:MGI:1919531]
ENSMUSG00000047182	98.2637	197.212	136.06	169.703	351.855	374.76	600.64	485.54	453.199	150.31	-1.59211	1.79082e-09	Irs3	insulin receptor substrate 3 [Source:MGI Symbol;Acc:MGI:1194882]
ENSMUSG00000022948	533.153	601.917	570.443	525.87	285.011	368.497	310.392	277.29	310.297	557.846	0.846519	2.00442e-09	Setd4	SET domain containing 4 [Source:MGI Symbol;Acc:MGI:2136890]
ENSMUSG00000018572	352.193	352.364	298.324	304.837	542.172	638.867	640.927	833.001	663.741	326.929	-1.01997	2.08329e-09	Phf23	PHD finger protein 23 [Source:MGI Symbol;Acc:MGI:1925496]
ENSMUSG00000029405	1135.38	998.21	1071.35	1073.74	1816.83	1506.35	1973.14	1985.17	1820.37	1069.67	-0.767182	2.19156e-09	G3bp2	GTPase activating protein (SH3 domain) binding protein 2 [Source:MGI Symbol;Acc:MGI:2442040]
ENSMUSG00000038984	81.7242	105.616	124.973	75.4236	34.3499	19.8341	29.2995	16.9769	25.1151	96.9343	1.93584	2.27978e-09	Tspyl5	testis-specific protein, Y-encoded-like 5 [Source:MGI Symbol;Acc:MGI:2442458]
ENSMUSG00000026767	972.908	1118.78	1175.15	1143.92	654.505	723.423	721.501	677.945	694.343	1102.69	0.667135	2.32223e-09	Mindy3	MINDY lysine 48 deubiquitinase 3 [Source:MGI Symbol;Acc:MGI:1914210]
ENSMUSG00000035944	1926.36	1964.64	2277.74	2057.39	1126.12	1424.92	1119.79	1201.97	1218.2	2056.53	0.755796	2.37594e-09	Ttc38	tetratricopeptide repeat domain 38 [Source:MGI Symbol;Acc:MGI:2146198]
ENSMUSG00000041124	424.188	398.162	419.266	461.969	644.293	648.262	716.923	714.162	680.91	425.896	-0.67742	2.40627e-09	Msantd4	Myb/SANT-like DNA-binding domain containing 4 with coiled-coils [Source:MGI Symbol;Acc:MGI:1925350]
ENSMUSG00000020072	198.473	158.891	151.178	162.37	76.1268	82.4681	70.502	78.0938	76.7977	167.728	1.12922	2.49552e-09	Pbld2	phenazine biosynthesis-like protein domain containing 2 [Source:MGI Symbol;Acc:MGI:1914557]
ENSMUSG00000074364	3540.41	4191.92	3801.61	4661.6	7619.18	7506.68	6998.01	10591.3	8178.8	4048.89	-1.01429	2.56957e-09	Ehd2	EH-domain containing 2 [Source:MGI Symbol;Acc:MGI:2154274]
ENSMUSG00000027559	41514	34354.1	45378.5	25405.2	79677	103259	149168	81463.2	103392	36662.9	-1.49573	2.90854e-09	Car3	carbonic anhydrase 3 [Source:MGI Symbol;Acc:MGI:88270]
ENSMUSG00000030088	3482.04	3472.24	4343.84	3363.68	1840.97	2207.85	2267.97	1766.73	2020.88	3665.45	0.858819	3.06026e-09	Aldh1l1	aldehyde dehydrogenase 1 family, member L1 [Source:MGI Symbol;Acc:MGI:1340024]
ENSMUSG00000066798	239.335	224.317	207.617	192.749	383.419	397.726	379.062	349.724	377.483	216.005	-0.8048	3.13538e-09	Zbtb6	zinc finger and BTB domain containing 6 [Source:MGI Symbol;Acc:MGI:2442998]
ENSMUSG00000028042	1378.61	1862.76	1697.22	2075.2	2903.03	3700.63	4375.7	4760.33	3934.92	1753.45	-1.16611	3.18794e-09	Zbtb7b	zinc finger and BTB domain containing 7B [Source:MGI Symbol;Acc:MGI:102755]
ENSMUSG00000028822	3223.24	2920.79	3173.72	2630.4	1998.79	1980.28	1907.22	1844.82	1932.78	2987.04	0.627992	3.31005e-09	Tmem50a	transmembrane protein 50A [Source:MGI Symbol;Acc:MGI:1919067]
ENSMUSG00000047246	27.2414	20.5624	28.2198	20.951	183.818	97.0827	64.0927	109.784	113.694	24.2437	-2.23027	3.37278e-09	Hist1h2be	histone cluster 1, H2be [Source:MGI Symbol;Acc:MGI:2448380]
ENSMUSG00000025372	456.294	808.475	718.597	785.662	340.714	225.482	237.143	287.476	272.704	692.257	1.34368	4.23931e-09	Baiap2	brain-specific angiogenesis inhibitor 1-associated protein 2 [Source:MGI Symbol;Acc:MGI:2137336]
ENSMUSG00000006127	1324.13	1270.19	1354.55	1276.96	793.762	895.666	934.838	862.427	871.673	1306.46	0.583784	4.35983e-09	Inpp5k	inositol polyphosphate 5-phosphatase K [Source:MGI Symbol;Acc:MGI:1194899]
ENSMUSG00000046167	21.404	18.6931	28.2198	39.8069	159.681	115.873	72.3332	106.389	113.569	27.0309	-2.07682	4.37668e-09	Gldn	gliomedin [Source:MGI Symbol;Acc:MGI:2388361]
ENSMUSG00000025059	4480.24	3473.17	3893.33	4130.49	6907.12	6556.74	9945.35	8104.78	7878.5	3994.31	-0.980037	4.4642e-09	Gk	glycerol kinase [Source:MGI Symbol;Acc:MGI:106594]
ENSMUSG00000020788	684.927	815.018	720.613	957.46	313.791	403.989	337.86	462.904	379.636	794.505	1.06712	4.48798e-09	Atp2a3	ATPase, Ca++ transporting, ubiquitous [Source:MGI Symbol;Acc:MGI:1194503]
ENSMUSG00000056133	128.424	122.44	150.17	113.135	23.2094	18.7902	44.8649	6.79077	23.4138	128.542	2.43952	4.55189e-09	Unc93a2	unc-93 homolog A2 [Source:MGI Symbol;Acc:MGI:3712668]
ENSMUSG00000001082	463.104	387.881	343.677	388.641	215.383	207.736	208.759	233.15	216.257	395.826	0.873429	4.73143e-09	Mfsd10	major facilitator superfamily domain containing 10 [Source:MGI Symbol;Acc:MGI:1915544]
ENSMUSG00000039137	173.178	171.976	159.24	152.942	82.6255	66.8096	71.4176	89.4118	77.5661	164.334	1.08617	4.8448e-09	Whrn	whirlin [Source:MGI Symbol;Acc:MGI:2682003]
ENSMUSG00000026509	2153.04	2392.71	2093.31	2570.69	4368.94	3689.14	3526.01	4683.37	4066.86	2302.44	-0.820671	5.21252e-09	Capn2	calpain 2 [Source:MGI Symbol;Acc:MGI:88264]
ENSMUSG00000006931	435.863	488.824	399.109	459.874	211.67	279.765	249.046	207.118	236.9	445.917	0.912355	5.26541e-09	P3h4	prolyl 3-hydroxylase family member 4 (non-enzymatic) [Source:MGI Symbol;Acc:MGI:1913430]
ENSMUSG00000029466	1386.39	1223.46	1268.88	1275.92	725.99	818.418	791.087	909.963	811.364	1288.66	0.668516	5.26541e-09	Anapc7	anaphase promoting complex subunit 7 [Source:MGI Symbol;Acc:MGI:1929711]
ENSMUSG00000026791	884.373	841.188	772.013	847.468	505.037	566.838	540.21	561.37	543.364	836.261	0.622963	5.26541e-09	Slc2a8	solute carrier family 2, (facilitated glucose transporter), member 8 [Source:MGI Symbol;Acc:MGI:1860103]
ENSMUSG00000038342	1971.11	2237.56	2504.51	2047.96	1333.15	1434.32	1319.39	1175.93	1315.7	2190.28	0.735059	5.33411e-09	Mlxip	MLX interacting protein [Source:MGI Symbol;Acc:MGI:2141183]
ENSMUSG00000000204	9.72908	3.73861	7.05495	6.2853	1041.64	202.517	82.4049	126.761	363.33	6.70199	-5.7617	5.39743e-09	Slfn4	schlafen 4 [Source:MGI Symbol;Acc:MGI:1329010]
ENSMUSG00000024413	4455.92	4772.34	4590.76	3315.5	2017.36	2562.77	1618.8	1752.02	1987.74	4283.63	1.10783	5.39767e-09	Npc1	NPC intracellular cholesterol transporter 1 [Source:MGI Symbol;Acc:MGI:1097712]
ENSMUSG00000021681	863.942	729.03	813.335	673.574	1213.39	1195.27	1320.31	1310.62	1259.9	769.97	-0.710183	5.39767e-09	Aggf1	angiogenic factor with G patch and FHA domains 1 [Source:MGI Symbol;Acc:MGI:1913799]
ENSMUSG00000032633	10503.5	8736.21	8841.87	9718.12	5025.3	5279	3851.97	5917.02	5018.32	9449.93	0.913259	5.50322e-09	Flcn	folliculin [Source:MGI Symbol;Acc:MGI:2442184]
ENSMUSG00000036186	141.072	162.63	153.193	190.654	453.976	415.472	327.788	779.806	494.261	161.887	-1.6094	5.73896e-09	Fam69b	family with sequence similarity 69, member B [Source:MGI Symbol;Acc:MGI:1927576]
ENSMUSG00000034430	490.345	486.955	511.988	490.253	283.155	340.311	282.923	305.584	302.994	494.885	0.709354	5.8867e-09	Zxdc	ZXD family zinc finger C [Source:MGI Symbol;Acc:MGI:1933108]
ENSMUSG00000054312	1564.44	1363.66	1613.57	1417.33	2091.63	2372.78	2426.37	2466.18	2339.24	1489.75	-0.65084	5.96481e-09	Mrps21	mitochondrial ribosomal protein S21 [Source:MGI Symbol;Acc:MGI:1913542]
ENSMUSG00000045502	96.3178	82.2495	89.6987	74.376	194.959	212.956	157.485	177.692	185.773	85.6605	-1.11523	5.96481e-09	Hcar2	hydroxycarboxylic acid receptor 2 [Source:MGI Symbol;Acc:MGI:1933383]
ENSMUSG00000032594	2817.54	3470.37	3225.12	2888.09	2046.14	1979.23	2007.02	2056.47	2022.22	3100.28	0.616592	6.45034e-09	Ip6k1	inositol hexaphosphate kinase 1 [Source:MGI Symbol;Acc:MGI:1351633]
ENSMUSG00000030714	417.377	440.222	396.085	407.497	265.516	242.185	252.708	264.84	256.312	415.295	0.696716	6.51259e-09	Sgf29	SAGA complex associated factor 29 [Source:MGI Symbol;Acc:MGI:1922815]
ENSMUSG00000037493	2620.04	3303.07	3884.26	2598.97	5949.03	6367.79	9432.61	6480.65	7057.52	3101.58	-1.18619	6.59758e-09	Cib2	calcium and integrin binding family member 2 [Source:MGI Symbol;Acc:MGI:1929293]
ENSMUSG00000030707	96.3178	89.7268	82.6437	76.4711	560.739	274.546	173.966	321.43	332.67	86.2899	-1.94658	6.6688e-09	Coro1a	coronin, actin binding protein 1A [Source:MGI Symbol;Acc:MGI:1345961]
ENSMUSG00000023886	314.249	380.404	257.002	281.791	536.601	628.428	592.4	716.426	618.464	308.361	-1.00218	6.79074e-09	Smoc2	SPARC related modular calcium binding 2 [Source:MGI Symbol;Acc:MGI:1929881]
ENSMUSG00000035279	54.4828	45.798	61.4789	31.4265	161.537	155.541	106.211	200.328	155.904	48.2966	-1.68688	6.85793e-09	Ssc5d	scavenger receptor cysteine rich family, 5 domains [Source:MGI Symbol;Acc:MGI:3606211]
ENSMUSG00000043154	2333.03	1938.47	2223.32	1826.93	742.701	1009.45	979.703	473.09	801.236	2080.44	1.37605	6.88579e-09	Ppp2r3a	protein phosphatase 2, regulatory subunit B'', alpha [Source:MGI Symbol;Acc:MGI:2442104]
ENSMUSG00000024949	5474.55	5006.01	5541.16	4445.8	2668.15	3303.94	3057.22	3278.81	3077.03	5116.88	0.733959	6.88579e-09	Sf1	splicing factor 1 [Source:MGI Symbol;Acc:MGI:1095403]
ENSMUSG00000008429	1282.29	1386.09	1253.77	1326.2	819.756	870.613	902.791	942.785	883.986	1312.09	0.570462	7.20602e-09	Herpud2	HERPUD family member 2 [Source:MGI Symbol;Acc:MGI:1915393]
ENSMUSG00000023960	2079.1	1714.15	1681.09	1748.36	1108.48	1185.87	1166.49	1026.54	1121.84	1805.68	0.686406	7.25021e-09	Enpp5	ectonucleotide pyrophosphatase/phosphodiesterase 5 [Source:MGI Symbol;Acc:MGI:1933830]
ENSMUSG00000020914	6.81035	2.80396	6.0471	5.23775	131.829	73.073	29.2995	31.6902	66.473	5.22479	-3.67543	7.25021e-09	Top2a	topoisomerase (DNA) II alpha [Source:MGI Symbol;Acc:MGI:98790]
ENSMUSG00000007476	591.528	623.414	567.42	496.539	349.998	348.663	287.501	281.817	316.995	569.725	0.845713	7.66296e-09	Lrrc8a	leucine rich repeat containing 8A [Source:MGI Symbol;Acc:MGI:2652847]
ENSMUSG00000020715	958.314	916.895	741.778	708.144	387.133	396.682	488.02	468.563	435.099	831.283	0.93454	7.87458e-09	Ern1	endoplasmic reticulum (ER) to nucleus signalling 1 [Source:MGI Symbol;Acc:MGI:1930134]
ENSMUSG00000032715	794.865	1108.5	491.831	523.775	228.381	129.444	280.177	165.242	200.811	729.743	1.86013	8.32513e-09	Trib3	tribbles pseudokinase 3 [Source:MGI Symbol;Acc:MGI:1345675]
ENSMUSG00000068036	1263.81	1142.15	1067.31	1140.78	2209.54	1792.38	1931.94	1704.48	1909.58	1153.51	-0.727587	8.94504e-09	Afdn	afadin, adherens junction formation factor [Source:MGI Symbol;Acc:MGI:1314653]
ENSMUSG00000054555	1739.56	1881.46	1912.9	2103.48	4752.36	3644.25	4203.56	2824.96	3856.28	1909.35	-1.01443	9.5756e-09	Adam12	a disintegrin and metallopeptidase domain 12 (meltrin alpha) [Source:MGI Symbol;Acc:MGI:105378]
ENSMUSG00000026042	434.89	386.012	372.905	323.693	1311.8	888.359	687.623	792.256	920.008	379.375	-1.27803	9.86194e-09	Col5a2	collagen, type V, alpha 2 [Source:MGI Symbol;Acc:MGI:88458]
ENSMUSG00000029804	1759.02	1478.62	1312.22	1416.29	673.073	744.301	952.234	633.805	750.853	1491.54	0.989556	1.07133e-08	Herc3	hect domain and RLD 3 [Source:MGI Symbol;Acc:MGI:1921248]
ENSMUSG00000018326	5650.65	5692.04	5455.49	6292.63	8075.94	8671.68	9055.38	7995	8449.5	5772.7	-0.549716	1.08378e-08	Ywhab	tyrosine 3-monooxygenase/tryptophan 5-monooxygenase activation protein, beta polypeptide [Source:MGI Symbol;Acc:MGI:1891917]
ENSMUSG00000075232	478.671	438.353	368.873	432.638	683.285	674.359	741.644	726.612	706.475	429.634	-0.717201	1.12753e-08	Amd1	S-adenosylmethionine decarboxylase 1 [Source:MGI Symbol;Acc:MGI:88004]
ENSMUSG00000029512	3436.31	3514.3	3809.67	2787.53	1804.76	1753.75	1859.6	2234.16	1913.07	3386.95	0.824446	1.12763e-08	Ulk1	unc-51 like kinase 1 [Source:MGI Symbol;Acc:MGI:1270126]
ENSMUSG00000007655	9810.8	8545.54	8597.97	10219.9	15689.6	13678.2	15472	13592.9	14608.2	9293.55	-0.652554	1.14689e-08	Cav1	caveolin 1, caveolae protein [Source:MGI Symbol;Acc:MGI:102709]
ENSMUSG00000001983	610.986	662.669	687.354	736.427	1009.14	1002.14	1015.41	1031.06	1014.44	674.359	-0.589516	1.18835e-08	Taco1	translational activator of mitochondrially encoded cytochrome c oxidase I [Source:MGI Symbol;Acc:MGI:1917457]
ENSMUSG00000006262	1230.73	938.392	905.05	1135.54	1788.98	1794.46	1844.95	1731.65	1790.01	1052.43	-0.766464	1.22131e-08	Mob1b	MOB kinase activator 1B [Source:MGI Symbol;Acc:MGI:1915723]
ENSMUSG00000020894	3104.55	3561.03	3078.98	3132.17	1762.99	2177.58	1890.73	2180.97	2003.07	3219.18	0.68501	1.22642e-08	Vamp2	vesicle-associated membrane protein 2 [Source:MGI Symbol;Acc:MGI:1313277]
ENSMUSG00000031453	1162.62	1029.05	1093.52	924.986	715.778	581.452	559.438	563.634	605.075	1052.55	0.798199	1.29821e-08	Rasa3	RAS p21 protein activator 3 [Source:MGI Symbol;Acc:MGI:1197013]
ENSMUSG00000053469	42.8079	63.5565	43.3376	40.8544	0.928376	0	0	1.13179	0.515043	47.6391	6.57635	1.31635e-08	Tg	thyroglobulin [Source:MGI Symbol;Acc:MGI:98733]
ENSMUSG00000046876	877.563	571.073	645.024	710.239	274.799	378.936	297.573	372.36	330.917	700.975	1.0844	1.3257e-08	Atxn1	ataxin 1 [Source:MGI Symbol;Acc:MGI:104783]
ENSMUSG00000006050	2412.81	2238.5	2173.93	2318.23	1407.42	1649.36	1496.11	1616.2	1542.27	2285.87	0.56821	1.32896e-08	Sra1	steroid receptor RNA activator 1 [Source:MGI Symbol;Acc:MGI:1344414]
ENSMUSG00000039960	1852.42	1813.23	2038.88	1304.2	619.227	940.554	554.86	405.182	629.956	1752.18	1.47574	1.4284e-08	Rhou	ras homolog family member U [Source:MGI Symbol;Acc:MGI:1916831]
ENSMUSG00000020123	87.5617	97.204	70.5495	77.5187	32.4932	22.9658	16.481	30.5584	25.6246	83.2085	1.7056	1.4788e-08	Avpr1a	arginine vasopressin receptor 1A [Source:MGI Symbol;Acc:MGI:1859216]
ENSMUSG00000039824	128.424	139.263	130.013	160.275	255.303	240.097	330.535	294.267	280.051	139.494	-1.00681	1.51535e-08	Myl6b	myosin, light polypeptide 6B [Source:MGI Symbol;Acc:MGI:1917789]
ENSMUSG00000032435	1541.09	1334.69	1256.79	1350.29	868.032	795.452	845.108	947.312	863.976	1370.71	0.666333	1.56636e-08	Dync1li1	dynein cytoplasmic 1 light intermediate chain 1 [Source:MGI Symbol;Acc:MGI:2135610]
ENSMUSG00000042520	3155.14	3558.23	3298.69	3781.65	2101.84	2010.55	2334.81	2382.43	2207.41	3448.43	0.64362	1.56842e-08	Ubap2l	ubiquitin-associated protein 2-like [Source:MGI Symbol;Acc:MGI:1921633]
ENSMUSG00000021765	1175.27	1276.74	1365.64	575.105	168.964	244.273	126.354	64.5123	151.026	1098.19	2.86181	1.57802e-08	Fst	follistatin [Source:MGI Symbol;Acc:MGI:95586]
ENSMUSG00000036578	101.182	132.721	172.342	153.99	38.9918	63.6779	32.962	46.4036	45.5088	140.059	1.62696	1.61525e-08	Fxyd7	FXYD domain-containing ion transport regulator 7 [Source:MGI Symbol;Acc:MGI:1889006]
ENSMUSG00000020097	27455.5	17754.7	16472.3	16419.3	6665.74	7321.91	10785.9	6952.61	7931.54	19525.4	1.29965	1.67995e-08	Sgpl1	sphingosine phosphate lyase 1 [Source:MGI Symbol;Acc:MGI:1261415]
ENSMUSG00000039910	571.097	723.422	754.88	698.716	365.78	141.97	223.409	166.374	224.383	687.029	1.61208	1.73923e-08	Cited2	Cbp/p300-interacting transactivator, with Glu/Asp-rich carboxy-terminal domain, 2 [Source:MGI Symbol;Acc:MGI:1306784]
ENSMUSG00000047696	0.972908	2.80396	4.0314	3.14265	26.9229	25.0536	42.1181	30.5584	31.1633	2.73773	-3.51867	1.79898e-08	Ccdc144b	coiled-coil domain containing 144B [Source:MGI Symbol;Acc:MGI:2681852]
ENSMUSG00000028893	1942.9	2108.58	2724.22	1557.71	579.307	1050.16	930.26	797.915	839.411	2083.35	1.31167	1.81692e-08	Sesn2	sestrin 2 [Source:MGI Symbol;Acc:MGI:2651874]
ENSMUSG00000073616	1523.57	1609.47	1529.92	1534.66	2039.64	2090.93	2158.09	2157.2	2111.47	1549.41	-0.446305	1.87606e-08	Cops9	COP9 signalosome subunit 9 [Source:MGI Symbol;Acc:MGI:1914165]
ENSMUSG00000003378	968.043	861.751	803.257	940.7	394.56	515.687	442.24	578.347	482.708	893.438	0.889992	1.88046e-08	Grik5	glutamate receptor, ionotropic, kainate 5 (gamma 2) [Source:MGI Symbol;Acc:MGI:95818]
ENSMUSG00000045763	14.5936	24.301	19.1492	14.6657	235.808	69.9413	65.9239	98.4661	117.535	18.1774	-2.69183	1.88482e-08	Basp1	brain abundant, membrane attached signal protein 1 [Source:MGI Symbol;Acc:MGI:1917600]
ENSMUSG00000009013	362.895	578.551	458.572	607.579	1538.32	1098.18	910.116	1302.7	1212.33	501.899	-1.27238	1.92189e-08	Dynll1	dynein light chain LC8-type 1 [Source:MGI Symbol;Acc:MGI:1861457]
ENSMUSG00000028862	3455.77	4056.4	3884.26	3002.28	1360.07	1709.91	2039.06	1043.51	1538.14	3599.67	1.22637	1.96396e-08	Map3k6	mitogen-activated protein kinase kinase kinase 6 [Source:MGI Symbol;Acc:MGI:1855691]
ENSMUSG00000031996	46040.9	43738.1	35302	53792.7	22142.7	26766.6	22688.8	25896.6	24373.7	44718.4	0.87556	1.98085e-08	Aplp2	amyloid beta (A4) precursor-like protein 2 [Source:MGI Symbol;Acc:MGI:88047]
ENSMUSG00000035048	1314.4	1136.54	1285.01	1121.93	1689.64	1999.07	2093.08	2084.77	1966.64	1214.47	-0.695177	1.99334e-08	Anapc13	anaphase promoting complex subunit 13 [Source:MGI Symbol;Acc:MGI:1916260]
ENSMUSG00000059810	4730.28	3962.93	3169.69	3384.63	2226.25	1412.4	1785.44	1342.31	1691.6	3811.88	1.17178	1.99591e-08	Rgs3	regulator of G-protein signaling 3 [Source:MGI Symbol;Acc:MGI:1354734]
ENSMUSG00000049103	26.2685	16.8238	28.2198	7.33285	1064.85	339.267	155.654	226.359	446.532	19.6612	-4.50465	2.08636e-08	Ccr2	chemokine (C-C motif) receptor 2 [Source:MGI Symbol;Acc:MGI:106185]
ENSMUSG00000026213	683.954	663.604	717.59	567.772	392.703	411.297	410.193	417.632	407.956	658.23	0.690926	2.22114e-08	Stk11ip	serine/threonine kinase 11 interacting protein [Source:MGI Symbol;Acc:MGI:1918978]
ENSMUSG00000074227	197.5	244.879	263.049	196.939	101.193	124.224	87.8985	107.52	105.209	225.592	1.10371	2.2568e-08	Spint2	serine protease inhibitor, Kunitz type 2 [Source:MGI Symbol;Acc:MGI:1338031]
ENSMUSG00000024769	560.395	634.63	657.118	697.668	330.502	382.067	312.223	414.237	359.757	637.453	0.827231	2.27188e-08	Cdc42bpg	CDC42 binding protein kinase gamma (DMPK-like) [Source:MGI Symbol;Acc:MGI:2652845]
ENSMUSG00000032998	1207.38	1075.79	1083.44	1104.12	657.29	750.564	770.028	760.566	734.612	1117.68	0.605937	2.40045e-08	Foxj3	forkhead box J3 [Source:MGI Symbol;Acc:MGI:2443432]
ENSMUSG00000021067	4000.6	3029.21	3100.15	3830.89	1345.22	2029.34	1974.05	1497.36	1711.49	3490.21	1.02798	2.40905e-08	Sav1	salvador family WW domain containing 1 [Source:MGI Symbol;Acc:MGI:1927144]
ENSMUSG00000021367	106.047	86.9228	111.871	109.993	43.6337	40.7121	40.2868	47.5354	43.042	103.708	1.27001	2.61293e-08	Edn1	endothelin 1 [Source:MGI Symbol;Acc:MGI:95283]
ENSMUSG00000024082	766.651	699.121	649.056	755.283	1082.49	1079.39	1030.98	1095.58	1072.11	717.528	-0.579202	2.65423e-08	Ndufaf7	NADH:ubiquinone oxidoreductase complex assembly factor 7 [Source:MGI Symbol;Acc:MGI:1920944]
ENSMUSG00000042826	106.047	145.806	153.193	143.514	251.59	297.511	256.371	335.011	285.121	137.14	-1.05437	2.65744e-08	Fgf11	fibroblast growth factor 11 [Source:MGI Symbol;Acc:MGI:109167]
ENSMUSG00000066595	1381.53	1256.17	1161.04	1360.77	680.5	638.867	475.202	323.693	529.565	1289.88	1.28348	2.66108e-08	Flvcr1	feline leukemia virus subgroup C cellular receptor 1 [Source:MGI Symbol;Acc:MGI:2444881]
ENSMUSG00000039105	2897.32	2433.84	2635.53	2361.18	1708.21	1791.33	1685.64	1668.26	1713.36	2581.97	0.591698	2.66108e-08	Atp6v1g1	ATPase, H+ transporting, lysosomal V1 subunit G1 [Source:MGI Symbol;Acc:MGI:1913540]
ENSMUSG00000025260	10848.9	10720.5	11732.4	9531.66	3752.5	4750.79	6531.96	3222.22	4564.37	10708.4	1.23013	2.66383e-08	Hsd17b10	hydroxysteroid (17-beta) dehydrogenase 10 [Source:MGI Symbol;Acc:MGI:1333871]
ENSMUSG00000054200	294.791	372.927	536.176	370.833	954.371	1562.72	851.517	2472.97	1460.39	393.682	-1.89094	2.69127e-08	Ffar4	free fatty acid receptor 4 [Source:MGI Symbol;Acc:MGI:2147577]
ENSMUSG00000037622	3222.27	3356.34	3339.01	3561.67	1361.93	1629.53	2200.21	1939.9	1782.89	3369.82	0.91848	2.81098e-08	Wdtc1	WD and tetratricopeptide repeats 1 [Source:MGI Symbol;Acc:MGI:2685541]
ENSMUSG00000047963	275.333	360.776	300.339	335.216	147.612	182.682	125.439	173.165	157.224	317.916	1.01938	2.83932e-08	Stbd1	starch binding domain 1 [Source:MGI Symbol;Acc:MGI:1261768]
ENSMUSG00000032388	2545.13	2215.13	2334.18	2349.65	1462.19	1639.97	1624.29	1695.43	1605.47	2361.02	0.556768	2.85444e-08	Spg21	SPG21, maspardin [Source:MGI Symbol;Acc:MGI:106403]
ENSMUSG00000081058	2.91872	6.54258	4.0314	8.3804	47.3472	29.2292	30.2151	49.799	39.1476	5.46827	-2.84279	2.86922e-08	Hist2h3c2	histone cluster 2, H3c2 [Source:MGI Symbol;Acc:MGI:2448357]
ENSMUSG00000021866	482.562	474.804	546.255	555.201	276.656	315.258	254.54	332.748	294.8	514.706	0.806053	2.90198e-08	Anxa11	annexin A11 [Source:MGI Symbol;Acc:MGI:108481]
ENSMUSG00000026812	1437.96	1266.46	1373.7	1042.31	712.993	696.281	823.133	723.217	738.906	1280.11	0.792624	2.93531e-08	Tsc1	tuberous sclerosis 1 [Source:MGI Symbol;Acc:MGI:1929183]
ENSMUSG00000073002	324.951	259.834	364.842	255.602	135.543	132.575	140.088	170.901	144.777	301.307	1.05953	3.04279e-08	Vamp5	vesicle-associated membrane protein 5 [Source:MGI Symbol;Acc:MGI:1858622]
ENSMUSG00000036698	1199.6	1075.79	1116.7	1042.31	1598.66	1576.29	1767.13	1586.78	1632.21	1108.6	-0.558272	3.10928e-08	Ago2	argonaute RISC catalytic subunit 2 [Source:MGI Symbol;Acc:MGI:2446632]
ENSMUSG00000031924	4131.94	4314.36	4044.5	4985.29	7519.85	6361.53	7363.33	8955.89	7550.15	4369.02	-0.789178	3.12975e-08	Cyb5b	cytochrome b5 type B [Source:MGI Symbol;Acc:MGI:1913677]
ENSMUSG00000025979	613.905	674.82	680.299	673.574	915.379	964.564	970.546	980.134	957.656	660.65	-0.535456	3.12996e-08	Mob4	MOB family member 4, phocein [Source:MGI Symbol;Acc:MGI:104899]
ENSMUSG00000038175	1523.57	2020.72	1886.7	1703.32	1112.19	868.525	1009	740.194	932.479	1783.58	0.934826	3.25085e-08	Mylip	myosin regulatory light chain interacting protein [Source:MGI Symbol;Acc:MGI:2388271]
ENSMUSG00000046062	2694.95	2736.67	2656.69	2715.25	3875.97	5837.49	4439.79	5776.68	4982.48	2700.89	-0.883231	3.34698e-08	Ppp1r15b	protein phosphatase 1, regulatory subunit 15B [Source:MGI Symbol;Acc:MGI:2444211]
ENSMUSG00000036339	418.35	384.143	430.352	434.733	671.216	751.608	759.041	593.06	693.731	416.895	-0.735937	3.37836e-08	Tmem260	transmembrane protein 260 [Source:MGI Symbol;Acc:MGI:2443219]
ENSMUSG00000045569	151.774	175.715	159.24	165.513	93.766	76.2047	66.8395	58.8533	73.9159	163.06	1.13698	3.44068e-08	Mc2r	melanocortin 2 receptor [Source:MGI Symbol;Acc:MGI:96928]
ENSMUSG00000033910	306.466	326.194	336.622	325.788	198.672	191.034	203.265	202.591	198.891	323.768	0.702677	3.56353e-08	Gucy1a1	guanylate cyclase 1, soluble, alpha 1 [Source:MGI Symbol;Acc:MGI:1926562]
ENSMUSG00000050627	1412.66	1450.58	1466.42	1418.38	864.318	1050.16	982.449	994.847	972.945	1437.01	0.563263	3.72564e-08	Gpd1l	glycerol-3-phosphate dehydrogenase 1-like [Source:MGI Symbol;Acc:MGI:1289257]
ENSMUSG00000040170	1985.7	1392.63	1595.43	1541.99	553.312	682.711	720.585	273.894	557.625	1628.94	1.54573	3.81589e-08	Fmo2	flavin containing monooxygenase 2 [Source:MGI Symbol;Acc:MGI:1916776]
ENSMUSG00000030083	824.053	895.398	843.571	839.087	543.1	489.589	552.113	613.433	549.559	850.527	0.630881	3.9421e-08	Abtb1	ankyrin repeat and BTB (POZ) domain containing 1 [Source:MGI Symbol;Acc:MGI:1933148]
ENSMUSG00000032867	2057.7	2456.27	2256.58	2387.37	1411.13	1481.29	1574.85	1616.2	1520.87	2289.48	0.590363	3.96284e-08	Fbxw8	F-box and WD-40 domain protein 8 [Source:MGI Symbol;Acc:MGI:1923041]
ENSMUSG00000054920	534.126	469.196	508.964	619.102	829.968	836.164	952.234	902.04	880.102	532.847	-0.724729	4.09061e-08	Klhl5	kelch-like 5 [Source:MGI Symbol;Acc:MGI:1919028]
ENSMUSG00000058690	1255.05	905.679	911.097	1019.27	2099.99	1909.29	1729.59	1649.02	1846.97	1022.77	-0.852859	4.3643e-08	Ccser2	coiled-coil serine rich 2 [Source:MGI Symbol;Acc:MGI:101859]
ENSMUSG00000030654	5288.73	5234.06	5033.21	4848.06	3542.68	3845.73	3767.73	3379.54	3633.92	5101.01	0.489191	4.54865e-08	Arl6ip1	ADP-ribosylation factor-like 6 interacting protein 1 [Source:MGI Symbol;Acc:MGI:1858943]
ENSMUSG00000079658	1026.42	996.341	1007.85	1053.84	1430.63	1369.6	1375.25	1432.85	1402.08	1021.11	-0.457514	4.63881e-08	Eloc	elongin C [Source:MGI Symbol;Acc:MGI:1915173]
ENSMUSG00000025578	75.8868	125.244	115.903	109.993	220.954	232.79	211.506	226.359	222.902	106.756	-1.06139	4.7352e-08	Cbx8	chromobox 8 [Source:MGI Symbol;Acc:MGI:1353589]
ENSMUSG00000024940	2848.67	2772.18	2441.01	3098.65	4494.27	4091.04	4493.81	5344.33	4605.86	2790.13	-0.723064	4.74159e-08	Ltbp3	latent transforming growth factor beta binding protein 3 [Source:MGI Symbol;Acc:MGI:1101355]
ENSMUSG00000024664	301.601	299.089	224.751	384.451	862.461	811.11	483.442	882.8	759.953	302.473	-1.32892	4.85869e-08	Fads3	fatty acid desaturase 3 [Source:MGI Symbol;Acc:MGI:1928740]
ENSMUSG00000026672	3982.11	3513.36	3745.17	3472.63	2275.45	2601.4	2655.27	2382.43	2478.64	3678.32	0.569469	4.91301e-08	Optn	optineurin [Source:MGI Symbol;Acc:MGI:1918898]
ENSMUSG00000026385	27832	21948.5	23658.3	34467.5	49482.4	51854.7	47066	50035.5	49609.7	26976.6	-0.878927	4.96476e-08	Dbi	diazepam binding inhibitor [Source:MGI Symbol;Acc:MGI:94865]
ENSMUSG00000029407	2249.36	2469.36	2161.84	2636.68	1626.51	1619.09	1614.22	1529.05	1597.22	2379.31	0.574736	5.06517e-08	Uso1	USO1 vesicle docking factor [Source:MGI Symbol;Acc:MGI:1929095]
ENSMUSG00000026034	3858.55	3627.39	3903.4	3895.84	2014.58	2609.75	2381.5	1761.07	2191.72	3821.3	0.80179	5.15614e-08	Clk1	CDC-like kinase 1 [Source:MGI Symbol;Acc:MGI:107403]
ENSMUSG00000037106	41.835	29.9089	32.2512	57.6152	556.097	376.848	102.548	531.943	391.859	40.4026	-3.2786	5.21468e-08	Fer1l6	fer-1-like 6 (C. elegans) [Source:MGI Symbol;Acc:MGI:3645398]
ENSMUSG00000025006	3932.49	3095.57	3353.12	3563.76	5461.64	5843.75	4908.58	5725.75	5484.93	3486.24	-0.653741	5.23637e-08	Sorbs1	sorbin and SH3 domain containing 1 [Source:MGI Symbol;Acc:MGI:700014]
ENSMUSG00000032952	165.394	155.153	124.973	162.37	79.8403	62.634	74.1644	58.8533	68.873	151.973	1.13642	5.31865e-08	Ap4b1	adaptor-related protein complex AP-4, beta 1 [Source:MGI Symbol;Acc:MGI:1337130]
ENSMUSG00000021884	260.739	220.578	329.567	234.651	115.119	135.707	109.873	136.947	124.411	261.384	1.07356	5.46316e-08	Hacl1	2-hydroxyacyl-CoA lyase 1 [Source:MGI Symbol;Acc:MGI:1929657]
ENSMUSG00000016128	542.882	955.216	1187.25	754.236	382.491	357.014	330.535	275.026	336.266	859.896	1.35392	5.56337e-08	Stard13	StAR-related lipid transfer (START) domain containing 13 [Source:MGI Symbol;Acc:MGI:2385331]
ENSMUSG00000024675	2.91872	10.2812	12.0942	8.3804	271.086	83.512	28.3839	63.3805	111.591	8.41863	-3.73022	5.59224e-08	Ms4a4c	membrane-spanning 4-domains, subfamily A, member 4C [Source:MGI Symbol;Acc:MGI:1927656]
ENSMUSG00000072969	240.308	227.121	249.947	215.795	125.331	143.014	130.017	108.652	126.753	233.293	0.87852	5.59405e-08	Armcx5	armadillo repeat containing, X-linked 5 [Source:MGI Symbol;Acc:MGI:2148026]
ENSMUSG00000035530	12414.3	12759.9	13334.9	12057.3	7694.38	8946.22	9200.96	8975.13	8704.17	12641.6	0.538453	5.66203e-08	Eif1	eukaryotic translation initiation factor 1 [Source:MGI Symbol;Acc:MGI:105125]
ENSMUSG00000021806	112.857	102.812	118.926	105.803	294.295	270.37	169.388	280.685	253.685	110.1	-1.2031	5.7119e-08	Nid2	nidogen 2 [Source:MGI Symbol;Acc:MGI:1298229]
ENSMUSG00000054277	493.264	498.17	401.124	510.157	285.94	266.194	303.067	256.917	278.03	475.679	0.773184	5.84516e-08	Arfgap3	ADP-ribosylation factor GTPase activating protein 3 [Source:MGI Symbol;Acc:MGI:1913501]
ENSMUSG00000031349	425.161	341.149	382.983	595.008	1172.54	1004.23	775.522	1469.07	1105.34	436.075	-1.34196	5.84516e-08	Nsdhl	NAD(P) dependent steroid dehydrogenase-like [Source:MGI Symbol;Acc:MGI:1099438]
ENSMUSG00000029557	123.559	144.871	192.499	163.418	285.94	306.907	298.489	348.593	309.982	156.087	-0.989878	5.85067e-08	Mrm2	mitochondrial rRNA methyltransferase 2 [Source:MGI Symbol;Acc:MGI:1915267]
ENSMUSG00000017801	363.867	431.81	484.776	434.733	714.85	646.174	744.391	728.876	708.573	428.797	-0.725121	5.9367e-08	Mlx	MAX-like protein X [Source:MGI Symbol;Acc:MGI:108398]
ENSMUSG00000086040	71.0223	76.6416	121.95	71.2334	21.3527	33.4048	23.8059	16.9769	23.8851	85.2118	1.83299	6.27606e-08	Wipf3	WAS/WASL interacting protein family, member 3 [Source:MGI Symbol;Acc:MGI:3044681]
ENSMUSG00000018697	420.296	388.816	474.698	441.018	194.031	216.087	286.586	210.514	226.804	431.207	0.925037	6.40983e-08	Aatf	apoptosis antagonizing transcription factor [Source:MGI Symbol;Acc:MGI:1929608]
ENSMUSG00000074909	362.895	343.018	311.426	305.885	587.662	647.218	520.982	504.78	565.161	330.806	-0.772238	6.6083e-08	Ranbp6	RAN binding protein 6 [Source:MGI Symbol;Acc:MGI:2683212]
ENSMUSG00000015363	3074.39	3355.41	3117.28	3434.92	2008.08	2018.9	1774.45	2376.77	2044.55	3245.5	0.667127	6.84673e-08	Trabd	TraB domain containing [Source:MGI Symbol;Acc:MGI:1915226]
ENSMUSG00000018362	194.582	154.218	181.413	257.697	397.345	402.945	365.328	399.523	391.286	196.977	-0.991763	7.10245e-08	Kpna2	karyopherin (importin) alpha 2 [Source:MGI Symbol;Acc:MGI:103561]
ENSMUSG00000040463	1696.75	1861.83	1808.08	1737.89	1072.27	1111.75	1263.54	1284.59	1183.04	1776.14	0.586616	7.11324e-08	Mybbp1a	MYB binding protein (P160) 1a [Source:MGI Symbol;Acc:MGI:106181]
ENSMUSG00000025940	2326.22	2302.05	2274.72	2427.17	3013.51	3191.2	3423.47	3232.4	3215.15	2332.54	-0.463063	7.28622e-08	Tmem70	transmembrane protein 70 [Source:MGI Symbol;Acc:MGI:1915068]
ENSMUSG00000009185	0.972908	3.73861	5.03925	1.04755	132.758	59.5023	15.5654	29.4267	59.313	2.69958	-4.45352	7.28622e-08	Ccl8	chemokine (C-C motif) ligand 8 [Source:MGI Symbol;Acc:MGI:101878]
ENSMUSG00000019996	279.224	278.527	228.782	299.599	109.548	89.7754	144.666	149.397	123.347	271.533	1.13903	7.39439e-08	Map7	microtubule-associated protein 7 [Source:MGI Symbol;Acc:MGI:1328328]
ENSMUSG00000042401	7.78326	14.0198	6.0471	8.3804	40.8485	43.8438	36.6244	50.9307	43.0619	9.05764	-2.23686	7.39439e-08	Crtac1	cartilage acidic protein 1 [Source:MGI Symbol;Acc:MGI:1920082]
ENSMUSG00000116946	201.392	148.61	188.468	159.228	61.2728	78.2925	94.3078	78.0938	77.9917	174.424	1.16083	7.78661e-08	AC130815.2	novel transcript
ENSMUSG00000021998	146.909	140.198	155.209	149.8	1213.39	439.482	272.852	596.456	630.544	148.029	-2.091	7.80395e-08	Lcp1	lymphocyte cytosolic protein 1 [Source:MGI Symbol;Acc:MGI:104808]
ENSMUSG00000099083	1665.62	1807.62	1863.52	1538.85	1146.54	994.837	1144.51	897.513	1045.85	1718.9	0.716044	8.01871e-08	Atf7	activating transcription factor 7 [Source:MGI Symbol;Acc:MGI:2443472]
ENSMUSG00000056529	18.4852	34.5822	31.2434	28.2838	287.797	93.951	85.1517	121.102	147	28.1487	-2.38558	8.03532e-08	Ptafr	platelet-activating factor receptor [Source:MGI Symbol;Acc:MGI:106066]
ENSMUSG00000042390	1514.82	1292.63	1500.69	1330.39	919.092	996.924	945.825	878.272	935.029	1409.63	0.592011	8.05428e-08	Gatad2b	GATA zinc finger domain containing 2B [Source:MGI Symbol;Acc:MGI:2443225]
ENSMUSG00000070319	1404.88	1528.16	1435.18	1332.48	923.734	1010.5	944.909	1037.86	979.249	1425.17	0.542365	8.05428e-08	Eif3g	eukaryotic translation initiation factor 3, subunit G [Source:MGI Symbol;Acc:MGI:1858258]
ENSMUSG00000053175	149.828	183.192	178.39	265.03	452.119	628.428	348.847	683.604	528.25	194.11	-1.44413	8.53004e-08	Bcl3	B cell leukemia/lymphoma 3 [Source:MGI Symbol;Acc:MGI:88140]
ENSMUSG00000008305	851.294	899.137	945.364	949.08	382.491	617.989	495.345	471.958	491.946	911.219	0.889916	8.62398e-08	Tle1	transducin-like enhancer of split 1 [Source:MGI Symbol;Acc:MGI:104636]
ENSMUSG00000029622	1675.35	1822.57	1635.74	1651.99	3344.94	2666.12	2368.68	2889.47	2817.3	1696.41	-0.731732	8.7636e-08	Arpc1b	actin related protein 2/3 complex, subunit 1B [Source:MGI Symbol;Acc:MGI:1343142]
ENSMUSG00000047153	1228.78	1493.58	1187.25	1131.35	784.478	823.637	705.935	760.566	768.654	1260.24	0.713881	8.98056e-08	Khnyn	KH and NYN domain containing [Source:MGI Symbol;Acc:MGI:2451333]
ENSMUSG00000040272	538.018	666.408	558.349	681.955	288.725	275.59	391.881	234.281	297.619	611.183	1.03587	9.37293e-08	Accs	1-aminocyclopropane-1-carboxylate synthase (non-functional) [Source:MGI Symbol;Acc:MGI:1919717]
ENSMUSG00000022180	8966.32	9150.26	10835.4	4842.82	453.048	595.023	1374.33	141.474	640.969	8448.7	3.72013	9.48888e-08	Slc7a8	solute carrier family 7 (cationic amino acid transporter, y+ system), member 8 [Source:MGI Symbol;Acc:MGI:1355323]
ENSMUSG00000035969	1497.3	2068.39	2055.01	1881.4	998.933	983.354	866.167	1222.34	1017.7	1875.52	0.882625	9.4968e-08	Rusc2	RUN and SH3 domain containing 2 [Source:MGI Symbol;Acc:MGI:2140371]
ENSMUSG00000026872	569.151	560.792	422.289	500.729	1339.65	929.071	1280.94	820.551	1092.55	513.24	-1.09047	9.6566e-08	Zeb2	zinc finger E-box binding homeobox 2 [Source:MGI Symbol;Acc:MGI:1344407]
ENSMUSG00000101304	241.281	278.527	245.916	254.555	88.1957	148.234	73.2488	116.575	106.563	255.069	1.26434	9.77584e-08	Plet1os	placenta expressed transcript 1, opposite strand [Source:MGI Symbol;Acc:MGI:1916881]
ENSMUSG00000019947	1191.81	1257.11	1029.02	872.609	692.569	513.599	528.307	465.167	549.91	1087.64	0.983284	9.77584e-08	Arid5b	AT rich interactive domain 5B (MRF1-like) [Source:MGI Symbol;Acc:MGI:2175912]
ENSMUSG00000021109	787.082	661.735	603.702	725.952	1070.42	1168.12	1243.4	1051.44	1133.34	694.618	-0.706609	9.82039e-08	Hif1a	hypoxia inducible factor 1, alpha subunit [Source:MGI Symbol;Acc:MGI:106918]
ENSMUSG00000036282	750.112	708.468	706.503	772.044	989.649	1313.23	1398.14	1455.49	1289.12	734.282	-0.811662	1.00291e-07	Naa30	N(alpha)-acetyltransferase 30, NatC catalytic subunit [Source:MGI Symbol;Acc:MGI:1922259]
ENSMUSG00000064181	1322.18	1653.4	1610.54	1479.14	748.271	949.949	991.605	915.622	901.362	1516.32	0.750649	1.03047e-07	Rab3ip	RAB3A interacting protein [Source:MGI Symbol;Acc:MGI:105933]
ENSMUSG00000037111	2226.01	2065.58	2643.59	1616.37	1070.42	1280.87	1095.07	976.739	1105.77	2137.89	0.951123	1.04912e-07	Setd7	SET domain containing (lysine methyltransferase) 7 [Source:MGI Symbol;Acc:MGI:1920501]
ENSMUSG00000023087	1119.82	1301.97	1522.86	972.126	1890.17	4198.57	2919.88	3813.02	3205.41	1229.19	-1.38258	1.04912e-07	Noct	nocturnin [Source:MGI Symbol;Acc:MGI:109382]
ENSMUSG00000027823	2334.98	2534.78	2512.57	2451.27	1788.05	1741.23	1780.86	1900.28	1802.61	2458.4	0.447908	1.062e-07	Gmps	guanine monophosphate synthetase [Source:MGI Symbol;Acc:MGI:2448526]
ENSMUSG00000056938	1261.86	1377.68	1324.32	1310.48	2006.22	2135.82	2302.76	3079.61	2381.1	1318.59	-0.852247	1.11132e-07	Acbd4	acyl-Coenzyme A binding domain containing 4 [Source:MGI Symbol;Acc:MGI:1914381]
ENSMUSG00000032042	3625.05	4380.72	4077.76	3990.12	2562.32	2816.44	2785.29	2871.36	2758.85	4018.41	0.542764	1.14647e-07	Srpr	signal recognition particle receptor ('docking protein') [Source:MGI Symbol;Acc:MGI:1914648]
ENSMUSG00000044052	57.4015	70.099	68.5338	90.0893	137.4	149.278	174.881	195.8	164.34	71.5309	-1.20052	1.16058e-07	Ccr10	chemokine (C-C motif) receptor 10 [Source:MGI Symbol;Acc:MGI:1096320]
ENSMUSG00000018102	698.548	675.755	661.15	725.952	1822.4	1579.42	933.922	1660.34	1499.02	690.351	-1.11844	1.16415e-07	Hist1h2bc	histone cluster 1, H2bc [Source:MGI Symbol;Acc:MGI:1915274]
ENSMUSG00000000131	1510.93	1311.32	1430.14	1393.24	937.66	898.798	1009	1017.48	965.736	1411.41	0.54746	1.23523e-07	Xpo6	exportin 6 [Source:MGI Symbol;Acc:MGI:2429950]
ENSMUSG00000004707	7.78326	9.34654	13.1021	6.2853	148.54	48.0194	29.2995	71.303	74.2905	9.12929	-3.02444	1.24314e-07	Ly9	lymphocyte antigen 9 [Source:MGI Symbol;Acc:MGI:96885]
ENSMUSG00000046096	423.215	460.784	458.572	493.396	801.189	726.554	815.808	638.332	745.471	458.992	-0.701189	1.26629e-07	Mosmo	modulator of smoothened [Source:MGI Symbol;Acc:MGI:2446240]
ENSMUSG00000056131	222.796	236.467	181.413	172.846	112.334	77.2486	84.2361	57.7215	82.8849	203.381	1.28991	1.2934e-07	Pgm3	phosphoglucomutase 3 [Source:MGI Symbol;Acc:MGI:97566]
ENSMUSG00000003970	8871.94	8278.23	8939.63	8388.78	5934.18	6332.3	6735.23	6112.82	6278.63	8619.65	0.457121	1.3217e-07	Rpl8	ribosomal protein L8 [Source:MGI Symbol;Acc:MGI:1350927]
ENSMUSG00000021670	165.394	162.63	195.523	166.56	264.587	342.399	304.898	316.902	307.197	172.527	-0.8315	1.32581e-07	Hmgcr	3-hydroxy-3-methylglutaryl-Coenzyme A reductase [Source:MGI Symbol;Acc:MGI:96159]
ENSMUSG00000052336	0	3.73861	5.03925	3.14265	77.9836	36.5365	18.3122	36.2174	42.2624	2.98013	-3.83102	1.32774e-07	Cx3cr1	chemokine (C-X3-C motif) receptor 1 [Source:MGI Symbol;Acc:MGI:1333815]
ENSMUSG00000021228	105.074	101.877	87.683	206.367	6.49863	26.0975	5.49366	31.6902	17.445	125.25	2.86242	1.33088e-07	Acot3	acyl-CoA thioesterase 3 [Source:MGI Symbol;Acc:MGI:2159619]
ENSMUSG00000042870	669.36	613.133	644.016	663.099	376.921	382.067	465.13	423.291	411.852	647.402	0.652037	1.33088e-07	Tom1	target of myb1 trafficking protein [Source:MGI Symbol;Acc:MGI:1338026]
ENSMUSG00000026471	143.017	80.3802	117.918	104.755	269.229	244.273	209.675	312.375	258.888	111.518	-1.21432	1.34212e-07	Mr1	major histocompatibility complex, class I-related [Source:MGI Symbol;Acc:MGI:1195463]
ENSMUSG00000068551	256.848	329.933	273.127	322.645	471.615	616.945	539.294	757.17	596.256	295.638	-1.01078	1.34955e-07	Zfp467	zinc finger protein 467 [Source:MGI Symbol;Acc:MGI:1916160]
ENSMUSG00000030421	1280.35	1090.74	1129.8	1239.25	760.34	791.276	849.686	787.729	797.258	1185.03	0.571447	1.35787e-07	Uri1	URI1, prefoldin-like chaperone [Source:MGI Symbol;Acc:MGI:1342294]
ENSMUSG00000074212	684.927	602.852	654.095	675.67	1122.41	1112.8	1238.82	887.327	1090.34	654.386	-0.737573	1.38889e-07	Dnajb14	DnaJ heat shock protein family (Hsp40) member B14 [Source:MGI Symbol;Acc:MGI:1917854]
ENSMUSG00000028773	2475.08	4182.58	4131.18	2713.15	5795.85	7599.59	9483.89	9479.91	8089.81	3375.5	-1.26094	1.38889e-07	Fabp3	fatty acid binding protein 3, muscle and heart [Source:MGI Symbol;Acc:MGI:95476]
ENSMUSG00000028669	895.075	1023.45	906.058	928.129	545.885	636.779	651.914	625.882	615.115	938.177	0.609585	1.39717e-07	Pithd1	PITH (C-terminal proteasome-interacting domain of thioredoxin-like) domain containing 1 [Source:MGI Symbol;Acc:MGI:1913443]
ENSMUSG00000004328	108.966	137.394	134.044	105.803	24.1378	38.6243	54.021	15.8451	33.157	121.552	1.86526	1.39719e-07	Hif3a	hypoxia inducible factor 3, alpha subunit [Source:MGI Symbol;Acc:MGI:1859778]
ENSMUSG00000074771	1566.38	1175.79	1246.71	1294.77	2859.4	2592	3024.26	1871.99	2586.91	1320.91	-0.97001	1.39994e-07	Ankef1	ankyrin repeat and EF-hand domain containing 1 [Source:MGI Symbol;Acc:MGI:2441685]
ENSMUSG00000020107	1752.21	1674.9	1874.6	1426.76	855.963	1002.14	1147.26	935.994	985.34	1682.12	0.771456	1.4076e-07	Anapc16	anaphase promoting complex subunit 16 [Source:MGI Symbol;Acc:MGI:1289325]
ENSMUSG00000003033	2382.65	2725.45	2520.63	2958.28	1559.67	1572.11	1646.27	1910.47	1672.13	2646.75	0.662854	1.42441e-07	Ap1m1	adaptor-related protein complex AP-1, mu subunit 1 [Source:MGI Symbol;Acc:MGI:102776]
ENSMUSG00000070867	26.2685	48.602	46.3611	29.3314	139.256	84.5559	109.873	115.443	112.282	37.6408	-1.57557	1.42441e-07	Trabd2b	TraB domain containing 2B [Source:MGI Symbol;Acc:MGI:3650152]
ENSMUSG00000052566	278.252	328.998	258.01	280.743	153.182	153.453	109.873	166.374	145.721	286.501	0.979144	1.43958e-07	Hook2	hook microtubule tethering protein 2 [Source:MGI Symbol;Acc:MGI:2181664]
ENSMUSG00000027111	465.05	517.798	502.917	471.397	1297.87	907.149	722.416	1243.84	1042.82	489.291	-1.09135	1.44526e-07	Itga6	integrin alpha 6 [Source:MGI Symbol;Acc:MGI:96605]
ENSMUSG00000092981	409.594	468.262	415.234	382.356	244.163	265.151	266.442	263.708	259.866	418.861	0.689964	1.46111e-07	Mir5125	microRNA 5125 [Source:MGI Symbol;Acc:MGI:4950450]
ENSMUSG00000009585	434.89	626.218	541.216	596.056	344.428	244.273	234.396	210.514	258.402	549.595	1.08701	1.47943e-07	Apobec3	apolipoprotein B mRNA editing enzyme, catalytic polypeptide 3 [Source:MGI Symbol;Acc:MGI:1933111]
ENSMUSG00000030738	5312.08	5428.47	4683.48	5429.45	3678.23	3885.4	3450.02	3574.21	3646.96	5213.37	0.515595	1.5564e-07	Eif3c	eukaryotic translation initiation factor 3, subunit C [Source:MGI Symbol;Acc:MGI:1926966]
ENSMUSG00000056608	512.722	356.103	347.708	328.931	1069.49	1096.09	1204.94	577.215	986.935	386.366	-1.35331	1.58699e-07	Chd9	chromodomain helicase DNA binding protein 9 [Source:MGI Symbol;Acc:MGI:1924001]
ENSMUSG00000025010	96.3178	113.093	92.7222	123.611	184.747	211.912	267.358	213.909	219.481	106.436	-1.04531	1.59467e-07	Ccnj	cyclin J [Source:MGI Symbol;Acc:MGI:2443297]
ENSMUSG00000029304	9.72908	2.80396	4.0314	3.14265	439.122	50.1072	110.789	66.7759	166.698	4.92677	-5.07969	1.60241e-07	Spp1	secreted phosphoprotein 1 [Source:MGI Symbol;Acc:MGI:98389]
ENSMUSG00000033318	2210.45	1953.43	1910.88	2069.96	1065.78	1311.14	1265.37	1439.64	1270.48	2036.18	0.681135	1.62755e-07	Gstt2	glutathione S-transferase, theta 2 [Source:MGI Symbol;Acc:MGI:106188]
ENSMUSG00000015189	320.087	317.782	331.583	294.361	489.254	518.818	577.75	457.245	510.767	315.953	-0.693802	1.65006e-07	Casd1	CAS1 domain containing 1 [Source:MGI Symbol;Acc:MGI:2384865]
ENSMUSG00000039087	1035.17	1408.52	1251.75	1403.72	2028.5	3308.12	2235	3234.67	2701.57	1274.79	-1.08329	1.65467e-07	Rreb1	ras responsive element binding protein 1 [Source:MGI Symbol;Acc:MGI:2443664]
ENSMUSG00000028649	3327.34	2320.75	2500.48	2244.9	7414.94	5685.08	6060.42	3935.25	5773.92	2598.37	-1.15203	1.69587e-07	Macf1	microtubule-actin crosslinking factor 1 [Source:MGI Symbol;Acc:MGI:108559]
ENSMUSG00000035504	947.612	1433.76	1055.22	1864.64	428.91	557.443	439.493	676.813	525.665	1325.31	1.33491	1.73049e-07	Reep6	receptor accessory protein 6 [Source:MGI Symbol;Acc:MGI:1917585]
ENSMUSG00000041375	1093.55	1091.68	1177.17	1024.5	686.07	685.842	734.319	812.628	729.715	1096.72	0.588645	1.79483e-07	Ccdc9	coiled-coil domain containing 9 [Source:MGI Symbol;Acc:MGI:1921443]
ENSMUSG00000022889	1389.31	1364.59	1444.25	1391.15	1788.98	2110.77	2180.07	2077.97	2039.45	1397.33	-0.545415	1.79483e-07	Mrpl39	mitochondrial ribosomal protein L39 [Source:MGI Symbol;Acc:MGI:1351620]
ENSMUSG00000016494	294.791	301.893	295.3	259.792	928.376	690.018	426.674	650.782	673.962	287.944	-1.22664	1.82495e-07	Cd34	CD34 antigen [Source:MGI Symbol;Acc:MGI:88329]
ENSMUSG00000030022	518.56	429.941	420.274	373.975	684.213	726.554	707.766	763.961	720.624	435.687	-0.724894	1.83393e-07	Adamts9	a disintegrin-like and metallopeptidase (reprolysin type) with thrombospondin type 1 motif, 9 [Source:MGI Symbol;Acc:MGI:1916320]
ENSMUSG00000020256	74.9139	109.354	39.3062	119.421	17.6391	25.0536	17.3966	13.5815	18.4177	85.7488	2.21787	1.89135e-07	Aldh1l2	aldehyde dehydrogenase 1 family, member L2 [Source:MGI Symbol;Acc:MGI:2444680]
ENSMUSG00000039616	480.616	496.301	430.352	628.53	289.653	282.897	249.046	298.794	280.097	508.95	0.86208	1.92619e-07	Mocos	molybdenum cofactor sulfurase [Source:MGI Symbol;Acc:MGI:1915841]
ENSMUSG00000020593	34268.7	37360.9	37021.4	30003.9	18655.7	21545.1	11855.3	13479.7	16383.9	34663.7	1.08115	1.98048e-07	Lpin1	lipin 1 [Source:MGI Symbol;Acc:MGI:1891340]
ENSMUSG00000020695	164.421	197.212	181.413	157.132	324.003	316.302	270.105	366.701	319.278	175.045	-0.864344	1.98203e-07	Mrc2	mannose receptor, C type 2 [Source:MGI Symbol;Acc:MGI:107818]
ENSMUSG00000028960	4237.01	3840.49	3350.09	3441.2	2153.83	2039.78	2318.32	2615.58	2281.88	3717.2	0.704254	1.99379e-07	Ube4b	ubiquitination factor E4B [Source:MGI Symbol;Acc:MGI:1927086]
ENSMUSG00000021754	305.493	328.063	351.74	297.504	553.312	486.457	535.632	470.826	511.557	320.7	-0.674692	1.99379e-07	Map3k1	mitogen-activated protein kinase kinase kinase 1 [Source:MGI Symbol;Acc:MGI:1346872]
ENSMUSG00000024300	30.1601	37.3861	36.2826	25.1412	390.846	117.961	87.8985	124.497	180.301	32.2425	-2.48347	2.00162e-07	Myo1f	myosin IF [Source:MGI Symbol;Acc:MGI:107711]
ENSMUSG00000037071	517074	393030	459186	788623	1.4092e+06	1.32975e+06	944740	1.54928e+06	1.30824e+06	539478	-1.278	2.03229e-07	Scd1	stearoyl-Coenzyme A desaturase 1 [Source:MGI Symbol;Acc:MGI:98239]
ENSMUSG00000027900	3384.75	3367.56	3193.88	3517.67	2053.57	2455.25	2246.91	1809.74	2141.37	3365.96	0.652268	2.07085e-07	Dram2	DNA-damage regulated autophagy modulator 2 [Source:MGI Symbol;Acc:MGI:1914421]
ENSMUSG00000041801	1414.61	1630.04	1767.77	2602.11	4265.89	4883.36	3284.29	6876.78	4827.58	1853.63	-1.38094	2.13255e-07	Phlda3	pleckstrin homology like domain, family A, member 3 [Source:MGI Symbol;Acc:MGI:1351485]
ENSMUSG00000004626	2687.17	2889.01	2547.85	3014.85	1870.68	1887.37	1694.79	2033.83	1871.67	2784.72	0.573579	2.16784e-07	Stxbp2	syntaxin binding protein 2 [Source:MGI Symbol;Acc:MGI:107370]
ENSMUSG00000026567	18.4852	4.67327	6.0471	35.6167	110.477	115.873	74.1644	152.792	113.327	16.2056	-2.81298	2.27632e-07	Adcy10	adenylate cyclase 10 [Source:MGI Symbol;Acc:MGI:2660854]
ENSMUSG00000030124	45.7267	48.602	69.5417	58.6628	130.901	134.663	112.62	189.01	141.798	55.6333	-1.34835	2.28592e-07	Lag3	lymphocyte-activation gene 3 [Source:MGI Symbol;Acc:MGI:106588]
ENSMUSG00000004098	1138.3	1175.79	1055.22	1516.85	4848.91	2406.19	2112.31	3439.52	3201.73	1221.54	-1.39025	2.29968e-07	Col5a3	collagen, type V, alpha 3 [Source:MGI Symbol;Acc:MGI:1858212]
ENSMUSG00000022553	2833.11	2652.55	2548.85	2348.61	1504.9	1810.12	1642.6	1830.11	1696.93	2595.78	0.613809	2.3503e-07	Maf1	MAF1 homolog, negative regulator of RNA polymerase III [Source:MGI Symbol;Acc:MGI:1916127]
ENSMUSG00000019838	552.611	612.198	677.275	730.142	1111.27	934.29	1082.25	1232.52	1090.08	643.057	-0.761669	2.35196e-07	Slc16a10	solute carrier family 16 (monocarboxylic acid transporters), member 10 [Source:MGI Symbol;Acc:MGI:1919722]
ENSMUSG00000025190	1320.24	985.125	2330.15	1396.38	683.285	591.891	505.417	599.851	595.111	1507.97	1.34129	2.43553e-07	Got1	glutamic-oxaloacetic transaminase 1, soluble [Source:MGI Symbol;Acc:MGI:95791]
ENSMUSG00000021236	7157.68	7219.27	6389.77	7182	4703.15	5364.6	4435.21	4672.05	4793.75	6987.18	0.54365	2.5599e-07	Entpd5	ectonucleoside triphosphate diphosphohydrolase 5 [Source:MGI Symbol;Acc:MGI:1321385]
ENSMUSG00000028865	617.796	539.295	533.153	754.236	45.4904	57.4145	184.953	53.1943	85.2631	611.12	2.83915	2.60243e-07	Cd164l2	CD164 sialomucin-like 2 [Source:MGI Symbol;Acc:MGI:1916905]
ENSMUSG00000034205	55.4557	92.5307	69.5417	71.2334	252.518	184.77	126.354	221.832	196.369	72.1904	-1.4419	2.72352e-07	Loxl2	lysyl oxidase-like 2 [Source:MGI Symbol;Acc:MGI:2137913]
ENSMUSG00000037003	7074.01	8891.36	8138.39	7502.55	3831.41	4737.22	5339.84	4969.71	4719.54	7901.58	0.743559	2.8708e-07	Tns2	tensin 2 [Source:MGI Symbol;Acc:MGI:2387586]
ENSMUSG00000051590	39.8892	32.7129	32.2512	49.2348	8.35538	6.2634	10.9873	5.65897	7.81627	38.522	2.28071	2.95626e-07	Map3k19	mitogen-activated protein kinase kinase kinase 19 [Source:MGI Symbol;Acc:MGI:1203481]
ENSMUSG00000066072	175.123	69.1644	49.3847	216.843	27.8513	14.6146	23.8059	10.1861	19.1145	127.629	2.7289	2.95987e-07	Cyp4a10	cytochrome P450, family 4, subfamily a, polypeptide 10 [Source:MGI Symbol;Acc:MGI:88611]
ENSMUSG00000067713	815.297	839.319	807.288	791.948	508.75	541.784	494.429	612.301	539.316	813.463	0.594896	2.97828e-07	Prkag1	protein kinase, AMP-activated, gamma 1 non-catalytic subunit [Source:MGI Symbol;Acc:MGI:108411]
ENSMUSG00000006456	647.956	633.695	558.349	745.855	403.844	372.672	260.033	305.584	335.533	646.464	0.945861	2.99174e-07	Rbm14	RNA binding motif protein 14 [Source:MGI Symbol;Acc:MGI:1929092]
ENSMUSG00000007850	3312.75	3154.46	2932.84	2989.71	4779.28	4657.88	4423.31	4014.47	4468.74	3097.44	-0.528872	2.99249e-07	Hnrnph1	heterogeneous nuclear ribonucleoprotein H1 [Source:MGI Symbol;Acc:MGI:1891925]
ENSMUSG00000027305	917.452	1031.86	897.995	960.603	1334.08	1368.55	1294.67	1362.68	1340	951.977	-0.492752	3.13358e-07	Ndufaf1	NADH:ubiquinone oxidoreductase complex assembly factor 1 [Source:MGI Symbol;Acc:MGI:1916952]
ENSMUSG00000010095	5270.24	4977.97	4955.6	4051.92	1451.05	2130.6	1984.13	3068.29	2158.52	4813.93	1.15755	3.18957e-07	Slc3a2	solute carrier family 3 (activators of dibasic and neutral amino acid transport), member 2 [Source:MGI Symbol;Acc:MGI:96955]
ENSMUSG00000028089	551.639	559.858	482.76	514.347	301.722	375.804	314.97	323.693	329.047	527.151	0.681349	3.19064e-07	Chd1l	chromodomain helicase DNA binding protein 1-like [Source:MGI Symbol;Acc:MGI:1915308]
ENSMUSG00000032456	580.826	591.636	600.679	452.541	270.157	359.102	220.662	215.041	266.24	556.42	1.06386	3.22023e-07	Nmnat3	nicotinamide nucleotide adenylyltransferase 3 [Source:MGI Symbol;Acc:MGI:1921330]
ENSMUSG00000062980	1026.42	905.679	947.379	958.508	1487.26	1632.66	1713.11	1277.8	1527.7	959.496	-0.671542	3.25335e-07	Cped1	cadherin-like and PC-esterase domain containing 1 [Source:MGI Symbol;Acc:MGI:2444814]
ENSMUSG00000005950	727.735	827.169	656.111	650.528	1268.16	1329.93	1017.24	1512.08	1281.85	715.386	-0.840475	3.26594e-07	P2rx5	purinergic receptor P2X, ligand-gated ion channel, 5 [Source:MGI Symbol;Acc:MGI:2137026]
ENSMUSG00000035121	518.56	425.267	459.58	409.592	272.014	246.36	197.772	152.792	217.235	453.25	1.05909	3.33755e-07	Neil2	nei like 2 (E. coli) [Source:MGI Symbol;Acc:MGI:2686058]
ENSMUSG00000021624	9.72908	3.73861	10.0785	8.3804	105.835	40.7121	27.4683	56.5897	57.6512	7.98165	-2.85879	3.36702e-07	Cd180	CD180 antigen [Source:MGI Symbol;Acc:MGI:1194924]
ENSMUSG00000062480	477.698	311.24	275.143	239.889	83.5538	139.883	48.5273	35.0856	76.7623	325.992	2.08623	3.37619e-07	Acat3	acetyl-Coenzyme A acetyltransferase 3 [Source:MGI Symbol;Acc:MGI:109182]
ENSMUSG00000096146	248.091	247.683	365.85	197.987	89.1241	131.531	96.139	122.234	109.757	264.903	1.27431	3.37619e-07	Kcnj11	potassium inwardly rectifying channel, subfamily J, member 11 [Source:MGI Symbol;Acc:MGI:107501]
ENSMUSG00000022403	3268	3312.41	3325.91	3385.68	4874.9	4732	4534.1	4155.95	4574.24	3323	-0.461253	3.42293e-07	St13	suppression of tumorigenicity 13 [Source:MGI Symbol;Acc:MGI:1917606]
ENSMUSG00000025283	2391.41	2457.2	2352.32	2187.28	1501.18	1363.33	1677.4	1163.48	1426.35	2347.05	0.717863	3.56068e-07	Sat1	spermidine/spermine N1-acetyl transferase 1 [Source:MGI Symbol;Acc:MGI:98233]
ENSMUSG00000004929	456.294	529.014	543.231	508.062	317.505	280.809	285.67	356.515	310.125	509.15	0.716678	3.58451e-07	Thop1	thimet oligopeptidase 1 [Source:MGI Symbol;Acc:MGI:1354165]
ENSMUSG00000078234	1661.73	3049.78	2811.9	3773.27	7577.41	6778.04	5298.63	7322.71	6744.2	2824.17	-1.25586	3.67475e-07	Klhdc7a	kelch domain containing 7A [Source:MGI Symbol;Acc:MGI:2444612]
ENSMUSG00000068739	3350.69	4010.6	3297.69	3959.74	2485.26	2192.19	2180.07	2552.2	2352.43	3654.68	0.63573	3.97414e-07	Sars	seryl-aminoacyl-tRNA synthetase [Source:MGI Symbol;Acc:MGI:102809]
ENSMUSG00000021277	170.259	211.232	189.476	252.459	451.191	342.399	357.088	434.609	396.322	205.856	-0.945667	4.00917e-07	Traf3	TNF receptor-associated factor 3 [Source:MGI Symbol;Acc:MGI:108041]
ENSMUSG00000037474	7.78326	4.67327	4.0314	5.23775	41.7769	38.6243	18.3122	50.9307	37.411	5.43142	-2.77756	4.11885e-07	Dtl	denticleless E3 ubiquitin protein ligase [Source:MGI Symbol;Acc:MGI:1924093]
ENSMUSG00000015312	302.574	187.865	363.834	127.801	100.265	44.8877	53.1054	55.4579	63.4289	245.519	1.95007	4.22617e-07	Gadd45b	growth arrest and DNA-damage-inducible 45 beta [Source:MGI Symbol;Acc:MGI:107776]
ENSMUSG00000041319	132.315	153.283	147.146	168.656	268.301	238.009	369.906	344.065	305.07	150.35	-1.02145	4.38173e-07	Thoc6	THO complex 6 [Source:MGI Symbol;Acc:MGI:2677480]
ENSMUSG00000040731	6315.14	7072.52	6862.45	7131.72	4827.56	4986.71	4938.8	5320.57	5018.41	6845.46	0.448039	4.40131e-07	Eif4h	eukaryotic translation initiation factor 4H [Source:MGI Symbol;Acc:MGI:1341822]
ENSMUSG00000038214	125.505	114.028	94.7379	137.229	194.031	230.702	302.151	289.739	254.156	117.875	-1.10835	4.42668e-07	Bend3	BEN domain containing 3 [Source:MGI Symbol;Acc:MGI:2677212]
ENSMUSG00000021127	841.565	1376.74	1132.82	896.703	528.246	397.726	521.898	595.324	510.798	1061.96	1.05627	4.48157e-07	Zfp36l1	zinc finger protein 36, C3H type-like 1 [Source:MGI Symbol;Acc:MGI:107946]
ENSMUSG00000046668	287.008	248.618	260.025	213.7	375.992	437.394	488.936	511.571	453.473	252.338	-0.844249	4.63104e-07	Cxxc5	CXXC finger 5 [Source:MGI Symbol;Acc:MGI:1914643]
ENSMUSG00000029227	1049.77	1071.11	1137.86	1017.17	754.77	763.091	788.34	696.054	750.564	1068.98	0.509457	4.7262e-07	Fip1l1	FIP1 like 1 (S. cerevisiae) [Source:MGI Symbol;Acc:MGI:1914149]
ENSMUSG00000053063	13.6207	7.47723	9.07065	11.523	144.827	66.8096	41.2024	33.9538	71.6981	10.4229	-2.78677	4.7262e-07	Clec12a	C-type lectin domain family 12, member a [Source:MGI Symbol;Acc:MGI:3040968]
ENSMUSG00000097451	140.099	208.428	165.287	123.611	451.191	391.462	263.696	365.57	367.98	159.356	-1.20581	4.84053e-07	Rian	RNA imprinted and accumulated in nucleus [Source:MGI Symbol;Acc:MGI:1922995]
ENSMUSG00000022584	8.75617	7.47723	3.02355	6.2853	219.097	81.4242	12.8185	49.799	90.7846	6.38556	-3.82769	4.88458e-07	Ly6c2	lymphocyte antigen 6 complex, locus C2 [Source:MGI Symbol;Acc:MGI:3712069]
ENSMUSG00000036390	103.128	147.675	169.319	101.612	60.3444	32.3609	38.4556	50.9307	45.5229	130.434	1.51834	5.06639e-07	Gadd45a	growth arrest and DNA-damage-inducible 45 alpha [Source:MGI Symbol;Acc:MGI:107799]
ENSMUSG00000025269	147.882	144.871	145.13	187.511	292.438	244.273	336.029	287.476	290.054	156.349	-0.894087	5.49068e-07	Apex2	apurinic/apyrimidinic endonuclease 2 [Source:MGI Symbol;Acc:MGI:1924872]
ENSMUSG00000046215	0.972908	4.67327	2.0157	2.0951	19.4959	50.1072	35.7088	18.1087	30.8551	2.43924	-3.64863	5.53727e-07	Rprml	reprimo-like [Source:MGI Symbol;Acc:MGI:2144486]
ENSMUSG00000027475	502.993	446.764	415.234	497.586	724.133	678.535	690.37	706.24	699.819	465.645	-0.588032	5.60633e-07	Kif3b	kinesin family member 3B [Source:MGI Symbol;Acc:MGI:107688]
ENSMUSG00000031004	1.94582	0.934654	4.0314	6.2853	92.8376	63.6779	9.1561	43.0082	52.1699	3.29929	-4.00095	5.65345e-07	Mki67	antigen identified by monoclonal antibody Ki 67 [Source:MGI Symbol;Acc:MGI:106035]
ENSMUSG00000018169	169.286	271.984	254.986	243.032	389.918	459.316	455.058	490.067	448.59	234.822	-0.933136	5.69939e-07	Mfng	MFNG O-fucosylpeptide 3-beta-N-acetylglucosaminyltransferase [Source:MGI Symbol;Acc:MGI:1095404]
ENSMUSG00000030087	6403.68	5561.19	5925.15	4397.61	2299.59	2941.71	3398.74	1855.01	2623.76	5571.91	1.08637	5.71241e-07	Klf15	Kruppel-like factor 15 [Source:MGI Symbol;Acc:MGI:1929988]
ENSMUSG00000021822	117.722	122.44	104.816	91.1368	337.001	239.053	188.616	222.963	246.908	109.029	-1.17867	5.72344e-07	Plau	plasminogen activator, urokinase [Source:MGI Symbol;Acc:MGI:97611]
ENSMUSG00000090222	70.0493	87.8575	84.6594	46.0922	216.312	198.341	180.375	133.552	182.145	72.1646	-1.33496	5.72895e-07	Ifi203-ps	interferon activated gene 203, pseudogene [Source:MGI Symbol;Acc:MGI:3840117]
ENSMUSG00000038375	4520.13	5336.87	5888.87	6084.17	9139.86	9193.63	7971.3	11179.9	9371.16	5457.51	-0.779948	5.83244e-07	Trp53inp2	transformation related protein 53 inducible nuclear protein 2 [Source:MGI Symbol;Acc:MGI:1915978]
ENSMUSG00000024187	3801.15	4325.58	3891.31	4348.38	2480.62	2808.09	2744.08	3054.71	2771.88	4091.6	0.562093	5.86414e-07	Fam234a	family with sequence similarity 234, member A [Source:MGI Symbol;Acc:MGI:2146854]
ENSMUSG00000042350	1567.35	1413.2	1444.25	1558.75	2172.4	2037.69	2411.72	2045.15	2166.74	1495.89	-0.535009	5.88628e-07	Arel1	apoptosis resistant E3 ubiquitin protein ligase 1 [Source:MGI Symbol;Acc:MGI:1915747]
ENSMUSG00000049940	4102.75	4132.1	4249.1	4469.89	2504.76	2847.76	2768.8	3261.83	2845.79	4238.46	0.57504	6.13777e-07	Pgrmc2	progesterone receptor membrane component 2 [Source:MGI Symbol;Acc:MGI:1918054]
ENSMUSG00000034652	37.9434	24.301	36.2826	37.7118	232.094	90.8193	89.7298	108.652	130.324	34.0597	-1.93944	6.2161e-07	Cd300a	CD300A molecule [Source:MGI Symbol;Acc:MGI:2443411]
ENSMUSG00000067201	47.6725	85.0535	117.918	86.9466	17.6391	30.2731	25.6371	20.3723	23.4804	84.3978	1.84578	6.31211e-07	H2-M9	histocompatibility 2, M region locus 9 [Source:MGI Symbol;Acc:MGI:1276570]
ENSMUSG00000021097	1156.79	972.975	1080.42	1021.36	748.271	687.93	558.522	579.479	643.55	1057.88	0.716669	6.34884e-07	Clmn	calmin [Source:MGI Symbol;Acc:MGI:2136957]
ENSMUSG00000021223	33.0789	35.5168	36.2826	19.9034	103.05	94.9949	69.5863	173.165	110.199	31.1954	-1.81424	6.34884e-07	Papln	papilin, proteoglycan-like sulfated glycoprotein [Source:MGI Symbol;Acc:MGI:2386139]
ENSMUSG00000024241	501.047	470.131	440.431	508.062	705.566	717.159	784.678	668.89	719.073	479.918	-0.58427	6.35806e-07	Sos1	SOS Ras/Rac guanine nucleotide exchange factor 1 [Source:MGI Symbol;Acc:MGI:98354]
ENSMUSG00000022472	864.915	886.052	954.434	1120.88	512.464	566.838	363.497	573.82	504.155	956.57	0.924997	6.4494e-07	Desi1	desumoylating isopeptidase 1 [Source:MGI Symbol;Acc:MGI:106313]
ENSMUSG00000032872	542.882	559.858	591.608	560.439	840.18	800.671	855.18	748.116	811.037	563.697	-0.525913	6.46113e-07	Cyb5r4	cytochrome b5 reductase 4 [Source:MGI Symbol;Acc:MGI:2386848]
ENSMUSG00000020038	479.643	601.917	502.917	796.138	219.097	329.872	288.417	284.08	280.367	595.154	1.0864	6.50623e-07	Cry1	cryptochrome 1 (photolyase-like) [Source:MGI Symbol;Acc:MGI:1270841]
ENSMUSG00000024654	641.146	539.295	686.346	581.39	384.348	402.945	401.953	362.174	387.855	612.044	0.657265	6.53497e-07	Asrgl1	asparaginase like 1 [Source:MGI Symbol;Acc:MGI:1913764]
ENSMUSG00000045294	3366.26	3134.83	2494.43	2282.61	5274.1	4381.25	6063.17	7559.25	5819.44	2819.53	-1.04528	6.57746e-07	Insig1	insulin induced gene 1 [Source:MGI Symbol;Acc:MGI:1916289]
ENSMUSG00000059326	115.776	97.204	144.123	90.0893	481.827	222.351	223.409	356.515	321.025	111.798	-1.52197	6.73044e-07	Csf2ra	colony stimulating factor 2 receptor, alpha, low-affinity (granulocyte-macrophage) [Source:MGI Symbol;Acc:MGI:1339754]
ENSMUSG00000008682	9624	9404.49	8709.84	9309.57	6909.9	6377.18	6852.42	5683.87	6455.85	9261.98	0.52055	6.79949e-07	Rpl10	ribosomal protein L10 [Source:MGI Symbol;Acc:MGI:105943]
ENSMUSG00000063884	1633.51	1386.09	1295.09	1311.53	2086.99	2241.25	2407.14	2003.28	2184.66	1406.56	-0.635299	7.09717e-07	Ptcd3	pentatricopeptide repeat domain 3 [Source:MGI Symbol;Acc:MGI:1917206]
ENSMUSG00000066440	1441.85	1633.77	1383.78	1412.1	905.167	939.51	977.871	1094.45	979.248	1467.87	0.584844	7.20075e-07	Zfyve26	zinc finger, FYVE domain containing 26 [Source:MGI Symbol;Acc:MGI:1924767]
ENSMUSG00000001964	851.294	1036.53	1086.46	862.133	529.174	608.594	531.054	647.386	579.052	959.105	0.729267	7.25026e-07	Emd	emerin [Source:MGI Symbol;Acc:MGI:108117]
ENSMUSG00000023064	164.421	154.218	162.264	151.895	826.255	323.609	334.198	388.205	468.067	158.199	-1.56562	7.66177e-07	Sncg	synuclein, gamma [Source:MGI Symbol;Acc:MGI:1298397]
ENSMUSG00000034640	2087.86	2008.57	2706.08	1511.61	885.671	1263.12	852.433	714.162	928.846	2078.53	1.16205	7.91638e-07	Tiparp	TCDD-inducible poly(ADP-ribose) polymerase [Source:MGI Symbol;Acc:MGI:2159210]
ENSMUSG00000049323	794.865	612.198	687.354	665.194	987.792	1153.51	1070.35	1062.75	1068.6	689.903	-0.6311	8.14855e-07	Smcr8	Smith-Magenis syndrome chromosome region, candidate 8 homolog (human) [Source:MGI Symbol;Acc:MGI:2444720]
ENSMUSG00000020435	144.963	263.572	259.018	170.751	30.6364	72.0291	91.561	49.799	61.0064	209.576	1.77946	8.35868e-07	Osbp2	oxysterol binding protein 2 [Source:MGI Symbol;Acc:MGI:1921559]
ENSMUSG00000051469	550.666	483.216	487.8	573.01	760.34	882.095	827.711	746.984	804.283	523.673	-0.619592	8.54413e-07	Zfp24	zinc finger protein 24 [Source:MGI Symbol;Acc:MGI:1929704]
ENSMUSG00000021395	1034.2	836.515	908.073	975.269	629.439	605.462	664.733	574.952	618.646	938.514	0.600177	8.75253e-07	Spin1	spindlin 1 [Source:MGI Symbol;Acc:MGI:109242]
ENSMUSG00000032011	26.2685	29.9089	25.1963	25.1412	141.113	140.926	43.0337	100.73	106.451	26.6287	-1.99706	9.09749e-07	Thy1	thymus cell antigen 1, theta [Source:MGI Symbol;Acc:MGI:98747]
ENSMUSG00000004070	1288.13	1461.8	1518.83	1504.28	1001.72	984.398	1006.26	1062.75	1013.78	1443.26	0.509721	9.18135e-07	Hmox2	heme oxygenase 2 [Source:MGI Symbol;Acc:MGI:109373]
ENSMUSG00000029381	69.0764	130.852	105.824	131.991	41.7769	38.6243	42.1181	41.8764	41.0989	109.436	1.41208	9.3075e-07	Shroom3	shroom family member 3 [Source:MGI Symbol;Acc:MGI:1351655]
ENSMUSG00000020130	2489.67	1834.73	1930.03	1814.36	1252.38	1174.39	1333.13	1127.27	1221.79	2017.2	0.72304	9.3075e-07	Tbc1d15	TBC1 domain family, member 15 [Source:MGI Symbol;Acc:MGI:1913937]
ENSMUSG00000035226	39.8892	35.5168	31.2434	98.4697	246.02	163.892	136.426	306.716	213.264	51.2798	-2.05859	9.3075e-07	Rims4	regulating synaptic membrane exocytosis 4 [Source:MGI Symbol;Acc:MGI:2674366]
ENSMUSG00000021732	35.0247	48.602	39.3062	28.2838	107.692	110.653	91.561	75.8302	96.4341	37.8042	-1.34878	9.3329e-07	Fgf10	fibroblast growth factor 10 [Source:MGI Symbol;Acc:MGI:1099809]
ENSMUSG00000039236	193.609	257.03	318.481	233.604	138.328	123.18	120.861	112.048	123.604	250.681	1.0184	9.39706e-07	Isg20	interferon-stimulated protein [Source:MGI Symbol;Acc:MGI:1928895]
ENSMUSG00000064363	309129	276788	287844	288445	447511	456526	429620	363381	424259	290552	-0.546154	9.43902e-07	mt-Nd4	mitochondrially encoded NADH dehydrogenase 4 [Source:MGI Symbol;Acc:MGI:102498]
ENSMUSG00000002020	2862.29	2231.95	2080.2	3205.5	4946.39	4431.36	4495.64	4420.79	4573.54	2594.99	-0.817726	9.70453e-07	Ltbp2	latent transforming growth factor beta binding protein 2 [Source:MGI Symbol;Acc:MGI:99502]
ENSMUSG00000034135	2468.27	2002.96	2002.6	2216.62	1141.9	984.398	1371.58	1464.54	1240.61	2172.61	0.808527	9.94877e-07	Sik3	SIK family kinase 3 [Source:MGI Symbol;Acc:MGI:2446296]
ENSMUSG00000040158	409.594	417.79	399.109	448.351	600.659	659.745	652.83	823.946	684.295	418.711	-0.707578	9.98214e-07	Tax1bp3	Tax1 (human T cell leukemia virus type I) binding protein 3 [Source:MGI Symbol;Acc:MGI:1923531]
ENSMUSG00000024397	25.2956	14.9545	20.157	9.42795	143.898	75.1608	47.6117	66.7759	83.3617	17.4588	-2.2543	1.00947e-06	Aif1	allograft inflammatory factor 1 [Source:MGI Symbol;Acc:MGI:1343098]
ENSMUSG00000001783	2218.23	2296.44	2165.87	2155.86	1624.66	1706.78	1728.67	1662.61	1680.68	2209.1	0.394516	1.08753e-06	Rtcb	RNA 2',3'-cyclic phosphate and 5'-OH ligase [Source:MGI Symbol;Acc:MGI:106379]
ENSMUSG00000019945	122.586	103.747	105.824	101.612	44.5621	37.5804	49.4429	62.2487	48.4585	108.442	1.16697	1.08782e-06	Cabcoco1	ciliary associated calcium binding coiled-coil 1 [Source:MGI Symbol;Acc:MGI:1920537]
ENSMUSG00000048572	52.537	54.2099	68.5338	69.1383	22.281	19.8341	22.8902	9.05435	18.5149	61.1048	1.70474	1.11577e-06	Tmem252	transmembrane protein 252 [Source:MGI Symbol;Acc:MGI:3583948]
ENSMUSG00000046722	388.19	541.165	539.2	474.54	900.525	726.554	833.205	828.473	822.189	485.774	-0.759389	1.11577e-06	Cdc42se1	CDC42 small effector 1 [Source:MGI Symbol;Acc:MGI:1889510]
ENSMUSG00000033610	17158.2	13664.6	14404.2	14432.1	9236.41	10816.9	8658.01	10066.2	9694.37	14914.8	0.621591	1.14168e-06	Pank1	pantothenate kinase 1 [Source:MGI Symbol;Acc:MGI:1922985]
ENSMUSG00000035329	253.929	250.487	201.57	267.125	467.902	395.638	368.075	427.818	414.858	243.278	-0.769908	1.15425e-06	Fbxo33	F-box protein 33 [Source:MGI Symbol;Acc:MGI:1917861]
ENSMUSG00000026365	371.651	335.541	286.23	306.932	142.042	213.999	146.498	115.443	154.495	325.088	1.07323	1.16883e-06	Cfh	complement component factor h [Source:MGI Symbol;Acc:MGI:88385]
ENSMUSG00000091811	891.183	796.325	858.689	993.077	430.767	505.248	576.834	597.587	527.609	884.819	0.746406	1.19372e-06	Inafm1	InaF motif containing 1 [Source:MGI Symbol;Acc:MGI:1913550]
ENSMUSG00000022558	1672.43	2050.63	1975.39	2009.2	1128.91	1240.15	1277.28	1404.56	1262.72	1926.91	0.610208	1.19766e-06	Mroh1	maestro heat-like repeat family member 1 [Source:MGI Symbol;Acc:MGI:2442558]
ENSMUSG00000027360	605.149	447.699	682.315	576.152	189.389	262.019	218.831	363.306	258.386	577.829	1.16357	1.22713e-06	Hdc	histidine decarboxylase [Source:MGI Symbol;Acc:MGI:96062]
ENSMUSG00000021134	9412.88	8853.97	9041.43	7789.58	5696.52	6329.17	6461.46	6199.97	6171.78	8774.47	0.507686	1.23815e-06	Srsf5	serine/arginine-rich splicing factor 5 [Source:MGI Symbol;Acc:MGI:98287]
ENSMUSG00000036526	0	0.934654	1.00785	1.04755	45.4904	17.7463	17.3966	29.4267	27.515	0.747513	-5.21301	1.2897e-06	Card11	caspase recruitment domain family, member 11 [Source:MGI Symbol;Acc:MGI:1916978]
ENSMUSG00000021752	520.506	539.295	524.082	555.201	310.078	364.321	385.472	350.856	352.682	534.771	0.600578	1.29984e-06	Kctd6	potassium channel tetramerisation domain containing 6 [Source:MGI Symbol;Acc:MGI:1918643]
ENSMUSG00000016344	924.262	1071.11	958.466	1162.78	1540.18	1458.33	1666.41	1855.01	1629.98	1029.16	-0.663289	1.30463e-06	Ppdpf	pancreatic progenitor cell differentiation and proliferation factor [Source:MGI Symbol;Acc:MGI:1913746]
ENSMUSG00000000346	4296.36	4058.27	4048.54	4224.77	2955.95	3231.91	3044.4	3287.86	3130.03	4156.98	0.409639	1.32818e-06	Dazap2	DAZ associated protein 2 [Source:MGI Symbol;Acc:MGI:1344344]
ENSMUSG00000074093	596.392	520.602	598.663	599.198	784.478	843.471	857.011	909.963	848.731	578.714	-0.552324	1.33421e-06	Svip	small VCP/p97-interacting protein [Source:MGI Symbol;Acc:MGI:1922994]
ENSMUSG00000044827	2.91872	1.86931	9.07065	5.23775	132.758	28.1853	28.3839	33.9538	55.8202	4.77411	-3.55945	1.41347e-06	Tlr1	toll-like receptor 1 [Source:MGI Symbol;Acc:MGI:1341295]
ENSMUSG00000073676	3597.81	3550.75	4203.74	3917.84	5425.43	6329.17	5216.23	5511.84	5620.67	3817.54	-0.558102	1.41988e-06	Hspe1	heat shock protein 1 (chaperonin 10) [Source:MGI Symbol;Acc:MGI:104680]
ENSMUSG00000030621	1825.17	1813.23	1653.88	1549.33	1096.41	1226.58	922.935	1137.45	1095.85	1710.4	0.643021	1.42629e-06	Me3	malic enzyme 3, NADP(+)-dependent, mitochondrial [Source:MGI Symbol;Acc:MGI:1916679]
ENSMUSG00000056313	1482.71	2262.8	2018.72	1548.28	3090.56	3676.62	3389.59	2991.33	3287.02	1828.13	-0.846298	1.42629e-06	Tcim	transcriptional and immune response regulator [Source:MGI Symbol;Acc:MGI:1916318]
ENSMUSG00000037266	23092	22288.7	17895.4	20356	13781.7	11904.6	15035.2	12310.5	13258	20908	0.657146	1.45372e-06	Rsrp1	arginine/serine rich protein 1 [Source:MGI Symbol;Acc:MGI:106498]
ENSMUSG00000028648	4454.94	4236.79	4499.04	4703.5	5750.36	5872.98	6649.16	6427.46	6174.99	4473.57	-0.465066	1.47954e-06	Ndufs5	NADH:ubiquinone oxidoreductase core subunit S5 [Source:MGI Symbol;Acc:MGI:1890889]
ENSMUSG00000022096	97.2908	114.962	154.201	122.563	324.003	457.228	177.628	481.013	359.968	122.254	-1.55702	1.51511e-06	Hr	hairless [Source:MGI Symbol;Acc:MGI:96223]
ENSMUSG00000028926	253.929	240.206	226.766	212.653	374.136	362.233	404.7	339.538	370.152	233.388	-0.665942	1.53184e-06	Cdk14	cyclin-dependent kinase 14 [Source:MGI Symbol;Acc:MGI:894318]
ENSMUSG00000078937	1081.87	1119.72	1146.93	1258.11	615.513	732.818	714.176	849.978	728.121	1151.66	0.662463	1.5353e-06	Cpt1b	carnitine palmitoyltransferase 1b, muscle [Source:MGI Symbol;Acc:MGI:1098297]
ENSMUSG00000031808	20370.7	17658.4	16992.4	25239.7	10293.8	12889	10650.4	12231.3	11516.1	20065.3	0.80107	1.53609e-06	Slc27a1	solute carrier family 27 (fatty acid transporter), member 1 [Source:MGI Symbol;Acc:MGI:1347098]
ENSMUSG00000024013	35.0247	21.497	30.2355	36.6642	143.898	101.258	65.0083	81.4892	97.9135	30.8554	-1.66999	1.56747e-06	Fgd2	FYVE, RhoGEF and PH domain containing 2 [Source:MGI Symbol;Acc:MGI:1347084]
ENSMUSG00000026655	279.224	314.978	356.779	408.544	521.747	672.272	567.678	668.89	607.647	339.882	-0.838189	1.59196e-06	Fam107b	family with sequence similarity 107, member B [Source:MGI Symbol;Acc:MGI:1913790]
ENSMUSG00000026568	8665.69	7727.72	8315.77	9631.17	12217.4	13136.4	11667.6	14168.9	12797.6	8585.09	-0.575947	1.59229e-06	Mpc2	mitochondrial pyruvate carrier 2 [Source:MGI Symbol;Acc:MGI:1917706]
ENSMUSG00000010453	4461.75	4410.63	4573.63	3945.07	2398.92	2778.86	3244.92	2890.6	2828.33	4347.77	0.620369	1.598e-06	Kansl3	KAT8 regulatory NSL complex subunit 3 [Source:MGI Symbol;Acc:MGI:1918055]
ENSMUSG00000033684	860.05	1114.11	1040.1	1032.88	710.208	662.876	638.18	598.719	652.496	1011.79	0.632307	1.61229e-06	Qsox1	quiescin Q6 sulfhydryl oxidase 1 [Source:MGI Symbol;Acc:MGI:1330818]
ENSMUSG00000079523	322.032	279.461	308.402	311.122	1238.45	766.223	441.324	722.085	792.021	305.255	-1.37574	1.61693e-06	Tmsb10	thymosin, beta 10 [Source:MGI Symbol;Acc:MGI:109146]
ENSMUSG00000061411	118.695	181.323	188.468	188.559	404.772	388.331	259.118	433.477	371.424	169.261	-1.13326	1.62941e-06	Nol4l	nucleolar protein 4-like [Source:MGI Symbol;Acc:MGI:1918765]
ENSMUSG00000021124	817.242	800.064	941.332	976.316	1400.92	1208.84	1612.39	1429.46	1412.9	883.739	-0.677605	1.6448e-06	Vti1b	vesicle transport through interaction with t-SNAREs 1B [Source:MGI Symbol;Acc:MGI:1855688]
ENSMUSG00000027187	31725.5	30051.9	27459.9	27172.4	19028.9	18520.9	22620.1	18917.9	19772	29102.4	0.557661	1.66644e-06	Cat	catalase [Source:MGI Symbol;Acc:MGI:88271]
ENSMUSG00000002083	124.532	125.244	90.7065	128.849	218.168	199.385	213.337	265.972	224.216	117.333	-0.932433	1.66644e-06	Bbc3	BCL2 binding component 3 [Source:MGI Symbol;Acc:MGI:2181667]
ENSMUSG00000062040	135.234	176.65	129.005	151.895	246.948	326.741	242.637	315.771	283.024	148.196	-0.930581	1.68734e-06	Zfp27	zinc finger protein 27 [Source:MGI Symbol;Acc:MGI:99174]
ENSMUSG00000060923	969.016	1009.43	942.34	912.416	1326.65	1494.86	1267.2	1558.48	1411.8	958.299	-0.558033	1.69946e-06	Acyp2	acylphosphatase 2, muscle type [Source:MGI Symbol;Acc:MGI:1922822]
ENSMUSG00000028106	941.775	1045.88	1002.81	849.563	584.877	648.262	690.37	624.75	637.065	960.007	0.591808	1.69971e-06	Rprd2	regulation of nuclear pre-mRNA domain containing 2 [Source:MGI Symbol;Acc:MGI:1922387]
ENSMUSG00000021620	56.4286	62.6218	73.5731	204.272	22.281	16.7024	7.32488	21.5041	16.9531	99.2239	2.55284	1.70345e-06	Acot12	acyl-CoA thioesterase 12 [Source:MGI Symbol;Acc:MGI:1921406]
ENSMUSG00000051000	237.389	222.448	338.638	200.082	111.405	112.741	135.51	118.838	119.624	249.639	1.06052	1.72109e-06	Fam160a1	family with sequence similarity 160, member A1 [Source:MGI Symbol;Acc:MGI:2444746]
ENSMUSG00000032842	1489.52	1596.39	1641.79	1575.51	948.8	978.134	951.319	1232.52	1027.69	1575.8	0.617633	1.76084e-06	Abcc10	ATP-binding cassette, sub-family C (CFTR/MRP), member 10 [Source:MGI Symbol;Acc:MGI:2386976]
ENSMUSG00000023067	10706.8	10661.6	7784.64	11546.1	5197.05	3204.77	5911.18	2841.94	4288.73	10174.8	1.24621	1.7735e-06	Cdkn1a	cyclin-dependent kinase inhibitor 1A (P21) [Source:MGI Symbol;Acc:MGI:104556]
ENSMUSG00000032643	1218.08	796.325	905.05	620.149	503.18	318.389	317.717	400.655	384.985	884.901	1.20068	1.79028e-06	Fhl3	four and a half LIM domains 3 [Source:MGI Symbol;Acc:MGI:1341092]
ENSMUSG00000032511	5.83745	12.1505	11.0864	10.4755	31.5648	55.3267	34.7932	45.2718	41.7391	9.88745	-2.07292	1.81512e-06	Scn5a	sodium channel, voltage-gated, type V, alpha [Source:MGI Symbol;Acc:MGI:98251]
ENSMUSG00000002910	722.87	443.026	980.638	370.833	200.529	145.102	288.417	177.692	202.935	629.342	1.63158	1.82147e-06	Arrdc2	arrestin domain containing 2 [Source:MGI Symbol;Acc:MGI:1918057]
ENSMUSG00000035569	3618.24	3447.94	3767.34	3375.21	2316.3	2581.56	2767.89	2409.59	2518.84	3552.18	0.49583	1.8343e-06	Ankrd11	ankyrin repeat domain 11 [Source:MGI Symbol;Acc:MGI:1924337]
ENSMUSG00000028708	737.464	763.612	739.762	780.425	562.596	556.399	524.644	537.602	545.31	755.316	0.469917	1.83636e-06	Mknk1	MAP kinase-interacting serine/threonine kinase 1 [Source:MGI Symbol;Acc:MGI:894316]
ENSMUSG00000035373	7.78326	8.41188	10.0785	4.1902	336.072	32.3609	95.2234	76.962	135.155	7.61596	-4.1484	1.87108e-06	Ccl7	chemokine (C-C motif) ligand 7 [Source:MGI Symbol;Acc:MGI:99512]
ENSMUSG00000005142	1297.86	1367.4	1511.78	1477.05	932.09	909.237	889.057	1082	953.095	1413.52	0.569218	1.91906e-06	Man2b1	mannosidase 2, alpha B1 [Source:MGI Symbol;Acc:MGI:107286]
ENSMUSG00000028062	1396.12	1335.62	1540	1461.33	1859.54	1975.06	2075.69	2028.18	1984.61	1433.27	-0.469693	1.92226e-06	Lamtor2	late endosomal/lysosomal adaptor, MAPK and MTOR activator 2 [Source:MGI Symbol;Acc:MGI:1932697]
ENSMUSG00000032702	920.371	1328.14	1108.64	1325.15	661.004	710.896	727.91	700.581	700.098	1170.57	0.74158	1.93054e-06	Kank1	KN motif and ankyrin repeat domains 1 [Source:MGI Symbol;Acc:MGI:2147707]
ENSMUSG00000025139	2474.1	2375.89	2437.99	2213.47	1388.85	1582.55	1717.68	1756.54	1611.41	2375.36	0.56021	1.95735e-06	Tollip	toll interacting protein [Source:MGI Symbol;Acc:MGI:1891808]
ENSMUSG00000079003	169.286	129.917	138.076	175.988	295.224	255.755	286.586	247.863	271.357	153.317	-0.826501	1.99009e-06	Samd1	sterile alpha motif domain containing 1 [Source:MGI Symbol;Acc:MGI:2142433]
ENSMUSG00000029777	4812.97	5094.8	4487.96	5579.25	3375.58	3385.37	3106.66	3719.08	3396.67	4993.74	0.556173	2.02039e-06	Gars	glycyl-tRNA synthetase [Source:MGI Symbol;Acc:MGI:2449057]
ENSMUSG00000041423	64.2119	115.897	87.683	94.2795	36.2067	29.2292	29.2995	41.8764	34.1529	90.5179	1.41099	2.04912e-06	Paqr6	progestin and adipoQ receptor family member VI [Source:MGI Symbol;Acc:MGI:1916207]
ENSMUSG00000041120	181.934	197.212	178.39	168.656	101.193	113.785	71.4176	78.0938	91.1224	181.548	0.995429	2.04992e-06	Nbl1	neuroblastoma, suppression of tumorigenicity 1 [Source:MGI Symbol;Acc:MGI:104591]
ENSMUSG00000021951	169.286	174.78	214.672	237.794	345.356	343.443	320.463	368.965	344.557	199.133	-0.792023	2.0704e-06	Eef1akmt1	EEF1A alpha lysine methyltransferase 1 [Source:MGI Symbol;Acc:MGI:1915293]
ENSMUSG00000046916	55.4557	104.681	76.5966	120.468	209.813	187.902	204.181	244.468	211.591	89.3005	-1.24491	2.09961e-06	Myct1	myc target 1 [Source:MGI Symbol;Acc:MGI:1915882]
ENSMUSG00000022110	22921.7	25159.9	23405.3	23705	33493	33985.2	39385	30668.2	34382.9	23798	-0.530873	2.1264e-06	Sucla2	succinate-Coenzyme A ligase, ADP-forming, beta subunit [Source:MGI Symbol;Acc:MGI:1306775]
ENSMUSG00000005374	276.306	357.972	363.834	390.736	507.822	593.979	648.252	617.96	592.003	347.212	-0.770029	2.1427e-06	Tbl2	transducin (beta)-like 2 [Source:MGI Symbol;Acc:MGI:1351652]
ENSMUSG00000044763	456.294	496.301	450.509	526.918	678.643	730.73	920.188	782.07	777.908	482.505	-0.689453	2.2491e-06	Trmt10c	tRNA methyltransferase 10C [Source:MGI Symbol;Acc:MGI:1196261]
ENSMUSG00000022821	49.6183	26.1703	22.1727	17.8083	1.85675	2.0878	5.49366	2.26359	2.92545	28.9424	3.28728	2.26872e-06	Hgd	homogentisate 1, 2-dioxygenase [Source:MGI Symbol;Acc:MGI:96078]
ENSMUSG00000030057	10270	9905.46	10218.6	9225.77	6754.86	7494.16	7762.54	7178.97	7297.63	9904.96	0.440737	2.2767e-06	Cnbp	cellular nucleic acid binding protein [Source:MGI Symbol;Acc:MGI:88431]
ENSMUSG00000062270	3277.73	3175.02	3461.97	3100.75	2480.62	2456.3	2475.81	2529.56	2485.57	3253.86	0.388647	2.29542e-06	Morf4l1	mortality factor 4 like 1 [Source:MGI Symbol;Acc:MGI:1096551]
ENSMUSG00000032231	2658.96	2507.68	1656.91	2612.59	7651.68	5011.76	3479.32	6018.88	5540.41	2359.03	-1.23177	2.30823e-06	Anxa2	annexin A2 [Source:MGI Symbol;Acc:MGI:88246]
ENSMUSG00000022792	454.348	487.889	462.603	404.354	662.861	693.15	636.349	779.806	693.041	452.299	-0.613952	2.32671e-06	Yars2	tyrosyl-tRNA synthetase 2 (mitochondrial) [Source:MGI Symbol;Acc:MGI:1917370]
ENSMUSG00000031711	801.676	843.992	775.037	668.337	475.329	405.033	466.961	552.316	474.91	772.26	0.702527	2.3506e-06	Zfp330	zinc finger protein 330 [Source:MGI Symbol;Acc:MGI:1353574]
ENSMUSG00000029036	5696.37	5771.49	5141.05	5548.87	2838.05	3472.01	3870.28	3932.99	3528.33	5539.44	0.650916	2.3592e-06	Atad3a	ATPase family, AAA domain containing 3A [Source:MGI Symbol;Acc:MGI:1919214]
ENSMUSG00000053398	784.163	1126.26	671.228	736.427	388.99	440.526	447.733	271.631	387.22	829.519	1.0984	2.4082e-06	Phgdh	3-phosphoglycerate dehydrogenase [Source:MGI Symbol;Acc:MGI:1355330]
ENSMUSG00000001962	912.587	1005.69	1000.8	1011.93	580.235	664.964	645.505	745.852	659.139	982.751	0.577489	2.43015e-06	Fam50a	family with sequence similarity 50, member A [Source:MGI Symbol;Acc:MGI:1351626]
ENSMUSG00000001588	13.6207	15.8891	17.1335	15.7132	39.9202	44.8877	50.3585	69.0395	51.0515	15.5891	-1.70684	2.43326e-06	Acap1	ArfGAP with coiled-coil, ankyrin repeat and PH domains 1 [Source:MGI Symbol;Acc:MGI:2388270]
ENSMUSG00000000942	176.096	172.911	194.515	193.797	259.017	359.102	336.029	421.027	343.794	184.33	-0.897778	2.48304e-06	Hoxa4	homeobox A4 [Source:MGI Symbol;Acc:MGI:96176]
ENSMUSG00000022377	869.779	870.163	910.089	898.798	631.296	676.447	558.522	621.355	621.905	887.207	0.513166	2.51779e-06	Asap1	ArfGAP with SH3 domain, ankyrin repeat and PH domain1 [Source:MGI Symbol;Acc:MGI:1342335]
ENSMUSG00000021215	9875.01	6419.2	5731.65	5814.95	2514.97	3793.53	3121.31	1643.37	2768.3	6960.2	1.33006	2.57014e-06	Net1	neuroepithelial cell transforming gene 1 [Source:MGI Symbol;Acc:MGI:1927138]
ENSMUSG00000018417	2513.02	1532.83	1763.74	1645.7	949.729	1036.59	871.661	563.634	855.404	1863.82	1.12317	2.57678e-06	Myo1b	myosin IB [Source:MGI Symbol;Acc:MGI:107752]
ENSMUSG00000026574	618.769	532.753	596.647	410.64	1318.29	1152.47	940.331	826.21	1059.33	539.702	-0.972985	2.58233e-06	Dpt	dermatopontin [Source:MGI Symbol;Acc:MGI:1928392]
ENSMUSG00000031709	101.182	92.5307	83.6516	105.803	235.808	168.068	155.654	227.491	196.755	95.7918	-1.03794	2.58233e-06	Tbc1d9	TBC1 domain family, member 9 [Source:MGI Symbol;Acc:MGI:1918560]
ENSMUSG00000004947	310.358	370.123	326.544	424.258	711.136	493.765	721.501	820.551	686.738	357.82	-0.940718	2.6118e-06	Dtx2	deltex 2, E3 ubiquitin ligase [Source:MGI Symbol;Acc:MGI:1921448]
ENSMUSG00000021178	4039.51	3674.12	3836.89	4173.44	2825.98	2904.13	2711.12	3080.74	2880.49	3930.99	0.448777	2.66354e-06	Psmc1	protease (prosome, macropain) 26S subunit, ATPase 1 [Source:MGI Symbol;Acc:MGI:106054]
ENSMUSG00000044811	11.6749	1.86931	4.0314	3.14265	121.617	41.756	22.8902	35.0856	55.3373	5.17956	-3.41767	2.74862e-06	Cd300c2	CD300C molecule 2 [Source:MGI Symbol;Acc:MGI:2153249]
ENSMUSG00000030560	290.899	239.271	269.096	222.081	952.514	557.443	418.434	517.23	611.405	255.337	-1.26	2.81984e-06	Ctsc	cathepsin C [Source:MGI Symbol;Acc:MGI:109553]
ENSMUSG00000042793	407.648	997.276	587.577	716.524	3156.48	1370.64	1400.88	2248.88	2044.22	677.256	-1.59369	2.85443e-06	Lgr6	leucine-rich repeat-containing G protein-coupled receptor 6 [Source:MGI Symbol;Acc:MGI:2441805]
ENSMUSG00000026304	56.4286	65.4258	39.3062	51.3299	4.64188	20.878	2.74683	5.65897	8.48142	53.1226	2.66431	2.8946e-06	Rab17	RAB17, member RAS oncogene family [Source:MGI Symbol;Acc:MGI:104640]
ENSMUSG00000026234	5364.61	4647.1	4880.01	4765.3	3356.08	3728.81	3610.25	3094.33	3447.37	4914.26	0.511344	2.90465e-06	Ncl	nucleolin [Source:MGI Symbol;Acc:MGI:97286]
ENSMUSG00000035399	463.104	384.143	446.478	503.871	259.017	246.36	278.345	310.112	273.459	449.399	0.717082	2.91076e-06	Oser1	oxidative stress responsive serine rich 1 [Source:MGI Symbol;Acc:MGI:1913930]
ENSMUSG00000005936	1837.82	1963.71	2071.13	1891.87	1380.5	1432.23	1465.89	1491.7	1442.58	1941.13	0.428474	2.94582e-06	Kctd20	potassium channel tetramerisation domain containing 20 [Source:MGI Symbol;Acc:MGI:1914239]
ENSMUSG00000021846	2945.96	3120.81	2812.91	2231.28	1261.66	1621.18	1822.98	1098.97	1451.2	2777.74	0.936432	3.00733e-06	Peli2	pellino 2 [Source:MGI Symbol;Acc:MGI:1891445]
ENSMUSG00000038690	12971.8	12408.5	12975.1	12014.3	16399.8	17786	18427.6	15784	17099.3	12592.4	-0.441414	3.10902e-06	Atp5j2	ATP synthase, H+ transporting, mitochondrial F0 complex, subunit F2 [Source:MGI Symbol;Acc:MGI:1927558]
ENSMUSG00000037712	5168.08	4651.77	4455.71	3960.79	3357.94	2963.63	2977.56	3008.31	3076.86	4559.09	0.56728	3.12564e-06	Fermt2	fermitin family member 2 [Source:MGI Symbol;Acc:MGI:2385001]
ENSMUSG00000038264	1443.79	1909.5	1903.83	1903.4	1143.76	915.5	1221.42	1038.99	1079.92	1790.13	0.728612	3.12852e-06	Sema7a	sema domain, immunoglobulin domain (Ig), and GPI membrane anchor, (semaphorin) 7A [Source:MGI Symbol;Acc:MGI:1306826]
ENSMUSG00000028495	5946.41	5736.9	6318.21	5903.99	4228.75	4362.46	4665.95	3776.8	4258.49	5976.38	0.488694	3.15392e-06	Rps6	ribosomal protein S6 [Source:MGI Symbol;Acc:MGI:98159]
ENSMUSG00000029575	797.784	771.089	779.068	1027.65	1365.64	1409.26	1210.44	1608.28	1398.41	843.897	-0.728561	3.16643e-06	Mmab	methylmalonic aciduria (cobalamin deficiency) cblB type homolog (human) [Source:MGI Symbol;Acc:MGI:1924947]
ENSMUSG00000030275	1793.07	1431.89	1344.47	1513.71	2562.32	2677.6	2622.31	2037.23	2474.86	1520.79	-0.702736	3.23085e-06	Etnk1	ethanolamine kinase 1 [Source:MGI Symbol;Acc:MGI:1922570]
ENSMUSG00000023707	1299.8	1195.42	1206.4	1192.11	814.186	889.403	904.623	932.599	885.202	1223.43	0.467495	3.26053e-06	Ogfod2	2-oxoglutarate and iron-dependent oxygenase domain containing 2 [Source:MGI Symbol;Acc:MGI:1913877]
ENSMUSG00000039887	428.079	408.444	394.07	414.83	572.808	566.838	604.303	573.82	579.442	411.356	-0.494605	3.29159e-06	Alg14	asparagine-linked glycosylation 14 [Source:MGI Symbol;Acc:MGI:1914039]
ENSMUSG00000030257	173.178	174.78	107.84	234.651	33.4215	30.2731	75.9956	66.7759	51.6165	172.612	1.74166	3.35041e-06	Srgap3	SLIT-ROBO Rho GTPase activating protein 3 [Source:MGI Symbol;Acc:MGI:2152938]
ENSMUSG00000063253	731.626	834.646	716.582	819.184	1138.19	1094.01	1099.65	1050.31	1095.54	775.509	-0.498678	3.35041e-06	Scoc	short coiled-coil protein [Source:MGI Symbol;Acc:MGI:1927654]
ENSMUSG00000051098	195.554	225.252	199.554	189.607	380.634	333.004	323.21	293.135	332.496	202.492	-0.716053	3.39891e-06	Mblac2	metallo-beta-lactamase domain containing 2 [Source:MGI Symbol;Acc:MGI:1920102]
ENSMUSG00000030790	80.7513	91.5961	119.934	67.0432	38.0634	30.2731	29.2995	40.7446	34.5952	89.8312	1.38035	3.42311e-06	Adm	adrenomedullin [Source:MGI Symbol;Acc:MGI:108058]
ENSMUSG00000005873	3901.36	4087.24	3768.35	3530.24	4822.91	5362.51	5546.76	5306.98	5259.79	3821.8	-0.460612	3.46177e-06	Reep5	receptor accessory protein 5 [Source:MGI Symbol;Acc:MGI:1270152]
ENSMUSG00000070348	38.9163	35.5168	49.3847	40.8544	217.24	138.839	56.7678	226.359	159.801	41.1681	-1.956	3.46177e-06	Ccnd1	cyclin D1 [Source:MGI Symbol;Acc:MGI:88313]
ENSMUSG00000026037	770.543	628.087	636.961	626.435	472.543	406.077	427.59	371.229	419.36	665.507	0.664941	3.48421e-06	Orc2	origin recognition complex, subunit 2 [Source:MGI Symbol;Acc:MGI:1328306]
ENSMUSG00000115099	23.3498	36.4515	26.2041	19.9034	64.9863	80.3803	108.958	61.1169	78.8603	26.4772	-1.57292	3.53476e-06	AC114585.1	novel transcript
ENSMUSG00000034108	1940.95	2041.28	1911.89	1905.49	1278.37	1371.68	1314.82	1560.74	1381.4	1949.9	0.498129	3.55066e-06	Ccs	copper chaperone for superoxide dismutase [Source:MGI Symbol;Acc:MGI:1333783]
ENSMUSG00000014418	493.264	542.099	552.302	499.681	785.406	747.432	785.593	686.999	751.358	521.837	-0.526658	3.55066e-06	Hps5	HPS5, biogenesis of lysosomal organelles complex 2 subunit 2 [Source:MGI Symbol;Acc:MGI:2180307]
ENSMUSG00000073940	28.2143	85.0535	76.5966	33.5216	279.441	321.521	100.717	252.39	238.517	55.8465	-2.09247	3.62782e-06	Hbb-bt	hemoglobin, beta adult t chain [Source:MGI Symbol;Acc:MGI:5474850]
ENSMUSG00000029649	1361.1	1358.99	1341.45	1477.05	1893.89	1850.83	1769.87	1825.58	1835.04	1384.64	-0.406487	3.88494e-06	Pomp	proteasome maturation protein [Source:MGI Symbol;Acc:MGI:1913787]
ENSMUSG00000044864	1563.46	1376.74	1099.56	1972.54	801.189	548.047	845.108	752.643	736.747	1503.08	1.02822	3.89288e-06	Ankrd50	ankyrin repeat domain 50 [Source:MGI Symbol;Acc:MGI:2139777]
ENSMUSG00000031796	432.944	494.432	443.454	413.782	314.72	288.116	292.08	292.003	296.73	446.153	0.588463	3.89315e-06	Cfap20	cilia and flagella associated protein 20 [Source:MGI Symbol;Acc:MGI:107428]
ENSMUSG00000031286	63.239	46.7327	49.3847	58.6628	14.854	18.7902	19.2278	23.7677	19.1599	54.5048	1.51618	3.91295e-06	Glt28d2	glycosyltransferase 28 domain containing 2 [Source:MGI Symbol;Acc:MGI:2443773]
ENSMUSG00000044700	1366.94	1512.27	1486.58	1396.38	876.387	991.705	898.213	1118.21	971.13	1440.54	0.570027	3.97688e-06	Tmem201	transmembrane protein 201 [Source:MGI Symbol;Acc:MGI:1196277]
ENSMUSG00000025203	783.191	609.394	582.538	1221.44	7758.44	3777.87	1742.41	11330.4	6152.28	799.141	-2.94463	3.99004e-06	Scd2	stearoyl-Coenzyme A desaturase 2 [Source:MGI Symbol;Acc:MGI:98240]
ENSMUSG00000079227	5.83745	4.67327	18.1413	7.33285	351.855	102.302	53.1054	73.5666	145.207	8.99622	-4.01585	4.0408e-06	Ccr5	chemokine (C-C motif) receptor 5 [Source:MGI Symbol;Acc:MGI:107182]
ENSMUSG00000115338	790.974	791.652	678.283	670.432	1027.71	1060.6	1332.21	1189.52	1152.51	732.835	-0.652935	4.05045e-06	Pnp	purine-nucleoside phosphorylase [Source:MGI Symbol;Acc:MGI:97365]
ENSMUSG00000033488	499.102	499.105	494.855	568.82	696.282	736.993	799.327	855.637	772.06	515.47	-0.582606	4.08299e-06	Cryzl2	crystallin zeta like 2 [Source:MGI Symbol;Acc:MGI:2448516]
ENSMUSG00000023473	28.2143	28.0396	30.2355	48.1873	141.113	77.2486	70.502	124.497	103.34	33.6692	-1.62084	4.0916e-06	Celsr3	cadherin, EGF LAG seven-pass G-type receptor 3 [Source:MGI Symbol;Acc:MGI:1858236]
ENSMUSG00000004798	800.703	880.444	867.759	797.185	1162.33	1172.3	1287.35	1095.58	1179.39	836.523	-0.495937	4.09987e-06	Ulk2	unc-51 like kinase 2 [Source:MGI Symbol;Acc:MGI:1352758]
ENSMUSG00000046185	145.936	168.238	156.217	145.609	235.808	273.502	249.046	241.072	249.857	154	-0.696908	4.10105e-06	Zfp84	zinc finger protein 84 [Source:MGI Symbol;Acc:MGI:107780]
ENSMUSG00000015120	2252.28	1911.37	1931.04	1895.02	1280.23	1342.46	1432.93	1488.31	1385.98	1997.43	0.527579	4.14403e-06	Ube2i	ubiquitin-conjugating enzyme E2I [Source:MGI Symbol;Acc:MGI:107365]
ENSMUSG00000020437	32.1059	26.1703	27.212	31.4265	223.739	88.7315	56.7678	105.257	118.624	29.2287	-2.02253	4.15093e-06	Myo1g	myosin IG [Source:MGI Symbol;Acc:MGI:1927091]
ENSMUSG00000031351	40.8621	43.9287	44.3454	54.4726	92.8376	128.4	248.13	108.652	144.505	45.9022	-1.65755	4.15694e-06	Zfp185	zinc finger protein 185 [Source:MGI Symbol;Acc:MGI:108095]
ENSMUSG00000040794	172.205	178.519	219.711	178.083	51.0607	75.1608	114.451	79.2256	79.9746	187.13	1.22511	4.17505e-06	C1qtnf4	C1q and tumor necrosis factor related protein 4 [Source:MGI Symbol;Acc:MGI:1914695]
ENSMUSG00000028607	8125.72	8807.24	8031.56	9973.72	11760.7	12322.2	12926.6	13570.2	12644.9	8734.56	-0.533748	4.42993e-06	Cpt2	carnitine palmitoyltransferase 2 [Source:MGI Symbol;Acc:MGI:109176]
ENSMUSG00000026417	17.5123	38.3208	26.2041	29.3314	4.64188	3.1317	0	5.65897	3.35814	27.8422	3.08524	4.48376e-06	Pigr	polymeric immunoglobulin receptor [Source:MGI Symbol;Acc:MGI:103080]
ENSMUSG00000031765	20660.7	17762.2	21952	22483.6	12539.6	10055.9	15000.4	9891.88	11871.9	20714.6	0.803008	4.50028e-06	Mt1	metallothionein 1 [Source:MGI Symbol;Acc:MGI:97171]
ENSMUSG00000031659	65.1848	55.1446	78.6123	48.1873	265.516	143.014	119.945	151.66	170.034	61.7822	-1.46145	4.55482e-06	Adcy7	adenylate cyclase 7 [Source:MGI Symbol;Acc:MGI:102891]
ENSMUSG00000029642	1933.17	1944.08	2020.74	2002.92	2417.49	2603.49	2609.49	2665.38	2573.96	1975.23	-0.381831	4.57068e-06	Polr1d	polymerase (RNA) I polypeptide D [Source:MGI Symbol;Acc:MGI:108403]
ENSMUSG00000002948	1069.23	1112.24	1166.08	1134.5	781.693	809.022	851.517	860.164	825.599	1120.51	0.440867	4.62276e-06	Map2k7	mitogen-activated protein kinase kinase 7 [Source:MGI Symbol;Acc:MGI:1346871]
ENSMUSG00000035776	1364.99	1346.84	1523.87	1369.15	1885.53	1983.41	2426.37	2032.7	2082	1401.21	-0.571545	4.63759e-06	Cd99l2	CD99 antigen-like 2 [Source:MGI Symbol;Acc:MGI:2177151]
ENSMUSG00000025804	14.5936	3.73861	5.03925	6.2853	198.672	28.1853	38.4556	43.0082	77.0804	7.41419	-3.37977	4.68305e-06	Ccr1	chemokine (C-C motif) receptor 1 [Source:MGI Symbol;Acc:MGI:104618]
ENSMUSG00000025193	588.609	541.165	540.208	500.729	282.226	341.355	397.375	310.112	332.767	542.678	0.705028	4.80029e-06	Cutc	cutC copper transporter [Source:MGI Symbol;Acc:MGI:1913638]
ENSMUSG00000028907	1024.47	1026.25	986.686	1024.5	799.332	732.818	674.804	674.549	720.376	1015.48	0.494813	4.80044e-06	Utp11	UTP11 small subunit processome component [Source:MGI Symbol;Acc:MGI:1914455]
ENSMUSG00000030527	433.917	535.557	516.019	507.014	324.932	293.336	317.717	354.252	322.559	498.127	0.627681	4.85193e-06	Crtc3	CREB regulated transcription coactivator 3 [Source:MGI Symbol;Acc:MGI:1917711]
ENSMUSG00000024661	52906.7	46570.1	48686.2	49454.8	37435.8	39013.7	37641.6	38818.3	38227.4	49404.5	0.370044	4.85459e-06	Fth1	ferritin heavy polypeptide 1 [Source:MGI Symbol;Acc:MGI:95588]
ENSMUSG00000032315	395.973	482.281	657.118	623.292	244.163	229.658	183.122	332.748	247.423	539.666	1.12676	4.85462e-06	Cyp1a1	cytochrome P450, family 1, subfamily a, polypeptide 1 [Source:MGI Symbol;Acc:MGI:88588]
ENSMUSG00000030711	3290.37	3330.17	3108.21	3119.6	1379.57	1561.67	2170.91	940.521	1513.17	3212.09	1.08551	4.8667e-06	Sult1a1	sulfotransferase family 1A, phenol-preferring, member 1 [Source:MGI Symbol;Acc:MGI:102896]
ENSMUSG00000024978	7252.05	4665.79	4806.44	5154.99	11238.9	9642.5	10593.6	8205.51	9920.13	5469.82	-0.858913	4.9385e-06	Gpam	glycerol-3-phosphate acyltransferase, mitochondrial [Source:MGI Symbol;Acc:MGI:109162]
ENSMUSG00000022504	14.5936	17.7584	25.1963	7.33285	109.548	50.1072	49.4429	65.6441	68.6856	16.2203	-2.0806	4.9385e-06	Ciita	class II transactivator [Source:MGI Symbol;Acc:MGI:108445]
ENSMUSG00000037152	3401.28	3486.26	4012.25	3829.84	4894.4	5304.06	5106.36	4904.06	5052.22	3682.41	-0.456376	5.03547e-06	Ndufc1	NADH:ubiquinone oxidoreductase subunit C1 [Source:MGI Symbol;Acc:MGI:1913627]
ENSMUSG00000039911	1723.99	1833.79	2146.72	1025.55	807.687	921.764	712.344	802.442	811.059	1682.51	1.05303	5.22734e-06	Spsb1	splA/ryanodine receptor domain and SOCS box containing 1 [Source:MGI Symbol;Acc:MGI:1921896]
ENSMUSG00000009406	278.252	259.834	237.853	233.604	378.777	366.409	410.193	382.546	384.482	252.385	-0.606948	5.2444e-06	Elk1	ELK1, member of ETS oncogene family [Source:MGI Symbol;Acc:MGI:101833]
ENSMUSG00000004562	1022.53	1269.26	1112.67	1181.64	1597.74	1855.01	1579.43	1941.03	1743.3	1146.52	-0.603989	5.24869e-06	Arhgef40	Rho guanine nucleotide exchange factor (GEF) 40 [Source:MGI Symbol;Acc:MGI:2685515]
ENSMUSG00000001657	53.5099	61.6871	78.6123	90.0893	135.543	150.322	143.751	144.87	143.621	70.9747	-1.01992	5.26901e-06	Hoxc8	homeobox C8 [Source:MGI Symbol;Acc:MGI:96198]
ENSMUSG00000026548	7.78326	6.54258	13.1021	4.1902	44.5621	38.6243	23.8059	41.8764	37.2171	7.90452	-2.2318	5.26901e-06	Slamf9	SLAM family member 9 [Source:MGI Symbol;Acc:MGI:1923692]
ENSMUSG00000032641	129.397	144.871	127.997	165.513	80.7687	80.3803	69.5863	69.0395	74.9437	141.944	0.919822	5.27903e-06	Gpr19	G protein-coupled receptor 19 [Source:MGI Symbol;Acc:MGI:892973]
ENSMUSG00000031903	468.941	509.386	544.239	509.109	737.131	709.852	792.918	952.971	798.218	507.919	-0.651504	5.28883e-06	Pla2g15	phospholipase A2, group XV [Source:MGI Symbol;Acc:MGI:2178076]
ENSMUSG00000022540	504.939	650.519	608.742	593.961	340.714	386.243	379.978	410.841	379.444	589.54	0.63697	5.40094e-06	Rogdi	rogdi homolog [Source:MGI Symbol;Acc:MGI:1913299]
ENSMUSG00000001052	1332.88	1192.62	1322.3	1297.91	881.957	932.203	932.091	1000.51	936.689	1286.43	0.458219	5.42788e-06	Sec24b	Sec24 related gene family, member B (S. cerevisiae) [Source:MGI Symbol;Acc:MGI:2139764]
ENSMUSG00000049295	795.838	958.02	910.089	1070.6	1315.51	1461.46	1514.42	1802.95	1523.58	933.636	-0.706298	5.46654e-06	Zfp219	zinc finger protein 219 [Source:MGI Symbol;Acc:MGI:1917140]
ENSMUSG00000021704	836.701	654.258	677.275	602.341	1244.95	1238.07	1355.1	939.389	1194.38	692.644	-0.786437	5.46925e-06	Mtx3	metaxin 3 [Source:MGI Symbol;Acc:MGI:2686040]
ENSMUSG00000062014	1548.87	1373.01	1155	1386.96	2088.85	2250.65	2053.71	1886.7	2069.98	1365.96	-0.599718	5.53972e-06	Gmfb	glia maturation factor, beta [Source:MGI Symbol;Acc:MGI:1927133]
ENSMUSG00000021607	633.363	743.984	791.163	744.808	1012.86	1017.8	1185.71	1203.1	1104.87	728.329	-0.601154	5.59543e-06	Mrpl36	mitochondrial ribosomal protein L36 [Source:MGI Symbol;Acc:MGI:2137228]
ENSMUSG00000041653	2173.48	1939.41	2443.03	4293.91	8014.67	6094.29	4689.75	8144.39	6735.78	2712.45	-1.31232	5.59543e-06	Pnpla3	patatin-like phospholipase domain containing 3 [Source:MGI Symbol;Acc:MGI:2151796]
ENSMUSG00000027984	20523.5	21477.4	21934.9	21662.3	25892.4	32424.6	30760.8	30321.9	29849.9	21399.5	-0.480135	5.65733e-06	Hadh	hydroxyacyl-Coenzyme A dehydrogenase [Source:MGI Symbol;Acc:MGI:96009]
ENSMUSG00000069805	128.424	71.9683	137.068	81.7089	29.708	44.8877	20.1434	40.7446	33.8709	104.792	1.6375	5.6788e-06	Fbp1	fructose bisphosphatase 1 [Source:MGI Symbol;Acc:MGI:95492]
ENSMUSG00000031444	5.83745	2.80396	7.05495	5.23775	77.0552	20.878	21.059	40.7446	39.9342	5.23353	-2.93884	5.70132e-06	F10	coagulation factor X [Source:MGI Symbol;Acc:MGI:103107]
ENSMUSG00000002748	2504.26	2632.92	2628.47	2837.81	3482.34	3535.69	3668.85	3346.72	3508.4	2650.87	-0.404622	5.71062e-06	Baz1b	bromodomain adjacent to zinc finger domain, 1B [Source:MGI Symbol;Acc:MGI:1353499]
ENSMUSG00000078566	18426.9	12375.7	12825.9	11462.3	7355.52	6581.79	8479.46	4852	6817.19	13772.7	1.01448	5.76265e-06	Bnip3	BCL2/adenovirus E1B interacting protein 3 [Source:MGI Symbol;Acc:MGI:109326]
ENSMUSG00000103149	13.6207	17.7584	25.1963	39.8069	54.7742	88.7315	83.3205	114.311	85.2844	24.0956	-1.8272	5.80692e-06	AA914427	EST AA914427 [Source:MGI Symbol;Acc:MGI:1858439]
ENSMUSG00000016758	38.9163	65.4258	67.526	70.1858	26.9229	14.6146	15.5654	18.1087	18.8029	60.5135	1.68055	5.94728e-06	Bik	BCL2-interacting killer [Source:MGI Symbol;Acc:MGI:1206591]
ENSMUSG00000058833	1184.03	1237.48	1188.26	1292.68	1641.37	1599.25	1682.89	1898.02	1705.38	1225.61	-0.47628	6.11567e-06	Rex1bd	required for excision 1-B domain containing [Source:MGI Symbol;Acc:MGI:1913712]
ENSMUSG00000041132	1286.18	1399.18	1261.83	1303.15	973.867	1025.11	946.741	965.421	977.784	1312.59	0.425199	6.16622e-06	N4bp2l1	NEDD4 binding protein 2-like 1 [Source:MGI Symbol;Acc:MGI:2140872]
ENSMUSG00000001424	1412.66	2338.5	1885.69	2355.94	1056.49	1125.32	1034.64	1201.97	1104.61	1998.2	0.855387	6.24592e-06	Snd1	staphylococcal nuclease and tudor domain containing 1 [Source:MGI Symbol;Acc:MGI:1929266]
ENSMUSG00000066551	5850.09	5335	5193.45	4858.54	3097.06	3645.3	4032.35	3102.25	3469.24	5309.27	0.613798	6.34381e-06	Hmgb1	high mobility group box 1 [Source:MGI Symbol;Acc:MGI:96113]
ENSMUSG00000032577	337.599	300.024	356.779	338.359	505.037	525.082	508.163	707.371	561.413	333.19	-0.751622	6.37582e-06	Mapkapk3	mitogen-activated protein kinase-activated protein kinase 3 [Source:MGI Symbol;Acc:MGI:2143163]
ENSMUSG00000033720	1015.72	1209.44	1278.96	1394.29	1966.3	1992.8	1734.17	2443.54	2034.2	1224.6	-0.731968	6.38422e-06	Sfxn5	sideroflexin 5 [Source:MGI Symbol;Acc:MGI:2137681]
ENSMUSG00000022040	14791.1	13863.7	14055.5	14805	7730.59	9747.94	11053.2	9122.26	9413.51	14378.8	0.611125	6.41106e-06	Ephx2	epoxide hydrolase 2, cytoplasmic [Source:MGI Symbol;Acc:MGI:99500]
ENSMUSG00000070372	1065.33	1070.18	978.623	1069.55	1487.26	1321.58	1407.29	1461.15	1419.32	1045.92	-0.440424	6.5559e-06	Capza1	capping protein (actin filament) muscle Z-line, alpha 1 [Source:MGI Symbol;Acc:MGI:106227]
ENSMUSG00000017639	28.2143	21.497	11.0864	20.951	76.1268	73.073	43.0337	73.5666	66.45	20.4372	-1.69647	6.5639e-06	Rab11fip4	RAB11 family interacting protein 4 (class II) [Source:MGI Symbol;Acc:MGI:2442920]
ENSMUSG00000015957	564.286	671.081	683.323	451.494	242.306	378.936	165.725	233.15	255.029	592.546	1.21756	6.59911e-06	Wnt11	wingless-type MMTV integration site family, member 11 [Source:MGI Symbol;Acc:MGI:101948]
ENSMUSG00000048142	2138.45	2233.82	2408.76	3747.09	3966.95	5531.63	6259.11	7596.6	5838.57	2632.03	-1.14947	6.6937e-06	Nat8l	N-acetyltransferase 8-like [Source:MGI Symbol;Acc:MGI:2447776]
ENSMUSG00000020829	81.7242	112.158	98.7693	86.9466	143.898	185.814	221.578	244.468	198.939	94.8997	-1.06514	6.78244e-06	Slc46a1	solute carrier family 46, member 1 [Source:MGI Symbol;Acc:MGI:1098733]
ENSMUSG00000041263	211.121	262.638	245.916	227.318	141.113	146.146	135.51	153.924	144.173	236.748	0.717996	6.78852e-06	Rusc1	RUN and SH3 domain containing 1 [Source:MGI Symbol;Acc:MGI:1919546]
ENSMUSG00000038963	42.8079	79.4456	55.4318	69.1383	236.736	178.507	100.717	456.113	243.018	61.7059	-1.97571	6.83238e-06	Slco4a1	solute carrier organic anion transporter family, member 4a1 [Source:MGI Symbol;Acc:MGI:1351866]
ENSMUSG00000026639	533.153	480.412	346.701	490.253	280.37	228.614	260.949	173.165	235.774	462.63	0.970101	6.83428e-06	Lamb3	laminin, beta 3 [Source:MGI Symbol;Acc:MGI:99915]
ENSMUSG00000026676	179.015	165.434	137.068	111.04	327.717	425.911	215.168	397.26	341.514	148.139	-1.20251	6.89636e-06	Ccdc3	coiled-coil domain containing 3 [Source:MGI Symbol;Acc:MGI:1921436]
ENSMUSG00000021767	927.181	955.216	947.379	873.657	603.444	573.101	713.26	512.703	600.627	925.858	0.622927	6.91345e-06	Kat6b	K(lysine) acetyltransferase 6B [Source:MGI Symbol;Acc:MGI:1858746]
ENSMUSG00000068923	136.207	180.388	183.429	215.795	296.152	303.775	317.717	328.22	311.466	178.955	-0.80036	6.92938e-06	Syt11	synaptotagmin XI [Source:MGI Symbol;Acc:MGI:1859547]
ENSMUSG00000039620	336.626	434.614	355.771	478.73	232.094	216.087	260.949	215.041	231.043	401.435	0.795246	6.95989e-06	Trmt9b	tRNA methyltransferase 9B [Source:MGI Symbol;Acc:MGI:2442328]
ENSMUSG00000024668	766.651	784.174	818.375	843.278	1023.07	1091.92	1127.12	1122.74	1091.21	803.119	-0.442309	7.11995e-06	Sdhaf2	succinate dehydrogenase complex assembly factor 2 [Source:MGI Symbol;Acc:MGI:1913322]
ENSMUSG00000035385	10.702	10.2812	12.0942	9.42795	358.353	26.0975	101.633	112.048	149.533	10.6263	-3.8153	7.29556e-06	Ccl2	chemokine (C-C motif) ligand 2 [Source:MGI Symbol;Acc:MGI:98259]
ENSMUSG00000070544	1249.21	1207.57	1232.6	1276.96	1709.14	1731.83	1736	1517.74	1673.68	1241.59	-0.431436	7.39623e-06	Top1	topoisomerase (DNA) I [Source:MGI Symbol;Acc:MGI:98788]
ENSMUSG00000035184	216.958	243.945	207.617	177.036	105.835	109.609	45.7805	53.1943	78.6048	211.389	1.42686	7.43491e-06	Fam124a	family with sequence similarity 124, member A [Source:MGI Symbol;Acc:MGI:3645930]
ENSMUSG00000046806	197.5	271.05	259.018	236.746	151.325	139.883	137.341	131.288	139.959	241.078	0.783458	7.53302e-06	Cyren	cell cycle regulator of NHEJ [Source:MGI Symbol;Acc:MGI:1925662]
ENSMUSG00000080316	296.737	361.711	369.881	401.212	510.607	548.047	655.577	634.937	587.292	357.385	-0.716866	7.53302e-06	Spaca6	sperm acrosome associated 6 [Source:MGI Symbol;Acc:MGI:1922452]
ENSMUSG00000036225	278.252	320.586	302.355	356.167	513.392	445.745	469.708	550.052	494.724	314.34	-0.654281	7.55776e-06	Kctd1	potassium channel tetramerisation domain containing 1 [Source:MGI Symbol;Acc:MGI:1918269]
ENSMUSG00000001128	164.421	174.78	194.515	150.847	488.326	334.048	256.371	330.484	352.307	171.141	-1.0418	7.62491e-06	Cfp	complement factor properdin [Source:MGI Symbol;Acc:MGI:97545]
ENSMUSG00000036534	516.614	548.642	486.792	552.059	277.584	323.609	342.438	387.074	332.676	526.027	0.662914	7.78552e-06	Slc38a7	solute carrier family 38, member 7 [Source:MGI Symbol;Acc:MGI:2679005]
ENSMUSG00000041915	754.003	704.729	695.417	655.766	904.238	1015.71	1041.05	985.793	986.699	702.479	-0.489749	7.78552e-06	Ammecr1l	AMME chromosomal region gene 1-like [Source:MGI Symbol;Acc:MGI:2442711]
ENSMUSG00000026701	5942.52	6784.65	7013.63	7959.28	4215.76	4830.13	4924.15	4621.12	4647.79	6925.02	0.575239	7.83567e-06	Prdx6	peroxiredoxin 6 [Source:MGI Symbol;Acc:MGI:894320]
ENSMUSG00000033059	1530.38	1633.77	1471.46	1474.95	1869.75	2597.22	2794.44	2694.8	2489.05	1527.64	-0.70405	7.8838e-06	Pygb	brain glycogen phosphorylase [Source:MGI Symbol;Acc:MGI:97828]
ENSMUSG00000029641	72.9681	101.877	95.7458	89.0417	30.6364	14.6146	25.6371	48.6672	29.8888	89.9082	1.59673	7.98665e-06	Rasl11a	RAS-like, family 11, member A [Source:MGI Symbol;Acc:MGI:1916145]
ENSMUSG00000021591	855.186	757.07	571.451	964.793	455.833	287.072	456.889	336.143	383.984	787.125	1.03414	8.06904e-06	Glrx	glutaredoxin [Source:MGI Symbol;Acc:MGI:2135625]
ENSMUSG00000020674	1109.11	1299.17	1328.35	1053.84	2190.04	2212.02	1560.2	1976.11	1984.59	1197.62	-0.728414	8.10687e-06	Pxdn	peroxidasin [Source:MGI Symbol;Acc:MGI:1916925]
ENSMUSG00000028664	10.702	8.41188	3.02355	10.4755	33.4215	31.317	33.8776	36.2174	33.7084	8.15323	-2.04649	8.12889e-06	Ephb2	Eph receptor B2 [Source:MGI Symbol;Acc:MGI:99611]
ENSMUSG00000028776	3090.93	4185.38	4061.64	3644.43	2001.58	2290.32	2115.06	2736.68	2285.91	3745.59	0.712782	8.22072e-06	Tinagl1	tubulointerstitial nephritis antigen-like 1 [Source:MGI Symbol;Acc:MGI:2137617]
ENSMUSG00000063931	985.555	822.495	793.178	1197.35	1510.47	1780.89	1462.23	1933.1	1671.67	949.645	-0.815761	8.43704e-06	Pepd	peptidase D [Source:MGI Symbol;Acc:MGI:97542]
ENSMUSG00000053799	748.166	707.533	755.888	714.429	430.767	485.413	552.113	387.074	463.842	731.504	0.655789	8.4553e-06	Exoc6	exocyst complex component 6 [Source:MGI Symbol;Acc:MGI:1351611]
ENSMUSG00000043719	21.404	25.2357	26.2041	19.9034	43.6337	91.8632	59.5146	90.5435	71.3888	23.1868	-1.61572	8.46596e-06	Col6a6	collagen, type VI, alpha 6 [Source:MGI Symbol;Acc:MGI:2444259]
ENSMUSG00000024425	2154.02	2159.98	2036.87	2325.56	1605.16	1703.64	1613.3	1505.29	1606.85	2169.11	0.432602	8.487e-06	Ndfip1	Nedd4 family interacting protein 1 [Source:MGI Symbol;Acc:MGI:1929601]
ENSMUSG00000048355	200.419	276.658	165.287	394.926	562.596	592.935	603.387	596.456	588.843	259.323	-1.18371	8.487e-06	Arxes1	adipocyte-related X-chromosome expressed sequence 1 [Source:MGI Symbol;Acc:MGI:1923469]
ENSMUSG00000018659	1144.14	1288.89	1141.89	1148.11	685.142	835.12	889.973	735.666	786.475	1180.76	0.586138	8.5007e-06	Pnpo	pyridoxine 5'-phosphate oxidase [Source:MGI Symbol;Acc:MGI:2144151]
ENSMUSG00000071001	302.574	390.685	366.858	402.259	203.314	217.131	232.565	243.336	224.087	365.594	0.706988	8.54855e-06	Hrct1	histidine rich carboxyl terminus 1 [Source:MGI Symbol;Acc:MGI:1917945]
ENSMUSG00000033735	1755.13	1833.79	1768.78	1802.83	1202.25	1276.69	1217.76	1458.88	1288.9	1790.13	0.474803	8.59222e-06	Spr	sepiapterin reductase [Source:MGI Symbol;Acc:MGI:103078]
ENSMUSG00000020027	991.393	526.21	520.051	1070.6	264.587	396.682	209.675	136.947	251.973	777.062	1.62429	8.68615e-06	Socs2	suppressor of cytokine signaling 2 [Source:MGI Symbol;Acc:MGI:1201787]
ENSMUSG00000032415	33.0789	51.406	49.3847	38.7593	10.2121	10.439	18.3122	9.05435	12.0044	43.1572	1.83348	8.87548e-06	Ube2cbp	ubiquitin-conjugating enzyme E2C binding protein [Source:MGI Symbol;Acc:MGI:1917598]
ENSMUSG00000029385	2336.92	2387.11	1607.52	2192.52	1330.36	963.52	1357.85	1183.86	1208.9	2131.02	0.817584	9.09298e-06	Ccng2	cyclin G2 [Source:MGI Symbol;Acc:MGI:1095734]
ENSMUSG00000027716	31.133	39.2555	35.2748	45.0446	95.6227	81.4242	71.4176	131.288	94.9382	37.677	-1.33055	9.10023e-06	Trpc3	transient receptor potential cation channel, subfamily C, member 3 [Source:MGI Symbol;Acc:MGI:109526]
ENSMUSG00000036461	751.085	905.679	855.665	830.707	641.508	504.204	530.138	508.176	546.006	835.784	0.613286	9.22021e-06	Elf1	E74-like factor 1 [Source:MGI Symbol;Acc:MGI:107180]
ENSMUSG00000038412	1913.71	1868.37	2014.69	2293.09	2849.19	3026.27	2690.06	2831.75	2849.32	2022.47	-0.494652	9.22436e-06	Higd1a	HIG1 domain family, member 1A [Source:MGI Symbol;Acc:MGI:1930666]
ENSMUSG00000021187	186.798	133.655	109.856	144.562	48.2756	57.4145	63.1771	18.1087	46.744	143.718	1.61324	9.58537e-06	Tc2n	tandem C2 domains, nuclear [Source:MGI Symbol;Acc:MGI:1921663]
ENSMUSG00000054978	16.5394	15.8891	24.1884	8.3804	49.2039	61.5901	44.8649	52.0625	51.9304	16.2493	-1.67122	9.64983e-06	Kbtbd13	kelch repeat and BTB (POZ) domain containing 13 [Source:MGI Symbol;Acc:MGI:1921742]
ENSMUSG00000078453	301.601	314.978	361.818	410.64	225.595	198.341	216.084	181.087	205.277	347.259	0.755337	9.69359e-06	Abracl	ABRA C-terminal like [Source:MGI Symbol;Acc:MGI:1920362]
ENSMUSG00000000184	414.459	429.941	413.219	366.642	765.91	628.428	589.653	574.952	639.736	406.065	-0.656056	9.76048e-06	Ccnd2	cyclin D2 [Source:MGI Symbol;Acc:MGI:88314]
ENSMUSG00000022534	0.972908	0	0	0	49.2039	7.3073	12.8185	16.9769	21.5767	0.243227	-6.17139	9.95837e-06	Mefv	Mediterranean fever [Source:MGI Symbol;Acc:MGI:1859396]
ENSMUSG00000051984	1113.98	953.347	1110.65	1166.97	661.004	752.652	572.256	776.411	690.581	1086.24	0.654414	1.00139e-05	Sec31b	Sec31 homolog B (S. cerevisiae) [Source:MGI Symbol;Acc:MGI:2685187]
ENSMUSG00000028066	663.523	630.891	659.134	919.749	396.417	410.253	416.602	476.485	424.939	718.324	0.757634	1.01856e-05	Pmf1	polyamine-modulated factor 1 [Source:MGI Symbol;Acc:MGI:1914287]
ENSMUSG00000026249	727.735	637.434	636.961	605.484	442.835	448.877	362.582	456.113	427.602	651.903	0.609818	1.02681e-05	Serpine2	serine (or cysteine) peptidase inhibitor, clade E, member 2 [Source:MGI Symbol;Acc:MGI:101780]
ENSMUSG00000038119	172.205	157.022	155.209	199.034	292.438	259.931	307.645	261.444	280.365	170.867	-0.717261	1.03034e-05	Cdon	cell adhesion molecule-related/down-regulated by oncogenes [Source:MGI Symbol;Acc:MGI:1926387]
ENSMUSG00000015090	52.537	39.2555	67.526	42.9495	129.973	160.761	87.8985	117.707	124.085	50.567	-1.29463	1.03858e-05	Ptgds	prostaglandin D2 synthase (brain) [Source:MGI Symbol;Acc:MGI:99261]
ENSMUSG00000028713	3192.11	2764.71	2782.68	4458.37	1069.49	1472.94	2084.84	1602.62	1557.47	3299.47	1.08293	1.04775e-05	Cyp4b1	cytochrome P450, family 4, subfamily b, polypeptide 1 [Source:MGI Symbol;Acc:MGI:103225]
ENSMUSG00000058709	2805.87	2876.86	3027.58	2212.43	1428.77	1856.05	1803.75	1750.89	1709.87	2730.68	0.675641	1.0547e-05	Egln2	egl-9 family hypoxia-inducible factor 2 [Source:MGI Symbol;Acc:MGI:1932287]
ENSMUSG00000004730	83.6701	73.8376	97.7615	96.3746	420.554	266.194	120.861	237.677	261.322	87.9109	-1.57257	1.05588e-05	Adgre1	adhesion G protein-coupled receptor E1 [Source:MGI Symbol;Acc:MGI:106912]
ENSMUSG00000025878	842.538	767.351	778.061	773.092	543.1	549.091	553.944	413.105	514.81	790.26	0.616774	1.05699e-05	Uimc1	ubiquitin interaction motif containing 1 [Source:MGI Symbol;Acc:MGI:103185]
ENSMUSG00000024594	1069.23	1161.77	1193.29	920.796	749.2	767.266	712.344	651.914	720.181	1086.27	0.592802	1.05805e-05	Prrc1	proline-rich coiled-coil 1 [Source:MGI Symbol;Acc:MGI:1916106]
ENSMUSG00000040466	1804.74	1705.74	1377.73	1799.69	1035.14	1223.45	984.281	1083.13	1081.5	1671.98	0.6289	1.07041e-05	Blvrb	biliverdin reductase B (flavin reductase (NADPH)) [Source:MGI Symbol;Acc:MGI:2385271]
ENSMUSG00000039202	575.961	657.062	645.024	529.013	401.058	412.34	359.835	419.896	398.282	601.765	0.596902	1.07051e-05	Abhd2	abhydrolase domain containing 2 [Source:MGI Symbol;Acc:MGI:1914344]
ENSMUSG00000053094	1285.21	1518.81	1509.76	1484.38	890.313	966.651	1062.11	1072.94	998.003	1449.54	0.538789	1.07381e-05	Tmem248	transmembrane protein 248 [Source:MGI Symbol;Acc:MGI:1918917]
ENSMUSG00000053716	214.04	283.2	311.426	260.84	467.902	768.31	395.543	736.798	592.138	267.376	-1.14602	1.08001e-05	Dusp7	dual specificity phosphatase 7 [Source:MGI Symbol;Acc:MGI:2387100]
ENSMUSG00000022300	948.585	937.458	857.681	930.224	663.789	626.34	709.598	674.549	668.569	918.487	0.457878	1.08292e-05	Dcaf13	DDB1 and CUL4 associated factor 13 [Source:MGI Symbol;Acc:MGI:2684929]
ENSMUSG00000031506	5.83745	4.67327	7.05495	3.14265	53.8458	39.6682	14.6498	27.1631	33.8317	5.17708	-2.70649	1.09532e-05	Ptpn7	protein tyrosine phosphatase, non-receptor type 7 [Source:MGI Symbol;Acc:MGI:2156893]
ENSMUSG00000094870	526.343	478.543	462.603	549.964	697.21	797.54	893.635	711.899	775.071	504.363	-0.62062	1.11284e-05	Zfp131	zinc finger protein 131 [Source:MGI Symbol;Acc:MGI:1919715]
ENSMUSG00000038025	1595.57	1776.78	1817.15	1727.41	1244.95	1250.59	1189.38	1371.73	1264.16	1729.23	0.452521	1.12487e-05	Phf2	PHD finger protein 2 [Source:MGI Symbol;Acc:MGI:1338034]
ENSMUSG00000035575	519.533	459.85	531.137	539.488	723.205	709.852	760.872	696.054	722.496	512.502	-0.496631	1.12904e-05	Utp6	UTP6 small subunit processome component [Source:MGI Symbol;Acc:MGI:2445193]
ENSMUSG00000041891	3001.42	2847.89	2466.21	2901.71	2011.79	2119.12	1725.92	1867.46	1931.07	2804.31	0.538366	1.13231e-05	Lman1	lectin, mannose-binding, 1 [Source:MGI Symbol;Acc:MGI:1917611]
ENSMUSG00000026456	1104.25	1670.23	1095.53	1792.36	785.406	776.662	712.344	777.543	762.989	1415.59	0.891732	1.15583e-05	Cyb5r1	cytochrome b5 reductase 1 [Source:MGI Symbol;Acc:MGI:1919267]
ENSMUSG00000040181	21759.1	20158.6	21262.6	26301.9	11031.9	15454.9	14853.9	10392.1	12933.2	22370.5	0.790486	1.15745e-05	Fmo1	flavin containing monooxygenase 1 [Source:MGI Symbol;Acc:MGI:1310002]
ENSMUSG00000091264	1114.95	924.373	776.045	732.237	547.742	494.809	561.269	490.067	523.472	886.902	0.760404	1.16846e-05	Smim13	small integral membrane protein 13 [Source:MGI Symbol;Acc:MGI:2652854]
ENSMUSG00000034908	3891.63	4367.64	4430.51	4360.95	2295.87	2666.12	2922.63	3249.38	2783.5	4262.68	0.615098	1.17505e-05	Sidt2	SID1 transmembrane family, member 2 [Source:MGI Symbol;Acc:MGI:2446134]
ENSMUSG00000026356	1891.33	1841.27	1704.28	1932.73	1379.57	1421.79	1384.4	1252.9	1359.66	1842.4	0.437929	1.17841e-05	Dars	aspartyl-tRNA synthetase [Source:MGI Symbol;Acc:MGI:2442544]
ENSMUSG00000054717	401.811	352.364	460.588	388.641	276.656	234.877	178.544	176.56	216.659	400.851	0.886076	1.18171e-05	Hmgb2	high mobility group box 2 [Source:MGI Symbol;Acc:MGI:96157]
ENSMUSG00000037089	1922.47	1571.15	1449.29	1549.33	867.103	1112.8	804.821	1101.24	971.489	1623.06	0.741299	1.19591e-05	Slc35b2	solute carrier family 35, member B2 [Source:MGI Symbol;Acc:MGI:1921086]
ENSMUSG00000024007	245.173	230.859	234.829	338.359	420.554	448.877	521.898	706.24	524.392	262.305	-0.999204	1.20319e-05	Ppil1	peptidylprolyl isomerase (cyclophilin)-like 1 [Source:MGI Symbol;Acc:MGI:1916066]
ENSMUSG00000033373	383.326	506.582	416.242	480.825	231.166	247.404	292.995	299.926	267.873	446.744	0.738831	1.21657e-05	Fntb	farnesyltransferase, CAAX box, beta [Source:MGI Symbol;Acc:MGI:1861305]
ENSMUSG00000087516	111.884	86.9228	93.7301	124.658	3.7135	28.1853	28.3839	36.2174	24.125	104.299	2.12104	1.21737e-05	Tbx3os1	T-box 3, opposite strand 1 [Source:MGI Symbol;Acc:MGI:3780472]
ENSMUSG00000005882	1979.87	2364.67	2413.8	2236.52	2969.88	3218.34	3708.22	3231.27	3281.93	2248.72	-0.545512	1.21737e-05	Uqcc1	ubiquinol-cytochrome c reductase complex assembly factor 1 [Source:MGI Symbol;Acc:MGI:1929472]
ENSMUSG00000055239	4443.27	4212.48	4133.19	4469.89	3162.98	3279.93	3327.33	3523.28	3323.38	4314.71	0.376789	1.23683e-05	Kcmf1	potassium channel modulatory factor 1 [Source:MGI Symbol;Acc:MGI:1921537]
ENSMUSG00000032192	242.254	286.004	305.379	272.363	390.846	457.228	406.531	448.191	425.699	276.5	-0.621492	1.23808e-05	Gnb5	guanine nucleotide binding protein (G protein), beta 5 [Source:MGI Symbol;Acc:MGI:101848]
ENSMUSG00000031936	0.972908	3.73861	1.00785	5.23775	22.281	15.6585	21.059	46.4036	26.3505	2.73928	-3.26686	1.25678e-05	Hephl1	hephaestin-like 1 [Source:MGI Symbol;Acc:MGI:2685355]
ENSMUSG00000028944	2886.62	2981.55	3177.75	2560.21	1492.83	2210.98	1810.16	1668.26	1795.56	2901.53	0.692555	1.2753e-05	Prkag2	protein kinase, AMP-activated, gamma 2 non-catalytic subunit [Source:MGI Symbol;Acc:MGI:1336153]
ENSMUSG00000022146	563.313	679.493	588.585	743.76	434.48	353.882	394.628	277.29	365.07	643.788	0.816306	1.27717e-05	Osmr	oncostatin M receptor [Source:MGI Symbol;Acc:MGI:1330819]
ENSMUSG00000004044	5154.46	7370.68	7662.69	7690.06	11521.1	12125.9	10142.2	13907.5	11924.2	6969.47	-0.774742	1.29675e-05	Cavin1	caveolae associated 1 [Source:MGI Symbol;Acc:MGI:1277968]
ENSMUSG00000005973	170.259	172.911	195.523	155.037	338.857	305.863	238.059	306.716	297.374	173.433	-0.776968	1.30998e-05	Rcn1	reticulocalbin 1 [Source:MGI Symbol;Acc:MGI:104559]
ENSMUSG00000045087	37.9434	49.5366	64.5024	87.9942	145.755	140.926	121.776	186.746	148.801	59.9942	-1.31229	1.32133e-05	S1pr5	sphingosine-1-phosphate receptor 5 [Source:MGI Symbol;Acc:MGI:2150641]
ENSMUSG00000033849	571.097	227.121	187.46	338.359	995.219	767.266	894.551	899.777	889.203	331.009	-1.42569	1.32187e-05	B3galt2	UDP-Gal:betaGlcNAc beta 1,3-galactosyltransferase, polypeptide 2 [Source:MGI Symbol;Acc:MGI:1349461]
ENSMUSG00000026333	86.5888	104.681	103.809	122.563	189.389	182.682	223.409	164.11	189.898	104.41	-0.866678	1.33173e-05	Gin1	gypsy retrotransposon integrase 1 [Source:MGI Symbol;Acc:MGI:2182036]
ENSMUSG00000025876	62.2661	49.5366	73.5731	41.902	117.904	158.673	99.8015	148.265	131.161	56.8195	-1.20361	1.33225e-05	Unc5a	unc-5 netrin receptor A [Source:MGI Symbol;Acc:MGI:894682]
ENSMUSG00000001445	1349.42	1494.51	1435.18	1514.76	1814.98	1987.59	2173.66	2242.08	2054.58	1448.47	-0.504111	1.33866e-05	Mrpl10	mitochondrial ribosomal protein L10 [Source:MGI Symbol;Acc:MGI:1333801]
ENSMUSG00000005682	1097.44	1343.1	1381.76	1331.44	881.029	791.276	885.395	941.653	874.838	1288.43	0.558592	1.34019e-05	Pan2	PAN2 poly(A) specific ribonuclease subunit [Source:MGI Symbol;Acc:MGI:1918984]
ENSMUSG00000029772	2747.49	3063.79	2408.76	2518.31	1405.56	1825.78	1930.11	1659.21	1705.16	2684.59	0.654912	1.34339e-05	Ahcyl2	S-adenosylhomocysteine hydrolase-like 2 [Source:MGI Symbol;Acc:MGI:1921590]
ENSMUSG00000038174	1098.41	838.384	752.864	811.851	2079.56	2740.24	3041.66	1045.78	2226.81	875.378	-1.34715	1.35479e-05	Fam126b	family with sequence similarity 126, member B [Source:MGI Symbol;Acc:MGI:1098784]
ENSMUSG00000025784	220.85	225.252	213.664	98.4697	421.483	575.189	368.075	428.95	448.424	189.559	-1.24068	1.35553e-05	Clec3b	C-type lectin domain family 3, member b [Source:MGI Symbol;Acc:MGI:104540]
ENSMUSG00000015127	262.685	253.291	279.175	235.699	169.893	157.629	158.401	174.296	165.055	257.712	0.643879	1.3775e-05	Unkl	unkempt family like zinc finger [Source:MGI Symbol;Acc:MGI:1921404]
ENSMUSG00000016319	15831.2	16906	15145	18261.9	12052.2	12227.2	11977.1	12807.4	12266	16536	0.430975	1.41737e-05	Slc25a5	solute carrier family 25 (mitochondrial carrier, adenine nucleotide translocator), member 5 [Source:MGI Symbol;Acc:MGI:1353496]
ENSMUSG00000034926	95.3449	108.42	58.4553	186.464	339.786	294.38	232.565	510.439	344.292	112.171	-1.61807	1.41883e-05	Dhcr24	24-dehydrocholesterol reductase [Source:MGI Symbol;Acc:MGI:1922004]
ENSMUSG00000024087	516.614	490.693	458.572	323.693	286.868	180.595	195.941	131.288	198.673	447.393	1.16893	1.42519e-05	Cyp1b1	cytochrome P450, family 1, subfamily b, polypeptide 1 [Source:MGI Symbol;Acc:MGI:88590]
ENSMUSG00000032898	15115.1	12963.6	17608.2	9828.11	4933.39	8410.7	6857	7459.66	6915.19	13878.8	1.0051	1.42585e-05	Fbxo21	F-box protein 21 [Source:MGI Symbol;Acc:MGI:1924223]
ENSMUSG00000037573	2370.98	3356.34	2968.12	2052.15	4912.97	9332.47	4098.27	6554.22	6224.48	2686.9	-1.21189	1.44513e-05	Tob1	transducer of ErbB-2.1 [Source:MGI Symbol;Acc:MGI:1349721]
ENSMUSG00000051768	1053.66	1178.6	1124.76	1060.12	645.221	800.671	564.016	780.938	697.712	1104.28	0.663779	1.44665e-05	Xrcc1	X-ray repair complementing defective repair in Chinese hamster cells 1 [Source:MGI Symbol;Acc:MGI:99137]
ENSMUSG00000018068	244.2	199.081	184.437	206.367	461.403	362.233	450.48	285.212	389.832	208.521	-0.904403	1.45736e-05	Ints2	integrator complex subunit 2 [Source:MGI Symbol;Acc:MGI:1917672]
ENSMUSG00000040548	3337.07	3642.35	3164.65	3429.68	1827.04	1753.75	2583.85	2245.48	2102.53	3393.44	0.690569	1.45826e-05	Tex2	testis expressed gene 2 [Source:MGI Symbol;Acc:MGI:102465]
ENSMUSG00000038967	11673.9	15210.6	15360.6	13395	6691.73	8312.58	9319.08	9570.45	8473.46	13910	0.715154	1.46459e-05	Pdk2	pyruvate dehydrogenase kinase, isoenzyme 2 [Source:MGI Symbol;Acc:MGI:1343087]
ENSMUSG00000039218	15772.8	15934	17285.6	16154.3	11169.3	12715.7	12924.7	12392	12300.5	16286.7	0.404993	1.47154e-05	Srrm2	serine/arginine repetitive matrix 2 [Source:MGI Symbol;Acc:MGI:1923206]
ENSMUSG00000087590	253.929	249.553	314.449	202.177	79.8403	90.8193	166.641	73.5666	102.717	255.027	1.30823	1.4866e-05	Epb41l4aos	erythrocyte membrane protein band 4.1 like 4a, opposite strand [Source:MGI Symbol;Acc:MGI:1916999]
ENSMUSG00000026032	5414.23	5046.2	5459.53	5432.59	6821.71	7461.8	7852.27	6651.56	7196.83	5338.14	-0.431148	1.4866e-05	Ndufb3	NADH:ubiquinone oxidoreductase subunit B3 [Source:MGI Symbol;Acc:MGI:1913745]
ENSMUSG00000018387	118.695	171.976	153.193	141.419	48.2756	65.7657	32.0463	83.7528	57.4601	146.321	1.35801	1.49783e-05	Shroom1	shroom family member 1 [Source:MGI Symbol;Acc:MGI:1919024]
ENSMUSG00000025007	263.658	349.56	177.382	456.732	141.113	75.1608	36.6244	101.861	88.69	311.833	1.8144	1.49834e-05	Aldh18a1	aldehyde dehydrogenase 18 family, member A1 [Source:MGI Symbol;Acc:MGI:1888908]
ENSMUSG00000071713	428.079	520.602	621.844	756.331	363.923	230.702	253.624	298.794	286.761	581.714	1.01964	1.49957e-05	Csf2rb	colony stimulating factor 2 receptor, beta, low-affinity (granulocyte-macrophage) [Source:MGI Symbol;Acc:MGI:1339759]
ENSMUSG00000078919	404.73	343.018	480.745	303.789	157.824	256.799	163.894	181.087	189.901	383.07	1.01392	1.49957e-05	Dpm1	dolichol-phosphate (beta-D) mannosyltransferase 1 [Source:MGI Symbol;Acc:MGI:1330239]
ENSMUSG00000041540	157.611	117.766	118.926	104.755	236.736	333.004	277.43	186.746	258.479	124.765	-1.05091	1.50735e-05	Sox5	SRY (sex determining region Y)-box 5 [Source:MGI Symbol;Acc:MGI:98367]
ENSMUSG00000030199	454.348	712.206	934.277	730.142	408.485	339.267	327.788	337.275	353.204	707.743	1.00223	1.51028e-05	Etv6	ets variant 6 [Source:MGI Symbol;Acc:MGI:109336]
ENSMUSG00000056770	3318.59	3003.04	3218.07	3074.56	2422.13	2459.43	2514.26	2290.75	2421.64	3153.56	0.380736	1.5286e-05	Setd3	SET domain containing 3 [Source:MGI Symbol;Acc:MGI:1289184]
ENSMUSG00000028088	827.944	876.705	966.529	745.855	484.612	625.296	570.425	490.067	542.6	854.258	0.654833	1.54669e-05	Fmo5	flavin containing monooxygenase 5 [Source:MGI Symbol;Acc:MGI:1310004]
ENSMUSG00000001802	620.715	565.466	651.071	649.481	806.759	965.607	939.416	1126.14	959.479	621.683	-0.625493	1.54669e-05	Lrp3	low density lipoprotein receptor-related protein 3 [Source:MGI Symbol;Acc:MGI:3584516]
ENSMUSG00000061130	5120.41	4731.22	5268.03	4132.58	3040.43	3505.42	3525.1	3124.88	3298.96	4813.06	0.544946	1.58653e-05	Ppm1b	protein phosphatase 1B, magnesium dependent, beta isoform [Source:MGI Symbol;Acc:MGI:101841]
ENSMUSG00000031490	4150.42	3692.82	3945.73	3924.12	4873.05	5435.59	5016.63	5359.05	5171.08	3928.27	-0.396451	1.59575e-05	Eif4ebp1	eukaryotic translation initiation factor 4E binding protein 1 [Source:MGI Symbol;Acc:MGI:103267]
ENSMUSG00000029730	645.038	647.715	583.545	635.863	426.125	440.526	485.273	419.896	442.955	628.04	0.502897	1.59663e-05	Mcm7	minichromosome maintenance complex component 7 [Source:MGI Symbol;Acc:MGI:1298398]
ENSMUSG00000031101	8.75617	9.34654	6.0471	4.1902	103.05	42.7999	16.481	36.2174	49.637	7.085	-2.80389	1.60516e-05	Sash3	SAM and SH3 domain containing 3 [Source:MGI Symbol;Acc:MGI:1921381]
ENSMUSG00000000439	777.353	824.365	858.689	814.994	592.304	589.803	614.374	630.409	606.723	818.85	0.432838	1.60946e-05	Mkrn2	makorin, ring finger protein, 2 [Source:MGI Symbol;Acc:MGI:1914277]
ENSMUSG00000038446	1184.03	1009.43	964.513	939.652	731.56	699.413	712.344	614.564	689.471	1024.4	0.57062	1.64628e-05	Cdc40	cell division cycle 40 [Source:MGI Symbol;Acc:MGI:1918963]
ENSMUSG00000020459	1031.28	1001.95	1044.13	1192.11	1467.76	1498	1531.82	1385.32	1470.72	1067.37	-0.463158	1.66149e-05	Mtif2	mitochondrial translational initiation factor 2 [Source:MGI Symbol;Acc:MGI:1924034]
ENSMUSG00000078572	383.326	430.875	444.462	404.354	570.023	577.277	688.539	612.301	612.035	415.754	-0.558208	1.67604e-05	Ndufaf8	NADH:ubiquinone oxidoreductase complex assembly factor 8 [Source:MGI Symbol;Acc:MGI:1913676]
ENSMUSG00000020109	1206.41	1252.44	1339.43	1297.91	793.762	878.964	907.369	1006.17	896.565	1274.05	0.507685	1.68018e-05	Dnajb12	DnaJ heat shock protein family (Hsp40) member B12 [Source:MGI Symbol;Acc:MGI:1931881]
ENSMUSG00000020288	370.678	374.796	320.496	317.408	562.596	470.799	572.256	501.385	526.759	345.844	-0.607314	1.71766e-05	Ahsa2	AHA1, activator of heat shock protein ATPase 2 [Source:MGI Symbol;Acc:MGI:1916133]
ENSMUSG00000050953	4525.97	4844.31	3745.17	4486.66	6690.81	6837.54	6486.18	9731.17	7436.42	4400.53	-0.75679	1.72947e-05	Gja1	gap junction protein, alpha 1 [Source:MGI Symbol;Acc:MGI:95713]
ENSMUSG00000042541	1401.96	1297.3	1453.32	1318.87	1737.92	1845.62	1872.42	1772.39	1807.09	1367.86	-0.401863	1.75709e-05	Sem1	SEM1, 26S proteasome complex subunit [Source:MGI Symbol;Acc:MGI:109238]
ENSMUSG00000038302	1271.59	1587.98	1742.57	1659.32	2211.39	2268.39	2478.56	2417.51	2343.96	1565.36	-0.582561	1.75709e-05	Afg1l	AFG1 like ATPase [Source:MGI Symbol;Acc:MGI:2148801]
ENSMUSG00000063193	4.86454	14.0198	11.0864	11.523	142.042	33.4048	31.1307	53.1943	64.9429	10.3734	-2.6479	1.75732e-05	Cd300lb	CD300 molecule like family member B [Source:MGI Symbol;Acc:MGI:2685099]
ENSMUSG00000006476	683.954	888.856	791.163	817.089	535.673	518.818	461.467	574.952	522.728	795.265	0.606409	1.76359e-05	Nsmf	NMDA receptor synaptonuclear signaling and neuronal migration factor [Source:MGI Symbol;Acc:MGI:1861755]
ENSMUSG00000044505	91.4533	71.9683	100.785	123.611	28.7797	53.2389	16.481	24.8995	30.8498	96.9544	1.65588	1.78028e-05	Lingo4	leucine rich repeat and Ig domain containing 4 [Source:MGI Symbol;Acc:MGI:2444651]
ENSMUSG00000050043	1400.99	1401.05	1296.1	1275.92	1655.29	1951.05	2022.58	1875.38	1876.08	1343.51	-0.48145	1.78028e-05	Tmx2	thioredoxin-related transmembrane protein 2 [Source:MGI Symbol;Acc:MGI:1914208]
ENSMUSG00000031700	1275.48	1279.54	1437.19	883.084	640.58	548.047	733.403	348.593	567.656	1218.83	1.1014	1.83074e-05	Gpt2	glutamic pyruvate transaminase (alanine aminotransferase) 2 [Source:MGI Symbol;Acc:MGI:1915391]
ENSMUSG00000074182	255.875	242.075	224.751	222.081	154.11	147.19	159.316	134.684	148.825	236.195	0.664334	1.83242e-05	Znhit6	zinc finger, HIT type 6 [Source:MGI Symbol;Acc:MGI:1916996]
ENSMUSG00000025027	1473.95	1473.95	1600.47	1456.09	1035.14	1176.48	1113.38	1152.17	1119.29	1501.12	0.423945	1.83694e-05	Xpnpep1	X-prolyl aminopeptidase (aminopeptidase P) 1, soluble [Source:MGI Symbol;Acc:MGI:2180003]
ENSMUSG00000029763	466.996	382.273	424.305	403.307	731.56	595.023	595.146	616.828	634.639	419.22	-0.598774	1.84597e-05	Exoc4	exocyst complex component 4 [Source:MGI Symbol;Acc:MGI:1096376]
ENSMUSG00000020262	933.991	1123.45	1152.98	878.894	457.689	625.296	713.26	572.688	592.233	1022.33	0.787694	1.84717e-05	Adarb1	adenosine deaminase, RNA-specific, B1 [Source:MGI Symbol;Acc:MGI:891999]
ENSMUSG00000025162	3301.08	3585.33	3531.51	3466.34	2282.88	2485.53	2186.48	2813.64	2442.13	3471.06	0.507728	1.84926e-05	Csnk1d	casein kinase 1, delta [Source:MGI Symbol;Acc:MGI:1355272]
ENSMUSG00000000296	337.599	267.311	236.845	236.746	115.119	164.936	103.464	159.583	135.775	269.625	0.994221	1.8617e-05	Tpd52l1	tumor protein D52-like 1 [Source:MGI Symbol;Acc:MGI:1298386]
ENSMUSG00000048878	1114.95	1121.58	936.293	1134.5	1551.32	1764.19	1927.36	2883.81	2031.67	1076.83	-0.915481	1.8679e-05	Hexim1	hexamethylene bis-acetamide inducible 1 [Source:MGI Symbol;Acc:MGI:2385923]
ENSMUSG00000058656	22.3769	22.4317	15.1178	16.7608	62.2012	61.5901	66.8395	35.0856	56.4291	19.1718	-1.55895	1.8679e-05	Samd12	sterile alpha motif domain containing 12 [Source:MGI Symbol;Acc:MGI:2444518]
ENSMUSG00000020802	1005.01	1213.18	1169.11	1047.55	708.351	715.071	697.695	862.427	745.886	1108.71	0.572991	1.87031e-05	Ube2o	ubiquitin-conjugating enzyme E2O [Source:MGI Symbol;Acc:MGI:2444266]
ENSMUSG00000028759	4090.1	4358.29	4353.91	4202.77	3312.45	3241.31	3308.1	3527.8	3347.41	4251.27	0.345028	1.8971e-05	Hp1bp3	heterochromatin protein 1, binding protein 3 [Source:MGI Symbol;Acc:MGI:109369]
ENSMUSG00000029417	140.099	191.604	210.641	123.611	391.775	371.628	251.793	349.724	341.23	166.489	-1.03409	1.90445e-05	Cxcl9	chemokine (C-X-C motif) ligand 9 [Source:MGI Symbol;Acc:MGI:1352449]
ENSMUSG00000039221	652.821	473.869	426.321	519.585	322.147	307.95	306.729	238.809	293.909	518.149	0.816622	1.90971e-05	Rpl22l1	ribosomal protein L22 like 1 [Source:MGI Symbol;Acc:MGI:1915278]
ENSMUSG00000068854	275.333	278.527	246.923	328.931	491.111	416.516	477.948	402.919	447.124	282.428	-0.664699	1.93036e-05	Hist2h2be	histone cluster 2, H2be [Source:MGI Symbol;Acc:MGI:2448415]
ENSMUSG00000040204	7.78326	7.47723	4.0314	8.3804	49.2039	41.756	21.059	23.7677	33.9467	6.91807	-2.2963	1.96031e-05	Pclaf	PCNA clamp associated factor [Source:MGI Symbol;Acc:MGI:1915276]
ENSMUSG00000016252	8983.83	8400.67	9415.34	8467.34	10766.4	11657.2	12173.9	11791	11597.1	8816.79	-0.395435	1.96188e-05	Atp5e	ATP synthase, H+ transporting, mitochondrial F1 complex, epsilon subunit [Source:MGI Symbol;Acc:MGI:1855697]
ENSMUSG00000029311	1331.91	1358.99	1449.29	1286.39	891.241	1014.67	1044.71	1003.9	988.631	1356.64	0.456816	1.96297e-05	Hsd17b11	hydroxysteroid (17-beta) dehydrogenase 11 [Source:MGI Symbol;Acc:MGI:2149821]
ENSMUSG00000024937	864.915	847.731	1402.93	1015.08	2221.6	1563.76	1877.92	2843.07	2126.59	1032.66	-1.04216	1.96297e-05	Ehbp1l1	EH domain binding protein 1-like 1 [Source:MGI Symbol;Acc:MGI:3612340]
ENSMUSG00000019539	93.3991	97.204	91.7144	89.0417	198.672	222.351	122.692	226.359	192.518	92.8398	-1.04916	1.96542e-05	Rcn3	reticulocalbin 3, EF-hand calcium binding domain [Source:MGI Symbol;Acc:MGI:1277122]
ENSMUSG00000023977	4189.34	3856.38	4166.45	3369.97	2669.08	2823.75	2787.12	2264.72	2636.17	3895.54	0.56321	1.97007e-05	Ubr2	ubiquitin protein ligase E3 component n-recognin 2 [Source:MGI Symbol;Acc:MGI:1861099]
ENSMUSG00000038007	4980.31	4116.22	3783.47	3600.43	2412.85	2551.29	2859.45	1864.07	2421.91	4120.11	0.766313	1.97433e-05	Acer2	alkaline ceramidase 2 [Source:MGI Symbol;Acc:MGI:1920932]
ENSMUSG00000057113	3094.82	3277.83	3173.72	2925.81	2340.44	2255.87	2164.5	1749.75	2127.64	3118.04	0.551045	1.98132e-05	Npm1	nucleophosmin 1 [Source:MGI Symbol;Acc:MGI:106184]
ENSMUSG00000026623	1198.62	880.444	1135.85	999.362	2063.78	1733.92	2063.78	1381.92	1810.85	1053.57	-0.781894	1.99586e-05	Lpgat1	lysophosphatidylglycerol acyltransferase 1 [Source:MGI Symbol;Acc:MGI:2446186]
ENSMUSG00000040521	785.136	765.481	754.88	865.276	1075.06	1118.02	1036.47	1240.45	1117.5	792.693	-0.494962	2.00577e-05	Tsfm	Ts translation elongation factor, mitochondrial [Source:MGI Symbol;Acc:MGI:1913649]
ENSMUSG00000040128	2931.37	2494.59	2504.51	2003.96	1158.61	1844.57	1222.34	1235.92	1365.36	2483.61	0.863419	2.01189e-05	Pnrc1	proline-rich nuclear receptor coactivator 1 [Source:MGI Symbol;Acc:MGI:1917838]
ENSMUSG00000075486	674.225	731.834	681.307	751.093	896.811	1009.45	978.787	1005.03	972.521	709.615	-0.454298	2.05745e-05	Commd6	COMM domain containing 6 [Source:MGI Symbol;Acc:MGI:1913450]
ENSMUSG00000018209	472.833	480.412	458.572	510.157	740.844	602.33	708.682	718.689	692.636	480.493	-0.52814	2.05828e-05	Stk4	serine/threonine kinase 4 [Source:MGI Symbol;Acc:MGI:1929004]
ENSMUSG00000027654	45.7267	92.5307	58.4553	9.42795	10.2121	4.1756	1.83122	6.79077	5.75243	51.5352	3.16683	2.07654e-05	Fam83d	family with sequence similarity 83, member D [Source:MGI Symbol;Acc:MGI:1919128]
ENSMUSG00000025939	638.227	597.244	575.483	632.72	833.682	821.549	1057.53	906.567	904.832	610.918	-0.567119	2.10485e-05	Ube2w	ubiquitin-conjugating enzyme E2W (putative) [Source:MGI Symbol;Acc:MGI:1914049]
ENSMUSG00000011427	142.045	203.755	171.335	123.611	244.163	341.355	317.717	307.848	302.771	160.186	-0.916276	2.10964e-05	Zfp790	zinc finger protein 790 [Source:MGI Symbol;Acc:MGI:1923431]
ENSMUSG00000078861	145.936	206.558	224.751	157.132	319.361	345.531	385.472	287.476	334.46	183.594	-0.865806	2.13301e-05	Zfp931	zinc finger protein 931 [Source:MGI Symbol;Acc:MGI:2441662]
ENSMUSG00000022838	135.234	151.414	149.162	136.181	57.5593	88.7315	86.0673	72.4348	76.1982	142.998	0.909486	2.15695e-05	Eaf2	ELL associated factor 2 [Source:MGI Symbol;Acc:MGI:2146616]
ENSMUSG00000032127	1606.27	1523.49	1624.65	1649.89	956.227	1030.33	1193.96	1237.05	1104.39	1601.08	0.536125	2.16158e-05	Vps11	VPS11, CORVET/HOPS core subunit [Source:MGI Symbol;Acc:MGI:1918982]
ENSMUSG00000000805	1685.08	2340.37	2150.75	2012.34	1317.37	1251.64	1463.14	1378.53	1352.67	2047.14	0.597755	2.22128e-05	Car4	carbonic anhydrase 4 [Source:MGI Symbol;Acc:MGI:1096574]
ENSMUSG00000020181	47.6725	50.4713	49.3847	46.0922	95.6227	116.917	98.8859	79.2256	97.6628	48.4052	-1.01343	2.22128e-05	Nav3	neuron navigator 3 [Source:MGI Symbol;Acc:MGI:2183703]
ENSMUSG00000037669	712.168	823.43	818.375	919.749	1219.89	1064.78	1287.35	1344.57	1229.15	818.43	-0.586937	2.23589e-05	Ldah	lipid droplet associated hydrolase [Source:MGI Symbol;Acc:MGI:1916082]
ENSMUSG00000045659	75.8868	113.093	118.926	82.7564	38.0634	54.2828	34.7932	23.7677	37.7268	97.6657	1.37036	2.2384e-05	Plekha7	pleckstrin homology domain containing, family A member 7 [Source:MGI Symbol;Acc:MGI:2445094]
ENSMUSG00000026395	103.128	55.1446	79.6202	55.5201	488.326	240.097	140.088	160.715	257.306	73.3533	-1.8112	2.2999e-05	Ptprc	protein tyrosine phosphatase, receptor type, C [Source:MGI Symbol;Acc:MGI:97810]
ENSMUSG00000027030	659.631	562.662	514.004	517.49	271.086	391.462	349.763	351.988	341.075	563.447	0.725566	2.30825e-05	Stk39	serine/threonine kinase 39 [Source:MGI Symbol;Acc:MGI:1858416]
ENSMUSG00000036817	2550.96	2223.54	2436.98	1764.07	1280.23	1507.39	1539.14	1294.77	1405.38	2243.89	0.675027	2.31793e-05	Sun1	Sad1 and UNC84 domain containing 1 [Source:MGI Symbol;Acc:MGI:1924303]
ENSMUSG00000024899	746.22	1017.84	1021.96	829.659	494.824	535.521	637.264	422.159	522.442	903.919	0.790003	2.32068e-05	Papss2	3'-phosphoadenosine 5'-phosphosulfate synthase 2 [Source:MGI Symbol;Acc:MGI:1330223]
ENSMUSG00000041650	5827.72	6134.13	6245.65	5590.77	7362.95	7602.72	8063.78	7654.33	7670.94	5949.57	-0.366594	2.32997e-05	Pcca	propionyl-Coenzyme A carboxylase, alpha polypeptide [Source:MGI Symbol;Acc:MGI:97499]
ENSMUSG00000015759	1108.14	1149.62	1066.31	1143.92	1462.19	1491.73	1669.16	1422.67	1511.44	1117	-0.436707	2.35592e-05	Cnih1	cornichon family AMPA receptor auxiliary protein 1 [Source:MGI Symbol;Acc:MGI:1277202]
ENSMUSG00000034116	30.1601	22.4317	24.1884	21.9985	147.612	67.8535	50.3585	69.0395	83.7158	24.6947	-1.76273	2.36375e-05	Vav1	vav 1 oncogene [Source:MGI Symbol;Acc:MGI:98923]
ENSMUSG00000112148	22.3769	18.6931	36.2826	24.0936	359.282	65.7657	66.8395	84.8846	144.193	25.3616	-2.50981	2.37323e-05	Lilrb4a	leukocyte immunoglobulin-like receptor, subfamily B, member 4A [Source:MGI Symbol;Acc:MGI:102701]
ENSMUSG00000042524	9339.91	8705.36	9696.53	7914.24	6218.26	6200.77	6956.8	5623.89	6249.93	8914.01	0.512131	2.41401e-05	Sun2	Sad1 and UNC84 domain containing 2 [Source:MGI Symbol;Acc:MGI:2443011]
ENSMUSG00000042532	6.81035	0.934654	5.03925	3.14265	39.9202	22.9658	12.8185	57.7215	33.3565	3.98173	-3.06629	2.42724e-05	Golga7b	golgi autoantigen, golgin subfamily a, 7B [Source:MGI Symbol;Acc:MGI:1918396]
ENSMUSG00000032425	326.897	297.22	275.143	235.699	180.105	174.331	180.375	158.451	173.316	283.74	0.710552	2.43949e-05	Zfp949	zinc finger protein 949 [Source:MGI Symbol;Acc:MGI:1918890]
ENSMUSG00000061751	238.362	233.663	268.088	219.985	159.681	143.014	152.907	155.056	152.664	240.025	0.652383	2.48225e-05	Kalrn	kalirin, RhoGEF kinase [Source:MGI Symbol;Acc:MGI:2685385]
ENSMUSG00000067203	185.825	264.507	204.594	195.892	135.543	92.9071	112.62	118.838	114.977	212.704	0.887038	2.51719e-05	H2-K2	histocompatibility 2, K region locus 2 [Source:MGI Symbol;Acc:MGI:95906]
ENSMUSG00000032578	88.5346	68.2297	88.6908	114.183	607.158	1298.61	130.932	1842.56	969.816	89.9095	-3.43122	2.51719e-05	Cish	cytokine inducible SH2-containing protein [Source:MGI Symbol;Acc:MGI:103159]
ENSMUSG00000025511	2655.06	2571.23	1947.17	2466.98	1011.93	1704.69	775.522	1178.2	1167.58	2410.11	1.046	2.5278e-05	Tspan4	tetraspanin 4 [Source:MGI Symbol;Acc:MGI:1928097]
ENSMUSG00000029221	1973.06	2109.51	2074.16	2175.76	2674.65	3025.22	3304.44	2685.75	2922.51	2083.12	-0.488684	2.53097e-05	Slc30a9	solute carrier family 30 (zinc transporter), member 9 [Source:MGI Symbol;Acc:MGI:1923690]
ENSMUSG00000028850	71.0223	87.8575	83.6516	82.7564	158.752	144.058	124.523	150.529	144.466	81.3219	-0.827933	2.57136e-05	Gpatch3	G patch domain containing 3 [Source:MGI Symbol;Acc:MGI:2442492]
ENSMUSG00000030103	878.536	478.543	776.045	469.302	1925.45	1468.77	933.006	2312.26	1659.87	650.606	-1.35098	2.57136e-05	Bhlhe40	basic helix-loop-helix family, member e40 [Source:MGI Symbol;Acc:MGI:1097714]
ENSMUSG00000033793	2567.5	2477.77	2405.74	2975.04	1899.46	1671.28	1963.07	1620.73	1788.63	2606.51	0.5427	2.65283e-05	Atp6v1h	ATPase, H+ transporting, lysosomal V1 subunit H [Source:MGI Symbol;Acc:MGI:1914864]
ENSMUSG00000020846	612.932	571.073	593.624	680.907	1033.28	930.115	919.272	1524.53	1101.8	614.634	-0.841556	2.66576e-05	Rflnb	refilin B [Source:MGI Symbol;Acc:MGI:1923816]
ENSMUSG00000031149	51.5641	65.4258	64.5024	67.0432	116.975	108.566	108.042	129.025	115.652	62.1339	-0.895363	2.71319e-05	Praf2	PRA1 domain family 2 [Source:MGI Symbol;Acc:MGI:1859607]
ENSMUSG00000073888	118.695	175.715	141.099	173.893	288.725	239.053	257.286	269.367	263.608	152.35	-0.791496	2.73449e-05	Ccl27a	chemokine (C-C motif) ligand 27A [Source:MGI Symbol;Acc:MGI:1343459]
ENSMUSG00000087382	1943.87	1189.81	1349.51	1714.84	3323.59	2563.82	2523.42	2578.23	2747.26	1549.51	-0.826372	2.78414e-05	Ctcflos	CCCTC-binding factor (zinc finger protein)-like, opposite strand [Source:MGI Symbol;Acc:MGI:1921411]
ENSMUSG00000054619	10746.7	11200.9	12213.1	9050.83	6019.59	7308.34	7978.62	5963.42	6817.5	10802.9	0.664065	2.79486e-05	Mettl7a1	methyltransferase like 7A1 [Source:MGI Symbol;Acc:MGI:1916523]
ENSMUSG00000027624	1002.09	1393.57	1455.34	1039.17	1697.07	2473	2082.1	2388.09	2160.06	1222.54	-0.820859	2.80638e-05	Epb41l1	erythrocyte membrane protein band 4.1 like 1 [Source:MGI Symbol;Acc:MGI:103010]
ENSMUSG00000073412	6.81035	3.73861	7.05495	8.3804	114.19	36.5365	19.2278	24.8995	48.7135	6.49608	-2.9151	2.88941e-05	Lst1	leukocyte specific transcript 1 [Source:MGI Symbol;Acc:MGI:1096324]
ENSMUSG00000031748	727.735	736.507	753.872	900.893	1162.33	1232.85	1286.43	1967.06	1412.17	779.752	-0.856457	2.93888e-05	Gnao1	guanine nucleotide binding protein, alpha O [Source:MGI Symbol;Acc:MGI:95775]
ENSMUSG00000091144	123.559	112.158	115.903	95.327	51.0607	68.8974	57.6834	38.481	54.0306	111.737	1.0456	2.96619e-05	Phf11c	PHD finger protein 11C [Source:MGI Symbol;Acc:MGI:3648476]
ENSMUSG00000016664	1659.78	1852.48	1868.55	1880.35	1445.48	1234.93	1154.58	1311.75	1286.69	1815.29	0.496501	2.97968e-05	Pacsin2	protein kinase C and casein kinase substrate in neurons 2 [Source:MGI Symbol;Acc:MGI:1345153]
ENSMUSG00000037278	358.03	347.691	291.269	373.975	196.816	246.36	152.907	184.482	195.141	342.741	0.813978	2.9929e-05	Tmem97	transmembrane protein 97 [Source:MGI Symbol;Acc:MGI:1916321]
ENSMUSG00000063659	409.594	404.705	356.779	450.446	640.58	601.286	748.969	548.92	634.939	405.381	-0.648709	3.0016e-05	Zbtb18	zinc finger and BTB domain containing 18 [Source:MGI Symbol;Acc:MGI:1353609]
ENSMUSG00000025147	1399.04	1324.4	1320.28	1256.01	818.828	897.754	1047.46	965.421	932.365	1324.94	0.5071	3.03537e-05	Mob2	MOB kinase activator 2 [Source:MGI Symbol;Acc:MGI:1919891]
ENSMUSG00000042672	16.5394	19.6277	21.1649	20.951	46.4188	45.9316	63.1771	47.5354	50.7657	19.5708	-1.37961	3.04454e-05	Dcst1	DC-STAMP domain containing 1 [Source:MGI Symbol;Acc:MGI:1925022]
ENSMUSG00000024672	14.5936	26.1703	22.1727	9.42795	190.317	82.4681	42.1181	52.0625	91.7414	18.0911	-2.34051	3.05967e-05	Ms4a7	membrane-spanning 4-domains, subfamily A, member 7 [Source:MGI Symbol;Acc:MGI:1918846]
ENSMUSG00000026972	276.306	228.056	218.704	252.459	148.54	140.926	130.017	170.901	147.596	243.881	0.727289	3.10087e-05	Arrdc1	arrestin domain containing 1 [Source:MGI Symbol;Acc:MGI:2446136]
ENSMUSG00000001444	4.86454	1.86931	1.00785	0	13.9256	26.0975	20.1434	19.2405	19.8518	1.93542	-3.33344	3.10087e-05	Tbx21	T-box 21 [Source:MGI Symbol;Acc:MGI:1888984]
ENSMUSG00000052392	1136.36	1230	1150.97	1518.95	477.185	752.652	673.889	851.109	688.709	1259.07	0.871217	3.1093e-05	Acot4	acyl-CoA thioesterase 4 [Source:MGI Symbol;Acc:MGI:2159621]
ENSMUSG00000033933	170.259	263.572	223.743	195.892	362.067	343.443	355.257	354.252	353.755	213.366	-0.728594	3.15379e-05	Vhl	von Hippel-Lindau tumor suppressor [Source:MGI Symbol;Acc:MGI:103223]
ENSMUSG00000044534	21.404	40.1901	34.2669	35.6167	8.35538	3.1317	3.66244	12.4497	6.89982	32.8694	2.27161	3.20298e-05	Ackr2	atypical chemokine receptor 2 [Source:MGI Symbol;Acc:MGI:1891697]
ENSMUSG00000015355	19.4582	23.3663	23.1806	13.6181	162.466	55.3267	48.5273	59.9851	81.5762	19.9058	-2.0351	3.20298e-05	Cd48	CD48 antigen [Source:MGI Symbol;Acc:MGI:88339]
ENSMUSG00000028706	502.02	545.838	534.161	541.583	664.717	751.608	789.256	749.248	738.707	530.901	-0.476395	3.21091e-05	Nsun4	NOL1/NOP2/Sun domain family, member 4 [Source:MGI Symbol;Acc:MGI:1919431]
ENSMUSG00000024767	986.528	985.125	1005.83	1172.21	617.37	652.437	673.889	814.892	689.647	1037.42	0.589892	3.21797e-05	Otub1	OTU domain, ubiquitin aldehyde binding 1 [Source:MGI Symbol;Acc:MGI:2147616]
ENSMUSG00000025086	530.235	539.295	592.616	510.157	395.488	388.331	395.543	368.965	387.082	543.076	0.487762	3.21806e-05	Trub1	TruB pseudouridine (psi) synthase family member 1 [Source:MGI Symbol;Acc:MGI:1919383]
ENSMUSG00000032047	16138.6	16248	16747.5	15726.9	19453.2	20933.3	22047.9	20141.4	20644	16215.2	-0.348379	3.24138e-05	Acat1	acetyl-Coenzyme A acetyltransferase 1 [Source:MGI Symbol;Acc:MGI:87870]
ENSMUSG00000026922	6863.86	5469.59	7687.88	13611.9	25669.6	27204	25975.9	50505.2	32338.7	8408.3	-1.94338	3.24138e-05	Agpat2	1-acylglycerol-3-phosphate O-acyltransferase 2 (lysophosphatidic acid acyltransferase, beta) [Source:MGI Symbol;Acc:MGI:1914762]
ENSMUSG00000021838	165.394	95.3347	268.088	113.135	60.3444	57.4145	53.1054	58.8533	57.4294	160.488	1.48255	3.24263e-05	Samd4	sterile alpha motif domain containing 4 [Source:MGI Symbol;Acc:MGI:1921730]
ENSMUSG00000061613	1271.59	1067.37	1220.51	1106.21	778.908	855.998	854.264	868.086	839.314	1166.42	0.475166	3.27521e-05	U2af1	U2 small nuclear ribonucleoprotein auxiliary factor (U2AF) 1 [Source:MGI Symbol;Acc:MGI:98884]
ENSMUSG00000027411	827.944	815.953	836.516	772.044	607.158	592.935	624.446	625.882	612.605	813.114	0.408713	3.31746e-05	Vps16	VSP16 CORVET/HOPS core subunit [Source:MGI Symbol;Acc:MGI:2136772]
ENSMUSG00000057101	412.513	444.895	446.478	434.733	603.444	588.76	729.741	602.115	631.015	434.655	-0.538709	3.31796e-05	Zfp180	zinc finger protein 180 [Source:MGI Symbol;Acc:MGI:1923701]
ENSMUSG00000039640	2038.24	1952.49	2035.86	2053.2	2431.42	2623.32	2829.23	2678.96	2640.73	2019.95	-0.386671	3.34333e-05	Mrpl12	mitochondrial ribosomal protein L12 [Source:MGI Symbol;Acc:MGI:1926273]
ENSMUSG00000068270	263.658	327.129	253.978	340.454	486.469	480.194	454.142	432.345	463.288	296.305	-0.645366	3.34333e-05	Shroom4	shroom family member 4 [Source:MGI Symbol;Acc:MGI:2685570]
ENSMUSG00000024130	819.188	1056.16	970.56	900.893	596.946	676.447	503.585	640.596	604.394	936.7	0.633206	3.35939e-05	Abca3	ATP-binding cassette, sub-family A (ABC1), member 3 [Source:MGI Symbol;Acc:MGI:1351617]
ENSMUSG00000019370	1565.41	1557.13	1566.2	1646.75	2397.07	2349.82	1930.11	2770.63	2361.91	1583.87	-0.576148	3.40805e-05	Calm3	calmodulin 3 [Source:MGI Symbol;Acc:MGI:103249]
ENSMUSG00000022437	10402.3	10277.5	9241.99	10394.8	7458.57	7605.85	7204.02	8260.97	7632.35	10079.2	0.401297	3.45877e-05	Samm50	SAMM50 sorting and assembly machinery component [Source:MGI Symbol;Acc:MGI:1915903]
ENSMUSG00000044573	1682.16	1600.13	1523.87	1619.51	1258.88	1265.21	1256.22	1189.52	1242.45	1606.42	0.370373	3.45877e-05	Acp1	acid phosphatase 1, soluble [Source:MGI Symbol;Acc:MGI:87881]
ENSMUSG00000010660	323.005	413.117	441.438	346.739	562.596	653.481	552.113	627.014	598.801	381.075	-0.651062	3.45877e-05	Plcd1	phospholipase C, delta 1 [Source:MGI Symbol;Acc:MGI:97614]
ENSMUSG00000055430	57.4015	74.7723	94.7379	147.705	215.383	183.726	248.13	399.523	261.691	93.6541	-1.48336	3.45877e-05	Nap1l5	nucleosome assembly protein 1-like 5 [Source:MGI Symbol;Acc:MGI:1923555]
ENSMUSG00000098882	2.91872	4.67327	12.0942	4.1902	64.9863	10.439	46.6961	52.0625	43.546	5.9691	-2.8716	3.45877e-05	Mir6392	microRNA 6392 [Source:MGI Symbol;Acc:MGI:5530813]
ENSMUSG00000049775	2842.84	3257.27	3270.47	2610.49	8192.92	5458.55	4320.76	4747.88	5680.03	2995.27	-0.923242	3.46774e-05	Tmsb4x	thymosin, beta 4, X chromosome [Source:MGI Symbol;Acc:MGI:99510]
ENSMUSG00000001016	881.454	856.143	850.626	783.567	644.293	643.042	610.712	571.556	617.401	842.948	0.448859	3.50366e-05	Ilf2	interleukin enhancer binding factor 2 [Source:MGI Symbol;Acc:MGI:1915031]
ENSMUSG00000036913	559.422	509.386	413.219	624.34	960.869	711.94	923.85	955.234	887.973	526.592	-0.754176	3.50578e-05	Trim67	tripartite motif-containing 67 [Source:MGI Symbol;Acc:MGI:3045323]
ENSMUSG00000040061	7.78326	8.41188	5.03925	7.33285	77.9836	29.2292	19.2278	32.822	39.8157	7.14181	-2.47916	3.52511e-05	Plcb2	phospholipase C, beta 2 [Source:MGI Symbol;Acc:MGI:107465]
ENSMUSG00000020402	11528	11140.1	12097.2	11975.6	8812.15	9369	8654.34	9645.15	9120.16	11685.2	0.357639	3.52835e-05	Vdac1	voltage-dependent anion channel 1 [Source:MGI Symbol;Acc:MGI:106919]
ENSMUSG00000027562	600.284	749.592	721.621	504.919	377.849	385.199	435.83	370.097	392.244	644.104	0.715406	3.53856e-05	Car2	carbonic anhydrase 2 [Source:MGI Symbol;Acc:MGI:88269]
ENSMUSG00000030109	61.2932	53.2753	43.3376	64.9481	13.9256	30.2731	14.6498	18.1087	19.2393	55.7135	1.54278	3.54759e-05	Slc6a12	solute carrier family 6 (neurotransmitter transporter, betaine/GABA), member 12 [Source:MGI Symbol;Acc:MGI:95628]
ENSMUSG00000051506	34.0518	22.4317	43.3376	20.951	172.678	87.6876	55.8522	96.2025	103.105	30.193	-1.77274	3.54759e-05	Wdfy4	WD repeat and FYVE domain containing 4 [Source:MGI Symbol;Acc:MGI:3584510]
ENSMUSG00000057440	152.746	164.499	181.413	141.419	334.215	254.712	286.586	227.491	275.751	160.019	-0.787007	3.56624e-05	Mpp7	membrane protein, palmitoylated 7 (MAGUK p55 subfamily member 7) [Source:MGI Symbol;Acc:MGI:1922989]
ENSMUSG00000046312	448.51	418.725	590.6	389.689	829.968	938.466	753.547	665.495	796.869	461.881	-0.78708	3.57303e-05	AI464131	expressed sequence AI464131 [Source:MGI Symbol;Acc:MGI:2140300]
ENSMUSG00000002588	128.424	115.897	161.256	83.804	283.155	366.409	514.573	173.165	334.325	122.345	-1.45111	3.60511e-05	Pon1	paraoxonase 1 [Source:MGI Symbol;Acc:MGI:103295]
ENSMUSG00000042709	2702.74	2741.34	2643.59	2936.28	3507.4	3497.06	4134.89	4212.54	3837.98	2755.99	-0.477743	3.71492e-05	Atpaf2	ATP synthase mitochondrial F1 complex assembly factor 2 [Source:MGI Symbol;Acc:MGI:2180561]
ENSMUSG00000039474	445.592	528.079	706.503	613.864	354.64	294.38	306.729	372.36	332.027	573.51	0.788613	3.73748e-05	Wfs1	wolframin ER transmembrane glycoprotein [Source:MGI Symbol;Acc:MGI:1328355]
ENSMUSG00000063889	623.634	610.329	575.483	519.585	387.133	397.726	432.168	415.369	408.099	582.257	0.513303	3.73945e-05	Crem	cAMP responsive element modulator [Source:MGI Symbol;Acc:MGI:88495]
ENSMUSG00000030247	355.111	345.822	459.58	377.118	559.811	657.657	593.315	863.559	668.586	384.408	-0.797613	3.78128e-05	Kcnj8	potassium inwardly-rectifying channel, subfamily J, member 8 [Source:MGI Symbol;Acc:MGI:1100508]
ENSMUSG00000038179	2.91872	9.34654	8.0628	2.0951	138.328	20.878	26.5527	29.4267	53.7963	5.60579	-3.2585	3.82178e-05	Slamf7	SLAM family member 7 [Source:MGI Symbol;Acc:MGI:1922595]
ENSMUSG00000022131	645.038	588.832	577.498	595.008	388.99	459.316	393.712	447.059	422.269	601.594	0.512369	3.83439e-05	Gpr180	G protein-coupled receptor 180 [Source:MGI Symbol;Acc:MGI:1930949]
ENSMUSG00000022092	641.146	548.642	588.585	620.149	310.078	468.711	286.586	324.825	347.55	599.63	0.787845	3.8576e-05	Ppp3cc	protein phosphatase 3, catalytic subunit, gamma isoform [Source:MGI Symbol;Acc:MGI:107162]
ENSMUSG00000066894	180.961	172.911	221.727	184.369	107.692	108.566	119.029	122.234	114.38	189.992	0.73238	3.89337e-05	Vsig10	V-set and immunoglobulin domain containing 10 [Source:MGI Symbol;Acc:MGI:2448533]
ENSMUSG00000019528	3335.13	3325.5	4257.16	3747.09	2240.17	2381.14	2812.75	2417.51	2462.89	3666.22	0.573768	3.8975e-05	Gyg	glycogenin [Source:MGI Symbol;Acc:MGI:1351614]
ENSMUSG00000001774	519.533	663.604	632.93	687.193	1188.32	925.939	1049.29	849.978	1003.38	625.815	-0.681944	3.90652e-05	Chordc1	cysteine and histidine-rich domain (CHORD)-containing, zinc-binding protein 1 [Source:MGI Symbol;Acc:MGI:1914167]
ENSMUSG00000044921	43.7808	60.7525	62.4867	60.7579	91.9092	123.18	118.114	175.428	127.158	56.9445	-1.15564	4.02238e-05	Rassf9	Ras association (RalGDS/AF-6) domain family (N-terminal) member 9 [Source:MGI Symbol;Acc:MGI:2384307]
ENSMUSG00000020069	1485.63	1758.08	1631.71	1477.05	1125.19	1220.32	1158.25	1031.06	1133.71	1588.12	0.48616	4.02594e-05	Hnrnph3	heterogeneous nuclear ribonucleoprotein H3 [Source:MGI Symbol;Acc:MGI:1926462]
ENSMUSG00000038459	551.639	593.505	667.197	549.964	889.384	845.559	767.281	881.668	845.973	590.576	-0.51809	4.04985e-05	Abhd17c	abhydrolase domain containing 17C [Source:MGI Symbol;Acc:MGI:1917428]
ENSMUSG00000037085	72.9681	83.1842	75.5888	102.66	133.686	138.839	176.713	175.428	156.166	83.6002	-0.902329	4.07845e-05	Trmt12	tRNA methyltranferase 12 [Source:MGI Symbol;Acc:MGI:1915510]
ENSMUSG00000036412	6.81035	11.2158	13.1021	13.6181	114.19	45.9316	17.3966	67.9077	61.3565	11.1866	-2.45776	4.13818e-05	Arsi	arylsulfatase i [Source:MGI Symbol;Acc:MGI:2670959]
ENSMUSG00000020840	572.07	557.054	593.624	635.863	818.828	855.998	741.644	870.35	821.705	589.652	-0.478433	4.1712e-05	Blmh	bleomycin hydrolase [Source:MGI Symbol;Acc:MGI:1345186]
ENSMUSG00000022512	830.863	610.329	326.544	477.683	196.816	83.512	138.257	296.53	178.779	561.355	1.65214	4.17442e-05	Cldn1	claudin 1 [Source:MGI Symbol;Acc:MGI:1276109]
ENSMUSG00000024359	52643.1	54171.6	43631.9	61548.8	37423.8	37604.4	34362.8	35545.1	36234	52998.8	0.548613	4.2361e-05	Hspa9	heat shock protein 9 [Source:MGI Symbol;Acc:MGI:96245]
ENSMUSG00000070709	122.586	158.891	100.785	121.516	270.157	258.887	249.046	177.692	238.946	125.945	-0.924262	4.24555e-05	Zfp974	zinc finger protein 974 [Source:MGI Symbol;Acc:MGI:1920680]
ENSMUSG00000027893	28984.9	25727.3	22781.5	25605.3	18590.7	19743.3	15478.4	15850.8	17415.8	25774.7	0.565562	4.31349e-05	Ahcyl1	S-adenosylhomocysteine hydrolase-like 1 [Source:MGI Symbol;Acc:MGI:2385184]
ENSMUSG00000030852	1632.54	864.555	2742.36	1126.12	475.329	476.018	752.631	648.518	588.124	1591.39	1.43601	4.32792e-05	Tacc2	transforming, acidic coiled-coil containing protein 2 [Source:MGI Symbol;Acc:MGI:1928899]
ENSMUSG00000029598	1730.8	2017.92	1947.17	1763.03	1060.21	1177.52	1349.61	1422.67	1252.5	1864.73	0.574617	4.36173e-05	Plbd2	phospholipase B domain containing 2 [Source:MGI Symbol;Acc:MGI:1919022]
ENSMUSG00000026864	11290.6	13417.9	9869.88	11768.2	8554.99	8231.15	7283.68	7689.41	7939.81	11586.6	0.545306	4.36208e-05	Hspa5	heat shock protein 5 [Source:MGI Symbol;Acc:MGI:95835]
ENSMUSG00000019368	657.686	891.66	801.241	770.997	525.461	538.652	539.294	522.889	531.574	780.396	0.55403	4.38363e-05	Sec14l4	SEC14-like lipid binding 4 [Source:MGI Symbol;Acc:MGI:2144095]
ENSMUSG00000021356	17015.2	38814.3	44310.1	31823.5	3321.73	6734.2	954.065	574.952	2896.24	32990.8	3.50981	4.38622e-05	Irf4	interferon regulatory factor 4 [Source:MGI Symbol;Acc:MGI:1096873]
ENSMUSG00000041895	792.92	618.741	860.704	727	485.541	522.994	481.611	496.858	496.751	749.841	0.594058	4.43385e-05	Wipi1	WD repeat domain, phosphoinositide interacting 1 [Source:MGI Symbol;Acc:MGI:1261864]
ENSMUSG00000037907	181.934	173.846	189.476	188.559	116.975	86.6437	111.704	122.234	109.389	183.454	0.745345	4.43544e-05	Ankrd13b	ankyrin repeat domain 13b [Source:MGI Symbol;Acc:MGI:2144501]
ENSMUSG00000026558	775.407	814.083	824.422	888.322	583.02	568.925	567.678	659.836	594.865	825.559	0.473583	4.43544e-05	Uck2	uridine-cytidine kinase 2 [Source:MGI Symbol;Acc:MGI:1931744]
ENSMUSG00000003528	11721.6	8147.38	10097.7	13550.1	18674.3	27506.8	14957.4	26462.5	21900.2	10879.2	-1.00937	4.43544e-05	Slc25a1	solute carrier family 25 (mitochondrial carrier, citrate transporter), member 1 [Source:MGI Symbol;Acc:MGI:1345283]
ENSMUSG00000042549	55.4557	63.5565	62.4867	59.7103	104.907	115.873	100.717	114.311	108.952	60.3023	-0.851003	4.52452e-05	Map2k3os	mitogen-activated protein kinase kinase 3, opposite strand [Source:MGI Symbol;Acc:MGI:1344334]
ENSMUSG00000010755	919.398	826.234	684.33	861.086	594.161	333.004	439.493	468.563	458.805	822.762	0.841966	4.53598e-05	Cars	cysteinyl-tRNA synthetase [Source:MGI Symbol;Acc:MGI:1351477]
ENSMUSG00000021241	1428.23	1473.95	1380.76	1726.36	1967.23	2127.47	2106.82	2355.26	2139.19	1502.32	-0.509762	4.62766e-05	Isca2	iron-sulfur cluster assembly 2 [Source:MGI Symbol;Acc:MGI:1921566]
ENSMUSG00000021786	785.136	839.319	835.508	936.509	1129.83	1114.89	1179.31	1143.11	1141.78	849.118	-0.427756	4.6768e-05	Oxsm	3-oxoacyl-ACP synthase, mitochondrial [Source:MGI Symbol;Acc:MGI:1918397]
ENSMUSG00000041959	1176.25	1147.75	965.521	1284.3	2301.44	1757.93	1517.17	1873.12	1862.41	1143.45	-0.703853	4.8041e-05	S100a10	S100 calcium binding protein A10 (calpactin) [Source:MGI Symbol;Acc:MGI:1339468]
ENSMUSG00000001143	859.077	891.66	911.097	904.035	1177.18	1095.05	1311.15	1321.94	1226.33	891.467	-0.460091	4.80625e-05	Lman2l	lectin, mannose-binding 2-like [Source:MGI Symbol;Acc:MGI:2443010]
ENSMUSG00000033454	200.419	177.584	143.115	203.225	340.714	306.907	339.691	252.39	309.926	181.086	-0.777228	4.8302e-05	Zbtb1	zinc finger and BTB domain containing 1 [Source:MGI Symbol;Acc:MGI:2442326]
ENSMUSG00000035765	1057.55	1178.6	1278.96	1143.92	748.271	873.744	796.581	885.063	825.915	1164.76	0.496768	4.86724e-05	Dym	dymeclin [Source:MGI Symbol;Acc:MGI:1918480]
ENSMUSG00000041633	164.421	185.996	188.468	224.176	350.926	344.487	321.379	255.786	318.144	190.765	-0.740351	4.86724e-05	Kctd12b	potassium channel tetramerisation domain containing 12b [Source:MGI Symbol;Acc:MGI:2444667]
ENSMUSG00000041777	533.153	471.065	519.043	512.252	375.064	322.565	358.919	270.499	331.762	508.878	0.614399	4.89378e-05	Cir1	corepressor interacting with RBPJ, 1 [Source:MGI Symbol;Acc:MGI:1914185]
ENSMUSG00000016427	5994.08	5153.68	5989.66	5329.93	7061.23	8528.66	8517	7489.08	7898.99	5616.84	-0.491931	4.89378e-05	Ndufa1	NADH:ubiquinone oxidoreductase subunit A1 [Source:MGI Symbol;Acc:MGI:1929511]
ENSMUSG00000072647	20.4311	19.6277	26.2041	15.7132	46.4188	61.5901	46.6961	54.3261	52.2578	20.494	-1.34624	4.93768e-05	Adam1a	a disintegrin and metallopeptidase domain 1a [Source:MGI Symbol;Acc:MGI:2429504]
ENSMUSG00000029446	391.109	372.927	329.567	503.871	675.858	724.467	564.931	666.627	657.971	399.369	-0.720518	5.1214e-05	Psph	phosphoserine phosphatase [Source:MGI Symbol;Acc:MGI:97788]
ENSMUSG00000025902	676.171	782.305	851.634	741.665	417.769	507.335	568.594	502.517	499.054	762.944	0.612416	5.15961e-05	Sox17	SRY (sex determining region Y)-box 17 [Source:MGI Symbol;Acc:MGI:107543]
ENSMUSG00000042814	132.315	129.917	151.178	195.892	233.951	267.238	314.97	262.576	269.684	152.325	-0.826481	5.19404e-05	Mcts2	malignant T cell amplified sequence 2 [Source:MGI Symbol;Acc:MGI:1913655]
ENSMUSG00000025969	1593.62	2058.11	1661.95	2380.03	3711.65	3026.27	2706.54	4129.92	3393.59	1923.43	-0.819077	5.23225e-05	Nrp2	neuropilin 2 [Source:MGI Symbol;Acc:MGI:1100492]
ENSMUSG00000022421	85.6159	128.048	101.793	119.421	66.8431	43.8438	51.2742	44.14	51.5253	108.719	1.07173	5.23677e-05	Nptxr	neuronal pentraxin receptor [Source:MGI Symbol;Acc:MGI:1920590]
ENSMUSG00000022982	14086.7	13129.1	14674.3	14986.2	9933.62	11472.5	11140.2	10186.1	10683.1	14219.1	0.412463	5.23677e-05	Sod1	superoxide dismutase 1, soluble [Source:MGI Symbol;Acc:MGI:98351]
ENSMUSG00000043940	949.558	958.02	1006.84	892.512	1370.28	1274.6	1226	1211.02	1270.48	951.733	-0.416924	5.3903e-05	Wdfy3	WD repeat and FYVE domain containing 3 [Source:MGI Symbol;Acc:MGI:1096875]
ENSMUSG00000030787	244.2	299.089	251.963	280.743	169.893	165.98	100.717	90.5435	131.783	268.999	1.02787	5.42636e-05	Lyve1	lymphatic vessel endothelial hyaluronan receptor 1 [Source:MGI Symbol;Acc:MGI:2136348]
ENSMUSG00000020377	123.559	72.903	100.785	109.993	304.507	200.429	167.557	196.932	217.356	101.81	-1.09603	5.42848e-05	Ltc4s	leukotriene C4 synthase [Source:MGI Symbol;Acc:MGI:107498]
ENSMUSG00000037966	1530.38	1459.93	1496.66	1265.44	956.227	967.695	1147.26	926.94	999.53	1438.1	0.524426	5.46821e-05	Ninj1	ninjurin 1 [Source:MGI Symbol;Acc:MGI:1196617]
ENSMUSG00000000682	48.6454	27.105	39.3062	28.2838	248.805	132.575	56.7678	95.0707	133.305	35.8351	-1.89603	5.48918e-05	Cd52	CD52 antigen [Source:MGI Symbol;Acc:MGI:1346088]
ENSMUSG00000046897	2146.23	2248.78	2025.78	2241.76	1601.45	1457.28	1759.8	1606.02	1606.14	2165.64	0.4309	5.64822e-05	Zfp740	zinc finger protein 740 [Source:MGI Symbol;Acc:MGI:1915994]
ENSMUSG00000020522	339.545	280.396	298.324	361.405	529.174	461.404	474.286	454.981	479.961	319.917	-0.586807	5.67999e-05	Mfap3	microfibrillar-associated protein 3 [Source:MGI Symbol;Acc:MGI:1924068]
ENSMUSG00000075590	3466.47	3939.57	4020.32	3219.12	1889.25	2516.84	2737.67	2196.81	2335.14	3661.37	0.648873	5.82508e-05	Nrbp2	nuclear receptor binding protein 2 [Source:MGI Symbol;Acc:MGI:2385017]
ENSMUSG00000024826	1508.98	1616.02	1531.93	1509.52	1016.57	1011.54	1099.65	1276.66	1101.11	1541.61	0.486259	5.88627e-05	Dpf2	D4, zinc and double PHD fingers family 2 [Source:MGI Symbol;Acc:MGI:109529]
ENSMUSG00000002204	6.81035	1.86931	6.0471	2.0951	52.9174	20.878	21.059	19.2405	28.5237	4.20547	-2.76673	5.88627e-05	Napsa	napsin A aspartic peptidase [Source:MGI Symbol;Acc:MGI:109365]
ENSMUSG00000027204	317.168	207.493	205.601	190.654	747.343	460.36	339.691	497.99	511.346	230.229	-1.15105	5.88916e-05	Fbn1	fibrillin 1 [Source:MGI Symbol;Acc:MGI:95489]
ENSMUSG00000000605	1299.8	1347.77	1308.19	1300.01	1591.24	1695.29	1878.83	1770.13	1733.87	1313.94	-0.400005	5.89771e-05	Clcn4	chloride channel, voltage-sensitive 4 [Source:MGI Symbol;Acc:MGI:104571]
ENSMUSG00000030727	735.518	888.856	758.911	677.765	449.334	589.803	456.889	475.354	492.845	765.262	0.635863	5.93529e-05	Rabep2	rabaptin, RAB GTPase binding effector protein 2 [Source:MGI Symbol;Acc:MGI:1917564]
ENSMUSG00000061086	171.232	135.525	138.076	123.611	51.9891	72.0291	73.2488	91.6753	72.2356	142.111	0.982465	5.94413e-05	Myl4	myosin, light polypeptide 4 [Source:MGI Symbol;Acc:MGI:97267]
ENSMUSG00000020486	250.037	278.527	268.088	252.459	387.133	372.672	408.362	548.92	429.272	262.278	-0.70895	6.02898e-05	44443	septin 4 [Source:MGI Symbol;Acc:MGI:1270156]
ENSMUSG00000022462	4182.53	3134.83	2764.53	2238.61	1598.66	1916.6	1813.82	1486.05	1703.78	3080.13	0.854256	6.11612e-05	Slc38a2	solute carrier family 38, member 2 [Source:MGI Symbol;Acc:MGI:1915010]
ENSMUSG00000024513	1750.26	1805.75	1913.91	1856.26	1342.43	1519.92	1353.27	1380.79	1399.1	1831.54	0.388757	6.14359e-05	Mbd2	methyl-CpG binding domain protein 2 [Source:MGI Symbol;Acc:MGI:1333813]
ENSMUSG00000037933	1327.05	1611.34	1446.27	1388	2436.06	1819.52	2079.35	2638.21	2243.28	1443.16	-0.636149	6.14359e-05	Bicd2	BICD cargo adaptor 2 [Source:MGI Symbol;Acc:MGI:1924145]
ENSMUSG00000040552	54.4828	45.798	39.3062	34.5691	434.48	100.214	75.08	151.66	190.359	43.539	-2.12839	6.14359e-05	C3ar1	complement component 3a receptor 1 [Source:MGI Symbol;Acc:MGI:1097680]
ENSMUSG00000038773	1199.6	1230.94	1190.27	1188.97	889.384	941.598	974.209	842.055	911.811	1202.44	0.398578	6.18565e-05	Kdm3b	KDM3B lysine (K)-specific demethylase 3B [Source:MGI Symbol;Acc:MGI:1923356]
ENSMUSG00000051627	10.702	2.80396	18.1413	9.42795	82.6255	44.8877	22.8902	62.2487	53.163	10.2688	-2.37728	6.29074e-05	Hist1h1e	histone cluster 1, H1e [Source:MGI Symbol;Acc:MGI:1931527]
ENSMUSG00000018459	4.86454	6.54258	3.02355	5.23775	26.9229	22.9658	15.5654	32.822	24.569	4.9171	-2.31018	6.34781e-05	Slc13a3	solute carrier family 13 (sodium-dependent dicarboxylate transporter), member 3 [Source:MGI Symbol;Acc:MGI:2149635]
ENSMUSG00000000627	3.89163	0	6.0471	1.04755	23.2094	19.8341	19.2278	20.3723	20.6609	2.74657	-2.92071	6.34781e-05	Sema4f	sema domain, immunoglobulin domain (Ig), TM domain, and short cytoplasmic domain [Source:MGI Symbol;Acc:MGI:1340055]
ENSMUSG00000024378	98.2637	73.8376	63.4946	78.5662	175.463	130.487	129.101	167.506	150.639	78.5405	-0.938557	6.37792e-05	Stard4	StAR-related lipid transfer (START) domain containing 4 [Source:MGI Symbol;Acc:MGI:2156764]
ENSMUSG00000032915	2.91872	3.73861	5.03925	1.04755	26.9229	16.7024	15.5654	22.6359	20.4566	3.18603	-2.67375	6.37792e-05	Adgre4	adhesion G protein-coupled receptor E4 [Source:MGI Symbol;Acc:MGI:1196464]
ENSMUSG00000029838	9.72908	11.2158	5.03925	4.1902	39.9202	27.1414	23.8059	32.822	30.9224	7.54359	-2.02253	6.41159e-05	Ptn	pleiotrophin [Source:MGI Symbol;Acc:MGI:97804]
ENSMUSG00000026389	192.636	247.683	235.837	188.559	362.067	341.355	332.366	313.507	337.324	216.179	-0.641646	6.4421e-05	Steap3	STEAP family member 3 [Source:MGI Symbol;Acc:MGI:1915678]
ENSMUSG00000020641	1094.52	1307.58	1303.15	829.659	809.544	431.131	551.197	479.881	567.938	1133.73	0.996599	6.50699e-05	Rsad2	radical S-adenosyl methionine domain containing 2 [Source:MGI Symbol;Acc:MGI:1929628]
ENSMUSG00000004266	49.6183	57.9485	34.2669	49.2348	259.017	117.961	75.9956	133.552	146.631	47.7671	-1.61791	6.50971e-05	Ptpn6	protein tyrosine phosphatase, non-receptor type 6 [Source:MGI Symbol;Acc:MGI:96055]
ENSMUSG00000021823	574.988	495.366	553.31	544.726	730.632	734.906	764.534	706.24	734.078	542.098	-0.438169	6.54051e-05	Vcl	vinculin [Source:MGI Symbol;Acc:MGI:98927]
ENSMUSG00000004864	23.3498	27.105	55.4318	28.2838	5.57026	9.3951	10.0717	3.39538	7.10811	33.5426	2.22458	6.56504e-05	Mapk13	mitogen-activated protein kinase 13 [Source:MGI Symbol;Acc:MGI:1346864]
ENSMUSG00000026473	147014	116274	152368	125342	68834.4	100756	87757.5	64949.2	80574.3	135250	0.747229	6.64918e-05	Glul	glutamate-ammonia ligase (glutamine synthetase) [Source:MGI Symbol;Acc:MGI:95739]
ENSMUSG00000020152	1280.35	1310.38	1445.26	1180.59	2384.07	1939.57	1903.55	1678.45	1976.41	1304.14	-0.60008	6.81696e-05	Actr2	ARP2 actin-related protein 2 [Source:MGI Symbol;Acc:MGI:1913963]
ENSMUSG00000025488	18526.1	19705.3	23196.7	18112.1	27737.1	31321.2	34439.7	25922.6	29855.2	19885.1	-0.586313	6.89767e-05	Cox8b	cytochrome c oxidase subunit 8B [Source:MGI Symbol;Acc:MGI:105958]
ENSMUSG00000024665	84.643	74.7723	80.628	49.2348	143.898	127.356	131.848	194.669	149.443	72.3195	-1.04283	6.91751e-05	Fads2	fatty acid desaturase 2 [Source:MGI Symbol;Acc:MGI:1930079]
ENSMUSG00000091537	1294.94	1143.08	1282.99	1252.87	1560.6	1719.3	1714.94	1585.64	1645.12	1243.47	-0.404081	6.94159e-05	Tma7	translational machinery associated 7 [Source:MGI Symbol;Acc:MGI:1913417]
ENSMUSG00000006378	52.537	43.9287	41.3219	31.4265	85.4106	73.073	95.2234	107.52	90.3069	42.3035	-1.08983	6.94159e-05	Gcat	glycine C-acetyltransferase (2-amino-3-ketobutyrate-coenzyme A ligase) [Source:MGI Symbol;Acc:MGI:1349389]
ENSMUSG00000044162	0	0	0	0	23.2094	3.1317	10.9873	7.92256	11.3127	0	-5.96394	6.95088e-05	Tnip3	TNFAIP3 interacting protein 3 [Source:MGI Symbol;Acc:MGI:3041165]
ENSMUSG00000024426	351.22	525.275	449.501	640.053	863.39	871.656	786.509	1197.44	929.748	491.512	-0.919391	6.97209e-05	Atat1	alpha tubulin acetyltransferase 1 [Source:MGI Symbol;Acc:MGI:1913869]
ENSMUSG00000036678	311.33	396.293	334.606	346.739	220.954	211.912	175.797	252.39	215.263	347.242	0.692749	7.05965e-05	Aaas	achalasia, adrenocortical insufficiency, alacrimia [Source:MGI Symbol;Acc:MGI:2443767]
ENSMUSG00000032437	4867.46	4737.76	4286.39	4922.44	3446.13	3741.34	3744.84	3523.28	3613.9	4703.51	0.380159	7.08507e-05	Stt3b	STT3, subunit of the oligosaccharyltransferase complex, homolog B (S. cerevisiae) [Source:MGI Symbol;Acc:MGI:1915542]
ENSMUSG00000057738	6176.02	5465.85	5347.65	5349.84	8075.02	7480.59	7161.9	7053.34	7442.71	5584.84	-0.41434	7.18908e-05	Sptan1	spectrin alpha, non-erythrocytic 1 [Source:MGI Symbol;Acc:MGI:98386]
ENSMUSG00000038623	97.2908	95.3347	96.7536	114.183	269.229	197.297	130.017	250.127	211.667	100.891	-1.06853	7.26241e-05	Tm6sf1	transmembrane 6 superfamily member 1 [Source:MGI Symbol;Acc:MGI:1933209]
ENSMUSG00000017999	1201.54	1103.83	1142.9	1042.31	828.111	871.656	841.445	864.691	851.476	1122.65	0.399383	7.33419e-05	Ddx27	DEAD (Asp-Glu-Ala-Asp) box polypeptide 27 [Source:MGI Symbol;Acc:MGI:2385884]
ENSMUSG00000031431	4589.2	4231.18	4319.65	3777.46	2112.06	1791.33	2446.51	752.643	1775.64	4229.37	1.25178	7.47457e-05	Tsc22d3	TSC22 domain family, member 3 [Source:MGI Symbol;Acc:MGI:1196284]
ENSMUSG00000031144	188.744	203.755	153.193	149.8	259.945	260.975	313.139	327.089	290.287	173.873	-0.73713	7.57461e-05	Syp	synaptophysin [Source:MGI Symbol;Acc:MGI:98467]
ENSMUSG00000001918	10905.3	10767.2	10247.8	11642.5	13166.2	16372.5	15206.4	14368.1	14778.3	10890.7	-0.440382	7.64936e-05	Slc1a5	solute carrier family 1 (neutral amino acid transporter), member 5 [Source:MGI Symbol;Acc:MGI:105305]
ENSMUSG00000022270	2259.09	923.438	2778.64	929.177	505.037	316.302	488.02	202.591	377.987	1722.59	2.18766	7.66861e-05	Retreg1	reticulophagy regulator 1 [Source:MGI Symbol;Acc:MGI:1913520]
ENSMUSG00000053898	23037.5	22360.7	23139.2	20000.9	27338.8	30497.5	31788.1	28434.1	29514.6	22134.6	-0.415125	7.75294e-05	Ech1	enoyl coenzyme A hydratase 1, peroxisomal [Source:MGI Symbol;Acc:MGI:1858208]
ENSMUSG00000057604	624.607	196.277	1050.18	516.442	104.907	96.0388	150.16	151.66	125.691	596.877	2.24758	7.99235e-05	Lmcd1	LIM and cysteine-rich domains 1 [Source:MGI Symbol;Acc:MGI:1353635]
ENSMUSG00000058740	23.3498	27.105	26.2041	20.951	2.78513	4.1756	8.24049	6.79077	5.498	24.4025	2.15377	8.03654e-05	Kcnt1	potassium channel, subfamily T, member 1 [Source:MGI Symbol;Acc:MGI:1924627]
ENSMUSG00000014773	32.1059	48.602	43.3376	35.6167	72.4133	88.7315	86.0673	153.924	100.284	39.9156	-1.32303	8.10981e-05	Dll1	delta like canonical Notch ligand 1 [Source:MGI Symbol;Acc:MGI:104659]
ENSMUSG00000026172	486.454	540.23	486.792	466.16	619.227	752.652	732.488	857.9	740.567	494.909	-0.580007	8.11012e-05	Bcs1l	BCS1-like (yeast) [Source:MGI Symbol;Acc:MGI:1914071]
ENSMUSG00000023010	15225	20275.4	18339.9	23850.6	11715.2	11763.7	12311.3	13702.6	12373.2	19422.7	0.650539	8.13847e-05	Tmbim6	transmembrane BAX inhibitor motif containing 6 [Source:MGI Symbol;Acc:MGI:99682]
ENSMUSG00000040723	456.294	548.642	720.613	490.253	371.35	336.136	276.514	289.739	318.435	553.95	0.798333	8.21898e-05	Rcsd1	RCSD domain containing 1 [Source:MGI Symbol;Acc:MGI:2676394]
ENSMUSG00000008734	1470.06	1609.47	1526.89	1538.85	2306.09	2678.65	1961.24	3476.87	2605.71	1536.32	-0.761801	8.22019e-05	Gprc5b	G protein-coupled receptor, family C, group 5, member B [Source:MGI Symbol;Acc:MGI:1927596]
ENSMUSG00000032309	851.294	838.384	760.927	910.321	1199.46	1508.44	1378.91	1052.57	1284.84	840.232	-0.613088	8.25898e-05	Fbxo22	F-box protein 22 [Source:MGI Symbol;Acc:MGI:1926014]
ENSMUSG00000025364	1880.63	2024.46	1913.91	1927.49	1472.4	1532.45	1508.93	1600.36	1528.53	1936.62	0.341905	8.27582e-05	Pa2g4	proliferation-associated 2G4 [Source:MGI Symbol;Acc:MGI:894684]
ENSMUSG00000011114	494.237	617.806	555.326	527.965	372.279	331.96	305.814	416.5	356.638	548.833	0.623671	8.31012e-05	Tbrg1	transforming growth factor beta regulated gene 1 [Source:MGI Symbol;Acc:MGI:1100877]
ENSMUSG00000033446	396.946	691.644	570.443	471.397	924.663	1098.18	814.893	920.149	939.472	532.608	-0.818192	8.35108e-05	Lpar6	lysophosphatidic acid receptor 6 [Source:MGI Symbol;Acc:MGI:1914418]
ENSMUSG00000070495	308.412	188.8	182.421	272.363	568.166	441.57	448.649	370.097	457.12	237.999	-0.942812	8.35396e-05	Ctcfl	CCCTC-binding factor (zinc finger protein)-like [Source:MGI Symbol;Acc:MGI:3652571]
ENSMUSG00000059689	470.887	560.792	550.286	565.677	341.642	350.75	411.109	372.36	368.965	536.911	0.540666	8.3854e-05	Zfp637	zinc finger protein 637 [Source:MGI Symbol;Acc:MGI:2448537]
ENSMUSG00000005674	476.725	563.596	491.831	520.632	687.927	693.15	765.45	888.459	758.746	513.196	-0.563119	8.55061e-05	Tomm40l	translocase of outer mitochondrial membrane 40-like [Source:MGI Symbol;Acc:MGI:3589112]
ENSMUSG00000058396	246.146	400.032	349.724	299.599	165.251	180.595	146.498	217.305	177.412	323.875	0.871454	8.56242e-05	Gpr182	G protein-coupled receptor 182 [Source:MGI Symbol;Acc:MGI:109545]
ENSMUSG00000001999	1419.47	1342.16	1140.89	1572.37	945.087	900.886	596.062	810.365	813.1	1368.72	0.751518	8.56242e-05	Blvra	biliverdin reductase A [Source:MGI Symbol;Acc:MGI:88170]
ENSMUSG00000036580	644.065	740.246	644.016	768.902	470.687	503.16	520.982	493.462	497.073	699.307	0.492318	8.56516e-05	Spg20	spastic paraplegia 20, spartin (Troyer syndrome) homolog (human) [Source:MGI Symbol;Acc:MGI:2139806]
ENSMUSG00000037148	288.954	285.069	390.038	303.789	203.314	173.287	176.713	218.436	192.938	316.963	0.716918	8.58676e-05	Arhgap10	Rho GTPase activating protein 10 [Source:MGI Symbol;Acc:MGI:1925764]
ENSMUSG00000075376	447.537	423.398	407.172	402.259	558.882	676.447	759.956	564.765	640.013	420.092	-0.607828	8.60478e-05	Rc3h2	ring finger and CCCH-type zinc finger domains 2 [Source:MGI Symbol;Acc:MGI:2442789]
ENSMUSG00000022237	200.419	103.747	371.897	216.843	90.9809	85.5998	67.7551	80.3574	81.1733	223.226	1.459	8.61772e-05	Ankrd33b	ankyrin repeat domain 33B [Source:MGI Symbol;Acc:MGI:1917904]
ENSMUSG00000028874	1.94582	4.67327	8.0628	8.3804	100.265	14.6146	19.2278	48.6672	45.6935	5.76557	-2.99469	8.66336e-05	Fgr	FGR proto-oncogene, Src family tyrosine kinase [Source:MGI Symbol;Acc:MGI:95527]
ENSMUSG00000039783	9.72908	12.1505	12.0942	10.4755	55.7026	39.6682	27.4683	28.2949	37.7835	11.1123	-1.76808	8.67208e-05	Kmo	kynurenine 3-monooxygenase (kynurenine 3-hydroxylase) [Source:MGI Symbol;Acc:MGI:2138151]
ENSMUSG00000027257	728.708	743.984	1222.52	787.757	443.764	390.419	517.32	544.393	473.974	870.743	0.877471	8.77054e-05	Pacsin3	protein kinase C and casein kinase substrate in neurons 3 [Source:MGI Symbol;Acc:MGI:1891410]
ENSMUSG00000044350	55.4557	34.5822	39.3062	46.0922	144.827	80.3803	86.0673	95.0707	101.586	43.8591	-1.21464	8.80976e-05	Lacc1	laccase domain containing 1 [Source:MGI Symbol;Acc:MGI:2445077]
ENSMUSG00000073468	450.456	400.966	416.242	481.873	623.869	599.199	585.99	706.24	628.824	437.384	-0.523395	8.88367e-05	Sft2d1	SFT2 domain containing 1 [Source:MGI Symbol;Acc:MGI:1918689]
ENSMUSG00000018983	25.2956	24.301	27.212	57.6152	152.254	50.1072	97.0546	228.622	132.009	33.6059	-1.97573	9.02707e-05	E2f2	E2F transcription factor 2 [Source:MGI Symbol;Acc:MGI:1096341]
ENSMUSG00000038253	1241.43	1453.39	1720.4	1242.39	759.412	1013.63	723.332	941.653	859.506	1414.4	0.719356	9.08328e-05	Hoxa5	homeobox A5 [Source:MGI Symbol;Acc:MGI:96177]
ENSMUSG00000052632	458.239	447.699	439.423	526.918	303.579	325.697	244.468	338.407	303.038	468.07	0.62899	9.26343e-05	Asap2	ArfGAP with SH3 domain, ankyrin repeat and PH domain 2 [Source:MGI Symbol;Acc:MGI:2685438]
ENSMUSG00000036693	681.035	767.351	741.778	697.668	394.56	429.043	543.872	529.68	474.289	721.958	0.606718	9.27042e-05	Nop14	NOP14 nucleolar protein [Source:MGI Symbol;Acc:MGI:1922666]
ENSMUSG00000028266	1681.18	1386.09	1418.05	1754.65	933.946	1196.31	1006.26	1062.75	1049.82	1559.99	0.571665	9.32352e-05	Lmo4	LIM domain only 4 [Source:MGI Symbol;Acc:MGI:109360]
ENSMUSG00000026201	816.269	1104.76	1083.44	1177.45	1440.84	1571.07	1683.81	1967.06	1665.69	1045.48	-0.671789	9.32849e-05	Stk16	serine/threonine kinase 16 [Source:MGI Symbol;Acc:MGI:1313271]
ENSMUSG00000024357	713.141	833.711	795.194	864.229	433.552	590.847	537.463	570.424	533.072	801.569	0.589457	9.36996e-05	Sil1	endoplasmic reticulum chaperone SIL1 homolog (S. cerevisiae) [Source:MGI Symbol;Acc:MGI:1932040]
ENSMUSG00000033307	1460.33	1409.46	1469.45	1303.15	967.368	1009.45	814.893	1113.69	976.349	1410.6	0.531856	9.37207e-05	Mif	macrophage migration inhibitory factor (glycosylation-inhibiting factor) [Source:MGI Symbol;Acc:MGI:96982]
ENSMUSG00000032244	352.193	369.188	314.449	372.928	543.1	503.16	524.644	452.718	505.905	352.189	-0.523679	9.39851e-05	Fem1b	feminization 1 homolog b (C. elegans) [Source:MGI Symbol;Acc:MGI:1335087]
ENSMUSG00000047514	1027.39	1035.6	1093.52	1128.21	1347.07	1376.9	1525.41	1658.08	1476.87	1071.18	-0.463131	9.4113e-05	Tspyl1	testis-specific protein, Y-encoded-like 1 [Source:MGI Symbol;Acc:MGI:1298395]
ENSMUSG00000028278	314.249	193.473	400.117	206.367	122.546	105.434	160.232	112.048	125.065	278.552	1.15322	9.44176e-05	Rragd	Ras-related GTP binding D [Source:MGI Symbol;Acc:MGI:1098604]
ENSMUSG00000021699	10488.9	7442.65	8739.07	7217.62	2779.56	6392.84	3088.35	3466.69	3931.86	8472.06	1.10758	9.4633e-05	Pde4d	phosphodiesterase 4D, cAMP specific [Source:MGI Symbol;Acc:MGI:99555]
ENSMUSG00000056749	968.043	928.111	1267.88	581.39	464.188	383.111	543.872	244.468	408.91	936.355	1.19417	9.56356e-05	Nfil3	nuclear factor, interleukin 3, regulated [Source:MGI Symbol;Acc:MGI:109495]
ENSMUSG00000027384	441.7	453.307	442.446	384.451	618.298	611.725	549.366	643.991	605.845	430.476	-0.491578	9.56356e-05	Ndufaf5	NADH:ubiquinone oxidoreductase complex assembly factor 5 [Source:MGI Symbol;Acc:MGI:1916737]
ENSMUSG00000022177	313.276	224.317	249.947	271.315	145.755	188.946	119.029	105.257	139.747	264.714	0.920993	9.6461e-05	Haus4	HAUS augmin-like complex, subunit 4 [Source:MGI Symbol;Acc:MGI:1261794]
ENSMUSG00000040447	353.165	272.919	518.035	413.782	185.675	185.814	211.506	241.072	206.017	389.475	0.919073	9.67267e-05	Spns2	spinster homolog 2 [Source:MGI Symbol;Acc:MGI:2384936]
ENSMUSG00000005533	488.4	830.907	838.532	588.723	381.563	414.428	306.729	390.469	373.297	686.64	0.880015	9.67267e-05	Igf1r	insulin-like growth factor I receptor [Source:MGI Symbol;Acc:MGI:96433]
ENSMUSG00000031827	143.017	126.178	133.036	128.849	616.442	269.326	181.291	328.22	348.82	132.77	-1.39391	9.67267e-05	Cotl1	coactosin-like 1 (Dictyostelium) [Source:MGI Symbol;Acc:MGI:1919292]
ENSMUSG00000028599	965.124	603.786	527.106	480.825	416.841	199.385	145.582	215.041	244.212	644.21	1.39891	9.78103e-05	Tnfrsf1b	tumor necrosis factor receptor superfamily, member 1b [Source:MGI Symbol;Acc:MGI:1314883]
ENSMUSG00000057054	781.245	715.945	687.354	800.328	442.835	588.76	496.261	514.966	510.705	746.218	0.547915	9.78103e-05	Inca1	inhibitor of CDK, cyclin A1 interacting protein 1 [Source:MGI Symbol;Acc:MGI:2144284]
ENSMUSG00000029919	23.3498	14.0198	17.1335	15.7132	93.766	53.2389	37.54	43.0082	56.8883	17.5541	-1.69903	9.78103e-05	Hpgds	hematopoietic prostaglandin D synthase [Source:MGI Symbol;Acc:MGI:1859384]
ENSMUSG00000035325	3136.65	4784.49	3828.82	4447.9	2431.42	2396.79	2045.47	2934.74	2452.11	4049.47	0.723947	9.82158e-05	Sec31a	Sec31 homolog A (S. cerevisiae) [Source:MGI Symbol;Acc:MGI:1916412]
ENSMUSG00000000142	115.776	233.663	231.806	228.366	383.419	368.497	546.619	380.283	419.704	202.403	-1.05305	9.83005e-05	Axin2	axin 2 [Source:MGI Symbol;Acc:MGI:1270862]
ENSMUSG00000035158	309.385	258.899	314.449	293.314	205.171	194.165	132.763	134.684	166.696	294.012	0.817284	9.83317e-05	Mitf	melanogenesis associated transcription factor [Source:MGI Symbol;Acc:MGI:104554]
ENSMUSG00000027605	4602.83	3351.67	2837.1	5648.39	18148.8	15222.1	6131.84	20065.6	14892.1	4110	-1.85734	9.84161e-05	Acss2	acyl-CoA synthetase short-chain family member 2 [Source:MGI Symbol;Acc:MGI:1890410]
ENSMUSG00000021057	2.91872	7.47723	9.07065	1.04755	27.8513	42.7999	26.5527	18.1087	28.8281	5.12854	-2.48264	9.84161e-05	Akap5	A kinase (PRKA) anchor protein 5 [Source:MGI Symbol;Acc:MGI:2685104]
ENSMUSG00000060206	131.343	124.309	233.821	136.181	62.2012	68.8974	89.7298	52.0625	68.2227	156.414	1.19278	9.90716e-05	Zfp462	zinc finger protein 462 [Source:MGI Symbol;Acc:MGI:107690]
ENSMUSG00000031533	932.045	935.588	933.269	902.988	1140.05	1233.89	1168.32	1181.59	1180.96	925.973	-0.350504	9.90716e-05	Mrps31	mitochondrial ribosomal protein S31 [Source:MGI Symbol;Acc:MGI:1913153]
ENSMUSG00000018819	84.643	110.289	141.099	83.804	351.855	250.536	144.666	243.336	247.598	104.959	-1.23789	9.90716e-05	Lsp1	lymphocyte specific 1 [Source:MGI Symbol;Acc:MGI:96832]
ENSMUSG00000030365	1.94582	2.80396	1.00785	2.0951	23.2094	17.7463	9.1561	19.2405	17.3381	1.96318	-3.13232	9.96748e-05	Clec2i	C-type lectin domain family 2, member i [Source:MGI Symbol;Acc:MGI:2136650]
ENSMUSG00000003418	107.993	120.57	101.793	84.8515	52.9174	61.5901	54.9366	36.2174	51.4154	103.802	1.01041	9.98704e-05	St8sia6	ST8 alpha-N-acetyl-neuraminide alpha-2,8-sialyltransferase 6 [Source:MGI Symbol;Acc:MGI:2386797]
ENSMUSG00000097324	66.1577	50.4713	80.628	57.6152	25.9945	25.0536	33.8776	22.6359	26.8904	63.7181	1.23686	0.000100099	Carmn	cardiac mesoderm enhancer-associated non-coding RNA [Source:MGI Symbol;Acc:MGI:4439832]
ENSMUSG00000024614	596.392	559.858	526.098	556.249	985.007	865.393	887.226	671.154	852.195	559.649	-0.607585	0.000100534	Tmx3	thioredoxin-related transmembrane protein 3 [Source:MGI Symbol;Acc:MGI:2442418]
ENSMUSG00000062861	416.404	442.091	459.58	399.116	313.791	282.897	260.033	195.8	263.13	429.298	0.703959	0.000100681	Zfp28	zinc finger protein 28 [Source:MGI Symbol;Acc:MGI:99175]
ENSMUSG00000038286	676.171	761.743	725.652	850.61	1016.57	1033.46	1010.83	1094.45	1038.83	753.544	-0.463189	0.000101542	Bphl	biphenyl hydrolase-like (serine hydrolase, breast epithelial mucin-associated antigen) [Source:MGI Symbol;Acc:MGI:1915271]
ENSMUSG00000035885	23788.6	24109.4	26149.7	23765.8	29088.8	31284.6	33531.5	31628	31383.2	24453.4	-0.359963	0.000102899	Cox8a	cytochrome c oxidase subunit 8A [Source:MGI Symbol;Acc:MGI:105959]
ENSMUSG00000040710	102.155	117.766	95.7458	122.563	231.166	203.56	164.81	166.374	191.477	109.558	-0.806731	0.000102967	St8sia4	ST8 alpha-N-acetyl-neuraminide alpha-2,8-sialyltransferase 4 [Source:MGI Symbol;Acc:MGI:106018]
ENSMUSG00000058729	70.0493	83.1842	106.832	67.0432	177.32	187.902	165.725	117.707	162.163	81.7772	-0.989263	0.000103135	Lin9	lin-9 homolog (C. elegans) [Source:MGI Symbol;Acc:MGI:1919818]
ENSMUSG00000025223	1812.53	1709.48	1708.31	1681.32	1031.43	1230.76	1178.39	1413.61	1213.55	1727.91	0.510662	0.00010398	Ldb1	LIM domain binding 1 [Source:MGI Symbol;Acc:MGI:894762]
ENSMUSG00000022774	636.282	796.325	782.092	819.184	1072.27	982.31	1223.25	1201.97	1119.95	758.471	-0.562441	0.000104432	Ncbp2	nuclear cap binding protein subunit 2 [Source:MGI Symbol;Acc:MGI:1915342]
ENSMUSG00000027864	150.801	161.695	117.918	119.421	319.361	278.721	177.628	284.08	264.948	137.459	-0.944626	0.000105139	Ptgfrn	prostaglandin F2 receptor negative regulator [Source:MGI Symbol;Acc:MGI:1277114]
ENSMUSG00000028412	897.021	773.893	685.338	828.612	1115.91	1194.22	1294.67	1045.78	1162.64	796.216	-0.546563	0.000105474	Slc44a1	solute carrier family 44, member 1 [Source:MGI Symbol;Acc:MGI:2140592]
ENSMUSG00000032565	291.872	330.867	342.669	272.363	212.598	220.263	175.797	182.219	197.719	309.443	0.646607	0.000106507	Nudt16	nudix (nucleoside diphosphate linked moiety X)-type motif 16 [Source:MGI Symbol;Acc:MGI:1922936]
ENSMUSG00000036395	367.759	303.762	199.554	284.934	634.081	573.101	734.319	390.469	582.993	289.002	-1.01297	0.000106639	Glb1l2	galactosidase, beta 1-like 2 [Source:MGI Symbol;Acc:MGI:2388283]
ENSMUSG00000052565	4.86454	0.934654	7.05495	9.42795	88.1957	32.3609	13.7341	32.822	41.7782	5.57052	-2.92088	0.000108092	Hist1h1d	histone cluster 1, H1d [Source:MGI Symbol;Acc:MGI:107502]
ENSMUSG00000039512	790.001	772.959	827.445	712.334	1063.92	1035.55	1220.51	993.715	1078.42	775.685	-0.475919	0.000109825	Uhrf1bp1	UHRF1 (ICBP90) binding protein 1 [Source:MGI Symbol;Acc:MGI:3041238]
ENSMUSG00000015971	1251.16	1244.96	1262.84	1078.98	824.398	877.92	972.378	833.001	876.924	1209.48	0.463644	0.000111154	Actr8	ARP8 actin-related protein 8 [Source:MGI Symbol;Acc:MGI:1860775]
ENSMUSG00000019917	488.4	530.883	478.729	521.68	701.852	696.281	638.18	677.945	678.565	504.923	-0.426091	0.000111872	44449	septin 10 [Source:MGI Symbol;Acc:MGI:1918110]
ENSMUSG00000000149	2161.8	2898.36	2919.74	2185.19	1624.66	1738.09	1610.56	1765.6	1684.73	2541.27	0.593299	0.000112847	Gna12	guanine nucleotide binding protein, alpha 12 [Source:MGI Symbol;Acc:MGI:95767]
ENSMUSG00000031485	2484.81	2357.2	2249.52	2107.67	1594.02	1725.57	1715.85	1851.62	1721.76	2299.8	0.418149	0.000114239	Plpbp	pyridoxal phosphate binding protein [Source:MGI Symbol;Acc:MGI:1891207]
ENSMUSG00000002059	1181.11	1383.29	1237.64	1270.68	1502.11	1942.7	1989.62	1908.21	1835.66	1268.18	-0.533258	0.000114239	Rab34	RAB34, member RAS oncogene family [Source:MGI Symbol;Acc:MGI:104606]
ENSMUSG00000024979	35.9976	30.8436	30.2355	46.0922	83.5538	85.5998	59.5146	80.3574	77.2564	35.7922	-1.11108	0.000114239	Tectb	tectorin beta [Source:MGI Symbol;Acc:MGI:109574]
ENSMUSG00000039958	2255.2	2390.84	2363.41	2888.09	1718.42	1651.45	1563.86	1071.81	1501.39	2474.39	0.720259	0.000114442	Etfbkmt	electron transfer flavoprotein beta subunit lysine methyltransferase [Source:MGI Symbol;Acc:MGI:2443575]
ENSMUSG00000031974	666.442	722.487	753.872	706.049	908.88	960.388	1239.74	1079.73	1047.18	712.212	-0.556295	0.000116406	Abcb10	ATP-binding cassette, sub-family B (MDR/TAP), member 10 [Source:MGI Symbol;Acc:MGI:1860508]
ENSMUSG00000043881	110.911	150.479	108.848	111.04	224.667	188.946	204.181	187.878	201.418	120.32	-0.742825	0.000117657	Kbtbd7	kelch repeat and BTB (POZ) domain containing 7 [Source:MGI Symbol;Acc:MGI:2685141]
ENSMUSG00000023094	560.395	616.871	642.001	648.433	840.18	884.183	770.028	874.877	842.317	616.925	-0.448917	0.000117662	Msrb2	methionine sulfoxide reductase B2 [Source:MGI Symbol;Acc:MGI:1923717]
ENSMUSG00000117050	108.966	168.238	151.178	102.66	48.2756	32.3609	67.7551	12.4497	40.2103	132.76	1.71366	0.000119241	AC167363.2	TEC
ENSMUSG00000033900	40.8621	39.2555	27.212	53.425	88.1957	124.224	94.3078	67.9077	93.6588	40.1886	-1.22322	0.000119667	Map9	microtubule-associated protein 9 [Source:MGI Symbol;Acc:MGI:2442208]
ENSMUSG00000021258	745.247	682.297	785.115	629.577	460.475	517.774	464.214	538.734	495.299	710.559	0.522054	0.000120583	Ccnk	cyclin K [Source:MGI Symbol;Acc:MGI:1276106]
ENSMUSG00000074796	48.6454	55.1446	53.4161	53.425	28.7797	19.8341	20.1434	22.6359	22.8483	52.6578	1.20162	0.000121307	Slc4a11	solute carrier family 4, sodium bicarbonate transporter-like, member 11 [Source:MGI Symbol;Acc:MGI:2138987]
ENSMUSG00000056493	969.989	1005.69	1239.66	1030.79	647.078	625.296	781.015	783.202	709.148	1061.53	0.582054	0.000122326	Foxk1	forkhead box K1 [Source:MGI Symbol;Acc:MGI:1347488]
ENSMUSG00000030629	3645.48	3406.81	3158.6	3989.07	2489.9	2552.34	2784.37	2575.96	2600.64	3549.99	0.448806	0.000122428	Zfand6	zinc finger, AN1-type domain 6 [Source:MGI Symbol;Acc:MGI:1929510]
ENSMUSG00000028751	6.81035	8.41188	5.03925	13.6181	38.0634	29.2292	21.9746	37.3492	31.6541	8.46991	-1.90526	0.000122428	Pla2g2e	phospholipase A2, group IIE [Source:MGI Symbol;Acc:MGI:1349660]
ENSMUSG00000063856	11400.5	10902.7	12422.8	12215.5	9066.52	9730.19	8919.87	8753.3	9117.47	11735.4	0.364121	0.000123501	Gpx1	glutathione peroxidase 1 [Source:MGI Symbol;Acc:MGI:104887]
ENSMUSG00000001785	504.939	415.921	421.281	397.021	315.648	300.643	286.586	286.344	297.305	434.791	0.548271	0.000124116	Pwp1	PWP1 homolog, endonuclein [Source:MGI Symbol;Acc:MGI:1914735]
ENSMUSG00000093930	1856.31	2015.11	1701.25	2295.18	3013.51	2575.3	3564.47	4576.98	3432.56	1966.96	-0.803228	0.000125915	Hmgcs1	3-hydroxy-3-methylglutaryl-Coenzyme A synthase 1 [Source:MGI Symbol;Acc:MGI:107592]
ENSMUSG00000006418	1077.98	1318.8	1293.07	1065.36	847.607	846.603	882.648	793.388	842.561	1188.8	0.496467	0.000126261	Rnf114	ring finger protein 114 [Source:MGI Symbol;Acc:MGI:1933159]
ENSMUSG00000045466	170.259	164.499	203.586	131.991	103.05	87.6876	102.548	78.0938	92.8449	167.584	0.848416	0.000126808	Zfp956	zinc finger protein 956 [Source:MGI Symbol;Acc:MGI:2141515]
ENSMUSG00000001729	2850.62	3335.78	3132.4	3564.81	2065.64	2336.25	2184.65	2557.86	2286.1	3220.9	0.494881	0.000126879	Akt1	thymoma viral proto-oncogene 1 [Source:MGI Symbol;Acc:MGI:87986]
ENSMUSG00000074340	64.2119	57.9485	57.4475	55.5201	25.9945	25.0536	32.0463	26.0313	27.2814	58.782	1.10401	0.00012723	Ovgp1	oviductal glycoprotein 1 [Source:MGI Symbol;Acc:MGI:106661]
ENSMUSG00000029012	514.668	555.184	530.129	509.109	385.276	327.785	415.687	342.934	367.92	527.273	0.517373	0.000128378	Orc5	origin recognition complex, subunit 5 [Source:MGI Symbol;Acc:MGI:1347044]
ENSMUSG00000008496	12.6478	13.0852	13.1021	8.3804	47.3472	28.1853	29.2995	43.0082	36.96	11.8039	-1.64188	0.000130548	Pou2f2	POU domain, class 2, transcription factor 2 [Source:MGI Symbol;Acc:MGI:101897]
ENSMUSG00000031246	2704.68	2176.81	2131.6	2656.59	3383	3711.06	3500.38	3192.79	3446.81	2417.42	-0.511925	0.000131494	Sh3bgrl	SH3-binding domain glutamic acid-rich protein like [Source:MGI Symbol;Acc:MGI:1930849]
ENSMUSG00000074884	1471.04	1537.51	1285.01	1313.63	1852.11	1832.04	2145.27	2415.25	2061.17	1401.79	-0.55575	0.000131766	Serf2	small EDRK-rich factor 2 [Source:MGI Symbol;Acc:MGI:1337041]
ENSMUSG00000052593	704.385	691.644	679.291	692.43	1059.28	946.817	846.024	928.071	945.047	691.938	-0.449795	0.000132706	Adam17	a disintegrin and metallopeptidase domain 17 [Source:MGI Symbol;Acc:MGI:1096335]
ENSMUSG00000042613	3024.77	2814.24	3487.16	2602.11	1818.69	2220.38	1680.14	2145.88	1966.27	2982.07	0.601223	0.000132745	Pbxip1	pre B cell leukemia transcription factor interacting protein 1 [Source:MGI Symbol;Acc:MGI:2441670]
ENSMUSG00000033174	8623.85	9349.34	10046.3	13484.1	14358.3	15784.8	19579.4	20607.7	17582.5	10375.9	-0.760926	0.000133117	Mgll	monoglyceride lipase [Source:MGI Symbol;Acc:MGI:1346042]
ENSMUSG00000040990	1846.58	1847.81	1787.93	2045.86	2390.57	2610.79	2334.81	2760.45	2524.15	1882.05	-0.423226	0.000133714	Sh3kbp1	SH3-domain kinase binding protein 1 [Source:MGI Symbol;Acc:MGI:1889583]
ENSMUSG00000020897	0	1.86931	3.02355	1.04755	25.9945	19.8341	6.40927	20.3723	18.1525	1.4851	-3.61008	0.000135167	Aurkb	aurora kinase B [Source:MGI Symbol;Acc:MGI:107168]
ENSMUSG00000069516	1085.76	911.287	1299.12	980.507	4643.74	2035.6	1485.12	2231.9	2599.09	1069.17	-1.28163	0.000135438	Lyz2	lysozyme 2 [Source:MGI Symbol;Acc:MGI:96897]
ENSMUSG00000004393	686.873	618.741	703.48	675.67	396.417	480.194	513.657	485.54	468.952	671.191	0.517558	0.000136269	Ddx56	DEAD (Asp-Glu-Ala-Asp) box polypeptide 56 [Source:MGI Symbol;Acc:MGI:1277172]
ENSMUSG00000021262	115.776	114.028	120.942	113.135	302.651	175.375	168.472	243.336	222.458	115.97	-0.939897	0.000136689	Evl	Ena-vasodilator stimulated phosphoprotein [Source:MGI Symbol;Acc:MGI:1194884]
ENSMUSG00000004637	380.407	466.392	353.755	471.397	220.025	290.204	245.383	285.212	260.206	417.988	0.685753	0.000137102	Wwox	WW domain-containing oxidoreductase [Source:MGI Symbol;Acc:MGI:1931237]
ENSMUSG00000019861	469.914	496.301	448.493	582.438	719.491	757.871	691.285	680.208	712.214	499.287	-0.512983	0.000137102	Gopc	golgi associated PDZ and coiled-coil motif containing [Source:MGI Symbol;Acc:MGI:2149946]
ENSMUSG00000040029	980.691	837.45	827.445	869.466	1270.95	1263.12	1433.85	1083.13	1262.76	878.763	-0.523653	0.000137427	Ipo8	importin 8 [Source:MGI Symbol;Acc:MGI:2444611]
ENSMUSG00000030031	13.6207	31.7782	22.1727	13.6181	45.4904	57.4145	63.1771	56.5897	55.6679	20.2974	-1.44878	0.000137429	Kbtbd8	kelch repeat and BTB (POZ) domain containing 8 [Source:MGI Symbol;Acc:MGI:2661430]
ENSMUSG00000014503	170.259	164.499	157.225	128.849	226.524	258.887	237.143	239.94	240.624	155.208	-0.63029	0.000137763	Pkd2l2	polycystic kidney disease 2-like 2 [Source:MGI Symbol;Acc:MGI:1858231]
ENSMUSG00000016262	0.972908	8.41188	3.02355	2.0951	31.5648	28.1853	12.8185	24.8995	24.367	3.62586	-2.72886	0.000137763	Sertad4	SERTA domain containing 4 [Source:MGI Symbol;Acc:MGI:2443496]
ENSMUSG00000020964	2586.96	2362.8	2419.85	2460.69	2022.93	1933.3	1892.57	1736.17	1896.24	2457.58	0.373668	0.00013916	Sel1l	sel-1 suppressor of lin-12-like (C. elegans) [Source:MGI Symbol;Acc:MGI:1329016]
ENSMUSG00000064326	410.567	438.353	457.564	406.449	304.507	305.863	276.514	328.22	303.776	428.233	0.49724	0.000139412	Siva1	SIVA1, apoptosis-inducing factor [Source:MGI Symbol;Acc:MGI:1353606]
ENSMUSG00000029056	801.676	965.497	914.12	824.422	670.288	612.769	577.75	654.177	628.746	876.429	0.479719	0.000139792	Pank4	pantothenate kinase 4 [Source:MGI Symbol;Acc:MGI:2387466]
ENSMUSG00000020532	47203.5	34767.2	32884.1	53855.6	81799.2	81090.1	55380.7	86101.3	76092.8	42177.6	-0.851282	0.000139792	Acaca	acetyl-Coenzyme A carboxylase alpha [Source:MGI Symbol;Acc:MGI:108451]
ENSMUSG00000090486	15.5665	5.60792	3.02355	14.6657	39.9202	37.5804	28.3839	73.5666	44.8628	9.71592	-2.20646	0.000140148	BC035947	cDNA sequence BC035947 [Source:MGI Symbol;Acc:MGI:2652858]
ENSMUSG00000026615	4188.37	3760.11	3483.13	3531.29	2682.08	2887.43	2787.12	2278.3	2658.73	3740.73	0.492414	0.000140449	Eprs	glutamyl-prolyl-tRNA synthetase [Source:MGI Symbol;Acc:MGI:97838]
ENSMUSG00000058886	443.646	625.283	600.679	567.772	361.138	383.111	385.472	325.957	363.92	559.345	0.619353	0.000141139	Deaf1	DEAF1, transcription factor [Source:MGI Symbol;Acc:MGI:1858496]
ENSMUSG00000038895	394.028	343.018	355.771	318.455	199.601	254.712	233.481	247.863	233.914	352.818	0.595179	0.000141458	Zfp653	zinc finger protein 653 [Source:MGI Symbol;Acc:MGI:2442362]
ENSMUSG00000024431	1443.79	1034.66	1167.09	1053.84	2085.13	1900.94	2324.73	1486.05	1949.21	1174.85	-0.730758	0.000142783	Nr3c1	nuclear receptor subfamily 3, group C, member 1 [Source:MGI Symbol;Acc:MGI:95824]
ENSMUSG00000017756	3090.93	4088.18	4202.74	3769.08	2363.65	2611.84	1714.94	2594.07	2321.12	3787.73	0.706768	0.000143601	Slc12a7	solute carrier family 12, member 7 [Source:MGI Symbol;Acc:MGI:1342283]
ENSMUSG00000052253	634.336	576.681	639.985	570.915	449.334	424.867	444.986	467.431	446.655	605.479	0.439246	0.000143601	Zfp622	zinc finger protein 622 [Source:MGI Symbol;Acc:MGI:1289282]
ENSMUSG00000037759	142.045	96.2693	121.95	107.898	76.1268	41.756	43.0337	58.8533	54.9425	117.04	1.08976	0.000144445	Ptger2	prostaglandin E receptor 2 (subtype EP2) [Source:MGI Symbol;Acc:MGI:97794]
ENSMUSG00000045896	1064.36	944.935	1194.3	986.792	688.855	692.106	813.062	578.347	693.092	1047.6	0.594837	0.000144731	Paip2b	poly(A) binding protein interacting protein 2B [Source:MGI Symbol;Acc:MGI:2386865]
ENSMUSG00000036334	16.5394	14.0198	12.0942	4.1902	69.6282	42.7999	23.8059	50.9307	46.7912	11.7109	-1.99054	0.000144847	Igsf10	immunoglobulin superfamily, member 10 [Source:MGI Symbol;Acc:MGI:1923481]
ENSMUSG00000033685	2374.87	2588.06	2778.64	2892.28	2099.99	1525.14	1124.37	1410.22	1539.93	2658.46	0.787579	0.000147289	Ucp2	uncoupling protein 2 (mitochondrial, proton carrier) [Source:MGI Symbol;Acc:MGI:109354]
ENSMUSG00000074578	585.69	529.949	537.184	386.546	276.656	301.687	370.822	270.499	304.916	509.842	0.740977	0.000147685	Zfas1	zinc finger, NFX1-type containing 1, antisense RNA 1 [Source:MGI Symbol;Acc:MGI:1916199]
ENSMUSG00000032803	4378.08	3544.21	3871.15	3253.69	2377.57	2715.18	2803.6	2609.92	2626.57	3761.78	0.518305	0.000149412	Cdv3	carnitine deficiency-associated gene expressed in ventricle 3 [Source:MGI Symbol;Acc:MGI:2448759]
ENSMUSG00000022098	255.875	314.044	289.253	267.125	580.235	493.765	345.185	483.276	475.615	281.574	-0.755656	0.000149412	Bmp1	bone morphogenetic protein 1 [Source:MGI Symbol;Acc:MGI:88176]
ENSMUSG00000023032	421.269	405.64	465.627	380.261	241.378	305.863	280.177	191.273	254.673	418.199	0.714088	0.000149887	Slc4a8	solute carrier family 4 (anion exchanger), member 8 [Source:MGI Symbol;Acc:MGI:1928745]
ENSMUSG00000032640	84.643	77.5763	70.5495	79.6138	157.824	131.531	109.873	165.242	141.118	78.0956	-0.851139	0.000149975	Chsy1	chondroitin sulfate synthase 1 [Source:MGI Symbol;Acc:MGI:2681120]
ENSMUSG00000076617	71.0223	40.1901	64.5024	50.2824	191.245	165.98	76.9112	132.42	141.639	56.4993	-1.32607	0.000149975	Ighm	immunoglobulin heavy constant mu [Source:MGI Symbol;Acc:MGI:96448]
ENSMUSG00000033021	1005.99	1387.03	1252.76	1251.82	798.403	822.593	762.703	931.467	828.792	1224.4	0.563722	0.000150067	Gmppa	GDP-mannose pyrophosphorylase A [Source:MGI Symbol;Acc:MGI:1916330]
ENSMUSG00000064369	770.543	457.98	316.465	362.452	1065.78	874.788	1198.53	945.048	1021.04	476.86	-1.09825	0.000150248	mt-Te	mitochondrially encoded tRNA glutamic acid [Source:MGI Symbol;Acc:MGI:102488]
ENSMUSG00000020307	1522.6	1573.96	1836.3	1826.93	2146.41	2336.25	2484.97	2821.56	2447.3	1689.95	-0.534118	0.00015027	Cdc34	cell division cycle 34 [Source:MGI Symbol;Acc:MGI:102657]
ENSMUSG00000035227	1173.33	1312.25	1316.25	1430.95	1016.57	1001.1	947.656	920.149	971.369	1308.2	0.429004	0.000150673	Spcs2	signal peptidase complex subunit 2 homolog (S. cerevisiae) [Source:MGI Symbol;Acc:MGI:1913874]
ENSMUSG00000007038	969.989	991.668	953.427	1022.41	679.571	734.906	652.83	813.76	720.267	984.373	0.452049	0.000151334	Neu1	neuraminidase 1 [Source:MGI Symbol;Acc:MGI:97305]
ENSMUSG00000027217	1960.41	2624.51	2421.86	3082.94	3616.02	4729.91	3803.44	6304.09	4613.37	2522.43	-0.870894	0.000151334	Tspan18	tetraspanin 18 [Source:MGI Symbol;Acc:MGI:1917186]
ENSMUSG00000027936	1505.09	1428.15	1516.81	1538.85	920.021	1095.05	1088.66	1216.68	1080.1	1497.23	0.47183	0.000153125	Crtc2	CREB regulated transcription coactivator 2 [Source:MGI Symbol;Acc:MGI:1921593]
ENSMUSG00000031921	504.939	559.858	570.443	588.723	404.772	419.648	415.687	371.229	402.834	555.991	0.463657	0.000153834	Terf2	telomeric repeat binding factor 2 [Source:MGI Symbol;Acc:MGI:1195972]
ENSMUSG00000058793	2865.21	3279.7	3387.39	3349.02	2310.73	2280.92	2089.42	2632.55	2328.41	3220.33	0.468179	0.000154198	Cds2	CDP-diacylglycerol synthase (phosphatidate cytidylyltransferase) 2 [Source:MGI Symbol;Acc:MGI:1332236]
ENSMUSG00000000753	350.247	359.842	320.496	226.271	649.863	671.228	418.434	546.657	571.545	314.214	-0.862092	0.000154246	Serpinf1	serine (or cysteine) peptidase inhibitor, clade F, member 1 [Source:MGI Symbol;Acc:MGI:108080]
ENSMUSG00000025066	1295.91	1248.7	1310.21	1243.44	917.236	1011.54	866.167	1034.46	957.35	1274.56	0.413924	0.000154516	Sfr1	SWI5 dependent recombination repair 1 [Source:MGI Symbol;Acc:MGI:1915038]
ENSMUSG00000027649	841.565	783.24	689.37	753.188	509.678	479.15	550.282	604.378	535.872	766.841	0.517884	0.000155021	Ctnnbl1	catenin, beta like 1 [Source:MGI Symbol;Acc:MGI:1913892]
ENSMUSG00000017561	641.146	494.432	530.129	477.683	375.992	382.067	325.957	297.662	345.42	535.847	0.63291	0.000156812	Crlf3	cytokine receptor-like factor 3 [Source:MGI Symbol;Acc:MGI:1860086]
ENSMUSG00000021716	430.025	498.17	412.211	525.87	663.789	637.823	650.999	716.426	667.259	466.569	-0.515894	0.000156874	Srek1ip1	splicing regulatory glutamine/lysine-rich protein 1interacting protein 1 [Source:MGI Symbol;Acc:MGI:1914538]
ENSMUSG00000090862	3915.95	3691.88	4271.27	3572.14	2925.31	2910.39	3096.59	2728.76	2915.26	3862.81	0.405821	0.000156919	Rps13	ribosomal protein S13 [Source:MGI Symbol;Acc:MGI:1915302]
ENSMUSG00000027381	213.067	248.618	324.528	229.413	179.177	134.663	113.536	107.52	133.724	253.906	0.922714	0.000157049	Bcl2l11	BCL2-like 11 (apoptosis facilitator) [Source:MGI Symbol;Acc:MGI:1197519]
ENSMUSG00000036438	1733.72	1372.07	1488.6	1454	2234.6	2076.32	2083.93	1933.1	2081.99	1512.1	-0.461656	0.000157231	Calm2	calmodulin 2 [Source:MGI Symbol;Acc:MGI:103250]
ENSMUSG00000079020	657.686	860.816	947.379	831.755	573.736	557.443	400.122	372.36	475.915	824.409	0.792072	0.000157457	Slc45a4	solute carrier family 45, member 4 [Source:MGI Symbol;Acc:MGI:2146236]
ENSMUSG00000041362	1159.71	1044.94	906.058	1152.3	695.354	768.31	491.682	690.395	661.435	1065.75	0.688874	0.000157496	Shtn1	shootin 1 [Source:MGI Symbol;Acc:MGI:1918903]
ENSMUSG00000048865	64.2119	73.8376	75.5888	60.7579	311.006	153.453	97.0546	158.451	179.991	68.5991	-1.39202	0.000157496	Arhgap30	Rho GTPase activating protein 30 [Source:MGI Symbol;Acc:MGI:2684948]
ENSMUSG00000030745	2.91872	4.67327	9.07065	4.1902	25.0662	33.4048	14.6498	27.1631	25.0709	5.21321	-2.26423	0.000157624	Il21r	interleukin 21 receptor [Source:MGI Symbol;Acc:MGI:1890475]
ENSMUSG00000002409	693.683	723.422	765.966	845.373	940.445	1125.32	1093.24	1280.06	1109.77	757.111	-0.551303	0.000158933	Dyrk1b	dual-specificity tyrosine-(Y)-phosphorylation regulated kinase 1b [Source:MGI Symbol;Acc:MGI:1330302]
ENSMUSG00000076928	2.91872	4.67327	3.02355	4.1902	21.3527	24.0097	10.9873	26.0313	20.5952	3.70144	-2.46747	0.000158933	Trac	T cell receptor alpha constant [Source:MGI Symbol;Acc:MGI:4439838]
ENSMUSG00000053460	293.818	432.745	347.708	397.021	567.238	522.994	563.1	619.092	568.106	367.823	-0.626713	0.000160436	Ggcx	gamma-glutamyl carboxylase [Source:MGI Symbol;Acc:MGI:1927655]
ENSMUSG00000059866	498.129	494.432	466.635	393.879	319.361	292.292	335.113	237.677	296.111	463.268	0.643804	0.000160722	Tnip2	TNFAIP3 interacting protein 2 [Source:MGI Symbol;Acc:MGI:2386643]
ENSMUSG00000025089	117.722	89.7268	152.185	145.609	51.0607	76.2047	32.0463	23.7677	45.7699	126.311	1.46261	0.000161388	Gfra1	glial cell line derived neurotrophic factor family receptor alpha 1 [Source:MGI Symbol;Acc:MGI:1100842]
ENSMUSG00000024691	39.8892	55.1446	51.4004	41.902	216.312	87.6876	78.7424	127.893	127.659	47.084	-1.43907	0.000161744	Fam111a	family with sequence similarity 111, member A [Source:MGI Symbol;Acc:MGI:1915508]
ENSMUSG00000021418	266.577	196.277	185.444	180.179	106.763	99.1705	139.173	118.838	115.986	207.119	0.835881	0.00016311	Rpp40	ribonuclease P 40 subunit [Source:MGI Symbol;Acc:MGI:1346084]
ENSMUSG00000004500	69.0764	120.57	73.5731	83.804	191.245	127.356	192.278	183.351	173.558	86.756	-0.999502	0.000163406	Zfp324	zinc finger protein 324 [Source:MGI Symbol;Acc:MGI:2444641]
ENSMUSG00000031722	15974.2	9606.37	10688.3	17289.8	42912.3	20695.3	28383	22637	28656.9	13389.7	-1.09779	0.000167549	Hp	haptoglobin [Source:MGI Symbol;Acc:MGI:96211]
ENSMUSG00000004655	4876.21	5742.51	6765.7	5406.4	8285.76	9088.19	7399.04	10546.1	8829.76	5697.71	-0.63191	0.000168838	Aqp1	aquaporin 1 [Source:MGI Symbol;Acc:MGI:103201]
ENSMUSG00000061436	819.188	396.293	491.831	536.345	1026.78	1203.62	1216.85	861.295	1077.14	560.914	-0.941615	0.000170044	Hipk2	homeodomain interacting protein kinase 2 [Source:MGI Symbol;Acc:MGI:1314872]
ENSMUSG00000043962	4304.14	4004.06	4274.29	4173.44	3121.2	3166.15	3481.15	3449.71	3304.55	4188.98	0.342176	0.000170661	Thrap3	thyroid hormone receptor associated protein 3 [Source:MGI Symbol;Acc:MGI:2442637]
ENSMUSG00000049265	23540.5	23657	24107.8	25034.3	14560.7	16113.6	14202	20439.1	16328.8	24084.9	0.560773	0.000171981	Kcnk3	potassium channel, subfamily K, member 3 [Source:MGI Symbol;Acc:MGI:1100509]
ENSMUSG00000028364	47.6725	35.5168	35.2748	35.6167	186.604	98.1266	58.599	91.6753	108.751	38.5202	-1.49808	0.000173664	Tnc	tenascin C [Source:MGI Symbol;Acc:MGI:101922]
ENSMUSG00000029093	2824.35	2215.13	2112.45	2969.8	1055.56	1053.3	566.763	1767.86	1110.87	2530.43	1.18821	0.000174619	Sorcs2	sortilin-related VPS10 domain containing receptor 2 [Source:MGI Symbol;Acc:MGI:1932289]
ENSMUSG00000001227	733.572	816.887	805.272	732.237	538.458	425.911	611.627	496.858	518.214	771.992	0.573898	0.000174881	Sema6b	sema domain, transmembrane domain (TM), and cytoplasmic domain, (semaphorin) 6B [Source:MGI Symbol;Acc:MGI:1202889]
ENSMUSG00000027001	97.2908	88.7921	98.7693	119.421	191.245	169.112	146.498	167.506	168.59	101.068	-0.740198	0.000174881	Dusp19	dual specificity phosphatase 19 [Source:MGI Symbol;Acc:MGI:1915332]
ENSMUSG00000055932	1475.9	1779.58	1709.31	1768.26	1101.05	1102.36	1076.76	1387.58	1166.94	1683.26	0.529209	0.000175128	Fto	fat mass and obesity associated [Source:MGI Symbol;Acc:MGI:1347093]
ENSMUSG00000030747	23782.7	29388.3	31335.1	19343	33643.4	55245.3	46973.5	47009.1	45717.8	25962.3	-0.816326	0.000175396	Dgat2	diacylglycerol O-acyltransferase 2 [Source:MGI Symbol;Acc:MGI:1915050]
ENSMUSG00000019732	332.734	336.475	276.151	270.268	207.956	177.463	207.843	203.723	199.246	303.907	0.609294	0.000176913	Calr3	calreticulin 3 [Source:MGI Symbol;Acc:MGI:1920566]
ENSMUSG00000030605	4784.76	4763.93	3965.89	7252.19	3556.61	2276.75	2093.08	2920.03	2711.62	5191.69	0.937013	0.000179032	Mfge8	milk fat globule-EGF factor 8 protein [Source:MGI Symbol;Acc:MGI:102768]
ENSMUSG00000036966	462.131	510.321	538.192	518.537	346.284	381.023	311.307	383.678	355.573	507.295	0.514367	0.000180139	Spryd3	SPRY domain containing 3 [Source:MGI Symbol;Acc:MGI:2446175]
ENSMUSG00000034320	560.395	428.071	409.187	392.831	628.511	883.139	687.623	702.844	725.529	447.621	-0.696026	0.000180812	Slc26a2	solute carrier family 26 (sulfate transporter), member 2 [Source:MGI Symbol;Acc:MGI:892977]
ENSMUSG00000039126	90.4804	56.0792	39.3062	55.5201	236.736	162.848	80.5737	189.01	167.292	60.3465	-1.46962	0.000183659	Prune2	prune homolog 2 [Source:MGI Symbol;Acc:MGI:1925004]
ENSMUSG00000050241	0	0	0	0	10.2121	10.439	9.1561	3.39538	8.30065	0	-5.51687	0.000184465	Klre1	killer cell lectin-like receptor family E member 1 [Source:MGI Symbol;Acc:MGI:2662547]
ENSMUSG00000045319	103.128	199.081	241.884	145.609	48.2756	99.1705	63.1771	70.1712	70.1986	172.426	1.29933	0.000185884	Proser2	proline and serine rich 2 [Source:MGI Symbol;Acc:MGI:2442238]
ENSMUSG00000049422	14612.1	15515.3	12406.6	15980.4	10067.3	9960.89	9426.2	11743.5	10299.5	14628.6	0.506289	0.000189038	Chchd10	coiled-coil-helix-coiled-coil-helix domain containing 10 [Source:MGI Symbol;Acc:MGI:2143558]
ENSMUSG00000032376	657.686	605.656	598.663	551.011	444.692	433.218	458.721	375.756	428.097	603.254	0.493587	0.000189251	Usp3	ubiquitin specific peptidase 3 [Source:MGI Symbol;Acc:MGI:2152450]
ENSMUSG00000034621	999.176	1175.79	1301.13	1121.93	759.412	788.144	846.024	873.745	816.831	1149.51	0.493189	0.000189568	Gpatch8	G patch domain containing 8 [Source:MGI Symbol;Acc:MGI:1918667]
ENSMUSG00000030515	1152.9	1042.14	1091.5	757.378	614.585	716.115	648.252	522.889	625.46	1010.98	0.692622	0.000191799	Tarsl2	threonyl-tRNA synthetase-like 2 [Source:MGI Symbol;Acc:MGI:2444486]
ENSMUSG00000032220	212.094	334.606	333.598	219.985	105.835	113.785	96.139	193.537	127.324	275.071	1.11574	0.000194061	Myo1e	myosin IE [Source:MGI Symbol;Acc:MGI:106621]
ENSMUSG00000060708	316.195	345.822	330.575	299.599	419.626	440.526	556.691	582.874	499.929	323.048	-0.628923	0.000194109	Bloc1s4	biogenesis of lysosomal organelles complex-1, subunit 4, cappuccino [Source:MGI Symbol;Acc:MGI:1929230]
ENSMUSG00000033207	69.0764	99.0733	133.036	115.23	38.0634	59.5023	32.962	50.9307	45.3646	104.104	1.20376	0.000196292	Mamdc2	MAM domain containing 2 [Source:MGI Symbol;Acc:MGI:1918988]
ENSMUSG00000060002	26500.1	25389.9	29321.4	27499.2	34880.9	35753.6	42033.8	34117.9	36696.6	27177.6	-0.433253	0.000198108	Chpt1	choline phosphotransferase 1 [Source:MGI Symbol;Acc:MGI:2384841]
ENSMUSG00000017188	1151.92	1129.06	1045.14	1284.3	1485.4	1610.74	1523.57	1844.82	1616.13	1152.61	-0.487268	0.000198108	Coa3	cytochrome C oxidase assembly factor 3 [Source:MGI Symbol;Acc:MGI:1098757]
ENSMUSG00000019864	922.316	1017.84	1090.49	1384.86	1535.53	1621.18	1760.72	1882.17	1699.9	1103.88	-0.623048	0.000198108	Rtn4ip1	reticulon 4 interacting protein 1 [Source:MGI Symbol;Acc:MGI:2178759]
ENSMUSG00000102644	164.421	134.59	119.934	180.179	232.094	247.404	250.877	237.677	242.013	149.781	-0.69343	0.000198108	Thap6	THAP domain containing 6 [Source:MGI Symbol;Acc:MGI:1922436]
ENSMUSG00000027999	2434.21	2253.45	2796.78	3061.99	1573.6	1916.6	1911.79	1783.71	1796.42	2636.61	0.553453	0.000200648	Pla2g12a	phospholipase A2, group XIIA [Source:MGI Symbol;Acc:MGI:1913600]
ENSMUSG00000026917	943.72	1130.93	1001.8	921.844	744.558	700.457	760.872	733.403	734.822	999.575	0.44401	0.000201028	Wdr5	WD repeat domain 5 [Source:MGI Symbol;Acc:MGI:2155884]
ENSMUSG00000014959	1702.59	2106.71	1912.9	2212.43	1316.44	1301.74	1295.59	1586.78	1375.14	1983.66	0.528987	0.000201603	Gorasp2	golgi reassembly stacking protein 2 [Source:MGI Symbol;Acc:MGI:2135962]
ENSMUSG00000028884	303.547	193.473	246.923	282.838	169.893	136.751	144.666	152.792	151.026	256.696	0.763889	0.000201728	Rpa2	replication protein A2 [Source:MGI Symbol;Acc:MGI:1339939]
ENSMUSG00000027680	2276.6	1891.74	2398.68	2186.24	1626.51	1368.55	1706.7	1428.32	1532.52	2188.32	0.513338	0.000203128	Fxr1	fragile X mental retardation gene 1, autosomal homolog [Source:MGI Symbol;Acc:MGI:104860]
ENSMUSG00000031955	194.582	189.735	221.727	223.128	276.656	361.189	362.582	565.897	391.581	207.293	-0.916299	0.000205077	Bcar1	breast cancer anti-estrogen resistance 1 [Source:MGI Symbol;Acc:MGI:108091]
ENSMUSG00000061882	375.542	330.867	339.646	304.837	203.314	252.624	237.143	189.01	220.523	337.723	0.614246	0.000208825	Ccdc62	coiled-coil domain containing 62 [Source:MGI Symbol;Acc:MGI:2684996]
ENSMUSG00000045322	5.83745	6.54258	7.05495	6.2853	68.6998	19.8341	16.481	29.4267	33.6104	6.43007	-2.38916	0.000212132	Tlr9	toll-like receptor 9 [Source:MGI Symbol;Acc:MGI:1932389]
ENSMUSG00000024238	681.035	742.115	710.535	729.095	1111.27	1124.28	916.525	891.854	1010.98	715.695	-0.498599	0.000212271	Zeb1	zinc finger E-box binding homeobox 1 [Source:MGI Symbol;Acc:MGI:1344313]
ENSMUSG00000042354	1178.19	892.594	900.01	876.799	505.037	568.925	745.306	580.611	599.97	961.899	0.680707	0.000212284	Gnl3	guanine nucleotide binding protein-like 3 (nucleolar) [Source:MGI Symbol;Acc:MGI:1353651]
ENSMUSG00000015094	472.833	530.883	543.231	563.582	758.483	691.062	676.636	779.806	726.497	527.632	-0.461315	0.000212797	Npdc1	neural proliferation, differentiation and control 1 [Source:MGI Symbol;Acc:MGI:1099802]
ENSMUSG00000063564	177.069	175.715	204.594	162.37	92.8376	128.4	114.451	86.0164	105.426	179.937	0.770056	0.000213387	Col23a1	collagen, type XXIII, alpha 1 [Source:MGI Symbol;Acc:MGI:2653243]
ENSMUSG00000034641	23.3498	27.105	10.0785	21.9985	118.832	62.634	48.5273	45.2718	68.8163	20.6329	-1.73809	0.000213419	Cd300ld	CD300 molecule like family member d [Source:MGI Symbol;Acc:MGI:2442358]
ENSMUSG00000029162	659.631	561.727	567.42	568.82	402.915	471.843	387.303	402.919	416.245	589.399	0.502551	0.000213819	Khk	ketohexokinase [Source:MGI Symbol;Acc:MGI:1096353]
ENSMUSG00000066892	515.641	565.466	497.878	404.354	318.433	333.004	361.666	304.453	329.389	495.835	0.589955	0.000216059	Fbxl12	F-box and leucine-rich repeat protein 12 [Source:MGI Symbol;Acc:MGI:1354738]
ENSMUSG00000004849	1150.95	1108.5	1124.76	1377.53	1589.38	1549.15	1637.11	1768.99	1636.16	1190.43	-0.458954	0.000216753	Ap1s1	adaptor protein complex AP-1, sigma 1 [Source:MGI Symbol;Acc:MGI:1098244]
ENSMUSG00000015749	1093.55	1073.92	1127.78	1262.3	1567.1	1503.22	1703.95	1411.35	1546.4	1139.39	-0.441476	0.000219478	Anp32e	acidic (leucine-rich) nuclear phosphoprotein 32 family, member E [Source:MGI Symbol;Acc:MGI:1913721]
ENSMUSG00000038663	163.448	54.2099	196.531	77.5187	295.224	341.355	402.868	295.398	333.711	122.927	-1.44143	0.000219648	Fsd2	fibronectin type III and SPRY domain containing 2 [Source:MGI Symbol;Acc:MGI:2444310]
ENSMUSG00000002565	44.7537	30.8436	26.2041	9.42795	6.49863	5.2195	2.74683	5.65897	5.03098	27.8073	2.47587	0.000220783	Scin	scinderin [Source:MGI Symbol;Acc:MGI:1306794]
ENSMUSG00000020277	10018	9702.64	8459.9	13167.7	16392.3	16117.8	14567.4	22445.7	17380.8	10337.1	-0.749651	0.000221664	Pfkl	phosphofructokinase, liver, B-type [Source:MGI Symbol;Acc:MGI:97547]
ENSMUSG00000001507	357.057	482.281	446.478	514.347	279.441	257.843	231.649	333.879	275.703	450.041	0.708501	0.000224659	Itga3	integrin alpha 3 [Source:MGI Symbol;Acc:MGI:96602]
ENSMUSG00000036816	15.5665	16.8238	20.157	17.8083	4.64188	3.1317	1.83122	3.39538	3.25005	17.5889	2.438	0.000224901	Atoh7	atonal bHLH transcription factor 7 [Source:MGI Symbol;Acc:MGI:1355553]
ENSMUSG00000039661	96.3178	61.6871	264.057	75.4236	27.8513	34.4487	34.7932	43.0082	35.0253	124.371	1.83012	0.000225518	Dusp26	dual specificity phosphatase 26 (putative) [Source:MGI Symbol;Acc:MGI:1914209]
ENSMUSG00000020257	735.518	718.749	592.616	746.903	946.015	990.661	949.487	940.521	956.671	698.446	-0.453786	0.000225518	Wdr82	WD repeat domain containing 82 [Source:MGI Symbol;Acc:MGI:1924555]
ENSMUSG00000040972	111.884	157.956	143.115	210.558	282.226	308.994	244.468	485.54	330.307	155.878	-1.08255	0.000226078	Igsf21	immunoglobulin superfamily, member 21 [Source:MGI Symbol;Acc:MGI:2681842]
ENSMUSG00000055128	658.658	597.244	696.425	713.381	828.111	986.485	896.382	985.793	924.193	666.427	-0.471502	0.000227064	Cgrrf1	cell growth regulator with ring finger domain 1 [Source:MGI Symbol;Acc:MGI:1916368]
ENSMUSG00000052229	254.902	312.174	313.441	290.171	216.312	186.858	198.687	176.56	194.604	292.672	0.586504	0.000227093	Gpr17	G protein-coupled receptor 17 [Source:MGI Symbol;Acc:MGI:3584514]
ENSMUSG00000042557	1084.79	1158.04	1101.58	1039.17	868.96	796.496	817.64	660.968	786.016	1095.89	0.478474	0.0002282	Sin3a	transcriptional regulator, SIN3A (yeast) [Source:MGI Symbol;Acc:MGI:107157]
ENSMUSG00000031070	5.83745	13.0852	8.0628	11.523	40.8485	28.1853	23.8059	36.2174	32.2643	9.62711	-1.74249	0.000228943	Mrgprf	MAS-related GPR, member F [Source:MGI Symbol;Acc:MGI:2384823]
ENSMUSG00000042535	1050.74	1122.52	1113.67	1256.01	770.552	753.696	766.365	941.653	808.067	1135.74	0.491798	0.000231035	Gtpbp1	GTP binding protein 1 [Source:MGI Symbol;Acc:MGI:109443]
ENSMUSG00000027820	3010.18	2216.06	1984.46	2356.99	3815.63	4492.95	4752.93	3029.81	4022.83	2391.92	-0.750137	0.000231821	Mme	membrane metallo endopeptidase [Source:MGI Symbol;Acc:MGI:97004]
ENSMUSG00000029321	196.527	311.24	250.955	231.508	145.755	93.951	116.282	41.8764	99.4662	247.558	1.31088	0.000232282	Slc10a6	solute carrier family 10 (sodium/bile acid cotransporter family), member 6 [Source:MGI Symbol;Acc:MGI:1923000]
ENSMUSG00000035351	200.419	209.362	192.499	199.034	142.042	143.014	117.198	119.97	130.556	200.329	0.617577	0.000232282	Nup37	nucleoporin 37 [Source:MGI Symbol;Acc:MGI:1919964]
ENSMUSG00000034826	1133.44	1068.31	908.073	848.515	571.88	651.394	718.754	709.635	662.916	989.584	0.578682	0.000233589	Nup54	nucleoporin 54 [Source:MGI Symbol;Acc:MGI:1920460]
ENSMUSG00000021339	1461.31	1710.42	1608.53	1699.13	2085.13	2172.36	2293.6	2004.41	2138.87	1619.84	-0.401266	0.000234677	Mrs2	MRS2 magnesium transporter [Source:MGI Symbol;Acc:MGI:2685748]
ENSMUSG00000053897	152.746	142.067	126.989	117.326	76.1268	83.512	84.2361	53.1943	74.2673	134.782	0.855764	0.000235789	Slc39a8	solute carrier family 39 (metal ion transporter), member 8 [Source:MGI Symbol;Acc:MGI:1914797]
ENSMUSG00000060036	8457.49	7729.59	7918.68	7924.71	5875.69	6651.73	6579.57	5843.45	6237.61	8007.62	0.360329	0.000235946	Rpl3	ribosomal protein L3 [Source:MGI Symbol;Acc:MGI:1351605]
ENSMUSG00000044066	1288.13	1132.8	1188.26	1103.07	809.544	925.939	812.146	930.335	869.491	1178.06	0.439168	0.000238371	Cep68	centrosomal protein 68 [Source:MGI Symbol;Acc:MGI:2667663]
ENSMUSG00000052305	307.439	714.075	755.888	277.601	2050.78	2127.47	1064.85	2240.95	1871.01	513.751	-1.86449	0.000238659	Hbb-bs	hemoglobin, beta adult s chain [Source:MGI Symbol;Acc:MGI:5474852]
ENSMUSG00000022102	64.2119	86.9228	61.4789	74.376	286.868	144.058	123.607	129.025	170.89	71.7474	-1.25317	0.000240586	Dok2	docking protein 2 [Source:MGI Symbol;Acc:MGI:1332623]
ENSMUSG00000030357	2047.97	2025.39	2288.83	2028.06	3149.05	2974.07	2446.51	2995.86	2891.37	2097.56	-0.462933	0.000245461	Fkbp4	FK506 binding protein 4 [Source:MGI Symbol;Acc:MGI:95543]
ENSMUSG00000078532	13.6207	11.2158	14.1099	8.3804	24.1378	38.6243	68.6707	33.9538	41.3467	11.8317	-1.80639	0.000247901	Nkain1	Na+/K+ transporting ATPase interacting 1 [Source:MGI Symbol;Acc:MGI:1914399]
ENSMUSG00000039656	2128.72	2223.54	2358.37	2123.38	1562.46	1552.28	1709.44	1845.96	1667.53	2208.5	0.405695	0.000251302	Rxrb	retinoid X receptor beta [Source:MGI Symbol;Acc:MGI:98215]
ENSMUSG00000040907	83.6701	44.8634	46.3611	77.5187	240.449	129.444	92.4766	207.118	167.372	63.1033	-1.40766	0.000251369	Atp1a3	ATPase, Na+/K+ transporting, alpha 3 polypeptide [Source:MGI Symbol;Acc:MGI:88107]
ENSMUSG00000027184	4302.2	4285.39	4018.3	4691.98	5457.92	5268.56	5761.02	5526.55	5503.51	4324.46	-0.347933	0.000255121	Caprin1	cell cycle associated protein 1 [Source:MGI Symbol;Acc:MGI:1858234]
ENSMUSG00000030805	1060.47	1215.98	1093.52	1161.73	1345.22	1584.64	1610.56	1749.75	1572.54	1132.93	-0.472532	0.000255356	Stx4a	syntaxin 4A (placental) [Source:MGI Symbol;Acc:MGI:893577]
ENSMUSG00000042759	119.668	128.982	136.06	109.993	195.887	192.078	207.843	172.033	191.96	123.676	-0.635478	0.000255356	Apobr	apolipoprotein B receptor [Source:MGI Symbol;Acc:MGI:2176230]
ENSMUSG00000042804	85.6159	97.204	88.6908	86.9466	167.108	182.682	113.536	220.7	171.006	89.6143	-0.928299	0.000255356	Gpr153	G protein-coupled receptor 153 [Source:MGI Symbol;Acc:MGI:1916157]
ENSMUSG00000057719	30.1601	4.67327	111.871	20.951	4.64188	1.0439	3.66244	5.65897	3.7518	41.9139	3.48306	0.000255904	Sh3rf2	SH3 domain containing ring finger 2 [Source:MGI Symbol;Acc:MGI:2444628]
ENSMUSG00000022687	120.641	124.309	124.973	144.562	74.2701	73.073	64.0927	90.5435	75.4948	128.621	0.773029	0.000257244	Boc	biregional cell adhesion molecule-related/down-regulated by oncogenes (Cdon) binding protein [Source:MGI Symbol;Acc:MGI:2151153]
ENSMUSG00000015575	4428.68	4238.65	4381.13	4247.81	3050.64	3001.21	3755.83	3029.81	3209.38	4324.07	0.429859	0.000257244	Atp6v0e	ATPase, H+ transporting, lysosomal V0 subunit E [Source:MGI Symbol;Acc:MGI:1328318]
ENSMUSG00000030842	1454.5	1528.16	1809.09	1836.35	2220.68	2205.76	2985.8	2552.2	2491.11	1657.03	-0.588444	0.000258389	Lamtor1	late endosomal/lysosomal adaptor, MAPK and MTOR activator 1 [Source:MGI Symbol;Acc:MGI:1913758]
ENSMUSG00000037902	226.687	262.638	258.01	322.645	922.806	467.667	371.738	522.889	571.275	267.495	-1.09532	0.000258389	Sirpa	signal-regulatory protein alpha [Source:MGI Symbol;Acc:MGI:108563]
ENSMUSG00000039831	1500.22	1381.42	1416.03	1377.53	2189.11	2141.04	2235	1611.68	2044.21	1418.8	-0.527311	0.000261207	Arhgap29	Rho GTPase activating protein 29 [Source:MGI Symbol;Acc:MGI:2443818]
ENSMUSG00000030019	256.848	298.155	317.473	372.928	453.048	441.57	471.539	516.098	470.564	311.351	-0.596343	0.000263017	Fbxl14	F-box and leucine-rich repeat protein 14 [Source:MGI Symbol;Acc:MGI:2141676]
ENSMUSG00000000223	46.6996	46.7327	53.4161	85.8991	18.5675	19.8341	31.1307	14.7133	21.0614	58.1869	1.45385	0.000264793	Drp2	dystrophin related protein 2 [Source:MGI Symbol;Acc:MGI:107432]
ENSMUSG00000024853	4026.86	3878.81	3855.03	4211.15	2568.82	3216.26	2818.25	3202.98	2951.57	3992.96	0.436277	0.000264793	Sf3b2	splicing factor 3b, subunit 2 [Source:MGI Symbol;Acc:MGI:2441856]
ENSMUSG00000019726	306.466	300.024	331.583	307.98	507.822	566.838	501.754	365.57	485.496	311.513	-0.641381	0.000268072	Lyst	lysosomal trafficking regulator [Source:MGI Symbol;Acc:MGI:107448]
ENSMUSG00000021255	53.5099	100.943	135.052	90.0893	33.4215	41.756	47.6117	29.4267	38.054	94.8984	1.31444	0.000272166	Esrrb	estrogen related receptor, beta [Source:MGI Symbol;Acc:MGI:1346832]
ENSMUSG00000033585	254.902	357.972	218.704	310.075	473.472	581.452	387.303	658.704	525.233	285.413	-0.878426	0.000275031	Ndn	necdin [Source:MGI Symbol;Acc:MGI:97290]
ENSMUSG00000045968	467.969	143.937	307.394	238.841	91.9092	108.566	157.485	86.0164	110.994	289.535	1.38151	0.000275137	Teddm2	transmembrane epididymal family member 2 [Source:MGI Symbol;Acc:MGI:1923273]
ENSMUSG00000004567	1458.39	1464.6	1422.08	1744.17	1128.91	1061.65	1039.22	1211.02	1110.2	1522.31	0.455638	0.000275443	Mcoln1	mucolipin 1 [Source:MGI Symbol;Acc:MGI:1890498]
ENSMUSG00000027316	44.7537	32.7129	31.2434	16.7608	81.6971	90.8193	58.599	73.5666	76.1705	31.3677	-1.27455	0.000275648	Gfra4	glial cell line derived neurotrophic factor family receptor alpha 4 [Source:MGI Symbol;Acc:MGI:1341873]
ENSMUSG00000090266	397.919	418.725	464.619	442.066	568.166	549.091	627.193	608.905	588.339	430.832	-0.450042	0.000276773	Mettl23	methyltransferase like 23 [Source:MGI Symbol;Acc:MGI:1921569]
ENSMUSG00000020163	10296.3	8796.03	11030.9	9486.61	12197	14115.6	14758.7	13272.6	13586	9902.46	-0.456279	0.000277325	Uqcr11	ubiquinol-cytochrome c reductase, complex III subunit XI [Source:MGI Symbol;Acc:MGI:1913844]
ENSMUSG00000027386	17.5123	14.9545	22.1727	7.33285	47.3472	60.5462	29.2995	54.3261	47.8798	15.4931	-1.62065	0.000277655	Fbln7	fibulin 7 [Source:MGI Symbol;Acc:MGI:1917620]
ENSMUSG00000028300	1080.9	1584.24	1879.64	961.651	639.651	891.491	735.235	646.255	728.158	1376.61	0.918916	0.000277719	C9orf72	C9orf72, member of C9orf72-SMCR8 complex [Source:MGI Symbol;Acc:MGI:1920455]
ENSMUSG00000018008	99.2366	93.4654	101.793	85.8991	445.621	182.682	136.426	211.646	244.094	95.0985	-1.36056	0.000277719	Cyth4	cytohesin 4 [Source:MGI Symbol;Acc:MGI:2441702]
ENSMUSG00000039099	74.9139	89.7268	116.911	81.7089	194.959	173.287	127.27	173.165	167.17	90.815	-0.87979	0.000278958	Wdr93	WD repeat domain 93 [Source:MGI Symbol;Acc:MGI:3646885]
ENSMUSG00000021193	1956.52	1931.93	1776.84	1903.4	1510.47	1576.29	1418.28	1456.62	1490.41	1892.17	0.344506	0.000280713	Pitrm1	pitrilysin metallepetidase 1 [Source:MGI Symbol;Acc:MGI:1916867]
ENSMUSG00000041712	1037.12	958.02	867.759	961.651	618.298	670.184	770.028	705.108	690.905	956.137	0.468789	0.000280738	Ubr7	ubiquitin protein ligase E3 component n-recognin 7 (putative) [Source:MGI Symbol;Acc:MGI:1913872]
ENSMUSG00000008540	15172.5	14006.7	12967	14603.9	9295.83	11282.5	11297.7	9189.04	10266.3	14187.5	0.466679	0.000285179	Mgst1	microsomal glutathione S-transferase 1 [Source:MGI Symbol;Acc:MGI:1913850]
ENSMUSG00000020361	2511.07	2707.69	2703.05	2814.77	3251.17	3262.19	3448.19	3478	3359.89	2684.15	-0.323967	0.000286512	Hspa4	heat shock protein 4 [Source:MGI Symbol;Acc:MGI:1342292]
ENSMUSG00000024538	165.394	229.925	212.656	166.56	348.141	315.258	267.358	315.771	311.632	193.634	-0.685231	0.000288716	Ppic	peptidylprolyl isomerase C [Source:MGI Symbol;Acc:MGI:97751]
ENSMUSG00000028600	1363.04	1298.23	1231.59	1183.73	411.271	848.691	833.205	419.896	628.265	1269.15	1.01414	0.00028998	Podn	podocan [Source:MGI Symbol;Acc:MGI:2674939]
ENSMUSG00000027797	28.2143	24.301	27.212	21.9985	129.973	54.2828	52.1898	55.4579	72.9758	25.4315	-1.52346	0.00028998	Dclk1	doublecortin-like kinase 1 [Source:MGI Symbol;Acc:MGI:1330861]
ENSMUSG00000041361	229.606	266.376	316.465	216.843	180.105	159.717	142.835	133.552	154.052	257.323	0.73878	0.000292518	Myzap	myocardial zonula adherens protein [Source:MGI Symbol;Acc:MGI:2142908]
ENSMUSG00000003380	6517.51	5878.97	6195.26	5437.83	3405.28	4321.75	4683.34	4382.31	4198.17	6007.39	0.517063	0.000293024	Rabac1	Rab acceptor 1 (prenylated) [Source:MGI Symbol;Acc:MGI:1201692]
ENSMUSG00000027203	127.451	164.499	158.233	147.705	228.381	222.351	235.312	215.041	225.271	149.472	-0.592456	0.000296612	Dut	deoxyuridine triphosphatase [Source:MGI Symbol;Acc:MGI:1346051]
ENSMUSG00000002342	827.944	810.345	930.246	883.084	574.665	601.286	632.686	708.503	629.285	862.905	0.456234	0.000299196	Tmem161a	transmembrane protein 161A [Source:MGI Symbol;Acc:MGI:2384577]
ENSMUSG00000041220	20580.9	13502	13933.5	19475	35731.3	33930.9	19863.2	35470.4	31249	16872.9	-0.889101	0.000299196	Elovl6	ELOVL family member 6, elongation of long chain fatty acids (yeast) [Source:MGI Symbol;Acc:MGI:2156528]
ENSMUSG00000019487	1738.59	1798.27	2098.34	1637.32	1102.91	1421.79	1186.63	1337.78	1262.28	1818.13	0.526964	0.000301204	Trip10	thyroid hormone receptor interactor 10 [Source:MGI Symbol;Acc:MGI:2146901]
ENSMUSG00000022837	299.656	281.331	241.884	229.413	182.89	160.761	181.291	160.715	171.414	263.071	0.617028	0.000302043	Iqcb1	IQ calmodulin-binding motif containing 1 [Source:MGI Symbol;Acc:MGI:2443764]
ENSMUSG00000015869	787.082	851.47	817.367	864.229	554.241	586.672	643.674	673.418	614.501	830.037	0.434447	0.000302526	Prpsap1	phosphoribosyl pyrophosphate synthetase-associated protein 1 [Source:MGI Symbol;Acc:MGI:1915013]
ENSMUSG00000030061	1095.49	1282.34	1143.91	1406.86	1681.29	1594.04	1903.55	1719.2	1724.52	1232.15	-0.485336	0.000303384	Uba3	ubiquitin-like modifier activating enzyme 3 [Source:MGI Symbol;Acc:MGI:1341217]
ENSMUSG00000028998	1584.87	1411.33	1773.82	1401.62	2025.72	2228.73	2332.06	2007.8	2148.58	1542.91	-0.477897	0.000304878	Tomm7	translocase of outer mitochondrial membrane 7 [Source:MGI Symbol;Acc:MGI:1913419]
ENSMUSG00000046841	81.7242	90.6614	117.918	80.6613	289.653	149.278	137.341	225.227	200.375	92.7414	-1.11146	0.000307547	Ckap4	cytoskeleton-associated protein 4 [Source:MGI Symbol;Acc:MGI:2444926]
ENSMUSG00000036144	129.397	148.61	125.981	119.421	252.518	210.868	179.46	354.252	249.274	130.852	-0.926775	0.000308772	Meox2	mesenchyme homeobox 2 [Source:MGI Symbol;Acc:MGI:103219]
ENSMUSG00000062078	4056.05	3499.34	3783.47	3682.14	5148.77	4784.19	5630.09	4560	5030.76	3755.25	-0.422076	0.000310449	Qk	quaking [Source:MGI Symbol;Acc:MGI:97837]
ENSMUSG00000043702	261.712	276.658	263.049	339.406	388.061	394.594	481.611	528.548	448.204	285.206	-0.652051	0.000313846	Pde12	phosphodiesterase 12 [Source:MGI Symbol;Acc:MGI:2443226]
ENSMUSG00000031445	2.91872	6.54258	10.0785	12.5706	30.6364	31.317	33.8776	21.5041	29.3338	8.0276	-1.8844	0.000313846	Proz	protein Z, vitamin K-dependent plasma glycoprotein [Source:MGI Symbol;Acc:MGI:1860488]
ENSMUSG00000024687	1918.57	2112.32	2024.77	2193.57	1635.8	1639.97	1634.36	1644.5	1638.66	2062.31	0.331684	0.000313852	Osbp	oxysterol binding protein [Source:MGI Symbol;Acc:MGI:97447]
ENSMUSG00000029554	116.749	143.937	177.382	164.465	64.058	86.6437	90.6454	91.6753	83.2556	150.633	0.856889	0.000314109	Mad1l1	MAD1 mitotic arrest deficient 1-like 1 [Source:MGI Symbol;Acc:MGI:1341857]
ENSMUSG00000057465	34.0518	33.6475	65.5103	37.7118	15.7824	15.6585	16.481	9.05435	14.2441	42.7303	1.5736	0.000315604	Saa2	serum amyloid A 2 [Source:MGI Symbol;Acc:MGI:98222]
ENSMUSG00000024855	808.486	865.489	863.728	707.096	506.893	492.721	450.48	666.627	529.18	811.2	0.618005	0.000317955	Pacs1	phosphofurin acidic cluster sorting protein 1 [Source:MGI Symbol;Acc:MGI:1277113]
ENSMUSG00000052459	2515.94	2266.54	2090.28	2505.74	3298.52	3120.22	3013.27	2966.43	3099.61	2344.62	-0.402875	0.000318997	Atp6v1a	ATPase, H+ transporting, lysosomal V1 subunit A [Source:MGI Symbol;Acc:MGI:1201780]
ENSMUSG00000024014	2857.43	2618.9	3767.34	2970.85	5578.61	10232.3	3223.86	9984.69	7254.87	3053.63	-1.24836	0.000319164	Pim1	proviral integration site 1 [Source:MGI Symbol;Acc:MGI:97584]
ENSMUSG00000034110	113.83	124.309	109.856	133.039	75.1985	73.073	50.3585	73.5666	68.0492	120.258	0.824894	0.000319952	Kctd7	potassium channel tetramerisation domain containing 7 [Source:MGI Symbol;Acc:MGI:2442265]
ENSMUSG00000018334	298.683	300.958	446.478	365.595	749.2	755.784	406.531	802.442	678.489	352.928	-0.942701	0.000320801	Ksr1	kinase suppressor of ras 1 [Source:MGI Symbol;Acc:MGI:105051]
ENSMUSG00000007029	1118.84	1138.41	1106.62	1161.73	758.483	680.623	800.243	954.103	798.363	1131.4	0.503687	0.000323139	Vars	valyl-tRNA synthetase [Source:MGI Symbol;Acc:MGI:90675]
ENSMUSG00000074656	2600.58	2595.53	2394.65	2861.91	2128.77	1996.98	1979.55	1996.49	2025.45	2613.17	0.367377	0.000324409	Eif2s2	eukaryotic translation initiation factor 2, subunit 2 (beta) [Source:MGI Symbol;Acc:MGI:1914454]
ENSMUSG00000020458	9490.71	7841.74	8984.99	7787.48	10715.3	12081.1	11563.2	11184.4	11386	8526.23	-0.417263	0.000324578	Rtn4	reticulon 4 [Source:MGI Symbol;Acc:MGI:1915835]
ENSMUSG00000059811	3227.13	2526.37	2883.46	2035.39	3942.81	5769.63	8583.84	3797.17	5523.37	2668.09	-1.04978	0.000324578	Atl2	atlastin GTPase 2 [Source:MGI Symbol;Acc:MGI:1929492]
ENSMUSG00000019794	450.456	460.784	433.376	429.495	606.23	605.462	559.438	568.161	584.822	443.528	-0.39863	0.000324641	Katna1	katanin p60 (ATPase-containing) subunit A1 [Source:MGI Symbol;Acc:MGI:1344353]
ENSMUSG00000040331	1059.5	1046.81	1029.02	978.411	750.128	871.656	747.138	751.511	780.108	1028.43	0.399228	0.000326587	Nsmce4a	NSE4 homolog A, SMC5-SMC6 complex component [Source:MGI Symbol;Acc:MGI:1915122]
ENSMUSG00000040212	131.343	131.786	119.934	130.944	316.576	210.868	186.784	198.064	228.073	128.502	-0.829015	0.00032663	Emp3	epithelial membrane protein 3 [Source:MGI Symbol;Acc:MGI:1098729]
ENSMUSG00000027509	826.971	916.895	875.822	791.948	621.084	675.403	616.205	666.627	644.83	852.909	0.404607	0.000327317	Rae1	ribonucleic acid export 1 [Source:MGI Symbol;Acc:MGI:1913929]
ENSMUSG00000043162	1236.57	1158.04	1031.03	1198.4	1449.2	1483.38	1749.73	1634.31	1579.15	1156.01	-0.449998	0.000329607	Pyurf	Pigy upstream reading frame [Source:MGI Symbol;Acc:MGI:1913709]
ENSMUSG00000023106	1754.15	1673.96	1747.61	1813.31	1129.83	1269.38	1475.96	1274.4	1287.39	1747.26	0.440408	0.000329954	Denr	density-regulated protein [Source:MGI Symbol;Acc:MGI:1915434]
ENSMUSG00000043140	713.141	754.266	765.966	832.802	973.867	985.442	1284.6	1158.96	1100.72	766.544	-0.522298	0.0003301	Tmem186	transmembrane protein 186 [Source:MGI Symbol;Acc:MGI:1913940]
ENSMUSG00000037851	1288.13	1328.14	1225.55	1214.11	1065.78	780.837	889.973	801.31	884.474	1263.98	0.514299	0.000331211	Iars	isoleucine-tRNA synthetase [Source:MGI Symbol;Acc:MGI:2145219]
ENSMUSG00000017760	2251.31	2417.01	2210.22	2246.99	1838.18	1539.75	1577.6	1864.07	1704.9	2281.38	0.420483	0.00033165	Ctsa	cathepsin A [Source:MGI Symbol;Acc:MGI:97748]
ENSMUSG00000022816	490.345	610.329	526.098	471.397	1270.02	962.476	653.745	829.605	928.961	524.542	-0.824454	0.000332473	Fstl1	follistatin-like 1 [Source:MGI Symbol;Acc:MGI:102793]
ENSMUSG00000061455	1447.69	1355.25	1314.24	1280.11	855.034	1006.32	1098.73	806.969	941.764	1349.32	0.518291	0.000335139	Stx17	syntaxin 17 [Source:MGI Symbol;Acc:MGI:1914977]
ENSMUSG00000026617	1257	1451.52	1350.52	1572.37	1972.8	1870.67	1760.72	1985.17	1897.34	1407.85	-0.43047	0.000337544	Bpnt1	bisphosphate 3'-nucleotidase 1 [Source:MGI Symbol;Acc:MGI:1338800]
ENSMUSG00000030082	1723.99	2643.2	1918.95	2382.13	1289.51	1392.56	1362.43	1557.35	1400.46	2167.07	0.63014	0.000337698	Sec61a1	Sec61 alpha 1 subunit (S. cerevisiae) [Source:MGI Symbol;Acc:MGI:1858417]
ENSMUSG00000049164	208.202	207.493	190.484	191.702	406.629	354.926	386.387	227.491	343.858	199.47	-0.787423	0.000339287	Zfp518a	zinc finger protein 518A [Source:MGI Symbol;Acc:MGI:1919922]
ENSMUSG00000041515	46.6996	46.7327	62.4867	41.902	258.089	108.566	75.08	115.443	139.294	49.4552	-1.49514	0.000340127	Irf8	interferon regulatory factor 8 [Source:MGI Symbol;Acc:MGI:96395]
ENSMUSG00000025127	41.835	30.8436	26.2041	15.7132	0	5.2195	4.57805	10.1861	4.99592	28.649	2.5571	0.000340407	Gcgr	glucagon receptor [Source:MGI Symbol;Acc:MGI:99572]
ENSMUSG00000003038	572.07	503.778	574.475	543.678	434.48	407.121	386.387	392.733	405.18	548.5	0.43625	0.000342493	Hmgn2	high mobility group nucleosomal binding domain 2 [Source:MGI Symbol;Acc:MGI:96136]
ENSMUSG00000032263	3599.76	3612.44	3542.59	3724.04	2507.54	2885.34	2974.82	2922.29	2822.5	3619.71	0.359041	0.000342493	Bckdhb	branched chain ketoacid dehydrogenase E1, beta polypeptide [Source:MGI Symbol;Acc:MGI:88137]
ENSMUSG00000030798	34.0518	34.5822	33.2591	33.5216	115.119	65.7657	52.1898	81.4892	78.6408	33.8537	-1.21616	0.00034302	Cd37	CD37 antigen [Source:MGI Symbol;Acc:MGI:88330]
ENSMUSG00000029131	2761.11	2730.12	2975.17	2914.28	1810.33	2361.3	2133.37	2115.32	2105.08	2845.17	0.434822	0.000343733	Dnajb6	DnaJ heat shock protein family (Hsp40) member B6 [Source:MGI Symbol;Acc:MGI:1344381]
ENSMUSG00000067925	104.101	118.701	125.981	122.563	224.667	160.761	175.797	204.855	191.52	117.837	-0.701508	0.000346894	Rtl8a	retrotransposon Gag like 8A [Source:MGI Symbol;Acc:MGI:1913408]
ENSMUSG00000031981	59.3474	62.6218	67.526	47.1397	18.5675	13.5707	37.54	12.4497	20.532	59.1587	1.51171	0.000351924	Capn9	calpain 9 [Source:MGI Symbol;Acc:MGI:1920897]
ENSMUSG00000021313	6.81035	11.2158	12.0942	5.23775	45.4904	36.5365	32.0463	16.9769	32.7625	8.83954	-1.89108	0.000354091	Ryr2	ryanodine receptor 2, cardiac [Source:MGI Symbol;Acc:MGI:99685]
ENSMUSG00000036492	6.81035	20.5624	20.157	15.7132	0.928376	3.1317	0	2.26359	1.58092	15.8107	3.37792	0.000354801	Rnf39	ring finger protein 39 [Source:MGI Symbol;Acc:MGI:2156378]
ENSMUSG00000030530	3544.3	4208.75	4000.16	3362.63	2696.93	2482.39	2545.4	3080.74	2701.37	3778.96	0.48458	0.000354801	Furin	furin (paired basic amino acid cleaving enzyme) [Source:MGI Symbol;Acc:MGI:97513]
ENSMUSG00000029815	744.274	694.448	674.252	765.759	512.464	529.257	572.256	554.579	542.139	719.683	0.408561	0.000354801	Malsu1	mitochondrial assembly of ribosomal large subunit 1 [Source:MGI Symbol;Acc:MGI:1922843]
ENSMUSG00000038543	145.936	152.349	113.887	134.086	259.945	218.175	215.168	187.878	220.292	136.565	-0.690706	0.000356082	BC028528	cDNA sequence BC028528 [Source:MGI Symbol;Acc:MGI:2385885]
ENSMUSG00000026358	4.86454	1.86931	0	3.14265	60.3444	12.5268	21.059	9.05435	25.7462	2.46912	-3.38707	0.000356532	Rgs1	regulator of G-protein signaling 1 [Source:MGI Symbol;Acc:MGI:1354694]
ENSMUSG00000028524	65.1848	58.8832	66.5181	79.6138	36.2067	30.2731	20.1434	38.481	31.276	67.55	1.11632	0.000356622	Sgip1	SH3-domain GRB2-like (endophilin) interacting protein 1 [Source:MGI Symbol;Acc:MGI:1920344]
ENSMUSG00000024091	1671.46	1648.73	1764.75	1829.02	1300.65	1265.21	1316.65	1462.28	1336.2	1728.49	0.371646	0.000359369	Vapa	vesicle-associated membrane protein, associated protein A [Source:MGI Symbol;Acc:MGI:1353561]
ENSMUSG00000046434	4846.05	3841.43	4060.63	3439.11	2622.66	3174.5	2432.78	2704.99	2733.73	4046.8	0.566089	0.000360615	Hnrnpa1	heterogeneous nuclear ribonucleoprotein A1 [Source:MGI Symbol;Acc:MGI:104820]
ENSMUSG00000027709	3705.8	3687.21	3620.2	3415.01	4426.5	4586.9	5513.8	4634.7	4790.47	3607.06	-0.409405	0.000361867	Mccc1	methylcrotonoyl-Coenzyme A carboxylase 1 (alpha) [Source:MGI Symbol;Acc:MGI:1919289]
ENSMUSG00000028744	275.333	308.436	273.127	367.69	222.81	177.463	189.531	199.196	197.25	306.147	0.632877	0.000362375	Pqlc2	PQ loop repeat containing 2 [Source:MGI Symbol;Acc:MGI:2384837]
ENSMUSG00000030269	3177.52	2953.51	2554.9	2388.41	1553.17	1868.58	1893.48	1018.61	1583.46	2768.58	0.805782	0.00036537	Mtmr14	myotubularin related protein 14 [Source:MGI Symbol;Acc:MGI:1916075]
ENSMUSG00000044533	15423.5	13843.2	15068.4	14475	10971.5	11022.5	12652.8	11434.5	11520.4	14702.5	0.351836	0.000366599	Rps2	ribosomal protein S2 [Source:MGI Symbol;Acc:MGI:105110]
ENSMUSG00000004996	394.028	406.574	397.093	408.544	262.73	281.853	294.826	322.561	290.493	401.56	0.46888	0.000368703	Mri1	methylthioribose-1-phosphate isomerase 1 [Source:MGI Symbol;Acc:MGI:1915123]
ENSMUSG00000015745	127.451	151.414	179.397	137.229	395.488	208.78	221.578	337.275	290.78	148.873	-0.965811	0.000369903	Plekho1	pleckstrin homology domain containing, family O member 1 [Source:MGI Symbol;Acc:MGI:1914470]
ENSMUSG00000027865	549.693	507.517	463.611	504.919	378.777	367.453	383.641	371.229	375.275	506.435	0.432225	0.000371444	Gdap2	ganglioside-induced differentiation-associated-protein 2 [Source:MGI Symbol;Acc:MGI:1338001]
ENSMUSG00000031604	168.313	198.147	163.272	233.604	287.797	276.633	306.729	305.584	294.186	190.834	-0.625225	0.000382655	Msmo1	methylsterol monoxygenase 1 [Source:MGI Symbol;Acc:MGI:1913484]
ENSMUSG00000020926	212.094	297.22	279.175	294.361	131.829	155.541	197.772	162.978	162.03	270.712	0.739883	0.000382843	Adam11	a disintegrin and metallopeptidase domain 11 [Source:MGI Symbol;Acc:MGI:1098667]
ENSMUSG00000047264	579.853	561.727	579.514	489.206	318.433	365.365	381.809	442.532	377.035	552.575	0.553464	0.000384467	Zfp358	zinc finger protein 358 [Source:MGI Symbol;Acc:MGI:2153740]
ENSMUSG00000085412	0	0.934654	0	1.04755	25.0662	19.8341	2.74683	19.2405	16.7219	0.495551	-5.07865	0.000384467	Halr1	Hoxa adjacent long noncoding RNA 1 [Source:MGI Symbol;Acc:MGI:3705267]
ENSMUSG00000031434	69.0764	95.3347	71.5574	107.898	164.323	129.444	173.966	147.133	153.716	85.9665	-0.841096	0.000387966	Morc4	microrchidia 4 [Source:MGI Symbol;Acc:MGI:1922996]
ENSMUSG00000038010	55.4557	43.9287	62.4867	50.2824	104.907	98.1266	81.4893	100.73	96.313	53.0384	-0.860715	0.000394134	Ccdc138	coiled-coil domain containing 138 [Source:MGI Symbol;Acc:MGI:1923388]
ENSMUSG00000023075	776.38	845.862	836.516	1126.12	1229.17	1264.16	1458.57	1718.06	1417.49	896.218	-0.66141	0.000399162	Akirin1	akirin 1 [Source:MGI Symbol;Acc:MGI:1915300]
ENSMUSG00000027660	425.161	304.697	439.423	412.735	648.935	1220.32	620.783	620.223	777.565	395.504	-0.975301	0.000402481	Skil	SKI-like [Source:MGI Symbol;Acc:MGI:106203]
ENSMUSG00000074218	9131.71	9854.05	10409.1	9229.96	12334.4	13257.5	12584.1	11417.5	12398.4	9656.2	-0.360653	0.00040641	Cox7a1	cytochrome c oxidase subunit 7A1 [Source:MGI Symbol;Acc:MGI:1316714]
ENSMUSG00000031672	1292.99	1013.16	1874.6	888.322	593.232	678.535	683.045	767.357	680.542	1267.27	0.897249	0.000409252	Got2	glutamatic-oxaloacetic transaminase 2, mitochondrial [Source:MGI Symbol;Acc:MGI:95792]
ENSMUSG00000036890	180.961	166.368	203.586	164.465	104.907	127.356	117.198	106.389	113.962	178.845	0.650017	0.000409433	Gtdc1	glycosyltransferase-like domain containing 1 [Source:MGI Symbol;Acc:MGI:2444269]
ENSMUSG00000020265	1065.33	999.145	1034.05	1084.21	820.684	840.339	746.222	839.791	811.759	1045.69	0.365836	0.000411133	Sumo3	small ubiquitin-like modifier 3 [Source:MGI Symbol;Acc:MGI:1336201]
ENSMUSG00000041417	1221.97	921.569	960.481	1153.35	4797.85	4764.36	3089.27	1283.45	3483.73	1064.34	-1.71074	0.000411133	Pik3r1	phosphoinositide-3-kinase regulatory subunit 1 [Source:MGI Symbol;Acc:MGI:97583]
ENSMUSG00000042506	985.555	946.804	1035.06	860.038	601.588	746.388	675.72	737.93	690.407	956.865	0.471961	0.000412964	Usp22	ubiquitin specific peptidase 22 [Source:MGI Symbol;Acc:MGI:2144157]
ENSMUSG00000055541	10.702	5.60792	13.1021	3.14265	81.6971	44.8877	15.5654	28.2949	42.6113	8.13865	-2.38863	0.000412964	Lair1	leukocyte-associated Ig-like receptor 1 [Source:MGI Symbol;Acc:MGI:105492]
ENSMUSG00000051596	3655.21	3475.98	3564.77	5545.73	6106.86	6858.42	6015.56	9267.13	7061.99	4060.42	-0.798428	0.000413029	Otop1	otopetrin 1 [Source:MGI Symbol;Acc:MGI:2388363]
ENSMUSG00000064061	43.7808	34.5822	41.3219	24.0936	91.9092	102.302	68.6707	58.8533	80.4339	35.9446	-1.16127	0.000413249	Dzip3	DAZ interacting protein 3, zinc finger [Source:MGI Symbol;Acc:MGI:1917433]
ENSMUSG00000020570	3971.41	4116.22	4214.83	4682.55	2796.27	2911.44	3562.64	2466.18	2934.13	4246.25	0.532936	0.000414935	Sypl	synaptophysin-like protein [Source:MGI Symbol;Acc:MGI:108081]
ENSMUSG00000055322	30310	35923.4	36943.8	33417.9	18730	24340.6	27598.3	22123.2	23198	34148.8	0.557826	0.000417237	Tns1	tensin 1 [Source:MGI Symbol;Acc:MGI:104552]
ENSMUSG00000059586	418.35	330.867	353.755	414.83	250.662	279.765	259.118	258.049	261.898	379.451	0.534746	0.000418801	Nsmce2	NSE2/MMS21 homolog, SMC5-SMC6 complex SUMO ligase [Source:MGI Symbol;Acc:MGI:1915751]
ENSMUSG00000050017	1451.58	1586.11	1517.82	1654.08	1110.34	1154.55	1058.44	1310.62	1158.49	1552.4	0.423008	0.000418801	Pitpnb	phosphatidylinositol transfer protein, beta [Source:MGI Symbol;Acc:MGI:1927542]
ENSMUSG00000078676	1104.25	1039.33	1055.22	1011.93	785.406	802.759	806.652	885.063	819.97	1052.68	0.36134	0.000425251	Casc3	cancer susceptibility candidate 3 [Source:MGI Symbol;Acc:MGI:2179723]
ENSMUSG00000038240	341.491	439.287	388.022	421.115	564.453	545.96	541.125	551.184	550.68	397.479	-0.470333	0.000429454	Pdss2	prenyl (solanesyl) diphosphate synthase, subunit 2 [Source:MGI Symbol;Acc:MGI:1918615]
ENSMUSG00000002266	658.658	282.265	286.23	300.647	208.885	130.487	175.797	86.0164	150.296	381.95	1.34333	0.000429664	Zim1	zinc finger, imprinted 1 [Source:MGI Symbol;Acc:MGI:1341879]
ENSMUSG00000032254	13.6207	4.67327	4.0314	6.2853	46.4188	32.3609	13.7341	38.481	32.7487	7.15267	-2.19119	0.000432143	Kif23	kinesin family member 23 [Source:MGI Symbol;Acc:MGI:1919069]
ENSMUSG00000063652	70.0493	71.0337	56.4396	65.9956	30.6364	37.5804	36.6244	28.2949	33.284	65.8796	0.983156	0.000432815	Slc22a21	solute carrier family 22 (organic cation transporter), member 21 [Source:MGI Symbol;Acc:MGI:1929481]
ENSMUSG00000062372	48.6454	37.3861	33.2591	21.9985	6.49863	17.7463	8.24049	3.39538	8.9702	35.3223	1.97797	0.000433243	Otof	otoferlin [Source:MGI Symbol;Acc:MGI:1891247]
ENSMUSG00000033220	37.9434	33.6475	41.3219	39.8069	167.108	87.6876	55.8522	83.7528	98.6001	38.1799	-1.37104	0.000434149	Rac2	Rac family small GTPase 2 [Source:MGI Symbol;Acc:MGI:97846]
ENSMUSG00000030089	114.803	95.3347	189.476	81.7089	60.3444	42.7999	59.5146	45.2718	51.9827	120.331	1.20696	0.0004358	Slc41a3	solute carrier family 41, member 3 [Source:MGI Symbol;Acc:MGI:1918949]
ENSMUSG00000028410	1253.1	1500.12	1452.31	1529.42	2863.11	2027.25	2329.31	1765.6	2246.32	1433.74	-0.64819	0.000435823	Dnaja1	DnaJ heat shock protein family (Hsp40) member A1 [Source:MGI Symbol;Acc:MGI:1270129]
ENSMUSG00000035378	136.207	117.766	118.926	112.088	77.0552	62.634	66.8395	82.621	72.2874	121.247	0.748646	0.000437075	Shq1	SHQ1 homolog (S. cerevisiae) [Source:MGI Symbol;Acc:MGI:1919421]
ENSMUSG00000027018	336.626	344.887	290.261	318.455	254.375	212.956	171.219	175.428	203.494	322.557	0.663516	0.000437635	Hat1	histone aminotransferase 1 [Source:MGI Symbol;Acc:MGI:96013]
ENSMUSG00000025272	32.1059	49.5366	62.4867	42.9495	105.835	112.741	98.8859	71.303	97.1912	46.7697	-1.05787	0.000438211	Tro	trophinin [Source:MGI Symbol;Acc:MGI:1928994]
ENSMUSG00000034880	2395.3	2639.46	2686.93	2440.79	3058.07	3245.48	3937.12	3968.07	3552.19	2540.62	-0.483407	0.000439802	Mrpl34	mitochondrial ribosomal protein L34 [Source:MGI Symbol;Acc:MGI:2137227]
ENSMUSG00000020263	1286.18	1123.45	1044.13	1011.93	681.428	724.467	918.357	668.89	748.285	1116.43	0.576685	0.000442474	Appl2	adaptor protein, phosphotyrosine interaction, PH domain and leucine zipper containing 2 [Source:MGI Symbol;Acc:MGI:2384914]
ENSMUSG00000032440	4279.82	4277.91	4868.93	4673.12	3172.26	3620.24	2279.87	2910.98	2995.84	4524.94	0.595039	0.000444085	Tgfbr2	transforming growth factor, beta receptor II [Source:MGI Symbol;Acc:MGI:98729]
ENSMUSG00000027339	146.909	176.65	197.539	180.179	350.926	310.038	224.324	275.026	290.079	175.319	-0.726851	0.000444085	Rassf2	Ras association (RalGDS/AF-6) domain family member 2 [Source:MGI Symbol;Acc:MGI:2442060]
ENSMUSG00000042198	1474.93	1282.34	1350.52	1251.82	855.963	1105.49	921.104	988.056	967.653	1339.9	0.470255	0.000444788	Chchd7	coiled-coil-helix-coiled-coil-helix domain containing 7 [Source:MGI Symbol;Acc:MGI:1913683]
ENSMUSG00000053475	24.3227	65.4258	33.2591	31.4265	15.7824	8.3512	10.9873	9.05435	11.0438	38.6085	1.79888	0.000445123	Tnfaip6	tumor necrosis factor alpha induced protein 6 [Source:MGI Symbol;Acc:MGI:1195266]
ENSMUSG00000020183	243.227	330.867	321.504	257.697	195.887	125.268	121.776	194.669	159.4	288.324	0.856528	0.000447599	Cpm	carboxypeptidase M [Source:MGI Symbol;Acc:MGI:1917824]
ENSMUSG00000024818	54.4828	72.903	56.4396	57.6152	117.904	105.434	87.8985	125.629	109.216	60.3602	-0.85119	0.000452923	Slc25a45	solute carrier family 25, member 45 [Source:MGI Symbol;Acc:MGI:2147731]
ENSMUSG00000023018	379.434	529.949	492.839	486.063	618.298	880.008	659.239	883.931	760.369	472.071	-0.686727	0.000454264	Smarcd1	SWI/SNF related, matrix associated, actin dependent regulator of chromatin, subfamily d, member 1 [Source:MGI Symbol;Acc:MGI:1933623]
ENSMUSG00000037318	2.91872	0.934654	0	2.0951	17.6391	10.439	11.9029	14.7133	13.6736	1.48712	-3.20442	0.000458942	Traf3ip3	TRAF3 interacting protein 3 [Source:MGI Symbol;Acc:MGI:2441706]
ENSMUSG00000027668	3333.18	2999.3	3037.66	2587.45	2083.28	2316.41	2318.32	2178.7	2224.18	2989.4	0.426695	0.000466621	Mfn1	mitofusin 1 [Source:MGI Symbol;Acc:MGI:1914664]
ENSMUSG00000039046	581.799	520.602	556.333	548.916	449.334	387.287	412.94	383.678	408.31	551.913	0.433197	0.000466873	Usp6nl	USP6 N-terminal like [Source:MGI Symbol;Acc:MGI:2138893]
ENSMUSG00000053198	64.2119	100.008	81.6359	81.7089	43.6337	41.756	43.9493	43.0082	43.0868	81.8912	0.926709	0.000468831	Prx	periaxin [Source:MGI Symbol;Acc:MGI:108176]
ENSMUSG00000060548	71.9952	6.54258	98.7693	23.0461	6.49863	5.2195	10.9873	5.65897	7.09111	50.0883	2.8122	0.000469335	Tnfrsf19	tumor necrosis factor receptor superfamily, member 19 [Source:MGI Symbol;Acc:MGI:1352474]
ENSMUSG00000047821	759.841	803.802	714.566	602.341	358.353	421.736	579.581	426.686	446.589	720.138	0.689078	0.00047134	Trim16	tripartite motif-containing 16 [Source:MGI Symbol;Acc:MGI:2137356]
ENSMUSG00000033739	211.121	242.075	174.358	248.269	285.94	353.882	359.835	416.5	354.039	218.956	-0.691844	0.000472727	Fkbpl	FK506 binding protein-like [Source:MGI Symbol;Acc:MGI:1932127]
ENSMUSG00000031671	338.572	309.37	296.308	381.308	252.518	220.263	209.675	211.646	223.525	331.39	0.566506	0.000475031	Setd6	SET domain containing 6 [Source:MGI Symbol;Acc:MGI:1913333]
ENSMUSG00000062210	482.562	466.392	498.886	434.733	675.858	690.018	619.868	576.083	640.457	470.643	-0.444806	0.000478587	Tnfaip8	tumor necrosis factor, alpha-induced protein 8 [Source:MGI Symbol;Acc:MGI:2147191]
ENSMUSG00000030469	81.7242	105.616	65.5103	107.898	197.744	175.375	137.341	149.397	164.964	90.187	-0.871519	0.000484184	Zfp719	zinc finger protein 719 [Source:MGI Symbol;Acc:MGI:2444708]
ENSMUSG00000054150	969.016	768.285	873.806	600.246	500.395	516.73	300.32	225.227	385.668	802.838	1.05724	0.000485403	Syne3	spectrin repeat containing, nuclear envelope family member 3 [Source:MGI Symbol;Acc:MGI:2442408]
ENSMUSG00000079317	199.446	264.507	181.413	243.032	313.791	371.628	351.594	336.143	343.289	222.099	-0.627507	0.00048611	Trappc2	trafficking protein particle complex 2 [Source:MGI Symbol;Acc:MGI:1913476]
ENSMUSG00000024074	852.267	814.083	1020.95	737.475	624.797	631.559	562.184	570.424	597.241	856.194	0.519608	0.000486996	Crim1	cysteine rich transmembrane BMP regulator 1 (chordin like) [Source:MGI Symbol;Acc:MGI:1354756]
ENSMUSG00000028644	24.3227	12.1505	22.1727	16.7608	4.64188	3.1317	3.66244	4.52718	3.9908	18.8517	2.23927	0.000488562	Ermap	erythroblast membrane-associated protein [Source:MGI Symbol;Acc:MGI:1349816]
ENSMUSG00000059278	658.658	590.701	529.121	581.39	764.054	751.608	896.382	868.086	820.032	589.968	-0.474793	0.000489643	Naa38	N(alpha)-acetyltransferase 38, NatC auxiliary subunit [Source:MGI Symbol;Acc:MGI:1925554]
ENSMUSG00000019846	1144.14	1522.55	1275.94	1677.13	2601.31	2179.66	1969.48	1942.16	2173.15	1404.94	-0.629517	0.000490477	Lama4	laminin, alpha 4 [Source:MGI Symbol;Acc:MGI:109321]
ENSMUSG00000040818	516.614	463.588	451.517	467.207	615.513	627.384	684.876	604.378	633.038	474.732	-0.41569	0.000491166	Dennd6a	DENN/MADD domain containing 6A [Source:MGI Symbol;Acc:MGI:2442980]
ENSMUSG00000008200	1434.07	1389.83	1417.04	1314.67	950.657	1021.98	1191.21	976.739	1035.15	1388.9	0.423704	0.000494168	Fnbp4	formin binding protein 4 [Source:MGI Symbol;Acc:MGI:1860513]
ENSMUSG00000046711	541.91	500.04	503.925	609.674	386.204	260.975	326.873	402.919	344.243	538.887	0.646565	0.000496424	Hmga1	high mobility group AT-hook 1 [Source:MGI Symbol;Acc:MGI:96160]
ENSMUSG00000020847	57.4015	93.4654	90.7065	70.1858	37.135	42.7999	22.8902	39.6128	35.6095	77.9398	1.13701	0.000498852	Rph3al	rabphilin 3A-like (without C2 domains) [Source:MGI Symbol;Acc:MGI:1923492]
ENSMUSG00000033294	293.818	325.259	348.716	305.885	181.033	193.121	173.966	261.444	202.391	318.42	0.657598	0.000503159	Noc4l	NOC4 like [Source:MGI Symbol;Acc:MGI:2140843]
ENSMUSG00000036104	2510.1	2148.77	2064.08	2072.05	1466.83	1600.3	1811.08	1513.21	1597.85	2198.75	0.460399	0.000506741	Rab3gap1	RAB3 GTPase activating protein subunit 1 [Source:MGI Symbol;Acc:MGI:2445001]
ENSMUSG00000048827	144.963	107.485	110.864	98.4697	66.8431	66.8096	70.502	48.6672	63.2054	115.445	0.86492	0.000511836	Pkd1l3	polycystic kidney disease 1 like 3 [Source:MGI Symbol;Acc:MGI:2664670]
ENSMUSG00000002617	65.1848	73.8376	56.4396	58.6628	149.469	127.356	107.126	89.4118	118.341	63.5312	-0.898362	0.000512796	Zfp40	zinc finger protein 40 [Source:MGI Symbol;Acc:MGI:99185]
ENSMUSG00000053470	1449.63	1264.59	1158.02	905.083	641.508	681.667	925.682	612.301	715.289	1194.33	0.739205	0.00051596	Kdm3a	lysine (K)-specific demethylase 3A [Source:MGI Symbol;Acc:MGI:98847]
ENSMUSG00000048897	331.761	305.632	361.818	325.788	583.02	531.345	380.894	615.696	527.739	331.25	-0.671091	0.000516409	Zfp710	zinc finger protein 710 [Source:MGI Symbol;Acc:MGI:1921747]
ENSMUSG00000022221	33.0789	29.9089	53.4161	52.3775	112.334	90.8193	63.1771	112.048	94.5944	42.1953	-1.16658	0.000518778	Ripk3	receptor-interacting serine-threonine kinase 3 [Source:MGI Symbol;Acc:MGI:2154952]
ENSMUSG00000001281	25.2956	21.497	25.1963	10.4755	129.044	55.3267	41.2024	49.799	68.8431	20.6161	-1.73921	0.000523163	Itgb7	integrin beta 7 [Source:MGI Symbol;Acc:MGI:96616]
ENSMUSG00000031853	27.2414	23.3663	37.2905	18.8559	2.78513	6.2634	11.9029	2.26359	5.80376	26.6885	2.17909	0.000528775	Map3k21	mitogen-activated protein kinase kinase kinase 21 [Source:MGI Symbol;Acc:MGI:2385307]
ENSMUSG00000017428	2939.15	3065.66	2993.32	3722.99	2324.65	2181.75	2087.59	2562.38	2289.09	3180.28	0.474511	0.000530412	Psmd11	proteasome (prosome, macropain) 26S subunit, non-ATPase, 11 [Source:MGI Symbol;Acc:MGI:1916327]
ENSMUSG00000029445	186.798	190.669	261.033	125.706	67.7715	46.9755	123.607	30.5584	67.2282	191.052	1.50092	0.000531551	Hpd	4-hydroxyphenylpyruvic acid dioxygenase [Source:MGI Symbol;Acc:MGI:96213]
ENSMUSG00000026860	3097.74	3036.69	2965.1	3470.53	2102.77	2414.54	2531.66	2449.2	2374.54	3142.51	0.404301	0.000531685	Sh3glb2	SH3-domain GRB2-like endophilin B2 [Source:MGI Symbol;Acc:MGI:2385131]
ENSMUSG00000097195	375.542	328.998	339.646	272.363	174.535	156.585	261.864	146.001	184.746	329.137	0.830404	0.000532911	Snhg5	small nucleolar RNA host gene 5 [Source:MGI Symbol;Acc:MGI:1919905]
ENSMUSG00000005951	676.171	692.578	725.652	737.475	505.965	494.809	597.893	492.331	522.749	707.969	0.436143	0.000532911	Shpk	sedoheptulokinase [Source:MGI Symbol;Acc:MGI:1921887]
ENSMUSG00000006205	558.449	750.527	631.922	494.443	1045.35	953.081	820.386	907.699	931.629	608.835	-0.613148	0.000532911	Htra1	HtrA serine peptidase 1 [Source:MGI Symbol;Acc:MGI:1929076]
ENSMUSG00000046814	51.5641	50.4713	59.4632	50.2824	18.5675	24.0097	24.7215	31.6902	24.7472	52.9452	1.10624	0.000533658	Gchfr	GTP cyclohydrolase I feedback regulator [Source:MGI Symbol;Acc:MGI:2443977]
ENSMUSG00000034709	635.309	541.165	521.059	496.539	416.841	397.726	351.594	384.81	387.743	548.518	0.500983	0.000543071	Ppp1r21	protein phosphatase 1, regulatory subunit 21 [Source:MGI Symbol;Acc:MGI:1921075]
ENSMUSG00000027244	1560.54	1649.66	1697.22	1832.16	1306.23	1191.09	1306.58	1374	1294.47	1684.9	0.380204	0.000543071	Atg13	autophagy related 13 [Source:MGI Symbol;Acc:MGI:1196429]
ENSMUSG00000060429	554.557	388.816	399.109	460.922	589.519	1072.09	762.703	719.821	786.032	450.851	-0.801687	0.000544037	Sntb1	syntrophin, basic 1 [Source:MGI Symbol;Acc:MGI:101781]
ENSMUSG00000064294	20.4311	14.9545	18.1413	12.5706	1.85675	5.2195	1.83122	3.39538	3.07571	16.5244	2.45333	0.000548477	Aox3	aldehyde oxidase 3 [Source:MGI Symbol;Acc:MGI:1918974]
ENSMUSG00000077192	11.6749	4.67327	5.03925	7.33285	25.0662	17.7463	32.0463	29.4267	26.0714	7.18006	-1.86269	0.000548477	Snora17	small nucleolar RNA, H/ACA box 17 [Source:MGI Symbol;Acc:MGI:4360060]
ENSMUSG00000000876	2221.15	2543.19	2455.12	2937.33	1563.39	1865.45	1899.89	1908.21	1809.23	2539.2	0.489087	0.00055353	Pxmp4	peroxisomal membrane protein 4 [Source:MGI Symbol;Acc:MGI:1891701]
ENSMUSG00000021290	4196.15	3900.31	4259.18	4225.82	5146.92	5654.81	5403.93	4821.44	5256.77	4145.36	-0.342822	0.000553866	Atp5mpl	ATP synthase membrane subunit 6.8PL [Source:MGI Symbol;Acc:MGI:1917507]
ENSMUSG00000061731	987.501	772.024	814.343	866.324	508.75	709.852	540.21	551.184	577.499	860.048	0.575116	0.000553895	Ext1	exostoses (multiple) 1 [Source:MGI Symbol;Acc:MGI:894663]
ENSMUSG00000027469	7.78326	5.60792	7.05495	8.3804	31.5648	22.9658	17.3966	27.1631	24.7726	7.20663	-1.78405	0.000554969	Tpx2	TPX2, microtubule-associated [Source:MGI Symbol;Acc:MGI:1919369]
ENSMUSG00000036941	695.629	666.408	748.833	700.811	532.888	547.004	565.847	510.439	539.044	702.92	0.381977	0.000554973	Elac1	elaC ribonuclease Z 1 [Source:MGI Symbol;Acc:MGI:1890495]
ENSMUSG00000022353	929.127	1208.51	1506.74	1203.63	1952.37	2035.6	1551.04	2364.32	1975.84	1212	-0.704864	0.000558896	Mtss1	metastasis suppressor 1 [Source:MGI Symbol;Acc:MGI:2384818]
ENSMUSG00000032599	746.22	858.947	777.053	585.58	561.668	450.965	501.754	427.818	485.551	741.95	0.611064	0.000568596	Ip6k2	inositol hexaphosphate kinase 2 [Source:MGI Symbol;Acc:MGI:1923750]
ENSMUSG00000060260	88.5346	91.5961	137.068	122.563	196.816	213.999	149.244	255.786	203.961	109.94	-0.890763	0.000570087	Pwwp2b	PWWP domain containing 2B [Source:MGI Symbol;Acc:MGI:2142008]
ENSMUSG00000087535	82.6971	52.3406	49.3847	93.2319	26.9229	17.7463	40.2868	18.1087	25.7662	69.4136	1.41759	0.000572508	Zmiz1os1	Zmiz1 opposite strand 1 [Source:MGI Symbol;Acc:MGI:3041228]
ENSMUSG00000042116	71.9952	104.681	89.6987	83.804	147.612	165.98	119.945	195.8	157.334	87.5448	-0.841382	0.000572508	Vwa1	von Willebrand factor A domain containing 1 [Source:MGI Symbol;Acc:MGI:2179729]
ENSMUSG00000028809	2370	2506.74	2799.81	2632.49	1992.3	2100.33	1997.86	2030.44	2030.23	2577.26	0.344188	0.000575553	Srrm1	serine/arginine repetitive matrix 1 [Source:MGI Symbol;Acc:MGI:1858303]
ENSMUSG00000029456	1803.77	2293.64	2241.46	2033.29	1341.5	1584.64	1643.52	1457.75	1506.85	2093.04	0.474072	0.000576108	Acad10	acyl-Coenzyme A dehydrogenase family, member 10 [Source:MGI Symbol;Acc:MGI:1919235]
ENSMUSG00000038324	3375.99	3866.66	3606.09	3592.05	2591.1	2854.02	2862.2	3002.65	2827.49	3610.2	0.35283	0.000576108	Trpc4ap	transient receptor potential cation channel, subfamily C, member 4 associated protein [Source:MGI Symbol;Acc:MGI:1930751]
ENSMUSG00000059013	832.809	1008.49	1240.66	929.177	578.378	628.428	590.568	780.938	644.578	1002.79	0.638488	0.000580582	Sh2d3c	SH2 domain containing 3C [Source:MGI Symbol;Acc:MGI:1351631]
ENSMUSG00000002109	266.577	224.317	190.484	230.461	146.683	162.848	140.088	142.606	148.057	227.96	0.623443	0.000587143	Ddb2	damage specific DNA binding protein 2 [Source:MGI Symbol;Acc:MGI:1355314]
ENSMUSG00000036371	5333.48	4784.49	4977.77	5111	4199.05	4152.63	4142.22	4143.5	4159.35	5051.69	0.280353	0.000587818	Serbp1	serpine1 mRNA binding protein 1 [Source:MGI Symbol;Acc:MGI:1914120]
ENSMUSG00000051910	2084.94	1931.93	1740.56	2013.39	1121.48	1467.72	1522.66	1048.04	1289.98	1942.7	0.590401	0.000591543	Sox6	SRY (sex determining region Y)-box 6 [Source:MGI Symbol;Acc:MGI:98368]
ENSMUSG00000035413	22.3769	35.5168	32.2512	31.4265	60.3444	66.8096	55.8522	62.2487	61.3137	30.3929	-1.01047	0.000593175	Tmem98	transmembrane protein 98 [Source:MGI Symbol;Acc:MGI:1923457]
ENSMUSG00000029309	2401.14	2884.34	2928.81	2458.6	3666.16	3727.77	3310.85	4434.37	3784.78	2668.22	-0.504063	0.000596669	Sparcl1	SPARC-like 1 [Source:MGI Symbol;Acc:MGI:108110]
ENSMUSG00000032579	515.641	663.604	624.867	733.285	868.96	1041.81	832.289	1103.5	961.64	634.349	-0.599731	0.000598666	Hemk1	HemK methyltransferase family member 1 [Source:MGI Symbol;Acc:MGI:1916786]
ENSMUSG00000028834	2236.71	183.192	5165.23	491.301	115.119	33.4048	232.565	73.5666	113.664	2019.11	4.15035	0.000604254	Trim63	tripartite motif-containing 63 [Source:MGI Symbol;Acc:MGI:2447992]
ENSMUSG00000020015	632.39	698.186	557.341	721.762	1025.86	778.749	978.787	1050.31	958.424	652.42	-0.55492	0.00060612	Cdk17	cyclin-dependent kinase 17 [Source:MGI Symbol;Acc:MGI:97517]
ENSMUSG00000028860	448.51	485.085	391.046	303.789	112.334	283.941	222.493	141.474	190.06	407.108	1.09938	0.000607129	Sytl1	synaptotagmin-like 1 [Source:MGI Symbol;Acc:MGI:1933365]
ENSMUSG00000040997	2881.75	3627.39	3287.61	3495.67	2276.38	2561.73	2148.02	2648.4	2408.63	3323.11	0.464654	0.000607129	Abhd4	abhydrolase domain containing 4 [Source:MGI Symbol;Acc:MGI:1915938]
ENSMUSG00000036611	214.04	183.192	206.609	143.514	304.507	252.624	344.269	296.53	299.483	186.839	-0.680817	0.000614408	Eepd1	endonuclease/exonuclease/phosphatase family domain containing 1 [Source:MGI Symbol;Acc:MGI:1914734]
ENSMUSG00000032265	288.954	208.428	260.025	190.654	677.715	481.238	316.801	379.151	463.726	237.015	-0.968524	0.000614622	Tent5a	terminal nucleotidyltransferase 5A [Source:MGI Symbol;Acc:MGI:2670964]
ENSMUSG00000031732	182.907	172.911	191.492	173.893	272.014	375.804	335.113	218.436	300.342	180.301	-0.737321	0.000618383	Phlpp2	PH domain and leucine rich repeat protein phosphatase 2 [Source:MGI Symbol;Acc:MGI:2444928]
ENSMUSG00000028581	236.417	181.323	284.214	200.082	1047.21	554.311	301.236	371.229	568.496	225.509	-1.3345	0.000620987	Laptm5	lysosomal-associated protein transmembrane 5 [Source:MGI Symbol;Acc:MGI:108046]
ENSMUSG00000022361	691.737	641.172	705.495	787.757	1105.7	1014.67	1167.4	827.342	1028.78	706.541	-0.543297	0.000623546	Zhx1	zinc fingers and homeoboxes 1 [Source:MGI Symbol;Acc:MGI:109271]
ENSMUSG00000028780	49.6183	33.6475	64.5024	18.8559	143.898	140.926	83.3205	81.4892	112.409	41.656	-1.43187	0.000623546	Sema3c	sema domain, immunoglobulin domain (Ig), short basic domain, secreted, (semaphorin) 3C [Source:MGI Symbol;Acc:MGI:107557]
ENSMUSG00000050796	112.857	113.093	109.856	115.23	159.681	157.629	183.122	179.955	170.097	112.759	-0.592976	0.00062732	B3galt6	UDP-Gal:betaGal beta 1,3-galactosyltransferase, polypeptide 6 [Source:MGI Symbol;Acc:MGI:2152819]
ENSMUSG00000025036	412.513	361.711	523.074	405.402	249.733	245.316	323.21	186.746	251.252	425.675	0.757986	0.000627934	Sfxn2	sideroflexin 2 [Source:MGI Symbol;Acc:MGI:2137678]
ENSMUSG00000030590	207.229	206.558	169.319	181.226	138.328	124.224	120.861	118.838	125.563	191.083	0.605391	0.000630536	Fam98c	family with sequence similarity 98, member C [Source:MGI Symbol;Acc:MGI:1921083]
ENSMUSG00000006498	1951.65	2230.08	1953.21	2108.72	1353.57	1444.76	1305.66	1767.86	1467.96	2060.92	0.490207	0.000632092	Ptbp1	polypyrimidine tract binding protein 1 [Source:MGI Symbol;Acc:MGI:97791]
ENSMUSG00000037949	1521.63	1382.35	1327.34	1681.32	1101.98	1084.61	1127.12	1120.48	1108.55	1478.16	0.414896	0.000634127	Ano10	anoctamin 10 [Source:MGI Symbol;Acc:MGI:2143103]
ENSMUSG00000026991	2340.82	3211.47	3315.83	3076.65	2010.86	1952.09	2133.37	2245.48	2085.45	2986.19	0.518007	0.000634369	Pkp4	plakophilin 4 [Source:MGI Symbol;Acc:MGI:109281]
ENSMUSG00000063450	1713.29	1523.49	1547.05	1320.96	2039.64	2606.62	2514.26	1876.52	2259.26	1526.2	-0.565945	0.000636514	Syne2	spectrin repeat containing, nuclear envelope 2 [Source:MGI Symbol;Acc:MGI:2449316]
ENSMUSG00000019362	1890.36	1809.49	2117.49	1940.06	2372.93	2412.45	2483.13	2631.42	2474.98	1939.35	-0.351795	0.000637153	D8Ertd738e	DNA segment, Chr 8, ERATO Doi 738, expressed [Source:MGI Symbol;Acc:MGI:1289231]
ENSMUSG00000026036	227.66	331.802	305.379	294.361	445.621	408.165	446.818	411.973	428.144	289.801	-0.563492	0.000637725	Nif3l1	Ngg1 interacting factor 3-like 1 (S. pombe) [Source:MGI Symbol;Acc:MGI:1929485]
ENSMUSG00000035517	1067.28	868.293	941.332	1279.06	727.847	712.984	474.286	642.859	639.494	1038.99	0.700275	0.00063929	Tdrd7	tudor domain containing 7 [Source:MGI Symbol;Acc:MGI:2140279]
ENSMUSG00000034707	4994.91	5955.61	5460.53	5993.03	3319.87	3714.2	4498.39	4290.63	3955.77	5601.02	0.501772	0.00064226	Gns	glucosamine (N-acetyl)-6-sulfatase [Source:MGI Symbol;Acc:MGI:1922862]
ENSMUSG00000048118	348.301	346.757	345.693	357.214	454.904	467.667	488.02	435.741	461.583	349.491	-0.402365	0.000644209	Arid4a	AT rich interactive domain 4A (RBP1-like) [Source:MGI Symbol;Acc:MGI:2444354]
ENSMUSG00000018340	6157.53	5904.21	5836.46	6684.42	7366.66	7565.14	8753.23	8374.15	8014.8	6145.65	-0.383134	0.000645601	Anxa6	annexin A6 [Source:MGI Symbol;Acc:MGI:88255]
ENSMUSG00000023169	12.6478	3.73861	8.0628	5.23775	66.8431	20.878	24.7215	23.7677	34.0526	7.42174	-2.20257	0.000645791	Slc38a1	solute carrier family 38, member 1 [Source:MGI Symbol;Acc:MGI:2145895]
ENSMUSG00000037022	850.321	1107.56	1078.4	1018.22	1313.65	1322.62	1460.4	1487.18	1395.96	1013.63	-0.461573	0.000647523	Mmaa	methylmalonic aciduria (cobalamin deficiency) type A [Source:MGI Symbol;Acc:MGI:1923805]
ENSMUSG00000032081	168.313	96.2693	75.5888	155.037	50.1323	70.9852	50.3585	49.799	55.3187	123.802	1.16273	0.000648585	Apoc3	apolipoprotein C-III [Source:MGI Symbol;Acc:MGI:88055]
ENSMUSG00000029922	837.673	828.103	773.021	838.04	679.571	595.023	634.518	627.014	634.031	819.209	0.369078	0.000652475	Mkrn1	makorin, ring finger protein, 1 [Source:MGI Symbol;Acc:MGI:1859353]
ENSMUSG00000001761	193.609	212.166	160.248	168.656	332.359	247.404	257.286	328.22	291.317	183.67	-0.663833	0.00065341	Smo	smoothened, frizzled class receptor [Source:MGI Symbol;Acc:MGI:108075]
ENSMUSG00000023826	302.574	295.351	265.065	253.507	140.185	205.648	143.751	202.591	173.044	279.124	0.694328	0.000661362	Prkn	parkin RBR E3 ubiquitin protein ligase [Source:MGI Symbol;Acc:MGI:1355296]
ENSMUSG00000029657	330.789	551.446	647.04	613.864	1825.19	843.471	1033.72	859.032	1140.35	535.785	-1.09027	0.000673623	Hsph1	heat shock 105kDa/110kDa protein 1 [Source:MGI Symbol;Acc:MGI:105053]
ENSMUSG00000071335	61.2932	67.2951	62.4867	74.376	115.119	96.0388	107.126	136.947	113.808	66.3628	-0.776797	0.000679035	Mfsd4b3	major facilitator superfamily domain containing 4B3 [Source:MGI Symbol;Acc:MGI:3773841]
ENSMUSG00000022822	693.683	671.081	662.158	667.289	1533.68	1007.36	920.188	912.226	1093.36	673.553	-0.699348	0.000679131	Abcc5	ATP-binding cassette, sub-family C (CFTR/MRP), member 5 [Source:MGI Symbol;Acc:MGI:1351644]
ENSMUSG00000025780	2293.14	1816.97	1664.97	1691.79	3170.4	3593.1	2584.77	2390.35	2934.66	1866.72	-0.652664	0.000679732	Itih5	inter-alpha (globulin) inhibitor H5 [Source:MGI Symbol;Acc:MGI:1925751]
ENSMUSG00000079105	169.286	175.715	140.091	152.942	80.7687	125.268	72.3332	64.5123	85.7205	159.509	0.896968	0.000680713	C7	complement component 7 [Source:MGI Symbol;Acc:MGI:88235]
ENSMUSG00000021930	511.749	446.764	463.611	518.537	608.086	621.12	706.851	723.217	664.819	485.166	-0.454456	0.000680837	Spryd7	SPRY domain containing 7 [Source:MGI Symbol;Acc:MGI:1913924]
ENSMUSG00000026185	811.405	757.07	1059.25	953.27	1504.9	1441.63	1065.77	1680.71	1423.25	895.249	-0.668693	0.000681186	Igfbp5	insulin-like growth factor binding protein 5 [Source:MGI Symbol;Acc:MGI:96440]
ENSMUSG00000027188	125.505	116.832	123.966	108.945	69.6282	78.2925	77.8268	49.799	68.8866	118.812	0.781397	0.000684913	Pamr1	peptidase domain containing associated with muscle regeneration 1 [Source:MGI Symbol;Acc:MGI:2445082]
ENSMUSG00000031603	11.6749	19.6277	16.1256	5.23775	0.928376	0	1.83122	0	0.689899	13.1665	4.16366	0.000689083	Fgf20	fibroblast growth factor 20 [Source:MGI Symbol;Acc:MGI:1891346]
ENSMUSG00000079834	729.681	684.167	555.326	742.713	974.795	986.485	911.032	900.908	943.305	677.971	-0.476611	0.000691032	Tmlhe	trimethyllysine hydroxylase, epsilon [Source:NCBI gene;Acc:192289]
ENSMUSG00000020484	2040.19	2025.39	1905.85	2149.57	1521.61	1728.7	1335.87	1479.26	1516.36	2030.25	0.421287	0.00069254	Xbp1	X-box binding protein 1 [Source:MGI Symbol;Acc:MGI:98970]
ENSMUSG00000075700	3732.07	3550.75	3408.55	3556.43	4296.52	4409.43	4446.2	4161.61	4328.44	3561.95	-0.281253	0.000693116	Selenot	selenoprotein T [Source:MGI Symbol;Acc:MGI:1916477]
ENSMUSG00000054013	493.264	362.646	300.339	486.063	634.081	723.423	589.653	947.312	723.617	410.578	-0.816946	0.000693394	Tmem179	transmembrane protein 179 [Source:MGI Symbol;Acc:MGI:2144891]
ENSMUSG00000031155	96.3178	135.525	91.7144	100.565	52.9174	66.8096	58.599	58.8533	59.2948	106.03	0.841929	0.000698796	Pim2	proviral integration site 2 [Source:MGI Symbol;Acc:MGI:97587]
ENSMUSG00000026197	723.843	625.283	586.569	605.484	421.483	448.877	451.396	511.571	458.332	635.295	0.472478	0.000700448	Zfand2b	zinc finger, AN1 type domain 2B [Source:MGI Symbol;Acc:MGI:1916068]
ENSMUSG00000058715	128.424	131.786	133.036	131.991	578.378	257.843	174.881	242.204	313.327	131.309	-1.25547	0.000700642	Fcer1g	Fc receptor, IgE, high affinity I, gamma polypeptide [Source:MGI Symbol;Acc:MGI:95496]
ENSMUSG00000025571	911.614	1079.53	1085.45	1032.88	761.268	811.11	769.112	631.541	743.258	1027.37	0.466275	0.000701706	Tnrc6c	trinucleotide repeat containing 6C [Source:MGI Symbol;Acc:MGI:2443265]
ENSMUSG00000025724	1253.1	1180.47	1142.9	1160.69	871.745	1014.67	892.72	889.59	917.181	1184.29	0.369148	0.0007085	Sec11a	SEC11 homolog A, signal peptidase complex subunit [Source:MGI Symbol;Acc:MGI:1929464]
ENSMUSG00000038463	39.8892	36.4515	42.3297	26.1887	70.5566	85.5998	58.599	74.6984	72.3635	36.2148	-0.993662	0.000713468	Olfml2b	olfactomedin-like 2B [Source:MGI Symbol;Acc:MGI:2443310]
ENSMUSG00000015340	70.0493	67.2951	80.628	60.7579	340.714	178.507	89.7298	130.156	184.777	69.6826	-1.40776	0.000714568	Cybb	cytochrome b-245, beta polypeptide [Source:MGI Symbol;Acc:MGI:88574]
ENSMUSG00000043832	30.1601	28.9743	23.1806	23.0461	224.667	67.8535	36.6244	67.9077	99.2631	26.3403	-1.91459	0.000717868	Clec4a3	C-type lectin domain family 4, member a3 [Source:MGI Symbol;Acc:MGI:1920399]
ENSMUSG00000048731	896.048	978.582	951.411	858.991	541.243	671.228	751.716	653.045	654.308	921.258	0.493828	0.000720518	Ggnbp1	gametogenetin binding protein 1 [Source:MGI Symbol;Acc:MGI:3055306]
ENSMUSG00000039988	998.203	1039.33	1085.45	1103.07	1409.27	1382.12	1508.93	1231.39	1382.93	1056.52	-0.389259	0.000723878	Ankrd13c	ankyrin repeat domain 13c [Source:MGI Symbol;Acc:MGI:2139746]
ENSMUSG00000041949	198.473	192.539	217.696	172.846	116.975	126.312	131.848	142.606	129.435	195.388	0.596562	0.000725477	Tango6	transport and golgi organization 6 [Source:MGI Symbol;Acc:MGI:2142786]
ENSMUSG00000056501	4563.91	4455.49	5846.54	4161.92	7119.72	12045.6	5772.92	9426.72	8591.23	4756.96	-0.852759	0.000725477	Cebpb	CCAAT/enhancer binding protein (C/EBP), beta [Source:MGI Symbol;Acc:MGI:88373]
ENSMUSG00000037287	685.9	642.107	664.173	678.812	538.458	531.345	431.252	464.036	491.273	667.748	0.442657	0.000731936	Tbcel	tubulin folding cofactor E-like [Source:MGI Symbol;Acc:MGI:1925543]
ENSMUSG00000039686	2028.51	2661.89	2442.02	2540.31	1595.88	1627.44	1492.44	2002.14	1679.48	2418.18	0.526375	0.000733227	Zer1	zyg-11 related, cell cycle regulator [Source:MGI Symbol;Acc:MGI:2442511]
ENSMUSG00000028597	77.8326	59.8178	82.6437	69.1383	153.182	112.741	118.114	114.311	124.587	72.3581	-0.787185	0.000738359	Gpx7	glutathione peroxidase 7 [Source:MGI Symbol;Acc:MGI:1914555]
ENSMUSG00000038147	21.404	24.301	42.3297	30.3789	207.028	58.4584	59.5146	70.1712	98.793	29.6034	-1.74223	0.000738359	Cd84	CD84 antigen [Source:MGI Symbol;Acc:MGI:1336885]
ENSMUSG00000006642	45.7267	65.4258	105.824	76.4711	27.8513	26.0975	42.1181	22.6359	29.6757	73.362	1.29738	0.000741507	Tcf23	transcription factor 23 [Source:MGI Symbol;Acc:MGI:1934960]
ENSMUSG00000041560	2436.16	2548.8	2860.28	2272.14	1664.58	1791.33	1998.78	1987.43	1860.53	2529.34	0.443227	0.000743845	Nop53	NOP53 ribosome biogenesis factor [Source:MGI Symbol;Acc:MGI:2154441]
ENSMUSG00000039789	99.2366	107.485	91.7144	77.5187	172.678	217.131	245.383	110.916	186.527	93.9887	-0.989892	0.000746773	Zfp597	zinc finger protein 597 [Source:MGI Symbol;Acc:MGI:1918313]
ENSMUSG00000056145	0.972908	2.80396	1.00785	0	26.9229	20.878	8.24049	5.65897	15.4251	1.19618	-3.66068	0.000751816	AI504432	expressed sequence AI504432 [Source:MGI Symbol;Acc:MGI:2139742]
ENSMUSG00000026321	26.2685	14.9545	10.0785	18.8559	131.829	41.756	49.4429	35.0856	64.5285	17.5393	-1.88271	0.000752962	Tnfrsf11a	tumor necrosis factor receptor superfamily, member 11a, NFKB activator [Source:MGI Symbol;Acc:MGI:1314891]
ENSMUSG00000036620	1123.71	1236.55	1457.35	1334.58	1497.47	1943.74	2065.62	2004.41	1877.81	1288.05	-0.543826	0.000753466	Mgat4b	mannoside acetylglucosaminyltransferase 4, isoenzyme B [Source:MGI Symbol;Acc:MGI:2143974]
ENSMUSG00000032470	235.444	290.677	316.465	332.073	199.601	205.648	146.498	186.746	184.623	293.665	0.670243	0.000756087	Mras	muscle and microspikes RAS [Source:MGI Symbol;Acc:MGI:1100856]
ENSMUSG00000020225	1185.97	1115.04	1182.21	1178.49	1361.93	1467.72	1471.39	1530.19	1457.81	1165.43	-0.32266	0.000756358	Tmbim4	transmembrane BAX inhibitor motif containing 4 [Source:MGI Symbol;Acc:MGI:1915462]
ENSMUSG00000058216	130.37	97.204	87.683	112.088	56.6309	49.0633	59.5146	71.303	59.128	106.836	0.856061	0.000757636	Gstp3	glutathione S-transferase pi 3 [Source:MGI Symbol;Acc:MGI:2385078]
ENSMUSG00000024539	665.469	630.891	565.404	538.441	466.045	457.228	389.134	391.601	426.002	600.051	0.494335	0.000757832	Ptpn2	protein tyrosine phosphatase, non-receptor type 2 [Source:MGI Symbol;Acc:MGI:97806]
ENSMUSG00000047735	146.909	157.956	181.413	125.706	422.411	282.897	210.59	239.94	288.96	152.996	-0.917845	0.00076198	Samd9l	sterile alpha motif domain containing 9-like [Source:MGI Symbol;Acc:MGI:1343184]
ENSMUSG00000002603	241.281	288.808	259.018	233.604	479.042	384.155	305.814	466.299	408.828	255.678	-0.675833	0.000762822	Tgfb1	transforming growth factor, beta 1 [Source:MGI Symbol;Acc:MGI:98725]
ENSMUSG00000056019	38.9163	26.1703	36.2826	37.7118	88.1957	85.5998	68.6707	49.799	73.0663	34.7703	-1.07699	0.000767176	Zfp709	zinc finger protein 709 [Source:MGI Symbol;Acc:MGI:2384299]
ENSMUSG00000078517	1034.2	1070.18	1099.56	1110.4	1294.16	1337.24	1381.66	1532.45	1386.37	1078.59	-0.36174	0.000768513	Emc1	ER membrane protein complex subunit 1 [Source:MGI Symbol;Acc:MGI:2443696]
ENSMUSG00000031683	329.816	297.22	314.449	296.457	438.194	405.033	403.784	409.71	414.18	309.485	-0.420649	0.000778318	Lsm6	LSM6 homolog, U6 small nuclear RNA and mRNA degradation associated [Source:MGI Symbol;Acc:MGI:1925901]
ENSMUSG00000032311	2751.38	2200.17	1751.64	2584.31	3315.23	4640.14	3537	3329.74	3705.53	2321.88	-0.674366	0.000778318	Nrg4	neuregulin 4 [Source:MGI Symbol;Acc:MGI:1933833]
ENSMUSG00000022371	72.9681	63.5565	55.4318	21.9985	226.524	191.034	86.0673	106.389	152.503	53.4887	-1.50973	0.000805925	Col14a1	collagen, type XIV, alpha 1 [Source:MGI Symbol;Acc:MGI:1341272]
ENSMUSG00000005045	23.3498	16.8238	28.2198	21.9985	4.64188	6.2634	7.32488	7.92256	6.53818	22.598	1.79504	0.000818816	Chd5	chromodomain helicase DNA binding protein 5 [Source:MGI Symbol;Acc:MGI:3036258]
ENSMUSG00000115230	0	0	0	0	11.1405	4.1756	5.49366	5.65897	6.61719	0	-5.18868	0.000818898	AU022793	expressed sequence AU022793 [Source:MGI Symbol;Acc:MGI:2146144]
ENSMUSG00000034006	348.301	396.293	525.09	296.457	227.452	248.448	253.624	183.351	228.219	391.535	0.777623	0.000819826	Pqlc1	PQ loop repeat containing 1 [Source:MGI Symbol;Acc:MGI:1914193]
ENSMUSG00000038489	1054.63	1094.48	1076.38	1179.54	1399.99	1317.4	1407.29	1385.32	1377.5	1101.26	-0.323305	0.000821786	Polr2l	polymerase (RNA) II (DNA directed) polypeptide L [Source:MGI Symbol;Acc:MGI:1913741]
ENSMUSG00000032245	258.793	319.652	312.434	289.124	210.741	208.78	216.084	176.56	203.041	295.001	0.536885	0.000824264	Cln6	ceroid-lipofuscinosis, neuronal 6 [Source:MGI Symbol;Acc:MGI:2159324]
ENSMUSG00000028861	1537.19	1371.14	1517.82	1420.48	1766.7	1842.48	1835.8	1818.79	1815.94	1461.66	-0.313118	0.00082879	Mrps15	mitochondrial ribosomal protein S15 [Source:MGI Symbol;Acc:MGI:1913657]
ENSMUSG00000044991	148.855	158.891	127.997	189.607	105.835	94.9949	94.3078	86.0164	95.2885	156.337	0.711384	0.000832947	Shld1	shieldin complex subunit 1 [Source:MGI Symbol;Acc:MGI:1920997]
ENSMUSG00000033308	2442	2102.97	2386.59	1640.46	1016.57	1183.78	1710.36	835.264	1186.49	2143.01	0.852536	0.000836436	Dpyd	dihydropyrimidine dehydrogenase [Source:MGI Symbol;Acc:MGI:2139667]
ENSMUSG00000022510	67.1306	35.5168	46.3611	60.7579	22.281	24.0097	16.481	4.52718	16.8247	52.4416	1.62818	0.000838363	Trp63	transformation related protein 63 [Source:MGI Symbol;Acc:MGI:1330810]
ENSMUSG00000032485	1320.24	1454.32	1519.84	1516.85	886.599	984.398	1162.82	1151.03	1046.21	1452.81	0.473876	0.000840084	Scap	SREBF chaperone [Source:MGI Symbol;Acc:MGI:2135958]
ENSMUSG00000028572	498.129	337.41	308.402	347.787	222.81	238.009	234.396	142.606	209.455	372.932	0.830477	0.000841625	Hook1	hook microtubule tethering protein 1 [Source:MGI Symbol;Acc:MGI:1925213]
ENSMUSG00000036775	2430.32	2793.68	2200.14	3437.01	1653.44	2010.55	1632.53	1845.96	1785.62	2715.29	0.604808	0.000842164	Decr2	2-4-dienoyl-Coenzyme A reductase 2, peroxisomal [Source:MGI Symbol;Acc:MGI:1347059]
ENSMUSG00000034210	830.863	770.155	756.896	862.133	1024.93	1079.39	1194.87	981.266	1070.11	805.012	-0.411447	0.000843988	Efcab14	EF-hand calcium binding domain 14 [Source:MGI Symbol;Acc:MGI:2442397]
ENSMUSG00000038497	427.106	494.432	486.792	486.063	589.519	655.569	628.108	767.357	660.138	473.598	-0.477887	0.000843988	Tmco3	transmembrane and coiled-coil domains 3 [Source:MGI Symbol;Acc:MGI:2444946]
ENSMUSG00000027452	11783.9	12585.1	14048.4	9140.92	7537.49	7847	9195.47	6636.84	7804.2	11889.6	0.607328	0.000844421	Acss1	acyl-CoA synthetase short-chain family member 1 [Source:MGI Symbol;Acc:MGI:1915988]
ENSMUSG00000032458	2482.86	3004.91	2494.43	2594.78	2133.41	2080.49	1898.97	1947.82	2015.17	2644.25	0.392033	0.000844718	Copb2	coatomer protein complex, subunit beta 2 (beta prime) [Source:MGI Symbol;Acc:MGI:1354962]
ENSMUSG00000057530	1860.2	2694.61	3048.75	2647.16	1549.46	1484.43	1513.5	1964.79	1628.05	2562.68	0.654743	0.000845629	Ece1	endothelin converting enzyme 1 [Source:MGI Symbol;Acc:MGI:1101357]
ENSMUSG00000069662	760.814	878.575	786.123	880.989	1462.19	986.485	1108.8	1393.24	1237.68	826.625	-0.582302	0.00084577	Marcks	myristoylated alanine rich protein kinase C substrate [Source:MGI Symbol;Acc:MGI:96907]
ENSMUSG00000094483	2015.86	1630.97	1600.47	1750.46	2385.93	2332.07	2820.99	2203.6	2435.65	1749.44	-0.477684	0.000846284	Purb	purine rich element binding protein B [Source:MGI Symbol;Acc:MGI:1338779]
ENSMUSG00000032089	35.9976	50.4713	49.3847	40.8544	248.805	104.39	54.9366	108.652	129.196	44.177	-1.54875	0.000849413	Il10ra	interleukin 10 receptor, alpha [Source:MGI Symbol;Acc:MGI:96538]
ENSMUSG00000040345	36.9705	34.5822	16.1256	27.2363	137.4	84.5559	45.7805	61.1169	82.2132	28.7286	-1.51611	0.000852043	Arhgap9	Rho GTPase activating protein 9 [Source:MGI Symbol;Acc:MGI:2143764]
ENSMUSG00000029538	585.69	754.266	651.071	802.423	962.726	907.149	1025.48	1134.06	1007.35	698.363	-0.528402	0.000854056	Srsf9	serine/arginine-rich splicing factor 9 [Source:MGI Symbol;Acc:MGI:104896]
ENSMUSG00000069372	117.722	3.73861	127.997	28.2838	0.928376	3.1317	6.40927	4.52718	3.74913	69.4353	4.21195	0.000857176	Ctxn3	cortexin 3 [Source:MGI Symbol;Acc:MGI:3642816]
ENSMUSG00000045636	2829.22	3000.24	3336.99	3540.72	4141.49	4810.29	3855.63	4957.26	4441.17	3176.79	-0.48327	0.000857176	Mtus1	mitochondrial tumor suppressor 1 [Source:MGI Symbol;Acc:MGI:2142572]
ENSMUSG00000018143	616.823	691.644	765.966	587.675	467.902	459.316	378.147	514.966	455.083	665.527	0.549744	0.000861151	Mafk	v-maf musculoaponeurotic fibrosarcoma oncogene family, protein K (avian) [Source:MGI Symbol;Acc:MGI:99951]
ENSMUSG00000038013	549.693	709.402	679.291	658.909	452.119	418.604	444.071	522.889	459.421	649.324	0.50004	0.000861369	Wipf2	WAS/WASL interacting protein family, member 2 [Source:MGI Symbol;Acc:MGI:1924462]
ENSMUSG00000025747	132.315	149.545	148.154	170.751	100.265	102.302	76.9112	95.0707	93.6372	150.191	0.682788	0.000863842	Tyms	thymidylate synthase [Source:MGI Symbol;Acc:MGI:98878]
ENSMUSG00000026581	16.5394	9.34654	14.1099	7.33285	93.766	51.1511	19.2278	29.4267	48.3929	11.8322	-2.03283	0.000865013	Sell	selectin, lymphocyte [Source:MGI Symbol;Acc:MGI:98279]
ENSMUSG00000043300	67.1306	71.0337	49.3847	71.2334	133.686	136.751	97.9703	98.4661	116.718	64.6956	-0.85145	0.000865582	B3galnt1	UDP-GalNAc:betaGlcNAc beta 1,3-galactosaminyltransferase, polypeptide 1 [Source:MGI Symbol;Acc:MGI:1349405]
ENSMUSG00000001131	6.81035	19.6277	10.0785	10.4755	113.262	31.317	32.0463	28.2949	51.23	11.748	-2.12444	0.000865582	Timp1	tissue inhibitor of metalloproteinase 1 [Source:MGI Symbol;Acc:MGI:98752]
ENSMUSG00000104213	2.91872	0	4.0314	1.04755	13.9256	13.5707	10.0717	22.6359	15.051	1.99942	-2.91502	0.000865582	Ighd	immunoglobulin heavy constant delta [Source:MGI Symbol;Acc:MGI:96447]
ENSMUSG00000037216	183.88	238.337	243.9	221.033	287.797	308.994	413.856	401.787	353.108	221.787	-0.670537	0.000867058	Lipt1	lipoyltransferase 1 [Source:MGI Symbol;Acc:MGI:3645211]
ENSMUSG00000031163	16.5394	12.1505	12.0942	15.7132	0	3.1317	3.66244	1.13179	1.98148	14.1243	2.82576	0.000868264	Glod5	glyoxalase domain containing 5 [Source:MGI Symbol;Acc:MGI:1917074]
ENSMUSG00000009535	1637.4	1193.55	1471.46	1004.6	755.698	846.603	964.137	812.628	844.767	1326.75	0.651236	0.000868264	Rnmt	RNA (guanine-7-) methyltransferase [Source:MGI Symbol;Acc:MGI:1915147]
ENSMUSG00000068699	3239.78	162.63	6273.87	1885.59	166.179	150.322	404.7	272.762	248.491	2890.47	3.53996	0.000874219	Flnc	filamin C, gamma [Source:MGI Symbol;Acc:MGI:95557]
ENSMUSG00000019876	0.972908	0.934654	1.00785	0	35.2783	6.2634	11.9029	5.65897	14.7759	0.728853	-4.33107	0.00087482	Pkib	protein kinase inhibitor beta, cAMP dependent, testis specific [Source:MGI Symbol;Acc:MGI:101937]
ENSMUSG00000020321	27207.4	24788.9	22706.9	27592.5	20093.8	19816.4	19739.6	20567	20054.2	25573.9	0.350772	0.000875968	Mdh1	malate dehydrogenase 1, NAD (soluble) [Source:MGI Symbol;Acc:MGI:97051]
ENSMUSG00000109901	769.57	674.82	692.393	720.714	883.814	884.183	963.222	943.916	918.784	714.374	-0.363124	0.000877831	Chmp1b	charged multivesicular body protein 1B [Source:MGI Symbol;Acc:MGI:1914314]
ENSMUSG00000035495	243.227	284.135	286.23	301.694	410.342	392.506	372.653	366.701	385.551	278.821	-0.46866	0.000877831	Tstd2	thiosulfate sulfurtransferase (rhodanese)-like domain containing 2 [Source:MGI Symbol;Acc:MGI:3039624]
ENSMUSG00000111864	0.972908	2.80396	7.05495	6.2853	14.854	24.0097	19.2278	20.3723	19.616	4.27928	-2.20887	0.000878088	Rpl26-ps6	ribosomal protein L26, pseudogene 6 [Source:MGI Symbol;Acc:MGI:3648682]
ENSMUSG00000020937	426.134	617.806	646.032	558.344	345.356	362.233	346.101	418.764	368.113	562.079	0.611691	0.000880978	Plcd3	phospholipase C, delta 3 [Source:MGI Symbol;Acc:MGI:107451]
ENSMUSG00000040667	1378.61	1331.88	1264.85	1327.25	1040.71	1053.3	1013.58	1129.53	1059.28	1325.65	0.324361	0.000882492	Nup88	nucleoporin 88 [Source:MGI Symbol;Acc:MGI:104900]
ENSMUSG00000044795	238.362	260.768	237.853	274.458	346.284	318.389	401.037	468.563	383.568	252.86	-0.600282	0.000884178	Cyb5d1	cytochrome b5 domain containing 1 [Source:MGI Symbol;Acc:MGI:2685586]
ENSMUSG00000029414	0	0	1.00785	0	32.4932	7.3073	4.57805	3.39538	11.9435	0.251963	-5.32083	0.000884178	Kntc1	kinetochore associated 1 [Source:MGI Symbol;Acc:MGI:2673709]
ENSMUSG00000061410	1177.22	1378.61	1378.74	1200.49	909.809	986.485	971.462	1035.59	975.837	1283.77	0.396323	0.0008914	Zcchc14	zinc finger, CCHC domain containing 14 [Source:MGI Symbol;Acc:MGI:2159407]
ENSMUSG00000023959	3077.31	3171.28	3200.93	2541.36	4321.59	4114.01	3632.22	4075.59	4035.85	2997.72	-0.42885	0.000900153	Clic5	chloride intracellular channel 5 [Source:MGI Symbol;Acc:MGI:1917912]
ENSMUSG00000027822	353.165	345.822	332.591	505.967	656.362	529.257	629.94	569.293	596.213	384.386	-0.63465	0.000903926	Slc33a1	solute carrier family 33 (acetyl-CoA transporter), member 1 [Source:MGI Symbol;Acc:MGI:1332247]
ENSMUSG00000042190	104.101	150.479	157.225	97.4221	285.011	201.473	199.603	217.305	225.848	127.307	-0.826734	0.000908986	Cmklr1	chemokine-like receptor 1 [Source:MGI Symbol;Acc:MGI:109603]
ENSMUSG00000055762	1490.49	1493.58	1666.98	1418.38	1149.33	1153.51	1198.53	1251.76	1188.28	1517.36	0.352986	0.000910496	Eef1d	eukaryotic translation elongation factor 1 delta (guanine nucleotide exchange protein) [Source:MGI Symbol;Acc:MGI:1913906]
ENSMUSG00000020955	531.208	439.287	556.333	522.727	631.296	782.925	700.442	740.194	713.714	512.389	-0.477908	0.000910978	Ap4s1	adaptor-related protein complex AP-4, sigma 1 [Source:MGI Symbol;Acc:MGI:1337065]
ENSMUSG00000033885	980.691	1108.5	1144.92	1130.31	763.125	796.496	797.496	922.412	819.882	1091.1	0.413081	0.000916092	Pxk	PX domain containing serine/threonine kinase [Source:MGI Symbol;Acc:MGI:1289230]
ENSMUSG00000036968	124.532	143.002	131.021	126.754	192.174	182.682	209.675	185.614	192.536	131.327	-0.552626	0.000917348	Cnpy4	canopy FGF signaling regulator 4 [Source:MGI Symbol;Acc:MGI:1913705]
ENSMUSG00000025220	1209.32	1159.91	1224.54	962.698	1982.08	1475.03	1649.93	1478.12	1646.29	1139.12	-0.53154	0.000922563	Mgea5	meningioma expressed antigen 5 (hyaluronidase) [Source:MGI Symbol;Acc:MGI:1932139]
ENSMUSG00000020354	314.249	191.604	196.531	259.792	464.188	446.789	599.724	297.662	452.091	240.544	-0.911675	0.000922563	Sgcd	sarcoglycan, delta (dystrophin-associated glycoprotein) [Source:MGI Symbol;Acc:MGI:1346525]
ENSMUSG00000024127	414.459	464.523	470.666	410.64	563.524	643.042	637.264	547.788	597.905	440.072	-0.442324	0.000924933	Prepl	prolyl endopeptidase-like [Source:MGI Symbol;Acc:MGI:2441932]
ENSMUSG00000030513	1139.27	1308.52	1423.08	1114.59	1515.11	1704.69	2182.81	1990.83	1848.36	1246.37	-0.568407	0.000926065	Pcsk6	proprotein convertase subtilisin/kexin type 6 [Source:MGI Symbol;Acc:MGI:102897]
ENSMUSG00000029452	89.5075	63.5565	66.5181	72.2809	43.6337	37.5804	30.2151	40.7446	38.0434	72.9658	0.941804	0.000927932	Tmem116	transmembrane protein 116 [Source:MGI Symbol;Acc:MGI:1924712]
ENSMUSG00000035683	0	0	0	0	21.3527	5.2195	0.91561	9.05435	9.13553	0	-5.65033	0.000927932	Melk	maternal embryonic leucine zipper kinase [Source:MGI Symbol;Acc:MGI:106924]
ENSMUSG00000020893	4805.19	6096.75	6563.12	4114.78	2710.86	4152.63	2734.01	1787.1	2846.15	5394.96	0.922566	0.000928107	Per1	period circadian clock 1 [Source:MGI Symbol;Acc:MGI:1098283]
ENSMUSG00000028443	265.604	211.232	242.892	274.458	348.141	366.409	336.029	350.856	350.359	248.546	-0.496044	0.000929846	Nudt2	nudix (nucleoside diphosphate linked moiety X)-type motif 2 [Source:MGI Symbol;Acc:MGI:1913651]
ENSMUSG00000026155	563.313	568.269	619.828	651.576	407.557	484.37	453.227	442.532	446.921	600.747	0.426747	0.000929952	Smap1	small ArfGAP 1 [Source:MGI Symbol;Acc:MGI:2138261]
ENSMUSG00000017754	545.801	741.18	669.213	770.997	1020.29	1082.52	868.914	1454.36	1106.52	681.798	-0.698028	0.000931373	Pltp	phospholipid transfer protein [Source:MGI Symbol;Acc:MGI:103151]
ENSMUSG00000042351	2.91872	1.86931	3.02355	2.0951	25.0662	10.439	8.24049	20.3723	16.0295	2.47667	-2.69415	0.00093356	Grap2	GRB2-related adaptor protein 2 [Source:MGI Symbol;Acc:MGI:1333842]
ENSMUSG00000047694	820.161	787.913	727.668	785.662	967.368	1031.37	1056.61	942.785	999.535	780.351	-0.357394	0.000935655	Yipf6	Yip1 domain family, member 6 [Source:MGI Symbol;Acc:MGI:1925179]
ENSMUSG00000034634	0	0	0	0	7.42701	9.3951	2.74683	6.79077	6.58993	0	-5.17314	0.000936212	Ly6d	lymphocyte antigen 6 complex, locus D [Source:MGI Symbol;Acc:MGI:96881]
ENSMUSG00000015755	1764.85	1652.47	1695.2	1678.17	1331.29	1208.84	1443.92	1358.15	1335.55	1697.68	0.34582	0.000944299	Tab2	TGF-beta activated kinase 1/MAP3K7 binding protein 2 [Source:MGI Symbol;Acc:MGI:1915902]
ENSMUSG00000030739	599.311	603.786	798.218	703.953	383.419	471.843	387.303	531.943	443.627	676.317	0.609716	0.000946779	Myh14	myosin, heavy polypeptide 14 [Source:MGI Symbol;Acc:MGI:1919210]
ENSMUSG00000024477	168.313	84.1188	101.793	86.9466	277.584	240.097	277.43	141.474	234.146	110.293	-1.08737	0.000946779	Pggt1b	protein geranylgeranyltransferase type I, beta subunit [Source:MGI Symbol;Acc:MGI:1917514]
ENSMUSG00000073557	1035.17	982.321	1841.34	917.654	668.431	637.823	759.956	570.424	659.159	1194.12	0.856814	0.000953828	Ppp1r12b	protein phosphatase 1, regulatory subunit 12B [Source:MGI Symbol;Acc:MGI:1916417]
ENSMUSG00000045312	57.4015	52.3406	35.2748	82.7564	285.94	89.7754	111.704	135.815	155.809	56.9433	-1.45452	0.000962167	Lhfpl2	lipoma HMGIC fusion partner-like 2 [Source:MGI Symbol;Acc:MGI:2145236]
ENSMUSG00000006932	4058.97	4518.12	4209.79	4182.87	5320.52	4978.36	5229.05	5828.74	5339.17	4242.44	-0.331569	0.000967834	Ctnnb1	catenin (cadherin associated protein), beta 1 [Source:MGI Symbol;Acc:MGI:88276]
ENSMUSG00000034194	498.129	520.602	506.949	494.443	316.576	342.399	359.835	430.082	362.223	505.031	0.481691	0.000968839	R3hcc1	R3H domain and coiled-coil containing 1 [Source:MGI Symbol;Acc:MGI:1919093]
ENSMUSG00000029267	194.582	183.192	179.397	205.32	310.078	310.038	310.392	221.832	288.085	190.623	-0.598379	0.000975735	Mtf2	metal response element binding transcription factor 2 [Source:MGI Symbol;Acc:MGI:105050]
ENSMUSG00000028978	310.358	337.41	297.316	387.593	491.111	479.15	453.227	714.162	534.413	333.169	-0.680627	0.000975735	Nos3	nitric oxide synthase 3, endothelial cell [Source:MGI Symbol;Acc:MGI:97362]
ENSMUSG00000030231	481.589	378.535	371.897	387.593	312.863	284.985	257.286	256.917	278.013	404.904	0.541835	0.000992418	Plekha5	pleckstrin homology domain containing, family A member 5 [Source:MGI Symbol;Acc:MGI:1923802]
ENSMUSG00000026303	42.8079	68.2297	65.5103	70.1858	27.8513	34.4487	18.3122	31.6902	28.0756	61.6834	1.14281	0.000993103	Mlph	melanophilin [Source:MGI Symbol;Acc:MGI:2176380]
ENSMUSG00000062647	8731.85	8341.78	8378.26	8484.11	7376.88	7255.1	7063.93	6898.29	7148.55	8484	0.247024	0.000998484	Rpl7a	ribosomal protein L7A [Source:MGI Symbol;Acc:MGI:1353472]
ENSMUSG00000051034	20.4311	61.6871	51.4004	50.2824	102.121	127.356	81.4893	108.652	104.905	45.9502	-1.18933	0.00099991	Zfp11	zinc finger protein 11 [Source:MGI Symbol;Acc:MGI:99156]
ENSMUSG00000034768	122.586	17.7584	187.46	56.5677	12.9973	16.7024	34.7932	18.1087	20.6504	96.0932	2.2149	0.00100153	Asb16	ankyrin repeat and SOCS box-containing 16 [Source:MGI Symbol;Acc:MGI:2654437]
ENSMUSG00000067928	160.53	160.76	118.926	127.801	275.728	246.36	225.24	182.219	232.387	142.004	-0.711029	0.0010039	Zfp760	zinc finger protein 760 [Source:MGI Symbol;Acc:MGI:2679257]
ENSMUSG00000024247	646.984	598.178	649.056	332.073	236.736	376.848	295.742	302.189	302.879	556.573	0.878858	0.00100396	Pkdcc	protein kinase domain containing, cytoplasmic [Source:MGI Symbol;Acc:MGI:2147077]
ENSMUSG00000049327	1375.69	1971.18	2011.67	1829.02	2541.89	2299.71	2967.49	2906.45	2678.89	1796.89	-0.57615	0.0010044	Kmt5a	lysine methyltransferase 5A [Source:MGI Symbol;Acc:MGI:1915206]
ENSMUSG00000040446	217.931	253.291	212.656	213.7	409.414	303.775	339.691	294.267	336.787	224.395	-0.586919	0.0010044	Rprd1a	regulation of nuclear pre-mRNA domain containing 1A [Source:MGI Symbol;Acc:MGI:2385066]
ENSMUSG00000027953	645.038	744.919	678.283	686.145	426.125	487.501	533.801	553.447	500.218	688.596	0.462166	0.0010085	Slc50a1	solute carrier family 50 (sugar transporter), member 1 [Source:MGI Symbol;Acc:MGI:107417]
ENSMUSG00000003228	468.941	570.139	452.525	570.915	959.013	607.55	856.095	776.411	799.767	515.63	-0.633848	0.00101826	Grk5	G protein-coupled receptor kinase 5 [Source:MGI Symbol;Acc:MGI:109161]
ENSMUSG00000037447	117.722	152.349	166.295	136.181	88.1957	92.9071	62.2615	91.6753	83.7599	143.137	0.776771	0.00102387	Arid5a	AT rich interactive domain 5A (MRF1-like) [Source:MGI Symbol;Acc:MGI:2443039]
ENSMUSG00000020143	53.5099	26.1703	39.3062	38.7593	212.598	96.0388	55.8522	89.4118	113.475	39.4364	-1.52667	0.00102402	Dock2	dedicator of cyto-kinesis 2 [Source:MGI Symbol;Acc:MGI:2149010]
ENSMUSG00000039891	739.41	405.64	1415.02	430.543	291.51	317.346	359.835	222.963	297.913	747.654	1.32691	0.00103473	Txlnb	taxilin beta [Source:MGI Symbol;Acc:MGI:2671945]
ENSMUSG00000048096	135.234	163.564	218.704	167.608	83.5538	82.4681	97.9703	124.497	97.1224	171.278	0.821139	0.00103473	Lmod1	leiomodin 1 (smooth muscle) [Source:MGI Symbol;Acc:MGI:2135671]
ENSMUSG00000046056	140.099	203.755	196.531	162.37	130.901	96.0388	90.6454	95.0707	103.164	175.689	0.766577	0.00103944	Sbsn	suprabasin [Source:MGI Symbol;Acc:MGI:2446326]
ENSMUSG00000024604	840.592	879.509	914.12	860.038	586.734	630.516	706.851	717.558	660.414	873.565	0.404112	0.00104147	Rbm22	RNA binding motif protein 22 [Source:MGI Symbol;Acc:MGI:1914060]
ENSMUSG00000042851	338.572	303.762	406.164	292.266	240.449	156.585	146.498	71.303	153.709	335.191	1.12177	0.00104329	Zc3h6	zinc finger CCCH type containing 6 [Source:MGI Symbol;Acc:MGI:1926001]
ENSMUSG00000041729	559.422	801.933	795.194	868.419	469.758	460.36	475.202	572.688	494.502	756.242	0.613389	0.00104329	Coro2b	coronin, actin binding protein, 2B [Source:MGI Symbol;Acc:MGI:2444283]
ENSMUSG00000025702	2453.67	2298.31	2143.7	2100.34	1461.26	1692.16	1899.89	1424.93	1619.56	2249.01	0.473438	0.00104464	44263	membrane-associated ring finger (C3HC4) 8 [Source:MGI Symbol;Acc:MGI:1919029]
ENSMUSG00000021096	5424.93	4796.64	4979.79	5470.3	4122.92	4202.74	4224.62	4210.27	4190.14	5167.92	0.302533	0.00104464	Ppm1a	protein phosphatase 1A, magnesium dependent, alpha isoform [Source:MGI Symbol;Acc:MGI:99878]
ENSMUSG00000026459	17.5123	3.73861	85.6673	2.0951	0	0	1.83122	2.26359	1.0237	27.2533	4.75477	0.00104686	Myog	myogenin [Source:MGI Symbol;Acc:MGI:97276]
ENSMUSG00000066366	0	0	0	0	10.2121	3.1317	8.24049	4.52718	6.52788	0	-5.1726	0.00105058	Serpina1a	serine (or cysteine) peptidase inhibitor, clade A, member 1A [Source:MGI Symbol;Acc:MGI:891971]
ENSMUSG00000038473	47.6725	48.602	21.1649	28.2838	16.7108	12.5268	9.1561	5.65897	11.0132	36.4308	1.71723	0.00105902	Nos1ap	nitric oxide synthase 1 (neuronal) adaptor protein [Source:MGI Symbol;Acc:MGI:1917979]
ENSMUSG00000079197	2292.17	2050.63	2251.54	2259.56	2593.88	2780.95	2823.74	2743.47	2735.51	2213.48	-0.305584	0.00107224	Psme2	proteasome (prosome, macropain) activator subunit 2 (PA28 beta) [Source:MGI Symbol;Acc:MGI:1096365]
ENSMUSG00000058317	504.939	399.097	443.454	504.919	315.648	330.916	335.113	350.856	333.133	463.102	0.47536	0.00108602	Ube2e2	ubiquitin-conjugating enzyme E2E 2 [Source:MGI Symbol;Acc:MGI:2384997]
ENSMUSG00000026986	368.732	383.208	296.308	306.932	457.689	567.882	494.429	451.586	492.897	338.795	-0.539942	0.00108602	Hnmt	histamine N-methyltransferase [Source:MGI Symbol;Acc:MGI:2153181]
ENSMUSG00000017677	276.306	268.246	344.685	284.934	550.527	455.14	366.244	426.686	449.649	293.542	-0.615803	0.00109714	Wsb1	WD repeat and SOCS box-containing 1 [Source:MGI Symbol;Acc:MGI:1926139]
ENSMUSG00000042349	35.9976	36.4515	30.2355	27.2363	156.896	63.6779	58.599	62.2487	85.3553	32.4802	-1.39525	0.00109912	Ikbke	inhibitor of kappaB kinase epsilon [Source:MGI Symbol;Acc:MGI:1929612]
ENSMUSG00000039148	1348.45	1328.14	1455.34	1320.96	994.291	994.837	1060.28	1174.8	1056.05	1363.22	0.368919	0.00110606	Sart1	squamous cell carcinoma antigen recognized by T cells 1 [Source:MGI Symbol;Acc:MGI:1309453]
ENSMUSG00000054405	1004.04	955.216	978.623	941.747	744.558	785.013	751.716	817.156	774.61	969.907	0.325309	0.00111222	Dnajc8	DnaJ heat shock protein family (Hsp40) member C8 [Source:MGI Symbol;Acc:MGI:1915848]
ENSMUSG00000031494	8.75617	12.1505	10.0785	4.1902	77.0552	22.9658	20.1434	29.4267	37.3978	8.79384	-2.0856	0.00111385	Cd209a	CD209a antigen [Source:MGI Symbol;Acc:MGI:2157942]
ENSMUSG00000037736	512.722	341.149	592.616	313.217	181.962	264.107	254.54	259.181	239.947	439.926	0.875359	0.00111706	Limch1	LIM and calponin homology domains 1 [Source:MGI Symbol;Acc:MGI:1924819]
ENSMUSG00000061315	6925.16	6406.12	7966.05	6543	5138.56	5344.77	5715.24	4868.98	5266.89	6960.08	0.40204	0.001127	Naca	nascent polypeptide-associated complex alpha polypeptide [Source:MGI Symbol;Acc:MGI:106095]
ENSMUSG00000028542	87.5617	101.877	66.5181	82.7564	27.8513	34.4487	8.24049	48.6672	29.8019	84.6784	1.51889	0.00112764	Slc6a9	solute carrier family 6 (neurotransmitter transporter, glycine), member 9 [Source:MGI Symbol;Acc:MGI:95760]
ENSMUSG00000043872	28.2143	42.9941	24.1884	34.5691	77.9836	91.8632	65.0083	48.6672	70.8806	32.4915	-1.12515	0.00113248	Zmym1	zinc finger, MYM domain containing 1 [Source:MGI Symbol;Acc:MGI:1915560]
ENSMUSG00000034681	1475.9	1462.73	1444.25	1413.14	906.095	971.871	1004.42	1281.19	1040.9	1449.01	0.478191	0.00113495	Rnps1	ribonucleic acid binding protein S1 [Source:MGI Symbol;Acc:MGI:97960]
ENSMUSG00000015806	2484.81	2173.07	2407.75	2597.92	1578.24	1778.81	1977.72	1903.68	1809.61	2415.89	0.41688	0.00113633	Qdpr	quinoid dihydropteridine reductase [Source:MGI Symbol;Acc:MGI:97836]
ENSMUSG00000007670	1837.82	1899.22	1974.38	1984.06	1182.75	1349.76	1236.07	1692.03	1365.15	1923.87	0.495697	0.00113913	Khsrp	KH-type splicing regulatory protein [Source:MGI Symbol;Acc:MGI:1336214]
ENSMUSG00000026426	1199.6	1241.22	1128.79	1344.01	926.519	788.144	877.154	1026.54	904.589	1228.4	0.441758	0.00113997	Arl8a	ADP-ribosylation factor-like 8A [Source:MGI Symbol;Acc:MGI:1915974]
ENSMUSG00000001493	35.0247	33.6475	31.2434	37.7118	65.9147	69.9413	50.3585	93.9389	70.0384	34.4068	-1.01994	0.00113997	Meox1	mesenchyme homeobox 1 [Source:MGI Symbol;Acc:MGI:103220]
ENSMUSG00000066684	0	0	1.00785	1.04755	13.9256	11.4829	4.57805	18.1087	12.0238	0.51385	-4.59137	0.00114106	Pilrb1	paired immunoglobin-like type 2 receptor beta 1 [Source:MGI Symbol;Acc:MGI:2450532]
ENSMUSG00000044627	3698.02	3286.24	3586.94	3627.66	4092.28	4903.2	4739.2	4440.03	4543.68	3549.72	-0.356177	0.00114667	Swi5	SWI5 recombination repair homolog (yeast) [Source:MGI Symbol;Acc:MGI:1920181]
ENSMUSG00000033576	985.555	1001.95	1067.31	902.988	1709.14	1704.69	1785.44	1043.51	1560.7	989.451	-0.657915	0.00115032	Apol6	apolipoprotein L 6 [Source:MGI Symbol;Acc:MGI:1919189]
ENSMUSG00000001436	1039.07	1028.12	900.01	1112.5	537.53	615.901	872.576	632.673	664.67	1019.92	0.617236	0.00116047	Slc19a1	solute carrier family 19 (folate transporter), member 1 [Source:MGI Symbol;Acc:MGI:103182]
ENSMUSG00000022885	113.83	207.493	213.664	180.179	285.011	288.116	313.139	316.902	300.792	178.792	-0.75037	0.00116047	St6gal1	beta galactoside alpha 2,6 sialyltransferase 1 [Source:MGI Symbol;Acc:MGI:108470]
ENSMUSG00000039231	185.825	187.865	179.397	167.608	142.042	114.829	110.789	96.2025	115.965	180.174	0.632389	0.00116089	Suv39h1	suppressor of variegation 3-9 1 [Source:MGI Symbol;Acc:MGI:1099440]
ENSMUSG00000066613	87.5617	105.616	88.6908	137.229	220.954	156.585	183.122	159.583	180.061	104.774	-0.784607	0.00116089	Zfp932	zinc finger protein 932 [Source:MGI Symbol;Acc:MGI:1916754]
ENSMUSG00000029916	364.84	401.901	285.222	345.691	503.18	470.799	500.839	499.121	493.485	349.414	-0.497409	0.00117203	Agk	acylglycerol kinase [Source:MGI Symbol;Acc:MGI:1917173]
ENSMUSG00000048163	35.0247	39.2555	50.3925	23.0461	284.083	106.478	48.5273	79.2256	129.578	36.9297	-1.81144	0.00117995	Selplg	selectin, platelet (p-selectin) ligand [Source:MGI Symbol;Acc:MGI:106689]
ENSMUSG00000034345	1129.55	1031.86	1173.14	1086.31	1302.51	1459.37	1474.13	1387.58	1405.9	1105.21	-0.347272	0.00118232	Gtf2h5	general transcription factor IIH, polypeptide 5 [Source:MGI Symbol;Acc:MGI:107227]
ENSMUSG00000023259	67.1306	130.852	111.871	128.849	281.298	146.146	217	221.832	216.569	109.676	-0.982787	0.0011849	Slc26a6	solute carrier family 26, member 6 [Source:MGI Symbol;Acc:MGI:2159728]
ENSMUSG00000027882	724.816	653.323	665.181	607.579	533.816	480.194	498.092	407.446	479.887	662.725	0.464328	0.00119893	Stxbp3	syntaxin binding protein 3 [Source:MGI Symbol;Acc:MGI:107362]
ENSMUSG00000039883	10.702	1.86931	4.0314	1.04755	40.8485	31.317	11.9029	19.2405	25.8272	4.41256	-2.54436	0.00119942	Lrrc17	leucine rich repeat containing 17 [Source:MGI Symbol;Acc:MGI:1921761]
ENSMUSG00000036764	214.04	233.663	186.452	174.941	127.188	153.453	116.282	124.497	130.355	202.274	0.636481	0.00120872	Dnajc12	DnaJ heat shock protein family (Hsp40) member C12 [Source:MGI Symbol;Acc:MGI:1353428]
ENSMUSG00000059713	390.136	477.608	383.991	461.969	285.011	311.082	217.915	316.902	282.728	428.426	0.601755	0.00121622	Rcan3	regulator of calcineurin 3 [Source:MGI Symbol;Acc:MGI:1858220]
ENSMUSG00000034111	222.796	200.951	167.303	206.367	323.075	333.004	353.425	235.413	311.229	199.354	-0.644307	0.00121629	Tmed8	transmembrane p24 trafficking protein 8 [Source:MGI Symbol;Acc:MGI:1923480]
ENSMUSG00000009079	4554.18	4862.07	4747.98	4505.51	3331.94	3910.45	3841.9	3796.04	3720.08	4667.44	0.327467	0.00121911	Ewsr1	Ewing sarcoma breakpoint region 1 [Source:MGI Symbol;Acc:MGI:99960]
ENSMUSG00000026170	1491.47	1872.11	1891.74	1663.51	1161.4	1373.77	1278.19	1307.22	1280.15	1729.71	0.434551	0.00122359	Cyp27a1	cytochrome P450, family 27, subfamily a, polypeptide 1 [Source:MGI Symbol;Acc:MGI:88594]
ENSMUSG00000025034	298.683	378.535	335.614	377.118	469.758	477.062	522.813	734.535	551.042	347.487	-0.664053	0.00122359	Trim8	tripartite motif-containing 8 [Source:MGI Symbol;Acc:MGI:1933302]
ENSMUSG00000038539	12520.3	15937.7	12843	18448.4	9371.96	7932.6	4200.82	10003.9	7877.33	14937.4	0.923194	0.00122786	Atf5	activating transcription factor 5 [Source:MGI Symbol;Acc:MGI:2141857]
ENSMUSG00000032251	338.572	308.436	311.426	361.405	220.954	238.009	262.78	218.436	235.045	329.96	0.487456	0.00122956	Irak1bp1	interleukin-1 receptor-associated kinase 1 binding protein 1 [Source:MGI Symbol;Acc:MGI:1929475]
ENSMUSG00000074781	698.548	743.984	719.605	921.844	1059.28	981.266	1060.28	1171.41	1068.06	770.995	-0.470383	0.00122956	Ube2n	ubiquitin-conjugating enzyme E2N [Source:MGI Symbol;Acc:MGI:1934835]
ENSMUSG00000034021	453.375	385.077	341.661	397.021	730.632	612.769	631.771	458.377	608.387	394.284	-0.626797	0.00122956	Pds5b	PDS5 cohesin associated factor B [Source:MGI Symbol;Acc:MGI:2140945]
ENSMUSG00000035860	33.0789	14.0198	17.1335	23.0461	4.64188	8.3512	2.74683	5.65897	5.34972	21.8196	2.04383	0.00123662	Cdhr3	cadherin-related family member 3 [Source:MGI Symbol;Acc:MGI:1916014]
ENSMUSG00000045078	1154.84	1151.49	1135.85	1089.45	826.255	840.339	942.163	947.312	889.017	1132.91	0.350185	0.00123723	Rnf216	ring finger protein 216 [Source:MGI Symbol;Acc:MGI:1344349]
ENSMUSG00000032116	1856.31	2425.43	1969.34	2119.19	1639.51	1495.91	1575.76	1567.54	1569.68	2092.57	0.414797	0.0012382	Stt3a	STT3, subunit of the oligosaccharyltransferase complex, homolog A (S. cerevisiae) [Source:MGI Symbol;Acc:MGI:105124]
ENSMUSG00000034487	66.1577	87.8575	99.7772	79.6138	147.612	140.926	137.341	118.838	136.18	83.3515	-0.71025	0.0012382	Kdelc2	KDEL (Lys-Asp-Glu-Leu) containing 2 [Source:MGI Symbol;Acc:MGI:1923765]
ENSMUSG00000045374	1046.85	1080.46	905.05	930.224	730.632	597.111	712.344	805.838	711.481	990.646	0.478085	0.00124286	Wdr81	WD repeat domain 81 [Source:MGI Symbol;Acc:MGI:2681828]
ENSMUSG00000027379	0	0	0	0	10.2121	5.2195	3.66244	5.65897	6.18826	0	-5.08912	0.00124952	Bub1	BUB1, mitotic checkpoint serine/threonine kinase [Source:MGI Symbol;Acc:MGI:1100510]
ENSMUSG00000039356	310.358	292.547	257.002	311.122	209.813	227.57	188.616	198.064	206.016	292.757	0.507469	0.00125797	Exosc2	exosome component 2 [Source:MGI Symbol;Acc:MGI:2385133]
ENSMUSG00000039531	149.828	171.976	167.303	150.847	231.166	258.887	228.902	207.118	231.518	159.989	-0.533156	0.00126232	Zup1	zinc finger containing ubiquitin peptidase 1 [Source:MGI Symbol;Acc:MGI:1919830]
ENSMUSG00000024965	94.372	74.7723	79.6202	92.1844	224.667	130.487	116.282	165.242	159.17	85.2372	-0.902076	0.00126287	Fermt3	fermitin family member 3 [Source:MGI Symbol;Acc:MGI:2147790]
ENSMUSG00000019715	965.124	890.725	919.16	914.511	635.009	756.827	659.239	762.829	703.476	922.38	0.392157	0.00127221	Gle1	GLE1 RNA export mediator (yeast) [Source:MGI Symbol;Acc:MGI:1921662]
ENSMUSG00000038002	704.385	695.382	655.103	607.579	848.536	916.544	866.167	812.628	860.969	665.612	-0.370952	0.00127548	Cramp1l	cramped chromatin regulator homolog 1 [Source:MGI Symbol;Acc:MGI:1930190]
ENSMUSG00000054733	1727.88	1645.93	1605.51	2064.72	1205.03	1242.24	1421.03	1316.28	1296.14	1761.01	0.441918	0.00127558	Msra	methionine sulfoxide reductase A [Source:MGI Symbol;Acc:MGI:106916]
ENSMUSG00000025025	852.267	1045.88	967.536	864.229	557.954	664.964	685.792	749.248	664.489	932.477	0.489897	0.00127623	Mxi1	MAX interactor 1, dimerization protein [Source:MGI Symbol;Acc:MGI:97245]
ENSMUSG00000039253	741.356	874.836	880.861	810.804	600.659	680.623	566.763	629.278	619.331	826.964	0.417951	0.00127835	Fn3krp	fructosamine 3 kinase related protein [Source:MGI Symbol;Acc:MGI:2679256]
ENSMUSG00000037348	65.1848	57.0139	57.4475	68.0907	104.907	137.795	79.6581	129.025	112.846	61.9342	-0.86232	0.00127835	Paqr7	progestin and adipoQ receptor family member VII [Source:MGI Symbol;Acc:MGI:1919154]
ENSMUSG00000047731	2470.21	2520.76	3732.07	2188.33	1626.51	2019.95	1672.82	1514.34	1708.41	2727.84	0.675094	0.00128042	Wbp1l	WW domain binding protein 1 like [Source:MGI Symbol;Acc:MGI:107577]
ENSMUSG00000015085	184.852	194.408	192.499	163.418	112.334	133.619	115.367	133.552	123.718	183.794	0.575156	0.00128042	Entpd2	ectonucleoside triphosphate diphosphohydrolase 2 [Source:MGI Symbol;Acc:MGI:1096863]
ENSMUSG00000030410	963.178	819.691	1020.95	824.422	598.803	650.35	641.843	737.93	657.231	907.061	0.465662	0.00128042	Dmwd	dystrophia myotonica-containing WD repeat motif [Source:MGI Symbol;Acc:MGI:94907]
ENSMUSG00000023170	755.949	716.879	846.594	693.478	464.188	497.94	472.455	646.255	520.209	753.225	0.535606	0.00128115	Gps2	G protein pathway suppressor 2 [Source:MGI Symbol;Acc:MGI:1891751]
ENSMUSG00000011256	69.0764	72.903	41.3219	65.9956	194.959	111.697	81.4893	164.11	138.064	62.3242	-1.14591	0.00128115	Adam19	a disintegrin and metallopeptidase domain 19 (meltrin beta) [Source:MGI Symbol;Acc:MGI:105377]
ENSMUSG00000054675	10.702	10.2812	12.0942	12.5706	38.9918	33.4048	18.3122	38.481	32.2974	11.412	-1.49882	0.00128277	Tmem119	transmembrane protein 119 [Source:MGI Symbol;Acc:MGI:2385228]
ENSMUSG00000046324	2858.4	2731.99	2520.63	2705.82	1918.95	2288.23	2091.25	1689.77	1997.05	2704.21	0.437154	0.00128745	Ermp1	endoplasmic reticulum metallopeptidase 1 [Source:MGI Symbol;Acc:MGI:106250]
ENSMUSG00000079243	395	32.7129	928.23	137.229	20.4243	12.5268	54.9366	31.6902	29.8945	373.293	3.64142	0.00129343	Xirp1	xin actin-binding repeat containing 1 [Source:MGI Symbol;Acc:MGI:1333878]
ENSMUSG00000002111	52.537	66.3604	50.3925	40.8544	300.794	100.214	79.6581	110.916	147.896	52.5361	-1.49335	0.00129343	Spi1	spleen focus forming virus (SFFV) proviral integration oncogene [Source:MGI Symbol;Acc:MGI:98282]
ENSMUSG00000026437	155.665	184.127	261.033	232.556	87.2674	120.048	97.0546	150.529	113.725	208.345	0.877065	0.00129896	Cdk18	cyclin-dependent kinase 18 [Source:MGI Symbol;Acc:MGI:97518]
ENSMUSG00000108414	693.683	481.347	445.47	433.686	311.934	346.575	319.548	335.011	328.267	513.546	0.646404	0.00130778	Snhg1	small nucleolar RNA host gene 1 [Source:MGI Symbol;Acc:MGI:3763743]
ENSMUSG00000036850	1585.84	1216.92	1309.2	1185.83	931.161	1031.37	971.462	916.753	962.687	1324.45	0.460308	0.00130884	Mrpl41	mitochondrial ribosomal protein L41 [Source:MGI Symbol;Acc:MGI:1333816]
ENSMUSG00000063952	1453.52	1511.34	1418.05	1727.41	952.514	1014.67	1292.84	1103.5	1090.88	1527.58	0.485467	0.00131394	Brpf3	bromodomain and PHD finger containing, 3 [Source:MGI Symbol;Acc:MGI:2146836]
ENSMUSG00000107283	754.003	695.382	648.048	692.43	828.111	890.447	1005.34	982.397	926.574	697.466	-0.409419	0.00131668	Mpv17	MpV17 mitochondrial inner membrane protein [Source:MGI Symbol;Acc:MGI:97138]
ENSMUSG00000016559	5021.18	4470.45	4794.34	4262.48	3829.55	3394.76	2822.83	3540.25	3396.85	4637.11	0.449134	0.00132208	H3f3b	H3 histone, family 3B [Source:MGI Symbol;Acc:MGI:1101768]
ENSMUSG00000032776	32.1059	31.7782	34.2669	26.1887	12.9973	10.439	13.7341	12.4497	12.405	31.085	1.32242	0.00132553	Mctp2	multiple C2 domains, transmembrane 2 [Source:MGI Symbol;Acc:MGI:2685335]
ENSMUSG00000032459	489.373	500.974	466.635	542.631	697.21	595.023	663.817	773.016	682.267	499.903	-0.448396	0.00133128	Mrps22	mitochondrial ribosomal protein S22 [Source:MGI Symbol;Acc:MGI:1928137]
ENSMUSG00000008575	1427.26	1393.57	1575.27	1231.92	1842.83	1996.98	1905.38	1713.54	1864.68	1407	-0.406346	0.0013331	Nfib	nuclear factor I/B [Source:MGI Symbol;Acc:MGI:103188]
ENSMUSG00000026834	1361.1	936.523	927.222	1099.93	2085.13	1863.36	2707.46	1201.97	1964.48	1081.19	-0.861866	0.00134432	Acvr1c	activin A receptor, type IC [Source:MGI Symbol;Acc:MGI:2661081]
ENSMUSG00000022639	58.3745	66.3604	64.5024	67.0432	143.898	108.566	88.8142	105.257	111.634	64.0701	-0.802295	0.00134471	Dubr	Dppa2 upstream binding RNA [Source:MGI Symbol;Acc:MGI:1915440]
ENSMUSG00000045259	44.7537	19.6277	23.1806	34.5691	0	8.3512	9.1561	0	4.37682	30.5328	2.78774	0.00134594	Klhdc9	kelch domain containing 9 [Source:MGI Symbol;Acc:MGI:1916124]
ENSMUSG00000030789	1.94582	7.47723	12.0942	2.0951	59.4161	16.7024	15.5654	38.481	32.5412	5.90309	-2.4604	0.00135604	Itgax	integrin alpha X [Source:MGI Symbol;Acc:MGI:96609]
ENSMUSG00000061132	16.5394	11.2158	12.0942	8.3804	57.5593	28.1853	22.8902	37.3492	36.496	12.0575	-1.59603	0.00135668	Blnk	B cell linker [Source:MGI Symbol;Acc:MGI:96878]
ENSMUSG00000032601	931.073	888.856	1057.24	1010.89	779.836	723.423	769.112	733.403	751.443	972.012	0.37044	0.00135884	Prkar2a	protein kinase, cAMP dependent regulatory, type II alpha [Source:MGI Symbol;Acc:MGI:108025]
ENSMUSG00000024480	2020.73	2271.21	2000.58	2504.69	3268.81	2637.94	3120.4	2915.5	2985.66	2199.3	-0.441254	0.00135884	Ap3s1	adaptor-related protein complex 3, sigma 1 subunit [Source:MGI Symbol;Acc:MGI:1337062]
ENSMUSG00000021760	1489.52	2071.19	2214.25	2350.7	2437.92	3393.72	3434.45	3527.8	3198.47	2031.42	-0.654878	0.00135884	Gpx8	glutathione peroxidase 8 (putative) [Source:MGI Symbol;Acc:MGI:1916840]
ENSMUSG00000022246	203.338	192.539	185.444	205.32	138.328	134.663	144.666	101.861	129.88	196.66	0.593884	0.00136653	Rai14	retinoic acid induced 14 [Source:MGI Symbol;Acc:MGI:1922896]
ENSMUSG00000043085	90.4804	160.76	90.7065	166.56	25.9945	8.3512	78.7424	24.8995	34.4969	127.127	1.87491	0.00136989	Tmem82	transmembrane protein 82 [Source:MGI Symbol;Acc:MGI:2384869]
ENSMUSG00000029438	795.838	1088.87	1159.03	944.89	727.847	745.345	638.18	586.269	674.41	997.157	0.563887	0.00137092	Bcl7a	B cell CLL/lymphoma 7A [Source:MGI Symbol;Acc:MGI:1924295]
ENSMUSG00000027957	720.925	552.38	602.695	639.005	955.299	921.764	873.492	756.039	876.648	628.751	-0.480261	0.00137092	Slc35a3	solute carrier family 35 (UDP-N-acetylglucosamine (UDP-GlcNAc) transporter), member 3 [Source:MGI Symbol;Acc:MGI:1917648]
ENSMUSG00000028864	5.83745	4.67327	5.03925	8.3804	19.4959	16.7024	23.8059	21.5041	20.3771	5.98259	-1.7768	0.00137092	Hgf	hepatocyte growth factor [Source:MGI Symbol;Acc:MGI:96079]
ENSMUSG00000029186	979.718	815.018	810.312	738.523	554.241	681.667	557.606	590.797	596.078	835.893	0.488641	0.00137153	Pi4k2b	phosphatidylinositol 4-kinase type 2 beta [Source:MGI Symbol;Acc:MGI:1914323]
ENSMUSG00000036613	202.365	216.84	202.578	196.939	263.659	278.721	279.261	314.639	284.07	204.68	-0.470494	0.00137941	Eipr1	EARP complex and GARP complex interacting protein 1 [Source:MGI Symbol;Acc:MGI:1289332]
ENSMUSG00000012640	524.397	456.111	415.234	437.876	741.773	693.15	684.876	530.812	662.652	458.405	-0.532398	0.00138126	Zfp715	zinc finger protein 715 [Source:MGI Symbol;Acc:MGI:1917180]
ENSMUSG00000074677	3.89163	0	2.0157	2.0951	38.0634	26.0975	6.40927	6.79077	19.3402	2.00061	-3.28448	0.00138126	Sirpb1c	signal-regulatory protein beta 1C [Source:MGI Symbol;Acc:MGI:3807521]
ENSMUSG00000034723	866.861	758.004	725.652	864.229	1241.24	1129.5	1180.22	928.071	1119.76	803.686	-0.479334	0.00138364	Tmx4	thioredoxin-related transmembrane protein 4 [Source:MGI Symbol;Acc:MGI:106558]
ENSMUSG00000035355	0.972908	1.86931	0	1.04755	8.35538	9.3951	12.8185	12.4497	10.7547	0.972441	-3.44648	0.00139888	Kcnh4	potassium voltage-gated channel, subfamily H (eag-related), member 4 [Source:MGI Symbol;Acc:MGI:2156184]
ENSMUSG00000021311	867.834	765.481	753.872	762.616	604.373	558.486	548.45	372.36	520.917	787.451	0.594754	0.00140264	Mtr	5-methyltetrahydrofolate-homocysteine methyltransferase [Source:MGI Symbol;Acc:MGI:894292]
ENSMUSG00000024190	429.052	805.672	654.095	365.595	1618.16	1209.88	658.323	1342.31	1207.17	563.603	-1.09848	0.00140773	Dusp1	dual specificity phosphatase 1 [Source:MGI Symbol;Acc:MGI:105120]
ENSMUSG00000032330	8506.13	7592.19	7617.33	7779.1	9390.52	9658.16	10073.5	9335.04	9614.32	7873.69	-0.288179	0.00141369	Cox7a2	cytochrome c oxidase subunit 7A2 [Source:MGI Symbol;Acc:MGI:1316715]
ENSMUSG00000008845	844.484	818.757	543.231	762.616	381.563	573.101	395.543	247.863	399.518	742.272	0.89335	0.0014183	Cd163	CD163 antigen [Source:MGI Symbol;Acc:MGI:2135946]
ENSMUSG00000028559	5490.12	4488.21	4954.59	5362.41	3799.84	3951.16	4057.98	3159.97	3742.24	5073.83	0.438937	0.00141947	Osbpl9	oxysterol binding protein-like 9 [Source:MGI Symbol;Acc:MGI:1923784]
ENSMUSG00000007216	191.663	237.402	218.704	201.13	141.113	137.795	162.979	114.311	139.049	212.224	0.606663	0.00142272	Zfp775	zinc finger protein 775 [Source:MGI Symbol;Acc:MGI:2683557]
ENSMUSG00000029173	788.055	603.786	618.82	627.482	805.83	1038.68	1098.73	899.777	960.755	659.536	-0.54275	0.00142409	Sepsecs	Sep (O-phosphoserine) tRNA:Sec (selenocysteine) tRNA synthase [Source:MGI Symbol;Acc:MGI:1098791]
ENSMUSG00000027635	130.37	75.707	99.7772	97.4221	53.8458	66.8096	37.54	49.799	51.9986	100.819	0.957769	0.00142465	Dsn1	DSN1 homolog, MIS12 kinetochore complex component [Source:MGI Symbol;Acc:MGI:1914184]
ENSMUSG00000022865	811.405	873.901	899.003	884.132	1585.67	1218.23	1099.65	1098.97	1250.63	867.11	-0.528822	0.00142465	Cxadr	coxsackie virus and adenovirus receptor [Source:MGI Symbol;Acc:MGI:1201679]
ENSMUSG00000033526	2811.7	2646.94	2628.47	3423.39	3629.95	3898.97	3815.35	4188.77	3883.26	2877.63	-0.432405	0.00142495	Ppip5k1	diphosphoinositol pentakisphosphate kinase 1 [Source:MGI Symbol;Acc:MGI:2443281]
ENSMUSG00000035757	840.592	884.182	822.406	796.138	492.968	659.745	621.699	656.441	607.713	835.83	0.461064	0.00142806	Selenoo	selenoprotein O [Source:MGI Symbol;Acc:MGI:1919007]
ENSMUSG00000031379	492.291	522.471	405.156	505.967	309.149	306.907	141.92	296.53	263.626	481.471	0.870353	0.00143205	Pir	pirin [Source:MGI Symbol;Acc:MGI:1916906]
ENSMUSG00000027304	872.698	775.763	877.838	787.757	643.365	615.901	645.505	676.813	645.396	828.514	0.360577	0.00143338	Rtf1	RTF1, Paf1/RNA polymerase II complex component [Source:MGI Symbol;Acc:MGI:1309480]
ENSMUSG00000024966	1144.14	1301.04	1213.45	1279.06	2146.41	1514.7	1580.34	1722.59	1741.01	1234.42	-0.49629	0.00143453	Stip1	stress-induced phosphoprotein 1 [Source:MGI Symbol;Acc:MGI:109130]
ENSMUSG00000052374	2112.18	301.893	4904.2	711.286	138.328	115.873	368.991	271.631	223.706	2007.39	3.16558	0.0014374	Actn2	actinin alpha 2 [Source:MGI Symbol;Acc:MGI:109192]
ENSMUSG00000085286	57.4015	70.099	46.3611	30.3789	24.1378	16.7024	20.1434	23.7677	21.1878	51.0602	1.2725	0.0014374	Ube4bos3	ubiquitination factor E4B, opposite strand 3 [Source:MGI Symbol;Acc:MGI:1921560]
ENSMUSG00000009291	3770.02	4397.55	4330.73	4280.29	3167.62	3456.35	3461.92	3286.73	3343.16	4194.65	0.327329	0.0014374	Pttg1ip	pituitary tumor-transforming 1 interacting protein [Source:MGI Symbol;Acc:MGI:2652132]
ENSMUSG00000034853	3408.1	3504.02	3816.73	6160.64	7556.05	8831.39	4995.57	11993.6	8344.16	4222.37	-0.982696	0.00144487	Acot11	acyl-CoA thioesterase 11 [Source:MGI Symbol;Acc:MGI:1913736]
ENSMUSG00000039396	0	0	0	0	10.2121	13.5707	1.83122	3.39538	7.25236	0	-5.31566	0.00144781	Neil3	nei like 3 (E. coli) [Source:MGI Symbol;Acc:MGI:2384588]
ENSMUSG00000019802	2309.68	2131.95	2027.8	2140.14	1588.45	1751.66	1763.46	1389.84	1623.36	2152.39	0.406576	0.00144796	Sec63	SEC63-like (S. cerevisiae) [Source:MGI Symbol;Acc:MGI:2155302]
ENSMUSG00000036676	370.678	301.893	297.316	318.455	525.461	550.135	594.231	357.647	506.868	322.085	-0.655422	0.00144796	Tmtc3	transmembrane and tetratricopeptide repeat containing 3 [Source:MGI Symbol;Acc:MGI:3036255]
ENSMUSG00000020051	10.702	14.9545	12.0942	5.23775	0.928376	0	0.91561	0	0.460996	10.7471	4.43762	0.00145417	Pah	phenylalanine hydroxylase [Source:MGI Symbol;Acc:MGI:97473]
ENSMUSG00000028772	355.111	377.6	396.085	400.164	494.824	473.931	515.488	508.176	498.105	382.24	-0.382605	0.00145417	Zcchc17	zinc finger, CCHC domain containing 17 [Source:MGI Symbol;Acc:MGI:1919955]
ENSMUSG00000028251	231.552	263.572	257.002	263.983	372.279	365.365	303.067	422.159	365.717	254.027	-0.52406	0.00145611	Tstd3	thiosulfate sulfurtransferase (rhodanese)-like domain containing 3 [Source:MGI Symbol;Acc:MGI:1924282]
ENSMUSG00000004771	1081.87	1125.32	1095.53	1222.49	1411.13	1353.94	1407.29	1470.2	1410.64	1131.31	-0.318448	0.0014639	Rab11a	RAB11A, member RAS oncogene family [Source:MGI Symbol;Acc:MGI:1858202]
ENSMUSG00000029338	281.17	212.166	232.813	251.412	379.706	384.155	307.645	345.197	354.176	244.391	-0.535341	0.0014639	Antxr2	anthrax toxin receptor 2 [Source:MGI Symbol;Acc:MGI:1919164]
ENSMUSG00000063458	230.579	219.644	201.57	211.605	139.256	176.419	130.017	113.179	139.718	215.849	0.627194	0.00146893	Lrmda	leucine rich melanocyte differentiation associated [Source:MGI Symbol;Acc:MGI:1923883]
ENSMUSG00000033502	209.175	149.545	188.468	162.37	96.5511	108.566	131.848	105.257	110.555	177.389	0.680612	0.00147049	Cdc14a	CDC14 cell division cycle 14A [Source:MGI Symbol;Acc:MGI:2442676]
ENSMUSG00000073421	403.757	280.396	435.391	116.278	950.657	733.862	567.678	632.673	721.217	308.956	-1.22281	0.0014822	H2-Ab1	histocompatibility 2, class II antigen A, beta 1 [Source:MGI Symbol;Acc:MGI:103070]
ENSMUSG00000057335	324.951	232.729	182.421	201.13	443.764	477.062	442.24	294.267	414.333	235.308	-0.816463	0.00148738	Cep170	centrosomal protein 170 [Source:MGI Symbol;Acc:MGI:1918348]
ENSMUSG00000024991	6707.22	5130.31	5142.05	5688.2	3923.32	4187.08	4490.15	3265.23	3966.44	5666.95	0.514566	0.00148778	Eif3a	eukaryotic translation initiation factor 3, subunit A [Source:MGI Symbol;Acc:MGI:95301]
ENSMUSG00000048833	1171.38	1172.99	1114.68	1205.73	1412.99	1375.86	1468.64	1443.04	1425.13	1166.2	-0.289409	0.00148778	Slc39a9	solute carrier family 39 (zinc transporter), member 9 [Source:MGI Symbol;Acc:MGI:1914820]
ENSMUSG00000037010	4.86454	2.80396	24.1884	15.7132	194.959	54.2828	32.0463	131.288	103.144	11.8925	-3.12038	0.00149429	Apln	apelin [Source:MGI Symbol;Acc:MGI:1353624]
ENSMUSG00000030110	14.5936	11.2158	26.2041	19.9034	51.0607	54.2828	32.0463	41.8764	44.8166	17.9793	-1.32227	0.00149493	Ret	ret proto-oncogene [Source:MGI Symbol;Acc:MGI:97902]
ENSMUSG00000051166	238.362	153.283	146.138	155.037	317.505	317.346	423.012	216.173	318.509	173.205	-0.880044	0.00149569	Eml5	echinoderm microtubule associated protein like 5 [Source:MGI Symbol;Acc:MGI:2442513]
ENSMUSG00000042210	113.83	146.741	122.958	135.134	163.394	198.341	246.299	215.041	205.769	129.666	-0.665751	0.00149754	Abhd14a	abhydrolase domain containing 14A [Source:MGI Symbol;Acc:MGI:1915894]
ENSMUSG00000031807	4309.98	4428.39	4598.82	4117.92	2300.52	2985.55	3754.92	2869.1	2977.52	4363.78	0.551416	0.0015022	Pgls	6-phosphogluconolactonase [Source:MGI Symbol;Acc:MGI:1913421]
ENSMUSG00000049112	1.94582	0.934654	2.0157	0	14.854	7.3073	6.40927	23.7677	13.0846	1.22404	-3.40003	0.00150311	Oxtr	oxytocin receptor [Source:MGI Symbol;Acc:MGI:109147]
ENSMUSG00000039599	682.981	769.22	763.951	717.572	900.525	909.237	1012.66	929.203	937.907	733.431	-0.354964	0.00151068	Fam149b	family with sequence similarity 149, member B [Source:MGI Symbol;Acc:MGI:2145567]
ENSMUSG00000025791	4504.56	4334.92	4571.61	5167.56	5763.36	5866.72	5772.92	6898.29	6075.32	4644.66	-0.387324	0.00151104	Pgm2	phosphoglucomutase 2 [Source:MGI Symbol;Acc:MGI:97565]
ENSMUSG00000021750	216.958	251.422	224.751	207.415	139.256	126.312	153.822	64.5123	120.976	225.136	0.891503	0.00151272	Fam107a	family with sequence similarity 107, member A [Source:MGI Symbol;Acc:MGI:3041256]
[truncated: 4,005 more rows]
