# Supplementary material for: The conjugation-resistant bile acid norUDCA cures liver fibrosis but impairs systemic energy metabolism
Source: Research Square preprint supplement (doi:10.21203/rs.3.rs-8280795/v1), 2025-12-10
Supplement: Supplementary file 2 [file a0ff5ee6babc22c697edca14.xlsx]

## Sheet: Heart_control vs norUDCA
gene_id	HDiet_4	HDiet_8	HDiet_10	HDiet_12	HMock_1	HMock_3	HMock_5	HMock_9	Control	norUDCA	log2FoldChange	padj	gene_name	gene_description
ENSMUSG00000032942	163.859	151.284	140.483	193.867	3208.92	4769.55	2799.14	3705.55	3620.79	162.373	-4.47617	8.56614e-136	Ucp3	uncoupling protein 3 (mitochondrial, proton carrier) [Source:MGI Symbol;Acc:MGI:1099787]
ENSMUSG00000020241	670.936	656.964	658.385	582.555	2467.47	2290.83	2330.82	2299.67	2347.2	642.21	-1.87138	1.74661e-113	Col6a2	collagen, type VI, alpha 2 [Source:MGI Symbol;Acc:MGI:88460]
ENSMUSG00000034958	1381.73	1735.56	1264.35	1442.06	165.495	193.277	146.795	199.147	176.179	1455.93	3.05081	1.33027e-98	Atcay	ataxia, cerebellar, Cayman type [Source:MGI Symbol;Acc:MGI:2448730]
ENSMUSG00000085779	10696.2	8914.54	8197.31	10074.4	1437.1	1533.12	1112.06	1557.61	1409.97	9470.62	2.74871	1.47625e-92	Atcayos	ataxia, cerebellar, Cayman type, opposite strand [Source:MGI Symbol;Acc:MGI:1916928]
ENSMUSG00000044338	44.2862	30.8171	34.5967	32.4703	796.62	770.797	562.119	962.543	773.02	35.5426	-4.43781	1.69236e-90	Aplnr	apelin receptor [Source:MGI Symbol;Acc:MGI:1346086]
ENSMUSG00000023034	7494.34	10690.7	6358.45	6359.4	477.785	368.073	288.578	235.894	342.583	7725.73	4.49381	1.28647e-88	Nr4a1	nuclear receptor subfamily 4, group A, member 1 [Source:MGI Symbol;Acc:MGI:1352454]
ENSMUSG00000026043	558.006	469.26	544.111	377.228	6380.44	4868.11	8835.65	8423.44	7126.91	487.151	-3.87111	4.35413e-86	Col3a1	collagen, type III, alpha 1 [Source:MGI Symbol;Acc:MGI:88453]
ENSMUSG00000019577	7265.16	8207.15	7082.88	7545.52	56289.8	43456.5	46519.1	36528	45698.4	7525.18	-2.60246	4.37891e-86	Pdk4	pyruvate dehydrogenase kinase, isoenzyme 4 [Source:MGI Symbol;Acc:MGI:1351481]
ENSMUSG00000038894	9533.72	17211.3	11834.2	13053.1	863.005	583.68	531.328	400.665	594.669	12908.1	4.43931	3.84338e-84	Irs2	insulin receptor substrate 2 [Source:MGI Symbol;Acc:MGI:109334]
ENSMUSG00000028339	416.291	392.217	369.031	297.008	3282.79	2597.3	2547.08	2278.34	2676.38	368.637	-2.86235	7.49392e-83	Col15a1	collagen, type XV, alpha 1 [Source:MGI Symbol;Acc:MGI:88449]
ENSMUSG00000028150	5824.75	5377.58	4936.84	6194.18	1608.2	1278.24	1447.19	1466.34	1449.99	5583.34	1.94573	2.59748e-72	Rorc	RAR-related orphan receptor gamma [Source:MGI Symbol;Acc:MGI:104856]
ENSMUSG00000027956	7206.48	8656.8	7638.53	6528.44	1866.26	1468.44	1472.97	1351.35	1539.76	7507.56	2.28525	1.43937e-68	Tmem144	transmembrane protein 144 [Source:MGI Symbol;Acc:MGI:1917902]
ENSMUSG00000031530	2080.35	3952.99	2489.91	2772.39	182.325	78.5427	122.449	81.7925	116.277	2823.91	4.60047	2.53767e-67	Dusp4	dual specificity phosphatase 4 [Source:MGI Symbol;Acc:MGI:2442191]
ENSMUSG00000038546	4948.99	5000.77	4185.15	5206.71	1600.72	1367.57	1481.56	1375.06	1456.23	4835.4	1.73116	1.98902e-65	Ranbp9	RAN binding protein 9 [Source:MGI Symbol;Acc:MGI:1928741]
ENSMUSG00000107428	262.396	219.922	265.241	220.607	12.155	6.93024	11.4572	5.92699	9.11736	242.041	4.7034	6.2169e-63	Gm44154	predicted gene, 44154 [Source:MGI Symbol;Acc:MGI:5690546]
ENSMUSG00000053093	382480	281903	233919	269171	15809	20893.9	24349.4	9777.16	17707.4	291868	4.04281	5.93707e-61	Myh7	myosin, heavy polypeptide 7, cardiac muscle, beta [Source:MGI Symbol;Acc:MGI:2155600]
ENSMUSG00000001506	693.079	528.093	616.45	540.535	2825.57	2349.35	3301.11	2776.2	2813.06	594.539	-2.24172	1.26152e-60	Col1a1	collagen, type I, alpha 1 [Source:MGI Symbol;Acc:MGI:88467]
ENSMUSG00000029661	1393.91	1085.6	1202.5	1023.77	3976.56	3814.71	4199.06	4076.58	4016.73	1176.44	-1.77148	1.449e-57	Col1a2	collagen, type I, alpha 2 [Source:MGI Symbol;Acc:MGI:88468]
ENSMUSG00000112831	1204.59	1746.77	1059.92	1528.97	124.355	98.5634	181.167	120.911	131.249	1385.06	3.39521	2.98345e-57	AC167229.1	novel transcript
ENSMUSG00000022526	1640.8	1661.32	1645.96	1814.52	673.2	610.631	617.973	692.273	648.519	1690.65	1.38561	7.04422e-57	Zfp251	zinc finger protein 251 [Source:MGI Symbol;Acc:MGI:1918841]
ENSMUSG00000045193	6313	5804.82	5348.85	5751.06	2050.46	2293.14	2259.22	1938.13	2135.23	5804.43	1.44169	1.20521e-54	Cirbp	cold inducible RNA binding protein [Source:MGI Symbol;Acc:MGI:893588]
ENSMUSG00000086645	477.184	602.334	404.676	360.038	42.075	35.4212	54.4217	42.6743	43.6481	461.058	3.3933	1.93276e-54	Gm15743	predicted gene 15743 [Source:MGI Symbol;Acc:MGI:3783185]
ENSMUSG00000028607	2513.24	2744.12	2705.88	2518.36	7265.89	7475.42	6587.89	6170	6874.8	2620.4	-1.39207	2.2368e-53	Cpt2	carnitine palmitoyltransferase 2 [Source:MGI Symbol;Acc:MGI:109176]
ENSMUSG00000026414	587646	613894	563981	641960	306209	297227	298441	305228	301776	601871	0.995976	3.05141e-51	Tnnt2	troponin T2, cardiac [Source:MGI Symbol;Acc:MGI:104597]
ENSMUSG00000061175	6578.72	7847.15	6764.17	6194.18	1510.03	970.234	1232.37	841.633	1138.56	6846.06	2.58728	1.10916e-49	Fnip2	folliculin interacting protein 2 [Source:MGI Symbol;Acc:MGI:2683054]
ENSMUSG00000001627	5141.63	6670.5	5250.31	5674.66	1491.33	1063.41	1287.5	969.656	1202.97	5684.27	2.23957	2.81498e-49	Ifrd1	interferon-related developmental regulator 1 [Source:MGI Symbol;Acc:MGI:1316717]
ENSMUSG00000032177	889.046	952.528	955.078	869.058	2526.37	2308.54	2102.4	2344.72	2320.51	916.427	-1.34065	3.51466e-49	Pde4a	phosphodiesterase 4A, cAMP specific [Source:MGI Symbol;Acc:MGI:99558]
ENSMUSG00000070436	1882.16	2238.44	2254.03	1890.92	6887.21	5980.03	7384.88	5989.82	6560.48	2066.39	-1.66733	4.41951e-49	Serpinh1	serine (or cysteine) peptidase inhibitor, clade H, member 1 [Source:MGI Symbol;Acc:MGI:88283]
ENSMUSG00000022270	42822.6	57576.1	53051.4	47221.3	13943.7	9655.37	11818.1	12964.7	12095.5	50167.8	2.05237	6.50412e-49	Retreg1	reticulophagy regulator 1 [Source:MGI Symbol;Acc:MGI:1913520]
ENSMUSG00000013089	2217.63	2231.44	1824.19	2033.21	748	767.717	654.493	721.907	723.029	2076.62	1.52204	1.14549e-48	Etv5	ets variant 5 [Source:MGI Symbol;Acc:MGI:1096867]
ENSMUSG00000003849	4407.59	4401.24	4107.57	4493.31	1679.26	1631.69	1976.37	1660.74	1737.01	4352.43	1.32433	1.14549e-48	Nqo1	NAD(P)H dehydrogenase, quinone 1 [Source:MGI Symbol;Acc:MGI:103187]
ENSMUSG00000037519	7639.37	7289.64	6749.5	6471.14	2607.72	2091.39	2476.19	2047.18	2305.62	7037.41	1.60937	6.77464e-48	Ppfia1	protein tyrosine phosphatase, receptor type, f polypeptide (PTPRF), interacting protein (liprin), alpha 1 [Source:MGI Symbol;Acc:MGI:1924750]
ENSMUSG00000111815	1121.55	1019.76	890.078	981.749	243.1	187.116	138.202	165.956	183.594	1003.29	2.452	9.82269e-47	Gm6018	predicted gene 6018 [Source:MGI Symbol;Acc:MGI:3646809]
ENSMUSG00000015852	9.9644	18.2101	24.1128	18.1452	237.49	237.938	244.182	341.395	265.251	17.6081	-3.90517	9.82269e-47	Fcrls	Fc receptor-like S, scavenger receptor [Source:MGI Symbol;Acc:MGI:1933397]
ENSMUSG00000024011	305.575	299.766	477.015	212.012	2816.22	2531.08	2190.47	2477.48	2503.81	323.592	-2.9519	1.22411e-45	Pi16	peptidase inhibitor 16 [Source:MGI Symbol;Acc:MGI:1921366]
ENSMUSG00000049999	139.502	85.4473	101.693	112.691	467.5	552.109	561.403	513.277	523.572	109.833	-2.24702	3.01299e-45	Ppp1r3d	protein phosphatase 1, regulatory subunit 3D [Source:MGI Symbol;Acc:MGI:1917664]
ENSMUSG00000029135	4912.45	6033.14	5821.68	6531.3	1530.6	981.014	1262.44	940.021	1178.52	5824.64	2.30476	1.91085e-43	Fosl2	fos-like antigen 2 [Source:MGI Symbol;Acc:MGI:102858]
ENSMUSG00000046916	193.752	196.109	209.677	181.452	733.975	714.585	604.367	598.626	662.888	195.247	-1.76507	2.19749e-43	Myct1	myc target 1 [Source:MGI Symbol;Acc:MGI:1915882]
ENSMUSG00000087221	544.721	567.314	583.95	689.516	173.91	184.036	163.981	190.849	178.194	596.375	1.74805	1.10707e-42	BC037032	cDNA Sequence BC037032 [Source:MGI Symbol;Acc:MGI:3040924]
ENSMUSG00000002289	49.822	68.638	84.9191	74.4907	667.59	579.83	1200.86	692.273	785.138	69.4674	-3.49726	1.69521e-42	Angptl4	angiopoietin-like 4 [Source:MGI Symbol;Acc:MGI:1888999]
ENSMUSG00000026628	1034.08	2431.75	1433.14	1489.81	143.99	79.3128	161.117	105.5	122.48	1597.2	3.70244	4.71906e-42	Atf3	activating transcription factor 3 [Source:MGI Symbol;Acc:MGI:109384]
ENSMUSG00000037010	150.573	130.272	144.677	113.646	548.845	548.259	454.708	496.682	512.123	134.792	-1.92697	7.36381e-42	Apln	apelin [Source:MGI Symbol;Acc:MGI:1353624]
ENSMUSG00000027238	21123.4	29319.6	24302.6	25376.5	6874.12	4311.38	4607.23	4241.35	5008.52	25030.5	2.32121	1.76379e-41	Frmd5	FERM domain containing 5 [Source:MGI Symbol;Acc:MGI:2442557]
ENSMUSG00000028834	35642.7	52774.2	46004.1	35999	11186.3	7325.26	8597.2	8532.5	8910.33	42605	2.25749	4.43964e-41	Trim63	tripartite motif-containing 63 [Source:MGI Symbol;Acc:MGI:2447992]
ENSMUSG00000040950	68.6436	88.2489	69.1933	59.2105	321.64	401.184	343	430.3	374.031	71.3241	-2.40217	4.80363e-41	Mgl2	macrophage galactose N-acetyl-galactosamine specific lectin 2 [Source:MGI Symbol;Acc:MGI:2385729]
ENSMUSG00000031461	134654	151295	134830	124084	57999	60347	61008.9	52144.5	57874.8	136216	1.23483	2.10831e-40	Myom2	myomesin 2 [Source:MGI Symbol;Acc:MGI:1328358]
ENSMUSG00000042834	110.716	89.6497	89.1126	63.9856	422.62	560.579	473.326	595.07	512.899	88.3659	-2.54116	4.1121e-40	Nrep	neuronal regeneration related protein [Source:MGI Symbol;Acc:MGI:99444]
ENSMUSG00000029167	26400.1	46168.2	23972.3	28267.3	5931.64	4503.12	4307.19	4996.45	4934.6	31202	2.66067	1.05564e-39	Ppargc1a	peroxisome proliferative activated receptor, gamma, coactivator 1 alpha [Source:MGI Symbol;Acc:MGI:1342774]
ENSMUSG00000044991	4963.38	6115.79	4309.91	4278.44	1502.55	1317.52	1172.93	1442.63	1358.91	4916.88	1.85563	3.93388e-39	Shld1	shieldin complex subunit 1 [Source:MGI Symbol;Acc:MGI:1920997]
ENSMUSG00000033849	17.7145	40.6225	35.6451	24.8302	305.745	262.579	230.576	346.136	286.259	29.7031	-3.28358	1.08482e-38	B3galt2	UDP-Gal:betaGlcNAc beta 1,3-galactosyltransferase, polypeptide 2 [Source:MGI Symbol;Acc:MGI:1349461]
ENSMUSG00000025612	4000.15	4831.28	4588.78	5218.17	1897.12	1680.97	1670.6	1530.35	1694.76	4659.59	1.45881	1.64055e-38	Bach1	BTB and CNC homology 1, basic leucine zipper transcription factor 1 [Source:MGI Symbol;Acc:MGI:894680]
ENSMUSG00000048126	240.253	277.354	268.386	192.912	1462.34	1132.71	1514.5	945.948	1263.87	244.726	-2.37249	4.23981e-38	Col6a3	collagen, type VI, alpha 3 [Source:MGI Symbol;Acc:MGI:88461]
ENSMUSG00000031490	4853.77	5743.18	5073.13	5144.63	2394.54	2510.29	2597.2	2342.35	2461.09	5203.68	1.07924	9.22951e-38	Eif4ebp1	eukaryotic translation initiation factor 4E binding protein 1 [Source:MGI Symbol;Acc:MGI:103267]
ENSMUSG00000024892	2767.89	2696.49	2738.38	2651.1	1561.45	1600.12	1551.73	1573.02	1571.58	2713.47	0.787872	3.11295e-37	Pcx	pyruvate carboxylase [Source:MGI Symbol;Acc:MGI:97520]
ENSMUSG00000026360	676.472	697.586	683.546	688.561	1439.9	1567	1488	1743.72	1559.66	686.541	-1.18287	9.7222e-37	Rgs2	regulator of G-protein signaling 2 [Source:MGI Symbol;Acc:MGI:1098271]
ENSMUSG00000090015	387.504	431.439	417.257	416.384	142.12	143.995	122.449	148.175	139.185	413.146	1.57485	1.33369e-36	Gm15446	predicted gene 15446 [Source:MGI Symbol;Acc:MGI:3709333]
ENSMUSG00000020674	962.118	778.831	789.433	689.516	2519.83	2433.28	2348.73	2080.37	2345.55	804.975	-1.54376	9.29221e-36	Pxdn	peroxidasin [Source:MGI Symbol;Acc:MGI:1916925]
ENSMUSG00000056481	65.3222	54.6303	70.2417	66.8506	243.1	288.76	282.85	318.872	283.395	64.2612	-2.13044	1.73047e-35	Cd248	CD248 antigen, endosialin [Source:MGI Symbol;Acc:MGI:1917695]
ENSMUSG00000024042	6971.76	8729.64	6530.38	6569.5	1494.13	921.722	1029	593.884	1009.68	7200.32	2.83338	1.09647e-34	Sik1	salt inducible kinase 1 [Source:MGI Symbol;Acc:MGI:104754]
ENSMUSG00000015090	64814	70459	73263.2	65344.5	19448	12954.9	21638.4	14278.1	17079.9	68470.2	2.00312	1.24663e-34	Ptgds	prostaglandin D2 synthase (brain) [Source:MGI Symbol;Acc:MGI:99261]
ENSMUSG00000095438	587.9	477.665	499.031	424.979	120.615	135.525	101.683	144.619	125.61	497.393	1.99219	2.36062e-34	Mir133a-1hg	Mir133a-1, Mir1b and Mir1a-2 host gene [Source:MGI Symbol;Acc:MGI:5433911]
ENSMUSG00000102856	253.539	383.813	187.661	269.312	22.44	20.7907	11.4572	29.635	21.0807	273.581	3.72892	2.52891e-34	Gm37084	predicted gene, 37084 [Source:MGI Symbol;Acc:MGI:5610312]
ENSMUSG00000016494	1502.41	1532.45	1638.62	1281.62	3625.93	3555.98	3228.07	3737.56	3536.89	1488.78	-1.24859	4.07136e-34	Cd34	CD34 antigen [Source:MGI Symbol;Acc:MGI:88329]
ENSMUSG00000024661	65572.4	68307.4	66020.9	69865.5	39081.2	39843.5	41071.2	42311.6	40576.9	67441.6	0.733011	1.6975e-33	Fth1	ferritin heavy polypeptide 1 [Source:MGI Symbol;Acc:MGI:95588]
ENSMUSG00000050296	751.759	913.306	806.207	807.937	286.11	259.499	322.234	329.541	299.346	819.802	1.45465	4.11053e-33	Abca12	ATP-binding cassette, sub-family A (ABC1), member 12 [Source:MGI Symbol;Acc:MGI:2676312]
ENSMUSG00000079105	139.502	81.245	124.758	112.691	454.41	477.417	413.175	513.277	464.57	114.549	-2.00948	6.2579e-33	C7	complement component 7 [Source:MGI Symbol;Acc:MGI:88235]
ENSMUSG00000069662	576.828	439.844	427.741	441.214	1716.66	1368.34	1736.48	1376.25	1549.43	471.407	-1.71701	6.28484e-33	Marcks	myristoylated alanine rich protein kinase C substrate [Source:MGI Symbol;Acc:MGI:96907]
ENSMUSG00000045094	1279.87	869.882	864.917	944.503	279.565	234.088	266.38	201.518	245.388	989.793	2.00939	9.35521e-33	Arhgef37	Rho guanine nucleotide exchange factor (GEF) 37 [Source:MGI Symbol;Acc:MGI:3045339]
ENSMUSG00000001119	1122.66	794.24	844.997	823.217	3000.42	2634.26	2599.35	2470.37	2676.1	896.278	-1.57779	2.20457e-32	Col6a1	collagen, type VI, alpha 1 [Source:MGI Symbol;Acc:MGI:88459]
ENSMUSG00000038403	3723.36	3689.64	4117	3572.69	7075.15	6868.64	6691	7015.19	6912.49	3775.67	-0.872271	2.64356e-32	Hfe2	hemochromatosis type 2 (juvenile) [Source:MGI Symbol;Acc:MGI:1916835]
ENSMUSG00000017754	220.324	233.93	196.048	166.171	681.615	719.975	611.528	587.958	650.269	204.118	-1.67903	2.97449e-32	Pltp	phospholipid transfer protein [Source:MGI Symbol;Acc:MGI:103151]
ENSMUSG00000030643	734.044	841.866	655.24	878.608	274.89	198.667	223.415	231.153	232.031	777.44	1.74646	4.49663e-32	Rab30	RAB30, member RAS oncogene family [Source:MGI Symbol;Acc:MGI:1923235]
ENSMUSG00000047617	1512.37	1432.99	1305.24	1581.49	597.465	450.466	526.315	427.929	500.544	1458.03	1.54129	7.30917e-32	Paxx	non-homologous end joining factor [Source:MGI Symbol;Acc:MGI:2442831]
ENSMUSG00000036256	2108.02	1829.41	2206.85	1660.76	4987.29	4948.96	4906.55	4440.5	4820.83	1951.26	-1.30502	1.09942e-31	Igfbp7	insulin-like growth factor binding protein 7 [Source:MGI Symbol;Acc:MGI:1352480]
ENSMUSG00000028530	10955.3	11641.8	11246	10903.3	6249.54	6389.68	5495.88	6013.53	6037.16	11186.6	0.889841	1.10481e-31	Jak1	Janus kinase 1 [Source:MGI Symbol;Acc:MGI:96628]
ENSMUSG00000032411	9961.08	10323.7	10432.5	10665.5	5217.3	5194.6	5419.26	4387.16	5054.58	10345.7	1.03285	1.20254e-31	Tfdp2	transcription factor Dp 2 [Source:MGI Symbol;Acc:MGI:107167]
ENSMUSG00000036206	1763.7	2176.81	2086.28	1603.46	743.325	622.952	683.852	611.665	665.449	1907.56	1.51803	1.87003e-31	Sh3bp4	SH3-domain binding protein 4 [Source:MGI Symbol;Acc:MGI:2138297]
ENSMUSG00000069495	1625.3	1865.83	1611.37	1740.98	857.395	836.249	827.783	893.79	853.804	1710.87	1.0032	4.00265e-31	Epc2	enhancer of polycomb homolog 2 [Source:MGI Symbol;Acc:MGI:1278321]
ENSMUSG00000085162	618.9	578.52	550.402	528.12	189.805	220.998	230.576	231.153	218.133	568.985	1.38197	4.21554e-31	Gm12295	predicted gene 12295 [Source:MGI Symbol;Acc:MGI:3650535]
ENSMUSG00000018593	4337.84	3314.24	3762.65	3010.19	11861.4	11106.9	11389.9	9132.31	10872.6	3606.23	-1.59224	7.61416e-31	Sparc	secreted acidic cysteine rich glycoprotein [Source:MGI Symbol;Acc:MGI:98373]
ENSMUSG00000020937	2243.1	2137.58	2038.06	1500.32	651.695	553.649	609.38	692.273	626.749	1979.76	1.66031	5.05537e-30	Plcd3	phospholipase C, delta 3 [Source:MGI Symbol;Acc:MGI:107451]
ENSMUSG00000036944	757.294	876.886	855.481	737.266	354.365	362.683	355.889	329.541	350.619	806.732	1.1983	1.52778e-29	Tmem71	transmembrane protein 71 [Source:MGI Symbol;Acc:MGI:2146049]
ENSMUSG00000015837	36212.8	37284.5	33485.4	37903.3	16046.5	14257.8	15810.2	11627.6	14435.5	36221.5	1.32708	1.88191e-29	Sqstm1	sequestosome 1 [Source:MGI Symbol;Acc:MGI:107931]
ENSMUSG00000027397	1999.52	2406.53	1709.91	2073.32	733.04	655.293	803.436	610.48	700.562	2047.32	1.54491	2.1964e-29	Slc20a1	solute carrier family 20, member 1 [Source:MGI Symbol;Acc:MGI:108392]
ENSMUSG00000005958	1013.05	868.481	775.804	878.608	327.25	370.383	302.184	292.793	323.153	883.985	1.44941	2.76398e-29	Ephb3	Eph receptor B3 [Source:MGI Symbol;Acc:MGI:104770]
ENSMUSG00000030967	3949.22	4895.71	4382.24	4333.83	2192.58	2147.6	1896.17	2029.4	2066.44	4390.25	1.08695	3.58435e-29	Zranb1	zinc finger, RAN-binding domain containing 1 [Source:MGI Symbol;Acc:MGI:106441]
ENSMUSG00000097729	1825.7	1619.3	1506.53	1835.53	819.06	721.515	726.816	775.25	760.661	1696.76	1.15901	8.26121e-29	2310015A10Rik	RIKEN cDNA 2310015A10 gene [Source:MGI Symbol;Acc:MGI:1916798]
ENSMUSG00000105541	161.645	239.533	186.612	191.002	38.335	38.5013	42.2484	29.635	37.1799	194.698	2.36874	9.90829e-29	Gm43136	predicted gene 43136 [Source:MGI Symbol;Acc:MGI:5663273]
ENSMUSG00000109005	202.609	112.062	142.58	172.857	1.87	6.16021	12.1733	13.0394	8.31072	157.527	4.25888	1.07251e-28	Gm45221	predicted gene 45221 [Source:MGI Symbol;Acc:MGI:5753797]
ENSMUSG00000020902	8726.6	9710.18	9421.83	7910.33	4393.57	3659.17	4191.9	3719.78	3991.1	8942.23	1.16355	1.11936e-28	Ntn1	netrin 1 [Source:MGI Symbol;Acc:MGI:105088]
ENSMUSG00000043953	2941.71	3164.35	1486.61	2585.21	541.365	502.827	534.192	442.154	505.135	2544.47	2.33151	1.23261e-28	Ccrl2	chemokine (C-C motif) receptor-like 2 [Source:MGI Symbol;Acc:MGI:1920904]
ENSMUSG00000035283	143.93	126.07	161.451	204.372	632.995	639.892	680.987	967.285	730.29	158.956	-2.19177	1.38472e-28	Adrb1	adrenergic receptor, beta 1 [Source:MGI Symbol;Acc:MGI:87937]
ENSMUSG00000036181	13231.6	11476.6	15716.3	13435.1	3468.85	2875.28	4844.25	3880.99	3767.34	13464.9	1.83758	1.51859e-28	Hist1h1c	histone cluster 1, H1c [Source:MGI Symbol;Acc:MGI:1931526]
ENSMUSG00000028211	1985.13	3312.84	2393.46	2448.64	839.63	725.365	731.113	745.615	760.431	2535.02	1.7367	1.64304e-28	Trp53inp1	transformation related protein 53 inducible nuclear protein 1 [Source:MGI Symbol;Acc:MGI:1926609]
ENSMUSG00000053716	615.579	760.621	748.546	577.78	1640.93	2173.02	1877.55	1877.67	1892.29	675.632	-1.48781	1.97993e-28	Dusp7	dual specificity phosphatase 7 [Source:MGI Symbol;Acc:MGI:2387100]
ENSMUSG00000020300	6913.08	8642.79	6700.22	9790.75	3022.86	2360.13	2496.24	2495.26	2593.62	8011.71	1.62724	2.19093e-28	Cpeb4	cytoplasmic polyadenylation element binding protein 4 [Source:MGI Symbol;Acc:MGI:1914829]
ENSMUSG00000021477	18219.4	22523.1	21834.7	17848.2	6461.79	5438.7	8246.32	6414.19	6640.25	20106.3	1.5982	3.45738e-28	Ctsl	cathepsin L [Source:MGI Symbol;Acc:MGI:88564]
ENSMUSG00000041361	33201.4	38728.7	35245.6	36793.6	21218	20223.2	20496.2	20038	20493.8	35992.3	0.812444	3.62178e-28	Myzap	myocardial zonula adherens protein [Source:MGI Symbol;Acc:MGI:2142908]
ENSMUSG00000100954	407.433	501.478	450.805	521.435	185.13	167.096	163.265	173.068	172.14	470.288	1.45199	3.95512e-28	Gm10138	predicted gene 10138 [Source:MGI Symbol;Acc:MGI:3708522]
ENSMUSG00000055632	543.613	437.042	491.692	307.513	2260.83	2313.93	1783.74	1533.91	1973.1	444.965	-2.14989	6.03956e-28	Hmcn2	hemicentin 2 [Source:MGI Symbol;Acc:MGI:2677838]
ENSMUSG00000090291	114.037	126.07	109.032	169.036	14.025	11.5504	16.4697	16.5956	14.6602	129.544	3.15444	1.23008e-27	Lrrc10b	leucine rich repeat containing 10B [Source:MGI Symbol;Acc:MGI:2685551]
ENSMUSG00000086247	318.861	495.875	374.273	345.713	96.3051	106.264	86.6451	74.6801	90.9735	383.68	2.06662	2.25347e-27	Gm15787	predicted gene 15787 [Source:MGI Symbol;Acc:MGI:3783229]
ENSMUSG00000032350	1534.52	1213.07	1221.37	1482.17	514.25	550.569	602.935	513.277	545.258	1362.78	1.32044	2.53634e-27	Gclc	glutamate-cysteine ligase, catalytic subunit [Source:MGI Symbol;Acc:MGI:104990]
ENSMUSG00000016528	25280.8	29690.8	23614.8	26501.5	13184.4	11011.4	12729.7	12126.6	12263	26272	1.09916	5.92343e-27	Mapkapk2	MAP kinase-activated protein kinase 2 [Source:MGI Symbol;Acc:MGI:109298]
ENSMUSG00000046480	572.399	558.91	647.901	554.86	1633.45	1736.41	1270.32	1426.03	1516.55	583.518	-1.37755	6.49328e-27	Scn4b	sodium channel, type IV, beta [Source:MGI Symbol;Acc:MGI:2687406]
ENSMUSG00000021226	1347.41	1208.87	1254.92	1443.97	3580.12	3120.92	3011.81	2669.52	3095.59	1313.79	-1.23597	2.1001e-26	Acot2	acyl-CoA thioesterase 2 [Source:MGI Symbol;Acc:MGI:2159605]
ENSMUSG00000045045	109.608	149.883	139.435	148.026	367.455	418.895	373.791	410.148	392.572	136.738	-1.52234	2.84055e-26	Lrfn4	leucine rich repeat and fibronectin type III domain containing 4 [Source:MGI Symbol;Acc:MGI:2385612]
ENSMUSG00000051335	5258.99	6538.82	5100.39	7011.67	2157.05	1600.89	2239.88	1786.4	1946.05	5977.47	1.61874	3.0535e-26	Gfod1	glucose-fructose oxidoreductase domain containing 1 [Source:MGI Symbol;Acc:MGI:2145304]
ENSMUSG00000020542	3695.69	4184.12	2911.36	3869.69	1320.22	1493.08	1531.68	1452.11	1449.27	3665.21	1.33795	4.10129e-26	Myocd	myocardin [Source:MGI Symbol;Acc:MGI:2137495]
ENSMUSG00000026728	3460.97	2896.8	3249.99	3099	6343.04	7122.75	8208.37	6654.83	7082.25	3176.69	-1.15668	5.73522e-26	Vim	vimentin [Source:MGI Symbol;Acc:MGI:98932]
ENSMUSG00000040841	186.002	201.712	183.467	209.147	433.84	521.308	474.758	478.901	477.202	195.082	-1.29156	5.73522e-26	Six5	sine oculis-related homeobox 5 [Source:MGI Symbol;Acc:MGI:106220]
ENSMUSG00000028271	1988.45	2776.34	1625	1875.64	575.96	457.396	463.301	640.115	534.193	2066.36	1.95314	6.39226e-26	Gtf2b	general transcription factor IIB [Source:MGI Symbol;Acc:MGI:2385191]
ENSMUSG00000031636	2212.1	2598.44	1790.64	3427.53	485.265	639.892	568.564	681.604	593.831	2507.18	2.07863	9.48513e-26	Pdlim3	PDZ and LIM domain 3 [Source:MGI Symbol;Acc:MGI:1859274]
ENSMUSG00000086430	131.752	254.941	150.967	141.341	3.74	15.4005	15.0376	11.854	11.508	169.75	3.85363	1.28069e-25	4930551O13Rik	RIKEN cDNA 4930551O13 gene [Source:MGI Symbol;Acc:MGI:1922513]
ENSMUSG00000078349	669.829	769.026	590.24	801.252	260.865	214.837	231.292	280.939	246.984	707.587	1.52313	2.79697e-25	AW011738	expressed sequence AW011738 [Source:MGI Symbol;Acc:MGI:2140540]
ENSMUSG00000038463	1316.41	1217.27	832.417	1350.38	315.095	331.882	348.729	399.479	348.796	1179.12	1.75892	2.96587e-25	Olfml2b	olfactomedin-like 2B [Source:MGI Symbol;Acc:MGI:2443310]
ENSMUSG00000042406	4294.66	4990.96	4321.44	4982.28	2192.58	2132.97	2448.26	1953.54	2181.84	4647.33	1.08991	3.70831e-25	Atf4	activating transcription factor 4 [Source:MGI Symbol;Acc:MGI:88096]
ENSMUSG00000041930	452.827	812.45	362.741	319.928	71.995	46.2016	47.977	34.3765	50.1376	486.986	3.2737	5.4535e-25	Fam222a	family with sequence similarity 222, member A [Source:MGI Symbol;Acc:MGI:3605543]
ENSMUSG00000029314	142.823	191.906	183.467	150.891	423.555	475.106	435.374	435.041	442.269	167.272	-1.4092	9.2569e-25	Gpat3	glycerol-3-phosphate acyltransferase 3 [Source:MGI Symbol;Acc:MGI:3603816]
ENSMUSG00000031659	259.074	217.12	213.87	203.417	644.215	646.822	621.553	500.238	603.207	223.37	-1.43631	1.14029e-24	Adcy7	adenylate cyclase 7 [Source:MGI Symbol;Acc:MGI:102891]
ENSMUSG00000020178	86.3581	85.4473	76.532	61.1205	486.2	342.662	360.186	270.271	364.83	77.3645	-2.24499	1.29067e-24	Adora2a	adenosine A2a receptor [Source:MGI Symbol;Acc:MGI:99402]
ENSMUSG00000025790	8082.24	9204.5	8402.8	9454.58	3900.82	3938.69	4836.37	3961.6	4159.37	8786.03	1.07848	2.05215e-24	Slco3a1	solute carrier organic anion transporter family, member 3a1 [Source:MGI Symbol;Acc:MGI:1351867]
ENSMUSG00000086290	397.469	561.711	452.902	455.539	166.43	165.556	180.451	162.4	168.709	466.905	1.46333	2.57896e-24	Snhg12	small nucleolar RNA host gene 12 [Source:MGI Symbol;Acc:MGI:1916721]
ENSMUSG00000038594	1782.52	2119.37	1826.28	1683.68	878.901	839.329	963.121	855.857	884.302	1852.96	1.06527	3.93508e-24	Cep85l	centrosomal protein 85-like [Source:MGI Symbol;Acc:MGI:3642684]
ENSMUSG00000005514	2917.36	3252.6	2996.28	3166.81	1743.78	1850.37	1843.18	1676.15	1778.37	3083.26	0.792533	4.48896e-24	Por	P450 (cytochrome) oxidoreductase [Source:MGI Symbol;Acc:MGI:97744]
ENSMUSG00000074264	846.974	939.921	876.449	840.407	424.49	347.282	430.361	422.002	406.034	875.938	1.10973	4.7337e-24	Amy1	amylase 1, salivary [Source:MGI Symbol;Acc:MGI:88019]
ENSMUSG00000006418	6253.21	7900.38	6006.19	6689.83	3325.8	2759.01	3018.97	2943.34	3011.78	6712.4	1.15602	5.66728e-24	Rnf114	ring finger protein 114 [Source:MGI Symbol;Acc:MGI:1933159]
ENSMUSG00000028341	2399.21	5143.65	2357.82	2514.54	281.435	121.664	147.511	145.804	174.104	3103.8	4.15642	7.51002e-24	Nr4a3	nuclear receptor subfamily 4, group A, member 3 [Source:MGI Symbol;Acc:MGI:1352457]
ENSMUSG00000039157	168.288	124.669	175.08	118.421	644.215	470.486	619.405	463.491	549.399	146.614	-1.90517	8.519e-24	Fam102a	family with sequence similarity 102, member A [Source:MGI Symbol;Acc:MGI:2138935]
ENSMUSG00000022237	3477.58	4804.66	4403.21	3456.18	1642.8	1242.05	1419.26	1545.76	1462.47	4035.41	1.46456	9.95488e-24	Ankrd33b	ankyrin repeat domain 33B [Source:MGI Symbol;Acc:MGI:1917904]
ENSMUSG00000056260	973.19	1023.97	1090.32	1049.55	516.12	475.877	550.662	563.064	526.431	1034.26	0.976403	1.08215e-23	Lrif1	ligand dependent nuclear receptor interacting factor 1 [Source:MGI Symbol;Acc:MGI:2445214]
ENSMUSG00000064145	3266.11	3521.55	3361.12	3767.51	1874.68	2009.77	2049.41	1851.59	1946.36	3479.07	0.837178	1.53365e-23	Arih2	ariadne RBR E3 ubiquitin protein ligase 2 [Source:MGI Symbol;Acc:MGI:1344361]
ENSMUSG00000069763	1732.7	1984.9	1385.96	1723.79	736.78	723.825	723.236	752.728	734.142	1706.84	1.21668	1.75e-23	Tmem100	transmembrane protein 100 [Source:MGI Symbol;Acc:MGI:1915138]
ENSMUSG00000014470	3083.43	2945.83	2846.36	2583.3	1538.08	1661.72	1556.03	1556.43	1578.06	2864.73	0.859462	1.86338e-23	Rnf166	ring finger protein 166 [Source:MGI Symbol;Acc:MGI:1915968]
ENSMUSG00000008348	5508.1	4750.03	4525.87	4784.59	2420.72	1903.51	1851.77	1672.6	1962.15	4892.15	1.31781	1.88956e-23	Ubc	ubiquitin C [Source:MGI Symbol;Acc:MGI:98889]
ENSMUSG00000021223	112.93	110.661	92.2578	75.4457	762.025	709.965	471.177	359.176	575.586	97.8237	-2.56237	2.03178e-23	Papln	papilin, proteoglycan-like sulfated glycoprotein [Source:MGI Symbol;Acc:MGI:2386139]
ENSMUSG00000015202	3986.87	4881.7	3832.89	4112.27	1772.76	1059.56	1358.39	1210.29	1350.25	4203.43	1.63823	2.14401e-23	Cnksr3	Cnksr family member 3 [Source:MGI Symbol;Acc:MGI:2674130]
ENSMUSG00000071226	344.325	310.972	361.692	300.828	738.65	747.696	802.004	657.896	736.562	329.454	-1.16226	2.48263e-23	Cecr2	CECR2, histone acetyl-lysine reader [Source:MGI Symbol;Acc:MGI:1923799]
ENSMUSG00000050989	441.755	427.237	376.37	355.263	839.63	845.489	819.906	804.885	827.478	400.156	-1.05195	3.20357e-23	Selenon	selenoprotein N [Source:MGI Symbol;Acc:MGI:2151208]
ENSMUSG00000026672	9851.47	11367.3	10112.7	8893.99	5123.8	3874	4451.12	4075.4	4381.08	10056.4	1.19858	4.65194e-23	Optn	optineurin [Source:MGI Symbol;Acc:MGI:1918898]
ENSMUSG00000025453	353.183	323.579	255.806	335.208	83.215	48.5117	78.0522	91.2757	75.2636	316.944	2.08513	6.1073e-23	Nnt	nicotinamide nucleotide transhydrogenase [Source:MGI Symbol;Acc:MGI:109279]
ENSMUSG00000097675	143.93	151.284	154.112	141.341	30.855	16.9406	34.3716	34.3765	29.1359	147.667	2.35437	1.186e-22	1700101I11Rik	RIKEN cDNA 1700101I11 gene [Source:MGI Symbol;Acc:MGI:1915180]
ENSMUSG00000027750	325.504	169.494	381.612	252.122	1301.52	1559.3	1043.32	1380.99	1321.28	282.183	-2.2238	1.30585e-22	Postn	periostin, osteoblast specific factor [Source:MGI Symbol;Acc:MGI:1926321]
ENSMUSG00000050556	1142.58	1032.37	1115.48	972.199	2253.35	2746.69	2282.85	2079.19	2340.52	1065.66	-1.13582	1.41703e-22	Kcnb1	potassium voltage gated channel, Shab-related subfamily, member 1 [Source:MGI Symbol;Acc:MGI:96666]
ENSMUSG00000031972	1050.69	1434.39	1794.83	1380.94	10565.5	5495.68	5344.07	6238.75	6911	1415.22	-2.28777	1.41703e-22	Acta1	actin, alpha 1, skeletal muscle [Source:MGI Symbol;Acc:MGI:87902]
ENSMUSG00000036533	418.505	355.797	392.096	363.858	841.5	786.197	734.693	876.009	809.6	382.564	-1.07836	1.48596e-22	Cdc42ep3	CDC42 effector protein (Rho GTPase binding) 3 [Source:MGI Symbol;Acc:MGI:2384718]
ENSMUSG00000031666	2894.1	2763.73	2992.09	3055.07	1756.87	1872.7	1773	1814.84	1804.35	2926.25	0.698199	1.49882e-22	Rbl2	RB transcriptional corepressor like 2 [Source:MGI Symbol;Acc:MGI:105085]
ENSMUSG00000035279	79.7152	60.2334	55.5643	54.4355	281.435	321.101	277.837	197.961	269.584	62.4871	-2.11531	1.64018e-22	Ssc5d	scavenger receptor cysteine rich family, 5 domains [Source:MGI Symbol;Acc:MGI:3606211]
ENSMUSG00000102095	129.537	119.066	106.935	97.4109	20.57	23.8708	16.4697	14.2248	18.7838	113.237	2.57299	1.94131e-22	C730036E19Rik	RIKEN cDNA C730036E19 gene [Source:MGI Symbol;Acc:MGI:3028040]
ENSMUSG00000022661	542.506	694.785	506.369	488.009	1611.01	1804.94	1513.78	1290.9	1555.16	557.917	-1.48264	2.03193e-22	Cd200	CD200 antigen [Source:MGI Symbol;Acc:MGI:1196990]
ENSMUSG00000024905	34.3218	29.4163	39.8386	32.4703	176.715	188.657	167.562	124.467	164.35	34.0117	-2.27169	2.31391e-22	Tesmin	testis expressed metallothionein like [Source:MGI Symbol;Acc:MGI:1340029]
ENSMUSG00000030161	10378.5	12497.7	13266.2	11735.1	5516.5	3478.98	3992.12	4246.1	4308.42	11969.4	1.47429	2.59212e-22	Gabarapl1	gamma-aminobutyric acid (GABA) A receptor-associated protein-like 1 [Source:MGI Symbol;Acc:MGI:1914980]
ENSMUSG00000037185	332.147	375.408	359.596	321.838	132.77	107.034	140.351	97.2027	119.339	347.247	1.53108	3.24671e-22	Krt80	keratin 80 [Source:MGI Symbol;Acc:MGI:1921377]
ENSMUSG00000036492	222.538	162.49	184.516	289.368	45.815	43.8915	47.977	43.8597	45.3858	214.728	2.24485	3.56486e-22	Rnf39	ring finger protein 39 [Source:MGI Symbol;Acc:MGI:2156378]
ENSMUSG00000056749	1448.16	2980.85	1196.21	1831.71	376.805	254.109	366.63	270.271	316.954	1864.23	2.5549	5.1178e-22	Nfil3	nuclear factor, interleukin 3, regulated [Source:MGI Symbol;Acc:MGI:109495]
ENSMUSG00000060187	14541.4	14999.5	12462.1	13742.6	6961.08	6123.25	5170.06	4896.88	5787.82	13936.4	1.26761	5.13221e-22	Lrrc10	leucine rich repeat containing 10 [Source:MGI Symbol;Acc:MGI:2448063]
ENSMUSG00000001751	824.831	825.057	831.368	786.927	380.545	409.654	459.004	435.041	421.061	817.046	0.955187	5.23769e-22	Naglu	alpha-N-acetylglucosaminidase (Sanfilippo disease IIIB) [Source:MGI Symbol;Acc:MGI:1351641]
ENSMUSG00000032363	468.327	298.365	423.547	443.124	1162.21	1654.79	1309.7	1149.84	1319.13	408.341	-1.68958	6.40003e-22	Adamts7	a disintegrin-like and metallopeptidase (reprolysin type) with thrombospondin type 1 motif, 7 [Source:MGI Symbol;Acc:MGI:1347346]
ENSMUSG00000049985	126.216	120.467	147.822	93.5908	20.57	23.8708	16.4697	21.3372	20.5619	122.024	2.57381	7.58333e-22	Ankrd55	ankyrin repeat domain 55 [Source:MGI Symbol;Acc:MGI:1924568]
ENSMUSG00000026885	367.576	357.198	392.096	573.96	115.94	107.034	131.758	117.354	118.022	422.707	1.84229	8.69962e-22	Ttll11	tubulin tyrosine ligase-like family, member 11 [Source:MGI Symbol;Acc:MGI:1921660]
ENSMUSG00000031167	4079.87	4587.54	4377	5262.1	1486.65	1710.23	2196.92	1818.4	1803.05	4576.63	1.3435	1.05831e-21	Rbm3	RNA binding motif (RNP1, RRM) protein 3 [Source:MGI Symbol;Acc:MGI:1099460]
ENSMUSG00000030560	818.188	745.213	719.191	727.716	1369.78	1501.55	1687.07	1740.16	1574.64	752.577	-1.06493	1.05831e-21	Ctsc	cathepsin C [Source:MGI Symbol;Acc:MGI:109553]
ENSMUSG00000096146	7993.66	7778.51	7924.73	8232.17	5451.05	5135.31	5073.39	5412.53	5268.07	7982.27	0.60006	1.21083e-21	Kcnj11	potassium inwardly rectifying channel, subfamily J, member 11 [Source:MGI Symbol;Acc:MGI:107501]
ENSMUSG00000050627	4400.94	4895.71	4656.92	4551.57	2809.68	2800.59	2905.83	3028.69	2886.2	4626.29	0.680782	1.45664e-21	Gpd1l	glycerol-3-phosphate dehydrogenase 1-like [Source:MGI Symbol;Acc:MGI:1289257]
ENSMUSG00000097462	363.147	352.996	323.951	325.658	142.12	128.594	130.326	161.214	140.564	341.438	1.28837	1.73019e-21	9530026P05Rik	RIKEN cDNA 9530026P05 gene [Source:MGI Symbol;Acc:MGI:1924659]
ENSMUSG00000009633	266.825	259.144	287.257	297.963	650.76	823.929	873.611	1124.94	868.311	277.797	-1.64129	2.30388e-21	G0s2	G0/G1 switch gene 2 [Source:MGI Symbol;Acc:MGI:1316737]
ENSMUSG00000031485	4689.91	5231.9	4673.7	5018.57	3068.67	2712.8	2689.58	2633.95	2776.25	4903.52	0.820428	2.62848e-21	Plpbp	pyridoxal phosphate binding protein [Source:MGI Symbol;Acc:MGI:1891207]
ENSMUSG00000026971	39.8576	60.2334	36.6934	21.0102	198.22	231.008	223.415	297.535	237.545	39.4486	-2.6144	2.62848e-21	Itgb6	integrin beta 6 [Source:MGI Symbol;Acc:MGI:96615]
ENSMUSG00000117310	214.788	317.976	185.564	194.822	51.425	46.2016	40.1002	56.8991	48.6565	228.287	2.23635	3.02842e-21	Ptp4a1	protein tyrosine phosphatase 4a1 [Source:NCBI gene;Acc:19243]
ENSMUSG00000034442	2770.1	2898.21	2916.6	3684.42	1376.32	1006.42	1165.05	1340.69	1222.12	3067.33	1.32898	3.58765e-21	Trmt5	TRM5 tRNA methyltransferase 5 [Source:MGI Symbol;Acc:MGI:1923607]
ENSMUSG00000112121	186.002	194.708	159.354	173.812	59.84	45.4316	52.9895	37.9327	49.0485	178.469	1.8507	3.58806e-21	C230072F16Rik	RIKEN cDNA C230072F16 gene [Source:MGI Symbol;Acc:MGI:2444727]
ENSMUSG00000020190	22435.4	27388	25921.3	25396.5	13016.1	13064.3	12162.5	10145.8	12097.2	25285.3	1.06345	3.94986e-21	Mknk2	MAP kinase-interacting serine/threonine kinase 2 [Source:MGI Symbol;Acc:MGI:894279]
ENSMUSG00000038332	16375.9	16872.3	17894.9	17779.4	9395.82	7570.13	8061.57	6529.17	7889.17	17230.6	1.1269	4.01023e-21	Sesn1	sestrin 1 [Source:MGI Symbol;Acc:MGI:2155278]
ENSMUSG00000026473	62310.7	69545.7	65706.4	63843.3	31033.6	26648.3	26864.3	19324.4	25967.6	65351.5	1.33144	4.74013e-21	Glul	glutamate-ammonia ligase (glutamine synthetase) [Source:MGI Symbol;Acc:MGI:95739]
ENSMUSG00000002346	1740.45	1532.45	1729.83	1729.52	3419.3	4007.22	3108.48	3207.69	3435.67	1683.06	-1.0291	4.7711e-21	Slc25a42	solute carrier family 25, member 42 [Source:MGI Symbol;Acc:MGI:1920345]
ENSMUSG00000028307	2165.6	2403.73	2133.46	3479.1	408.595	673.003	545.649	785.919	603.292	2545.47	2.07828	6.10331e-21	Aldob	aldolase B, fructose-bisphosphate [Source:MGI Symbol;Acc:MGI:87995]
ENSMUSG00000040128	8215.09	9862.86	7031.51	7395.58	3774.6	2694.32	3134.26	2918.45	3130.41	8126.26	1.37608	6.81582e-21	Pnrc1	proline-rich nuclear receptor coactivator 1 [Source:MGI Symbol;Acc:MGI:1917838]
ENSMUSG00000025150	224.753	224.124	266.29	211.057	563.805	757.706	540.637	672.121	633.567	231.556	-1.45142	7.53304e-21	Cbr2	carbonyl reductase 2 [Source:MGI Symbol;Acc:MGI:107200]
ENSMUSG00000073481	1785.84	1947.08	1826.28	1946.31	1081.8	1052.63	1148.58	1165.25	1112.06	1876.38	0.755214	8.37637e-21	2021-03-02	mitochondrial amidoxime reducing component 2 [Source:MGI Symbol;Acc:MGI:1914497]
ENSMUSG00000018669	1656.3	1566.07	1457.25	1616.83	838.695	929.422	935.194	878.38	895.423	1574.11	0.812697	1.06365e-20	Cdk5rap3	CDK5 regulatory subunit associated protein 3 [Source:MGI Symbol;Acc:MGI:1933126]
ENSMUSG00000029581	334.361	238.132	223.306	187.182	920.976	804.678	755.459	717.166	799.57	245.745	-1.70392	1.10272e-20	Fscn1	fascin actin-bundling protein 1 [Source:MGI Symbol;Acc:MGI:1352745]
ENSMUSG00000027435	1466.98	1231.28	1266.45	1237.69	2956.47	2431.74	2842.82	2435.99	2666.76	1300.6	-1.03602	1.28019e-20	Cd93	CD93 antigen [Source:MGI Symbol;Acc:MGI:106664]
ENSMUSG00000026042	638.829	603.734	636.369	644.631	1365.1	1085.74	1394.2	1300.38	1286.35	630.891	-1.02672	1.51383e-20	Col5a2	collagen, type V, alpha 2 [Source:MGI Symbol;Acc:MGI:88458]
ENSMUSG00000026308	948.832	994.551	985.481	803.162	2024.28	1743.34	1792.34	2057.85	1904.45	933.007	-1.02986	1.68264e-20	Klhl30	kelch-like 30 [Source:MGI Symbol;Acc:MGI:1918038]
ENSMUSG00000096586	136.18	243.735	111.129	187.182	10.285	6.16021	22.9144	7.11239	11.618	169.556	3.82717	1.8935e-20	Gm22918	predicted gene, 22918 [Source:MGI Symbol;Acc:MGI:5452695]
ENSMUSG00000101904	223.645	350.194	246.37	129.881	29.92	21.5607	34.3716	13.0394	24.7229	237.523	3.24021	1.8935e-20	Gm29427	predicted gene 29427 [Source:MGI Symbol;Acc:MGI:5580133]
ENSMUSG00000093577	414.076	274.552	317.66	421.159	78.54	107.034	114.572	94.8319	98.7444	356.862	1.85061	2.13168e-20	Gm20632	predicted gene 20632 [Source:MGI Symbol;Acc:MGI:5313079]
ENSMUSG00000032523	1909.84	1907.86	1987.74	1797.33	3090.18	3005.41	3074.11	2872.22	3010.48	1900.69	-0.664182	2.40667e-20	Hhatl	hedgehog acyltransferase-like [Source:MGI Symbol;Acc:MGI:1922020]
ENSMUSG00000079227	6.64293	12.607	6.2903	9.55008	91.6301	108.574	306.48	221.669	182.088	8.77258	-4.39494	2.41834e-20	Ccr5	chemokine (C-C motif) receptor 5 [Source:MGI Symbol;Acc:MGI:107182]
ENSMUSG00000029131	3901.62	4093.07	3908.38	4051.15	2663.82	2404.02	2350.16	2309.16	2431.79	3988.55	0.71365	2.66964e-20	Dnajb6	DnaJ heat shock protein family (Hsp40) member B6 [Source:MGI Symbol;Acc:MGI:1344381]
ENSMUSG00000024440	126.216	127.471	126.854	72.5806	807.84	512.068	433.225	476.53	557.416	113.28	-2.30315	3.01859e-20	Pcdh12	protocadherin 12 [Source:MGI Symbol;Acc:MGI:1855700]
ENSMUSG00000038393	15252.2	15538.8	13908.9	13615.6	35730.1	30412.2	30855.7	25649.6	30661.9	14578.9	-1.07268	3.2221e-20	Txnip	thioredoxin interacting protein [Source:MGI Symbol;Acc:MGI:1889549]
ENSMUSG00000029718	815.974	589.727	696.127	601.655	1573.61	1539.28	1401.36	1495.97	1502.56	675.871	-1.15162	4.39309e-20	Pcolce	procollagen C-endopeptidase enhancer protein [Source:MGI Symbol;Acc:MGI:105099]
ENSMUSG00000034209	53.1435	64.4357	52.4192	44.8854	183.26	252.569	215.539	171.883	205.813	53.7209	-1.95431	4.5988e-20	Rasl10a	RAS-like, family 10, member A [Source:MGI Symbol;Acc:MGI:1922918]
ENSMUSG00000034135	8106.59	7571.19	7292.56	7619.06	3952.25	3752.34	3973.5	2916.08	3648.54	7647.35	1.06702	5.14648e-20	Sik3	SIK family kinase 3 [Source:MGI Symbol;Acc:MGI:2446296]
ENSMUSG00000044948	1672.91	1470.81	1703.62	1241.51	713.405	595.231	690.296	606.924	651.464	1522.22	1.22369	5.16727e-20	Cfap43	cilia and flagella associated protein 43 [Source:MGI Symbol;Acc:MGI:1289258]
ENSMUSG00000020572	14789.4	16736.5	15724.7	15519.8	8934.87	9988.02	9636.22	8633.26	9298.09	15692.6	0.754747	6.09256e-20	Nampt	nicotinamide phosphoribosyltransferase [Source:MGI Symbol;Acc:MGI:1929865]
ENSMUSG00000003948	215.895	175.097	231.693	252.122	564.74	617.561	529.179	742.059	613.385	218.702	-1.47999	6.84368e-20	Mmd	monocyte to macrophage differentiation-associated [Source:MGI Symbol;Acc:MGI:1914718]
ENSMUSG00000022895	1390.59	1249.49	1127.01	1173.71	2848.01	2822.15	3205.87	2278.34	2788.59	1235.2	-1.17585	8.57271e-20	Ets2	E26 avian leukemia oncogene 2, 3' domain [Source:MGI Symbol;Acc:MGI:95456]
ENSMUSG00000020919	5027.59	5286.53	4649.58	4815.15	3185.55	2929.18	2841.39	3031.06	2996.79	4944.71	0.72249	9.95181e-20	Stat5b	signal transducer and activator of transcription 5B [Source:MGI Symbol;Acc:MGI:103035]
ENSMUSG00000049092	556.899	432.84	493.789	566.32	180.455	216.378	188.328	234.709	204.967	512.462	1.32824	1.10407e-19	Gpr137c	G protein-coupled receptor 137C [Source:MGI Symbol;Acc:MGI:1917963]
ENSMUSG00000049287	551.363	544.902	570.321	555.815	1044.4	1007.96	970.998	904.459	981.954	555.6	-0.822179	1.12463e-19	Iba57	IBA57 homolog, iron-sulfur cluster assembly [Source:MGI Symbol;Acc:MGI:3041174]
ENSMUSG00000014599	641.043	421.634	523.144	535.76	1174.36	1506.94	1578.23	1326.46	1396.5	530.395	-1.39548	1.21238e-19	Csf1	colony stimulating factor 1 (macrophage) [Source:MGI Symbol;Acc:MGI:1339753]
ENSMUSG00000027999	3377.93	3632.21	3345.39	3790.43	2058.87	1739.49	2040.1	1740.16	1894.66	3536.49	0.899866	1.45824e-19	Pla2g12a	phospholipase A2, group XIIA [Source:MGI Symbol;Acc:MGI:1913600]
ENSMUSG00000019539	272.36	200.311	234.838	201.507	561.935	532.088	547.797	682.789	581.153	227.254	-1.35091	2.2741e-19	Rcn3	reticulocalbin 3, EF-hand calcium binding domain [Source:MGI Symbol;Acc:MGI:1277122]
ENSMUSG00000034205	168.288	110.661	130	86.9058	460.955	395.794	492.66	397.108	436.629	123.964	-1.81849	2.30766e-19	Loxl2	lysyl oxidase-like 2 [Source:MGI Symbol;Acc:MGI:2137913]
ENSMUSG00000026856	120.68	96.6535	87.0159	116.511	325.38	331.111	334.407	252.49	310.847	105.215	-1.56335	2.81361e-19	Dolpp1	dolichyl pyrophosphate phosphatase 1 [Source:MGI Symbol;Acc:MGI:1914093]
ENSMUSG00000062077	9563.61	10923.3	10750.1	10939.6	5753.99	5447.94	6355.88	5017.79	5643.9	10544.2	0.901303	3.41971e-19	Trim54	tripartite motif-containing 54 [Source:MGI Symbol;Acc:MGI:1889623]
ENSMUSG00000052713	192.645	155.486	181.37	169.036	431.035	355.752	414.607	437.412	409.702	174.635	-1.22499	3.52925e-19	Zfp608	zinc finger protein 608 [Source:MGI Symbol;Acc:MGI:2442338]
ENSMUSG00000072612	91.8939	137.276	95.4029	128.926	20.57	9.24032	16.4697	21.3372	16.9043	113.375	2.77208	4.79298e-19	Gm10382	predicted gene 10382 [Source:MGI Symbol;Acc:MGI:3647829]
ENSMUSG00000028124	2379.28	1966.69	2037.01	2962.44	903.211	890.151	1044.04	905.644	935.761	2336.35	1.32019	5.0277e-19	Gclm	glutamate-cysteine ligase, modifier subunit [Source:MGI Symbol;Acc:MGI:104995]
ENSMUSG00000025006	32155.1	34697.2	33443.4	32116	18847.7	17244.7	16209.1	13518.3	16455	33102.9	1.00832	5.21278e-19	Sorbs1	sorbin and SH3 domain containing 1 [Source:MGI Symbol;Acc:MGI:700014]
ENSMUSG00000059408	33.2147	29.4163	29.3547	21.0102	149.6	155.545	104.547	144.619	138.578	28.249	-2.30037	5.25813e-19	Mrgprh	MAS-related GPR, member H [Source:MGI Symbol;Acc:MGI:1934134]
ENSMUSG00000031799	1639.7	1750.97	1999.27	1710.42	3164.98	3105.52	3264.59	2952.83	3121.98	1775.09	-0.814778	7.57572e-19	Tpm4	tropomyosin 4 [Source:MGI Symbol;Acc:MGI:2449202]
ENSMUSG00000021255	2321.71	2246.84	2214.19	2045.63	1247.29	1369.11	1166.49	1315.79	1274.67	2207.09	0.79221	1.50987e-18	Esrrb	estrogen related receptor, beta [Source:MGI Symbol;Acc:MGI:1346832]
ENSMUSG00000048371	726.294	581.322	573.466	501.379	1523.12	1537.74	1196.56	1523.24	1445.16	595.615	-1.27884	1.75245e-18	Pdp2	pyruvate dehyrogenase phosphatase catalytic subunit 2 [Source:MGI Symbol;Acc:MGI:1918878]
ENSMUSG00000112734	2564.17	3597.19	2606.28	2374.15	1191.19	1089.59	1236.66	1147.47	1166.23	2785.45	1.25513	2.18078e-18	Gm47644	predicted gene, 47644 [Source:MGI Symbol;Acc:MGI:6096722]
ENSMUSG00000020530	3506.36	3853.53	3745.88	3976.65	2438.48	2400.17	2469.74	2459.7	2442.02	3770.61	0.626825	2.1857e-18	Ggnbp2	gametogenetin binding protein 2 [Source:MGI Symbol;Acc:MGI:2387356]
ENSMUSG00000109029	67.5365	180.7	92.2578	71.6256	5.61	6.16021	7.87682	5.92699	6.39351	103.03	3.98762	2.79674e-18	Gm44717	predicted gene 44717 [Source:MGI Symbol;Acc:MGI:5753293]
ENSMUSG00000041143	776.116	776.03	827.175	813.667	480.59	398.874	442.534	424.373	436.593	798.247	0.871725	2.79674e-18	Tmco4	transmembrane and coiled-coil domains 4 [Source:MGI Symbol;Acc:MGI:1924306]
ENSMUSG00000087242	276.789	479.065	130	149.936	18.7	11.5504	27.2108	10.6686	17.0325	258.948	3.90542	2.96186e-18	C78197	expressed sequence C78197 [Source:MGI Symbol;Acc:MGI:2144636]
ENSMUSG00000032802	2216.53	2860.38	1758.14	4055.92	650.76	651.443	785.534	657.896	686.408	2722.74	1.98765	3.15623e-18	Srxn1	sulfiredoxin 1 homolog (S. cerevisiae) [Source:MGI Symbol;Acc:MGI:104971]
ENSMUSG00000049940	2681.53	2856.18	2682.81	2576.61	1579.22	1583.94	1664.87	1791.14	1654.79	2699.29	0.70633	3.41708e-18	Pgrmc2	progesterone receptor membrane component 2 [Source:MGI Symbol;Acc:MGI:1918054]
ENSMUSG00000040485	482.72	570.116	372.176	387.733	114.07	92.4032	146.795	67.5677	105.209	453.186	2.09522	3.70204e-18	Lrrc52	leucine rich repeat containing 52 [Source:MGI Symbol;Acc:MGI:1924118]
ENSMUSG00000101970	1369.55	1185.06	1304.19	1536.61	738.65	693.024	718.223	695.829	711.432	1348.85	0.924307	3.80171e-18	1810026B05Rik	RIKEN cDNA 1810026B05 gene [Source:MGI Symbol;Acc:MGI:1916420]
ENSMUSG00000021690	4041.12	5652.13	4740.79	5083.51	2277.66	2080.61	2312.21	2554.53	2306.25	4879.39	1.08141	5.55021e-18	Jmy	junction-mediating and regulatory protein [Source:MGI Symbol;Acc:MGI:1913096]
ENSMUSG00000063445	304.468	460.855	337.58	386.778	129.03	100.874	142.499	104.315	119.179	372.42	1.63719	5.59766e-18	Nmral1	NmrA-like family domain containing 1 [Source:MGI Symbol;Acc:MGI:1915074]
ENSMUSG00000034472	645.472	431.439	471.773	524.3	159.885	192.507	209.81	146.989	177.298	518.246	1.54193	5.82437e-18	Rasd2	RASD family, member 2 [Source:MGI Symbol;Acc:MGI:1922391]
ENSMUSG00000004730	110.716	124.669	131.048	105.051	315.095	300.31	458.288	361.546	358.81	117.871	-1.60968	6.98698e-18	Adgre1	adhesion G protein-coupled receptor E1 [Source:MGI Symbol;Acc:MGI:106912]
ENSMUSG00000040435	1917.59	2620.85	1996.12	2479.2	1099.56	787.737	872.895	800.144	890.084	2253.44	1.33978	7.07641e-18	Ppp1r15a	protein phosphatase 1, regulatory subunit 15A [Source:MGI Symbol;Acc:MGI:1927072]
ENSMUSG00000038178	1582.13	1371.36	1736.12	1943.44	766.7	619.872	745.434	560.693	673.175	1658.26	1.30013	7.44192e-18	Slc43a2	solute carrier family 43, member 2 [Source:MGI Symbol;Acc:MGI:2442746]
ENSMUSG00000036446	470.541	554.707	677.256	459.359	1634.38	1740.26	1309.7	2353.02	1759.34	540.466	-1.70218	8.01265e-18	Lum	lumican [Source:MGI Symbol;Acc:MGI:109347]
ENSMUSG00000024352	279.003	306.77	307.176	346.668	128.095	135.525	132.474	148.175	136.067	309.904	1.193	9.11837e-18	Spata24	spermatogenesis associated 24 [Source:MGI Symbol;Acc:MGI:1918492]
ENSMUSG00000022474	1220.09	1227.08	1011.69	1142.19	647.02	614.481	656.641	621.149	634.823	1150.26	0.856023	9.63783e-18	Pmm1	phosphomannomutase 1 [Source:MGI Symbol;Acc:MGI:1353418]
ENSMUSG00000024978	2605.14	2959.84	3121.04	2934.74	5610.94	7542.41	5389.9	6433.16	6244.1	2905.19	-1.10384	1.37901e-17	Gpam	glycerol-3-phosphate acyltransferase, mitochondrial [Source:MGI Symbol;Acc:MGI:109162]
ENSMUSG00000043831	370.897	344.591	396.289	398.238	650.76	704.574	685.284	726.649	691.817	377.504	-0.869708	1.46149e-17	Lysmd4	LysM, putative peptidoglycan-binding, domain containing 4 [Source:MGI Symbol;Acc:MGI:1922349]
ENSMUSG00000035764	381.969	354.396	356.451	369.588	656.37	619.872	630.146	649.598	638.997	365.601	-0.803547	1.70954e-17	Fbxo45	F-box protein 45 [Source:MGI Symbol;Acc:MGI:2447775]
ENSMUSG00000024914	9883.58	10336.3	10176.7	12776.1	5657.69	5321.65	5691.36	6103.62	5693.58	10793.2	0.923014	1.78343e-17	Drap1	Dr1 associated protein 1 (negative cofactor 2 alpha) [Source:MGI Symbol;Acc:MGI:1913806]
ENSMUSG00000030306	11992.7	12944.6	14621.8	13794.1	5163.07	6904.06	7131.39	6337.14	6383.92	13338.3	1.06293	2.31955e-17	Tmtc1	transmembrane and tetratricopeptide repeat containing 1 [Source:MGI Symbol;Acc:MGI:3039590]
ENSMUSG00000034842	18278	20861.8	19182.3	21267.1	10960.1	12368.2	11799.5	10253.7	11345.4	19897.3	0.810263	2.62905e-17	Art3	ADP-ribosyltransferase 3 [Source:MGI Symbol;Acc:MGI:1202729]
ENSMUSG00000027488	6372.79	6838.59	6501.03	6977.29	3728.78	2822.92	3511.63	2683.74	3186.77	6672.42	1.06575	2.66834e-17	Snta1	syntrophin, acidic 1 [Source:MGI Symbol;Acc:MGI:101772]
ENSMUSG00000023885	2163.38	2110.97	2074.75	1882.32	1047.2	1203.55	1211.6	992.178	1113.63	2057.86	0.883456	2.68955e-17	Thbs2	thrombospondin 2 [Source:MGI Symbol;Acc:MGI:98738]
ENSMUSG00000064343	65.3222	91.0504	67.0966	59.2105	299.2	194.817	250.626	226.411	242.764	70.6699	-1.79234	3.16563e-17	mt-Tq	mitochondrially encoded tRNA glutamine [Source:MGI Symbol;Acc:MGI:102477]
ENSMUSG00000020130	2057.1	2609.65	2281.28	2466.79	1224.85	1094.21	1278.91	1320.53	1229.63	2353.7	0.937084	3.96234e-17	Tbc1d15	TBC1 domain family, member 15 [Source:MGI Symbol;Acc:MGI:1913937]
ENSMUSG00000028369	261.289	201.712	211.774	214.877	617.1	560.579	475.474	472.974	531.532	222.413	-1.25602	4.26426e-17	Svep1	sushi, von Willebrand factor type A, EGF and pentraxin domain containing 1 [Source:MGI Symbol;Acc:MGI:1928849]
ENSMUSG00000048486	4844.91	4884.51	5536.52	5297.43	8336.46	7995.96	7755.09	8300.16	8096.92	5140.84	-0.6549	4.60371e-17	Fitm2	fat storage-inducing transmembrane protein 2 [Source:MGI Symbol;Acc:MGI:2444508]
ENSMUSG00000035121	339.897	228.326	236.935	241.617	88.8251	89.3231	93.8058	84.1633	89.0293	261.694	1.55334	4.84674e-17	Neil2	nei like 2 (E. coli) [Source:MGI Symbol;Acc:MGI:2686058]
ENSMUSG00000005534	10823.6	14394.4	15312.7	14437.8	6788.1	6408.16	7015.39	6935.76	6786.85	13742.1	1.01782	4.8981e-17	Insr	insulin receptor [Source:MGI Symbol;Acc:MGI:96575]
ENSMUSG00000035606	155.002	106.459	186.612	98.3659	433.84	505.138	418.188	503.794	465.24	136.61	-1.76473	5.0456e-17	Ky	kyphoscoliosis peptidase [Source:MGI Symbol;Acc:MGI:96709]
ENSMUSG00000023277	14066.4	13757	15146	14767.3	8825.47	6381.98	6811.31	6582.52	7150.32	14434.2	1.01348	6.66941e-17	Twf2	twinfilin actin binding protein 2 [Source:MGI Symbol;Acc:MGI:1346078]
ENSMUSG00000006301	4860.41	5273.92	4827.81	4920.2	2324.41	2193.04	2981.02	2106.45	2401.23	4970.59	1.04876	7.03408e-17	Tmbim1	transmembrane BAX inhibitor motif containing 1 [Source:MGI Symbol;Acc:MGI:1916910]
ENSMUSG00000003382	1860.02	1739.76	1817.9	1832.66	1201.48	1095.75	1206.59	1160.5	1166.08	1812.59	0.636998	7.03408e-17	Etv3	ets variant 3 [Source:MGI Symbol;Acc:MGI:1350926]
ENSMUSG00000033446	118.466	128.871	117.419	151.846	280.5	301.85	324.382	305.833	303.141	129.151	-1.22885	7.60368e-17	Lpar6	lysophosphatidic acid receptor 6 [Source:MGI Symbol;Acc:MGI:1914418]
ENSMUSG00000074582	4448.55	4593.14	4681.03	4773.13	3012.57	2729.74	2909.41	2475.11	2781.71	4623.97	0.732584	8.56231e-17	Arfgef2	ADP-ribosylation factor guanine nucleotide-exchange factor 2 (brefeldin A-inhibited) [Source:MGI Symbol;Acc:MGI:2139354]
ENSMUSG00000022897	3384.57	3422.1	3048.7	3260.4	2116.84	1900.43	2092.37	1853.96	1990.9	3278.94	0.718925	9.3771e-17	Dyrk1a	dual-specificity tyrosine-(Y)-phosphorylation regulated kinase 1a [Source:MGI Symbol;Acc:MGI:1330299]
ENSMUSG00000032035	1038.51	791.438	841.852	756.367	2499.26	1969.73	2262.8	1696.3	2107.02	857.042	-1.29816	1.03196e-16	Ets1	E26 avian leukemia oncogene 1, 5' domain [Source:MGI Symbol;Acc:MGI:95455]
ENSMUSG00000033308	645.472	771.828	760.078	833.722	398.31	388.093	375.223	401.85	390.869	752.775	0.947331	1.04741e-16	Dpyd	dihydropyrimidine dehydrogenase [Source:MGI Symbol;Acc:MGI:2139667]
ENSMUSG00000032812	773.902	690.583	722.336	681.876	1233.27	1138.87	1166.49	1234	1193.16	717.174	-0.733168	1.12815e-16	Arap1	ArfGAP with RhoGAP domain, ankyrin repeat and PH domain 1 [Source:MGI Symbol;Acc:MGI:1916960]
ENSMUSG00000115125	325.504	661.166	412.015	341.893	124.355	76.2326	65.8789	88.9049	88.8429	435.144	2.29447	1.13814e-16	Gm6852	predicted gene 6852 [Source:MGI Symbol;Acc:MGI:3646520]
ENSMUSG00000032245	1212.34	1152.84	1205.64	1099.21	704.055	740.766	742.57	720.722	727.028	1167.51	0.682312	1.29463e-16	Cln6	ceroid-lipofuscinosis, neuronal 6 [Source:MGI Symbol;Acc:MGI:2159324]
ENSMUSG00000018143	3878.37	4055.25	3456.52	3930.81	2031.76	1526.96	1969.92	1441.44	1742.52	3830.24	1.1355	1.43568e-16	Mafk	v-maf musculoaponeurotic fibrosarcoma oncogene family, protein K (avian) [Source:MGI Symbol;Acc:MGI:99951]
ENSMUSG00000024423	2474.49	3794.7	1707.82	2254.77	761.09	723.825	801.288	734.947	755.288	2557.95	1.75907	1.57788e-16	Impact	impact, RWD domain protein [Source:MGI Symbol;Acc:MGI:1098233]
ENSMUSG00000038028	3940.37	4373.22	4487.08	4095.08	2737.68	2226.92	2273.54	2316.27	2388.6	4223.94	0.822561	2.15479e-16	Tigar	Trp53 induced glycolysis repulatory phosphatase [Source:MGI Symbol;Acc:MGI:2442752]
ENSMUSG00000027408	79.7152	68.638	50.3224	47.7504	196.35	194.817	185.463	229.967	201.649	61.6065	-1.71778	2.18628e-16	Cpxm1	carboxypeptidase X 1 (M14 family) [Source:MGI Symbol;Acc:MGI:1934569]
ENSMUSG00000055541	16.6073	12.607	17.8225	8.59508	84.15	73.1525	109.559	94.8319	90.4235	13.908	-2.70577	2.37543e-16	Lair1	leukocyte-associated Ig-like receptor 1 [Source:MGI Symbol;Acc:MGI:105492]
ENSMUSG00000028954	2133.49	1993.3	2053.78	2101.97	1282.82	1352.17	1309.7	1140.35	1271.26	2070.64	0.702289	2.55401e-16	Nub1	negative regulator of ubiquitin-like proteins 1 [Source:MGI Symbol;Acc:MGI:1889001]
ENSMUSG00000021456	291.182	388.015	262.096	387.733	744.26	983.324	885.069	803.7	854.088	332.257	-1.36448	2.7126e-16	Fbp2	fructose bisphosphatase 2 [Source:MGI Symbol;Acc:MGI:95491]
ENSMUSG00000041633	137.287	191.906	198.145	150.891	425.425	421.205	390.977	514.463	438.017	169.557	-1.37002	2.85021e-16	Kctd12b	potassium channel tetramerisation domain containing 12b [Source:MGI Symbol;Acc:MGI:2444667]
ENSMUSG00000018932	3455.43	3630.81	3211.2	3752.23	2146.76	2200.74	2303.61	2107.64	2189.69	3512.42	0.681069	2.91037e-16	Map2k3	mitogen-activated protein kinase kinase 3 [Source:MGI Symbol;Acc:MGI:1346868]
ENSMUSG00000040213	1481.37	1692.14	1579.91	1655.98	943.416	934.812	983.171	1043.15	976.137	1602.35	0.715841	3.10545e-16	Kyat3	kynurenine aminotransferase 3 [Source:MGI Symbol;Acc:MGI:2677849]
ENSMUSG00000062270	7884.06	8446.68	8057.88	8901.63	5037.78	5123.76	5663.44	5384.08	5302.26	8322.56	0.650384	3.26059e-16	Morf4l1	mortality factor 4 like 1 [Source:MGI Symbol;Acc:MGI:1096551]
ENSMUSG00000015365	3493.08	3810.11	3470.15	3849.64	1912.08	2006.69	1922.66	2375.54	2054.24	3655.74	0.832585	4.02724e-16	Mov10l1	Moloney leukemia virus 10-like 1 [Source:MGI Symbol;Acc:MGI:1891384]
ENSMUSG00000015340	146.145	123.268	95.4029	119.376	274.89	330.341	301.468	322.428	307.282	121.048	-1.34604	4.2516e-16	Cybb	cytochrome b-245, beta polypeptide [Source:MGI Symbol;Acc:MGI:88574]
ENSMUSG00000058297	2816.6	1837.82	1986.69	2191.74	877.966	816.228	1052.63	765.767	878.148	2208.21	1.32951	4.31932e-16	Spock2	sparc/osteonectin, cwcv and kazal-like domains proteoglycan 2 [Source:MGI Symbol;Acc:MGI:1891351]
ENSMUSG00000056708	1781.41	2894	2886.2	2577.57	942.481	1001.03	933.046	666.194	885.689	2534.8	1.51556	4.38632e-16	Ier5	immediate early response 5 [Source:MGI Symbol;Acc:MGI:1337072]
ENSMUSG00000021273	2701.46	2619.45	2481.52	2777.16	1449.25	1674.81	1335.48	1567.1	1506.66	2644.9	0.812428	4.57132e-16	Fdft1	farnesyl diphosphate farnesyl transferase 1 [Source:MGI Symbol;Acc:MGI:102706]
ENSMUSG00000014195	4568.12	4822.87	4581.44	4990.87	3045.3	2983.85	3200.14	2738.27	2991.89	4740.83	0.663342	4.7231e-16	Dnajc7	DnaJ heat shock protein family (Hsp40) member C7 [Source:MGI Symbol;Acc:MGI:1928373]
ENSMUSG00000039891	39693.7	45946.9	43975.5	41315.6	28730.7	27928.1	27644.8	28606	28227.4	42732.9	0.598232	5.49798e-16	Txlnb	taxilin beta [Source:MGI Symbol;Acc:MGI:2671945]
ENSMUSG00000045817	804.902	818.053	721.288	764.007	1194.93	1376.04	1363.41	1330.02	1316.1	777.063	-0.761931	7.08281e-16	Zfp36l2	zinc finger protein 36, C3H type-like 2 [Source:MGI Symbol;Acc:MGI:107945]
ENSMUSG00000022340	111.823	63.0349	91.2094	61.1205	258.995	268.739	269.96	245.377	260.768	81.7969	-1.6708	8.2157e-16	Sybu	syntabulin (syntaxin-interacting) [Source:MGI Symbol;Acc:MGI:2442392]
ENSMUSG00000040451	4812.81	4664.58	3957.65	5131.26	2572.19	2218.45	2302.18	1848.04	2235.21	4641.57	1.0537	9.44085e-16	Sgms1	sphingomyelin synthase 1 [Source:MGI Symbol;Acc:MGI:2444110]
ENSMUSG00000075033	152.787	124.669	127.903	132.746	34.595	46.2016	47.2609	36.7473	41.2012	134.526	1.69325	9.9742e-16	Nxpe3	neurexophilin and PC-esterase domain family, member 3 [Source:MGI Symbol;Acc:MGI:2686598]
ENSMUSG00000078566	13904.8	15247.4	14793.7	14069.2	6612.32	4739.51	7500.17	4736.85	5897.21	14503.8	1.29809	1.01212e-15	Bnip3	BCL2/adenovirus E1B interacting protein 3 [Source:MGI Symbol;Acc:MGI:109326]
ENSMUSG00000029804	2900.75	3060.7	2980.56	2866.94	1757.8	1626.3	1982.81	1631.11	1749.5	2952.23	0.75369	1.17964e-15	Herc3	hect domain and RLD 3 [Source:MGI Symbol;Acc:MGI:1921248]
ENSMUSG00000025190	59297	58761.2	56796.2	57406.5	35764.7	30270.5	33129.9	25807.3	31243.1	58065.2	0.894077	1.72254e-15	Got1	glutamic-oxaloacetic transaminase 1, soluble [Source:MGI Symbol;Acc:MGI:95791]
ENSMUSG00000028986	2756.82	3381.47	3269.91	3807.62	1508.16	1398.37	1551.73	1849.22	1576.87	3303.95	1.06821	1.84386e-15	Klhl7	kelch-like 7 [Source:MGI Symbol;Acc:MGI:1196453]
ENSMUSG00000029657	742.901	844.668	836.61	646.541	1697.03	1792.62	1347.65	1641.78	1619.77	767.68	-1.07828	1.86206e-15	Hsph1	heat shock 105kDa/110kDa protein 1 [Source:MGI Symbol;Acc:MGI:105053]
ENSMUSG00000069516	2275.2	2587.23	2523.46	2467.74	4284.17	4775.71	6126.74	6231.64	5354.56	2463.41	-1.12011	1.94079e-15	Lyz2	lysozyme 2 [Source:MGI Symbol;Acc:MGI:96897]
ENSMUSG00000028479	1267.69	1339.14	1128.06	1038.09	580.635	686.864	583.601	587.958	609.764	1193.25	0.9662	2.04733e-15	Gne	glucosamine (UDP-N-acetyl)-2-epimerase/N-acetylmannosamine kinase [Source:MGI Symbol;Acc:MGI:1354951]
ENSMUSG00000015312	1181.34	1301.32	1091.37	997.029	526.405	464.326	522.019	334.282	461.758	1142.76	1.3032	2.09617e-15	Gadd45b	growth arrest and DNA-damage-inducible 45 beta [Source:MGI Symbol;Acc:MGI:107776]
ENSMUSG00000054435	336.575	376.809	311.37	299.873	776.05	649.903	654.493	614.036	673.62	331.157	-1.02887	2.12313e-15	Gimap4	GTPase, IMAP family member 4 [Source:MGI Symbol;Acc:MGI:1349656]
ENSMUSG00000023886	1118.23	1164.04	1240.24	924.448	2263.64	2541.09	1947.72	2321.01	2268.36	1111.74	-1.02937	2.13369e-15	Smoc2	SPARC related modular calcium binding 2 [Source:MGI Symbol;Acc:MGI:1929881]
ENSMUSG00000040414	1647.45	1553.46	1392.25	1635.93	814.385	915.562	962.405	872.453	891.201	1557.27	0.804011	2.47483e-15	Slc25a28	solute carrier family 25, member 28 [Source:MGI Symbol;Acc:MGI:2180509]
ENSMUSG00000022665	1561.09	1120.62	1108.14	1082.98	3078.96	3473.59	2363.76	3334.53	3062.71	1218.21	-1.32979	2.47483e-15	Ccdc80	coiled-coil domain containing 80 [Source:MGI Symbol;Acc:MGI:1915146]
ENSMUSG00000019558	13973.4	13909.7	13764.2	13978.5	9432.29	8706.69	10012.2	8724.53	9218.92	13906.5	0.592897	2.67895e-15	Slc6a8	solute carrier family 6 (neurotransmitter transporter, creatine), member 8 [Source:MGI Symbol;Acc:MGI:2147834]
ENSMUSG00000040666	2511.03	3062.1	3124.18	2614.81	6477.68	5812.93	4772.64	6459.23	5880.62	2828.03	-1.05614	2.70112e-15	Sh3bgr	SH3-binding domain glutamic acid-rich protein [Source:MGI Symbol;Acc:MGI:1354740]
ENSMUSG00000025193	825.938	790.038	815.643	854.732	474.045	502.057	461.868	531.058	492.257	821.588	0.742749	2.8573e-15	Cutc	cutC copper transporter [Source:MGI Symbol;Acc:MGI:1913638]
ENSMUSG00000066357	331.04	264.747	296.693	316.108	532.015	559.039	581.453	577.289	562.449	302.147	-0.892478	2.88981e-15	Wdr6	WD repeat domain 6 [Source:MGI Symbol;Acc:MGI:1930140]
ENSMUSG00000097357	50.9292	61.6341	80.7256	58.2555	291.72	281.83	161.117	324.799	264.866	62.8861	-2.07001	3.41286e-15	Gm16793	predicted gene, 16793 [Source:MGI Symbol;Acc:MGI:4439717]
ENSMUSG00000001785	1109.37	1089.8	1037.9	1009.44	652.63	665.303	669.53	699.385	671.712	1061.63	0.660448	3.61854e-15	Pwp1	PWP1 homolog, endonuclein [Source:MGI Symbol;Acc:MGI:1914735]
ENSMUSG00000047714	5061.92	5223.49	5177.97	5500.85	3736.26	3554.44	3717.86	3723.34	3682.98	5241.06	0.509314	3.74764e-15	Ppp1r2	protein phosphatase 1, regulatory inhibitor subunit 2 [Source:MGI Symbol;Acc:MGI:1914099]
ENSMUSG00000104263	44.2862	29.4163	18.8709	33.4253	115.005	214.837	168.994	154.102	163.234	31.4997	-2.37573	3.74764e-15	9430062P05Rik	RIKEN cDNA 9430062P05 gene [Source:MGI Symbol;Acc:MGI:2441746]
ENSMUSG00000027544	310.004	198.91	242.177	196.732	604.01	829.319	641.603	583.216	664.537	236.956	-1.48797	3.89369e-15	Nfatc2	nuclear factor of activated T cells, cytoplasmic, calcineurin dependent 2 [Source:MGI Symbol;Acc:MGI:102463]
ENSMUSG00000100876	116.251	154.085	120.564	123.196	44.88	23.1008	32.2234	30.8204	32.7561	128.524	1.97535	4.13904e-15	2810454H06Rik	RIKEN cDNA 2810454H06 gene [Source:MGI Symbol;Acc:MGI:1920063]
ENSMUSG00000030513	938.868	1138.83	1021.13	785.972	2493.65	2842.94	1833.87	2380.28	2387.68	971.199	-1.29885	4.25594e-15	Pcsk6	proprotein convertase subtilisin/kexin type 6 [Source:MGI Symbol;Acc:MGI:102897]
ENSMUSG00000015342	136.18	193.307	193.951	134.656	452.54	390.404	393.125	393.552	407.405	164.524	-1.31353	4.34249e-15	Xk	X-linked Kx blood group [Source:MGI Symbol;Acc:MGI:103569]
ENSMUSG00000038132	14478.3	13957.3	13802	13730.2	9670.71	9119.43	8685.27	7959.95	8858.84	13991.9	0.659218	4.54989e-15	Rbm24	RNA binding motif protein 24 [Source:MGI Symbol;Acc:MGI:3610364]
ENSMUSG00000045664	179.359	159.688	141.532	131.791	428.23	441.995	330.827	342.58	385.908	153.093	-1.33802	4.76984e-15	Cdc42ep2	CDC42 effector protein (Rho GTPase binding) 2 [Source:MGI Symbol;Acc:MGI:1929744]
ENSMUSG00000033863	9083.1	8795.47	9083.2	8782.26	6288.81	6311.91	5702.11	5619.97	5980.7	8936.01	0.579162	4.87864e-15	Klf9	Kruppel-like factor 9 [Source:MGI Symbol;Acc:MGI:1333856]
ENSMUSG00000022863	450.612	417.431	430.886	501.379	159.885	152.465	224.848	205.074	185.568	450.077	1.2801	4.95336e-15	Btg3	B cell translocation gene 3 [Source:MGI Symbol;Acc:MGI:109532]
ENSMUSG00000015568	367360	394667	393294	376002	220715	221435	253276	192295	221930	382831	0.786586	5.02803e-15	Lpl	lipoprotein lipase [Source:MGI Symbol;Acc:MGI:96820]
ENSMUSG00000034640	849.188	966.535	938.304	846.137	539.495	555.959	517.722	500.238	528.354	900.041	0.765715	5.11579e-15	Tiparp	TCDD-inducible poly(ADP-ribose) polymerase [Source:MGI Symbol;Acc:MGI:2159210]
ENSMUSG00000046329	1101.62	1000.15	1059.92	993.209	1539.01	1734.1	1642.68	1669.04	1646.21	1038.72	-0.664258	5.81348e-15	Slc25a23	solute carrier family 25 (mitochondrial carrier; phosphate carrier), member 23 [Source:MGI Symbol;Acc:MGI:1914222]
ENSMUSG00000045636	4272.51	3985.21	4233.37	3945.14	6767.53	6921.77	7470.81	5996.93	6789.26	4109.06	-0.724793	5.81348e-15	Mtus1	mitochondrial tumor suppressor 1 [Source:MGI Symbol;Acc:MGI:2142572]
ENSMUSG00000097451	132.859	144.28	163.548	127.971	323.51	342.662	304.332	284.496	313.75	142.164	-1.14564	5.91923e-15	Rian	RNA imprinted and accumulated in nucleus [Source:MGI Symbol;Acc:MGI:1922995]
ENSMUSG00000050592	250.217	165.292	183.467	185.272	432.905	590.61	501.969	670.935	549.105	196.062	-1.48258	6.04181e-15	Fam78a	family with sequence similarity 78, member A [Source:MGI Symbol;Acc:MGI:2443569]
ENSMUSG00000022041	3.32147	2.80155	6.2903	8.59508	57.97	72.3825	50.8413	67.5677	62.1904	5.2521	-3.50581	6.23194e-15	Chrna2	cholinergic receptor, nicotinic, alpha polypeptide 2 (neuronal) [Source:MGI Symbol;Acc:MGI:87886]
ENSMUSG00000031382	8744.32	11714.7	10959.8	10543.3	5684.8	4513.9	5788.03	5071.13	5264.47	10490.5	0.994614	6.30441e-15	Asb11	ankyrin repeat and SOCS box-containing 11 [Source:MGI Symbol;Acc:MGI:1916104]
ENSMUSG00000052316	238.038	263.346	299.838	216.787	856.46	1193.54	537.772	1020.63	902.101	254.502	-1.82566	6.87367e-15	Lrrc15	leucine rich repeat containing 15 [Source:MGI Symbol;Acc:MGI:1921738]
ENSMUSG00000031965	6173.5	7478.74	5907.64	6126.38	3422.1	2856.8	3211.6	3764.82	3313.83	6421.57	0.9547	7.3095e-15	Tbx20	T-box 20 [Source:MGI Symbol;Acc:MGI:1888496]
ENSMUSG00000100257	52.0363	134.474	135.242	54.4355	4.675	4.62016	6.44467	10.6686	6.60211	94.047	3.86674	7.60297e-15	C4bp-ps1	complement component 4 binding protein, pseudogene 1 [Source:MGI Symbol;Acc:MGI:99594]
ENSMUSG00000022129	474.97	708.793	500.079	556.77	252.45	161.706	189.044	150.546	188.436	560.153	1.56878	8.65233e-15	Dct	dopachrome tautomerase [Source:MGI Symbol;Acc:MGI:102563]
ENSMUSG00000042770	453.934	572.917	581.853	590.195	244.035	269.509	266.38	293.979	268.476	549.725	1.03603	8.69278e-15	Hebp1	heme binding protein 1 [Source:MGI Symbol;Acc:MGI:1333880]
ENSMUSG00000053483	394.147	375.408	350.16	387.733	657.305	673.773	645.9	605.738	645.679	376.862	-0.778215	9.26478e-15	Usp21	ubiquitin specific peptidase 21 [Source:MGI Symbol;Acc:MGI:1353665]
ENSMUSG00000108354	117.358	51.8287	66.0482	66.8506	4.675	5.39019	10.025	9.48319	7.39336	75.5215	3.35996	9.52666e-15	4931431B13Rik	RIKEN cDNA 4931431B13 gene [Source:MGI Symbol;Acc:MGI:1918223]
ENSMUSG00000030847	15722.7	14818.8	13013.6	14155.1	7879.25	6985.68	6796.27	5052.17	6678.34	14427.6	1.11102	9.5901e-15	Bag3	BCL2-associated athanogene 3 [Source:MGI Symbol;Acc:MGI:1352493]
ENSMUSG00000099696	158.323	114.864	110.08	233.022	27.115	7.70027	16.4697	26.0788	19.3409	154.072	3.02432	1.01861e-14	2900052N01Rik	RIKEN cDNA 2900052N01 gene [Source:MGI Symbol;Acc:MGI:1920290]
ENSMUSG00000025337	2113.56	2206.22	2319.03	2344.55	1489.46	1524.65	1477.26	1543.39	1508.69	2245.84	0.574862	1.02098e-14	Sbds	SBDS ribosome maturation factor [Source:MGI Symbol;Acc:MGI:1913961]
ENSMUSG00000006784	136.18	100.856	131.048	166.171	28.05	23.1008	8.5929	28.4496	22.0483	133.564	2.6313	1.07765e-14	Ttc25	tetratricopeptide repeat domain 25 [Source:MGI Symbol;Acc:MGI:1921657]
ENSMUSG00000022139	9462.86	11681.1	10843.4	11328.3	6537.52	6837.07	6817.75	6666.68	6714.76	10828.9	0.689339	1.18617e-14	Mbnl2	muscleblind like splicing factor 2 [Source:MGI Symbol;Acc:MGI:2145597]
ENSMUSG00000039450	563.542	551.906	556.692	690.471	263.67	291.07	282.134	330.726	291.9	590.653	1.02176	1.19308e-14	Dcxr	dicarbonyl L-xylulose reductase [Source:MGI Symbol;Acc:MGI:1915130]
ENSMUSG00000074794	3248.39	4314.39	5761.92	5087.33	2066.35	1578.55	1649.84	1768.61	1765.84	4603.01	1.38261	1.33848e-14	Arrdc3	arrestin domain containing 3 [Source:MGI Symbol;Acc:MGI:2145242]
ENSMUSG00000035629	1118.23	993.15	1082.98	1064.83	1877.48	2022.86	1862.51	1602.66	1841.38	1064.8	-0.79061	1.35971e-14	Rubcn	RUN domain and cysteine-rich domain containing, Beclin 1-interacting protein [Source:MGI Symbol;Acc:MGI:1915160]
ENSMUSG00000070476	235.824	184.902	223.306	236.842	441.32	581.37	564.267	444.524	507.87	220.219	-1.20427	1.39989e-14	Fam217b	family with sequence similarity 217, member B [Source:MGI Symbol;Acc:MGI:1918782]
ENSMUSG00000004939	1433.77	2061.94	1391.21	1532.79	345.95	337.272	691.012	384.069	439.576	1604.93	1.86594	1.4049e-14	Nmrk2	nicotinamide riboside kinase 2 [Source:MGI Symbol;Acc:MGI:1916814]
ENSMUSG00000087497	323.289	393.618	413.063	425.934	178.585	174.026	195.488	190.849	184.737	388.976	1.07556	1.47026e-14	2810001G20Rik	RIKEN cDNA 2810001G20 gene [Source:MGI Symbol;Acc:MGI:1913706]
ENSMUSG00000026921	1893.24	1697.74	1845.16	1677.95	3348.24	3044.69	3151.45	2670.7	3053.77	1778.52	-0.78028	1.57092e-14	Egfl7	EGF-like domain 7 [Source:MGI Symbol;Acc:MGI:2449923]
ENSMUSG00000037966	2962.75	3436.1	3186.04	3534.49	1676.46	1473.83	2025.06	1644.15	1704.87	3279.84	0.943474	1.66892e-14	Ninj1	ninjurin 1 [Source:MGI Symbol;Acc:MGI:1196617]
ENSMUSG00000036890	658.758	708.793	652.095	680.921	353.43	381.933	362.334	432.67	382.592	675.141	0.822539	1.71556e-14	Gtdc1	glycosyltransferase-like domain containing 1 [Source:MGI Symbol;Acc:MGI:2444269]
ENSMUSG00000026812	3261.68	3027.08	3080.15	3099.96	2172.94	1937.39	1858.93	1798.25	1941.88	3117.22	0.682699	1.85052e-14	Tsc1	tuberous sclerosis 1 [Source:MGI Symbol;Acc:MGI:1929183]
ENSMUSG00000035530	25107	28952.6	26226.4	25981	16974	15497.6	18047.2	17053.1	16893	26566.7	0.653133	1.86006e-14	Eif1	eukaryotic translation initiation factor 1 [Source:MGI Symbol;Acc:MGI:105125]
ENSMUSG00000031304	38.7504	21.0116	42.9837	40.1104	154.275	139.375	148.228	109.057	137.734	35.714	-1.93045	1.89235e-14	Il2rg	interleukin 2 receptor, gamma chain [Source:MGI Symbol;Acc:MGI:96551]
ENSMUSG00000036334	37.6433	29.4163	29.3547	22.9202	106.59	105.494	100.967	116.169	107.305	29.8336	-1.85014	1.96109e-14	Igsf10	immunoglobulin superfamily, member 10 [Source:MGI Symbol;Acc:MGI:1923481]
ENSMUSG00000106734	90.7868	127.471	121.613	114.601	256.19	269.509	244.182	261.973	257.964	113.618	-1.18595	1.9635e-14	Gm20559	predicted gene, 20559 [Source:MGI Symbol;Acc:MGI:5295666]
ENSMUSG00000037685	2785.6	3322.64	3173.46	2773.34	1647.47	1824.19	1643.39	1877.67	1748.18	3013.76	0.785739	2.01762e-14	Atp8a1	ATPase, aminophospholipid transporter (APLT), class I, type 8A, member 1 [Source:MGI Symbol;Acc:MGI:1330848]
ENSMUSG00000050017	1874.41	1836.42	1788.54	1805.92	1149.12	1271.31	1242.39	1248.22	1227.76	1826.32	0.572435	2.03345e-14	Pitpnb	phosphatidylinositol transfer protein, beta [Source:MGI Symbol;Acc:MGI:1927542]
ENSMUSG00000037214	110.716	100.856	107.984	100.276	272.085	219.458	251.342	222.855	241.435	104.958	-1.20216	2.0909e-14	Thap1	THAP domain containing, apoptosis associated protein 1 [Source:MGI Symbol;Acc:MGI:1921004]
ENSMUSG00000044442	1421.59	1486.22	1392.25	1315.05	895.731	921.722	918.724	934.094	917.568	1403.78	0.612353	2.12489e-14	N6amt1	N-6 adenine-specific DNA methyltransferase 1 (putative) [Source:MGI Symbol;Acc:MGI:1915018]
ENSMUSG00000001518	829.26	750.816	783.143	767.827	465.63	503.597	488.363	477.715	483.827	782.761	0.693419	2.15666e-14	Itfg2	integrin alpha FG-GAP repeat containing 2 [Source:MGI Symbol;Acc:MGI:1915450]
ENSMUSG00000078532	86.3581	112.062	84.9191	71.6256	246.84	246.409	284.998	201.518	244.941	88.7412	-1.48093	2.33422e-14	Nkain1	Na+/K+ transporting ATPase interacting 1 [Source:MGI Symbol;Acc:MGI:1914399]
ENSMUSG00000019851	6795.72	7375.09	6906.75	7180.71	5112.58	4911.23	4656.64	4951.41	4907.96	7064.57	0.525572	2.50084e-14	Perp	PERP, TP53 apoptosis effector [Source:MGI Symbol;Acc:MGI:1929938]
ENSMUSG00000020435	2406.96	2136.18	2043.3	1836.48	1222.05	1215.87	1061.94	1060.93	1140.2	2105.73	0.884297	2.75505e-14	Osbp2	oxysterol binding protein 2 [Source:MGI Symbol;Acc:MGI:1921559]
ENSMUSG00000022150	551.363	487.47	491.692	494.694	1001.39	1051.09	1563.19	1121.39	1184.26	506.305	-1.22667	2.76099e-14	Dab2	disabled 2, mitogen-responsive phosphoprotein [Source:MGI Symbol;Acc:MGI:109175]
ENSMUSG00000004937	4006.8	4205.13	4072.97	4242.15	3052.78	2880.67	2849.98	2799.91	2895.83	4131.76	0.512617	2.78925e-14	Sgta	small glutamine-rich tetratricopeptide repeat (TPR)-containing, alpha [Source:MGI Symbol;Acc:MGI:1098703]
ENSMUSG00000024095	1627.52	2074.55	2047.49	1959.68	1035.98	994.875	1162.91	1068.04	1065.45	1927.31	0.854569	2.7893e-14	Hnrnpll	heterogeneous nuclear ribonucleoprotein L-like [Source:MGI Symbol;Acc:MGI:1919942]
ENSMUSG00000053460	373.111	348.793	392.096	307.513	843.37	813.148	680.271	646.042	745.708	355.378	-1.07068	2.82174e-14	Ggcx	gamma-glutamyl carboxylase [Source:MGI Symbol;Acc:MGI:1927655]
ENSMUSG00000020990	760.616	962.333	997.013	883.383	392.7	370.383	368.063	509.721	410.217	900.836	1.13896	2.90348e-14	Cdkl1	cyclin-dependent kinase-like 1 (CDC2-related kinase) [Source:MGI Symbol;Acc:MGI:1918341]
ENSMUSG00000038074	226.967	224.124	244.273	213.922	396.44	408.884	433.225	448.081	421.658	227.322	-0.890358	2.91133e-14	Fkbp14	FK506 binding protein 14 [Source:MGI Symbol;Acc:MGI:2387639]
ENSMUSG00000068874	6242.14	6051.35	5710.55	5994.59	3853.14	4135.81	3781.59	4268.62	4009.79	5999.66	0.581707	3.27664e-14	Selenbp1	selenium binding protein 1 [Source:MGI Symbol;Acc:MGI:96825]
ENSMUSG00000043719	149.466	102.257	110.08	92.6358	339.405	383.473	256.355	374.586	338.455	113.61	-1.57326	3.28936e-14	Col6a6	collagen, type VI, alpha 6 [Source:MGI Symbol;Acc:MGI:2444259]
ENSMUSG00000070369	157.216	72.8404	101.693	84.9957	11.22	12.3204	17.9019	22.5226	15.9912	104.186	2.72325	3.65254e-14	Itgad	integrin, alpha D [Source:MGI Symbol;Acc:MGI:3578624]
ENSMUSG00000055912	466.113	477.665	529.434	402.059	1122.94	1115.77	953.096	822.666	1003.62	468.817	-1.10002	3.87347e-14	Tmem150a	transmembrane protein 150A [Source:MGI Symbol;Acc:MGI:2385244]
ENSMUSG00000030087	8323.6	9749.4	8510.78	7859.72	4709.6	3964.1	4129.6	2972.98	3944.07	8610.87	1.126	3.95811e-14	Klf15	Kruppel-like factor 15 [Source:MGI Symbol;Acc:MGI:1929988]
ENSMUSG00000032334	540.292	575.719	653.143	561.545	1122	974.084	1275.33	1333.57	1176.25	582.675	-1.01233	4.01518e-14	Loxl1	lysyl oxidase-like 1 [Source:MGI Symbol;Acc:MGI:106096]
ENSMUSG00000023074	2288.49	2753.93	2521.36	2415.22	1567.06	1190.46	1311.13	1378.62	1361.82	2494.75	0.873662	4.04775e-14	Mospd1	motile sperm domain containing 1 [Source:MGI Symbol;Acc:MGI:1917630]
ENSMUSG00000042148	3863.97	4108.48	3959.75	3922.22	2781.63	2422.5	2427.49	2247.51	2469.78	3963.6	0.681943	4.12448e-14	Cox10	heme A:farnesyltransferase cytochrome c oxidase assembly factor 10 [Source:MGI Symbol;Acc:MGI:1917633]
ENSMUSG00000109696	167.18	205.914	171.935	147.071	57.97	66.9923	62.2985	69.9385	64.2998	173.025	1.42514	4.17468e-14	Gm36670	predicted gene, 36670 [Source:MGI Symbol;Acc:MGI:5595829]
ENSMUSG00000023959	19394	25582.4	25556.5	23071.1	12754.3	11105.3	13672	11327.7	12214.8	23401	0.93784	4.2215e-14	Clic5	chloride intracellular channel 5 [Source:MGI Symbol;Acc:MGI:1917912]
ENSMUSG00000020914	6.64293	0	5.24192	5.73005	78.54	61.6021	42.9645	87.7195	67.7065	4.40373	-3.86356	4.78123e-14	Top2a	topoisomerase (DNA) II alpha [Source:MGI Symbol;Acc:MGI:98790]
ENSMUSG00000033228	2984.89	3053.69	3067.57	3330.11	2076.64	2162.24	2142.5	2163.35	2136.18	3109.07	0.541873	5.17326e-14	Scaf11	SR-related CTD-associated factor 11 [Source:MGI Symbol;Acc:MGI:1919443]
ENSMUSG00000023259	217.002	154.085	187.661	200.552	394.57	505.908	388.829	456.378	436.421	189.825	-1.19575	5.17326e-14	Slc26a6	solute carrier family 26, member 6 [Source:MGI Symbol;Acc:MGI:2159728]
ENSMUSG00000020250	3369.07	3856.34	3815.07	4432.19	2091.6	1928.92	2370.21	1999.77	2097.62	3868.17	0.882682	5.61492e-14	Txnrd1	thioredoxin reductase 1 [Source:MGI Symbol;Acc:MGI:1354175]
ENSMUSG00000032263	2525.42	3076.1	2998.38	3050.3	1791.46	1774.14	1818.83	1827.88	1803.08	2912.55	0.691807	6.2761e-14	Bckdhb	branched chain ketoacid dehydrogenase E1, beta polypeptide [Source:MGI Symbol;Acc:MGI:88137]
ENSMUSG00000026548	28.786	19.6109	27.258	19.1002	86.02	88.5531	99.5344	112.613	96.6801	23.6888	-2.021	6.31384e-14	Slamf9	SLAM family member 9 [Source:MGI Symbol;Acc:MGI:1923692]
ENSMUSG00000026837	994.226	680.777	757.982	704.796	1722.27	1654.02	1967.06	1513.75	1714.27	784.445	-1.128	6.59621e-14	Col5a1	collagen, type V, alpha 1 [Source:MGI Symbol;Acc:MGI:88457]
ENSMUSG00000010095	3154.29	3010.27	2317.98	3215.51	1210.83	1105.76	1586.11	1044.34	1236.76	2924.51	1.24056	6.92703e-14	Slc3a2	solute carrier family 3 (activators of dibasic and neutral amino acid transport), member 2 [Source:MGI Symbol;Acc:MGI:96955]
ENSMUSG00000047022	242.467	229.727	244.273	201.507	88.8251	105.494	94.5219	112.613	100.363	229.494	1.19677	7.36473e-14	Mipol1	mirror-image polydactyly 1 [Source:MGI Symbol;Acc:MGI:1920740]
ENSMUSG00000047242	624.436	631.75	637.417	634.126	376.805	384.243	379.52	417.26	389.457	631.932	0.701324	7.42694e-14	Taf9b	TATA-box binding protein associated factor 9B [Source:MGI Symbol;Acc:MGI:3039562]
ENSMUSG00000020088	9772.86	11508.8	11463	10952	7362.19	6746.2	7160.75	7022.3	7072.86	10924.2	0.627116	8.09047e-14	Sar1a	secretion associated Ras related GTPase 1A [Source:MGI Symbol;Acc:MGI:98230]
ENSMUSG00000031880	1488.02	1679.53	1303.14	1339.88	3138.8	3483.6	4277.83	6244.68	4286.23	1452.64	-1.56112	8.16209e-14	Rrad	Ras-related associated with diabetes [Source:MGI Symbol;Acc:MGI:1930943]
ENSMUSG00000002769	583.471	721.4	583.95	1029.5	116.875	198.667	202.649	253.675	192.967	729.58	1.92119	8.22621e-14	Gnmt	glycine N-methyltransferase [Source:MGI Symbol;Acc:MGI:1202304]
ENSMUSG00000020034	11423.6	11337.9	10258.4	9670.41	7094.78	5817.55	5909.77	6064.5	6221.65	10672.6	0.77851	8.47723e-14	Tcp11l2	t-complex 11 (mouse) like 2 [Source:MGI Symbol;Acc:MGI:2444679]
ENSMUSG00000058135	12386.9	10846.2	9554.97	10373.3	6442.15	6600.67	6219.11	5730.21	6248.04	10790.3	0.788037	9.02031e-14	Gstm1	glutathione S-transferase, mu 1 [Source:MGI Symbol;Acc:MGI:95860]
ENSMUSG00000108626	142.823	229.727	264.193	173.812	65.45	41.5814	45.8288	59.2699	53.0325	202.639	1.94279	9.07834e-14	Gm40457	predicted gene, 40457 [Source:MGI Symbol;Acc:MGI:5623342]
ENSMUSG00000054717	903.439	864.279	1138.54	1116.4	504.9	454.316	519.154	545.283	505.913	1005.67	0.99418	9.0885e-14	Hmgb2	high mobility group box 2 [Source:MGI Symbol;Acc:MGI:96157]
ENSMUSG00000031700	853.617	788.637	871.207	811.757	1589.5	1844.98	1414.25	1379.8	1557.13	831.304	-0.905712	9.46533e-14	Gpt2	glutamic pyruvate transaminase (alanine aminotransferase) 2 [Source:MGI Symbol;Acc:MGI:1915391]
ENSMUSG00000043639	15865.5	15229.2	15624.1	14990.8	9586.56	10718.8	8610.09	8623.77	9384.8	15427.4	0.716973	1.00221e-13	Rbm20	RNA binding motif protein 20 [Source:MGI Symbol;Acc:MGI:1920963]
ENSMUSG00000022817	6578.72	7029.09	6541.92	6360.36	4418.81	4041.1	4657.35	4014.94	4283.05	6627.52	0.629254	1.01086e-13	Itgb5	integrin beta 5 [Source:MGI Symbol;Acc:MGI:96614]
ENSMUSG00000028869	1840.09	1884.04	1805.32	1883.28	1194.93	1252.83	1316.86	1156.95	1230.39	1853.18	0.588935	1.02274e-13	Gnl2	guanine nucleotide binding protein-like 2 (nucleolar) [Source:MGI Symbol;Acc:MGI:2385207]
ENSMUSG00000038451	240.253	217.12	231.693	244.482	85.085	64.6822	106.695	99.5734	89.009	233.387	1.39566	1.06806e-13	Spsb2	splA/ryanodine receptor domain and SOCS box containing 2 [Source:MGI Symbol;Acc:MGI:1315199]
ENSMUSG00000069844	449.505	470.661	506.369	471.774	820.93	756.166	764.052	877.195	804.586	474.577	-0.758812	1.13139e-13	Sco1	SCO1 cytochrome c oxidase assembly protein [Source:MGI Symbol;Acc:MGI:106362]
ENSMUSG00000031875	307.789	235.33	236.935	246.392	544.17	492.047	515.574	472.974	506.191	256.612	-0.979853	1.19277e-13	Cmtm3	CKLF-like MARVEL transmembrane domain containing 3 [Source:MGI Symbol;Acc:MGI:2447162]
ENSMUSG00000029084	229.181	232.529	247.419	242.572	447.865	475.877	585.749	439.783	487.318	237.925	-1.03654	1.19673e-13	Cd38	CD38 antigen [Source:MGI Symbol;Acc:MGI:107474]
ENSMUSG00000002981	4797.31	5383.18	5276.52	5100.7	3509.06	3604.5	3618.33	3362.97	3523.71	5139.43	0.543831	1.20665e-13	Clptm1	cleft lip and palate associated transmembrane protein 1 [Source:MGI Symbol;Acc:MGI:1927155]
ENSMUSG00000105442	35.429	70.0388	73.3869	186.227	0	1.54005	3.58037	0	1.28011	91.2703	5.97716	1.21431e-13	Gm42614	predicted gene 42614 [Source:MGI Symbol;Acc:MGI:5662751]
ENSMUSG00000031698	41065.5	48042.4	40112.2	41336.6	25829.4	26669.1	23440	27746.6	25921.3	42639.2	0.718054	1.23587e-13	Mylk3	myosin light chain kinase 3 [Source:MGI Symbol;Acc:MGI:2443063]
ENSMUSG00000086881	181.574	208.716	140.483	182.407	70.125	41.5814	60.1503	52.1575	56.0036	178.295	1.66917	1.24127e-13	Gm13594	predicted gene 13594 [Source:MGI Symbol;Acc:MGI:3702953]
ENSMUSG00000019996	1483.59	1455.41	1506.53	1706.6	896.666	971.004	845.685	761.026	868.595	1538.03	0.823323	1.26974e-13	Map7	microtubule-associated protein 7 [Source:MGI Symbol;Acc:MGI:1328328]
ENSMUSG00000020780	3959.19	4143.5	3710.23	3884.97	2500.19	2603.46	2741.85	2345.9	2547.85	3924.47	0.621946	1.3008e-13	Srp68	signal recognition particle 68 [Source:MGI Symbol;Acc:MGI:1917447]
ENSMUSG00000025980	7360.37	9264.73	8536.99	8550.19	13816.5	14853.8	12971	13926.1	13891.8	8428.07	-0.72109	1.34203e-13	Hspd1	heat shock protein 1 (chaperonin) [Source:MGI Symbol;Acc:MGI:96242]
ENSMUSG00000061751	1545.59	1280.31	1366.04	1550.93	705.925	783.117	890.797	733.761	778.4	1435.72	0.88227	1.38549e-13	Kalrn	kalirin, RhoGEF kinase [Source:MGI Symbol;Acc:MGI:2685385]
ENSMUSG00000030110	76.3937	58.8326	71.2901	41.0654	174.845	184.036	190.476	181.366	182.681	61.8954	-1.56647	1.38549e-13	Ret	ret proto-oncogene [Source:MGI Symbol;Acc:MGI:97902]
ENSMUSG00000086451	343.218	329.182	342.822	439.304	169.235	135.525	173.29	167.141	161.298	363.631	1.17733	1.39724e-13	4933431K23Rik	RIKEN cDNA 4933431K23 gene [Source:MGI Symbol;Acc:MGI:1921725]
ENSMUSG00000027204	1101.62	945.524	855.481	806.027	2322.54	1669.42	2616.54	2040.07	2162.14	927.163	-1.22224	1.4084e-13	Fbn1	fibrillin 1 [Source:MGI Symbol;Acc:MGI:95489]
ENSMUSG00000074063	364.254	348.793	294.596	351.443	130.9	180.186	143.215	120.911	143.803	339.772	1.23214	1.44642e-13	Osgin1	oxidative stress induced growth inhibitor 1 [Source:MGI Symbol;Acc:MGI:1919089]
ENSMUSG00000000317	270.146	229.727	256.854	262.627	678.81	533.629	474.042	518.019	551.125	254.839	-1.10971	1.47339e-13	Bcl6b	B cell CLL/lymphoma 6, member B [Source:MGI Symbol;Acc:MGI:1278332]
ENSMUSG00000042870	3682.4	3300.23	3119.99	3079.9	1816.71	1824.96	2126.03	1647.7	1853.85	3295.63	0.828849	1.57413e-13	Tom1	target of myb1 trafficking protein [Source:MGI Symbol;Acc:MGI:1338026]
ENSMUSG00000026932	670.936	739.61	807.256	653.226	1273.47	1267.46	1211.6	1147.47	1225	717.757	-0.772635	1.5804e-13	Nacc2	nucleus accumbens associated 2, BEN and BTB (POZ) domain containing [Source:MGI Symbol;Acc:MGI:1915241]
ENSMUSG00000030116	399.683	490.272	545.16	440.259	922.846	887.841	822.77	886.678	880.034	468.843	-0.908679	1.60361e-13	Mfap5	microfibrillar associated protein 5 [Source:MGI Symbol;Acc:MGI:1354387]
ENSMUSG00000027533	584.578	724.201	661.53	706.706	1162.21	1085.74	1199.43	1316.98	1191.09	669.254	-0.831237	1.67093e-13	Fabp5	fatty acid binding protein 5, epidermal [Source:MGI Symbol;Acc:MGI:101790]
ENSMUSG00000038990	314.432	303.968	280.967	240.662	678.81	730.755	751.163	499.053	664.945	285.007	-1.22711	1.74077e-13	Cables2	CDK5 and Abl enzyme substrate 2 [Source:MGI Symbol;Acc:MGI:2182335]
ENSMUSG00000038612	13020.1	14668.9	14122.8	12913.6	8911.49	7855.81	8935.18	7419.41	8280.47	13681.4	0.724151	1.82449e-13	Mcl1	myeloid cell leukemia sequence 1 [Source:MGI Symbol;Acc:MGI:101769]
ENSMUSG00000036904	133.966	121.868	118.467	127.971	267.41	333.422	254.923	266.715	280.617	125.568	-1.16082	1.86652e-13	Fzd8	frizzled class receptor 8 [Source:MGI Symbol;Acc:MGI:108460]
ENSMUSG00000050708	8616.99	11244	9042.31	10635.9	3666.14	3033.14	5367.7	3702	3942.24	9884.82	1.32596	1.93053e-13	Ftl1	ferritin light polypeptide 1 [Source:MGI Symbol;Acc:MGI:95589]
ENSMUSG00000040350	295.611	371.206	314.515	232.067	949.961	1518.49	728.248	880.751	1019.36	303.35	-1.7514	1.9422e-13	Trim7	tripartite motif-containing 7 [Source:MGI Symbol;Acc:MGI:2137353]
ENSMUSG00000032816	387.504	414.63	342.822	279.817	743.325	792.357	686.716	713.61	734.002	356.193	-1.04791	2.08848e-13	Igdcc4	immunoglobulin superfamily, DCC subclass, member 4 [Source:MGI Symbol;Acc:MGI:1858497]
ENSMUSG00000071984	197.074	142.879	126.854	75.4457	475.915	621.412	408.163	561.879	516.842	135.563	-1.93414	2.16716e-13	Fndc1	fibronectin type III domain containing 1 [Source:MGI Symbol;Acc:MGI:1915905]
ENSMUSG00000016194	1108.26	1012.76	860.723	1272.07	381.48	514.378	526.315	449.266	467.86	1063.45	1.18327	2.18918e-13	Hsd11b1	hydroxysteroid 11-beta dehydrogenase 1 [Source:MGI Symbol;Acc:MGI:103562]
ENSMUSG00000034295	16888.6	17822.1	17898	16851.1	12956.3	12747	11999.3	12193	12473.9	17364.9	0.477197	2.22373e-13	Fhod3	formin homology 2 domain containing 3 [Source:MGI Symbol;Acc:MGI:1925847]
ENSMUSG00000007655	4288.01	3420.69	3718.62	3162.99	7425.77	7641.75	7319.72	5936.47	7080.93	3647.58	-0.957223	2.52309e-13	Cav1	caveolin 1, caveolae protein [Source:MGI Symbol;Acc:MGI:102709]
ENSMUSG00000021256	204.824	183.502	196.048	168.081	444.125	431.985	368.063	342.58	396.688	188.114	-1.07886	2.65314e-13	Vash1	vasohibin 1 [Source:MGI Symbol;Acc:MGI:2442543]
ENSMUSG00000058351	906.76	1109.41	1188.87	1221.46	447.865	436.605	494.808	627.076	501.588	1106.62	1.14483	2.74372e-13	Smim4	small integral membrane protein 4 [Source:MGI Symbol;Acc:MGI:1913737]
ENSMUSG00000045896	2855.35	3473.92	3142.01	3129.56	1937.32	1838.05	1934.83	2110.01	1955.05	3150.21	0.688538	2.81998e-13	Paip2b	poly(A) binding protein interacting protein 2B [Source:MGI Symbol;Acc:MGI:2386865]
ENSMUSG00000021686	2079.24	2220.23	1996.12	2133.49	1329.57	1328.3	1490.87	1300.38	1362.28	2107.27	0.627717	2.86471e-13	Ap3b1	adaptor-related protein complex 3, beta 1 subunit [Source:MGI Symbol;Acc:MGI:1333879]
ENSMUSG00000055296	7572.94	11239.8	9350.54	9831.81	3871.84	4413.79	4510.56	5272.65	4517.21	9498.78	1.07241	2.88427e-13	Tmem245	transmembrane protein 245 [Source:MGI Symbol;Acc:MGI:2445107]
ENSMUSG00000059552	303.361	215.72	204.435	224.427	497.42	536.709	562.835	477.715	518.67	236.985	-1.13105	2.89992e-13	Trp53	transformation related protein 53 [Source:MGI Symbol;Acc:MGI:98834]
ENSMUSG00000099342	50.9292	51.8287	49.274	37.2453	6.545	4.62016	5.7286	3.55619	5.11249	47.3193	3.18442	2.94712e-13	Gm18180	predicted gene, 18180 [Source:MGI Symbol;Acc:MGI:5010365]
ENSMUSG00000091049	45.3934	54.6303	44.0321	42.9754	5.61	6.16021	5.01252	5.92699	5.67743	46.7578	3.04249	3.1261e-13	Gm1979	predicted gene 1979 [Source:MGI Symbol;Acc:MGI:3780148]
ENSMUSG00000023861	7230.83	8704.42	8123.93	8083.19	5158.4	5186.13	4981.73	5504.99	5207.81	8035.59	0.625833	3.403e-13	Mpc1	mitochondrial pyruvate carrier 1 [Source:MGI Symbol;Acc:MGI:1915240]
ENSMUSG00000103983	14.393	29.4163	19.9193	33.4253	133.705	111.654	98.8183	93.6465	109.456	24.2885	-2.17364	3.4141e-13	Gm20045	predicted gene, 20045 [Source:MGI Symbol;Acc:MGI:5012230]
ENSMUSG00000097242	398.576	249.338	324.999	412.564	95.3701	125.514	143.931	100.759	116.394	346.369	1.569	3.46743e-13	Gm16907	predicted gene, 16907 [Source:MGI Symbol;Acc:MGI:4439831]
ENSMUSG00000045838	935.546	809.649	922.578	806.982	1572.67	1766.44	1637.66	1345.43	1580.55	868.689	-0.864372	3.67421e-13	Ccdc9b	coiled-coil domain containing 9B [Source:MGI Symbol;Acc:MGI:2685199]
ENSMUSG00000031586	8031.31	7501.16	7243.28	6731.85	4876.03	5009.02	4789.83	4522.29	4799.29	7376.9	0.619779	3.79382e-13	Rbpms	RNA binding protein gene with multiple splicing [Source:MGI Symbol;Acc:MGI:1334446]
ENSMUSG00000031389	29.8932	25.214	19.9193	19.1002	91.6301	80.8528	99.5344	88.9049	90.2305	23.5317	-1.95142	3.81054e-13	Arhgap4	Rho GTPase activating protein 4 [Source:MGI Symbol;Acc:MGI:2159577]
ENSMUSG00000053470	1943.06	1853.23	1636.53	1918.61	1175.3	1066.49	1195.85	1110.72	1137.09	1837.86	0.692349	3.85608e-13	Kdm3a	lysine (K)-specific demethylase 3A [Source:MGI Symbol;Acc:MGI:98847]
ENSMUSG00000064202	701.937	693.384	626.934	742.041	390.83	433.525	395.989	414.889	408.809	691.074	0.757746	4.02652e-13	4430402I18Rik	RIKEN cDNA 4430402I18 gene [Source:MGI Symbol;Acc:MGI:1918036]
ENSMUSG00000027255	2052.67	2063.34	1936.37	2115.34	1375.39	1405.3	1454.35	1316.98	1388	2041.93	0.555603	4.29257e-13	Arfgap2	ADP-ribosylation factor GTPase activating protein 2 [Source:MGI Symbol;Acc:MGI:1924288]
ENSMUSG00000018566	26034.8	23292.1	22564.4	22970.8	14842.2	15582.3	12289.3	13588.2	14075.5	23715.5	0.752646	4.5679e-13	Slc2a4	solute carrier family 2 (facilitated glucose transporter), member 4 [Source:MGI Symbol;Acc:MGI:95758]
ENSMUSG00000027381	1398.34	1484.82	1165.8	1297.86	704.055	648.362	821.338	643.671	704.357	1336.7	0.921768	4.61863e-13	Bcl2l11	BCL2-like 11 (apoptosis facilitator) [Source:MGI Symbol;Acc:MGI:1197519]
ENSMUSG00000039361	12326	12882.9	11238.7	11810.6	6308.45	6119.4	7132.82	4630.17	6047.71	12064.5	0.995888	4.63135e-13	Picalm	phosphatidylinositol binding clathrin assembly protein [Source:MGI Symbol;Acc:MGI:2385902]
ENSMUSG00000055322	118658	98827.5	101159	101587	57414.6	55667.5	58859.9	40985.1	53231.8	105058	0.980787	4.9451e-13	Tns1	tensin 1 [Source:MGI Symbol;Acc:MGI:104552]
ENSMUSG00000017817	28060.9	29982.2	29520.4	32642.2	20591.5	19219.1	18047.2	20456.4	19578.6	30051.4	0.618277	4.95046e-13	Jph2	junctophilin 2 [Source:MGI Symbol;Acc:MGI:1891496]
ENSMUSG00000038816	3095.61	2648.87	2912.41	5476.02	1156.6	1045.7	1298.24	1190.14	1172.67	3533.23	1.59155	4.96001e-13	Ctnnal1	catenin (cadherin associated protein), alpha-like 1 [Source:MGI Symbol;Acc:MGI:1859649]
ENSMUSG00000003809	3583.86	4039.84	3883.21	3836.27	2728.33	2728.2	2660.93	2641.07	2689.63	3835.8	0.511648	5.03107e-13	Gcdh	glutaryl-Coenzyme A dehydrogenase [Source:MGI Symbol;Acc:MGI:104541]
ENSMUSG00000035021	780.545	869.882	621.692	815.577	287.98	255.649	398.854	341.395	320.969	771.924	1.26508	5.04961e-13	Baz1a	bromodomain adjacent to zinc finger domain 1A [Source:MGI Symbol;Acc:MGI:1309478]
ENSMUSG00000036144	195.967	184.902	172.983	191.957	430.1	338.042	353.025	369.844	372.753	186.452	-0.997375	5.18748e-13	Meox2	mesenchyme homeobox 2 [Source:MGI Symbol;Acc:MGI:103219]
ENSMUSG00000099137	16.6073	19.6109	7.33869	16.2351	82.28	115.504	75.9039	69.9385	85.9066	14.948	-2.54469	5.3153e-13	Gm10603	predicted gene 10603 [Source:MGI Symbol;Acc:MGI:3642592]
ENSMUSG00000108414	408.54	474.863	454.999	424.024	230.01	229.468	266.38	225.226	237.771	440.606	0.884327	5.39598e-13	Snhg1	small nucleolar RNA host gene 1 [Source:MGI Symbol;Acc:MGI:3763743]
ENSMUSG00000074622	261.289	324.98	263.144	377.228	708.73	774.647	842.82	584.401	727.65	306.66	-1.24808	5.66695e-13	Mafb	v-maf musculoaponeurotic fibrosarcoma oncogene family, protein B (avian) [Source:MGI Symbol;Acc:MGI:104555]
ENSMUSG00000040705	16.6073	4.20233	5.24192	14.3251	85.085	85.473	64.4467	66.3823	75.3468	10.0942	-2.8649	5.77603e-13	A930016O22Rik	RIKEN cDNA A930016O22 gene [Source:MGI Symbol;Acc:MGI:3605623]
ENSMUSG00000024853	7581.8	7585.2	7199.25	7495.86	5040.59	5333.21	5066.23	4474.88	4978.73	7465.53	0.583881	5.85435e-13	Sf3b2	splicing factor 3b, subunit 2 [Source:MGI Symbol;Acc:MGI:2441856]
ENSMUSG00000028427	617.793	529.493	493.789	371.498	1596.05	1382.2	1657.71	972.027	1402	503.143	-1.4804	6.00835e-13	Aqp7	aquaporin 7 [Source:MGI Symbol;Acc:MGI:1314647]
ENSMUSG00000035342	4686.59	5505.05	5357.24	5712.86	3413.69	2971.53	3313.28	2816.51	3128.75	5315.44	0.764255	6.08592e-13	Lzts2	leucine zipper, putative tumor suppressor 2 [Source:MGI Symbol;Acc:MGI:2385095]
ENSMUSG00000036545	598.971	435.641	533.627	507.109	924.716	904.781	1026.85	951.875	952.056	518.837	-0.873737	6.2357e-13	Adamts2	a disintegrin-like and metallopeptidase (reprolysin type) with thrombospondin type 1 motif, 2 [Source:MGI Symbol;Acc:MGI:1347356]
ENSMUSG00000041313	4078.76	4899.91	3595.96	4142.83	2009.32	2379.38	1965.63	2421.77	2194.02	4179.36	0.929738	6.27945e-13	Slc7a1	solute carrier family 7 (cationic amino acid transporter, y+ system), member 1 [Source:MGI Symbol;Acc:MGI:88117]
ENSMUSG00000027293	21949.4	25235	24077.2	21605.2	15017	15884.9	14892.9	15819.1	15403.5	23216.7	0.591847	6.4119e-13	Ehd4	EH-domain containing 4 [Source:MGI Symbol;Acc:MGI:1919619]
ENSMUSG00000022965	2075.92	2909.41	2652.41	2145.9	4845.17	5575.76	4312.2	5427.94	5040.27	2445.91	-1.04357	6.50586e-13	Ifngr2	interferon gamma receptor 2 [Source:MGI Symbol;Acc:MGI:107654]
ENSMUSG00000022358	15574.4	20762.3	19334.3	15641.1	10253.2	8305.51	8710.34	7312.72	8645.45	17828	1.04398	6.56538e-13	Fbxo32	F-box protein 32 [Source:MGI Symbol;Acc:MGI:1914981]
ENSMUSG00000046675	403.005	483.268	420.402	500.424	252.45	244.868	234.873	226.411	239.651	451.775	0.913008	6.86474e-13	Tmem251	transmembrane protein 251 [Source:MGI Symbol;Acc:MGI:2443862]
ENSMUSG00000039031	225.86	225.525	274.677	207.237	576.895	448.156	466.165	624.705	528.98	233.325	-1.1776	6.91963e-13	Arhgap18	Rho GTPase activating protein 18 [Source:MGI Symbol;Acc:MGI:1921160]
ENSMUSG00000020532	1627.52	1339.14	1621.85	1502.23	705.925	609.861	552.094	884.307	688.047	1522.68	1.14964	7.04174e-13	Acaca	acetyl-Coenzyme A carboxylase alpha [Source:MGI Symbol;Acc:MGI:108451]
ENSMUSG00000020101	575.721	557.509	617.498	528.12	1018.22	976.394	1180.81	917.498	1023.23	569.712	-0.846476	7.33281e-13	Vsir	V-set immunoregulatory receptor [Source:MGI Symbol;Acc:MGI:1921298]
ENSMUSG00000052085	193.752	247.937	263.144	184.317	456.28	631.422	518.438	487.199	523.335	222.288	-1.23969	7.56698e-13	Dock8	dedicator of cytokinesis 8 [Source:MGI Symbol;Acc:MGI:1921396]
ENSMUSG00000036104	2867.53	3055.09	2919.75	2988.22	2171.07	2153.76	2178.3	2137.27	2160.1	2957.65	0.452843	8.06214e-13	Rab3gap1	RAB3 GTPase activating protein subunit 1 [Source:MGI Symbol;Acc:MGI:2445001]
ENSMUSG00000068196	421.826	424.435	469.676	368.633	793.815	842.409	689.58	759.84	771.411	421.143	-0.873972	8.2201e-13	Col8a1	collagen, type VIII, alpha 1 [Source:MGI Symbol;Acc:MGI:88463]
ENSMUSG00000086784	2577.46	2840.77	2690.15	2792.44	1866.26	1800.32	1882.56	1972.5	1880.41	2725.21	0.535815	8.43723e-13	Isoc2a	isochorismatase domain containing 2a [Source:MGI Symbol;Acc:MGI:3609243]
ENSMUSG00000033361	229.181	239.533	218.064	183.362	601.205	513.608	490.511	391.181	499.126	217.535	-1.20337	8.67772e-13	Prrg3	proline rich Gla (G-carboxyglutamic acid) 3 (transmembrane) [Source:MGI Symbol;Acc:MGI:2685214]
ENSMUSG00000037573	3025.86	3289.02	2584.27	2661.61	1698.9	1798.78	1641.96	1714.09	1713.43	2890.19	0.753512	9.701e-13	Tob1	transducer of ErbB-2.1 [Source:MGI Symbol;Acc:MGI:1349721]
ENSMUSG00000062991	75.2866	135.875	177.177	120.331	27.115	10.0103	16.4697	27.2642	20.2148	127.167	2.68081	9.80318e-13	Nrg1	neuregulin 1 [Source:MGI Symbol;Acc:MGI:96083]
ENSMUSG00000029833	1655.2	1637.51	1694.19	1574.81	1111.72	1169.67	1158.61	1102.42	1135.6	1640.43	0.529308	9.85279e-13	Trim24	tripartite motif-containing 24 [Source:MGI Symbol;Acc:MGI:109275]
ENSMUSG00000082676	47.6077	82.6458	61.8546	44.8854	9.35001	7.70027	8.5929	3.55619	7.29984	59.2484	2.97401	9.97782e-13	Gm11843	predicted gene 11843 [Source:MGI Symbol;Acc:MGI:3651166]
ENSMUSG00000024654	2973.82	3475.33	3239.51	3523.98	2175.75	2187.65	2205.51	2105.27	2168.54	3303.16	0.606676	1.03684e-12	Asrgl1	asparaginase like 1 [Source:MGI Symbol;Acc:MGI:1913764]
ENSMUSG00000027602	18515	20707.7	20520	22097	14118.5	13607.1	13234.5	13992.4	13738.1	20459.9	0.574709	1.03684e-12	Map1lc3a	microtubule-associated protein 1 light chain 3 alpha [Source:MGI Symbol;Acc:MGI:1915661]
ENSMUSG00000072568	89.6796	96.6535	88.0642	84.0407	276.76	258.729	174.006	285.681	248.794	89.6095	-1.47203	1.07072e-12	Fam84b	family with sequence similarity 84, member B [Source:MGI Symbol;Acc:MGI:3026924]
ENSMUSG00000046792	1305.34	1423.19	1345.08	1381.9	965.856	897.081	928.033	906.83	924.45	1363.87	0.560447	1.19193e-12	Zfp787	zinc finger protein 787 [Source:MGI Symbol;Acc:MGI:1914359]
ENSMUSG00000020520	294.503	298.365	277.822	267.402	589.05	511.298	534.908	458.749	523.501	284.523	-0.883612	1.22218e-12	Galnt10	polypeptide N-acetylgalactosaminyltransferase 10 [Source:MGI Symbol;Acc:MGI:1890480]
ENSMUSG00000052336	4.42862	4.20233	9.43545	11.4601	72.93	42.3515	118.868	94.8319	82.2455	7.38163	-3.43832	1.28841e-12	Cx3cr1	chemokine (C-X3-C motif) receptor 1 [Source:MGI Symbol;Acc:MGI:1333815]
ENSMUSG00000031617	879.082	833.462	786.288	767.827	502.095	505.138	518.438	531.058	514.182	816.664	0.667199	1.29784e-12	Tmem184c	transmembrane protein 184C [Source:MGI Symbol;Acc:MGI:2384562]
ENSMUSG00000068290	3547.33	3979.6	3999.58	4029.18	2402.02	2379.38	2727.53	2564.02	2518.24	3888.92	0.62686	1.33731e-12	Ddrgk1	DDRGK domain containing 1 [Source:MGI Symbol;Acc:MGI:1924256]
ENSMUSG00000030711	3766.54	3797.5	3471.2	3758.91	1953.22	1832.66	2122.45	1335.94	1811.07	3698.54	1.02889	1.34845e-12	Sult1a1	sulfotransferase family 1A, phenol-preferring, member 1 [Source:MGI Symbol;Acc:MGI:102896]
ENSMUSG00000038457	53.1435	49.0272	57.6611	49.6604	204.765	154.005	163.981	120.911	160.916	52.373	-1.62093	1.34923e-12	Tmem255b	transmembrane protein 255B [Source:MGI Symbol;Acc:MGI:2685533]
ENSMUSG00000019082	1159.19	1115.02	1035.8	1204.27	2029.89	2377.07	1790.9	1890.71	2022.14	1128.57	-0.841461	1.45122e-12	Slc25a22	solute carrier family 25 (mitochondrial carrier, glutamate), member 22 [Source:MGI Symbol;Acc:MGI:1915517]
ENSMUSG00000031701	11335.1	14351	13455	12977.6	8385.08	8180.76	7983.52	8416.33	8241.42	13029.6	0.660804	1.51774e-12	Dnaja2	DnaJ heat shock protein family (Hsp40) member A2 [Source:MGI Symbol;Acc:MGI:1931882]
ENSMUSG00000079523	368.683	445.447	471.773	461.269	832.15	823.159	1175.08	1174.73	1001.28	436.793	-1.19604	1.51774e-12	Tmsb10	thymosin, beta 10 [Source:MGI Symbol;Acc:MGI:109146]
ENSMUSG00000047419	31677.9	35861.3	34921.7	32927.7	23971.5	23374.9	24646.6	23764.9	23939.5	33847.2	0.499576	1.52074e-12	Cmya5	cardiomyopathy associated 5 [Source:MGI Symbol;Acc:MGI:1923719]
ENSMUSG00000021892	3456.54	3915.17	3600.15	3100.91	2246.81	1982.82	2065.16	2230.92	2131.43	3518.19	0.723005	1.54006e-12	Sh3bp5	SH3-domain binding protein 5 (BTK-associated) [Source:MGI Symbol;Acc:MGI:1344391]
ENSMUSG00000105622	76.3937	204.513	282.015	332.343	3.74	3.85013	0.716075	10.6686	4.7437	223.816	5.62622	1.65342e-12	Gm42615	predicted gene 42615 [Source:MGI Symbol;Acc:MGI:5662752]
ENSMUSG00000033715	102.965	137.276	104.838	90.7258	315.095	282.6	219.835	317.687	283.804	108.951	-1.38702	1.65356e-12	Akr1c14	aldo-keto reductase family 1, member C14 [Source:MGI Symbol;Acc:MGI:2145458]
ENSMUSG00000032011	110.716	88.2489	106.935	72.5806	235.62	244.098	209.094	225.226	228.51	94.6201	-1.27318	1.68716e-12	Thy1	thymus cell antigen 1, theta [Source:MGI Symbol;Acc:MGI:98747]
ENSMUSG00000026712	605.614	578.52	550.402	525.255	963.986	1161.2	1559.61	1201.99	1221.7	564.948	-1.1141	1.72975e-12	Mrc1	mannose receptor, C type 1 [Source:MGI Symbol;Acc:MGI:97142]
ENSMUSG00000033610	4121.94	5154.86	4748.13	4406.41	2937.77	2578.05	2525.6	2901.85	2735.82	4607.83	0.752362	1.78506e-12	Pank1	pantothenate kinase 1 [Source:MGI Symbol;Acc:MGI:1922985]
ENSMUSG00000029521	49.822	51.8287	47.1773	50.6154	169.235	144.765	126.745	120.911	140.414	49.8609	-1.49679	1.82037e-12	Chek2	checkpoint kinase 2 [Source:MGI Symbol;Acc:MGI:1355321]
ENSMUSG00000035944	2005.06	1679.53	1757.09	1738.12	1166.88	1117.31	1008.95	962.543	1063.92	1794.95	0.754118	1.90314e-12	Ttc38	tetratricopeptide repeat domain 38 [Source:MGI Symbol;Acc:MGI:2146198]
ENSMUSG00000029723	3144.32	2851.98	2769.83	2597.62	4320.64	4891.21	4423.2	4331.44	4491.62	2840.94	-0.661359	1.90726e-12	Tsc22d4	TSC22 domain family, member 4 [Source:MGI Symbol;Acc:MGI:1926079]
ENSMUSG00000038695	1193.51	1372.76	1413.22	1315.05	2136.48	2049.04	2085.21	1926.27	2049.25	1323.64	-0.631386	2.02472e-12	Josd2	Josephin domain containing 2 [Source:MGI Symbol;Acc:MGI:1913374]
ENSMUSG00000039886	786.08	948.325	870.159	957.873	472.175	445.075	545.649	523.946	496.711	890.609	0.842594	2.04496e-12	Tmem120a	transmembrane protein 120A [Source:MGI Symbol;Acc:MGI:2686991]
ENSMUSG00000029163	425.148	477.665	500.079	503.289	931.261	783.117	1121.37	921.054	939.201	476.545	-0.978825	2.04715e-12	Emilin1	elastin microfibril interfacer 1 [Source:MGI Symbol;Acc:MGI:1926189]
ENSMUSG00000060639	248.003	409.027	549.353	195.777	79.475	60.8321	64.4467	91.2757	74.0074	350.54	2.249	2.22174e-12	Hist1h4i	histone cluster 1, H4i [Source:MGI Symbol;Acc:MGI:2448432]
ENSMUSG00000022816	1528.98	1735.56	1992.98	1387.63	3049.04	3171.74	3074.83	3754.16	3262.44	1661.29	-0.973622	2.24265e-12	Fstl1	follistatin-like 1 [Source:MGI Symbol;Acc:MGI:102793]
ENSMUSG00000035697	163.859	113.463	138.387	127.971	396.44	372.693	612.96	312.945	423.76	135.92	-1.64124	2.29762e-12	Arhgap45	Rho GTPase activating protein 45 [Source:MGI Symbol;Acc:MGI:1917969]
ENSMUSG00000001493	183.788	119.066	141.532	122.241	432.905	331.882	310.777	355.619	357.796	141.657	-1.33354	2.30314e-12	Meox1	mesenchyme homeobox 1 [Source:MGI Symbol;Acc:MGI:103220]
ENSMUSG00000000296	436.219	588.326	419.354	494.694	209.44	244.098	194.056	246.563	223.539	484.648	1.11681	2.31528e-12	Tpd52l1	tumor protein D52-like 1 [Source:MGI Symbol;Acc:MGI:1298386]
ENSMUSG00000001435	215.895	161.089	246.37	250.212	511.445	702.264	562.119	454.008	557.459	218.392	-1.34869	2.36651e-12	Col18a1	collagen, type XVIII, alpha 1 [Source:MGI Symbol;Acc:MGI:88451]
ENSMUSG00000034430	1135.94	1192.06	1153.22	1168.93	688.16	669.923	721.088	523.946	650.779	1162.54	0.833373	2.42446e-12	Zxdc	ZXD family zinc finger C [Source:MGI Symbol;Acc:MGI:1933108]
ENSMUSG00000042622	1183.55	1780.39	1556.85	1343.7	737.715	426.595	545.649	413.704	530.916	1466.12	1.46445	2.50957e-12	Maff	v-maf musculoaponeurotic fibrosarcoma oncogene family, protein F (avian) [Source:MGI Symbol;Acc:MGI:96910]
ENSMUSG00000024610	1122.66	990.349	860.723	402.059	3172.46	2829.85	3265.3	2594.84	2965.61	843.947	-1.81418	2.56021e-12	Cd74	CD74 antigen (invariant polypeptide of major histocompatibility complex, class II antigen-associated) [Source:MGI Symbol;Acc:MGI:96534]
ENSMUSG00000040123	2101.38	2143.19	2082.09	2257.64	1533.4	1520.03	1554.6	1494.79	1525.7	2146.07	0.49202	2.73379e-12	Zmym5	zinc finger, MYM-type 5 [Source:MGI Symbol;Acc:MGI:3041170]
ENSMUSG00000035172	366.469	224.124	280.967	239.707	566.61	749.236	633.726	721.907	667.87	277.817	-1.26366	2.7695e-12	Plekhh3	pleckstrin homology domain containing, family H (with MyTH4 domain) member 3 [Source:MGI Symbol;Acc:MGI:2384950]
ENSMUSG00000086741	560.221	249.338	316.612	354.308	114.07	120.894	98.1023	78.2363	102.826	370.12	1.84484	2.78832e-12	Gm15816	predicted gene 15816 [Source:MGI Symbol;Acc:MGI:3802114]
ENSMUSG00000047496	73.0723	60.2334	56.6127	56.3455	143.99	146.305	158.969	157.658	151.73	61.566	-1.30309	2.84837e-12	Rnf152	ring finger protein 152 [Source:MGI Symbol;Acc:MGI:2443787]
ENSMUSG00000028683	614.471	666.769	614.353	637.946	385.22	366.533	420.336	378.142	387.558	633.385	0.70596	2.85658e-12	Eif2b3	eukaryotic translation initiation factor 2B, subunit 3 [Source:MGI Symbol;Acc:MGI:1313286]
ENSMUSG00000052253	1396.12	1616.5	1501.29	1588.18	1021.96	983.324	913.712	1006.4	981.349	1525.52	0.637167	2.97537e-12	Zfp622	zinc finger protein 622 [Source:MGI Symbol;Acc:MGI:1289282]
ENSMUSG00000029474	1355.16	1440	1478.22	1579.58	976.141	984.094	960.973	908.015	957.306	1463.24	0.611767	3.13936e-12	Rnf34	ring finger protein 34 [Source:MGI Symbol;Acc:MGI:2153340]
ENSMUSG00000025034	1763.7	1938.67	1588.3	1691.32	1139.77	1098.06	1135.69	1095.31	1117.21	1745.5	0.642257	3.16589e-12	Trim8	tripartite motif-containing 8 [Source:MGI Symbol;Acc:MGI:1933302]
ENSMUSG00000035860	1265.48	592.528	561.934	597.835	86.02	73.1525	58.7181	20.1518	59.5106	754.444	3.65922	3.17668e-12	Cdhr3	cadherin-related family member 3 [Source:MGI Symbol;Acc:MGI:1916014]
ENSMUSG00000071192	48.7148	56.031	47.1773	46.7954	4.675	9.24032	8.5929	2.3708	6.21975	49.6796	2.91561	3.17668e-12	Wfikkn1	WAP, FS, Ig, KU, and NTR-containing protein 1 [Source:MGI Symbol;Acc:MGI:2670967]
ENSMUSG00000040552	54.2506	67.2372	75.4836	77.3557	232.815	232.548	427.497	189.664	270.631	68.5818	-1.98206	3.20619e-12	C3ar1	complement component 3a receptor 1 [Source:MGI Symbol;Acc:MGI:1097680]
ENSMUSG00000003235	2549.78	2938.83	2733.14	2924.24	1816.71	1846.52	1940.56	1734.24	1834.51	2786.49	0.602013	3.26915e-12	Eif2b5	eukaryotic translation initiation factor 2B, subunit 5 epsilon [Source:MGI Symbol;Acc:MGI:2446176]
ENSMUSG00000032565	462.791	399.221	480.16	515.705	260.865	221.768	222.699	263.158	242.123	464.469	0.947786	3.29639e-12	Nudt16	nudix (nucleoside diphosphate linked moiety X)-type motif 16 [Source:MGI Symbol;Acc:MGI:1922936]
ENSMUSG00000031375	3674.65	2755.33	3280.39	2636.78	6703.02	7193.59	5240.95	6071.61	6302.29	3086.79	-1.02968	3.33145e-12	Bgn	biglycan [Source:MGI Symbol;Acc:MGI:88158]
ENSMUSG00000018900	501.541	588.326	564.031	603.565	1010.74	1411.46	988.9	1154.58	1141.42	564.366	-1.0163	3.43672e-12	Slc22a5	solute carrier family 22 (organic cation transporter), member 5 [Source:MGI Symbol;Acc:MGI:1329012]
ENSMUSG00000032725	24.3574	32.2178	37.7418	38.2003	102.85	119.354	105.263	162.4	122.467	33.1294	-1.87316	3.4449e-12	Folr2	folate receptor 2 (fetal) [Source:MGI Symbol;Acc:MGI:95569]
ENSMUSG00000038530	168.288	233.93	192.903	165.216	675.07	509.758	528.463	365.103	519.599	190.084	-1.45641	3.63276e-12	Rgs4	regulator of G-protein signaling 4 [Source:MGI Symbol;Acc:MGI:108409]
ENSMUSG00000024486	993.119	1424.59	1411.12	1196.63	538.56	504.368	702.47	509.721	563.78	1256.36	1.15391	3.75924e-12	Hbegf	heparin-binding EGF-like growth factor [Source:MGI Symbol;Acc:MGI:96070]
ENSMUSG00000030683	28.786	11.2062	26.2096	11.4601	157.08	142.455	114.572	73.4947	121.9	19.4155	-2.64525	3.83839e-12	Sez6l2	seizure related 6 homolog like 2 [Source:MGI Symbol;Acc:MGI:2385295]
ENSMUSG00000024087	987.583	1087	849.191	1130.73	559.13	395.794	431.793	534.615	480.333	1013.63	1.08008	4.0197e-12	Cyp1b1	cytochrome P450, family 1, subfamily b, polypeptide 1 [Source:MGI Symbol;Acc:MGI:88590]
ENSMUSG00000025178	2209.88	1865.83	1719.35	2165	1169.69	1111.15	1225.2	1063.3	1142.34	1990.02	0.800386	4.27334e-12	Pi4k2a	phosphatidylinositol 4-kinase type 2 alpha [Source:MGI Symbol;Acc:MGI:1934031]
ENSMUSG00000019278	4274.73	4066.45	3745.88	3821.94	2579.67	2612.7	2090.22	2270.04	2388.16	3977.25	0.735715	4.27334e-12	Dpep1	dipeptidase 1 (renal) [Source:MGI Symbol;Acc:MGI:94917]
ENSMUSG00000027314	338.79	264.747	242.177	201.507	795.685	774.647	683.852	507.35	690.384	261.805	-1.40192	4.28955e-12	Dll4	delta like canonical Notch ligand 4 [Source:MGI Symbol;Acc:MGI:1859388]
ENSMUSG00000064921	36.5361	44.8248	48.2257	42.0204	0.935001	0.770027	1.43215	1.1854	1.08064	42.9017	5.30554	4.4635e-12	Gm22229	predicted gene, 22229 [Source:MGI Symbol;Acc:MGI:5452006]
ENSMUSG00000109871	79.7152	77.0427	90.161	81.1757	26.18	11.5504	19.334	23.708	20.1931	82.0237	2.0485	4.49603e-12	Gm45276	predicted gene 45276 [Source:MGI Symbol;Acc:MGI:5791112]
ENSMUSG00000025372	1346.3	1157.04	1045.24	1082.98	526.405	466.636	603.651	336.653	483.336	1157.89	1.25695	4.87934e-12	Baiap2	brain-specific angiogenesis inhibitor 1-associated protein 2 [Source:MGI Symbol;Acc:MGI:2137336]
ENSMUSG00000096210	5467.13	4927.93	5756.68	5290.75	3394.99	3507.47	3543.14	3837.13	3570.68	5360.62	0.586874	5.06386e-12	H1f0	H1 histone family, member 0 [Source:MGI Symbol;Acc:MGI:95893]
ENSMUSG00000041264	1071.73	1098.21	1118.63	1008.49	690.965	729.985	736.841	694.643	713.109	1074.26	0.588966	5.08942e-12	Uspl1	ubiquitin specific peptidase like 1 [Source:MGI Symbol;Acc:MGI:2442342]
ENSMUSG00000056529	37.6433	37.821	40.887	45.8404	113.135	123.974	216.971	158.843	153.231	40.5479	-1.91561	5.12151e-12	Ptafr	platelet-activating factor receptor [Source:MGI Symbol;Acc:MGI:106066]
ENSMUSG00000020577	900.118	774.629	788.385	684.741	1611.94	1554.68	1377.73	1267.19	1452.89	786.968	-0.885635	5.23881e-12	Tspan13	tetraspanin 13 [Source:MGI Symbol;Acc:MGI:1913359]
ENSMUSG00000001741	90.7868	88.2489	82.8223	89.7708	216.92	185.576	189.76	177.81	192.517	87.9072	-1.13192	5.44228e-12	Il16	interleukin 16 [Source:MGI Symbol;Acc:MGI:1270855]
ENSMUSG00000024300	38.7504	37.821	41.9354	31.5153	142.12	137.835	316.505	142.248	184.677	37.5055	-2.30584	5.44495e-12	Myo1f	myosin IF [Source:MGI Symbol;Acc:MGI:107711]
ENSMUSG00000019916	713.008	917.508	918.384	650.361	2357.14	1746.42	1668.45	1584.88	1839.22	799.815	-1.20249	5.68158e-12	P4ha1	procollagen-proline, 2-oxoglutarate 4-dioxygenase (proline 4-hydroxylase), alpha 1 polypeptide [Source:MGI Symbol;Acc:MGI:97463]
ENSMUSG00000024013	55.3578	33.6186	25.1612	23.8752	123.42	133.215	161.833	126.838	136.326	34.5032	-1.99234	5.84978e-12	Fgd2	FYVE, RhoGEF and PH domain containing 2 [Source:MGI Symbol;Acc:MGI:1347084]
ENSMUSG00000004500	57.5721	35.0194	50.3224	69.7156	143.99	173.256	148.228	164.77	157.561	53.1574	-1.5486	6.06e-12	Zfp324	zinc finger protein 324 [Source:MGI Symbol;Acc:MGI:2444641]
ENSMUSG00000068735	328.825	228.326	237.983	150.891	1475.43	723.825	852.845	683.975	934.019	236.507	-1.9826	6.12129e-12	Trp53i11	transformation related protein 53 inducible protein 11 [Source:MGI Symbol;Acc:MGI:2670995]
ENSMUSG00000036908	385.29	324.98	348.063	263.582	703.12	639.122	791.979	612.851	686.768	330.479	-1.05788	6.20899e-12	Unc93b1	unc-93 homolog B1, TLR signaling regulator [Source:MGI Symbol;Acc:MGI:1859307]
ENSMUSG00000037447	970.975	1065.99	1042.09	1051.46	558.195	379.623	478.338	297.535	428.423	1032.63	1.26677	6.38959e-12	Arid5a	AT rich interactive domain 5A (MRF1-like) [Source:MGI Symbol;Acc:MGI:2443039]
ENSMUSG00000046447	1888.81	1947.08	1875.56	1962.54	1294.98	1329.07	1113.5	1281.42	1254.74	1918.5	0.6134	6.49656e-12	Camk2n1	calcium/calmodulin-dependent protein kinase II inhibitor 1 [Source:MGI Symbol;Acc:MGI:1913509]
ENSMUSG00000022215	1235.59	1364.36	1392.25	1462.12	2000.9	2102.17	2006.44	2165.72	2068.81	1363.58	-0.600473	6.55276e-12	Fitm1	fat storage-inducing transmembrane protein 1 [Source:MGI Symbol;Acc:MGI:1915930]
ENSMUSG00000031633	256152	334945	314853	339751	177227	166995	162579	196788	175897	311425	0.824162	6.7868e-12	Slc25a4	solute carrier family 25 (mitochondrial carrier, adenine nucleotide translocator), member 4 [Source:MGI Symbol;Acc:MGI:1353495]
ENSMUSG00000043895	98.5368	82.6458	80.7256	74.4907	192.61	174.026	194.056	189.664	187.589	84.0997	-1.15927	7.07144e-12	S1pr2	sphingosine-1-phosphate receptor 2 [Source:MGI Symbol;Acc:MGI:99569]
ENSMUSG00000024736	150.573	140.078	130	106.961	291.72	261.039	281.417	263.158	274.334	131.903	-1.06284	7.16023e-12	Tmem132a	transmembrane protein 132A [Source:MGI Symbol;Acc:MGI:2147810]
ENSMUSG00000037366	246.896	271.751	297.741	242.572	468.435	484.347	456.856	448.081	464.43	264.74	-0.813135	7.36139e-12	Pafah2	platelet-activating factor acetylhydrolase 2 [Source:MGI Symbol;Acc:MGI:2140321]
ENSMUSG00000034118	285.646	302.568	298.789	267.402	474.045	495.127	463.301	523.946	489.105	288.601	-0.761481	7.38995e-12	Tpst1	protein-tyrosine sulfotransferase 1 [Source:MGI Symbol;Acc:MGI:1298231]
ENSMUSG00000037145	1.10716	4.20233	8.38707	1.91002	103.785	154.775	393.125	104.315	189	3.90164	-5.60411	7.49503e-12	2210407C18Rik	RIKEN cDNA 2210407C18 gene [Source:MGI Symbol;Acc:MGI:1925604]
ENSMUSG00000032418	2787.82	2943.03	2973.22	2889.86	3795.17	4018	4083.06	4112.15	4002.09	2898.48	-0.465525	7.86656e-12	Me1	malic enzyme 1, NADP(+)-dependent, cytosolic [Source:MGI Symbol;Acc:MGI:97043]
ENSMUSG00000028909	602.293	452.451	490.644	535.76	223.465	282.6	245.614	289.237	260.229	520.287	1.00288	7.94353e-12	Ptpru	protein tyrosine phosphatase, receptor type, U [Source:MGI Symbol;Acc:MGI:1321151]
ENSMUSG00000038886	2201.03	2448.56	2335.8	2207.02	3394.05	3619.9	3353.38	3179.24	3386.64	2298.1	-0.560543	7.99621e-12	Man2a2	mannosidase 2, alpha 2 [Source:MGI Symbol;Acc:MGI:2150656]
ENSMUSG00000020681	1214.55	972.139	1150.08	891.978	2348.72	2599.61	1980.66	1843.29	2193.07	1057.19	-1.05306	8.23329e-12	Ace	angiotensin I converting enzyme (peptidyl-dipeptidase A) 1 [Source:MGI Symbol;Acc:MGI:87874]
ENSMUSG00000037580	467.22	614.941	439.273	606.43	276.76	227.928	249.91	252.49	251.772	531.966	1.0793	8.24643e-12	Gch1	GTP cyclohydrolase 1 [Source:MGI Symbol;Acc:MGI:95675]
ENSMUSG00000034055	2869.75	3059.29	2937.57	3745.54	1798.94	1661.72	1976.37	1639.41	1769.11	3153.04	0.833478	8.42473e-12	Phka1	phosphorylase kinase alpha 1 [Source:MGI Symbol;Acc:MGI:97576]
ENSMUSG00000061100	17.7145	14.0078	23.0644	8.59508	100.045	143.995	66.595	247.748	139.596	15.8454	-3.13529	9.45118e-12	Retnla	resistin like alpha [Source:MGI Symbol;Acc:MGI:1888504]
ENSMUSG00000046982	763.937	565.914	696.127	591.15	1137.9	1333.69	1156.46	1179.47	1201.88	654.282	-0.876576	9.73604e-12	Tshz1	teashirt zinc finger family member 1 [Source:MGI Symbol;Acc:MGI:1346031]
ENSMUSG00000028675	1220.09	1124.82	1141.69	1344.65	1822.32	1821.11	2005.73	1928.64	1894.45	1207.81	-0.648136	9.80995e-12	Pnrc2	proline-rich nuclear receptor coactivator 2 [Source:MGI Symbol;Acc:MGI:106512]
ENSMUSG00000032578	3920.44	2784.74	2714.27	3868.74	1461.41	1710.23	1681.34	1356.1	1552.27	3322.05	1.0973	9.96933e-12	Cish	cytokine inducible SH2-containing protein [Source:MGI Symbol;Acc:MGI:103159]
ENSMUSG00000035105	889.046	1343.34	1201.45	1107.81	2588.08	2120.65	2058	2311.53	2269.57	1135.41	-0.999806	9.97932e-12	Egln3	egl-9 family hypoxia-inducible factor 3 [Source:MGI Symbol;Acc:MGI:1932288]
ENSMUSG00000079243	13505.1	13496.5	11359.2	11859.3	6902.17	6787.79	7548.86	5149.37	6597.05	12555	0.927984	9.98002e-12	Xirp1	xin actin-binding repeat containing 1 [Source:MGI Symbol;Acc:MGI:1333878]
ENSMUSG00000020107	2458.99	3028.48	2943.86	2830.64	1786.79	1466.9	1769.42	1666.67	1672.44	2815.49	0.751337	9.98659e-12	Anapc16	anaphase promoting complex subunit 16 [Source:MGI Symbol;Acc:MGI:1289325]
ENSMUSG00000085882	174.931	172.295	185.564	167.126	308.55	299.54	335.123	335.468	319.67	174.979	-0.868287	1.02352e-11	2610507I01Rik	RIKEN cDNA 2610507I01 gene [Source:MGI Symbol;Acc:MGI:1919453]
ENSMUSG00000057913	119.573	109.261	111.129	129.881	39.27	40.0414	41.5323	18.9664	34.9525	117.461	1.72353	1.03548e-11	Gm10032	predicted gene 10032 [Source:MGI Symbol;Acc:MGI:3642901]
ENSMUSG00000017999	1032.98	1084.2	980.239	994.164	698.445	655.293	696.741	631.817	670.574	1022.89	0.606431	1.06545e-11	Ddx27	DEAD (Asp-Glu-Ala-Asp) box polypeptide 27 [Source:MGI Symbol;Acc:MGI:2385884]
ENSMUSG00000037902	745.116	834.862	731.772	732.491	1411.85	1229.73	1590.4	1210.29	1360.57	761.06	-0.840455	1.15627e-11	Sirpa	signal-regulatory protein alpha [Source:MGI Symbol;Acc:MGI:108563]
ENSMUSG00000060586	408.54	389.416	366.934	139.431	1450.19	1066.49	1243.11	1137.98	1224.44	326.08	-1.91107	1.17152e-11	H2-Eb1	histocompatibility 2, class II antigen E beta [Source:MGI Symbol;Acc:MGI:95901]
ENSMUSG00000037110	5378.56	6311.9	5336.27	6141.66	3388.44	3820.1	3364.12	3837.13	3602.45	5792.1	0.685192	1.18631e-11	Ralgapa2	Ral GTPase activating protein, alpha subunit 2 (catalytic) [Source:MGI Symbol;Acc:MGI:3036245]
ENSMUSG00000020935	539.185	509.882	501.127	533.85	1133.22	1067.26	788.399	972.027	990.226	521.011	-0.925439	1.2086e-11	Dcakd	dephospho-CoA kinase domain containing [Source:MGI Symbol;Acc:MGI:1915337]
ENSMUSG00000100457	685.329	823.656	707.659	912.033	427.295	333.422	431.077	389.996	395.447	782.169	0.984261	1.26713e-11	D830032E09Rik	RIKEN cDNA D830032E09 gene [Source:MGI Symbol;Acc:MGI:2442347]
ENSMUSG00000044177	584.578	535.096	517.902	497.559	330.99	328.801	310.06	293.979	315.958	533.784	0.753667	1.31623e-11	Wfikkn2	WAP, follistatin/kazal, immunoglobulin, kunitz and netrin domain containing 2 [Source:MGI Symbol;Acc:MGI:2669209]
ENSMUSG00000041920	567.971	724.201	745.401	832.767	335.665	295.69	383.1	372.215	346.668	717.585	1.05117	1.32289e-11	Slc16a6	solute carrier family 16 (monocarboxylic acid transporters), member 6 [Source:MGI Symbol;Acc:MGI:2144585]
ENSMUSG00000053436	1862.24	1766.38	1869.27	1778.23	2512.35	2738.22	2670.24	2470.37	2597.79	1819.03	-0.514666	1.3495e-11	Mapk14	mitogen-activated protein kinase 14 [Source:MGI Symbol;Acc:MGI:1346865]
ENSMUSG00000106271	37.6433	43.4241	27.258	52.5255	1.87	1.54005	1.43215	4.74159	2.39595	40.2127	4.18432	1.41207e-11	Gm43752	predicted gene 43752 [Source:MGI Symbol;Acc:MGI:5663889]
ENSMUSG00000022912	558.006	605.135	552.498	514.75	870.486	835.479	950.948	958.987	903.975	557.597	-0.698827	1.41314e-11	Pros1	protein S (alpha) [Source:MGI Symbol;Acc:MGI:1095733]
ENSMUSG00000025934	672.043	867.08	730.724	1029.5	272.085	429.675	261.367	309.389	318.129	824.837	1.37389	1.4531e-11	Gsta3	glutathione S-transferase, alpha 3 [Source:MGI Symbol;Acc:MGI:95856]
ENSMUSG00000033454	307.789	296.965	342.822	304.648	510.51	515.918	542.069	499.053	516.887	313.056	-0.723255	1.47447e-11	Zbtb1	zinc finger and BTB domain containing 1 [Source:MGI Symbol;Acc:MGI:2442326]
ENSMUSG00000033287	341.004	243.735	237.983	239.707	567.545	529.778	559.971	499.053	539.087	265.607	-1.02201	1.47447e-11	Kctd17	potassium channel tetramerisation domain containing 17 [Source:MGI Symbol;Acc:MGI:1920094]
ENSMUSG00000020400	2104.7	1934.47	1997.17	1578.63	1186.52	1104.99	1066.95	1087.01	1111.37	1903.74	0.776148	1.47629e-11	Tnip1	TNFAIP3 interacting protein 1 [Source:MGI Symbol;Acc:MGI:1926194]
ENSMUSG00000045639	655.436	599.532	607.014	704.796	1124.81	1260.53	986.751	1075.16	1111.81	641.695	-0.791664	1.47629e-11	Zfp629	zinc finger protein 629 [Source:MGI Symbol;Acc:MGI:2444524]
ENSMUSG00000035235	100.751	114.864	122.661	86.9058	238.425	238.708	214.106	225.226	229.116	106.295	-1.11319	1.47629e-11	Trim13	tripartite motif-containing 13 [Source:MGI Symbol;Acc:MGI:1913847]
ENSMUSG00000022324	364.254	327.782	369.031	257.852	776.05	755.396	569.996	726.649	707.023	329.73	-1.10073	1.51323e-11	Matn2	matrilin 2 [Source:MGI Symbol;Acc:MGI:109613]
ENSMUSG00000031781	2592.96	3006.07	2987.89	4056.88	1691.42	1461.51	1647.69	1462.78	1565.85	3160.95	1.01354	1.56093e-11	Ciapin1	cytokine induced apoptosis inhibitor 1 [Source:MGI Symbol;Acc:MGI:1922083]
ENSMUSG00000042613	8030.2	7333.06	7797.88	6946.73	5368.77	4917.39	5273.89	4925.33	5121.35	7526.97	0.55541	1.61395e-11	Pbxip1	pre B cell leukemia transcription factor interacting protein 1 [Source:MGI Symbol;Acc:MGI:2441670]
ENSMUSG00000022124	4228.23	4486.69	4752.32	5085.42	2870.45	2650.43	2728.25	3220.73	2867.46	4638.16	0.694763	1.6919e-11	Fbxl3	F-box and leucine-rich repeat protein 3 [Source:MGI Symbol;Acc:MGI:1354702]
ENSMUSG00000086245	32.1075	23.8132	23.0644	21.0102	130.9	244.098	78.0522	131.579	146.157	24.9988	-2.5502	1.69508e-11	Gm16170	predicted gene 16170 [Source:MGI Symbol;Acc:MGI:3805548]
ENSMUSG00000032705	471.648	493.073	439.273	457.449	924.716	759.246	781.954	731.391	799.327	465.361	-0.782227	1.71597e-11	Exd2	exonuclease 3'-5' domain containing 2 [Source:MGI Symbol;Acc:MGI:1922485]
ENSMUSG00000028214	318.861	787.236	439.273	447.899	167.365	100.874	100.25	146.989	128.87	498.317	1.95374	1.72921e-11	Gem	GTP binding protein (gene overexpressed in skeletal muscle) [Source:MGI Symbol;Acc:MGI:99844]
ENSMUSG00000074178	242.467	331.984	253.709	278.862	128.095	66.2223	105.263	75.8655	93.8615	276.756	1.55627	1.76295e-11	Gm10638	predicted gene 10638 [Source:MGI Symbol;Acc:MGI:3704316]
ENSMUSG00000021998	160.538	183.502	202.338	195.777	453.475	540.559	1249.55	653.154	724.185	185.539	-1.96522	1.82591e-11	Lcp1	lymphocyte cytosolic protein 1 [Source:MGI Symbol;Acc:MGI:104808]
ENSMUSG00000109279	59.7864	137.276	88.0642	150.891	11.22	13.8605	10.7411	28.4496	16.0678	109.005	2.799	1.83919e-11	Gm45220	predicted gene 45220 [Source:MGI Symbol;Acc:MGI:5753796]
ENSMUSG00000039611	1113.8	1018.36	1086.13	1178.48	1632.51	1714.85	1582.53	1602.66	1633.14	1099.19	-0.569779	1.83919e-11	Tmem246	transmembrane protein 246 [Source:MGI Symbol;Acc:MGI:1914313]
ENSMUSG00000045377	251.324	193.307	209.677	190.047	473.11	485.887	542.069	361.546	465.653	211.089	-1.14428	1.85147e-11	Tmem88	transmembrane protein 88 [Source:MGI Symbol;Acc:MGI:1914270]
ENSMUSG00000032998	1854.49	2182.41	2224.67	1891.87	1294.04	1267.46	1285.35	1109.53	1239.1	2038.36	0.716487	1.99125e-11	Foxj3	forkhead box J3 [Source:MGI Symbol;Acc:MGI:2443432]
ENSMUSG00000028773	40572.8	58266.7	57593	51336.5	98054.4	90670.6	91676.2	106132	96633.4	51942.2	-0.895617	2.12655e-11	Fabp3	fatty acid binding protein 3, muscle and heart [Source:MGI Symbol;Acc:MGI:95476]
ENSMUSG00000020423	2193.28	3387.08	2791.85	2722.73	1450.19	1052.63	1310.42	898.532	1177.94	2773.73	1.23454	2.21615e-11	Btg2	B cell translocation gene 2, anti-proliferative [Source:MGI Symbol;Acc:MGI:108384]
ENSMUSG00000086841	549.149	885.29	658.385	641.766	284.24	171.716	303.616	254.861	253.608	683.648	1.42967	2.21646e-11	2410006H16Rik	RIKEN cDNA 2410006H16 gene [Source:MGI Symbol;Acc:MGI:1916471]
ENSMUSG00000038214	151.68	175.097	191.854	150.891	337.535	348.052	378.804	291.608	339	167.381	-1.02399	2.32803e-11	Bend3	BEN domain containing 3 [Source:MGI Symbol;Acc:MGI:2677212]
ENSMUSG00000043099	260.182	267.548	310.322	243.527	437.58	525.928	549.946	514.463	506.979	270.395	-0.908266	2.33626e-11	Hic1	hypermethylated in cancer 1 [Source:MGI Symbol;Acc:MGI:1338010]
ENSMUSG00000003617	5822.53	7926.99	7944.65	6200.87	3468.85	3699.21	3874.68	4056.43	3774.79	6973.76	0.885471	2.52888e-11	Cp	ceruloplasmin [Source:MGI Symbol;Acc:MGI:88476]
ENSMUSG00000101941	3.32147	2.80155	2.09677	0	54.23	106.264	27.2108	65.1969	63.2254	2.05495	-5.00786	2.73547e-11	Gm28979	predicted gene 28979 [Source:MGI Symbol;Acc:MGI:5579685]
ENSMUSG00000115186	179.359	158.288	160.403	149.936	83.215	63.9122	65.8789	55.7137	67.18	161.996	1.26546	2.74474e-11	Gm49417	predicted gene, 49417 [Source:MGI Symbol;Acc:MGI:6155048]
ENSMUSG00000050914	24.3574	28.0155	9.43545	20.0552	119.68	103.184	128.177	66.3823	104.356	20.4659	-2.37458	2.7813e-11	Ankrd37	ankyrin repeat domain 37 [Source:MGI Symbol;Acc:MGI:3603344]
ENSMUSG00000026674	682.008	647.159	708.708	602.61	959.311	1158.89	1140.71	1200.81	1114.93	660.121	-0.756105	2.96185e-11	Ddr2	discoidin domain receptor family, member 2 [Source:MGI Symbol;Acc:MGI:1345277]
ENSMUSG00000041417	13554.9	15234.8	14049.4	15937.2	6990.06	8499.55	8542.06	5621.16	7413.21	14694.1	0.986751	3.02216e-11	Pik3r1	phosphoinositide-3-kinase regulatory subunit 1 [Source:MGI Symbol;Acc:MGI:97583]
ENSMUSG00000104669	55.3578	29.4163	33.5483	43.9304	2.805	1.54005	0	1.1854	1.38261	40.5632	4.95089	3.23518e-11	Gm38411	predicted gene, 38411 [Source:MGI Symbol;Acc:MGI:5621296]
ENSMUSG00000004952	163.859	100.856	139.435	122.241	361.845	344.972	414.607	254.861	344.071	131.598	-1.38598	3.25476e-11	Rasa4	RAS p21 protein activator 4 [Source:MGI Symbol;Acc:MGI:1858600]
ENSMUSG00000075273	301.146	232.529	329.193	403.014	713.405	800.828	613.676	845.189	743.275	316.47	-1.22613	3.28013e-11	Ttc30b	tetratricopeptide repeat domain 30B [Source:MGI Symbol;Acc:MGI:1919671]
ENSMUSG00000082488	33.2147	4.20233	14.6774	14.3251	108.46	193.277	106.695	101.944	127.594	16.6049	-2.92471	3.37611e-11	1700119I11Rik	RIKEN cDNA 1700119I11 gene [Source:MGI Symbol;Acc:MGI:1925729]
ENSMUSG00000022286	22.1431	14.0078	7.33869	13.3701	65.45	83.9329	71.6075	133.95	88.7351	14.2149	-2.64017	3.41125e-11	Grhl2	grainyhead like transcription factor 2 [Source:MGI Symbol;Acc:MGI:2182543]
ENSMUSG00000037465	372.004	420.233	452.902	361.948	677.875	911.712	703.902	838.077	782.891	401.772	-0.963122	3.5214e-11	Klf10	Kruppel-like factor 10 [Source:MGI Symbol;Acc:MGI:1101353]
ENSMUSG00000020038	577.935	707.392	609.111	785.017	316.965	383.473	343	280.939	331.094	669.864	1.01293	3.5752e-11	Cry1	cryptochrome 1 (photolyase-like) [Source:MGI Symbol;Acc:MGI:1270841]
ENSMUSG00000042524	7027.12	6380.53	6659.33	7061.33	4810.58	4332.17	4310.06	3764.82	4304.41	6782.08	0.655728	3.6731e-11	Sun2	Sad1 and UNC84 domain containing 2 [Source:MGI Symbol;Acc:MGI:2443011]
ENSMUSG00000043488	49.822	50.4279	35.6451	40.1104	6.545	7.70027	5.7286	2.3708	5.58617	44.0013	2.92227	3.68767e-11	Frmd8os	FERM domain containing 8, opposite strand [Source:MGI Symbol;Acc:MGI:3704490]
ENSMUSG00000042500	350.968	437.042	446.612	424.979	742.39	688.404	691.728	678.048	700.143	414.9	-0.755474	3.83285e-11	Ago4	argonaute RISC catalytic subunit 4 [Source:MGI Symbol;Acc:MGI:1924100]
ENSMUSG00000002741	3465.4	3679.84	3747.97	3780.88	2455.31	2475.64	2514.86	2773.83	2554.91	3668.52	0.522825	3.85421e-11	Ykt6	YKT6 v-SNARE homolog (S. cerevisiae) [Source:MGI Symbol;Acc:MGI:1927550]
ENSMUSG00000038058	689.758	655.563	676.208	738.221	1047.2	1143.49	1232.37	1021.81	1111.22	689.938	-0.68811	4.1251e-11	Nod1	nucleotide-binding oligomerization domain containing 1 [Source:MGI Symbol;Acc:MGI:1341839]
ENSMUSG00000042116	205.931	240.933	231.693	181.452	543.235	378.853	440.386	449.266	452.935	215.002	-1.07753	4.28966e-11	Vwa1	von Willebrand factor A domain containing 1 [Source:MGI Symbol;Acc:MGI:2179729]
ENSMUSG00000038068	3986.87	4941.94	4632.81	3392.19	2068.22	1783.38	1645.54	1039.59	1634.18	4238.45	1.37414	4.29572e-11	Rnf144b	ring finger protein 144B [Source:MGI Symbol;Acc:MGI:2384986]
ENSMUSG00000033295	1138.16	910.504	877.497	902.483	370.26	324.181	547.797	427.929	417.542	957.16	1.19604	4.29572e-11	Ptprf	protein tyrosine phosphatase, receptor type, F [Source:MGI Symbol;Acc:MGI:102695]
ENSMUSG00000044783	892.367	705.991	717.095	776.422	1525.92	1385.28	1359.11	1188.95	1364.82	772.969	-0.820182	4.29572e-11	Hjurp	Holliday junction recognition protein [Source:MGI Symbol;Acc:MGI:2685821]
ENSMUSG00000021752	649.9	729.804	632.175	776.422	361.845	371.923	389.545	263.158	346.618	697.075	1.00282	4.62055e-11	Kctd6	potassium channel tetramerisation domain containing 6 [Source:MGI Symbol;Acc:MGI:1918643]
ENSMUSG00000052374	90755.8	93085.8	89563.4	89774.6	64796.5	60477.9	56643	49923	57960.1	90794.9	0.647518	4.68302e-11	Actn2	actinin alpha 2 [Source:MGI Symbol;Acc:MGI:109192]
ENSMUSG00000110627	24.3574	60.2334	59.7579	70.6706	2.805	5.39019	7.16075	4.74159	5.02438	53.7548	3.39103	4.83145e-11	Gm18935	predicted gene, 18935 [Source:MGI Symbol;Acc:MGI:5011120]
ENSMUSG00000026204	374.219	474.863	459.192	455.539	258.06	252.569	233.44	243.007	246.769	440.953	0.83709	4.89481e-11	Ptprn	protein tyrosine phosphatase, receptor type, N [Source:MGI Symbol;Acc:MGI:102765]
ENSMUSG00000028669	839.224	918.909	903.707	924.448	614.295	614.481	560.687	571.362	590.206	896.572	0.602844	4.89481e-11	Pithd1	PITH (C-terminal proteasome-interacting domain of thioredoxin-like) domain containing 1 [Source:MGI Symbol;Acc:MGI:1913443]
ENSMUSG00000020601	831.474	591.127	570.321	577.78	1210.83	1369.88	1320.44	1169.99	1267.78	642.676	-0.980779	5.27952e-11	Trib2	tribbles pseudokinase 2 [Source:MGI Symbol;Acc:MGI:2145021]
ENSMUSG00000054013	521.47	477.665	469.676	448.854	274.89	276.44	302.184	239.45	273.241	479.416	0.804953	5.37137e-11	Tmem179	transmembrane protein 179 [Source:MGI Symbol;Acc:MGI:2144891]
ENSMUSG00000040562	4596.91	4241.55	3912.57	3994.8	2868.58	2840.63	2808.45	2520.16	2759.45	4186.46	0.600601	5.49556e-11	Gstm2	glutathione S-transferase, mu 2 [Source:MGI Symbol;Acc:MGI:95861]
ENSMUSG00000033596	643.257	526.692	612.256	651.316	998.581	973.314	957.392	938.835	967.03	608.38	-0.665635	5.49556e-11	Rfwd3	ring finger and WD repeat domain 3 [Source:MGI Symbol;Acc:MGI:2384584]
ENSMUSG00000036995	273.467	166.692	226.451	198.642	455.345	541.329	433.225	462.305	473.051	216.313	-1.12578	5.6306e-11	Asap3	ArfGAP with SH3 domain, ankyrin repeat and PH domain 3 [Source:MGI Symbol;Acc:MGI:2684986]
ENSMUSG00000037206	499.327	407.626	471.773	265.492	1209.89	1221.26	801.288	1225.7	1114.54	411.055	-1.43938	5.6306e-11	Islr	immunoglobulin superfamily containing leucine-rich repeat [Source:MGI Symbol;Acc:MGI:1349645]
ENSMUSG00000021798	48733.7	46124.8	47893.3	46311.2	33460.9	33234.4	29344.8	27203.7	30810.9	47265.7	0.617307	5.68712e-11	Ldb3	LIM domain binding 3 [Source:MGI Symbol;Acc:MGI:1344412]
ENSMUSG00000024621	982.047	777.431	756.933	718.166	1518.44	1661.72	1582.53	1290.9	1513.4	808.644	-0.905451	5.72228e-11	Csf1r	colony stimulating factor 1 receptor [Source:MGI Symbol;Acc:MGI:1339758]
ENSMUSG00000054889	67383.7	73951.2	67362.9	69127.3	46377.9	48624.1	48810.5	40541.8	46088.6	69456.3	0.591618	5.77524e-11	Dsp	desmoplakin [Source:MGI Symbol;Acc:MGI:109611]
ENSMUSG00000100546	47.6077	46.2256	31.4515	40.1104	4.675	6.93024	2.14822	1.1854	3.73472	41.3488	3.41533	5.84492e-11	Gm29483	predicted gene 29483 [Source:MGI Symbol;Acc:MGI:5580189]
ENSMUSG00000039033	386.397	495.875	457.095	457.449	218.79	234.088	251.342	271.456	243.919	449.204	0.882007	5.98282e-11	Tasp1	taspase, threonine aspartase 1 [Source:MGI Symbol;Acc:MGI:1923062]
ENSMUSG00000114800	12.1787	25.214	16.7741	30.5603	117.81	125.514	98.1023	67.5677	102.249	21.1818	-2.27489	6.13868e-11	Gm31600	predicted gene, 31600 [Source:MGI Symbol;Acc:MGI:5590759]
ENSMUSG00000021575	406.326	711.594	637.417	546.265	283.305	182.496	183.315	213.372	215.622	575.401	1.41726	6.37632e-11	Ahrr	aryl-hydrocarbon receptor repressor [Source:MGI Symbol;Acc:MGI:1333776]
ENSMUSG00000102252	1538.95	1720.15	1923.78	2367.47	913.496	756.936	877.908	1053.82	900.54	1887.59	1.06957	6.49697e-11	Snrpn	small nuclear ribonucleoprotein N [Source:MGI Symbol;Acc:MGI:98347]
ENSMUSG00000078963	164.966	172.295	202.338	203.417	68.255	78.5427	80.2004	98.388	81.3466	185.754	1.20236	6.54839e-11	Hsbp1l1	heat shock factor binding protein 1-like 1 [Source:MGI Symbol;Acc:MGI:1913505]
ENSMUSG00000027884	1640.8	1756.57	1703.62	1660.76	1232.33	1196.62	1238.81	1228.07	1223.96	1690.44	0.465287	6.55176e-11	Clcc1	chloride channel CLIC-like 1 [Source:MGI Symbol;Acc:MGI:2385186]
ENSMUSG00000021149	1697.27	1955.48	1816.85	1784.91	1172.49	1056.48	1258.86	1207.92	1173.94	1813.63	0.627172	6.64875e-11	Gtpbp4	GTP binding protein 4 [Source:MGI Symbol;Acc:MGI:1916487]
ENSMUSG00000028646	1957.45	1958.28	1886.04	1978.78	1407.18	1406.07	1470.82	1424.85	1427.23	1945.14	0.4463	7.02032e-11	Rragc	Ras-related GTP binding C [Source:MGI Symbol;Acc:MGI:1858751]
ENSMUSG00000029534	575.721	620.544	649.998	646.541	368.39	349.592	397.422	412.519	381.981	623.201	0.708989	7.35482e-11	St7	suppression of tumorigenicity 7 [Source:MGI Symbol;Acc:MGI:1927450]
ENSMUSG00000055553	2668.25	2989.26	2861.04	2853.56	2043.91	1969.73	2102.4	1929.83	2011.47	2843.03	0.498211	7.39431e-11	Kxd1	KxDL motif containing 1 [Source:MGI Symbol;Acc:MGI:1922870]
ENSMUSG00000005968	100.751	117.665	124.758	116.511	42.075	50.8218	44.3966	39.1181	44.1029	114.921	1.37185	7.41099e-11	Tuft1	tuftelin 1 [Source:MGI Symbol;Acc:MGI:109572]
ENSMUSG00000015357	6092.68	6765.75	6681.35	7059.42	4214.05	3698.44	4610.09	4394.27	4229.21	6649.8	0.65306	7.53423e-11	Clpx	caseinolytic mitochondrial matrix peptidase chaperone subunit [Source:MGI Symbol;Acc:MGI:1346017]
ENSMUSG00000046442	831.474	1131.83	1128.06	889.113	491.81	528.238	576.44	471.788	517.069	995.119	0.941501	7.84239e-11	Ppm1e	protein phosphatase 1E (PP2C domain containing) [Source:MGI Symbol;Acc:MGI:2444096]
ENSMUSG00000090582	124.001	333.385	256.854	271.222	45.815	52.3618	54.4217	84.1633	59.1905	246.366	2.06525	8.09018e-11	Gm17024	predicted gene 17024 [Source:MGI Symbol;Acc:MGI:4937851]
ENSMUSG00000031230	133.966	214.319	206.532	144.206	385.22	515.918	383.816	576.104	465.264	174.756	-1.41507	8.69962e-11	Fgf16	fibroblast growth factor 16 [Source:MGI Symbol;Acc:MGI:1931627]
ENSMUSG00000086584	131.752	165.292	139.435	118.421	440.385	400.414	287.862	277.383	351.511	138.725	-1.3476	8.74303e-11	Gm12002	predicted gene 12002 [Source:MGI Symbol;Acc:MGI:3651521]
ENSMUSG00000036896	849.188	893.695	959.271	902.483	1307.13	1302.12	1384.17	1501.9	1373.83	901.159	-0.606893	9.30302e-11	C1qc	complement component 1, q subcomponent, C chain [Source:MGI Symbol;Acc:MGI:88225]
ENSMUSG00000084839	87.4653	137.276	113.225	128.926	43.945	41.5814	32.2234	39.1181	39.217	116.723	1.57613	9.65714e-11	Gm14097	predicted gene 14097 [Source:MGI Symbol;Acc:MGI:3651729]
ENSMUSG00000026107	3857.33	5667.54	4602.41	3727.4	2035.5	2138.36	1829.57	2529.64	2133.27	4463.67	1.06537	9.82301e-11	Nabp1	nucleic acid binding protein 1 [Source:MGI Symbol;Acc:MGI:1923258]
ENSMUSG00000032238	2019.45	3583.18	3034.02	2732.28	1203.35	1175.06	973.146	1466.34	1204.47	2842.23	1.23928	9.84466e-11	Rora	RAR-related orphan receptor alpha [Source:MGI Symbol;Acc:MGI:104661]
ENSMUSG00000033327	2792.25	2081.55	2327.41	1876.59	4794.68	5606.56	4243.46	3981.75	4656.62	2269.45	-1.03713	1.00056e-10	Tnxb	tenascin XB [Source:MGI Symbol;Acc:MGI:1932137]
ENSMUSG00000037149	4150.73	4911.12	4449.34	4498.09	2888.22	3050.85	3247.4	3026.32	3053.2	4502.32	0.559689	1.00077e-10	Ddx1	DEAD (Asp-Glu-Ala-Asp) box polypeptide 1 [Source:MGI Symbol;Acc:MGI:2144727]
ENSMUSG00000021792	1371.77	1823.81	1735.08	1712.33	877.966	776.957	750.447	1044.34	862.426	1660.75	0.947359	1.00536e-10	Fam213a	family with sequence similarity 213, member A [Source:MGI Symbol;Acc:MGI:1917814]
ENSMUSG00000002546	6135.86	6402.95	5874.09	5877.12	4315.96	4458.45	4249.19	3837.13	4215.19	6072.5	0.525928	1.02411e-10	Golga2	golgi autoantigen, golgin subfamily a, 2 [Source:MGI Symbol;Acc:MGI:2139395]
ENSMUSG00000030655	5754.99	11604	12215.8	12112.4	3303.36	2927.64	3187.25	4669.28	3521.88	10421.8	1.56546	1.03271e-10	Smg1	SMG1 homolog, phosphatidylinositol 3-kinase-related kinase (C. elegans) [Source:MGI Symbol;Acc:MGI:1919742]
ENSMUSG00000072941	643.257	472.062	572.418	526.21	1029.44	905.551	943.071	948.319	956.594	553.487	-0.787215	1.04082e-10	Sod3	superoxide dismutase 3, extracellular [Source:MGI Symbol;Acc:MGI:103181]
ENSMUSG00000006221	113844	136185	131776	132683	82368.9	73095.6	87874.6	68958.2	78074.3	128622	0.720194	1.06191e-10	Hspb7	heat shock protein family, member 7 (cardiovascular) [Source:MGI Symbol;Acc:MGI:1352494]
ENSMUSG00000032435	4684.38	5586.29	4843.53	4603.14	2949.93	2379.38	3001.07	2098.15	2607.13	4929.34	0.918155	1.09116e-10	Dync1li1	dynein cytoplasmic 1 light intermediate chain 1 [Source:MGI Symbol;Acc:MGI:2135610]
ENSMUSG00000020826	129.537	82.6458	74.4353	84.9957	335.665	289.53	258.503	197.961	270.415	92.9035	-1.54305	1.1159e-10	Nos2	nitric oxide synthase 2, inducible [Source:MGI Symbol;Acc:MGI:97361]
ENSMUSG00000073147	1051.8	914.707	882.739	1002.76	598.4	580.6	564.983	655.525	599.877	963.001	0.686069	1.11611e-10	5031425E22Rik	RIKEN cDNA 5031425E22 gene [Source:MGI Symbol;Acc:MGI:1923227]
ENSMUSG00000039997	395.255	498.676	468.628	294.143	1074.32	892.461	812.029	919.869	924.669	414.175	-1.16124	1.14255e-10	Ifi203	interferon activated gene 203 [Source:MGI Symbol;Acc:MGI:96428]
ENSMUSG00000021039	1557.77	1406.38	1448.87	1697.05	1007.93	1016.44	994.628	1014.7	1008.42	1527.52	0.600467	1.17162e-10	Snw1	SNW domain containing 1 [Source:MGI Symbol;Acc:MGI:1913604]
ENSMUSG00000053214	1599.84	1437.2	1540.08	1493.63	1105.17	924.802	952.38	915.127	974.37	1517.69	0.639685	1.17625e-10	Gm9899	predicted gene 9899 [Source:MGI Symbol;Acc:MGI:3708711]
ENSMUSG00000098055	194.859	151.284	138.387	148.026	53.295	66.9923	71.6075	56.8991	62.1985	158.139	1.33606	1.17672e-10	Gm26947	predicted gene, 26947 [Source:MGI Symbol;Acc:MGI:5504062]
ENSMUSG00000041560	4490.62	4228.94	4189.34	4509.55	3183.68	3135.55	3248.83	3316.74	3221.2	4354.61	0.435488	1.23337e-10	Nop53	NOP53 ribosome biogenesis factor [Source:MGI Symbol;Acc:MGI:2154441]
ENSMUSG00000033249	294.503	261.945	255.806	273.132	150.535	145.535	156.82	130.394	145.821	271.347	0.890685	1.23784e-10	Hsf4	heat shock transcription factor 4 [Source:MGI Symbol;Acc:MGI:1347058]
ENSMUSG00000073380	50.9292	63.0349	79.6772	76.4007	16.83	13.8605	20.0501	13.0394	15.945	67.5105	2.06991	1.27182e-10	Arrdc5	arrestin domain containing 5 [Source:MGI Symbol;Acc:MGI:1924170]
ENSMUSG00000030126	2244.2	2151.59	2117.74	2486.84	1485.72	1446.88	1308.27	1151.02	1347.97	2250.09	0.738562	1.29311e-10	Tmcc1	transmembrane and coiled coil domains 1 [Source:MGI Symbol;Acc:MGI:2442368]
ENSMUSG00000068079	369.79	458.054	398.386	377.228	617.1	676.083	655.925	676.862	656.493	400.864	-0.715568	1.32331e-10	Tcf15	transcription factor 15 [Source:MGI Symbol;Acc:MGI:104664]
ENSMUSG00000025780	145.037	123.268	117.419	89.7708	310.42	481.267	243.465	408.962	361.029	118.874	-1.60439	1.33356e-10	Itih5	inter-alpha (globulin) inhibitor H5 [Source:MGI Symbol;Acc:MGI:1925751]
ENSMUSG00000026029	122.894	96.6535	141.532	99.3209	278.63	247.949	319.369	231.153	269.275	115.1	-1.22591	1.34712e-10	Casp8	caspase 8 [Source:MGI Symbol;Acc:MGI:1261423]
ENSMUSG00000036427	23090.8	21499.1	21975.2	24023.2	16376.5	14855.4	14355.2	12868.7	14613.9	22647.1	0.631938	1.45074e-10	Gpi1	glucose phosphate isomerase 1 [Source:MGI Symbol;Acc:MGI:95797]
ENSMUSG00000096010	62.0007	236.731	185.564	36.2903	4.675	2.31008	1.43215	1.1854	2.40066	130.147	5.7574	1.49953e-10	Hist4h4	histone cluster 4, H4 [Source:MGI Symbol;Acc:MGI:2448443]
ENSMUSG00000021371	4092.05	4453.07	4380.15	4737.8	3183.68	3202.54	3135.69	3131.82	3163.43	4415.76	0.481255	1.50192e-10	Mcur1	mitochondrial calcium uniporter regulator 1 [Source:MGI Symbol;Acc:MGI:1923387]
ENSMUSG00000029312	244.681	250.739	267.338	226.337	431.035	398.874	453.992	404.221	422.03	247.274	-0.774008	1.50192e-10	Klhl8	kelch-like 8 [Source:MGI Symbol;Acc:MGI:2179430]
ENSMUSG00000000753	415.183	354.396	362.741	333.298	726.495	922.492	590.762	770.509	752.565	366.405	-1.03824	1.5096e-10	Serpinf1	serine (or cysteine) peptidase inhibitor, clade F, member 1 [Source:MGI Symbol;Acc:MGI:108080]
ENSMUSG00000029455	14996.4	14852.4	14136.4	14227.7	10266.3	11360.2	10763.3	10253.7	10660.9	14553.2	0.448759	1.51595e-10	Aldh2	aldehyde dehydrogenase 2, mitochondrial [Source:MGI Symbol;Acc:MGI:99600]
ENSMUSG00000040710	86.3581	131.673	126.854	116.511	289.85	251.799	316.505	472.974	332.782	115.349	-1.52671	1.54612e-10	St8sia4	ST8 alpha-N-acetyl-neuraminide alpha-2,8-sialyltransferase 4 [Source:MGI Symbol;Acc:MGI:106018]
ENSMUSG00000039304	273.467	285.758	208.628	174.767	485.265	579.83	484.067	520.39	517.388	235.655	-1.14064	1.58918e-10	Tnfsf10	tumor necrosis factor (ligand) superfamily, member 10 [Source:MGI Symbol;Acc:MGI:107414]
ENSMUSG00000022504	45.3934	42.0233	44.0321	38.2003	123.42	107.804	138.202	97.2027	116.657	42.4123	-1.46767	1.63849e-10	Ciita	class II transactivator [Source:MGI Symbol;Acc:MGI:108445]
ENSMUSG00000027412	168.288	128.871	148.871	127.016	355.3	340.352	332.259	243.007	317.729	143.261	-1.15176	1.72448e-10	Lpin3	lipin 3 [Source:MGI Symbol;Acc:MGI:1891342]
ENSMUSG00000049090	2099.17	2143.19	1966.77	2132.53	2922.81	3355.01	2978.16	3536.04	3198	2085.41	-0.616519	1.77543e-10	Zadh2	zinc binding alcohol dehydrogenase, domain containing 2 [Source:MGI Symbol;Acc:MGI:2444835]
ENSMUSG00000028793	1504.62	1673.93	1449.91	1530.88	914.431	833.939	1081.27	885.492	928.784	1539.84	0.727613	1.80574e-10	Rnf19b	ring finger protein 19B [Source:MGI Symbol;Acc:MGI:1922484]
ENSMUSG00000031129	68.6436	53.2295	56.6127	41.0654	125.29	154.775	155.388	138.692	143.536	54.8878	-1.39434	1.80626e-10	Slc9a9	solute carrier family 9 (sodium/hydrogen exchanger), member 9 [Source:MGI Symbol;Acc:MGI:2679732]
ENSMUSG00000040488	7433.44	5199.68	6040.79	5003.29	13522	15479.8	10134.6	11767.4	12726	5919.3	-1.10426	1.82191e-10	Ltbp4	latent transforming growth factor beta binding protein 4 [Source:MGI Symbol;Acc:MGI:1321395]
ENSMUSG00000023473	36.5361	36.4202	23.0644	25.7852	94.4351	129.364	82.3486	113.798	104.987	30.4515	-1.79742	1.82191e-10	Celsr3	cadherin, EGF LAG seven-pass G-type receptor 3 [Source:MGI Symbol;Acc:MGI:1858236]
ENSMUSG00000047557	28.786	28.0155	36.6934	33.4253	94.4351	87.013	94.5219	88.9049	91.2187	31.7301	-1.51501	1.96763e-10	Lxn	latexin [Source:MGI Symbol;Acc:MGI:107633]
ENSMUSG00000040690	233.61	117.665	158.306	146.116	441.32	456.626	387.397	368.659	413.5	163.924	-1.33219	2.00412e-10	Col16a1	collagen, type XVI, alpha 1 [Source:MGI Symbol;Acc:MGI:1095396]
ENSMUSG00000110594	39.8576	117.665	67.0966	24.8302	5.61	3.85013	2.8643	0	3.08111	62.3624	4.28014	2.0114e-10	Gm33103	predicted gene, 33103 [Source:MGI Symbol;Acc:MGI:5592262]
ENSMUSG00000032712	2336.1	3621.01	2182.74	3251.8	1304.33	1161.97	1462.23	1172.36	1275.22	2847.91	1.15844	2.01174e-10	Resf1	retroelement silencing factor 1 [Source:MGI Symbol;Acc:MGI:1914496]
ENSMUSG00000003531	1392.8	1521.24	1572.58	1522.28	1027.57	981.784	1037.59	1089.38	1034.08	1502.23	0.539989	2.0516e-10	Dgcr6	DiGeorge syndrome critical region gene 6 [Source:MGI Symbol;Acc:MGI:1202877]
ENSMUSG00000047180	84.1438	61.6341	75.4836	79.2657	174.845	160.166	220.551	167.141	180.676	75.1318	-1.26209	2.0516e-10	Neurl3	neuralized E3 ubiquitin protein ligase 3 [Source:MGI Symbol;Acc:MGI:2429944]
ENSMUSG00000016239	122.894	308.171	264.193	421.159	18.7	9.24032	10.7411	37.9327	19.1535	279.104	3.8897	2.10112e-10	Lonrf3	LON peptidase N-terminal domain and ring finger 3 [Source:MGI Symbol;Acc:MGI:1921615]
ENSMUSG00000069270	80.8224	120.467	144.677	71.6256	21.505	24.6409	18.6179	33.1911	24.4887	104.398	2.10795	2.118e-10	Hist1h2ac	histone cluster 1, H2ac [Source:MGI Symbol;Acc:MGI:2448287]
ENSMUSG00000074743	1401.66	1666.92	1458.3	1365.66	2688.13	2370.91	2524.88	2128.98	2428.22	1473.14	-0.72263	2.21382e-10	Thbd	thrombomodulin [Source:MGI Symbol;Acc:MGI:98736]
ENSMUSG00000089887	28.786	65.8365	40.887	28.6503	1.87	0	1.43215	1.1854	1.12189	41.0399	5.22286	2.32256e-10	4930428N03Rik	RIKEN cDNA 4930428N03 gene [Source:MGI Symbol;Acc:MGI:1921121]
ENSMUSG00000029480	1339.66	1213.07	1037.9	1199.49	733.975	687.634	744.002	586.772	688.096	1197.53	0.797	2.39588e-10	Dhx37	DEAH (Asp-Glu-Ala-His) box polypeptide 37 [Source:MGI Symbol;Acc:MGI:3028576]
ENSMUSG00000090019	81.9295	113.463	109.032	94.5458	225.335	205.597	200.501	197.961	207.349	99.7425	-1.06131	2.39588e-10	Gimap1	GTPase, IMAP family member 1 [Source:MGI Symbol;Acc:MGI:109368]
ENSMUSG00000089983	32.1075	60.2334	44.0321	54.4355	8.415	7.70027	7.16075	8.29779	7.89345	47.7021	2.60009	2.56751e-10	2010320O07Rik	RIKEN cDNA 2010320O07 gene [Source:MGI Symbol;Acc:MGI:1917131]
ENSMUSG00000024240	1521.23	1664.12	1582.01	1733.34	1000.45	1041.08	963.837	752.728	939.523	1625.18	0.788491	2.56751e-10	Epc1	enhancer of polycomb homolog 1 [Source:MGI Symbol;Acc:MGI:1278322]
ENSMUSG00000026380	137.287	84.0466	91.2094	110.781	26.18	38.5013	26.4948	36.7473	31.9809	105.831	1.73607	2.59557e-10	Tfcp2l1	transcription factor CP2-like 1 [Source:MGI Symbol;Acc:MGI:2444691]
ENSMUSG00000032059	172.716	158.288	159.354	171.902	349.69	287.99	316.505	278.569	308.188	165.565	-0.895956	2.63303e-10	Alg9	asparagine-linked glycosylation 9 (alpha 1,2 mannosyltransferase) [Source:MGI Symbol;Acc:MGI:1924753]
ENSMUSG00000037349	745.116	656.964	704.514	764.962	443.19	476.647	438.238	481.272	459.837	717.889	0.645965	2.68735e-10	Nudt22	nudix (nucleoside diphosphate linked moiety X)-type motif 22 [Source:MGI Symbol;Acc:MGI:1915573]
ENSMUSG00000022371	245.789	149.883	179.274	129.881	591.855	701.494	340.852	595.07	557.318	176.207	-1.66042	2.78618e-10	Col14a1	collagen, type XIV, alpha 1 [Source:MGI Symbol;Acc:MGI:1341272]
ENSMUSG00000052852	492.684	585.524	662.579	498.514	1063.1	1107.3	885.785	1056.19	1028.09	559.825	-0.877112	2.7951e-10	Reep1	receptor accessory protein 1 [Source:MGI Symbol;Acc:MGI:1098827]
ENSMUSG00000064360	4010.12	3920.77	3715.47	4351.02	6366.42	5409.44	6350.15	6064.5	6047.63	3999.35	-0.596365	2.87995e-10	mt-Nd3	mitochondrially encoded NADH dehydrogenase 3 [Source:MGI Symbol;Acc:MGI:102499]
ENSMUSG00000001964	1473.62	1566.07	1350.32	1570.03	972.401	1008.74	1046.9	998.105	1006.54	1490.01	0.564882	3.04528e-10	Emd	emerin [Source:MGI Symbol;Acc:MGI:108117]
ENSMUSG00000015093	146.145	240.933	174.032	149.936	71.06	65.4523	55.8538	39.1181	57.8711	177.762	1.6044	3.08937e-10	Clic3	chloride intracellular channel 3 [Source:MGI Symbol;Acc:MGI:1916704]
ENSMUSG00000042286	2162.27	1425.99	1618.7	1382.85	3582.92	3568.3	3639.81	2821.25	3403.07	1647.46	-1.04678	3.14567e-10	Stab1	stabilin 1 [Source:MGI Symbol;Acc:MGI:2178742]
ENSMUSG00000030739	6605.29	7536.17	6943.45	7311.54	4980.75	5213.85	5057.64	4621.87	4968.53	7099.11	0.514299	3.18842e-10	Myh14	myosin, heavy polypeptide 14 [Source:MGI Symbol;Acc:MGI:1919210]
ENSMUSG00000001211	5831.39	5478.43	5814.34	6216.15	8546.84	8311.67	7987.1	7739.46	8146.27	5835.08	-0.481143	3.21828e-10	Agpat3	1-acylglycerol-3-phosphate O-acyltransferase 3 [Source:MGI Symbol;Acc:MGI:1336186]
ENSMUSG00000023826	450.612	491.672	443.466	398.238	251.515	256.419	281.417	258.417	261.942	445.997	0.762805	3.21865e-10	Prkn	parkin RBR E3 ubiquitin protein ligase [Source:MGI Symbol;Acc:MGI:1355296]
ENSMUSG00000027500	73.0723	124.669	113.225	93.5908	232.815	236.398	253.491	207.445	232.537	101.139	-1.21107	3.21865e-10	Stmn2	stathmin-like 2 [Source:MGI Symbol;Acc:MGI:98241]
ENSMUSG00000086822	48.7148	51.8287	51.3708	58.2555	14.96	9.24032	10.025	14.2248	12.1125	52.5425	2.14808	3.30823e-10	5330413P13Rik	RIKEN cDNA 5330413P13 gene [Source:MGI Symbol;Acc:MGI:3041161]
ENSMUSG00000085287	194.859	183.502	137.338	142.296	58.905	65.4523	74.4718	68.7531	66.8955	164.499	1.29137	3.42988e-10	4833418N02Rik	RIKEN cDNA 4833418N02 gene [Source:MGI Symbol;Acc:MGI:1921847]
ENSMUSG00000031886	21.036	9.80543	8.38707	9.55008	63.58	83.9329	49.4092	72.3093	67.3079	12.1946	-2.46312	3.63296e-10	Ces2e	carboxylesterase 2E [Source:MGI Symbol;Acc:MGI:2443170]
ENSMUSG00000037434	705.258	658.365	641.611	635.081	968.661	952.523	1014.68	936.465	968.082	660.079	-0.554022	3.78547e-10	Slc30a1	solute carrier family 30 (zinc transporter), member 1 [Source:MGI Symbol;Acc:MGI:1345281]
ENSMUSG00000018666	771.687	818.053	838.707	841.362	1258.51	1107.3	1235.95	1252.97	1213.68	817.453	-0.568973	3.84245e-10	Cbx1	chromobox 1 [Source:MGI Symbol;Acc:MGI:105369]
ENSMUSG00000029309	6022.93	5075.01	4821.52	3928.9	12644	11960.1	9890.43	8162.65	10664.3	4962.09	-1.10396	3.93322e-10	Sparcl1	SPARC-like 1 [Source:MGI Symbol;Acc:MGI:108110]
ENSMUSG00000038375	14778.3	15677.5	14964.6	15630.6	22999.1	24449.9	20454.7	20973.3	22219.2	15262.8	-0.541849	4.02322e-10	Trp53inp2	transformation related protein 53 inducible nuclear protein 2 [Source:MGI Symbol;Acc:MGI:1915978]
ENSMUSG00000044921	236.931	207.315	265.241	234.932	381.48	415.814	433.941	478.901	427.534	236.105	-0.851122	4.03743e-10	Rassf9	Ras association (RalGDS/AF-6) domain family (N-terminal) member 9 [Source:MGI Symbol;Acc:MGI:2384307]
ENSMUSG00000110382	23.2503	60.2334	44.0321	27.6952	0	1.54005	2.14822	2.3708	1.51477	38.8028	4.66949	4.30024e-10	Gm29895	predicted gene, 29895 [Source:MGI Symbol;Acc:MGI:5589054]
ENSMUSG00000037060	317.754	358.599	351.209	316.108	524.535	513.608	555.674	531.058	531.219	335.917	-0.664251	4.50454e-10	Cavin3	caveolae associated 3 [Source:MGI Symbol;Acc:MGI:1923422]
ENSMUSG00000025270	40.9648	32.2178	78.6288	30.5603	226.27	267.969	118.152	285.681	224.518	45.5929	-2.29296	4.6881e-10	Alas2	aminolevulinic acid synthase 2, erythroid [Source:MGI Symbol;Acc:MGI:87990]
ENSMUSG00000085962	13.2859	7.00388	8.38707	16.2351	54.23	50.0517	58.7181	59.2699	55.5675	11.228	-2.27336	4.77113e-10	Gm16984	predicted gene, 16984 [Source:MGI Symbol;Acc:MGI:4439908]
ENSMUSG00000003469	304.468	238.132	276.773	295.098	435.71	544.409	624.417	611.665	554.051	278.618	-0.98881	5.13239e-10	Phyhip	phytanoyl-CoA hydroxylase interacting protein [Source:MGI Symbol;Acc:MGI:1860417]
ENSMUSG00000021484	2516.56	2585.83	2580.07	2320.67	3584.79	3609.89	3515.21	3289.48	3499.84	2500.79	-0.485881	5.43008e-10	Lman2	lectin, mannose-binding 2 [Source:MGI Symbol;Acc:MGI:1914140]
ENSMUSG00000033033	84.1438	88.2489	80.7256	97.4109	207.57	210.987	166.845	173.068	189.618	87.6323	-1.11303	5.44649e-10	Calhm2	calcium homeostasis modulator family member 2 [Source:MGI Symbol;Acc:MGI:1919941]
ENSMUSG00000035399	538.078	571.517	523.144	566.32	363.715	311.091	349.445	285.681	327.483	549.764	0.743584	5.49481e-10	Oser1	oxidative stress responsive serine rich 1 [Source:MGI Symbol;Acc:MGI:1913930]
ENSMUSG00000086938	2637.24	2823.96	2406.04	2255.73	1460.47	1010.28	1272.47	798.958	1135.54	2530.74	1.15501	5.58187e-10	4930481A15Rik	RIKEN cDNA 4930481A15 gene [Source:MGI Symbol;Acc:MGI:1922181]
ENSMUSG00000024471	3563.93	4296.18	3942.97	4217.32	2214.08	1944.32	2204.79	1315.79	1919.75	4005.1	1.05999	5.73616e-10	Myot	myotilin [Source:MGI Symbol;Acc:MGI:1889800]
ENSMUSG00000027547	14.393	9.80543	16.7741	10.5051	76.67	62.3722	45.1127	65.1969	62.338	12.8694	-2.26106	5.75386e-10	Sall4	spalt like transcription factor 4 [Source:MGI Symbol;Acc:MGI:2139360]
ENSMUSG00000040820	601.185	444.046	512.66	488.009	261.8	304.931	294.307	280.939	285.494	511.475	0.840872	5.88613e-10	Hlcs	holocarboxylase synthetase (biotin- [propriony-Coenzyme A-carboxylase (ATP-hydrolysing)] ligase) [Source:MGI Symbol;Acc:MGI:894646]
ENSMUSG00000043635	262.396	229.727	314.515	291.278	96.3051	92.4032	108.843	156.473	113.506	274.479	1.28748	5.89075e-10	Adamts3	a disintegrin-like and metallopeptidase (reprolysin type) with thrombospondin type 1 motif, 3 [Source:MGI Symbol;Acc:MGI:3045353]
ENSMUSG00000027669	379.754	316.575	329.193	281.727	683.485	584.45	585.033	533.429	596.6	326.812	-0.869811	5.90726e-10	Gnb4	guanine nucleotide binding protein (G protein), beta 4 [Source:MGI Symbol;Acc:MGI:104581]
ENSMUSG00000020311	2064.85	2319.69	2349.43	2067.59	1415.59	1397.6	1302.54	1583.69	1424.86	2200.39	0.628003	5.943e-10	Erlec1	endoplasmic reticulum lectin 1 [Source:MGI Symbol;Acc:MGI:1914003]
ENSMUSG00000029373	129.537	155.486	164.596	154.711	328.185	410.424	958.108	541.727	559.611	151.083	-1.89012	6.07203e-10	Pf4	platelet factor 4 [Source:MGI Symbol;Acc:MGI:1888711]
ENSMUSG00000039109	879.082	1192.06	1098.71	900.573	1603.53	1911.21	2280.7	2183.5	1994.73	1017.61	-0.972107	6.1407e-10	F13a1	coagulation factor XIII, A1 subunit [Source:MGI Symbol;Acc:MGI:1921395]
ENSMUSG00000029482	363.147	570.116	401.531	293.188	156.145	136.295	174.722	169.512	159.169	406.995	1.35168	6.18079e-10	Aacs	acetoacetyl-CoA synthetase [Source:MGI Symbol;Acc:MGI:1926144]
ENSMUSG00000034610	1414.94	1350.35	1326.21	1350.38	837.76	909.402	954.528	994.549	924.06	1360.47	0.558798	6.38898e-10	Tut4	terminal uridylyl transferase 4 [Source:MGI Symbol;Acc:MGI:2445126]
ENSMUSG00000042851	707.472	502.879	488.547	609.295	243.1	272.589	262.8	335.468	278.489	577.048	1.05548	6.51544e-10	Zc3h6	zinc finger CCCH type containing 6 [Source:MGI Symbol;Acc:MGI:1926001]
ENSMUSG00000022108	23563.6	24185.8	22534	22991.8	18407.4	18411.3	18117.4	18213.6	18287.4	23318.8	0.350552	6.69867e-10	Itm2b	integral membrane protein 2B [Source:MGI Symbol;Acc:MGI:1309517]
ENSMUSG00000024603	2844.28	3099.92	3042.41	3044.57	2233.72	2114.49	2242.75	2003.32	2148.57	3007.79	0.484403	6.79454e-10	Dctn4	dynactin 4 [Source:MGI Symbol;Acc:MGI:1914915]
ENSMUSG00000001508	5346.45	5373.38	5359.34	5342.32	3868.1	3938.69	3677.05	3237.32	3680.29	5355.37	0.540516	6.86746e-10	Sgca	sarcoglycan, alpha (dystrophin-associated glycoprotein) [Source:MGI Symbol;Acc:MGI:894698]
ENSMUSG00000057156	74.1794	47.6264	57.6611	63.9856	160.82	132.445	167.562	137.506	149.583	60.8631	-1.29069	7.31881e-10	Homez	homeodomain leucine zipper-encoding gene [Source:MGI Symbol;Acc:MGI:2678023]
ENSMUSG00000036968	90.7868	84.0466	77.5804	86.9058	172.04	157.855	184.747	184.922	174.891	84.8299	-1.04185	7.40909e-10	Cnpy4	canopy FGF signaling regulator 4 [Source:MGI Symbol;Acc:MGI:1913705]
ENSMUSG00000044229	301.146	194.708	177.177	190.047	592.79	523.618	529.179	411.333	514.23	215.769	-1.25426	7.44753e-10	Nxpe4	neurexophilin and PC-esterase domain family, member 4 [Source:MGI Symbol;Acc:MGI:1924792]
ENSMUSG00000020928	116.251	149.883	136.29	109.826	364.65	321.101	321.518	215.742	305.753	128.063	-1.26389	7.44896e-10	Higd1b	HIG1 domain family, member 1B [Source:MGI Symbol;Acc:MGI:1922939]
ENSMUSG00000072969	501.541	430.038	444.515	445.989	238.425	278.75	284.998	280.939	270.778	455.521	0.750254	7.54699e-10	Armcx5	armadillo repeat containing, X-linked 5 [Source:MGI Symbol;Acc:MGI:2148026]
ENSMUSG00000029669	573.507	621.945	665.724	528.12	1027.57	999.495	892.229	1128.5	1011.95	597.324	-0.759942	7.56867e-10	Tspan12	tetraspanin 12 [Source:MGI Symbol;Acc:MGI:1889818]
ENSMUSG00000004667	3284.93	3546.76	3478.54	3075.13	2323.48	2426.35	2401	2215.51	2341.58	3346.34	0.513918	7.9158e-10	Polr2e	polymerase (RNA) II (DNA directed) polypeptide E [Source:MGI Symbol;Acc:MGI:1913670]
ENSMUSG00000057367	1420.48	1605.29	1544.27	1597.73	1107.98	1018.75	1074.11	1094.12	1073.74	1541.94	0.522596	8.00034e-10	Birc2	baculoviral IAP repeat-containing 2 [Source:MGI Symbol;Acc:MGI:1197009]
ENSMUSG00000098708	607.828	371.206	394.192	313.243	143.055	190.197	131.042	103.13	141.856	421.617	1.56654	8.41936e-10	Gm27252	predicted gene 27252 [Source:MGI Symbol;Acc:MGI:5521095]
ENSMUSG00000015542	782.759	783.034	843.949	876.698	559.13	541.329	551.378	571.362	555.8	821.61	0.566658	8.5179e-10	Nat9	N-acetyltransferase 9 (GCN5-related, putative) [Source:MGI Symbol;Acc:MGI:1913426]
ENSMUSG00000020889	2390.35	1536.65	1810.56	1650.25	3618.45	3128.62	3739.34	3705.55	3547.99	1846.95	-0.94144	8.63636e-10	Nr1d1	nuclear receptor subfamily 1, group D, member 1 [Source:MGI Symbol;Acc:MGI:2444210]
ENSMUSG00000042109	5851.32	5039.99	4838.29	6255.3	3417.43	2748.23	3281.06	2447.85	2973.64	5496.23	0.885977	8.76158e-10	Csdc2	cold shock domain containing C2, RNA binding [Source:MGI Symbol;Acc:MGI:2146027]
ENSMUSG00000017288	1305.34	1266.3	1260.16	1195.67	865.81	833.939	880.056	723.093	825.725	1256.87	0.603259	9.13988e-10	Vps53	VPS53 GARP complex subunit [Source:MGI Symbol;Acc:MGI:1915549]
ENSMUSG00000092035	100.751	98.0543	92.2578	102.186	39.27	37.7313	43.6806	33.1911	38.4683	98.3123	1.34236	9.39376e-10	Peg10	paternally expressed 10 [Source:MGI Symbol;Acc:MGI:2157785]
ENSMUSG00000011148	5901.14	7411.51	7105.95	7435.7	4706.79	4380.68	4190.47	4602.9	4470.21	6963.57	0.639662	9.53997e-10	Adssl1	adenylosuccinate synthetase like 1 [Source:MGI Symbol;Acc:MGI:87947]
ENSMUSG00000019647	328.825	201.712	254.757	176.677	548.845	530.548	612.244	523.946	553.896	240.493	-1.2039	9.61153e-10	Sema6a	sema domain, transmembrane domain (TM), and cytoplasmic domain, (semaphorin) 6A [Source:MGI Symbol;Acc:MGI:1203727]
ENSMUSG00000034872	106.287	89.6497	115.322	79.2657	228.14	248.719	296.455	183.737	239.263	97.6311	-1.29811	9.88598e-10	Gipc3	GIPC PDZ domain containing family, member 3 [Source:MGI Symbol;Acc:MGI:2387006]
ENSMUSG00000046668	331.04	294.163	342.822	296.053	618.97	535.169	609.38	862.97	656.622	316.019	-1.05145	1.01175e-09	Cxxc5	CXXC finger 5 [Source:MGI Symbol;Acc:MGI:1914643]
ENSMUSG00000034903	6009.64	6225.05	6035.55	5402.48	3972.82	3991.82	3576.79	3054.77	3649.05	5918.18	0.697	1.02291e-09	Cobll1	Cobl-like 1 [Source:MGI Symbol;Acc:MGI:2442894]
ENSMUSG00000026743	1635.27	1395.17	1648.06	1685.59	946.221	967.924	1013.96	738.503	916.652	1591.02	0.794034	1.0605e-09	Mllt10	myeloid/lymphoid or mixed-lineage leukemia; translocated to, 10 [Source:MGI Symbol;Acc:MGI:1329038]
ENSMUSG00000024381	191.538	135.875	169.838	148.981	334.73	314.171	442.534	314.131	351.391	161.558	-1.12105	1.06609e-09	Bin1	bridging integrator 1 [Source:MGI Symbol;Acc:MGI:108092]
ENSMUSG00000026576	9925.65	10169.6	10294.1	10895.7	7380.89	8115.31	7483.7	7421.78	7600.42	10321.3	0.441421	1.08372e-09	Atp1b1	ATPase, Na+/K+ transporting, beta 1 polypeptide [Source:MGI Symbol;Acc:MGI:88108]
ENSMUSG00000002227	133.966	71.4396	106.935	94.5458	349.69	282.6	275.689	203.888	277.967	101.722	-1.44702	1.09727e-09	Mov10	Moloney leukemia virus 10 [Source:MGI Symbol;Acc:MGI:97054]
ENSMUSG00000003038	2688.17	2849.18	2843.22	2677.84	1776.5	1932	1648.4	2031.77	1847.17	2764.6	0.582601	1.10305e-09	Hmgn2	high mobility group nucleosomal binding domain 2 [Source:MGI Symbol;Acc:MGI:96136]
ENSMUSG00000024197	11061.6	12345	12753.6	11106.7	8036.33	6918.69	6954.52	5565.44	6868.75	11816.7	0.782475	1.10636e-09	Plin3	perilipin 3 [Source:MGI Symbol;Acc:MGI:1914155]
ENSMUSG00000030189	8235.02	8163.72	7703.52	9241.62	5265.92	5217.7	6030.78	4787.82	5325.56	8335.97	0.646131	1.13527e-09	Ybx3	Y box protein 3 [Source:MGI Symbol;Acc:MGI:2137670]
ENSMUSG00000038417	2488.89	2508.79	2179.59	2102.93	1470.76	1634.77	1403.51	1484.12	1498.29	2320.05	0.630007	1.16717e-09	Fig4	FIG4 phosphoinositide 5-phosphatase [Source:MGI Symbol;Acc:MGI:2143585]
ENSMUSG00000031883	64.215	60.2334	46.1289	26.7402	158.95	166.326	162.549	126.838	153.666	49.3294	-1.65706	1.20686e-09	Car7	carbonic anhydrase 7 [Source:MGI Symbol;Acc:MGI:103100]
ENSMUSG00000047085	1093.87	1080	1133.3	1141.23	625.515	387.323	506.265	660.267	544.843	1112.1	1.03276	1.23122e-09	Lrrc4b	leucine rich repeat containing 4B [Source:MGI Symbol;Acc:MGI:3027390]
ENSMUSG00000027010	11231	12551	12474.7	13772.2	9061.09	8409.46	7943.42	8367.73	8445.42	12507.2	0.566644	1.25586e-09	Slc25a12	solute carrier family 25 (mitochondrial carrier, Aralar), member 12 [Source:MGI Symbol;Acc:MGI:1926080]
ENSMUSG00000022383	1931.99	2266.46	2431.2	2075.23	1486.65	1424.55	1321.16	1370.32	1400.67	2176.22	0.635607	1.27116e-09	Ppara	peroxisome proliferator activated receptor alpha [Source:MGI Symbol;Acc:MGI:104740]
ENSMUSG00000049657	142.823	112.062	123.709	148.981	302.005	246.409	245.614	257.231	262.815	131.894	-0.986709	1.27727e-09	Zbtb5	zinc finger and BTB domain containing 5 [Source:MGI Symbol;Acc:MGI:1924601]
ENSMUSG00000022548	818.188	637.353	521.047	453.629	279.565	243.328	279.269	200.332	250.624	607.554	1.27377	1.30246e-09	Apod	apolipoprotein D [Source:MGI Symbol;Acc:MGI:88056]
ENSMUSG00000020846	916.725	762.022	800.965	709.571	1598.85	1238.97	1343.36	1312.24	1373.35	797.321	-0.784402	1.31026e-09	Rflnb	refilin B [Source:MGI Symbol;Acc:MGI:1923816]
ENSMUSG00000042607	127.323	81.245	101.693	84.9957	266.475	194.817	247.046	218.113	231.613	98.8142	-1.2263	1.32147e-09	Asb4	ankyrin repeat and SOCS box-containing 4 [Source:MGI Symbol;Acc:MGI:1929751]
ENSMUSG00000022528	427.362	316.575	312.418	326.613	626.45	731.525	573.576	761.026	673.144	345.742	-0.959375	1.32456e-09	Hes1	hes family bHLH transcription factor 1 [Source:MGI Symbol;Acc:MGI:104853]
ENSMUSG00000060376	4071.01	4398.44	4192.49	4002.44	3053.71	3226.41	3094.16	3020.39	3098.67	4166.09	0.426214	1.32468e-09	Bckdha	branched chain ketoacid dehydrogenase E1, alpha polypeptide [Source:MGI Symbol;Acc:MGI:107701]
ENSMUSG00000044086	1314.19	1550.66	1588.3	1057.19	2955.54	3370.41	2194.05	3091.52	2902.88	1377.59	-1.07577	1.33318e-09	Lmod3	leiomodin 3 (fetal) [Source:MGI Symbol;Acc:MGI:2444169]
ENSMUSG00000023905	2420.24	4189.72	3895.79	3150.57	1824.19	1274.39	1604.72	1293.27	1499.14	3414.08	1.18693	1.36263e-09	Tnfrsf12a	tumor necrosis factor receptor superfamily, member 12a [Source:MGI Symbol;Acc:MGI:1351484]
ENSMUSG00000023118	6153.57	6148.01	5966.35	6015.6	4366.45	4393	4416.75	3702	4219.55	6070.88	0.524098	1.39729e-09	Sympk	symplekin [Source:MGI Symbol;Acc:MGI:1915438]
ENSMUSG00000041278	1521.23	1865.83	1766.53	1818.34	1117.33	961.763	1098.46	1184.21	1090.44	1742.98	0.677629	1.43954e-09	Ttc1	tetratricopeptide repeat domain 1 [Source:MGI Symbol;Acc:MGI:1914077]
ENSMUSG00000084925	116.251	64.4357	100.645	94.5458	29.92	26.9509	32.2234	16.5956	26.4225	93.9694	1.81472	1.494e-09	1810062O18Rik	RIKEN cDNA 1810062O18 gene [Source:MGI Symbol;Acc:MGI:1922852]
ENSMUSG00000061111	1452.59	1676.73	1555.8	1538.52	1064.03	1030.3	1111.35	1123.76	1082.36	1555.91	0.523269	1.50425e-09	Mcrip1	MAPK regulated corepressor interacting protein 1 [Source:MGI Symbol;Acc:MGI:2384752]
ENSMUSG00000040811	1724.95	1847.62	1795.88	1616.83	1078.99	1246.67	1210.88	1207.92	1186.12	1746.32	0.556902	1.58265e-09	Eml2	echinoderm microtubule associated protein like 2 [Source:MGI Symbol;Acc:MGI:1919455]
ENSMUSG00000037287	1510.16	1301.32	1311.53	1417.23	944.351	877.06	918.724	989.807	932.486	1385.06	0.572882	1.58822e-09	Tbcel	tubulin folding cofactor E-like [Source:MGI Symbol;Acc:MGI:1925543]
ENSMUSG00000004266	66.4293	44.8248	44.0321	58.2555	156.145	158.626	361.618	173.068	212.364	53.3855	-1.99198	1.59817e-09	Ptpn6	protein tyrosine phosphatase, non-receptor type 6 [Source:MGI Symbol;Acc:MGI:96055]
ENSMUSG00000007122	80.8224	43.4241	51.3708	47.7504	239.36	289.53	128.177	173.068	207.534	55.8419	-1.89195	1.72043e-09	Casq1	calsequestrin 1 [Source:MGI Symbol;Acc:MGI:1309468]
ENSMUSG00000031668	276.789	245.136	228.548	267.402	400.18	420.435	449.695	420.816	422.782	254.469	-0.732271	1.77747e-09	Eif2ak3	eukaryotic translation initiation factor 2 alpha kinase 3 [Source:MGI Symbol;Acc:MGI:1341830]
ENSMUSG00000040174	1160.3	1290.11	1220.32	1151.74	784.465	818.538	857.858	708.868	792.432	1205.62	0.60175	1.82425e-09	Alkbh3	alkB homolog 3, alpha-ketoglutarate-dependent dioxygenase [Source:MGI Symbol;Acc:MGI:1916363]
ENSMUSG00000044641	34.3218	33.6186	44.0321	56.3455	144.925	117.814	128.893	98.388	122.505	42.0795	-1.53007	1.83439e-09	Pard6b	par-6 family cell polarity regulator beta [Source:MGI Symbol;Acc:MGI:2135605]
ENSMUSG00000025010	108.501	63.0349	79.6772	102.186	200.09	218.688	188.328	203.888	202.748	88.3498	-1.18725	1.85431e-09	Ccnj	cyclin J [Source:MGI Symbol;Acc:MGI:2443297]
ENSMUSG00000046709	883.51	872.683	990.723	1017.08	476.85	569.82	406.731	590.328	510.932	941	0.884375	1.86041e-09	Mapk10	mitogen-activated protein kinase 10 [Source:MGI Symbol;Acc:MGI:1346863]
ENSMUSG00000028194	98.5368	107.86	112.177	91.6808	186.065	209.447	197.637	197.961	197.778	102.564	-0.952135	1.86229e-09	Ddah1	dimethylarginine dimethylaminohydrolase 1 [Source:MGI Symbol;Acc:MGI:1916469]
ENSMUSG00000030352	1449.27	1469.41	1555.8	1136.46	2767.6	2417.11	2449.69	2147.94	2445.59	1402.74	-0.802864	1.93349e-09	Tspan9	tetraspanin 9 [Source:MGI Symbol;Acc:MGI:1924558]
ENSMUSG00000069601	3577.22	3714.86	3771.04	3650.04	2527.31	2638.11	2368.78	2029.4	2390.9	3678.29	0.620552	1.93355e-09	Ank3	ankyrin 3, epithelial [Source:MGI Symbol;Acc:MGI:88026]
ENSMUSG00000013698	1509.05	1734.16	1760.24	1494.59	2668.49	2415.57	2313.64	2735.9	2533.4	1624.51	-0.640975	1.93355e-09	Pea15a	phosphoprotein enriched in astrocytes 15A [Source:MGI Symbol;Acc:MGI:104799]
ENSMUSG00000040229	7.75009	4.20233	15.7258	9.55008	49.555	57.752	45.8288	87.7195	60.2138	9.30706	-2.65084	1.94644e-09	Gpr34	G protein-coupled receptor 34 [Source:MGI Symbol;Acc:MGI:1346334]
ENSMUSG00000054893	95.2154	88.2489	88.0642	84.0407	168.3	165.556	188.328	209.815	183	88.8923	-1.03866	1.99438e-09	Zfp667	zinc finger protein 667 [Source:MGI Symbol;Acc:MGI:2442757]
ENSMUSG00000022096	376.433	362.801	351.209	355.263	760.155	773.107	524.167	663.823	680.313	361.426	-0.912114	2.00843e-09	Hr	hairless [Source:MGI Symbol;Acc:MGI:96223]
ENSMUSG00000022994	20032.9	20351.9	20432	19128.8	13385.5	12385.1	12718.9	9417.99	11976.9	19986.4	0.738574	2.02717e-09	Adcy6	adenylate cyclase 6 [Source:MGI Symbol;Acc:MGI:87917]
ENSMUSG00000097632	107.394	99.4551	84.9191	89.7708	39.27	36.1913	37.2359	36.7473	37.3611	95.3848	1.34982	2.07071e-09	4930552P12Rik	RIKEN cDNA 4930552P12 gene [Source:MGI Symbol;Acc:MGI:1924844]
ENSMUSG00000051735	24.3574	28.0155	31.4515	22.9202	86.02	65.4523	98.8183	90.0903	85.0952	26.6862	-1.67591	2.10267e-09	Rinl	Ras and Rab interactor-like [Source:MGI Symbol;Acc:MGI:2444024]
ENSMUSG00000010307	527.006	488.871	534.676	472.729	797.555	807.758	724.668	902.088	808.017	505.82	-0.673261	2.14418e-09	Tmem86a	transmembrane protein 86A [Source:MGI Symbol;Acc:MGI:1915143]
ENSMUSG00000114212	116.251	274.552	275.725	179.542	59.84	34.6512	12.8893	41.4889	37.2174	211.517	2.51738	2.18078e-09	Gm47985	predicted gene, 47985 [Source:MGI Symbol;Acc:MGI:6097275]
ENSMUSG00000020641	357.611	254.941	230.644	126.061	798.49	713.815	755.459	619.963	721.932	242.315	-1.57771	2.30413e-09	Rsad2	radical S-adenosyl methionine domain containing 2 [Source:MGI Symbol;Acc:MGI:1929628]
ENSMUSG00000047989	1227.84	1064.59	1076.69	1103.03	730.235	794.668	774.077	731.391	757.593	1118.04	0.560508	2.30464e-09	Ino80c	INO80 complex subunit C [Source:MGI Symbol;Acc:MGI:2443014]
ENSMUSG00000025137	2372.63	2181.01	2215.24	2336.91	1668.98	1657.87	1570.35	1431.96	1582.29	2276.45	0.524085	2.37581e-09	Pcyt2	phosphate cytidylyltransferase 2, ethanolamine [Source:MGI Symbol;Acc:MGI:1915921]
ENSMUSG00000010830	67.5365	58.8326	78.6288	48.7054	139.315	147.845	163.265	203.888	163.578	63.4258	-1.36269	2.39386e-09	Kdelr3	KDEL (Lys-Asp-Glu-Leu) endoplasmic reticulum protein retention receptor 3 [Source:MGI Symbol;Acc:MGI:2145953]
ENSMUSG00000090222	118.466	166.692	179.274	114.601	311.355	287.99	305.764	352.063	314.293	144.758	-1.12119	2.42845e-09	Ifi203-ps	interferon activated gene 203, pseudogene [Source:MGI Symbol;Acc:MGI:3840117]
ENSMUSG00000022433	3107.79	2483.58	2650.31	3024.51	1898.05	1861.15	1785.89	1652.45	1799.39	2816.55	0.646488	2.49938e-09	Csnk1e	casein kinase 1, epsilon [Source:MGI Symbol;Acc:MGI:1351660]
ENSMUSG00000029096	2794.46	2654.47	2676.52	2524.09	4126.16	3939.46	3470.1	3792.09	3831.95	2662.39	-0.525298	2.50482e-09	Htra3	HtrA serine peptidase 3 [Source:MGI Symbol;Acc:MGI:1925808]
ENSMUSG00000052760	37.6433	35.0194	28.3064	26.7402	93.5001	77.7727	93.0897	92.4611	89.2059	31.9273	-1.49079	2.57756e-09	A630001G21Rik	RIKEN cDNA A630001G21 gene [Source:MGI Symbol;Acc:MGI:2443131]
ENSMUSG00000069114	831.474	1491.83	1037.9	1150.79	552.585	465.096	539.921	566.62	531.056	1128	1.08651	2.58313e-09	Zbtb10	zinc finger and BTB domain containing 10 [Source:MGI Symbol;Acc:MGI:2139883]
ENSMUSG00000053604	217.002	264.747	246.37	274.087	487.135	412.734	403.15	487.199	447.555	250.552	-0.83402	2.59096e-09	Rpia	ribose 5-phosphate isomerase A [Source:MGI Symbol;Acc:MGI:103254]
ENSMUSG00000030589	18.8216	18.2101	15.7258	23.8752	72.93	98.5634	146.079	55.7137	93.3216	19.1582	-2.28803	2.59861e-09	Rasgrp4	RAS guanyl releasing protein 4 [Source:MGI Symbol;Acc:MGI:2386851]
ENSMUSG00000048251	12.1787	23.8132	13.629	18.1452	55.165	90.8632	58.7181	96.0173	75.1909	16.9415	-2.16227	2.61811e-09	Bcl11b	B cell leukemia/lymphoma 11B [Source:MGI Symbol;Acc:MGI:1929913]
ENSMUSG00000037692	881.296	728.404	811.449	734.401	1222.98	1418.39	1367.7	1143.91	1288.25	788.887	-0.708467	2.63221e-09	Ahdc1	AT hook, DNA binding motif, containing 1 [Source:MGI Symbol;Acc:MGI:2444218]
ENSMUSG00000026853	11476.8	12280.6	11846.7	11957.7	17113.3	17570.5	15924.1	15166	16443.5	11890.4	-0.467868	2.91011e-09	Crat	carnitine acetyltransferase [Source:MGI Symbol;Acc:MGI:109501]
ENSMUSG00000014846	501.541	399.221	413.063	412.564	652.63	770.027	796.991	922.24	785.472	431.597	-0.862134	2.93187e-09	Tppp3	tubulin polymerization-promoting protein family member 3 [Source:MGI Symbol;Acc:MGI:1915221]
ENSMUSG00000031812	12111.2	11354.7	10917.9	11470.6	8554.32	8307.82	8381.66	7356.58	8150.09	11463.6	0.491905	2.95869e-09	Map1lc3b	microtubule-associated protein 1 light chain 3 beta [Source:MGI Symbol;Acc:MGI:1914693]
ENSMUSG00000058656	42.0719	63.0349	80.7256	59.2105	175.78	158.626	136.054	209.815	170.069	61.2607	-1.46698	3.05132e-09	Samd12	sterile alpha motif domain containing 12 [Source:MGI Symbol;Acc:MGI:2444518]
ENSMUSG00000039616	415.183	410.427	337.58	403.014	218.79	204.827	249.91	194.405	216.983	391.551	0.845926	3.08623e-09	Mocos	molybdenum cofactor sulfurase [Source:MGI Symbol;Acc:MGI:1915841]
ENSMUSG00000066000	136.18	133.074	128.951	120.331	230.01	231.008	229.86	227.596	229.619	129.634	-0.82808	3.1251e-09	Zfp979	zinc finger protein 979 [Source:MGI Symbol;Acc:MGI:2148252]
ENSMUSG00000006169	2990.43	3469.72	3391.52	3066.53	2195.38	2220.76	2383.81	2201.28	2250.31	3229.55	0.520328	3.15051e-09	Clint1	clathrin interactor 1 [Source:MGI Symbol;Acc:MGI:2144243]
ENSMUSG00000035181	713.008	851.672	743.304	678.056	1111.72	1295.95	1223.77	1116.65	1187.02	746.51	-0.672635	3.18234e-09	Heatr5a	HEAT repeat containing 5A [Source:MGI Symbol;Acc:MGI:2444133]
ENSMUSG00000040170	5814.78	4366.22	4885.47	5179.97	2296.36	3220.25	2010.02	1785.21	2327.96	5061.61	1.12015	3.24399e-09	Fmo2	flavin containing monooxygenase 2 [Source:MGI Symbol;Acc:MGI:1916776]
ENSMUSG00000030269	1141.48	1098.21	1117.58	1186.12	830.28	829.319	815.609	768.138	810.837	1135.85	0.485782	3.2643e-09	Mtmr14	myotubularin related protein 14 [Source:MGI Symbol;Acc:MGI:1916075]
ENSMUSG00000047658	169.395	116.264	112.177	77.3557	263.67	397.334	303.616	335.468	325.022	118.798	-1.45538	3.3392e-09	Gal3st3	galactose-3-O-sulfotransferase 3 [Source:MGI Symbol;Acc:MGI:3617843]
ENSMUSG00000066975	29.8932	40.6225	42.9837	68.7606	126.225	129.364	138.919	149.36	135.967	45.565	-1.56296	3.34986e-09	Cryba4	crystallin, beta A4 [Source:MGI Symbol;Acc:MGI:102716]
ENSMUSG00000069255	385.29	431.439	477.015	416.384	712.47	670.693	673.827	633.003	672.498	427.532	-0.654279	3.3576e-09	Dusp22	dual specificity phosphatase 22 [Source:MGI Symbol;Acc:MGI:1915926]
ENSMUSG00000036887	1055.12	1037.98	1100.8	1110.67	1563.32	1526.19	1601.14	1897.82	1647.12	1076.14	-0.612026	3.41207e-09	C1qa	complement component 1, q subcomponent, alpha polypeptide [Source:MGI Symbol;Acc:MGI:88223]
ENSMUSG00000031221	1710.56	1909.26	1770.72	1801.15	1176.23	1255.91	1261.72	1357.28	1262.79	1797.92	0.509996	3.50517e-09	Igbp1	immunoglobulin (CD79A) binding protein 1 [Source:MGI Symbol;Acc:MGI:1346500]
ENSMUSG00000021190	1399.44	1396.57	1370.24	1323.64	2136.48	2400.17	3470.82	2458.52	2616.5	1372.47	-0.931494	3.58546e-09	Lgmn	legumain [Source:MGI Symbol;Acc:MGI:1330838]
ENSMUSG00000030098	407.433	161.089	250.564	195.777	757.35	779.267	817.758	611.665	741.51	253.716	-1.54621	3.7653e-09	Grip2	glutamate receptor interacting protein 2 [Source:MGI Symbol;Acc:MGI:2681173]
ENSMUSG00000062098	543.613	448.248	428.789	383.913	995.776	898.621	951.664	685.16	882.805	451.141	-0.9708	3.83008e-09	Btbd3	BTB (POZ) domain containing 3 [Source:MGI Symbol;Acc:MGI:2385155]
ENSMUSG00000047454	1459.23	1567.47	1447.82	1431.56	1017.28	1015.67	1058.36	868.897	990.05	1476.52	0.573587	3.92695e-09	Gphn	gephyrin [Source:MGI Symbol;Acc:MGI:109602]
ENSMUSG00000005465	36.5361	26.6147	47.1773	36.2903	130.9	108.574	91.6576	96.0173	106.787	36.6546	-1.52926	3.94331e-09	Il27ra	interleukin 27 receptor, alpha [Source:MGI Symbol;Acc:MGI:1355318]
ENSMUSG00000021486	524.792	542.1	607.014	624.575	900.406	936.352	1170.78	919.869	981.852	574.62	-0.772842	3.96059e-09	Prelid1	PRELI domain containing 1 [Source:MGI Symbol;Acc:MGI:1913744]
ENSMUSG00000030557	7936.09	9334.77	9072.71	8373.51	5748.38	5914.58	5921.94	6503.09	6022	8679.27	0.527416	4.15099e-09	Mef2a	myocyte enhancer factor 2A [Source:MGI Symbol;Acc:MGI:99532]
ENSMUSG00000057969	1871.09	1896.65	1769.67	1858.45	1310.87	1429.94	1259.58	1266.01	1316.6	1848.97	0.488914	4.29374e-09	Sema3b	sema domain, immunoglobulin domain (Ig), short basic domain, secreted, (semaphorin) 3B [Source:MGI Symbol;Acc:MGI:107561]
ENSMUSG00000074578	498.22	794.24	714.998	561.545	289.85	247.949	338.703	325.985	300.622	642.251	1.09443	4.40929e-09	Zfas1	zinc finger, NFX1-type containing 1, antisense RNA 1 [Source:MGI Symbol;Acc:MGI:1916199]
ENSMUSG00000000126	136.18	148.482	154.112	150.891	271.15	279.52	243.465	337.838	282.993	147.417	-0.934898	4.53911e-09	Wnt9a	wingless-type MMTV integration site family, member 9A [Source:MGI Symbol;Acc:MGI:2446084]
ENSMUSG00000051373	406.326	501.478	515.805	489.919	796.62	810.838	702.47	791.846	775.444	478.382	-0.696389	4.58514e-09	Plpp7	phospholipid phosphatase 7 (inactive) [Source:MGI Symbol;Acc:MGI:2445183]
ENSMUSG00000031393	2653.85	2744.12	2861.04	2956.71	1767.15	2055.97	2053.7	1849.22	1931.51	2803.93	0.537064	4.75631e-09	Mecp2	methyl CpG binding protein 2 [Source:MGI Symbol;Acc:MGI:99918]
ENSMUSG00000047205	4173.98	3782.1	3540.39	3409.38	2562.84	2657.36	2472.61	2398.06	2522.72	3726.46	0.562249	4.75885e-09	Dusp18	dual specificity phosphatase 18 [Source:MGI Symbol;Acc:MGI:1922469]
ENSMUSG00000073599	214.788	204.513	166.693	223.472	359.04	331.111	387.397	369.844	361.848	202.367	-0.837867	4.77969e-09	Ecscr	endothelial cell surface expressed chemotaxis and apoptosis regulator [Source:MGI Symbol;Acc:MGI:1915795]
ENSMUSG00000031953	63.1079	72.8404	89.1126	76.4007	177.65	161.706	154.672	149.36	160.847	75.3654	-1.09131	4.77969e-09	Tmem170	transmembrane protein 170 [Source:MGI Symbol;Acc:MGI:106426]
ENSMUSG00000030410	3308.18	3200.77	3092.73	3102.82	2240.26	2229.23	2459	2070.89	2249.85	3176.13	0.49625	4.81747e-09	Dmwd	dystrophia myotonica-containing WD repeat motif [Source:MGI Symbol;Acc:MGI:94907]
ENSMUSG00000030956	579.042	491.672	577.66	438.349	1004.19	943.283	878.624	803.7	907.449	521.681	-0.79949	4.83055e-09	Fam53b	family with sequence similarity 53, member B [Source:MGI Symbol;Acc:MGI:1925188]
ENSMUSG00000037608	3463.18	5296.33	4933.69	4809.42	2405.76	2588.83	2474.04	2810.58	2569.8	4625.66	0.848101	5.24928e-09	Bclaf1	BCL2-associated transcription factor 1 [Source:MGI Symbol;Acc:MGI:1917580]
ENSMUSG00000021388	368.683	497.275	533.627	424.979	974.271	887.071	722.52	865.341	862.3	456.141	-0.919021	5.26944e-09	Aspn	asporin [Source:MGI Symbol;Acc:MGI:1913945]
ENSMUSG00000006369	1753.73	1430.19	1540.08	1168.93	2765.73	2737.44	2285	2957.57	2686.44	1473.23	-0.866568	5.29773e-09	Fbln1	fibulin 1 [Source:MGI Symbol;Acc:MGI:95487]
ENSMUSG00000034863	735.151	830.66	825.078	826.082	1222.05	1190.46	1086.29	1203.18	1175.49	804.243	-0.546848	5.3273e-09	Ano8	anoctamin 8 [Source:MGI Symbol;Acc:MGI:2687327]
ENSMUSG00000020814	369.79	388.015	365.886	316.108	656.37	666.843	544.217	564.25	607.92	359.95	-0.759303	5.40609e-09	Mxra7	matrix-remodelling associated 7 [Source:MGI Symbol;Acc:MGI:1914872]
ENSMUSG00000038151	26.5717	22.4124	18.8709	10.5051	96.3051	72.3825	70.1753	64.0115	75.7186	19.59	-1.97024	5.48736e-09	Prdm1	PR domain containing 1, with ZNF domain [Source:MGI Symbol;Acc:MGI:99655]
ENSMUSG00000022407	2702.57	3155.95	3004.67	3000.64	2215.95	2070.6	1924.81	2019.92	2057.82	2965.95	0.527316	5.51111e-09	Adsl	adenylosuccinate lyase [Source:MGI Symbol;Acc:MGI:103202]
ENSMUSG00000037754	217.002	190.506	160.403	132.746	513.315	391.174	452.559	309.389	416.609	175.164	-1.25525	5.52707e-09	Ppp1r16b	protein phosphatase 1, regulatory subunit 16B [Source:MGI Symbol;Acc:MGI:2151841]
ENSMUSG00000074916	116.251	93.852	92.2578	109.826	198.22	230.238	220.551	180.181	207.297	103.047	-1.01004	5.64487e-09	Chst14	carbohydrate (N-acetylgalactosamine 4-0) sulfotransferase 14 [Source:MGI Symbol;Acc:MGI:1919386]
ENSMUSG00000046415	35.429	39.2217	38.7902	36.2903	100.045	127.824	94.5219	84.1633	101.639	37.4328	-1.44948	5.64487e-09	B430212C06Rik	RIKEN cDNA B430212C06 gene [Source:MGI Symbol;Acc:MGI:2442134]
ENSMUSG00000028161	3359.11	3291.82	3286.68	3192.59	2460.92	2597.3	2466.16	2565.2	2522.4	3282.55	0.380034	5.66016e-09	Ppp3ca	protein phosphatase 3, catalytic subunit, alpha isoform [Source:MGI Symbol;Acc:MGI:107164]
ENSMUSG00000034832	746.223	575.719	529.434	508.064	1144.44	1175.83	1254.56	932.908	1126.94	589.86	-0.935715	5.66016e-09	Tet3	tet methylcytosine dioxygenase 3 [Source:MGI Symbol;Acc:MGI:2446229]
ENSMUSG00000032185	2249.74	2129.18	2196.36	2035.12	1541.82	1602.43	1627.64	1485.3	1564.3	2152.6	0.459286	5.66914e-09	Carm1	coactivator-associated arginine methyltransferase 1 [Source:MGI Symbol;Acc:MGI:1913208]
ENSMUSG00000031529	2910.71	3621.01	3637.89	3403.65	2282.34	2222.3	2268.53	2332.86	2276.51	3393.31	0.57589	5.69454e-09	Tnks	tankyrase, TRF1-interacting ankyrin-related ADP-ribose polymerase [Source:MGI Symbol;Acc:MGI:1341087]
ENSMUSG00000002020	73.0723	39.2217	62.903	50.6154	197.285	222.538	156.104	118.54	173.617	56.4531	-1.61783	5.82134e-09	Ltbp2	latent transforming growth factor beta binding protein 2 [Source:MGI Symbol;Acc:MGI:99502]
ENSMUSG00000025534	455.041	486.069	430.886	406.834	666.655	647.592	749.731	724.278	697.064	444.707	-0.651309	5.84953e-09	Gusb	glucuronidase, beta [Source:MGI Symbol;Acc:MGI:95872]
ENSMUSG00000061353	3924.87	2819.76	3267.81	2488.75	6865.71	7491.59	8121.01	4848.28	6831.65	3125.3	-1.12846	5.86543e-09	Cxcl12	chemokine (C-X-C motif) ligand 12 [Source:MGI Symbol;Acc:MGI:103556]
ENSMUSG00000055865	45.3934	47.6264	59.7579	32.4703	153.34	137.065	98.8183	143.433	133.164	46.312	-1.52429	5.87921e-09	Fam19a3	family with sequence similarity 19, member A3 [Source:MGI Symbol;Acc:MGI:3046463]
ENSMUSG00000061482	74.1794	61.6341	113.225	22.9202	12.155	2.31008	4.29645	2.3708	5.28308	67.9898	3.68872	6.00064e-09	Hist1h4d	histone cluster 1, H4d [Source:MGI Symbol;Acc:MGI:2448423]
ENSMUSG00000097195	302.253	291.361	285.16	260.717	141.185	144.765	182.599	155.287	155.959	284.873	0.864276	6.22639e-09	Snhg5	small nucleolar RNA host gene 5 [Source:MGI Symbol;Acc:MGI:1919905]
ENSMUSG00000001768	744.009	523.89	630.079	586.375	1072.45	1021.06	986.035	1103.61	1045.79	621.088	-0.749397	6.2384e-09	Rin2	Ras and Rab interactor 2 [Source:MGI Symbol;Acc:MGI:1921280]
ENSMUSG00000031791	19477.1	22923.7	22549.7	22196.3	16188.6	14718.3	13758.7	15155.3	14955.2	21786.7	0.542854	6.28112e-09	Tmem38a	transmembrane protein 38A [Source:MGI Symbol;Acc:MGI:1921416]
ENSMUSG00000033545	1360.69	1231.28	1287.42	1263.48	2025.21	2032.87	1967.77	1667.86	1923.43	1285.72	-0.581895	6.55623e-09	Znrf1	zinc and ring finger 1 [Source:MGI Symbol;Acc:MGI:2177308]
ENSMUSG00000102964	79.7152	58.8326	50.3224	49.6604	8.415	8.47029	15.7536	18.9664	12.9013	59.6327	2.2273	6.60786e-09	9430034N14Rik	RIKEN cDNA 9430034N14 gene [Source:MGI Symbol;Acc:MGI:2444791]
ENSMUSG00000020100	107.394	96.6535	119.516	109.826	205.7	205.597	270.676	205.074	221.762	108.347	-1.03298	6.62131e-09	Slc29a3	solute carrier family 29 (nucleoside transporters), member 3 [Source:MGI Symbol;Acc:MGI:1918529]
ENSMUSG00000064284	767.259	984.746	936.207	842.317	560.065	419.665	468.313	547.654	498.924	882.632	0.824825	6.65022e-09	Cdpf1	cysteine rich, DPF motif domain containing 1 [Source:MGI Symbol;Acc:MGI:1919605]
ENSMUSG00000026409	5694.1	5664.74	4378.05	6050.93	3439.87	2121.42	2754.02	2788.06	2775.84	5446.96	0.972742	6.78881e-09	Pfkfb2	6-phosphofructo-2-kinase/fructose-2,6-biphosphatase 2 [Source:MGI Symbol;Acc:MGI:107815]
ENSMUSG00000032515	1492.45	1717.35	1239.19	1126.91	724.625	641.432	746.15	463.491	643.925	1393.97	1.11142	6.9117e-09	Csrnp1	cysteine-serine-rich nuclear protein 1 [Source:MGI Symbol;Acc:MGI:2387989]
ENSMUSG00000020886	109.608	100.856	81.7739	94.5458	188.87	210.987	224.131	170.697	198.672	96.696	-1.04756	6.9117e-09	Dlg4	discs large MAGUK scaffold protein 4 [Source:MGI Symbol;Acc:MGI:1277959]
ENSMUSG00000058291	1389.48	1432.99	1402.74	1437.29	921.911	835.479	828.499	1065.67	912.89	1415.62	0.635891	7.03641e-09	Zfp68	zinc finger protein 68 [Source:MGI Symbol;Acc:MGI:1344427]
ENSMUSG00000036775	342.111	337.587	299.838	288.413	530.145	483.577	486.215	512.092	503.007	316.987	-0.668297	7.06254e-09	Decr2	2-4-dienoyl-Coenzyme A reductase 2, peroxisomal [Source:MGI Symbol;Acc:MGI:1347059]
ENSMUSG00000066278	497.113	500.077	536.773	481.324	307.615	276.44	347.296	314.131	311.37	503.822	0.693709	7.19786e-09	Vps37b	vacuolar protein sorting 37B [Source:MGI Symbol;Acc:MGI:1916724]
ENSMUSG00000030057	13697.7	16520.8	15960.6	15431	10273.8	9531.39	10869.3	11117.8	10448.1	15402.5	0.559969	7.33042e-09	Cnbp	cellular nucleic acid binding protein [Source:MGI Symbol;Acc:MGI:88431]
ENSMUSG00000040331	1824.59	1700.54	1688.95	1895.69	1071.51	1232.04	1149.3	1307.49	1190.09	1777.44	0.580175	7.4491e-09	Nsmce4a	NSE4 homolog A, SMC5-SMC6 complex component [Source:MGI Symbol;Acc:MGI:1915122]
ENSMUSG00000004070	1799.13	2075.95	1905.96	1875.64	1405.31	1304.43	1403.51	1326.46	1359.92	1914.17	0.492021	7.50837e-09	Hmox2	heme oxygenase 2 [Source:MGI Symbol;Acc:MGI:109373]
ENSMUSG00000039233	1028.55	1094.01	1034.75	1070.56	718.08	717.665	796.275	674.492	726.628	1056.97	0.537661	7.56276e-09	Tbce	tubulin-specific chaperone E [Source:MGI Symbol;Acc:MGI:1917680]
ENSMUSG00000037031	232.503	191.906	177.177	199.597	416.075	326.491	343.716	404.221	372.626	200.296	-0.892063	7.70111e-09	Tspan15	tetraspanin 15 [Source:MGI Symbol;Acc:MGI:1917673]
ENSMUSG00000040274	267.932	282.957	265.241	220.607	422.62	669.923	504.833	495.496	523.218	259.184	-1.01743	8.00616e-09	Cdk6	cyclin-dependent kinase 6 [Source:MGI Symbol;Acc:MGI:1277162]
ENSMUSG00000022102	29.8932	30.8171	30.4031	23.8752	77.605	100.874	207.662	103.13	122.317	28.7472	-2.0988	8.13081e-09	Dok2	docking protein 2 [Source:MGI Symbol;Acc:MGI:1332623]
ENSMUSG00000040659	3314.82	2851.98	2733.14	2632.96	1104.24	1181.22	1910.49	1113.09	1327.26	2883.22	1.11813	8.15628e-09	Efhd2	EF hand domain containing 2 [Source:MGI Symbol;Acc:MGI:106504]
ENSMUSG00000031570	261.289	278.754	264.193	271.222	400.18	413.504	455.424	419.631	422.185	268.865	-0.653546	8.25658e-09	Plpp5	phospholipid phosphatase 5 [Source:MGI Symbol;Acc:MGI:1919160]
ENSMUSG00000057666	139688	151191	154812	152330	114159	111984	98517.6	106123	107696	149505	0.473237	8.31526e-09	Gapdh	glyceraldehyde-3-phosphate dehydrogenase [Source:MGI Symbol;Acc:MGI:95640]
ENSMUSG00000038615	15253.3	17379.4	16987	16304.9	23002.9	22497.1	21955.6	21346.7	22200.6	16481.1	-0.42989	8.6202e-09	Nfe2l1	nuclear factor, erythroid derived 2,-like 1 [Source:MGI Symbol;Acc:MGI:99421]
ENSMUSG00000043683	13268.2	14020.4	13916.2	14596.3	10766.5	10867.4	10579.3	9919.41	10533.2	13950.3	0.405215	8.72122e-09	Fem1a	feminization 1 homolog a (C. elegans) [Source:MGI Symbol;Acc:MGI:1335089]
ENSMUSG00000042428	46.5005	42.0233	68.145	38.2003	130.9	115.504	129.61	175.439	137.863	48.7173	-1.49165	8.8039e-09	Mgat3	mannoside acetylglucosaminyltransferase 3 [Source:MGI Symbol;Acc:MGI:104532]
ENSMUSG00000040848	1111.58	979.142	1112.34	1024.72	1464.21	1490	1467.95	1597.92	1505.02	1056.95	-0.50802	9.23055e-09	Sft2d2	SFT2 domain containing 2 [Source:MGI Symbol;Acc:MGI:1917362]
ENSMUSG00000100550	88.5724	106.459	91.2094	90.7258	190.74	194.817	160.401	205.074	187.758	94.2417	-0.995846	9.23055e-09	2310039L15Rik	RIKEN cDNA 2310039L15 gene [Source:MGI Symbol;Acc:MGI:1916879]
ENSMUSG00000052906	752.866	832.061	790.481	758.277	494.615	449.696	535.624	552.396	508.083	783.421	0.625651	9.32381e-09	Ubxn8	UBX domain protein 8 [Source:MGI Symbol;Acc:MGI:1337129]
ENSMUSG00000029028	1644.13	1704.74	1457.25	1570.99	1131.35	1110.38	1114.21	983.88	1084.96	1594.28	0.553024	9.3608e-09	Lrrc47	leucine rich repeat containing 47 [Source:MGI Symbol;Acc:MGI:1920196]
ENSMUSG00000006542	35.429	51.8287	53.4676	29.6053	129.03	139.375	107.411	103.13	119.736	42.5826	-1.50603	9.3608e-09	Prkag3	protein kinase, AMP-activated, gamma 3 non-catalytic subunit [Source:MGI Symbol;Acc:MGI:1891343]
ENSMUSG00000064120	928.904	837.664	867.013	833.722	633.93	588.3	584.317	546.469	588.254	866.826	0.558311	9.52377e-09	Mocs1	molybdenum cofactor synthesis 1 [Source:MGI Symbol;Acc:MGI:1928904]
ENSMUSG00000044349	107.394	61.6341	75.4836	106.006	11.22	10.7804	21.4822	32.0058	18.8721	87.6295	2.24632	9.7578e-09	Snhg11	small nucleolar RNA host gene 11 [Source:MGI Symbol;Acc:MGI:2441845]
ENSMUSG00000028756	31284.9	35707.2	33205.5	33561.9	25551.7	24070.3	25160	25592.7	25093.7	33439.8	0.414232	9.7578e-09	Pink1	PTEN induced putative kinase 1 [Source:MGI Symbol;Acc:MGI:1916193]
ENSMUSG00000075324	153.895	135.875	179.274	160.441	277.695	341.892	295.739	265.529	295.214	157.371	-0.90598	9.7578e-09	Fign	fidgetin [Source:MGI Symbol;Acc:MGI:1890647]
ENSMUSG00000024790	136.18	109.261	93.3062	147.071	227.205	249.489	269.96	265.529	253.046	121.455	-1.05442	9.79141e-09	Sac3d1	SAC3 domain containing 1 [Source:MGI Symbol;Acc:MGI:1913656]
ENSMUSG00000033306	794.938	967.936	875.401	767.827	1345.47	1269.77	1548.87	1312.24	1369.09	851.525	-0.687589	9.7994e-09	Lpp	LIM domain containing preferred translocation partner in lipoma [Source:MGI Symbol;Acc:MGI:2441849]
ENSMUSG00000032336	2225.38	2133.38	2256.12	2082.87	2796.59	2927.64	2844.97	2875.78	2861.24	2174.44	-0.395999	9.88774e-09	Nptn	neuroplastin [Source:MGI Symbol;Acc:MGI:108077]
ENSMUSG00000045968	201.502	163.891	126.854	155.666	79.475	48.5117	65.1628	45.0451	59.5487	161.978	1.43763	9.96856e-09	Teddm2	transmembrane epididymal family member 2 [Source:MGI Symbol;Acc:MGI:1923273]
ENSMUSG00000024104	1633.05	1458.21	1515.96	1655.03	1056.55	1152.73	1133.55	1075.16	1104.5	1565.56	0.503269	1.01737e-08	Washc2	WASH complex subunit 2` [Source:MGI Symbol;Acc:MGI:106463]
ENSMUSG00000079293	17.7145	9.80543	15.7258	15.2801	54.23	63.1422	189.76	82.9779	97.5275	14.6315	-2.72999	1.0329e-08	Clec7a	C-type lectin domain family 7, member a [Source:MGI Symbol;Acc:MGI:1861431]
ENSMUSG00000038521	611.15	521.089	579.756	416.384	953.701	954.833	940.206	1279.04	1031.95	532.095	-0.954814	1.04301e-08	C1s1	complement component 1, s subcomponent 1 [Source:MGI Symbol;Acc:MGI:1355312]
ENSMUSG00000025380	23.2503	57.4318	28.3064	39.1553	3.74	3.08011	4.29645	5.92699	4.26089	37.0359	3.14166	1.04604e-08	Fscn2	fascin actin-bundling protein 2 [Source:MGI Symbol;Acc:MGI:2443337]
ENSMUSG00000025085	33488.1	33510.8	31038.5	35941.7	22692.5	22495.6	22550.6	17489.4	21307	33494.8	0.652508	1.04604e-08	Ablim1	actin-binding LIM protein 1 [Source:MGI Symbol;Acc:MGI:1194500]
ENSMUSG00000115406	27.6789	113.463	67.0966	34.3803	9.35001	5.39019	2.8643	5.92699	5.88287	60.6547	3.38171	1.04656e-08	Gm49300	predicted gene, 49300 [Source:MGI Symbol;Acc:MGI:6118795]
ENSMUSG00000070509	646.579	494.474	569.272	497.559	825.605	979.474	910.847	956.616	918.136	551.971	-0.733331	1.05896e-08	Rgma	repulsive guidance molecule family member A [Source:MGI Symbol;Acc:MGI:2679262]
ENSMUSG00000031740	1276.55	944.123	917.336	794.567	1932.65	1932.77	1673.47	1776.91	1828.95	983.144	-0.895915	1.06107e-08	Mmp2	matrix metallopeptidase 2 [Source:MGI Symbol;Acc:MGI:97009]
ENSMUSG00000096054	5184.81	5689.95	5380.31	5343.27	4118.68	3677.65	4052.98	4076.58	3981.47	5399.58	0.439577	1.06454e-08	Syne1	spectrin repeat containing, nuclear envelope 1 [Source:MGI Symbol;Acc:MGI:1927152]
ENSMUSG00000029722	1550.02	1072.99	1258.06	1169.89	646.085	670.693	768.348	508.536	648.416	1262.74	0.959581	1.06485e-08	Agfg2	ArfGAP with FG repeats 2 [Source:MGI Symbol;Acc:MGI:2443267]
ENSMUSG00000037225	377.54	399.221	363.789	411.609	569.415	686.864	875.044	724.278	713.9	388.04	-0.880731	1.07536e-08	Fgf2	fibroblast growth factor 2 [Source:MGI Symbol;Acc:MGI:95516]
ENSMUSG00000033427	96.3225	127.471	92.2578	120.331	27.115	37.7313	47.2609	45.0451	39.2881	109.095	1.46936	1.11727e-08	Upb1	ureidopropionase, beta [Source:MGI Symbol;Acc:MGI:2143535]
ENSMUSG00000022685	797.152	675.174	722.336	725.806	427.295	468.946	484.783	513.277	473.575	730.117	0.626769	1.13163e-08	Parn	poly(A)-specific ribonuclease (deadenylation nuclease) [Source:MGI Symbol;Acc:MGI:1921358]
ENSMUSG00000027111	1166.94	790.038	847.094	734.401	2084.12	1695.6	1567.49	1650.07	1749.32	884.619	-0.983505	1.13395e-08	Itga6	integrin alpha 6 [Source:MGI Symbol;Acc:MGI:96605]
ENSMUSG00000035783	1142.58	881.088	995.965	1103.99	3024.73	2968.45	1896.88	1658.37	2387.11	1030.91	-1.21116	1.13676e-08	Acta2	actin, alpha 2, smooth muscle, aorta [Source:MGI Symbol;Acc:MGI:87909]
ENSMUSG00000057835	164.966	170.895	198.145	182.407	92.5651	91.6332	78.7682	103.13	91.524	179.103	0.979816	1.1466e-08	Zfp119a	zinc finger protein 119a [Source:MGI Symbol;Acc:MGI:1345189]
ENSMUSG00000068250	415.183	467.859	531.531	501.379	276.76	273.359	305.764	301.091	289.244	478.988	0.729424	1.15167e-08	Amn1	antagonist of mitotic exit network 1 [Source:MGI Symbol;Acc:MGI:2442933]
ENSMUSG00000046434	8607.03	8603.57	7448.77	9555.81	5479.1	5726.69	6064.44	5143.44	5603.42	8553.79	0.610004	1.16056e-08	Hnrnpa1	heterogeneous nuclear ribonucleoprotein A1 [Source:MGI Symbol;Acc:MGI:104820]
ENSMUSG00000116138	2257.49	2398.13	2235.15	2498.3	1769.02	1710.23	1656.28	1746.09	1720.41	2347.27	0.448798	1.16056e-08	C030006K11Rik	RIKEN cDNA C030006K11 gene [Source:MGI Symbol;Acc:MGI:1925941]
ENSMUSG00000054978	38.7504	12.607	27.258	29.6053	82.28	103.184	103.115	176.624	116.301	27.0552	-2.08114	1.16632e-08	Kbtbd13	kelch repeat and BTB (POZ) domain containing 13 [Source:MGI Symbol;Acc:MGI:1921742]
ENSMUSG00000021939	11133.6	11074.5	11140.1	10702.8	15631.3	14755.3	16842.1	14044.6	15318.3	11012.7	-0.476266	1.17677e-08	Ctsb	cathepsin B [Source:MGI Symbol;Acc:MGI:88561]
ENSMUSG00000042436	161.645	51.8287	148.871	94.5458	570.35	599.851	257.071	437.412	466.171	114.222	-2.02434	1.18901e-08	Mfap4	microfibrillar-associated protein 4 [Source:MGI Symbol;Acc:MGI:1342276]
ENSMUSG00000015094	549.149	413.229	460.241	460.314	824.67	730.755	789.831	718.351	765.902	470.733	-0.701072	1.25348e-08	Npdc1	neural proliferation, differentiation and control 1 [Source:MGI Symbol;Acc:MGI:1099802]
ENSMUSG00000001910	1155.87	1110.82	1150.08	1066.74	1612.88	1593.96	1632.65	1441.44	1570.23	1120.88	-0.487777	1.26476e-08	Nacc1	nucleus accumbens associated 1, BEN and BTB (POZ) domain containing [Source:MGI Symbol;Acc:MGI:1914080]
ENSMUSG00000021639	688.651	806.847	808.304	802.207	535.755	495.897	527.747	513.277	518.169	776.502	0.583446	1.27036e-08	Gtf2h2	general transcription factor II H, polypeptide 2 [Source:MGI Symbol;Acc:MGI:1345669]
ENSMUSG00000044505	57.5721	44.8248	38.7902	42.9754	10.285	10.0103	7.87682	14.2248	10.5992	46.0406	2.15135	1.27989e-08	Lingo4	leucine rich repeat and Ig domain containing 4 [Source:MGI Symbol;Acc:MGI:2444651]
ENSMUSG00000031790	1656.3	2178.21	1925.88	1599.64	3835.37	3738.48	2638.74	3545.53	3439.53	1840.01	-0.902943	1.31321e-08	Mmp15	matrix metallopeptidase 15 [Source:MGI Symbol;Acc:MGI:109320]
ENSMUSG00000032243	45.3934	37.821	48.2257	31.5153	123.42	116.274	90.9415	99.5734	107.552	40.7388	-1.40128	1.31448e-08	Itga11	integrin alpha 11 [Source:MGI Symbol;Acc:MGI:2442114]
ENSMUSG00000021868	3672.44	4182.72	3957.65	3361.63	6021.4	6288.81	5164.33	5827.42	5825.49	3793.61	-0.619171	1.35375e-08	Ppif	peptidylprolyl isomerase F (cyclophilin F) [Source:MGI Symbol;Acc:MGI:2145814]
ENSMUSG00000116946	429.576	233.93	263.144	293.188	123.42	126.284	142.499	93.6465	121.462	304.959	1.32318	1.37453e-08	AC130815.2	novel transcript
ENSMUSG00000070705	776.116	609.338	772.659	788.837	449.735	423.515	419.62	494.311	446.795	736.737	0.726759	1.37453e-08	Eid2b	EP300 interacting inhibitor of differentiation 2B [Source:MGI Symbol;Acc:MGI:1924095]
ENSMUSG00000034110	45.3934	43.4241	42.9837	45.8404	103.785	93.9433	103.115	118.54	104.846	44.4104	-1.23183	1.41469e-08	Kctd7	potassium channel tetramerisation domain containing 7 [Source:MGI Symbol;Acc:MGI:2442265]
ENSMUSG00000040631	304.468	337.587	291.451	285.548	474.98	456.626	464.017	502.609	474.558	304.763	-0.641313	1.4511e-08	Dok4	docking protein 4 [Source:MGI Symbol;Acc:MGI:2148865]
ENSMUSG00000106858	25.4646	36.4202	37.7418	51.5705	7.48	2.31008	2.8643	7.11239	4.94169	37.7993	3.01089	1.48117e-08	Gm43844	predicted gene 43844 [Source:MGI Symbol;Acc:MGI:5663981]
ENSMUSG00000036913	310.004	301.167	241.128	202.462	119.68	97.0234	101.683	144.619	115.751	263.69	1.19393	1.49841e-08	Trim67	tripartite motif-containing 67 [Source:MGI Symbol;Acc:MGI:3045323]
ENSMUSG00000000346	9727.47	8794.07	8744.57	8615.13	6580.53	6801.65	6873.6	6381	6659.2	8970.31	0.429551	1.50351e-08	Dazap2	DAZ associated protein 2 [Source:MGI Symbol;Acc:MGI:1344344]
ENSMUSG00000090795	64.215	49.0272	56.6127	48.7054	11.22	16.9406	13.6054	3.55619	11.3306	54.6401	2.2161	1.52831e-08	Gm7346	predicted gene 7346 [Source:MGI Symbol;Acc:MGI:3645982]
ENSMUSG00000051435	115.144	86.8481	48.2257	54.4355	7.48	13.8605	15.7536	21.3372	14.6078	76.1634	2.39182	1.54271e-08	Fhad1	forkhead-associated (FHA) phosphopeptide binding domain 1 [Source:MGI Symbol;Acc:MGI:1920323]
ENSMUSG00000023191	328.825	267.548	321.854	255.942	471.24	477.417	491.944	532.244	493.211	293.542	-0.746437	1.54416e-08	P3h3	prolyl 3-hydroxylase 3 [Source:MGI Symbol;Acc:MGI:1315208]
ENSMUSG00000055200	76.3937	65.8365	58.7095	63.0306	116.875	154.005	167.562	164.77	150.803	65.9926	-1.19459	1.56561e-08	Sertad3	SERTA domain containing 3 [Source:MGI Symbol;Acc:MGI:2180697]
ENSMUSG00000056917	697.508	563.112	548.305	476.549	1410.92	1177.37	1217.33	858.228	1165.96	571.368	-1.03047	1.73641e-08	Sipa1	signal-induced proliferation associated gene 1 [Source:MGI Symbol;Acc:MGI:107576]
ENSMUSG00000033595	639.936	379.61	401.531	583.51	215.985	160.936	67.311	111.427	138.915	501.147	1.85289	1.7793e-08	Lgi3	leucine-rich repeat LGI family, member 3 [Source:MGI Symbol;Acc:MGI:2182619]
ENSMUSG00000021130	99.644	123.268	113.225	73.5356	210.375	254.879	227.712	196.776	222.435	102.418	-1.13138	1.78117e-08	Galnt16	polypeptide N-acetylgalactosaminyltransferase 16 [Source:MGI Symbol;Acc:MGI:1917754]
ENSMUSG00000026471	832.581	785.835	751.691	785.017	452.54	485.887	431.077	579.66	487.291	788.781	0.698936	1.80966e-08	Mr1	major histocompatibility complex, class I-related [Source:MGI Symbol;Acc:MGI:1195463]
ENSMUSG00000030528	156.109	159.688	120.564	146.116	71.06	72.3825	63.0146	71.1239	69.3953	145.619	1.06909	1.82122e-08	Blm	Bloom syndrome, RecQ like helicase [Source:MGI Symbol;Acc:MGI:1328362]
ENSMUSG00000038526	6595.33	6509.41	6395.14	8189.2	3935.42	4852.71	3597.56	3508.78	3973.62	6922.27	0.800674	1.91031e-08	Car14	carbonic anhydrase 14 [Source:MGI Symbol;Acc:MGI:1344341]
ENSMUSG00000067586	428.469	254.941	263.144	266.447	703.12	635.272	762.62	554.766	663.945	303.251	-1.13102	1.92649e-08	S1pr3	sphingosine-1-phosphate receptor 3 [Source:MGI Symbol;Acc:MGI:1339365]
ENSMUSG00000014773	52.0363	44.8248	74.4353	43.9304	175.78	133.985	133.906	122.096	141.442	53.8067	-1.39052	1.95543e-08	Dll1	delta like canonical Notch ligand 1 [Source:MGI Symbol;Acc:MGI:104659]
ENSMUSG00000027276	375.326	326.381	285.16	300.828	641.41	594.461	706.05	477.715	604.909	321.924	-0.913541	1.97753e-08	Jag1	jagged 1 [Source:MGI Symbol;Acc:MGI:1095416]
ENSMUSG00000037112	698.615	759.221	738.062	792.657	446.93	411.964	542.069	440.968	460.483	747.139	0.696407	1.99408e-08	Sik2	salt inducible kinase 2 [Source:MGI Symbol;Acc:MGI:2445031]
ENSMUSG00000024750	6871.01	9082.63	8637.63	8710.63	5613.74	4711.02	4721.8	5500.25	5136.7	8325.48	0.696905	2.00714e-08	Zfand5	zinc finger, AN1-type domain 5 [Source:MGI Symbol;Acc:MGI:1278334]
ENSMUSG00000030798	48.7148	29.4163	39.8386	35.3353	94.4351	113.194	167.562	99.5734	118.691	38.3263	-1.63104	2.0814e-08	Cd37	CD37 antigen [Source:MGI Symbol;Acc:MGI:88330]
ENSMUSG00000022466	890.153	900.699	950.884	923.493	615.23	647.592	691.012	612.851	641.672	916.307	0.512072	2.08574e-08	Rpap3	RNA polymerase II associated protein 3 [Source:MGI Symbol;Acc:MGI:1277218]
ENSMUSG00000041445	1204.59	827.859	919.433	773.557	1810.16	1778.76	1640.53	1564.73	1698.54	931.358	-0.867006	2.09271e-08	Mmrn2	multimerin 2 [Source:MGI Symbol;Acc:MGI:2385618]
ENSMUSG00000003269	1472.52	1578.67	1509.67	1647.39	1125.74	1075.73	1091.3	926.981	1054.94	1552.06	0.555403	2.12889e-08	Cyth2	cytohesin 2 [Source:MGI Symbol;Acc:MGI:1334255]
ENSMUSG00000057143	292.289	294.163	330.241	286.503	565.675	433.525	492.66	539.356	507.804	300.799	-0.752724	2.13949e-08	Trim12c	tripartite motif-containing 12C [Source:MGI Symbol;Acc:MGI:4821183]
ENSMUSG00000037458	3036.93	5121.24	3547.73	3992.89	1739.1	1914.29	2201.21	2179.95	2008.64	3924.7	0.966069	2.19055e-08	Azin1	antizyme inhibitor 1 [Source:MGI Symbol;Acc:MGI:1859169]
ENSMUSG00000015839	2911.82	3321.24	3131.52	3251.8	2204.73	2260.03	2156.1	1812.47	2108.33	3154.1	0.579967	2.20084e-08	Nfe2l2	nuclear factor, erythroid derived 2, like 2 [Source:MGI Symbol;Acc:MGI:108420]
ENSMUSG00000038506	1313.09	1794.39	1745.56	1513.69	2624.55	2469.48	2459.72	2617.36	2542.77	1591.68	-0.67635	2.20928e-08	Dcun1d2	DCN1, defective in cullin neddylation 1, domain containing 2 (S. cerevisiae) [Source:MGI Symbol;Acc:MGI:2142792]
ENSMUSG00000057421	3277.18	2927.62	2985.8	2904.18	2176.68	2111.41	2249.91	1895.45	2108.36	3023.7	0.519258	2.2997e-08	Las1l	LAS1-like (S. cerevisiae) [Source:MGI Symbol;Acc:MGI:1923380]
ENSMUSG00000041671	379.754	371.206	385.805	366.723	201.96	221.768	249.91	248.934	230.643	375.872	0.70529	2.31983e-08	Pyroxd1	pyridine nucleotide-disulphide oxidoreductase domain 1 [Source:MGI Symbol;Acc:MGI:2676395]
ENSMUSG00000030630	1531.2	1008.56	1064.11	1660.76	522.665	675.313	698.173	526.317	605.617	1316.16	1.11913	2.36262e-08	Fah	fumarylacetoacetate hydrolase [Source:MGI Symbol;Acc:MGI:95482]
ENSMUSG00000033161	49786.6	56448.5	42463.7	56555.6	32273.4	32696.1	33950.5	33703.2	33155.8	51313.6	0.630063	2.38703e-08	Atp1a1	ATPase, Na+/K+ transporting, alpha 1 polypeptide [Source:MGI Symbol;Acc:MGI:88105]
ENSMUSG00000073608	94.1082	120.467	131.048	78.3107	253.385	274.9	214.106	208.63	237.755	105.983	-1.1729	2.40513e-08	Gal3st2c	galactose-3-O-sulfotransferase 2C [Source:MGI Symbol;Acc:MGI:3646771]
ENSMUSG00000001128	152.787	88.2489	137.338	136.566	328.185	267.199	554.242	315.316	366.236	128.735	-1.50555	2.48299e-08	Cfp	complement factor properdin [Source:MGI Symbol;Acc:MGI:97545]
ENSMUSG00000110185	231.396	211.517	230.644	218.697	417.01	386.553	408.163	316.501	382.057	223.064	-0.778867	2.48423e-08	Igip	IgA inducing protein [Source:MGI Symbol;Acc:MGI:1924271]
ENSMUSG00000046275	64.215	81.245	67.0966	63.9856	151.47	162.476	166.845	119.725	150.129	69.1355	-1.13422	2.49809e-08	Tusc5	tumor suppressor candidate 5 [Source:MGI Symbol;Acc:MGI:3029307]
ENSMUSG00000018425	1184.66	1222.88	1051.53	1170.84	792.88	793.898	811.313	853.487	812.894	1157.48	0.509976	2.49957e-08	Dhx40	DEAH (Asp-Glu-Ala-His) box polypeptide 40 [Source:MGI Symbol;Acc:MGI:1914737]
ENSMUSG00000068015	1734.91	2127.78	1457.25	1371.39	826.54	930.962	956.676	691.087	851.317	1672.83	0.971989	2.52408e-08	Lrch1	leucine-rich repeats and calponin homology (CH) domain containing 1 [Source:MGI Symbol;Acc:MGI:2443390]
ENSMUSG00000033389	1683.98	1884.04	1835.72	1690.36	1306.2	1195.85	1266.02	1091.75	1214.95	1773.53	0.543907	2.53913e-08	Arhgap44	Rho GTPase activating protein 44 [Source:MGI Symbol;Acc:MGI:2144423]
ENSMUSG00000042115	171.609	229.727	275.725	205.327	621.775	430.445	433.941	827.408	578.392	220.597	-1.38825	2.61427e-08	Klhdc8a	kelch domain containing 8A [Source:MGI Symbol;Acc:MGI:2442630]
ENSMUSG00000092397	788.295	893.695	926.771	827.992	1613.81	1376.04	1188.68	1641.78	1455.08	859.188	-0.759021	2.65454e-08	C130080G10Rik	RIKEN cDNA C130080G10 gene [Source:MGI Symbol;Acc:MGI:4844008]
ENSMUSG00000027864	1351.84	1157.04	1241.29	1029.5	1813.9	2151.45	1836.73	2432.44	2058.63	1194.92	-0.784278	2.66828e-08	Ptgfrn	prostaglandin F2 receptor negative regulator [Source:MGI Symbol;Acc:MGI:1277114]
ENSMUSG00000034041	97.4297	79.8442	97.4997	87.8608	158.015	170.946	188.328	200.332	179.405	90.6586	-0.978161	2.7054e-08	Lyl1	lymphoblastomic leukemia 1 [Source:MGI Symbol;Acc:MGI:96891]
ENSMUSG00000036894	52.0363	40.6225	54.516	50.6154	92.5651	123.974	136.77	133.95	121.815	49.4476	-1.29324	2.79742e-08	Rap2b	RAP2B, member of RAS oncogene family [Source:MGI Symbol;Acc:MGI:1921262]
ENSMUSG00000004364	5657.57	6838.59	6524.09	6200.87	4514.18	4530.84	4469.02	4630.17	4536.05	6305.28	0.474994	2.83128e-08	Cul3	cullin 3 [Source:MGI Symbol;Acc:MGI:1347360]
ENSMUSG00000029169	3065.71	3773.69	3416.68	3550.72	2312.26	2212.29	2376.65	2540.31	2360.38	3451.7	0.548515	2.86472e-08	Dhx15	DEAH (Asp-Glu-Ala-His) box polypeptide 15 [Source:MGI Symbol;Acc:MGI:1099786]
ENSMUSG00000087406	108.501	61.6341	111.129	63.0306	28.985	23.8708	25.7787	20.1518	24.6966	86.0737	1.79768	2.89199e-08	E130215H24Rik	RIKEN cDNA E130215H24 gene [Source:MGI Symbol;Acc:MGI:1926091]
ENSMUSG00000021898	4968.91	5523.26	5307.97	5210.53	3965.34	3843.2	3475.11	3981.75	3816.35	5252.67	0.461158	2.95856e-08	Asb14	ankyrin repeat and SOCS box-containing 14 [Source:MGI Symbol;Acc:MGI:2655107]
ENSMUSG00000078619	558.006	423.034	443.466	447.899	872.356	920.952	852.129	670.935	829.093	468.102	-0.825775	3.05562e-08	Smarcd2	SWI/SNF related, matrix associated, actin dependent regulator of chromatin, subfamily d, member 2 [Source:MGI Symbol;Acc:MGI:1933621]
ENSMUSG00000081822	228.074	180.7	218.064	276.952	19.635	37.7313	52.2735	97.2027	51.7106	225.948	2.14279	3.05824e-08	Gm15626	predicted gene 15626 [Source:MGI Symbol;Acc:MGI:3783070]
ENSMUSG00000021411	917.832	750.816	642.659	690.471	443.19	437.375	320.086	388.811	397.365	750.445	0.917676	3.06334e-08	Pxdc1	PX domain containing 1 [Source:MGI Symbol;Acc:MGI:1914145]
ENSMUSG00000104824	29.8932	50.4279	58.7095	24.8302	5.61	3.08011	0	5.92699	3.65428	40.9652	3.57661	3.1167e-08	Gm21663	predicted gene, 21663 [Source:MGI Symbol;Acc:MGI:5435018]
ENSMUSG00000021057	23.2503	12.607	20.9677	14.3251	66.385	87.783	47.2609	91.2757	73.1762	17.7875	-2.02584	3.1167e-08	Akap5	A kinase (PRKA) anchor protein 5 [Source:MGI Symbol;Acc:MGI:2685104]
ENSMUSG00000018169	202.609	169.494	161.451	153.756	374	334.192	307.196	273.827	322.304	171.828	-0.910695	3.14905e-08	Mfng	MFNG O-fucosylpeptide 3-beta-N-acetylglucosaminyltransferase [Source:MGI Symbol;Acc:MGI:1095404]
ENSMUSG00000043557	171.609	165.292	192.903	111.736	474.045	478.957	257.071	499.053	427.281	160.385	-1.4136	3.14905e-08	Mdga1	MAM domain containing glycosylphosphatidylinositol anchor 1 [Source:MGI Symbol;Acc:MGI:1922012]
ENSMUSG00000008301	788.295	843.267	828.223	854.732	589.05	570.59	614.392	587.958	590.497	828.629	0.488365	3.15687e-08	Phax	phosphorylated adaptor for RNA export [Source:MGI Symbol;Acc:MGI:1891839]
ENSMUSG00000032965	416.291	379.61	460.241	408.744	224.4	247.949	270.676	271.456	253.62	416.221	0.716994	3.21778e-08	Ift57	intraflagellar transport 57 [Source:MGI Symbol;Acc:MGI:1921166]
ENSMUSG00000017386	83.0367	84.0466	106.935	88.8158	158.95	181.726	197.637	178.995	179.327	90.7085	-0.981988	3.41706e-08	Traf4	TNF receptor associated factor 4 [Source:MGI Symbol;Acc:MGI:1202880]
ENSMUSG00000030256	346.54	289.961	331.289	327.568	471.24	799.288	625.85	650.784	636.79	323.839	-0.974918	3.49022e-08	Bhlhe41	basic helix-loop-helix family, member e41 [Source:MGI Symbol;Acc:MGI:1930704]
ENSMUSG00000017446	257.967	184.902	179.274	149.936	415.14	478.187	350.161	391.181	408.667	193.02	-1.08394	3.54483e-08	C1qtnf1	C1q and tumor necrosis factor related protein 1 [Source:MGI Symbol;Acc:MGI:1919254]
ENSMUSG00000031543	11977.2	13130.9	12750.4	13828.5	9111.58	7971.32	7319	9417.99	8454.97	12921.8	0.612234	3.56878e-08	Ank1	ankyrin 1, erythroid [Source:MGI Symbol;Acc:MGI:88024]
ENSMUSG00000035896	55.3578	88.2489	76.532	46.7954	16.83	15.4005	22.1983	16.5956	17.7561	66.7335	1.89221	3.59196e-08	Rnase1	ribonuclease, RNase A family, 1 (pancreatic) [Source:MGI Symbol;Acc:MGI:97919]
ENSMUSG00000003380	6841.11	8406.06	7885.94	8542.55	5164.94	5014.41	5325.45	5782.37	5321.79	7918.92	0.573597	3.66651e-08	Rabac1	Rab acceptor 1 (prenylated) [Source:MGI Symbol;Acc:MGI:1201692]
ENSMUSG00000041696	253.539	193.307	180.322	179.542	427.295	448.156	407.447	315.316	399.553	201.677	-0.989907	3.71062e-08	Rasl12	RAS-like, family 12 [Source:MGI Symbol;Acc:MGI:1918034]
ENSMUSG00000016541	2998.18	3259.61	2977.41	3167.76	2157.05	2201.51	2439.67	2086.3	2221.13	3100.74	0.480126	3.71603e-08	Atxn10	ataxin 10 [Source:MGI Symbol;Acc:MGI:1859293]
ENSMUSG00000029864	2896.32	3566.38	3313.94	3432.3	2167.33	2236.16	1880.41	2335.23	2154.78	3302.23	0.616415	3.71961e-08	Gstk1	glutathione S-transferase kappa 1 [Source:MGI Symbol;Acc:MGI:1923513]
ENSMUSG00000043131	772.795	962.333	905.804	855.687	1395.96	1222.8	1602.58	1395.21	1404.14	874.155	-0.684932	3.81026e-08	Mob1a	MOB kinase activator 1A [Source:MGI Symbol;Acc:MGI:2442631]
ENSMUSG00000025260	4754.13	6021.94	5661.27	5646.96	3631.54	3536.73	3605.44	4045.76	3704.87	5521.07	0.575766	3.81256e-08	Hsd17b10	hydroxysteroid (17-beta) dehydrogenase 10 [Source:MGI Symbol;Acc:MGI:1333871]
ENSMUSG00000044475	996.44	973.539	1036.85	984.614	729.3	683.014	696.741	762.211	717.817	997.861	0.47804	3.88071e-08	Ascc1	activating signal cointegrator 1 complex subunit 1 [Source:MGI Symbol;Acc:MGI:1916340]
ENSMUSG00000105168	38.7504	14.0078	25.1612	26.7402	94.4351	146.305	75.9039	87.7195	101.091	26.1649	-1.9374	3.93936e-08	Gm30735	predicted gene, 30735 [Source:MGI Symbol;Acc:MGI:5589894]
ENSMUSG00000034881	16.6073	25.214	29.3547	19.1002	77.605	66.2223	61.5824	75.8655	70.3188	22.5691	-1.64081	4.06869e-08	Tbxa2r	thromboxane A2 receptor [Source:MGI Symbol;Acc:MGI:98496]
ENSMUSG00000027597	1338.55	1683.73	1307.33	1628.29	822.8	892.461	1003.94	925.796	911.249	1489.48	0.707884	4.12234e-08	Ahcy	S-adenosylhomocysteine hydrolase [Source:MGI Symbol;Acc:MGI:87968]
ENSMUSG00000027199	28.786	28.0155	30.4031	20.0552	61.71	80.8528	84.4968	82.9779	77.5094	26.815	-1.54023	4.12936e-08	Gatm	glycine amidinotransferase (L-arginine:glycine amidinotransferase) [Source:MGI Symbol;Acc:MGI:1914342]
ENSMUSG00000066415	765.045	704.59	744.353	838.497	1050.94	1113.46	1129.25	1235.18	1132.21	763.121	-0.566288	4.15149e-08	Msl2	MSL complex subunit 2 [Source:MGI Symbol;Acc:MGI:1925103]
ENSMUSG00000061119	239.146	214.319	211.774	238.752	335.665	364.223	424.632	405.406	382.482	225.997	-0.757405	4.17346e-08	Prcp	prolylcarboxypeptidase (angiotensinase C) [Source:MGI Symbol;Acc:MGI:1919711]
ENSMUSG00000020288	367.576	449.649	383.709	416.384	608.685	609.861	653.776	590.328	615.663	404.329	-0.610461	4.19223e-08	Ahsa2	AHA1, activator of heat shock protein ATPase 2 [Source:MGI Symbol;Acc:MGI:1916133]
ENSMUSG00000039234	957.69	848.87	1053.63	919.673	1322.09	1469.98	1628.35	1414.18	1458.65	944.965	-0.626013	4.24822e-08	Sec24d	Sec24 related gene family, member D (S. cerevisiae) [Source:MGI Symbol;Acc:MGI:1916858]
ENSMUSG00000021178	5148.27	6169.02	5638.21	6211.37	3911.11	3622.98	4287.14	3921.3	3935.63	5791.72	0.557244	4.32392e-08	Psmc1	protease (prosome, macropain) 26S subunit, ATPase 1 [Source:MGI Symbol;Acc:MGI:106054]
ENSMUSG00000034387	40.9648	54.6303	50.3224	42.0204	209.44	127.824	176.871	87.7195	150.464	46.9845	-1.6884	4.47479e-08	Ssu2	ssu-2 homolog (C. elegans) [Source:MGI Symbol;Acc:MGI:2443733]
ENSMUSG00000026234	10695.1	12286.2	11084.6	11227.1	7369.67	8233.9	8696.01	7918.46	8054.51	11323.2	0.491108	4.50081e-08	Ncl	nucleolin [Source:MGI Symbol;Acc:MGI:97286]
ENSMUSG00000041328	1321.94	1545.06	1536.93	1577.67	1040.66	1071.88	1063.37	1007.59	1045.87	1495.4	0.515047	4.53898e-08	Pcf11	PCF11 cleavage and polyadenylation factor subunit [Source:MGI Symbol;Acc:MGI:1919579]
ENSMUSG00000034201	425.148	424.435	440.321	438.349	685.355	779.267	851.413	597.441	728.369	432.063	-0.756103	4.71175e-08	Gas2l1	growth arrest-specific 2 like 1 [Source:MGI Symbol;Acc:MGI:1926176]
ENSMUSG00000021614	203.717	253.54	288.306	227.292	426.36	442.765	757.607	638.93	566.416	243.214	-1.22015	4.79358e-08	Vcan	versican [Source:MGI Symbol;Acc:MGI:102889]
ENSMUSG00000090733	9385.36	10975.1	9929.24	10109.7	6495.45	5997.74	6260.64	7757.25	6627.77	10099.9	0.608028	4.82494e-08	Rps27	ribosomal protein S27 [Source:MGI Symbol;Acc:MGI:1888676]
ENSMUSG00000048442	131.752	99.4551	170.887	82.1307	217.855	412.734	392.409	378.142	350.285	121.056	-1.53236	4.84181e-08	Smim5	small integral membrane protein 5 [Source:MGI Symbol;Acc:MGI:1913778]
ENSMUSG00000037594	293.396	177.899	229.596	182.407	84.15	74.6926	77.3361	119.725	88.976	220.824	1.32381	4.89595e-08	Clba1	clathrin binding box of aftiphilin containing 1 [Source:MGI Symbol;Acc:MGI:2443738]
ENSMUSG00000020063	797.152	854.473	834.514	944.503	571.285	573.67	578.589	464.676	547.055	857.661	0.646028	4.93824e-08	Sirt1	sirtuin 1 [Source:MGI Symbol;Acc:MGI:2135607]
ENSMUSG00000031939	632.186	777.431	667.821	741.086	373.065	431.985	489.079	410.148	426.069	704.631	0.72226	4.96564e-08	Taf1d	TATA-box binding protein associated factor, RNA polymerase I, D [Source:MGI Symbol;Acc:MGI:1922566]
ENSMUSG00000002455	2379.28	2518.6	2175.4	2420.95	1684.87	1605.51	1672.04	1346.61	1577.26	2373.55	0.588046	5.02081e-08	Prpf6	pre-mRNA splicing factor 6 [Source:MGI Symbol;Acc:MGI:1922946]
ENSMUSG00000079339	302.253	347.392	332.338	326.613	144.925	189.427	131.042	205.074	167.617	327.149	0.970529	5.02972e-08	Ifit1bl1	interferon induced protein with tetratricpeptide repeats 1B like 1 [Source:MGI Symbol;Acc:MGI:3650685]
ENSMUSG00000026554	8941.39	9409.01	9223.68	10127.9	7357.52	7155.09	7237.37	7034.15	7196.03	9425.49	0.389393	5.03088e-08	Dcaf8	DDB1 and CUL4 associated factor 8 [Source:MGI Symbol;Acc:MGI:91860]
ENSMUSG00000039384	90.7868	82.6458	94.3545	103.141	164.56	209.447	167.562	192.035	183.401	92.732	-0.976928	5.05453e-08	Dusp10	dual specificity phosphatase 10 [Source:MGI Symbol;Acc:MGI:1927070]
ENSMUSG00000040729	280.11	259.144	305.08	294.143	157.08	155.545	162.549	193.22	167.099	284.619	0.777836	5.06374e-08	Cep126	centrosomal protein 126 [Source:MGI Symbol;Acc:MGI:2680221]
ENSMUSG00000034066	731.83	809.649	793.627	725.806	542.3	538.249	475.474	451.637	501.915	765.228	0.605676	5.08713e-08	Farp2	FERM, RhoGEF and pleckstrin domain protein 2 [Source:MGI Symbol;Acc:MGI:2385126]
ENSMUSG00000020811	128.43	109.261	127.903	106.006	241.23	214.837	201.933	207.445	216.361	117.9	-0.874159	5.17295e-08	Wscd1	WSC domain containing 1 [Source:MGI Symbol;Acc:MGI:2448493]
ENSMUSG00000037358	217.002	149.883	170.887	168.081	391.765	375.773	386.68	269.085	355.826	176.463	-1.01297	5.17295e-08	4930578C19Rik	RIKEN cDNA 4930578C19 gene [Source:MGI Symbol;Acc:MGI:1923155]
ENSMUSG00000019944	12521.9	14041.4	14411.1	14531.4	6944.25	9340.42	6055.13	4828.13	6791.98	13876.5	1.03054	5.17338e-08	Rhobtb1	Rho-related BTB domain containing 1 [Source:MGI Symbol;Acc:MGI:1916538]
ENSMUSG00000047045	3832.97	5771.2	5158.05	5223.9	3338.89	2313.93	2448.98	2342.35	2611.04	4996.53	0.936232	5.21299e-08	Tmem164	transmembrane protein 164 [Source:MGI Symbol;Acc:MGI:2148020]
ENSMUSG00000098234	491.577	581.322	510.563	607.385	309.485	287.22	330.827	375.771	325.826	547.712	0.752823	5.27276e-08	Snhg6	small nucleolar RNA host gene 6 [Source:MGI Symbol;Acc:MGI:1921074]
ENSMUSG00000021103	627.757	801.244	723.385	749.682	456.28	391.944	442.534	497.867	447.156	725.517	0.700266	5.34916e-08	Mnat1	menage a trois 1 [Source:MGI Symbol;Acc:MGI:106207]
ENSMUSG00000027610	787.188	757.82	746.449	828.947	563.805	534.399	566.415	538.171	550.697	780.101	0.50281	5.34916e-08	Gss	glutathione synthetase [Source:MGI Symbol;Acc:MGI:95852]
ENSMUSG00000030246	59655.8	66014.4	63613.8	62282.8	48659.3	50801	46812	47101.8	48343.5	62891.7	0.37951	5.37463e-08	Ldhb	lactate dehydrogenase B [Source:MGI Symbol;Acc:MGI:96763]
ENSMUSG00000041645	4149.62	3713.46	3522.57	3659.59	2457.18	2488.73	2577.15	1903.75	2356.7	3761.31	0.673476	5.46027e-08	Ddx24	DEAD (Asp-Glu-Ala-Asp) box polypeptide 24 [Source:MGI Symbol;Acc:MGI:1351337]
ENSMUSG00000001588	14.393	11.2062	6.2903	15.2801	57.035	40.0414	62.2985	48.6013	51.9941	11.7924	-2.13595	5.46417e-08	Acap1	ArfGAP with coiled-coil, ankyrin repeat and PH domains 1 [Source:MGI Symbol;Acc:MGI:2388270]
ENSMUSG00000068479	995.333	1120.62	1087.17	1089.66	810.645	766.177	748.298	746.801	767.98	1073.2	0.482254	5.60215e-08	Mfap1a	microfibrillar-associated protein 1A [Source:MGI Symbol;Acc:MGI:1914782]
ENSMUSG00000021277	601.185	540.7	538.869	487.054	850.85	869.36	808.449	755.099	820.939	541.952	-0.601321	5.65858e-08	Traf3	TNF receptor-associated factor 3 [Source:MGI Symbol;Acc:MGI:108041]
ENSMUSG00000022940	2031.63	2472.37	2281.28	2231.85	1449.25	1506.94	1506.62	1697.49	1540.08	2254.28	0.550048	5.69368e-08	Pigp	phosphatidylinositol glycan anchor biosynthesis, class P [Source:MGI Symbol;Acc:MGI:1860433]
ENSMUSG00000027722	365.361	390.817	400.483	395.373	234.685	254.109	267.812	226.411	245.754	388.008	0.653771	5.72609e-08	Spata5	spermatogenesis associated 5 [Source:MGI Symbol;Acc:MGI:1927170]
ENSMUSG00000039958	1297.59	1423.19	1489.75	1718.06	776.985	994.875	931.614	736.132	859.901	1482.15	0.784002	5.74375e-08	Etfbkmt	electron transfer flavoprotein beta subunit lysine methyltransferase [Source:MGI Symbol;Acc:MGI:2443575]
ENSMUSG00000007812	1173.58	1414.78	1323.06	1542.34	863.94	918.642	802.004	915.127	874.928	1363.44	0.640975	5.75257e-08	Zfp655	zinc finger protein 655 [Source:MGI Symbol;Acc:MGI:1919861]
ENSMUSG00000042895	3070.14	5236.1	4529.02	4280.35	2555.36	1356.02	1856.78	1437.89	1801.51	4278.9	1.24783	5.88871e-08	Abra	actin-binding Rho activating protein [Source:MGI Symbol;Acc:MGI:2444891]
ENSMUSG00000097328	166.073	110.661	149.919	136.566	273.955	253.339	247.762	260.788	258.961	140.805	-0.87158	5.9142e-08	Tnfsf12	tumor necrosis factor (ligand) superfamily, member 12 [Source:MGI Symbol;Acc:MGI:1196259]
ENSMUSG00000052656	1288.73	1411.98	1358.71	1390.49	1035.98	995.645	920.156	999.291	987.768	1362.48	0.464691	5.93136e-08	Rnf103	ring finger protein 103 [Source:MGI Symbol;Acc:MGI:109483]
ENSMUSG00000070319	2343.85	2588.63	2416.52	2691.21	1752.19	1809.56	1923.38	1716.46	1800.4	2510.06	0.478532	6.1051e-08	Eif3g	eukaryotic translation initiation factor 3, subunit G [Source:MGI Symbol;Acc:MGI:1858258]
ENSMUSG00000028494	1014.15	1151.44	1271.69	1100.17	1908.34	1965.88	2971	1883.6	2182.2	1134.36	-0.94459	6.11471e-08	Plin2	perilipin 2 [Source:MGI Symbol;Acc:MGI:87920]
ENSMUSG00000036078	298.932	295.564	320.805	303.693	510.51	474.336	439.67	446.895	467.853	304.748	-0.617236	6.12645e-08	Sigmar1	sigma non-opioid intracellular receptor 1 [Source:MGI Symbol;Acc:MGI:1195268]
ENSMUSG00000032348	3401.18	2990.66	2776.12	3263.26	2177.62	2032.1	2088.79	1706.97	2001.37	3107.81	0.63425	6.18424e-08	Gsta4	glutathione S-transferase, alpha 4 [Source:MGI Symbol;Acc:MGI:1309515]
ENSMUSG00000053332	1369.55	1734.16	1477.17	1394.31	846.175	997.185	1018.26	951.875	953.373	1493.8	0.645892	6.28445e-08	Gas5	growth arrest specific 5 [Source:MGI Symbol;Acc:MGI:95659]
ENSMUSG00000024529	518.149	575.719	704.514	594.97	258.995	170.176	360.902	234.709	256.195	598.338	1.22217	6.38672e-08	Lox	lysyl oxidase [Source:MGI Symbol;Acc:MGI:96817]
ENSMUSG00000060671	654.329	490.272	557.74	559.635	848.045	900.161	920.156	840.447	877.203	565.494	-0.632443	6.5968e-08	Atp8b2	ATPase, class I, type 8B, member 2 [Source:MGI Symbol;Acc:MGI:1859660]
ENSMUSG00000033066	219.217	161.089	178.225	152.801	313.225	363.453	597.923	423.187	424.447	177.833	-1.25622	6.6638e-08	Gas7	growth arrest specific 7 [Source:MGI Symbol;Acc:MGI:1202388]
ENSMUSG00000055204	4120.83	5663.34	5550.14	5619.27	3238.84	3422.77	3220.91	3298.96	3295.37	5238.4	0.668623	6.68329e-08	Ankrd17	ankyrin repeat domain 17 [Source:MGI Symbol;Acc:MGI:1932101]
ENSMUSG00000018166	387.504	375.408	435.079	401.104	598.4	683.014	572.144	605.738	614.824	399.774	-0.619555	6.68329e-08	Erbb3	erb-b2 receptor tyrosine kinase 3 [Source:MGI Symbol;Acc:MGI:95411]
ENSMUSG00000057286	155.002	130.272	134.193	148.981	328.185	364.223	289.294	213.372	298.768	142.112	-1.074	6.81598e-08	St6galnac2	ST6 (alpha-N-acetyl-neuraminyl-2,3-beta-galactosyl-1,3)-N-acetylgalactosaminide alpha-2,6-sialyltransferase 2 [Source:MGI Symbol;Acc:MGI:107553]
ENSMUSG00000044573	1449.27	1578.67	1287.42	1627.33	935.936	917.872	995.344	1055	976.039	1485.67	0.606743	6.87075e-08	Acp1	acid phosphatase 1, soluble [Source:MGI Symbol;Acc:MGI:87881]
ENSMUSG00000045382	50.9292	79.8442	57.6611	57.3005	174.845	133.985	207.662	120.911	159.351	61.4338	-1.38945	6.9075e-08	Cxcr4	chemokine (C-X-C motif) receptor 4 [Source:MGI Symbol;Acc:MGI:109563]
ENSMUSG00000020150	78.608	60.2334	60.8063	71.6256	132.77	184.806	133.906	151.731	150.803	67.8183	-1.14961	7.03823e-08	Gamt	guanidinoacetate methyltransferase [Source:MGI Symbol;Acc:MGI:1098221]
ENSMUSG00000004105	1718.31	1274.71	1333.54	1327.46	2451.57	3489.76	2211.24	2598.39	2687.74	1413.5	-0.927055	7.09139e-08	Angptl2	angiopoietin-like 2 [Source:MGI Symbol;Acc:MGI:1347002]
ENSMUSG00000025076	219.217	205.914	217.015	180.497	359.04	359.602	333.691	308.204	340.134	205.661	-0.729816	7.2214e-08	Casp7	caspase 7 [Source:MGI Symbol;Acc:MGI:109383]
ENSMUSG00000007721	1769.23	1914.86	1760.24	1990.24	1274.41	1231.27	1327.6	1422.48	1313.94	1858.64	0.50143	7.2961e-08	Ccdc124	coiled-coil domain containing 124 [Source:MGI Symbol;Acc:MGI:1916403]
ENSMUSG00000037204	860.26	1102.41	986.529	954.053	652.63	548.259	608.664	667.379	619.233	975.813	0.656873	7.35027e-08	Atg101	autophagy related 101 [Source:MGI Symbol;Acc:MGI:1915368]
ENSMUSG00000071711	1318.62	1456.81	1284.27	1360.89	949.026	1014.9	930.897	1007.59	975.602	1355.15	0.473725	7.35027e-08	Mpst	mercaptopyruvate sulfurtransferase [Source:MGI Symbol;Acc:MGI:2179733]
ENSMUSG00000011831	958.797	1228.48	1180.48	1277.8	694.705	670.693	733.977	797.773	724.287	1161.39	0.682508	7.48288e-08	Evi5	ecotropic viral integration site 5 [Source:MGI Symbol;Acc:MGI:104736]
ENSMUSG00000046516	132.859	140.078	153.064	190.047	267.41	304.161	290.726	269.085	282.846	154.012	-0.872791	7.51587e-08	Cox17	cytochrome c oxidase assembly protein 17, copper chaperone [Source:MGI Symbol;Acc:MGI:1333806]
ENSMUSG00000018008	137.287	133.074	142.58	109.826	297.33	277.98	650.912	317.687	385.977	130.692	-1.56544	7.55469e-08	Cyth4	cytohesin 4 [Source:MGI Symbol;Acc:MGI:2441702]
ENSMUSG00000019578	932.225	1005.76	890.078	905.348	649.825	666.843	691.012	656.711	666.098	933.352	0.483941	7.57579e-08	Ubxn6	UBX domain protein 6 [Source:MGI Symbol;Acc:MGI:1913780]
ENSMUSG00000029919	22.1431	14.0078	18.8709	15.2801	43.945	73.1525	68.0271	109.057	73.5453	17.5755	-2.0526	7.62488e-08	Hpgds	hematopoietic prostaglandin D synthase [Source:MGI Symbol;Acc:MGI:1859384]
ENSMUSG00000029471	1212.34	1025.37	1036.85	1382.85	529.21	630.652	772.645	638.93	642.859	1164.35	0.856656	7.66965e-08	Camkk2	calcium/calmodulin-dependent protein kinase kinase 2, beta [Source:MGI Symbol;Acc:MGI:2444812]
ENSMUSG00000021913	13909.2	14069.4	13860.7	12283.3	9314.48	8423.32	8829.92	6433.16	8250.22	13530.6	0.713453	7.67129e-08	Ogdhl	oxoglutarate dehydrogenase-like [Source:MGI Symbol;Acc:MGI:3616088]
ENSMUSG00000044350	77.5009	89.6497	74.4353	68.7606	143.055	150.925	173.29	146.989	153.565	77.5866	-0.997716	7.7018e-08	Lacc1	laccase domain containing 1 [Source:MGI Symbol;Acc:MGI:2445077]
ENSMUSG00000027217	208.145	148.482	184.516	157.576	539.495	331.111	308.628	407.777	396.753	174.68	-1.17991	7.74488e-08	Tspan18	tetraspanin 18 [Source:MGI Symbol;Acc:MGI:1917186]
ENSMUSG00000028159	569.078	857.275	697.175	530.03	316.03	247.179	300.035	388.811	313.014	663.389	1.0853	7.75426e-08	Dapp1	dual adaptor for phosphotyrosine and 3-phosphoinositides 1 [Source:MGI Symbol;Acc:MGI:1347063]
ENSMUSG00000028576	248.003	257.743	247.419	248.302	114.07	136.295	130.326	170.697	137.847	250.367	0.868398	7.81789e-08	Ift74	intraflagellar transport 74 [Source:MGI Symbol;Acc:MGI:1914944]
ENSMUSG00000038670	280.11	369.805	405.725	266.447	826.54	715.355	808.449	507.35	714.424	330.522	-1.1151	7.81789e-08	Mybpc2	myosin binding protein C, fast-type [Source:MGI Symbol;Acc:MGI:1336170]
ENSMUSG00000048163	44.2862	47.6264	50.3224	39.1553	110.33	120.894	280.701	137.506	162.358	45.3476	-1.84636	7.81789e-08	Selplg	selectin, platelet (p-selectin) ligand [Source:MGI Symbol;Acc:MGI:106689]
ENSMUSG00000062825	5419.53	5350.96	5369.82	5971.67	3827.89	3403.52	4196.2	3252.73	3670.09	5528	0.590595	7.98353e-08	Actg1	actin, gamma, cytoplasmic 1 [Source:MGI Symbol;Acc:MGI:87906]
ENSMUSG00000004837	243.574	232.529	176.128	180.497	402.985	377.313	369.495	339.024	372.204	208.182	-0.844521	8.02285e-08	Grap	GRB2-related adaptor protein [Source:MGI Symbol;Acc:MGI:1918770]
ENSMUSG00000075514	819.295	820.855	783.143	745.862	489.005	568.28	499.104	576.104	533.123	792.289	0.572167	8.24153e-08	Gm13375	predicted gene 13375 [Source:MGI Symbol;Acc:MGI:3649913]
ENSMUSG00000024425	4089.83	4397.04	4308.86	4353.88	3413.69	3225.64	3280.34	3424.62	3336.07	4287.4	0.362307	8.60099e-08	Ndfip1	Nedd4 family interacting protein 1 [Source:MGI Symbol;Acc:MGI:1929601]
ENSMUSG00000052056	381.969	305.369	290.402	370.543	577.83	617.561	534.192	526.317	563.975	337.071	-0.741251	8.6172e-08	Zfp217	zinc finger protein 217 [Source:MGI Symbol;Acc:MGI:2685408]
ENSMUSG00000031095	782.759	844.668	846.046	850.912	504.9	531.318	582.885	619.963	559.767	831.096	0.571903	8.80628e-08	Cul4b	cullin 4B [Source:MGI Symbol;Acc:MGI:1919834]
ENSMUSG00000054200	31.0004	47.6264	15.7258	28.6503	0.935001	0.770027	0	4.74159	1.61166	30.7507	4.47533	8.91605e-08	Ffar4	free fatty acid receptor 4 [Source:MGI Symbol;Acc:MGI:2147577]
ENSMUSG00000029162	748.437	753.617	652.095	779.287	440.385	448.926	515.574	506.165	477.762	733.359	0.618446	8.99063e-08	Khk	ketohexokinase [Source:MGI Symbol;Acc:MGI:1096353]
ENSMUSG00000019923	2352.71	2591.44	2415.48	2535.55	1523.12	1705.61	1906.19	1714.09	1712.25	2473.79	0.529976	8.99199e-08	Zwint	ZW10 interactor [Source:MGI Symbol;Acc:MGI:1289227]
ENSMUSG00000040105	209.252	191.906	181.37	179.542	330.99	419.665	347.296	288.052	346.501	190.518	-0.868145	9.14529e-08	Plpp6	phospholipid phosphatase 6 [Source:MGI Symbol;Acc:MGI:1921661]
ENSMUSG00000074576	375.326	361.4	395.241	405.879	257.125	220.228	250.626	254.861	245.71	384.461	0.650651	9.24369e-08	Mocs3	molybdenum cofactor synthesis 3 [Source:MGI Symbol;Acc:MGI:1916622]
ENSMUSG00000079003	300.039	316.575	312.418	271.222	486.2	521.308	530.612	414.889	488.252	300.064	-0.708328	9.26565e-08	Samd1	sterile alpha motif domain containing 1 [Source:MGI Symbol;Acc:MGI:2142433]
ENSMUSG00000038193	2741.32	3244.2	2462.65	3280.45	1611.01	1419.16	1894.73	1115.46	1510.09	2932.16	0.956195	9.50213e-08	Hand2	heart and neural crest derivatives expressed 2 [Source:MGI Symbol;Acc:MGI:103580]
ENSMUSG00000032737	5299.95	5224.89	5420.14	4755.94	7039.62	7510.07	6742.56	6778.11	7017.59	5175.23	-0.439618	9.77933e-08	Inppl1	inositol polyphosphate phosphatase-like 1 [Source:MGI Symbol;Acc:MGI:1333787]
ENSMUSG00000025041	1679.56	1947.08	1696.29	1815.47	1229.53	1196.62	1353.38	1264.82	1261.09	1784.6	0.499883	9.90845e-08	Nt5c2	5'-nucleotidase, cytosolic II [Source:MGI Symbol;Acc:MGI:2178563]
ENSMUSG00000032431	552.471	502.879	508.466	416.384	718.08	772.337	809.881	806.071	776.592	495.05	-0.65118	9.93629e-08	Crtap	cartilage associated protein [Source:MGI Symbol;Acc:MGI:1891221]
ENSMUSG00000024077	1716.09	2101.16	2049.59	2143.99	1405.31	1319.06	1392.05	1383.36	1374.94	2002.71	0.542711	9.94172e-08	Strn	striatin, calmodulin binding protein [Source:MGI Symbol;Acc:MGI:1333757]
ENSMUSG00000028821	2430.21	2590.03	2396.61	2697.9	1827.93	1868.08	1835.3	1971.32	1875.66	2528.69	0.431649	9.94172e-08	Syf2	SYF2 homolog, RNA splicing factor (S. cerevisiae) [Source:MGI Symbol;Acc:MGI:1915842]
ENSMUSG00000034057	4.42862	14.0078	13.629	4.77504	69.19	46.2016	37.2359	52.1575	51.1963	9.2101	-2.50273	9.97469e-08	Myrfl	myelin regulatory factor-like [Source:MGI Symbol;Acc:MGI:2685085]
ENSMUSG00000029499	1805.77	1994.71	2120.88	1860.36	1380.06	1399.91	1344.79	1460.41	1396.29	1945.43	0.478986	1.01033e-07	Pxmp2	peroxisomal membrane protein 2 [Source:MGI Symbol;Acc:MGI:107487]
ENSMUSG00000059824	748.437	497.275	754.836	514.75	1652.15	4396.85	2076.62	2300.86	2606.62	628.825	-2.05135	1.01739e-07	Dbp	D site albumin promoter binding protein [Source:MGI Symbol;Acc:MGI:94866]
ENSMUSG00000025352	31.0004	15.4085	22.0161	22.9202	64.515	70.0724	79.4843	62.8261	69.2245	22.8363	-1.59105	1.02563e-07	Gdf11	growth differentiation factor 11 [Source:MGI Symbol;Acc:MGI:1338027]
ENSMUSG00000031502	7887.38	6164.82	6433.93	5910.55	17536.9	11661.3	16391	9683.52	13818.2	6599.17	-1.06628	1.0337e-07	Col4a1	collagen, type IV, alpha 1 [Source:MGI Symbol;Acc:MGI:88454]
ENSMUSG00000030220	218.11	240.933	285.16	269.312	394.57	425.055	547.797	464.676	458.025	253.379	-0.853243	1.03828e-07	Arhgdib	Rho, GDP dissociation inhibitor (GDI) beta [Source:MGI Symbol;Acc:MGI:101940]
ENSMUSG00000027342	1356.27	1591.28	1496.04	1534.7	1011.67	956.373	1126.39	1040.78	1033.8	1494.57	0.531082	1.08394e-07	Pcna	proliferating cell nuclear antigen [Source:MGI Symbol;Acc:MGI:97503]
ENSMUSG00000026791	1110.48	851.672	965.562	1026.63	690.965	648.362	627.282	621.149	646.94	988.586	0.613104	1.10252e-07	Slc2a8	solute carrier family 2, (facilitated glucose transporter), member 8 [Source:MGI Symbol;Acc:MGI:1860103]
ENSMUSG00000067698	28.786	32.2178	41.9354	16.2351	3.74	3.85013	0.716075	2.3708	2.66925	29.7936	3.49779	1.10619e-07	Gm10220	predicted gene 10220 [Source:MGI Symbol;Acc:MGI:3798181]
ENSMUSG00000042425	19.9288	26.6147	28.3064	24.8302	98.1751	78.5427	52.9895	103.13	83.2092	24.92	-1.73143	1.10872e-07	Frmpd3	FERM and PDZ domain containing 3 [Source:MGI Symbol;Acc:MGI:3646547]
ENSMUSG00000027770	2114.67	2098.36	2068.46	2281.51	1269.73	1440.72	1475.11	1637.03	1455.65	2140.75	0.557534	1.11312e-07	Dhx36	DEAH (Asp-Glu-Ala-His) box polypeptide 36 [Source:MGI Symbol;Acc:MGI:1919412]
ENSMUSG00000022858	1652.98	1738.36	1739.27	1815.47	1301.52	1282.09	1359.83	1231.63	1293.77	1736.52	0.423741	1.12209e-07	Tra2b	transformer 2 beta [Source:MGI Symbol;Acc:MGI:106016]
ENSMUSG00000047511	25.4646	15.4085	31.4515	36.2903	95.3701	94.7133	92.3737	62.8261	86.3208	27.1537	-1.64988	1.13513e-07	Olfr1396	olfactory receptor 1396 [Source:MGI Symbol;Acc:MGI:3031230]
ENSMUSG00000023942	1165.83	872.683	1113.38	955.008	1713.86	1679.43	1581.09	1493.6	1616.99	1026.73	-0.654588	1.13833e-07	Slc29a1	solute carrier family 29 (nucleoside transporters), member 1 [Source:MGI Symbol;Acc:MGI:1927073]
ENSMUSG00000032495	18183.9	26522.3	24866.6	21418	14306.4	11756	14482.6	13350	13473.8	22747.7	0.755522	1.17698e-07	Lrrc2	leucine rich repeat containing 2 [Source:MGI Symbol;Acc:MGI:1921499]
ENSMUSG00000045962	9936.72	12454.3	11407.5	10650.3	16154	17104.6	14922.3	18118.8	16574.9	11112.2	-0.576905	1.20713e-07	Wnk1	WNK lysine deficient protein kinase 1 [Source:MGI Symbol;Acc:MGI:2442092]
ENSMUSG00000031245	1164.73	1253.69	1168.95	1287.35	786.335	835.479	728.964	924.611	818.847	1218.68	0.575997	1.22774e-07	Hmgn5	high-mobility group nucleosome binding domain 5 [Source:MGI Symbol;Acc:MGI:1355295]
ENSMUSG00000029466	1835.66	2088.56	2017.09	2041.81	1520.31	1397.6	1491.58	1348.98	1439.62	1995.78	0.470277	1.22774e-07	Anapc7	anaphase promoting complex subunit 7 [Source:MGI Symbol;Acc:MGI:1929711]
ENSMUSG00000018999	225.86	177.899	231.693	203.417	319.77	352.672	378.804	355.619	351.716	209.717	-0.742763	1.22774e-07	Slc35b4	solute carrier family 35, member B4 [Source:MGI Symbol;Acc:MGI:1931249]
ENSMUSG00000035778	448.398	495.875	404.676	433.574	913.496	747.696	859.29	615.222	783.926	445.631	-0.818229	1.22774e-07	Ggta1	glycoprotein galactosyltransferase alpha 1, 3 [Source:MGI Symbol;Acc:MGI:95704]
ENSMUSG00000020848	128.43	79.8442	53.4676	90.7258	26.18	20.0207	26.4948	29.635	25.5826	88.1169	1.79345	1.23017e-07	Doc2b	double C2, beta [Source:MGI Symbol;Acc:MGI:1100497]
ENSMUSG00000097353	378.647	386.614	404.676	424.024	554.455	639.892	580.737	590.328	591.353	398.49	-0.568427	1.23285e-07	A430046D13Rik	Riken cDNA A430046D13 gene [Source:MGI Symbol;Acc:MGI:3609643]
ENSMUSG00000052565	71.9651	81.245	193.951	90.7258	28.985	21.5607	25.7787	33.1911	27.3789	109.472	2.01256	1.2573e-07	Hist1h1d	histone cluster 1, H1d [Source:MGI Symbol;Acc:MGI:107502]
ENSMUSG00000022553	3941.47	4112.68	3937.73	4370.12	3163.11	2882.98	3072.68	3154.34	3068.28	4090.5	0.415363	1.2595e-07	Maf1	MAF1 homolog, negative regulator of RNA polymerase III [Source:MGI Symbol;Acc:MGI:1916127]
ENSMUSG00000087484	234.717	215.72	147.822	215.832	110.33	86.243	83.7808	60.4553	85.2023	203.523	1.24939	1.26082e-07	2900089D17Rik	RIKEN cDNA 2900089D17 gene [Source:MGI Symbol;Acc:MGI:1914527]
ENSMUSG00000104654	49.822	60.2334	35.6451	63.0306	16.83	13.0905	14.3215	9.48319	13.4313	52.1827	1.94092	1.26472e-07	Gm43814	predicted gene 43814 [Source:MGI Symbol;Acc:MGI:5663951]
ENSMUSG00000040586	535.863	505.68	464.434	479.414	251.515	275.67	355.173	273.827	289.046	496.348	0.775473	1.27236e-07	Ofd1	OFD1, centriole and centriolar satellite protein [Source:MGI Symbol;Acc:MGI:1350328]
ENSMUSG00000037916	30010.6	33999.6	32465.3	33848.4	25690.1	23382.6	24833.5	23357.1	24315.8	32581	0.422095	1.28815e-07	Ndufv1	NADH:ubiquinone oxidoreductase core subunit V1 [Source:MGI Symbol;Acc:MGI:107851]
ENSMUSG00000003526	2888.57	2431.75	2589.51	2322.58	1509.09	1791.85	1405.66	1149.84	1464.11	2558.1	0.803985	1.3103e-07	Prodh	proline dehydrogenase [Source:MGI Symbol;Acc:MGI:97770]
ENSMUSG00000044162	133.966	183.502	174.032	186.227	86.9551	90.8632	75.1879	86.5341	84.885	169.431	0.999262	1.31164e-07	Tnip3	TNFAIP3 interacting protein 3 [Source:MGI Symbol;Acc:MGI:3041165]
ENSMUSG00000006728	973.19	970.738	981.287	990.344	1228.59	1323.68	1356.25	1345.43	1313.48	978.89	-0.424042	1.328e-07	Cdk4	cyclin-dependent kinase 4 [Source:MGI Symbol;Acc:MGI:88357]
ENSMUSG00000025647	787.188	642.956	634.272	618.845	1132.29	1058.79	1228.78	944.762	1091.15	670.815	-0.703329	1.32885e-07	Shisa5	shisa family member 5 [Source:MGI Symbol;Acc:MGI:1915044]
ENSMUSG00000020773	660.972	563.112	599.676	577.78	955.571	924.802	1006.09	796.588	920.761	600.385	-0.618333	1.3296e-07	Trim47	tripartite motif-containing 47 [Source:MGI Symbol;Acc:MGI:1917374]
ENSMUSG00000054074	88.5724	61.6341	78.6288	82.1307	149.6	160.166	143.215	167.141	155.03	77.7415	-0.983579	1.34546e-07	Skida1	SKI/DACH domain containing 1 [Source:MGI Symbol;Acc:MGI:1919918]
ENSMUSG00000028841	1272.12	1200.47	1413.22	1061.01	660.11	411.964	611.528	272.642	489.061	1236.71	1.33642	1.35147e-07	Cnksr1	connector enhancer of kinase suppressor of Ras 1 [Source:MGI Symbol;Acc:MGI:2670958]
ENSMUSG00000053838	3828.54	4080.46	3829.75	3801.89	3091.11	2999.25	3103.47	2927.93	3030.44	3885.16	0.357592	1.36399e-07	Nudcd3	NudC domain containing 3 [Source:MGI Symbol;Acc:MGI:2144158]
ENSMUSG00000048779	81.9295	85.4473	67.0966	74.4907	148.665	157.085	224.131	152.916	170.7	77.241	-1.15375	1.36984e-07	P2ry6	pyrimidinergic receptor P2Y, G-protein coupled, 6 [Source:MGI Symbol;Acc:MGI:2673874]
ENSMUSG00000047193	203.717	275.953	252.661	247.347	75.735	106.264	101.683	150.546	108.557	244.919	1.18121	1.37429e-07	Dync2h1	dynein cytoplasmic 2 heavy chain 1 [Source:MGI Symbol;Acc:MGI:107736]
ENSMUSG00000024558	427.362	451.05	366.934	421.159	269.28	215.607	274.257	222.855	245.5	416.626	0.759135	1.38729e-07	Mapk4	mitogen-activated protein kinase 4 [Source:MGI Symbol;Acc:MGI:2444559]
ENSMUSG00000051007	300.039	236.731	277.822	254.032	458.15	426.595	429.645	393.552	426.986	267.156	-0.675428	1.4294e-07	Gatd1	glutamine amidotransferase like class 1 domain containing 1 [Source:MGI Symbol;Acc:MGI:2387178]
ENSMUSG00000033721	127.323	99.4551	90.161	107.916	210.375	196.357	192.624	189.664	197.255	106.214	-0.891979	1.44118e-07	Vav3	vav 3 oncogene [Source:MGI Symbol;Acc:MGI:1888518]
ENSMUSG00000105444	7.75009	4.20233	6.2903	10.5051	27.115	70.0724	63.7307	34.3765	48.8237	7.18695	-2.74423	1.44118e-07	Gm10727	predicted gene 10727 [Source:MGI Symbol;Acc:MGI:3642187]
ENSMUSG00000071324	2986	4342.41	4064.58	2959.57	2173.88	1840.36	2084.49	2028.22	2031.74	3588.14	0.820191	1.45565e-07	Armc2	armadillo repeat containing 2 [Source:MGI Symbol;Acc:MGI:1916449]
ENSMUSG00000074918	715.223	641.555	560.885	651.316	992.971	1148.11	1273.9	918.684	1083.42	642.245	-0.756336	1.46312e-07	Inafm2	InaF motif containing 2 [Source:MGI Symbol;Acc:MGI:1915354]
ENSMUSG00000037348	341.004	298.365	336.531	254.032	542.3	805.448	498.388	606.924	613.265	307.483	-0.996791	1.47773e-07	Paqr7	progestin and adipoQ receptor family member VII [Source:MGI Symbol;Acc:MGI:1919154]
ENSMUSG00000087590	279.003	303.968	272.58	288.413	102.85	116.274	158.253	178.995	139.093	285.991	1.04415	1.48181e-07	Epb41l4aos	erythrocyte membrane protein band 4.1 like 4a, opposite strand [Source:MGI Symbol;Acc:MGI:1916999]
ENSMUSG00000029670	512.613	661.166	529.434	598.79	399.245	332.652	334.407	312.945	344.812	575.501	0.736745	1.52044e-07	Ing3	inhibitor of growth family, member 3 [Source:MGI Symbol;Acc:MGI:1919027]
ENSMUSG00000049265	14389.7	13548.3	14224.5	15007	11047	9182.57	9235.22	10672.1	10034.2	14292.4	0.510614	1.52044e-07	Kcnk3	potassium channel, subfamily K, member 3 [Source:MGI Symbol;Acc:MGI:1100509]
ENSMUSG00000031149	32.1075	37.821	47.1773	41.0654	88.8251	93.1732	101.683	88.9049	93.1464	39.5428	-1.23455	1.54711e-07	Praf2	PRA1 domain family 2 [Source:MGI Symbol;Acc:MGI:1859607]
ENSMUSG00000055805	468.327	347.392	345.967	332.343	936.871	763.096	998.925	544.098	810.747	373.507	-1.11968	1.60823e-07	Fmnl1	formin-like 1 [Source:MGI Symbol;Acc:MGI:1888994]
ENSMUSG00000028851	3577.22	4161.71	3626.36	3876.38	2624.55	2888.37	2799.14	2814.14	2781.55	3810.42	0.453527	1.60848e-07	Nudc	nudC nuclear distribution protein [Source:MGI Symbol;Acc:MGI:106014]
ENSMUSG00000068245	164.966	163.891	154.112	107.916	308.55	283.37	248.478	296.35	284.187	147.721	-0.948	1.60994e-07	Phf11d	PHD finger protein 11D [Source:MGI Symbol;Acc:MGI:1277133]
ENSMUSG00000059401	575.721	521.089	474.918	488.964	302.005	354.982	325.814	267.9	312.675	515.173	0.714664	1.6127e-07	Mamld1	mastermind-like domain containing 1 [Source:MGI Symbol;Acc:MGI:3045303]
ENSMUSG00000029815	871.331	1030.97	951.933	957.873	559.13	608.321	618.689	715.981	625.53	953.027	0.608833	1.61555e-07	Malsu1	mitochondrial assembly of ribosomal large subunit 1 [Source:MGI Symbol;Acc:MGI:1922843]
ENSMUSG00000097162	152.787	163.891	143.629	195.777	96.3051	69.3024	78.0522	64.0115	76.9178	164.021	1.09103	1.61805e-07	2310010J17Rik	RIKEN cDNA 2310010J17 gene [Source:MGI Symbol;Acc:MGI:1925579]
ENSMUSG00000034947	117.358	117.665	118.467	92.6358	213.18	237.938	355.173	208.63	253.73	111.532	-1.19313	1.62729e-07	Tmem106a	transmembrane protein 106A [Source:MGI Symbol;Acc:MGI:1922056]
ENSMUSG00000000320	280.11	250.739	206.532	237.797	123.42	126.284	144.647	144.619	134.743	243.794	0.855162	1.63196e-07	Alox12	arachidonate 12-lipoxygenase [Source:MGI Symbol;Acc:MGI:87998]
ENSMUSG00000026395	98.5368	123.268	116.371	112.691	201.96	222.538	423.916	311.76	290.043	112.717	-1.36603	1.63919e-07	Ptprc	protein tyrosine phosphatase, receptor type, C [Source:MGI Symbol;Acc:MGI:97810]
ENSMUSG00000109498	119.573	106.459	55.5643	101.231	28.985	16.1706	25.7787	4.74159	18.919	95.7068	2.31296	1.64312e-07	Gm45222	predicted gene 45222 [Source:MGI Symbol;Acc:MGI:5753798]
ENSMUSG00000047945	59.7864	79.8442	69.1933	65.8956	129.03	130.905	156.104	137.506	138.386	68.6799	-1.0203	1.64312e-07	Marcksl1	MARCKS-like 1 [Source:MGI Symbol;Acc:MGI:97143]
ENSMUSG00000020021	319.968	242.334	283.064	297.963	462.825	458.166	451.127	430.3	450.604	285.832	-0.65315	1.66695e-07	Fgd6	FYVE, RhoGEF and PH domain containing 6 [Source:MGI Symbol;Acc:MGI:1261419]
ENSMUSG00000107451	190.431	208.716	214.919	251.167	90.6951	137.065	90.9415	88.9049	101.902	216.308	1.08152	1.67171e-07	Gm44421	predicted gene, 44421 [Source:MGI Symbol;Acc:MGI:5690813]
ENSMUSG00000047875	4159.58	4335.4	3792	3732.17	3050.91	2383.23	2302.9	2174.02	2477.76	4004.79	0.692356	1.70255e-07	Gpr157	G protein-coupled receptor 157 [Source:MGI Symbol;Acc:MGI:2442046]
ENSMUSG00000039879	2426.89	2536.81	2445.88	2488.75	1825.12	1526.96	1878.26	1780.47	1752.7	2474.58	0.497725	1.70255e-07	Heca	hdc homolog, cell cycle regulator [Source:MGI Symbol;Acc:MGI:2685715]
ENSMUSG00000004698	467.22	467.859	518.95	373.408	737.715	698.414	814.893	955.431	801.613	456.859	-0.810663	1.70255e-07	Hdac9	histone deacetylase 9 [Source:MGI Symbol;Acc:MGI:1931221]
ENSMUSG00000031955	503.756	381.011	419.354	356.218	712.47	693.794	751.163	624.705	695.533	415.085	-0.746028	1.71207e-07	Bcar1	breast cancer anti-estrogen resistance 1 [Source:MGI Symbol;Acc:MGI:108091]
ENSMUSG00000034449	4195.01	4091.67	3908.38	4470.39	2974.24	3164.81	3144.29	2727.6	3002.73	4166.36	0.471911	1.72485e-07	Dhrs11	dehydrogenase/reductase (SDR family) member 11 [Source:MGI Symbol;Acc:MGI:2652816]
ENSMUSG00000029571	7795.48	10309.7	10382.1	10498.4	5597.85	4845.01	5272.46	6874.12	5647.36	9746.44	0.78762	1.72745e-07	Tmem106b	transmembrane protein 106B [Source:MGI Symbol;Acc:MGI:1919150]
ENSMUSG00000027875	457.255	299.766	321.854	438.349	670.395	735.376	686	964.914	764.171	379.306	-1.00665	1.74409e-07	Hmgcs2	3-hydroxy-3-methylglutaryl-Coenzyme A synthase 2 [Source:MGI Symbol;Acc:MGI:101939]
ENSMUSG00000002831	33851.3	26046	22956.5	28491.7	14541.1	14927	15298.9	8505.23	13318.1	27836.4	1.06347	1.75214e-07	Plin4	perilipin 4 [Source:MGI Symbol;Acc:MGI:1929709]
ENSMUSG00000114796	508.184	557.509	453.95	367.678	201.025	194.817	176.154	68.7531	160.187	471.83	1.55141	1.79235e-07	A930028N01Rik	RIKEN cDNA A930028N01 gene [Source:MGI Symbol;Acc:MGI:1925688]
ENSMUSG00000021715	566.864	655.563	595.482	594.015	402.05	405.804	439.67	382.884	407.602	602.981	0.560198	1.79796e-07	Cwc27	CWC27 spliceosome-associated protein [Source:MGI Symbol;Acc:MGI:1914535]
ENSMUSG00000062661	214.788	249.338	209.677	163.306	384.285	391.174	453.992	331.911	390.34	209.277	-0.90821	1.81874e-07	Ncs1	neuronal calcium sensor 1 [Source:MGI Symbol;Acc:MGI:109166]
ENSMUSG00000023143	317.754	261.945	276.773	247.347	516.12	432.755	453.275	418.446	455.149	275.955	-0.722639	1.82493e-07	Nagpa	N-acetylglucosamine-1-phosphodiester alpha-N-acetylglucosaminidase [Source:MGI Symbol;Acc:MGI:1351598]
ENSMUSG00000051768	1023.01	1082.8	1049.43	1029.5	799.425	736.916	770.497	676.862	745.925	1046.19	0.485542	1.83062e-07	Xrcc1	X-ray repair complementing defective repair in Chinese hamster cells 1 [Source:MGI Symbol;Acc:MGI:99137]
ENSMUSG00000087528	173.823	274.552	154.112	173.812	94.4351	57.752	83.7808	69.9385	76.4766	194.075	1.33796	1.83358e-07	9830144P21Rik	RIKEN cDNA 9830144P21 gene [Source:MGI Symbol;Acc:MGI:3041171]
ENSMUSG00000048285	815.974	917.508	881.691	843.272	1251.03	1299.04	1109.2	1312.24	1242.88	864.611	-0.523441	1.83358e-07	Frmd6	FERM domain containing 6 [Source:MGI Symbol;Acc:MGI:2442579]
ENSMUSG00000000881	176.038	109.261	141.532	151.846	319.77	286.45	271.392	244.192	280.451	144.669	-0.95005	1.84792e-07	Dlg3	discs large MAGUK scaffold protein 3 [Source:MGI Symbol;Acc:MGI:1888986]
ENSMUSG00000039765	358.718	259.144	265.241	280.772	492.745	608.321	448.263	580.845	532.544	290.969	-0.869891	1.88922e-07	Cc2d2a	coiled-coil and C2 domain containing 2A [Source:MGI Symbol;Acc:MGI:1924487]
ENSMUSG00000042453	409.648	526.692	435.079	452.674	287.045	200.977	236.305	151.731	219.014	456.023	1.05307	1.91045e-07	Reln	reelin [Source:MGI Symbol;Acc:MGI:103022]
ENSMUSG00000037347	58.6792	51.8287	49.274	54.4355	119.68	98.5634	118.868	118.54	113.913	53.5544	-1.08535	1.93521e-07	Chst7	carbohydrate (N-acetylglucosamino) sulfotransferase 7 [Source:MGI Symbol;Acc:MGI:1891767]
ENSMUSG00000042228	401.897	345.992	354.354	285.548	623.645	612.171	763.336	521.575	630.182	346.948	-0.864479	2.0075e-07	Lyn	LYN proto-oncogene, Src family tyrosine kinase [Source:MGI Symbol;Acc:MGI:96892]
ENSMUSG00000024789	1481.37	1898.05	1694.19	1782.05	1032.24	1128.09	1159.33	1228.07	1136.93	1713.91	0.592126	2.01532e-07	Jak2	Janus kinase 2 [Source:MGI Symbol;Acc:MGI:96629]
ENSMUSG00000003123	1475.84	1186.46	1041.05	1133.59	2197.25	2236.16	2353.02	1685.64	2118.02	1209.23	-0.809559	2.01923e-07	Lipe	lipase, hormone sensitive [Source:MGI Symbol;Acc:MGI:96790]
ENSMUSG00000052593	897.903	1071.59	1036.85	923.493	1449.25	1355.25	1372	1386.92	1390.85	982.46	-0.502778	2.05455e-07	Adam17	a disintegrin and metallopeptidase domain 17 [Source:MGI Symbol;Acc:MGI:1096335]
ENSMUSG00000107997	155.002	238.132	140.483	153.756	76.67	36.1913	33.6555	15.4102	40.4818	171.843	2.07739	2.08294e-07	Gm44243	predicted gene, 44243 [Source:MGI Symbol;Acc:MGI:5690635]
ENSMUSG00000032625	448.398	637.353	495.886	522.39	313.225	339.582	282.85	296.35	308.002	526.007	0.76903	2.09687e-07	Thsd7a	thrombospondin, type I, domain containing 7A [Source:MGI Symbol;Acc:MGI:2685683]
ENSMUSG00000090272	419.612	407.626	310.322	216.787	871.421	798.518	710.346	614.036	748.58	338.587	-1.14836	2.15721e-07	Mndal	myeloid nuclear differentiation antigen like [Source:MGI Symbol;Acc:MGI:3780953]
ENSMUSG00000025474	1316.41	1225.68	1162.66	1161.29	791.945	882.451	887.933	730.205	823.134	1216.51	0.560533	2.16247e-07	Tubgcp2	tubulin, gamma complex associated protein 2 [Source:MGI Symbol;Acc:MGI:1921487]
ENSMUSG00000027649	623.329	666.769	707.659	679.966	447.865	432.755	492.66	472.974	461.563	669.431	0.536939	2.18931e-07	Ctnnbl1	catenin, beta like 1 [Source:MGI Symbol;Acc:MGI:1913892]
ENSMUSG00000038975	2704.78	3454.31	3181.85	3269.95	2057.94	2020.55	2259.22	2240.4	2144.53	3152.72	0.555829	2.19758e-07	Rabggtb	Rab geranylgeranyl transferase, b subunit [Source:MGI Symbol;Acc:MGI:99537]
ENSMUSG00000020782	889.046	764.824	755.885	824.172	564.74	572.13	566.415	507.35	552.659	808.482	0.547336	2.20221e-07	Llgl2	LLGL2 scribble cell polarity complex component [Source:MGI Symbol;Acc:MGI:1918843]
ENSMUSG00000114196	250.217	282.957	242.177	265.492	478.72	523.618	446.115	851.116	574.892	260.211	-1.14143	2.27058e-07	Gm47547	predicted gene, 47547 [Source:MGI Symbol;Acc:MGI:6096561]
ENSMUSG00000035877	954.368	711.594	844.997	774.512	1577.35	1483.07	1395.63	1127.31	1395.84	821.368	-0.765132	2.27153e-07	Zhx3	zinc fingers and homeoboxes 3 [Source:MGI Symbol;Acc:MGI:2444772]
ENSMUSG00000109814	52.0363	44.8248	18.8709	19.1002	2.805	3.85013	2.8643	4.74159	3.56526	33.7081	3.25545	2.28045e-07	Gm45847	predicted gene 45847 [Source:MGI Symbol;Acc:MGI:5804962]
ENSMUSG00000038508	141.716	336.186	236.935	108.871	78.54	46.9716	39.3841	42.6743	51.8925	205.927	1.98619	2.28427e-07	Gdf15	growth differentiation factor 15 [Source:MGI Symbol;Acc:MGI:1346047]
ENSMUSG00000038172	1254.41	1640.31	1616.61	1330.33	751.74	770.027	818.474	1037.22	844.366	1460.41	0.79162	2.33244e-07	Ttc39b	tetratricopeptide repeat domain 39B [Source:MGI Symbol;Acc:MGI:1917113]
ENSMUSG00000041889	323.289	243.735	252.661	313.243	152.405	173.256	160.401	155.287	160.337	283.232	0.821873	2.3354e-07	Shisa4	shisa family member 4 [Source:MGI Symbol;Acc:MGI:1924802]
ENSMUSG00000013584	34.3218	40.6225	88.0642	47.7504	152.405	118.584	428.929	335.468	258.846	52.6897	-2.2926	2.4042e-07	Aldh1a2	aldehyde dehydrogenase family 1, subfamily A2 [Source:MGI Symbol;Acc:MGI:107928]
ENSMUSG00000051212	5.53578	1.40078	2.09677	1.91002	21.505	21.5607	37.952	50.9721	32.9975	2.73583	-3.57075	2.43484e-07	Gpr183	G protein-coupled receptor 183 [Source:MGI Symbol;Acc:MGI:2442034]
ENSMUSG00000100826	652.115	495.875	741.207	866.193	277.695	313.401	349.445	407.777	337.079	688.847	1.03497	2.43952e-07	Snhg14	small nucleolar RNA host gene 14 [Source:MGI Symbol;Acc:MGI:1289201]
ENSMUSG00000060678	22.1431	74.2411	59.7579	15.2801	2.805	3.85013	2.14822	5.92699	3.68259	42.8556	3.57686	2.44467e-07	Hist1h4c	histone cluster 1, H4c [Source:MGI Symbol;Acc:MGI:2448421]
ENSMUSG00000055991	840.331	739.61	646.853	888.158	513.315	426.595	484.067	474.159	474.534	778.738	0.716023	2.4514e-07	Zkscan5	zinc finger with KRAB and SCAN domains 5 [Source:MGI Symbol;Acc:MGI:107533]
ENSMUSG00000022010	5448.31	5914.08	6070.14	4450.34	7940.96	8608.9	10012.9	8532.5	8773.81	5470.72	-0.681792	2.46579e-07	Tsc22d1	TSC22 domain family, member 1 [Source:MGI Symbol;Acc:MGI:109127]
ENSMUSG00000049775	3934.83	5457.42	5348.85	4621.29	7453.82	7106.58	8864.29	9172.61	8149.33	4840.6	-0.751575	2.46579e-07	Tmsb4x	thymosin, beta 4, X chromosome [Source:MGI Symbol;Acc:MGI:99510]
ENSMUSG00000040721	701.937	661.166	434.031	571.095	363.715	299.54	289.294	271.456	306.002	592.057	0.95044	2.47262e-07	Zfhx2	zinc finger homeobox 2 [Source:MGI Symbol;Acc:MGI:2686934]
ENSMUSG00000022962	1908.74	2012.92	1977.25	2062.82	1503.48	1434.56	1494.45	1251.78	1421.07	1990.43	0.484651	2.47627e-07	Gart	phosphoribosylglycinamide formyltransferase [Source:MGI Symbol;Acc:MGI:95654]
ENSMUSG00000025277	414.076	404.824	399.434	487.054	287.98	273.359	257.071	228.782	261.798	426.347	0.702558	2.48586e-07	Abhd6	abhydrolase domain containing 6 [Source:MGI Symbol;Acc:MGI:1913332]
ENSMUSG00000024404	3726.69	4011.82	3819.26	3863.01	2881.67	2891.45	3160.04	2824.8	2939.49	3855.19	0.390362	2.49607e-07	Riok3	RIO kinase 3 [Source:MGI Symbol;Acc:MGI:1914128]
ENSMUSG00000032724	1613.13	1896.65	1945.8	1681.77	1292.17	1218.18	1251.7	1103.61	1216.41	1784.34	0.551322	2.49837e-07	Abtb2	ankyrin repeat and BTB (POZ) domain containing 2 [Source:MGI Symbol;Acc:MGI:2139365]
ENSMUSG00000033685	2142.35	1374.16	1666.93	1316.96	2762.93	3058.55	2880.77	2978.91	2920.29	1625.1	-0.845402	2.50761e-07	Ucp2	uncoupling protein 2 (mitochondrial, proton carrier) [Source:MGI Symbol;Acc:MGI:109354]
ENSMUSG00000019846	1830.13	1559.06	1622.9	1433.47	2669.43	3024.66	2235.59	2430.07	2589.94	1611.39	-0.684853	2.61113e-07	Lama4	laminin, alpha 4 [Source:MGI Symbol;Acc:MGI:109321]
ENSMUSG00000024014	1442.62	1043.58	1035.8	1521.33	739.585	574.44	725.384	695.829	683.81	1260.83	0.883975	2.61517e-07	Pim1	proviral integration site 1 [Source:MGI Symbol;Acc:MGI:97584]
ENSMUSG00000024981	353.183	359.999	387.902	331.388	486.2	555.959	552.094	567.806	540.515	358.118	-0.594484	2.62591e-07	Acsl5	acyl-CoA synthetase long-chain family member 5 [Source:MGI Symbol;Acc:MGI:1919129]
ENSMUSG00000061032	4223.8	4213.53	4227.08	4209.68	3380.96	3334.22	3396.34	3071.37	3295.72	4218.52	0.355418	2.65124e-07	Rrp1	ribosomal RNA processing 1 homolog (S. cerevisiae) [Source:MGI Symbol;Acc:MGI:1203500]
ENSMUSG00000017707	27205	25813.5	25284.9	24717.5	18352.2	18004	19223.7	14691.8	17567.9	25755.2	0.551762	2.70494e-07	Serinc3	serine incorporator 3 [Source:MGI Symbol;Acc:MGI:1349457]
ENSMUSG00000039294	288.968	226.926	253.709	277.907	425.425	385.783	477.622	425.558	428.597	261.877	-0.707572	2.71019e-07	Cybc1	cytochrome b 245 chaperone 1 [Source:MGI Symbol;Acc:MGI:2384959]
ENSMUSG00000048661	849.188	1102.41	981.287	1159.38	647.02	659.143	666.666	651.969	656.2	1023.07	0.640316	2.71265e-07	Lemd3	LEM domain containing 3 [Source:MGI Symbol;Acc:MGI:3580376]
ENSMUSG00000020650	1858.91	2115.17	2073.7	2085.74	1238.88	1323.68	1374.86	1582.51	1379.98	2033.38	0.560307	2.71265e-07	Bcap29	B cell receptor associated protein 29 [Source:MGI Symbol;Acc:MGI:101917]
ENSMUSG00000026135	240.253	156.887	199.193	192.912	490.875	417.354	444.683	291.608	411.13	197.311	-1.0588	2.74644e-07	Zfp142	zinc finger protein 142 [Source:MGI Symbol;Acc:MGI:1924514]
ENSMUSG00000026069	18.8216	18.2101	23.0644	21.9652	68.255	56.212	56.5699	58.0845	59.7804	20.5153	-1.53181	2.79725e-07	Il1rl1	interleukin 1 receptor-like 1 [Source:MGI Symbol;Acc:MGI:98427]
ENSMUSG00000023176	22.1431	29.4163	16.7741	44.8854	81.345	147.845	77.3361	126.838	108.341	28.3047	-1.92915	2.79725e-07	Cpn2	carboxypeptidase N, polypeptide 2 [Source:MGI Symbol;Acc:MGI:1919006]
ENSMUSG00000023439	812.652	921.711	1203.54	643.676	471.24	455.086	441.818	455.193	455.834	895.396	0.973753	2.82808e-07	Gnb3	guanine nucleotide binding protein (G protein), beta 3 [Source:MGI Symbol;Acc:MGI:95785]
ENSMUSG00000026782	612.257	670.972	635.321	631.261	392.7	459.706	460.436	432.67	436.378	637.452	0.543541	2.83459e-07	Abi2	abl-interactor 2 [Source:MGI Symbol;Acc:MGI:106913]
ENSMUSG00000026014	6504.54	6718.12	7238.04	7485.36	3866.23	4468.47	5220.19	3583.46	4284.58	6986.51	0.704965	2.85956e-07	Raph1	Ras association (RalGDS/AF-6) and pleckstrin homology domains 1 [Source:MGI Symbol;Acc:MGI:1924550]
ENSMUSG00000001027	623.329	396.42	351.209	400.149	901.341	1281.32	968.133	770.509	980.327	442.776	-1.14757	2.86409e-07	Scn4a	sodium channel, voltage-gated, type IV, alpha [Source:MGI Symbol;Acc:MGI:98250]
ENSMUSG00000074364	2889.68	1874.24	2010.8	1623.51	5374.38	4757.23	4920.87	3155.53	4552	2099.56	-1.11666	2.87766e-07	Ehd2	EH-domain containing 2 [Source:MGI Symbol;Acc:MGI:2154274]
ENSMUSG00000105348	44.2862	15.4085	15.7258	41.0654	2.805	0	1.43215	0	1.05929	29.1215	4.75704	2.8866e-07	Gm35212	predicted gene, 35212 [Source:MGI Symbol;Acc:MGI:5594371]
ENSMUSG00000053799	1733.81	2077.35	1998.22	1828.84	1374.45	1213.56	1204.44	1410.62	1300.77	1909.55	0.554704	2.8866e-07	Exoc6	exocyst complex component 6 [Source:MGI Symbol;Acc:MGI:1351611]
ENSMUSG00000108802	12.1787	21.0116	27.258	16.2351	86.9551	110.114	43.6806	78.2363	79.7464	19.1709	-2.05821	2.89041e-07	Gm44769	predicted gene 44769 [Source:MGI Symbol;Acc:MGI:5753345]
ENSMUSG00000050332	215.895	144.28	162.5	150.891	273.955	347.282	320.086	315.316	314.16	168.392	-0.899031	2.91473e-07	Amer1	APC membrane recruitment 1 [Source:MGI Symbol;Acc:MGI:1919595]
ENSMUSG00000073725	2222.06	2491.98	2198.46	2359.83	1706.38	1611.67	1571.78	1811.29	1675.28	2318.08	0.469297	2.94101e-07	Lmbrd1	LMBR1 domain containing 1 [Source:MGI Symbol;Acc:MGI:1915671]
ENSMUSG00000032649	161.645	180.7	153.064	122.241	369.325	397.334	259.219	270.271	324.037	154.412	-1.07561	2.94566e-07	Colgalt2	collagen beta(1-O)galactosyltransferase 2 [Source:MGI Symbol;Acc:MGI:2138232]
ENSMUSG00000023965	1227.84	1246.69	1209.84	1164.16	868.616	813.148	894.378	949.504	881.411	1212.13	0.460755	2.96098e-07	Fbxl17	F-box and leucine-rich repeat protein 17 [Source:MGI Symbol;Acc:MGI:1354704]
ENSMUSG00000037892	78.608	82.6458	71.2901	85.9508	154.275	144.765	143.215	189.664	157.98	79.6237	-0.981447	2.97439e-07	Pcdh18	protocadherin 18 [Source:MGI Symbol;Acc:MGI:1920423]
ENSMUSG00000024672	24.3574	16.8093	7.33869	19.1002	53.295	62.3722	92.3737	61.6407	67.4204	16.9014	-2.0028	3.00212e-07	Ms4a7	membrane-spanning 4-domains, subfamily A, member 7 [Source:MGI Symbol;Acc:MGI:1918846]
ENSMUSG00000075271	75.2866	86.8481	97.4997	103.141	178.585	197.127	150.376	213.372	184.865	90.6938	-1.01836	3.01269e-07	Ttc30a1	tetratricopeptide repeat domain 30A1 [Source:MGI Symbol;Acc:MGI:1926052]
ENSMUSG00000032038	1013.05	1220.08	1116.53	1147.92	745.195	813.918	813.461	795.402	791.994	1124.39	0.504118	3.02518e-07	St3gal4	ST3 beta-galactoside alpha-2,3-sialyltransferase 4 [Source:MGI Symbol;Acc:MGI:1316743]
ENSMUSG00000027078	172.716	183.502	161.451	127.971	310.42	287.22	255.639	343.765	299.261	161.41	-0.892672	3.03316e-07	Ube2l6	ubiquitin-conjugating enzyme E2L 6 [Source:MGI Symbol;Acc:MGI:1914500]
ENSMUSG00000032456	840.331	875.485	828.223	792.657	593.725	605.241	612.96	627.076	609.751	834.174	0.45119	3.05936e-07	Nmnat3	nicotinamide nucleotide adenylyltransferase 3 [Source:MGI Symbol;Acc:MGI:1921330]
ENSMUSG00000029561	204.824	165.292	206.532	154.711	393.635	339.582	325.098	284.496	335.703	182.84	-0.877373	3.10834e-07	Oasl2	2'-5' oligoadenylate synthetase-like 2 [Source:MGI Symbol;Acc:MGI:1344390]
ENSMUSG00000013833	1833.45	1755.17	1853.54	1767.72	1403.44	1385.28	1433.58	1338.31	1390.15	1802.47	0.374094	3.1119e-07	Med16	mediator complex subunit 16 [Source:MGI Symbol;Acc:MGI:2158394]
ENSMUSG00000004535	4931.27	6090.57	5995.71	5683.25	3819.48	3810.09	4085.21	4216.46	3982.81	5675.2	0.510925	3.17236e-07	Tax1bp1	Tax1 (human T cell leukemia virus type I) binding protein 1 [Source:MGI Symbol;Acc:MGI:1289308]
ENSMUSG00000085767	14.393	11.2062	15.7258	19.1002	53.295	58.522	49.4092	43.8597	51.2715	15.1063	-1.74641	3.17236e-07	Gm13563	predicted gene 13563 [Source:MGI Symbol;Acc:MGI:3652052]
ENSMUSG00000039239	170.502	165.292	203.386	147.071	280.5	313.401	371.643	286.866	313.103	171.563	-0.871362	3.19147e-07	Tgfb2	transforming growth factor, beta 2 [Source:MGI Symbol;Acc:MGI:98726]
ENSMUSG00000108596	31.0004	28.0155	14.6774	25.7852	0.935001	3.08011	2.8643	2.3708	2.31255	24.8696	3.39034	3.22404e-07	Gm49368	predicted gene, 49368 [Source:MGI Symbol;Acc:MGI:6121583]
ENSMUSG00000000253	4593.59	5110.03	4711.44	4826.61	3362.26	3797.77	3054.78	3445.95	3415.19	4810.42	0.494103	3.22404e-07	Gmpr	guanosine monophosphate reductase [Source:MGI Symbol;Acc:MGI:1913605]
ENSMUSG00000021738	1424.91	1390.97	1314.67	1368.53	1023.83	1031.84	1064.8	937.65	1014.53	1374.77	0.436134	3.22796e-07	Atxn7	ataxin 7 [Source:MGI Symbol;Acc:MGI:2179277]
ENSMUSG00000051375	646.579	428.637	466.531	424.979	1200.54	1074.19	1180.81	705.312	1040.21	491.681	-1.08195	3.22796e-07	Pcdh1	protocadherin 1 [Source:MGI Symbol;Acc:MGI:104692]
ENSMUSG00000073412	1.10716	2.80155	3.14515	0.955008	22.44	16.1706	40.8163	43.8597	30.8216	2.00222	-3.9762	3.23694e-07	Lst1	leukocyte specific transcript 1 [Source:MGI Symbol;Acc:MGI:1096324]
ENSMUSG00000040596	515.935	535.096	510.563	531.94	731.17	682.244	776.941	764.582	738.734	523.383	-0.496971	3.23882e-07	Pogk	pogo transposable element with KRAB domain [Source:MGI Symbol;Acc:MGI:1918842]
ENSMUSG00000024687	8285.95	8457.89	8292.72	7214.13	5903.59	5356.31	6204.79	5309.4	5693.52	8062.67	0.501549	3.24564e-07	Osbp	oxysterol binding protein [Source:MGI Symbol;Acc:MGI:97447]
ENSMUSG00000020078	3217.39	4121.08	3636.84	3672.96	2666.62	2595.76	2508.41	2522.53	2573.33	3662.07	0.508554	3.2558e-07	Vps26a	VPS26 retromer complex component A [Source:MGI Symbol;Acc:MGI:1353654]
ENSMUSG00000040410	540.292	557.509	534.676	568.23	384.285	391.174	396.706	392.367	391.133	550.177	0.491907	3.2558e-07	Fbxl4	F-box and leucine-rich repeat protein 4 [Source:MGI Symbol;Acc:MGI:2140367]
ENSMUSG00000039108	2529.85	2477.97	2467.9	2392.3	1905.53	2006.69	1884.71	1814.84	1902.94	2467	0.373519	3.26296e-07	Lsm14b	LSM family member 14B [Source:MGI Symbol;Acc:MGI:3040677]
ENSMUSG00000026187	996.44	1148.64	1003.3	1014.22	641.41	679.164	630.862	797.773	687.302	1040.65	0.600115	3.29464e-07	Xrcc5	X-ray repair complementing defective repair in Chinese hamster cells 5 [Source:MGI Symbol;Acc:MGI:104517]
ENSMUSG00000085208	396.362	395.019	374.273	350.488	572.22	554.419	519.87	555.952	550.615	379.035	-0.540046	3.30441e-07	Brip1os	BRCA1 interacting protein C-terminal helicase 1, opposite strand [Source:MGI Symbol;Acc:MGI:1921288]
ENSMUSG00000065036	17.7145	36.4202	30.4031	30.5603	1.87	3.85013	5.7286	3.55619	3.75123	28.7745	2.89757	3.32671e-07	Gm22362	predicted gene, 22362 [Source:MGI Symbol;Acc:MGI:5452139]
ENSMUSG00000036748	2227.6	2613.85	2434.35	2535.55	1813.9	1718.7	1714.28	1890.71	1784.4	2452.83	0.459604	3.33198e-07	Cuedc2	CUE domain containing 2 [Source:MGI Symbol;Acc:MGI:1914366]
ENSMUSG00000064344	31.0004	120.467	78.6288	66.8506	274.89	201.747	226.28	243.007	236.481	74.2366	-1.68078	3.39293e-07	mt-Tm	mitochondrially encoded tRNA methionine [Source:MGI Symbol;Acc:MGI:102480]
ENSMUSG00000054263	3239.54	4189.72	3403.05	3194.5	2292.62	2432.51	2247.04	1941.68	2228.47	3506.7	0.65289	3.42502e-07	Lifr	leukemia inhibitory factor receptor [Source:MGI Symbol;Acc:MGI:96788]
ENSMUSG00000002458	70.858	70.0388	71.2901	81.1757	127.16	158.626	196.205	142.248	156.059	73.3406	-1.09202	3.42884e-07	Rgs19	regulator of G-protein signaling 19 [Source:MGI Symbol;Acc:MGI:1915153]
ENSMUSG00000028689	99.644	58.8326	77.5804	83.0857	195.415	178.646	186.896	135.135	174.023	79.7857	-1.12156	3.45519e-07	Ccdc163	coiled-coil domain containing 163 [Source:MGI Symbol;Acc:MGI:1915644]
ENSMUSG00000053080	889.046	808.248	820.885	766.872	1428.68	1406.07	1214.46	1079.9	1282.28	821.263	-0.643965	3.4644e-07	2700081O15Rik	RIKEN cDNA 2700081O15 gene [Source:MGI Symbol;Acc:MGI:1919667]
ENSMUSG00000051817	398.576	343.19	360.644	342.848	508.64	653.753	538.488	643.671	586.138	361.315	-0.696623	3.47639e-07	Sox12	SRY (sex determining region Y)-box 12 [Source:MGI Symbol;Acc:MGI:98360]
ENSMUSG00000014932	354.29	466.458	428.789	417.339	588.115	713.045	643.751	724.278	667.297	416.719	-0.680419	3.50942e-07	Yes1	YES proto-oncogene 1, Src family tyrosine kinase [Source:MGI Symbol;Acc:MGI:99147]
ENSMUSG00000021994	169.395	142.879	220.161	192.912	366.52	385.013	297.171	521.575	392.57	181.337	-1.10657	3.5216e-07	Wnt5a	wingless-type MMTV integration site family, member 5A [Source:MGI Symbol;Acc:MGI:98958]
ENSMUSG00000028329	435.112	381.011	398.386	431.664	274.89	288.76	265.664	245.377	268.673	411.543	0.613895	3.59403e-07	Xpa	xeroderma pigmentosum, complementation group A [Source:MGI Symbol;Acc:MGI:99135]
ENSMUSG00000114995	105.18	67.2372	109.032	93.5908	213.18	194.047	191.192	162.4	190.205	93.7599	-1.01378	3.62115e-07	Gm49284	predicted gene, 49284 [Source:MGI Symbol;Acc:MGI:6118771]
ENSMUSG00000036503	4801.73	6173.22	5589.98	5326.08	3423.97	3265.68	3457.21	4131.11	3569.49	5472.75	0.616838	3.62969e-07	Rnf13	ring finger protein 13 [Source:MGI Symbol;Acc:MGI:1346341]
ENSMUSG00000085028	131.752	98.0543	95.4029	111.736	323.51	281.83	263.516	161.214	257.517	109.236	-1.23917	3.74451e-07	Slc2a4rg-ps	Slc2a4 regulator, pseudogene [Source:MGI Symbol;Acc:MGI:3651388]
ENSMUSG00000038866	400.79	308.171	326.047	304.648	564.74	603.701	627.282	475.345	567.767	334.914	-0.763838	3.75799e-07	Zcchc2	zinc finger, CCHC domain containing 2 [Source:MGI Symbol;Acc:MGI:2444114]
ENSMUSG00000034994	64492.9	71992.9	69631.6	67287	51915	53118	55774.4	51099	52976.6	68351.1	0.367555	3.85048e-07	Eef2	eukaryotic translation elongation factor 2 [Source:MGI Symbol;Acc:MGI:95288]
ENSMUSG00000026315	45.3934	35.0194	45.0805	41.0654	85.085	97.7934	91.6576	98.388	93.231	41.6397	-1.15429	3.85731e-07	Serpinb8	serine (or cysteine) peptidase inhibitor, clade B, member 8 [Source:MGI Symbol;Acc:MGI:894657]
ENSMUSG00000013736	1328.59	1542.25	1532.74	1567.17	903.211	923.262	1006.8	1137.98	992.814	1492.69	0.589792	3.85836e-07	Trnt1	tRNA nucleotidyl transferase, CCA-adding, 1 [Source:MGI Symbol;Acc:MGI:1917297]
ENSMUSG00000003992	1185.76	1379.76	1159.51	1178.48	806.905	878.6	777.657	902.088	841.313	1225.88	0.542883	3.86216e-07	Ssbp2	single-stranded DNA binding protein 2 [Source:MGI Symbol;Acc:MGI:1914220]
ENSMUSG00000040219	1459.23	1518.44	1489.75	1513.69	1071.51	1081.89	1181.52	968.47	1075.85	1495.28	0.472586	3.86547e-07	Ttc12	tetratricopeptide repeat domain 12 [Source:MGI Symbol;Acc:MGI:2444588]
ENSMUSG00000101599	55.3578	46.2256	51.3708	66.8506	125.29	130.905	109.559	107.871	118.406	54.9512	-1.09868	3.87443e-07	Gm20342	predicted gene, 20342 [Source:MGI Symbol;Acc:MGI:5012527]
ENSMUSG00000034320	701.937	1129.03	655.24	769.737	403.92	423.515	376.655	462.305	416.599	813.985	0.965619	3.88392e-07	Slc26a2	solute carrier family 26 (sulfate transporter), member 2 [Source:MGI Symbol;Acc:MGI:892977]
ENSMUSG00000111080	664.293	683.579	721.288	610.25	1022.89	1078.04	891.513	960.173	988.153	669.853	-0.561706	3.95548e-07	Gm20300	predicted gene, 20300 [Source:MGI Symbol;Acc:MGI:5012485]
ENSMUSG00000020661	1308.66	1402.18	1437.33	1419.14	2042.04	2186.88	1841.03	1820.77	1972.68	1391.83	-0.503612	3.97073e-07	Dnmt3a	DNA methyltransferase 3A [Source:MGI Symbol;Acc:MGI:1261827]
ENSMUSG00000030084	834.795	825.057	809.352	730.581	1337.05	1211.25	1212.31	1031.3	1197.98	799.947	-0.584655	3.98164e-07	Plxna1	plexin A1 [Source:MGI Symbol;Acc:MGI:107685]
ENSMUSG00000038256	1027.44	623.345	734.917	767.827	1582.96	1933.54	1593.98	1185.4	1573.97	788.382	-0.997435	4.05597e-07	Bcl9	B cell CLL/lymphoma 9 [Source:MGI Symbol;Acc:MGI:1924828]
ENSMUSG00000037169	23.2503	25.214	23.0644	13.3701	70.125	94.7133	46.5449	96.0173	76.8501	21.2247	-1.8645	4.05841e-07	Mycn	v-myc avian myelocytomatosis viral related oncogene, neuroblastoma derived [Source:MGI Symbol;Acc:MGI:97357]
ENSMUSG00000022098	1091.66	808.248	875.401	957.873	1736.3	1691.75	1789.47	1245.85	1615.84	933.294	-0.792145	4.08527e-07	Bmp1	bone morphogenetic protein 1 [Source:MGI Symbol;Acc:MGI:88176]
ENSMUSG00000025969	1039.62	777.431	822.981	822.262	2063.55	1638.62	1410.67	1296.83	1602.41	865.573	-0.888433	4.09997e-07	Nrp2	neuropilin 2 [Source:MGI Symbol;Acc:MGI:1100492]
ENSMUSG00000086607	66.4293	82.6458	56.6127	57.3005	30.855	16.9406	13.6054	13.0394	18.6101	65.7471	1.81664	4.1133e-07	4930511M06Rik	RIKEN cDNA 4930511M06 gene [Source:MGI Symbol;Acc:MGI:1922334]
ENSMUSG00000022488	170.502	109.261	117.419	129.881	265.54	255.649	514.142	318.872	338.551	131.766	-1.36131	4.30836e-07	Nckap1l	NCK associated protein 1 like [Source:MGI Symbol;Acc:MGI:1926063]
ENSMUSG00000022797	387.504	495.875	454.999	472.729	842.435	1150.42	822.77	2085.12	1225.19	452.777	-1.43518	4.37613e-07	Tfrc	transferrin receptor [Source:MGI Symbol;Acc:MGI:98822]
ENSMUSG00000039936	163.859	127.471	95.4029	123.196	271.15	274.9	362.334	218.113	281.624	127.482	-1.1486	4.41858e-07	Pik3cd	phosphatidylinositol-4,5-bisphosphate 3-kinase catalytic subunit delta [Source:MGI Symbol;Acc:MGI:1098211]
ENSMUSG00000024787	275.682	282.957	300.886	255.942	437.58	405.804	501.969	417.26	440.653	278.867	-0.663122	4.46641e-07	Snx15	sorting nexin 15 [Source:MGI Symbol;Acc:MGI:1916274]
ENSMUSG00000043496	158.323	130.272	121.613	106.006	327.25	229.468	239.169	240.636	259.131	129.053	-1.0076	4.55936e-07	Tril	TLR4 interactor with leucine-rich repeats [Source:MGI Symbol;Acc:MGI:1914123]
ENSMUSG00000055172	343.218	291.361	351.209	278.862	564.74	568.28	485.499	795.402	603.48	316.163	-0.92918	4.59019e-07	C1ra	complement component 1, r subcomponent A [Source:MGI Symbol;Acc:MGI:1355313]
ENSMUSG00000039220	1001.98	1448.4	1037.9	1258.7	704.055	631.422	726.816	487.199	637.373	1186.74	0.894078	4.62215e-07	Ppp1r10	protein phosphatase 1, regulatory subunit 10 [Source:MGI Symbol;Acc:MGI:1289273]
ENSMUSG00000066551	5325.42	5597.5	5258.69	5814.09	4010.22	4061.89	4372.35	4344.48	4197.24	5498.93	0.38981	4.62267e-07	Hmgb1	high mobility group box 1 [Source:MGI Symbol;Acc:MGI:96113]
ENSMUSG00000108494	221.431	329.182	261.048	243.527	158.015	137.835	140.351	116.169	138.092	263.797	0.925644	4.67006e-07	Gm45203	predicted gene 45203 [Source:MGI Symbol;Acc:MGI:5753779]
ENSMUSG00000078122	9.9644	15.4085	16.7741	31.5153	67.32	58.522	159.685	85.3487	92.7189	18.4156	-2.31989	4.75077e-07	F630028O10Rik	RIKEN cDNA F630028O10 gene [Source:MGI Symbol;Acc:MGI:3641813]
ENSMUSG00000027167	347.647	407.626	388.95	361.948	173.91	209.447	243.465	247.748	218.643	376.543	0.783857	4.75557e-07	Elp4	elongator acetyltransferase complex subunit 4 [Source:MGI Symbol;Acc:MGI:1925016]
ENSMUSG00000034641	54.2506	92.4512	92.2578	69.7156	162.69	141.685	196.205	208.63	177.302	77.1688	-1.20296	4.76223e-07	Cd300ld	CD300 molecule like family member d [Source:MGI Symbol;Acc:MGI:2442358]
ENSMUSG00000002980	6036.21	5831.43	6229.5	5992.68	8218.65	8234.67	8712.48	7262.93	8107.18	6022.45	-0.429089	4.8122e-07	Bcam	basal cell adhesion molecule [Source:MGI Symbol;Acc:MGI:1929940]
ENSMUSG00000026603	2661.6	3064.9	2764.59	2632.96	2184.16	1922.76	1873.97	1820.77	1950.41	2781.01	0.511103	4.84976e-07	Smyd2	SET and MYND domain containing 2 [Source:MGI Symbol;Acc:MGI:1915889]
ENSMUSG00000031749	814.867	792.839	858.626	763.052	1079.93	1068.03	1082.71	1129.68	1090.09	807.346	-0.432369	4.87895e-07	St3gal2	ST3 beta-galactoside alpha-2,3-sialyltransferase 2 [Source:MGI Symbol;Acc:MGI:99427]
ENSMUSG00000052934	9938.94	8305.2	7705.62	9976.97	5337.92	5616.57	6103.82	4183.27	5310.4	8981.68	0.757876	4.94305e-07	Fbxo31	F-box protein 31 [Source:MGI Symbol;Acc:MGI:1354708]
ENSMUSG00000030872	1935.31	2008.71	1888.14	1878.5	1500.68	1500.78	1437.88	1320.53	1439.97	1927.67	0.419026	4.97661e-07	Gga2	golgi associated, gamma adaptin ear containing, ARF binding protein 2 [Source:MGI Symbol;Acc:MGI:1921355]
ENSMUSG00000004044	6383.86	6093.38	5940.14	5191.43	9149.92	8804.49	9934.82	7623.3	8878.13	5902.2	-0.58938	4.97882e-07	Cavin1	caveolae associated 1 [Source:MGI Symbol;Acc:MGI:1277968]
ENSMUSG00000097589	193.752	236.731	243.225	221.562	358.105	329.571	372.359	357.99	354.506	223.818	-0.664559	4.97882e-07	Dleu2	deleted in lymphocytic leukemia, 2 [Source:MGI Symbol;Acc:MGI:1934030]
ENSMUSG00000020485	964.333	1030.97	1137.5	1105.9	710.6	602.931	711.062	779.992	701.146	1059.67	0.598555	4.98595e-07	Supt4a	suppressor of Ty 4A [Source:MGI Symbol;Acc:MGI:107416]
ENSMUSG00000026922	831.474	1011.36	922.578	846.137	1380.06	1419.93	1214.46	1627.55	1410.5	902.887	-0.643522	5.00762e-07	Agpat2	1-acylglycerol-3-phosphate O-acyltransferase 2 (lysophosphatidic acid acyltransferase, beta) [Source:MGI Symbol;Acc:MGI:1914762]
ENSMUSG00000031438	3121.07	3670.03	3398.86	4112.27	2457.18	2447.14	2340.85	2535.57	2445.19	3575.56	0.548643	5.02277e-07	Rnf128	ring finger protein 128 [Source:MGI Symbol;Acc:MGI:1914139]
ENSMUSG00000071648	727.401	806.847	941.449	1048.6	578.765	492.047	503.401	544.098	529.578	881.074	0.73698	5.0333e-07	Rom1	rod outer segment membrane protein 1 [Source:MGI Symbol;Acc:MGI:97998]
ENSMUSG00000047735	200.395	348.793	322.902	251.167	586.245	475.877	529.179	605.738	549.26	280.814	-0.969793	5.03477e-07	Samd9l	sterile alpha motif domain containing 9-like [Source:MGI Symbol;Acc:MGI:1343184]
ENSMUSG00000027272	1525.66	2346.3	2248.78	2271.96	961.181	1017.21	1069.1	1408.25	1113.93	2098.18	0.914443	5.0617e-07	Ubr1	ubiquitin protein ligase E3 component n-recognin 1 [Source:MGI Symbol;Acc:MGI:1277977]
ENSMUSG00000071172	4041.12	4877.5	4682.08	4955.54	3225.75	3118.61	3533.11	3211.24	3272.18	4639.06	0.503343	5.11612e-07	Srsf3	serine/arginine-rich splicing factor 3 [Source:MGI Symbol;Acc:MGI:98285]
ENSMUSG00000032640	236.931	245.136	222.257	220.607	316.03	395.794	383.816	376.957	368.149	231.233	-0.674811	5.11799e-07	Chsy1	chondroitin sulfate synthase 1 [Source:MGI Symbol;Acc:MGI:2681120]
ENSMUSG00000086629	89.6796	92.4512	106.935	88.8158	31.79	41.5814	45.1127	48.6013	41.7714	94.4704	1.18078	5.18035e-07	2810403D21Rik	RIKEN cDNA 2810403D21 gene [Source:MGI Symbol;Acc:MGI:1917214]
ENSMUSG00000042284	1093.87	1180.85	1214.03	975.064	1942.93	1768.75	1530.25	1613.33	1713.82	1115.95	-0.619679	5.21844e-07	Itga1	integrin alpha 1 [Source:MGI Symbol;Acc:MGI:96599]
ENSMUSG00000034685	62.0007	75.6419	55.5643	63.9856	185.13	107.804	158.253	139.877	147.766	64.2981	-1.20568	5.26384e-07	Fam171a2	family with sequence similarity 171, member A2 [Source:MGI Symbol;Acc:MGI:2448496]
ENSMUSG00000079184	1122.66	1311.13	1250.72	1270.16	862.07	890.921	902.971	941.206	899.292	1238.67	0.462092	5.26806e-07	Mphosph8	M-phase phosphoprotein 8 [Source:MGI Symbol;Acc:MGI:1922589]
ENSMUSG00000020961	141.716	120.467	137.338	93.5908	226.27	258.729	207.662	245.377	234.51	123.278	-0.929013	5.28197e-07	Ston2	stonin 2 [Source:MGI Symbol;Acc:MGI:1918272]
ENSMUSG00000039883	38.7504	16.8093	18.8709	22.9202	66.385	124.744	64.4467	139.877	98.8633	24.3377	-2.01151	5.28197e-07	Lrrc17	leucine rich repeat containing 17 [Source:MGI Symbol;Acc:MGI:1921761]
ENSMUSG00000028527	822.617	1150.04	971.852	811.757	1718.53	1609.36	1339.78	1827.88	1623.89	939.066	-0.790946	5.39747e-07	Ak4	adenylate kinase 4 [Source:MGI Symbol;Acc:MGI:87979]
ENSMUSG00000025608	3875.04	2773.54	2940.72	2553.69	6307.51	6103.23	6544.21	4172.6	5781.89	3035.75	-0.929739	5.4181e-07	Podxl	podocalyxin-like [Source:MGI Symbol;Acc:MGI:1351317]
ENSMUSG00000070808	370.897	232.529	284.112	287.458	616.165	681.474	609.38	427.929	583.737	293.749	-0.990794	5.43285e-07	Bicra	BRD4 interacting chromatin remodeling complex associated protein [Source:MGI Symbol;Acc:MGI:2154263]
ENSMUSG00000041712	1525.66	1708.95	1585.16	1574.81	1179.04	1140.41	1253.13	1206.74	1194.83	1598.64	0.419076	5.43666e-07	Ubr7	ubiquitin protein ligase E3 component n-recognin 7 (putative) [Source:MGI Symbol;Acc:MGI:1913872]
ENSMUSG00000030263	38.7504	25.214	45.0805	35.3353	77.605	84.7029	96.6701	100.759	89.9342	36.0951	-1.30115	5.45944e-07	Lrmp	lymphoid-restricted membrane protein [Source:MGI Symbol;Acc:MGI:108424]
ENSMUSG00000034480	897.903	1088.4	1097.66	900.573	591.855	693.794	669.53	655.525	652.676	996.134	0.608153	5.48451e-07	Diaph2	diaphanous related formin 2 [Source:MGI Symbol;Acc:MGI:1858500]
ENSMUSG00000026447	1120.44	906.302	1109.19	1080.11	1668.98	1664.8	1533.12	1403.51	1567.6	1054.01	-0.571854	5.519e-07	Pik3c2b	phosphatidylinositol-4-phosphate 3-kinase catalytic subunit type 2 beta [Source:MGI Symbol;Acc:MGI:2685045]
ENSMUSG00000028629	32.1075	30.8171	28.3064	44.8854	90.6951	110.114	82.3486	73.4947	89.163	34.0291	-1.38507	5.552e-07	Exo5	exonuclease 5 [Source:MGI Symbol;Acc:MGI:1920422]
ENSMUSG00000047824	380.862	379.61	373.225	402.059	564.74	531.318	646.616	550.025	573.175	383.939	-0.579006	5.56101e-07	Pygo2	pygopus 2 [Source:MGI Symbol;Acc:MGI:1916161]
ENSMUSG00000014837	49.822	47.6264	41.9354	45.8404	96.3051	95.4833	97.3862	99.5734	97.187	46.306	-1.07117	5.64091e-07	4931428F04Rik	RIKEN cDNA 4931428F04 gene [Source:MGI Symbol;Acc:MGI:1921606]
ENSMUSG00000062515	11923	13290.6	13511.6	11429.5	19147.9	18320.5	17108.5	16266	17710.7	12538.7	-0.498384	5.66284e-07	Fabp4	fatty acid binding protein 4, adipocyte [Source:MGI Symbol;Acc:MGI:88038]
ENSMUSG00000023206	633.293	466.458	547.256	547.22	878.901	1011.82	942.355	759.84	898.228	548.557	-0.711564	5.78669e-07	Il15ra	interleukin 15 receptor, alpha chain [Source:MGI Symbol;Acc:MGI:104644]
ENSMUSG00000022357	411.862	430.038	444.515	393.463	794.75	875.52	688.864	560.693	729.957	419.97	-0.800013	5.80547e-07	Klhl38	kelch-like 38 [Source:MGI Symbol;Acc:MGI:3045310]
ENSMUSG00000020642	408.54	280.155	317.66	256.897	776.05	546.719	629.43	531.058	620.814	315.813	-0.975329	5.84618e-07	Rnf144a	ring finger protein 144A [Source:MGI Symbol;Acc:MGI:1344401]
ENSMUSG00000021373	6278.68	7397.5	7019.98	6850.27	5261.25	5059.85	4920.15	5358	5149.81	6886.61	0.419359	5.8486e-07	Cap2	CAP, adenylate cyclase-associated protein, 2 (yeast) [Source:MGI Symbol;Acc:MGI:1914502]
ENSMUSG00000021400	767.259	843.267	810.401	735.356	1097.69	1052.63	1130.68	1045.52	1081.63	789.071	-0.457563	5.8486e-07	Wrnip1	Werner helicase interacting protein 1 [Source:MGI Symbol;Acc:MGI:1926153]
ENSMUSG00000052921	1434.87	1080	1049.43	1056.24	2507.67	2262.34	2179.73	1569.47	2129.8	1155.14	-0.88321	5.8712e-07	Arhgef15	Rho guanine nucleotide exchange factor (GEF) 15 [Source:MGI Symbol;Acc:MGI:3045246]
ENSMUSG00000056596	151.68	151.284	197.096	138.476	67.32	76.2326	55.8538	93.6465	73.2632	159.634	1.13667	5.87459e-07	Trnp1	TMF1-regulated nuclear protein 1 [Source:MGI Symbol;Acc:MGI:1916789]
ENSMUSG00000024735	11672.7	12748.5	12770.4	12006.4	9727.75	9888.68	9006.79	8921.31	9386.13	12299.5	0.389824	6.01075e-07	Prpf19	pre-mRNA processing factor 19 [Source:MGI Symbol;Acc:MGI:106247]
ENSMUSG00000002329	2224.28	2190.81	2148.14	2252.86	1729.75	1655.56	1702.11	1801.81	1722.31	2204.02	0.356983	6.14072e-07	Mdp1	magnesium-dependent phosphatase 1 [Source:MGI Symbol;Acc:MGI:1915131]
ENSMUSG00000116056	77.5009	43.4241	60.8063	55.3905	103.785	155.545	146.795	173.068	144.798	59.2804	-1.28013	6.18403e-07	Gm4544	predicted gene 4544 [Source:MGI Symbol;Acc:MGI:3782728]
ENSMUSG00000023087	2834.32	3387.08	2516.12	2550.83	1542.75	1746.42	1476.55	936.465	1425.55	2822.09	0.983855	6.32052e-07	Noct	nocturnin [Source:MGI Symbol;Acc:MGI:109382]
ENSMUSG00000001569	1276.55	1158.44	1139.59	1152.7	816.255	853.96	918.724	789.475	844.604	1181.82	0.482545	6.35725e-07	Nom1	nucleolar protein with MIF4G domain 1 [Source:MGI Symbol;Acc:MGI:1861749]
ENSMUSG00000040731	6816.76	7548.78	7243.28	7402.27	5419.26	5143.78	5840.31	5637.75	5510.28	7252.77	0.396367	6.37059e-07	Eif4h	eukaryotic translation initiation factor 4H [Source:MGI Symbol;Acc:MGI:1341822]
ENSMUSG00000028884	665.401	690.583	576.611	663.731	425.425	428.135	474.042	444.524	443.032	649.081	0.54897	6.3842e-07	Rpa2	replication protein A2 [Source:MGI Symbol;Acc:MGI:1339939]
ENSMUSG00000042502	1710.56	1738.36	1665.88	1718.06	1316.48	1291.33	1386.32	1257.71	1312.96	1708.22	0.378225	6.42084e-07	Cd2bp2	CD2 antigen (cytoplasmic tail) binding protein 2 [Source:MGI Symbol;Acc:MGI:1917483]
ENSMUSG00000097164	358.718	320.778	316.612	275.997	177.65	209.447	179.735	200.332	191.791	318.026	0.72894	6.45693e-07	Cep83os	centrosomal protein 83, opposite strand [Source:MGI Symbol;Acc:MGI:1914973]
ENSMUSG00000032312	384.183	327.782	400.483	287.458	664.785	565.97	762.62	535.8	632.294	349.976	-0.855044	6.55444e-07	Csk	c-src tyrosine kinase [Source:MGI Symbol;Acc:MGI:88537]
ENSMUSG00000063558	3507.47	2919.22	2641.93	4571.63	1790.53	1901.97	2005.73	1650.07	1837.07	3410.06	0.89233	6.55493e-07	Aox1	aldehyde oxidase 1 [Source:MGI Symbol;Acc:MGI:88035]
ENSMUSG00000059796	7113.47	9263.33	8745.62	8866.3	4553.45	5088.34	6338.7	5052.17	5258.16	8497.18	0.692154	6.55493e-07	Eif4a1	eukaryotic translation initiation factor 4A1 [Source:MGI Symbol;Acc:MGI:95303]
ENSMUSG00000028980	1324.16	1057.59	1223.46	1114.49	1689.55	1875.02	1865.38	1583.69	1753.41	1179.93	-0.571785	6.55493e-07	H6pd	hexose-6-phosphate dehydrogenase (glucose 1-dehydrogenase) [Source:MGI Symbol;Acc:MGI:2140356]
ENSMUSG00000019997	10043	9268.93	11701	5437.82	4090.63	3716.92	5211.59	3470.85	4122.5	9112.69	1.14414	6.62604e-07	Ctgf	connective tissue growth factor [Source:MGI Symbol;Acc:MGI:95537]
ENSMUSG00000035637	1408.3	1580.08	1592.5	1550.93	1203.35	1110.38	1101.32	1128.5	1135.89	1532.95	0.432783	6.91588e-07	Grhpr	glyoxylate reductase/hydroxypyruvate reductase [Source:MGI Symbol;Acc:MGI:1923488]
ENSMUSG00000036707	5740.6	7059.91	6732.72	6378.5	4512.31	4576.27	4844.96	4844.72	4694.57	6477.93	0.464387	7.20087e-07	Cab39	calcium binding protein 39 [Source:MGI Symbol;Acc:MGI:107438]
ENSMUSG00000049878	902.332	918.909	1054.67	1116.4	544.17	695.334	659.505	659.081	639.523	998.08	0.642786	7.27057e-07	Rlf	rearranged L-myc fusion sequence [Source:MGI Symbol;Acc:MGI:1924705]
ENSMUSG00000024909	160.538	137.276	130	109.826	209.44	276.44	307.912	248.934	260.681	134.41	-0.961808	7.41202e-07	Efemp2	epidermal growth factor-containing fibulin-like extracellular matrix protein 2 [Source:MGI Symbol;Acc:MGI:1891209]
ENSMUSG00000039515	1584.34	1797.2	1855.64	1843.17	2519.83	2250.02	2506.98	2515.41	2448.06	1770.09	-0.467366	7.42815e-07	Ptpa	protein phosphatase 2 protein activator [Source:MGI Symbol;Acc:MGI:1346006]
ENSMUSG00000023963	381.969	382.412	394.192	369.588	269.28	266.429	250.626	256.046	260.595	382.04	0.55172	7.49786e-07	Cyp39a1	cytochrome P450, family 39, subfamily a, polypeptide 1 [Source:MGI Symbol;Acc:MGI:1927096]
ENSMUSG00000020143	48.7148	71.4396	50.3224	39.1553	121.55	117.044	227.712	132.765	149.768	52.408	-1.53057	7.49786e-07	Dock2	dedicator of cyto-kinesis 2 [Source:MGI Symbol;Acc:MGI:2149010]
ENSMUSG00000025374	887.939	928.714	916.288	940.683	703.12	673.773	705.334	679.233	690.365	918.406	0.411379	7.51664e-07	Nabp2	nucleic acid binding protein 2 [Source:MGI Symbol;Acc:MGI:1917167]
ENSMUSG00000020604	164.966	131.673	122.661	122.241	44.88	75.4626	51.5574	66.3823	59.5706	135.385	1.18496	7.68277e-07	Arsg	arylsulfatase G [Source:MGI Symbol;Acc:MGI:1921258]
ENSMUSG00000041057	1169.16	1256.5	1218.22	1177.53	728.365	800.828	943.787	828.593	825.393	1205.35	0.544649	7.76024e-07	Wdr43	WD repeat domain 43 [Source:MGI Symbol;Acc:MGI:1919765]
ENSMUSG00000013160	1707.23	1629.1	1642.82	1781.09	1310.87	1192	1306.84	1142.72	1238.11	1690.06	0.4484	7.76024e-07	Atp6v0d1	ATPase, H+ transporting, lysosomal V0 subunit D1 [Source:MGI Symbol;Acc:MGI:1201778]
ENSMUSG00000020658	414.076	287.159	319.757	241.617	840.565	611.401	659.505	510.907	655.595	315.652	-1.05546	7.78207e-07	Efr3b	EFR3 homolog B [Source:MGI Symbol;Acc:MGI:2444851]
ENSMUSG00000045917	680.901	792.839	814.594	827.992	539.495	468.176	528.463	555.952	523.022	779.082	0.577132	7.78444e-07	Tmem268	transmembrane protein 268 [Source:MGI Symbol;Acc:MGI:1913920]
ENSMUSG00000029001	874.653	704.59	808.304	874.788	539.495	558.269	582.885	552.396	558.261	815.584	0.548346	7.78444e-07	Fbxo44	F-box protein 44 [Source:MGI Symbol;Acc:MGI:1354744]
ENSMUSG00000027716	210.36	166.692	182.419	155.666	416.075	291.07	312.925	307.018	331.772	178.784	-0.89131	7.88819e-07	Trpc3	transient receptor potential cation channel, subfamily C, member 3 [Source:MGI Symbol;Acc:MGI:109526]
ENSMUSG00000039105	3618.18	4220.54	3879.02	4160.97	2843.34	2775.18	2854.27	3142.49	2903.82	3969.68	0.451488	7.90828e-07	Atp6v1g1	ATPase, H+ transporting, lysosomal V1 subunit G1 [Source:MGI Symbol;Acc:MGI:1913540]
ENSMUSG00000025872	838.117	722.8	704.514	719.121	503.965	539.019	511.994	528.688	520.916	746.138	0.5185	7.96185e-07	Thoc3	THO complex 3 [Source:MGI Symbol;Acc:MGI:1920916]
ENSMUSG00000025784	815.974	879.687	906.852	753.502	1299.65	1386.05	1139.99	1666.67	1373.09	839.004	-0.709864	8.00561e-07	Clec3b	C-type lectin domain family 3, member b [Source:MGI Symbol;Acc:MGI:104540]
ENSMUSG00000032883	301.146	324.98	291.451	325.658	192.61	197.897	209.81	208.63	202.237	310.809	0.61943	8.0499e-07	Acsl3	acyl-CoA synthetase long-chain family member 3 [Source:MGI Symbol;Acc:MGI:1921455]
ENSMUSG00000048222	949.94	889.493	966.61	975.064	591.855	706.885	670.246	701.756	667.685	945.276	0.502733	8.2124e-07	Mfap1b	microfibrillar-associated protein 1B [Source:MGI Symbol;Acc:MGI:3694697]
ENSMUSG00000001783	2907.39	3188.17	3317.09	3147.71	2245.87	2083.69	2434.65	2395.69	2289.98	3140.09	0.455745	8.25885e-07	Rtcb	RNA 2',3'-cyclic phosphate and 5'-OH ligase [Source:MGI Symbol;Acc:MGI:106379]
ENSMUSG00000009927	9091.96	11045.1	9802.39	10789.7	6505.73	6381.98	7427.13	7635.15	6987.5	10182.3	0.543274	8.30769e-07	Rps25	ribosomal protein S25 [Source:MGI Symbol;Acc:MGI:1922867]
ENSMUSG00000042106	89.6796	75.6419	72.3385	43.9304	153.34	182.496	161.833	141.062	159.683	70.3976	-1.19252	8.30769e-07	Inka1	inka box actin regulator 1 [Source:MGI Symbol;Acc:MGI:1915426]
ENSMUSG00000039745	876.867	967.936	1051.53	939.728	611.49	506.678	690.296	641.3	612.441	959.015	0.647486	8.32797e-07	Htatip2	HIV-1 Tat interactive protein 2 [Source:MGI Symbol;Acc:MGI:1859271]
ENSMUSG00000038949	2032.74	2141.79	2290.72	1974	2834.92	2773.64	2722.52	2835.47	2791.64	2109.81	-0.404031	8.3621e-07	Cnst	consortin, connexin sorting protein [Source:MGI Symbol;Acc:MGI:2445141]
ENSMUSG00000028656	1280.98	1051.98	1135.4	1147.92	1753.13	1871.93	2055.14	1497.16	1794.34	1154.07	-0.637406	8.48695e-07	Cap1	CAP, adenylate cyclase-associated protein 1 (yeast) [Source:MGI Symbol;Acc:MGI:88262]
ENSMUSG00000059811	2360.46	2710.5	2617.81	2549.87	1683	1701.76	1664.16	2055.48	1776.1	2559.66	0.52831	8.49003e-07	Atl2	atlastin GTPase 2 [Source:MGI Symbol;Acc:MGI:1929492]
ENSMUSG00000091811	807.116	738.209	733.869	785.972	573.155	547.489	572.144	528.688	555.369	766.291	0.463823	8.63327e-07	Inafm1	InaF motif containing 1 [Source:MGI Symbol;Acc:MGI:1913550]
ENSMUSG00000033918	1655.2	1854.63	1619.75	1916.7	1286.56	1278.24	1266.02	1299.2	1282.51	1761.57	0.457974	8.63327e-07	Parl	presenilin associated, rhomboid-like [Source:MGI Symbol;Acc:MGI:1277152]
ENSMUSG00000037946	23.2503	30.8171	20.9677	22.9202	70.125	66.9923	145.363	66.3823	87.2157	24.4888	-1.84998	8.71204e-07	Fgd3	FYVE, RhoGEF and PH domain containing 3 [Source:MGI Symbol;Acc:MGI:1353657]
ENSMUSG00000056494	381.969	542.1	444.515	292.233	132.77	232.548	136.054	194.405	173.944	415.204	1.25376	8.83281e-07	Cngb3	cyclic nucleotide gated channel beta 3 [Source:MGI Symbol;Acc:MGI:1353562]
ENSMUSG00000000628	22035.7	32628.3	20523.2	15781.5	12228.9	12156.4	10371.6	9815.1	11143	22742.2	1.02912	8.9013e-07	Hk2	hexokinase 2 [Source:MGI Symbol;Acc:MGI:1315197]
ENSMUSG00000075254	4192.8	4256.96	4353.94	4084.57	5178.97	5731.31	5222.33	5612.86	5436.37	4222.07	-0.364683	8.9013e-07	Heg1	heart development protein with EGF-like domains 1 [Source:MGI Symbol;Acc:MGI:1924696]
ENSMUSG00000035247	6259.86	8938.35	8529.65	8634.23	4340.27	4765.7	5243.82	5470.61	4955.1	8090.52	0.707358	8.93957e-07	Hectd1	HECT domain E3 ubiquitin protein ligase 1 [Source:MGI Symbol;Acc:MGI:2384768]
ENSMUSG00000019302	4760.77	4266.76	4336.12	4491.4	3333.28	2872.2	3370.56	2638.7	3053.68	4463.76	0.547249	8.98051e-07	Atp6v0a1	ATPase, H+ transporting, lysosomal V0 subunit A1 [Source:MGI Symbol;Acc:MGI:103286]
ENSMUSG00000022742	1180.23	1386.77	1434.19	1311.23	2005.58	1706.38	1969.21	1952.35	1908.38	1328.1	-0.522926	9.00106e-07	Cpox	coproporphyrinogen oxidase [Source:MGI Symbol;Acc:MGI:104841]
ENSMUSG00000022517	11192.2	9770.41	9406.1	9584.46	7506.18	7532.4	6470.45	6968.96	7119.5	9988.3	0.488482	9.04533e-07	Mgrn1	mahogunin, ring finger 1 [Source:MGI Symbol;Acc:MGI:2447670]
ENSMUSG00000097644	27.6789	35.0194	45.0805	38.2003	110.33	75.4626	86.6451	91.2757	90.9284	36.4948	-1.30873	9.21768e-07	Gm26862	predicted gene, 26862 [Source:MGI Symbol;Acc:MGI:5477356]
ENSMUSG00000036862	362.04	285.758	263.144	230.157	681.615	594.461	489.795	454.008	554.97	285.275	-0.962143	9.27863e-07	Dchs1	dachsous cadherin related 1 [Source:MGI Symbol;Acc:MGI:2685011]
ENSMUSG00000032041	150.573	165.292	164.596	172.857	258.995	265.659	284.998	240.636	262.572	163.329	-0.688083	9.37139e-07	Tirap	toll-interleukin 1 receptor (TIR) domain-containing adaptor protein [Source:MGI Symbol;Acc:MGI:2152213]
ENSMUSG00000049922	183.788	170.895	168.79	145.161	292.655	295.69	266.38	248.934	275.915	167.158	-0.72826	9.37139e-07	Slc35c1	solute carrier family 35, member C1 [Source:MGI Symbol;Acc:MGI:2443301]
ENSMUSG00000035891	2558.64	2721.71	2559.11	2538.41	1941.06	1573.93	1988.54	1656	1789.88	2594.47	0.53481	9.38575e-07	Cerk	ceramide kinase [Source:MGI Symbol;Acc:MGI:2386052]
ENSMUSG00000018474	939.975	825.057	808.304	686.651	1224.85	1289.79	1151.45	1260.08	1231.54	814.997	-0.596335	9.39203e-07	Chd3	chromodomain helicase DNA binding protein 3 [Source:MGI Symbol;Acc:MGI:1344395]
ENSMUSG00000025007	186.002	201.712	203.386	171.902	299.2	288.76	321.518	289.237	299.679	190.75	-0.656798	9.46526e-07	Aldh18a1	aldehyde dehydrogenase 18 family, member A1 [Source:MGI Symbol;Acc:MGI:1888908]
ENSMUSG00000021200	23647.7	22478.3	22021.3	23238.2	18871.1	16152.9	15183.7	15687.6	16473.8	22846.4	0.471829	9.4797e-07	Asb2	ankyrin repeat and SOCS box-containing 2 [Source:MGI Symbol;Acc:MGI:1929743]
ENSMUSG00000020176	1862.24	1956.88	1864.03	1382.85	3134.12	3368.1	3358.39	2377.91	3059.63	1766.5	-0.7936	9.56105e-07	Grb10	growth factor receptor bound protein 10 [Source:MGI Symbol;Acc:MGI:103232]
ENSMUSG00000028089	828.152	785.835	809.352	901.528	589.05	628.342	602.219	584.401	601.003	831.217	0.468297	9.5872e-07	Chd1l	chromodomain helicase DNA binding protein 1-like [Source:MGI Symbol;Acc:MGI:1915308]
ENSMUSG00000039480	477.184	530.894	494.837	526.21	311.355	349.592	349.445	372.215	345.652	507.281	0.554186	9.86255e-07	Nt5dc1	5'-nucleotidase domain containing 1 [Source:MGI Symbol;Acc:MGI:2442446]
ENSMUSG00000077928	293.396	99.4551	176.128	170.946	1015.41	1305.97	728.964	508.536	889.719	184.982	-2.26496	9.90844e-07	Mir208b	microRNA 208b [Source:MGI Symbol;Acc:MGI:3718461]
ENSMUSG00000029388	1098.3	1119.22	1054.67	1023.77	801.295	788.507	833.511	732.576	788.973	1073.99	0.441798	9.92357e-07	Eif2b1	eukaryotic translation initiation factor 2B, subunit 1 (alpha) [Source:MGI Symbol;Acc:MGI:2384802]
ENSMUSG00000025220	5044.2	5561.08	5869.9	5728.14	4276.69	3808.55	4257.78	4118.07	4115.27	5550.83	0.431866	1.00283e-06	Mgea5	meningioma expressed antigen 5 (hyaluronidase) [Source:MGI Symbol;Acc:MGI:1932139]
ENSMUSG00000036905	974.297	1098.21	1082.98	956.918	1484.78	1357.56	1610.45	1819.59	1568.09	1028.1	-0.608721	1.01084e-06	C1qb	complement component 1, q subcomponent, beta polypeptide [Source:MGI Symbol;Acc:MGI:88224]
ENSMUSG00000020462	742.901	727.003	703.466	665.641	484.33	412.734	407.447	535.8	460.078	709.753	0.629622	1.02505e-06	Cfap36	cilia and flagella associated protein 36 [Source:MGI Symbol;Acc:MGI:1913994]
ENSMUSG00000034522	523.685	312.373	330.241	326.613	774.18	702.264	689.58	651.969	704.499	373.228	-0.916097	1.03096e-06	Zfp395	zinc finger protein 395 [Source:MGI Symbol;Acc:MGI:2682318]
ENSMUSG00000022191	2396.99	2522.8	2381.93	2206.07	1749.39	1885.8	1794.48	1682.08	1777.94	2376.95	0.417263	1.03487e-06	Drosha	drosha, ribonuclease type III [Source:MGI Symbol;Acc:MGI:1261425]
ENSMUSG00000027210	1122.66	1122.02	1071.45	1230.05	743.325	806.988	779.09	890.234	804.909	1136.54	0.499983	1.04506e-06	Meis2	Meis homeobox 2 [Source:MGI Symbol;Acc:MGI:108564]
ENSMUSG00000019989	112.93	105.058	96.4513	93.5908	176.715	197.897	161.833	189.664	181.527	102.008	-0.83291	1.05779e-06	Enpp3	ectonucleotide pyrophosphatase/phosphodiesterase 3 [Source:MGI Symbol;Acc:MGI:2143702]
ENSMUSG00000097166	29.8932	43.4241	51.3708	57.3005	10.285	16.1706	7.87682	4.74159	9.7685	45.4971	2.19063	1.06082e-06	9330179D12Rik	RIKEN cDNA 9330179D12 gene [Source:MGI Symbol;Acc:MGI:1924808]
ENSMUSG00000028037	40.9648	44.8248	41.9354	21.9652	148.665	114.734	82.3486	90.0903	108.959	37.4225	-1.55372	1.06151e-06	Ifi44	interferon-induced protein 44 [Source:MGI Symbol;Acc:MGI:2443016]
ENSMUSG00000015214	1282.09	1447	1428.95	1545.2	975.206	964.843	1030.43	1092.94	1015.85	1425.81	0.490407	1.07367e-06	Mtmr1	myotubularin related protein 1 [Source:MGI Symbol;Acc:MGI:1858271]
ENSMUSG00000063015	5762.74	5939.29	6209.58	5704.26	4376.74	4490.8	4164.69	4850.65	4470.72	5903.97	0.401666	1.09574e-06	Ccni	cyclin I [Source:MGI Symbol;Acc:MGI:1341077]
ENSMUSG00000034145	25.4646	35.0194	34.5967	26.7402	6.545	6.16021	7.87682	3.55619	6.03456	30.4552	2.29045	1.12362e-06	Tmem63c	transmembrane protein 63c [Source:MGI Symbol;Acc:MGI:2444386]
ENSMUSG00000059897	387.504	414.63	512.66	423.069	246.84	281.83	237.021	292.793	264.621	434.466	0.719187	1.12609e-06	Zfp930	zinc finger protein 930 [Source:MGI Symbol;Acc:MGI:2675306]
ENSMUSG00000069920	43.1791	71.4396	61.8546	63.9856	133.705	107.804	132.474	162.4	134.096	60.1147	-1.1561	1.15033e-06	B3gnt9	UDP-GlcNAc:betaGal beta-1,3-N-acetylglucosaminyltransferase 9 [Source:MGI Symbol;Acc:MGI:2142841]
ENSMUSG00000114005	404.112	379.61	339.676	367.678	172.975	250.259	226.28	232.338	220.463	372.769	0.755735	1.15134e-06	Gm24474	predicted gene, 24474 [Source:MGI Symbol;Acc:MGI:5454251]
ENSMUSG00000034040	536.97	536.497	489.595	514.75	282.37	355.752	359.47	256.046	313.41	519.453	0.721991	1.16135e-06	Galnt17	polypeptide N-acetylgalactosaminyltransferase 17 [Source:MGI Symbol;Acc:MGI:2137594]
ENSMUSG00000074030	440.648	437.042	479.111	460.314	691.9	660.683	665.95	584.401	650.734	454.279	-0.519256	1.16135e-06	Exoc8	exocyst complex component 8 [Source:MGI Symbol;Acc:MGI:2142527]
ENSMUSG00000074521	385.29	728.404	876.449	906.303	248.71	271.049	267.812	382.884	292.614	724.111	1.30992	1.16678e-06	Gm14327	predicted gene 14327 [Source:MGI Symbol;Acc:MGI:3652188]
ENSMUSG00000021423	44.2862	58.8326	24.1128	33.4253	90.6951	99.3334	116.004	117.354	105.847	40.1642	-1.41817	1.16678e-06	Ly86	lymphocyte antigen 86 [Source:MGI Symbol;Acc:MGI:1321404]
ENSMUSG00000051506	68.6436	50.4279	39.8386	29.6053	99.1101	144.765	197.637	123.281	141.198	47.1289	-1.59439	1.17412e-06	Wdfy4	WD repeat and FYVE domain containing 4 [Source:MGI Symbol;Acc:MGI:3584510]
ENSMUSG00000056698	544.721	459.455	501.127	575.87	824.67	862.43	884.353	683.975	813.857	520.293	-0.645413	1.1788e-06	Elmod3	ELMO/CED-12 domain containing 3 [Source:MGI Symbol;Acc:MGI:2445168]
ENSMUSG00000009030	512.613	483.268	475.966	537.67	706.86	668.383	711.779	708.868	698.973	502.379	-0.47432	1.18168e-06	Pdcl	phosducin-like [Source:MGI Symbol;Acc:MGI:1914716]
ENSMUSG00000026255	32.1075	39.2217	16.7741	28.6503	74.8	78.5427	70.8914	91.2757	78.8775	29.1884	-1.44729	1.18231e-06	Efhd1	EF hand domain containing 1 [Source:MGI Symbol;Acc:MGI:1921607]
ENSMUSG00000005667	38.7504	33.6186	48.2257	40.1104	129.03	80.8528	118.868	81.7925	102.636	40.1763	-1.34934	1.18811e-06	Mthfd2	methylenetetrahydrofolate dehydrogenase (NAD+ dependent), methenyltetrahydrofolate cyclohydrolase [Source:MGI Symbol;Acc:MGI:1338850]
ENSMUSG00000037703	494.899	418.832	388.95	452.674	263.67	254.109	295.023	301.091	278.473	438.839	0.658544	1.21537e-06	Lzts3	leucine zipper, putative tumor suppressor family member 3 [Source:MGI Symbol;Acc:MGI:2656976]
ENSMUSG00000026478	5002.13	4268.16	4568.86	3877.33	7253.73	7817.31	7020.4	5700.58	6948.01	4429.12	-0.649866	1.21537e-06	Lamc1	laminin, gamma 1 [Source:MGI Symbol;Acc:MGI:99914]
ENSMUSG00000042589	277.896	264.747	235.886	218.697	618.97	693.794	365.198	440.968	529.733	249.307	-1.08918	1.22047e-06	Cux2	cut-like homeobox 2 [Source:MGI Symbol;Acc:MGI:107321]
ENSMUSG00000037355	682.008	647.159	594.434	697.156	441.32	440.455	483.351	385.254	437.595	655.189	0.578909	1.22066e-06	Uvssa	UV stimulated scaffold protein A [Source:MGI Symbol;Acc:MGI:1918351]
ENSMUSG00000040537	781.652	865.68	836.61	1126.91	477.785	586.76	575.724	521.575	540.461	902.713	0.739745	1.22122e-06	Adam22	a disintegrin and metallopeptidase domain 22 [Source:MGI Symbol;Acc:MGI:1340046]
ENSMUSG00000035559	561.328	530.894	551.45	625.53	407.66	378.083	368.779	410.148	391.167	567.301	0.541223	1.22558e-06	Mpv17l2	MPV17 mitochondrial membrane protein-like 2 [Source:MGI Symbol;Acc:MGI:2681846]
ENSMUSG00000044811	12.1787	14.0078	23.0644	10.5051	48.62	50.0517	113.856	55.7137	67.0604	14.939	-2.17262	1.27348e-06	Cd300c2	CD300C molecule 2 [Source:MGI Symbol;Acc:MGI:2153249]
ENSMUSG00000030122	2425.78	2309.88	2538.14	2587.12	3482.88	3113.99	3254.56	3743.49	3398.73	2465.23	-0.461994	1.27405e-06	Ptms	parathymosin [Source:MGI Symbol;Acc:MGI:1916452]
ENSMUSG00000024222	5515.85	5118.44	5042.73	5969.76	2323.48	2748.23	2742.57	1020.63	2208.72	5411.69	1.29224	1.27926e-06	Fkbp5	FK506 binding protein 5 [Source:MGI Symbol;Acc:MGI:104670]
ENSMUSG00000022092	1200.16	1487.62	1416.37	1290.22	863.005	919.412	1002.5	941.206	931.532	1348.59	0.532335	1.2799e-06	Ppp3cc	protein phosphatase 3, catalytic subunit, gamma isoform [Source:MGI Symbol;Acc:MGI:107162]
ENSMUSG00000049969	257.967	226.926	255.806	233.022	374	378.853	426.065	340.209	379.782	243.43	-0.644007	1.30287e-06	Plekhf2	pleckstrin homology domain containing, family F (with FYVE domain) member 2 [Source:MGI Symbol;Acc:MGI:1919051]
ENSMUSG00000038056	2332.78	2709.1	2768.78	2651.1	1868.13	1935.08	1998.57	1957.09	1939.72	2615.44	0.43098	1.31144e-06	Kmt2c	lysine (K)-specific methyltransferase 2C [Source:MGI Symbol;Acc:MGI:2444959]
ENSMUSG00000031734	839.224	788.637	751.691	772.602	976.141	1245.13	1215.9	1220.96	1164.53	788.038	-0.563944	1.3161e-06	Irx3	Iroquois related homeobox 3 [Source:MGI Symbol;Acc:MGI:1197522]
ENSMUSG00000029622	1106.05	1234.08	1308.38	1216.68	1686.74	1773.37	2486.21	2027.03	1993.34	1216.3	-0.713026	1.31692e-06	Arpc1b	actin related protein 2/3 complex, subunit 1B [Source:MGI Symbol;Acc:MGI:1343142]
ENSMUSG00000022204	879.082	1039.38	890.078	1006.58	660.11	548.259	647.332	688.716	636.104	953.779	0.585588	1.32283e-06	Ngdn	neuroguidin, EIF4E binding protein [Source:MGI Symbol;Acc:MGI:1916216]
ENSMUSG00000026201	489.363	570.116	626.934	540.535	834.955	942.513	784.102	807.256	842.207	556.737	-0.597916	1.33363e-06	Stk16	serine/threonine kinase 16 [Source:MGI Symbol;Acc:MGI:1313271]
ENSMUSG00000028673	1129.3	1131.83	1090.32	1129.77	788.205	836.249	888.649	855.857	842.24	1120.3	0.410851	1.34158e-06	Fuca1	fucosidase, alpha-L- 1, tissue [Source:MGI Symbol;Acc:MGI:95593]
ENSMUSG00000020407	81.9295	96.6535	63.9514	63.9856	145.86	163.246	140.351	150.546	150.001	76.63	-0.982728	1.34246e-06	Upp1	uridine phosphorylase 1 [Source:MGI Symbol;Acc:MGI:1097668]
ENSMUSG00000017344	554.685	423.034	427.741	381.048	878.901	933.272	778.374	629.446	804.998	446.627	-0.851608	1.35009e-06	Vtn	vitronectin [Source:MGI Symbol;Acc:MGI:98940]
ENSMUSG00000100510	4560.37	5881.86	5030.15	7694.5	3112.62	2749.77	3757.25	2743.01	3090.66	5791.72	0.905922	1.38516e-06	AV026068	expressed sequence AV026068 [Source:MGI Symbol;Acc:MGI:2142734]
ENSMUSG00000022364	120.68	121.868	133.145	99.3209	252.45	200.207	193.34	215.742	215.435	118.753	-0.859511	1.38516e-06	Tbc1d31	TBC1 domain family, member 31 [Source:MGI Symbol;Acc:MGI:2684931]
ENSMUSG00000021669	2255.28	2851.98	2908.22	2773.34	1775.57	1658.64	1774.43	2012.81	1805.36	2697.2	0.579884	1.38792e-06	Col4a3bp	collagen, type IV, alpha 3 (Goodpasture antigen) binding protein [Source:MGI Symbol;Acc:MGI:1915268]
ENSMUSG00000063275	474.97	592.528	696.127	631.261	943.416	1026.45	879.34	1122.57	992.943	598.721	-0.72806	1.38792e-06	Hacd1	3-hydroxyacyl-CoA dehydratase 1 [Source:MGI Symbol;Acc:MGI:1353592]
ENSMUSG00000025492	1213.44	1136.03	1110.24	929.223	1547.43	1540.82	1924.81	1887.15	1725.05	1097.23	-0.653284	1.38966e-06	Ifitm3	interferon induced transmembrane protein 3 [Source:MGI Symbol;Acc:MGI:1913391]
ENSMUSG00000032194	5442.78	5929.48	6515.71	5489.39	4560.93	4093.46	4191.9	3930.78	4194.27	5844.34	0.478439	1.41541e-06	Kank2	KN motif and ankyrin repeat domains 2 [Source:MGI Symbol;Acc:MGI:2384568]
ENSMUSG00000032089	66.4293	79.8442	92.2578	81.1757	153.34	160.936	216.971	138.692	167.484	79.9268	-1.07223	1.41687e-06	Il10ra	interleukin 10 receptor, alpha [Source:MGI Symbol;Acc:MGI:96538]
ENSMUSG00000059669	457.255	452.451	473.87	487.054	352.495	307.241	306.48	325.985	323.05	467.657	0.537482	1.42961e-06	Taf1b	TATA-box binding protein associated factor, RNA polymerase I, B [Source:MGI Symbol;Acc:MGI:109577]
ENSMUSG00000029464	815.974	820.855	817.739	836.587	619.905	623.722	618.689	634.188	624.126	822.789	0.399537	1.43069e-06	Gpn3	GPN-loop GTPase 3 [Source:MGI Symbol;Acc:MGI:1289326]
ENSMUSG00000112041	31.0004	70.0388	71.2901	59.2105	19.635	13.0905	17.1858	9.48319	14.8486	57.8849	1.94521	1.4362e-06	9530020I12Rik	RIKEN cDNA 9530020I12 gene [Source:MGI Symbol;Acc:MGI:1924692]
ENSMUSG00000059975	155.002	156.887	156.209	139.431	238.425	228.698	254.923	246.563	242.152	151.882	-0.675601	1.43646e-06	Zfp74	zinc finger protein 74 [Source:MGI Symbol;Acc:MGI:107784]
ENSMUSG00000020064	1500.2	1858.83	1800.08	1931.03	1070.58	1121.16	1311.13	1205.55	1177.1	1772.53	0.590285	1.45341e-06	Herc4	hect domain and RLD 4 [Source:MGI Symbol;Acc:MGI:1914595]
ENSMUSG00000039115	995.333	1409.18	1336.69	1076.29	2479.62	2467.94	1758.68	1894.27	2150.13	1204.37	-0.836977	1.45892e-06	Itga9	integrin alpha 9 [Source:MGI Symbol;Acc:MGI:104756]
ENSMUSG00000086596	8.85724	12.607	6.2903	12.4151	61.71	68.5324	48.6931	22.5226	50.3645	10.0424	-2.34363	1.45892e-06	Susd5	sushi domain containing 5 [Source:MGI Symbol;Acc:MGI:2685972]
ENSMUSG00000039328	136.18	119.066	113.225	90.7258	256.19	224.848	252.058	173.068	226.541	114.799	-0.988745	1.46122e-06	Rnf122	ring finger protein 122 [Source:MGI Symbol;Acc:MGI:1916117]
ENSMUSG00000027104	1371.77	1351.75	1307.33	1382.85	1058.42	1070.34	1000.36	1052.63	1045.44	1353.43	0.37314	1.46978e-06	Atf2	activating transcription factor 2 [Source:MGI Symbol;Acc:MGI:109349]
ENSMUSG00000037995	9.9644	9.80543	8.38707	3.82003	38.335	43.8915	42.2484	24.8934	37.3421	7.99423	-2.26341	1.47023e-06	Igsf9	immunoglobulin superfamily, member 9 [Source:MGI Symbol;Acc:MGI:2135283]
ENSMUSG00000046541	243.574	166.692	234.838	214.877	388.025	366.533	359.47	329.541	360.892	214.995	-0.742939	1.47085e-06	Zfp526	zinc finger protein 526 [Source:MGI Symbol;Acc:MGI:2445181]
ENSMUSG00000026208	94137	105372	99355.3	97311.5	69859.5	63524.9	76641.5	55170.8	66299.2	99044	0.579038	1.47225e-06	Des	desmin [Source:MGI Symbol;Acc:MGI:94885]
ENSMUSG00000024302	2845.39	3698.05	3352.73	3367.36	2342.18	2347.81	2423.2	2249.89	2340.77	3315.88	0.501702	1.47361e-06	Dtna	dystrobrevin alpha [Source:MGI Symbol;Acc:MGI:106039]
ENSMUSG00000035692	43.1791	56.031	33.5483	40.1104	97.2401	89.3231	97.3862	93.6465	94.399	43.2172	-1.14372	1.49755e-06	Isg15	ISG15 ubiquitin-like modifier [Source:MGI Symbol;Acc:MGI:1855694]
ENSMUSG00000022587	2994.86	2218.83	2132.41	1702.78	4488.94	4198.19	4460.43	3436.47	4146.01	2262.22	-0.874406	1.52557e-06	Ly6e	lymphocyte antigen 6 complex, locus E [Source:MGI Symbol;Acc:MGI:106651]
ENSMUSG00000027858	261.289	239.533	229.596	264.537	395.505	364.993	353.741	391.181	376.355	248.739	-0.593288	1.52717e-06	Tspan2	tetraspanin 2 [Source:MGI Symbol;Acc:MGI:1917997]
ENSMUSG00000070084	117.358	75.6419	70.2417	89.7708	35.53	20.0207	39.3841	18.9664	28.4753	88.2532	1.61931	1.54107e-06	Mir486	microRNA 486 [Source:MGI Symbol;Acc:MGI:3619423]
ENSMUSG00000024793	46.5005	54.6303	38.7902	51.5705	232.815	153.235	158.253	71.1239	153.857	47.8729	-1.69066	1.56044e-06	Tnfrsf25	tumor necrosis factor receptor superfamily, member 25 [Source:MGI Symbol;Acc:MGI:1934667]
ENSMUSG00000020474	98.5368	79.8442	91.2094	81.1757	158.015	165.556	161.117	143.433	157.03	87.6915	-0.842317	1.57502e-06	Polm	polymerase (DNA directed), mu [Source:MGI Symbol;Acc:MGI:1860191]
ENSMUSG00000064225	1370.66	1463.81	1572.58	1379.03	1958.83	2669.68	2061.58	2847.33	2384.35	1446.52	-0.720587	1.58305e-06	Paqr9	progestin and adipoQ receptor family member IX [Source:MGI Symbol;Acc:MGI:1922802]
ENSMUSG00000024590	117.358	81.245	104.838	85.9508	191.675	189.427	249.194	162.4	198.174	97.3482	-1.02779	1.61013e-06	Lmnb1	lamin B1 [Source:MGI Symbol;Acc:MGI:96795]
ENSMUSG00000001542	943.297	1452.6	926.771	1191.85	624.58	599.851	713.211	623.519	640.29	1128.63	0.816048	1.61445e-06	Ell2	elongation factor RNA polymerase II 2 [Source:MGI Symbol;Acc:MGI:2183438]
ENSMUSG00000092171	50.9292	63.0349	39.8386	55.3905	15.895	20.0207	18.6179	11.854	16.5969	52.2983	1.62547	1.62265e-06	4833427F10Rik	RIKEN cDNA 4833427F10 gene [Source:MGI Symbol;Acc:MGI:1921851]
ENSMUSG00000003477	1494.66	1252.29	1163.71	1018.04	639.54	807.758	560.687	776.436	696.105	1232.17	0.824378	1.62395e-06	Inmt	indolethylamine N-methyltransferase [Source:MGI Symbol;Acc:MGI:102963]
ENSMUSG00000068742	3045.79	2504.59	2469.99	2535.55	1509.09	1932	1566.77	1204.36	1553.06	2638.98	0.763771	1.62991e-06	Cry2	cryptochrome 2 (photolyase-like) [Source:MGI Symbol;Acc:MGI:1270859]
ENSMUSG00000060441	60.8936	54.6303	59.7579	62.0755	108.46	110.884	119.585	154.102	123.258	59.3393	-1.04292	1.63305e-06	Trim5	tripartite motif-containing 5 [Source:MGI Symbol;Acc:MGI:3646853]
ENSMUSG00000107605	181.574	155.486	97.4997	84.0407	50.49	49.2817	45.1127	28.4496	43.3335	129.65	1.56633	1.64296e-06	Gm44117	predicted gene, 44117 [Source:MGI Symbol;Acc:MGI:5690509]
ENSMUSG00000055817	796.045	725.602	756.933	801.252	576.895	582.14	510.561	507.35	544.237	769.958	0.500699	1.64659e-06	Mta3	metastasis associated 3 [Source:MGI Symbol;Acc:MGI:2151172]
ENSMUSG00000039242	453.934	591.127	526.289	645.586	897.601	837.789	892.946	828.593	864.232	554.234	-0.641135	1.67826e-06	B3galnt2	UDP-GalNAc:betaGlcNAc beta 1,3-galactosaminyltransferase, polypeptide 2 [Source:MGI Symbol;Acc:MGI:2145517]
ENSMUSG00000029545	4364.41	5477.03	5477.81	4840.94	7341.62	6970.28	6834.22	7261.75	7101.97	5040.05	-0.494901	1.6798e-06	Acads	acyl-Coenzyme A dehydrogenase, short chain [Source:MGI Symbol;Acc:MGI:87868]
ENSMUSG00000027981	589.007	714.396	723.385	849.957	332.86	379.623	399.57	506.165	404.555	719.186	0.833407	1.68856e-06	Rnpc3	RNA-binding region (RNP1, RRM) containing 3 [Source:MGI Symbol;Acc:MGI:1914475]
ENSMUSG00000048450	62.0007	50.4279	58.7095	65.8956	139.315	122.434	116.004	103.13	120.221	59.2584	-1.01498	1.6945e-06	Msx1	msh homeobox 1 [Source:MGI Symbol;Acc:MGI:97168]
ENSMUSG00000033004	2640.57	3815.71	3709.18	3704.48	1874.68	2005.15	2067.31	2435.99	2095.78	3467.48	0.726793	1.70792e-06	Mycbp2	MYC binding protein 2, E3 ubiquitin protein ligase [Source:MGI Symbol;Acc:MGI:2179432]
ENSMUSG00000097222	562.435	621.945	649.998	744.907	427.295	425.825	439.67	427.929	430.18	644.821	0.585316	1.70792e-06	1010001N08Rik	RIKEN cDNA 1010001N08 gene [Source:MGI Symbol;Acc:MGI:1915684]
ENSMUSG00000002833	2616.21	2431.75	2334.75	2287.25	1793.33	1657.1	1692.8	1324.09	1616.83	2417.49	0.579048	1.7121e-06	Hdgfl2	HDGF like 2 [Source:MGI Symbol;Acc:MGI:1194492]
ENSMUSG00000025993	505.97	617.742	567.176	650.361	810.645	860.89	878.624	862.97	853.282	585.312	-0.544052	1.7121e-06	Slc40a1	solute carrier family 40 (iron-regulated transporter), member 1 [Source:MGI Symbol;Acc:MGI:1315204]
ENSMUSG00000029402	318.861	336.186	291.451	418.294	181.39	177.876	210.526	215.742	196.384	341.198	0.800278	1.73571e-06	Snrnp35	small nuclear ribonucleoprotein 35 (U11/U12) [Source:MGI Symbol;Acc:MGI:1923417]
ENSMUSG00000031960	3555.08	3196.57	3279.34	3509.66	2397.34	2276.97	2636.59	1973.69	2321.15	3385.16	0.543627	1.74821e-06	Aars	alanyl-tRNA synthetase [Source:MGI Symbol;Acc:MGI:2384560]
ENSMUSG00000062960	3689.04	2141.79	2497.25	2159.27	7206.05	5598.86	4822.05	4280.47	5476.86	2621.84	-1.06274	1.76309e-06	Kdr	kinase insert domain protein receptor [Source:MGI Symbol;Acc:MGI:96683]
ENSMUSG00000024538	350.968	333.385	422.499	311.333	530.145	652.213	582.885	529.873	573.779	354.546	-0.695761	1.76514e-06	Ppic	peptidylprolyl isomerase C [Source:MGI Symbol;Acc:MGI:97751]
ENSMUSG00000111765	67.5365	72.8404	67.0966	44.8854	122.485	204.057	142.499	128.023	149.266	63.0897	-1.25476	1.76726e-06	Gm10635	predicted gene 10635 [Source:MGI Symbol;Acc:MGI:3641740]
ENSMUSG00000025701	367.576	301.167	274.677	326.613	491.81	615.251	572.86	454.008	533.482	317.508	-0.750877	1.78557e-06	Alox5	arachidonate 5-lipoxygenase [Source:MGI Symbol;Acc:MGI:87999]
ENSMUSG00000079037	5748.35	6585.05	6065.95	5894.31	4831.15	4113.48	4603.65	4150.08	4424.59	6073.42	0.456581	1.82065e-06	Prnp	prion protein [Source:MGI Symbol;Acc:MGI:97769]
ENSMUSG00000033705	716.33	565.914	528.385	587.33	933.131	971.774	882.92	861.784	912.402	599.49	-0.606227	1.82065e-06	Stard9	START domain containing 9 [Source:MGI Symbol;Acc:MGI:3045258]
ENSMUSG00000032265	1194.62	1533.85	1079.84	1155.56	753.61	729.215	829.931	574.918	721.919	1240.97	0.778339	1.84175e-06	Tent5a	terminal nucleotidyltransferase 5A [Source:MGI Symbol;Acc:MGI:2670964]
ENSMUSG00000037253	366.469	435.641	341.773	397.283	547.91	569.82	557.822	589.143	566.174	385.292	-0.557673	1.86036e-06	Mex3c	mex3 RNA binding family member C [Source:MGI Symbol;Acc:MGI:2652843]
ENSMUSG00000026172	508.184	592.528	559.837	534.805	908.821	847.799	718.939	783.548	814.777	548.839	-0.571021	1.86921e-06	Bcs1l	BCS1-like (yeast) [Source:MGI Symbol;Acc:MGI:1914071]
ENSMUSG00000049103	12.1787	9.80543	17.8225	13.3701	74.8	83.9329	729.68	165.956	263.592	13.2942	-4.30647	1.91177e-06	Ccr2	chemokine (C-C motif) receptor 2 [Source:MGI Symbol;Acc:MGI:106185]
ENSMUSG00000049800	700.83	672.372	684.595	586.375	936.871	1121.93	1023.99	879.565	990.588	661.043	-0.586235	1.9292e-06	Sertad2	SERTA domain containing 2 [Source:MGI Symbol;Acc:MGI:1931026]
ENSMUSG00000043263	8.85724	9.80543	14.6774	17.1902	41.14	37.7313	55.1378	50.9721	46.2453	12.6326	-1.84782	1.9354e-06	Ifi209	interferon activated gene 209 [Source:MGI Symbol;Acc:MGI:2138243]
ENSMUSG00000062198	968.761	895.096	609.111	883.383	484.33	482.807	517.006	491.94	494.021	839.088	0.763391	1.95976e-06	2700097O09Rik	RIKEN cDNA 2700097O09 gene [Source:MGI Symbol;Acc:MGI:1919908]
ENSMUSG00000056941	358.718	383.813	357.499	341.893	503.03	487.427	529.895	515.648	509	360.481	-0.500491	1.96731e-06	Commd7	COMM domain containing 7 [Source:MGI Symbol;Acc:MGI:1914197]
ENSMUSG00000064280	50.9292	64.4357	73.3869	42.9754	124.355	108.574	140.351	129.208	125.622	57.9318	-1.12343	1.98341e-06	Ccdc146	coiled-coil domain containing 146 [Source:MGI Symbol;Acc:MGI:1922422]
ENSMUSG00000022885	251.324	226.926	242.177	276.952	385.22	362.683	411.027	500.238	414.792	249.345	-0.727578	1.99772e-06	St6gal1	beta galactoside alpha 2,6 sialyltransferase 1 [Source:MGI Symbol;Acc:MGI:108470]
ENSMUSG00000104693	46.5005	37.821	31.4515	59.2105	3.74	10.0103	12.8893	13.0394	9.91977	43.7459	2.14467	2.00642e-06	Gm42941	predicted gene 42941 [Source:MGI Symbol;Acc:MGI:5663078]
ENSMUSG00000019877	10935.4	13157.5	12680.2	12432.3	8694.57	8668.19	8738.98	9819.84	8980.39	12301.3	0.454091	2.05401e-06	Serinc1	serine incorporator 1 [Source:MGI Symbol;Acc:MGI:1926228]
ENSMUSG00000087129	141.716	147.081	141.532	128.926	74.8	63.9122	88.0772	67.5677	73.5893	139.814	0.917103	2.05808e-06	Gm16316	predicted gene 16316 [Source:MGI Symbol;Acc:MGI:3826530]
ENSMUSG00000042249	1244.44	942.722	1001.21	1056.24	704.055	688.404	737.557	745.615	718.908	1061.15	0.563082	2.05812e-06	Grk3	G protein-coupled receptor kinase 3 [Source:MGI Symbol;Acc:MGI:87941]
ENSMUSG00000045790	543.613	479.065	489.595	465.089	303.875	310.321	358.754	349.692	330.66	494.341	0.580478	2.09438e-06	Ccdc149	coiled-coil domain containing 149 [Source:MGI Symbol;Acc:MGI:2685293]
ENSMUSG00000039041	2794.46	2718.91	2655.56	2963.39	1940.13	2022.09	2237.02	1792.32	1997.89	2783.08	0.477218	2.11227e-06	Adrm1	adhesion regulating molecule 1 [Source:MGI Symbol;Acc:MGI:1929289]
ENSMUSG00000021822	55.3578	42.0233	48.2257	76.4007	117.81	167.096	133.906	110.242	132.263	55.5018	-1.24522	2.11684e-06	Plau	plasminogen activator, urokinase [Source:MGI Symbol;Acc:MGI:97611]
ENSMUSG00000046324	311.111	364.202	371.128	334.253	503.03	482.037	494.808	540.542	505.104	345.173	-0.548617	2.14776e-06	Ermp1	endoplasmic reticulum metallopeptidase 1 [Source:MGI Symbol;Acc:MGI:106250]
ENSMUSG00000033855	697.508	719.999	674.111	682.831	515.185	495.897	490.511	405.406	476.75	693.612	0.536545	2.15339e-06	Ston1	stonin 1 [Source:MGI Symbol;Acc:MGI:1924307]
ENSMUSG00000030315	328.825	331.984	401.531	324.703	598.4	505.138	515.574	512.092	532.801	346.761	-0.618472	2.15677e-06	Vgll4	vestigial like family member 4 [Source:MGI Symbol;Acc:MGI:2652840]
ENSMUSG00000050423	40.9648	70.0388	58.7095	93.5908	21.505	21.5607	22.1983	14.2248	19.8722	65.826	1.7146	2.18047e-06	Ppp1r3g	protein phosphatase 1, regulatory subunit 3G [Source:MGI Symbol;Acc:MGI:1923737]
ENSMUSG00000030844	67.5365	84.0466	70.2417	56.3455	124.355	123.204	149.66	155.287	138.127	69.5426	-0.998907	2.21725e-06	Rgs10	regulator of G-protein signalling 10 [Source:MGI Symbol;Acc:MGI:1915115]
ENSMUSG00000047648	1385.05	1921.86	1663.79	2101.97	1108.91	729.985	939.49	1092.94	967.831	1768.17	0.870534	2.22126e-06	Fbxo30	F-box protein 30 [Source:MGI Symbol;Acc:MGI:1919115]
ENSMUSG00000053063	27.6789	9.80543	14.6774	11.4601	43.01	54.6719	68.7432	81.7925	62.0544	15.9054	-1.95288	2.23972e-06	Clec12a	C-type lectin domain family 12, member a [Source:MGI Symbol;Acc:MGI:3040968]
ENSMUSG00000030595	974.297	970.738	897.417	1132.64	691.9	706.885	707.482	616.407	680.669	993.773	0.544852	2.27469e-06	Nfkbib	nuclear factor of kappa light polypeptide gene enhancer in B cells inhibitor, beta [Source:MGI Symbol;Acc:MGI:104752]
ENSMUSG00000027329	141.716	130.272	134.193	138.476	285.175	231.008	290.01	192.035	249.557	136.164	-0.87736	2.27928e-06	Spef1	sperm flagellar 1 [Source:MGI Symbol;Acc:MGI:3513546]
ENSMUSG00000026065	38.7504	57.4318	33.5483	40.1104	9.35001	14.6305	6.44467	13.0394	10.8661	42.4602	1.97285	2.28741e-06	Slc9a4	solute carrier family 9 (sodium/hydrogen exchanger), member 4 [Source:MGI Symbol;Acc:MGI:105074]
ENSMUSG00000047583	66.4293	67.2372	75.4836	74.4907	151.47	137.835	130.326	116.169	133.95	70.9102	-0.916887	2.28741e-06	Tyw3	tRNA-yW synthesizing protein 3 homolog (S. cerevisiae) [Source:MGI Symbol;Acc:MGI:2445040]
ENSMUSG00000064342	52.0363	131.673	112.177	81.1757	327.25	214.837	232.724	206.259	245.268	94.2655	-1.38631	2.28923e-06	mt-Ti	mitochondrially encoded tRNA isoleucine [Source:MGI Symbol;Acc:MGI:102484]
ENSMUSG00000029093	2052.67	1643.11	1460.4	1855.58	978.946	1128.86	568.564	736.132	853.125	1752.94	1.03889	2.29968e-06	Sorcs2	sortilin-related VPS10 domain containing receptor 2 [Source:MGI Symbol;Acc:MGI:1932289]
ENSMUSG00000031029	5112.84	4989.56	4634.91	4798.92	3931.68	3911.74	3937.7	3783.79	3891.23	4884.06	0.327369	2.31723e-06	Eif3f	eukaryotic translation initiation factor 3, subunit F [Source:MGI Symbol;Acc:MGI:1913335]
ENSMUSG00000046034	1127.08	1605.29	1612.41	1395.27	821.865	832.399	1009.67	844.004	876.983	1435.01	0.709204	2.33946e-06	Otulin	OTU deubiquitinase with linear linkage specificity [Source:MGI Symbol;Acc:MGI:3577015]
ENSMUSG00000054277	659.865	718.598	748.546	673.281	442.255	373.463	529.895	433.856	444.867	700.072	0.652639	2.35399e-06	Arfgap3	ADP-ribosylation factor GTPase activating protein 3 [Source:MGI Symbol;Acc:MGI:1913501]
ENSMUSG00000059851	324.397	219.922	267.338	279.817	486.2	503.597	456.14	392.367	459.576	272.868	-0.750563	2.36749e-06	Kmt5c	lysine methyltransferase 5C [Source:MGI Symbol;Acc:MGI:2385262]
ENSMUSG00000079355	43.1791	35.0194	81.7739	48.7054	177.65	233.318	94.5219	160.029	166.38	52.1695	-1.66523	2.38341e-06	Ackr4	atypical chemokine receptor 4 [Source:MGI Symbol;Acc:MGI:2181676]
ENSMUSG00000114898	151.68	148.482	166.693	165.216	78.54	97.7934	78.7682	98.388	88.3724	158.018	0.84589	2.38742e-06	Gm49390	predicted gene, 49390 [Source:MGI Symbol;Acc:MGI:6121617]
ENSMUSG00000054021	1253.3	1388.17	1458.3	1426.78	1072.45	1020.29	912.28	958.987	990.999	1381.64	0.479873	2.39125e-06	Sirt5	sirtuin 5 [Source:MGI Symbol;Acc:MGI:1915596]
ENSMUSG00000031959	328.825	299.766	302.983	278.862	484.33	467.406	482.635	397.108	457.87	302.609	-0.601444	2.40089e-06	Wdr59	WD repeat domain 59 [Source:MGI Symbol;Acc:MGI:2442115]
ENSMUSG00000026047	307.789	295.564	312.418	321.838	445.995	423.515	436.09	464.676	442.569	309.402	-0.51207	2.40821e-06	Kdelc1	KDEL (Lys-Asp-Glu-Leu) containing 1 [Source:MGI Symbol;Acc:MGI:1919300]
ENSMUSG00000110071	21.036	72.8404	46.1289	38.2003	8.415	5.39019	4.29645	13.0394	7.78526	44.5514	2.56089	2.41567e-06	Gm45512	predicted gene 45512 [Source:MGI Symbol;Acc:MGI:5791348]
ENSMUSG00000005836	3013.68	2919.22	2818.06	3012.1	2328.15	2025.94	2307.19	1960.65	2155.48	2940.76	0.447583	2.41567e-06	Gata6	GATA binding protein 6 [Source:MGI Symbol;Acc:MGI:107516]
ENSMUSG00000040212	182.681	208.716	199.193	206.282	314.16	295.69	470.461	397.108	369.355	199.218	-0.891489	2.41567e-06	Emp3	epithelial membrane protein 3 [Source:MGI Symbol;Acc:MGI:1098729]
ENSMUSG00000043631	631.079	634.552	529.434	454.584	1078.06	1039.54	755.459	1177.1	1012.54	562.412	-0.848693	2.44061e-06	Ecm2	extracellular matrix protein 2, female organ and adipocyte specific [Source:MGI Symbol;Acc:MGI:3039578]
ENSMUSG00000009876	153.895	145.681	145.725	164.261	273.02	240.248	235.589	232.338	245.299	152.391	-0.683932	2.4672e-06	Cox4i2	cytochrome c oxidase subunit 4I2 [Source:MGI Symbol;Acc:MGI:2135755]
ENSMUSG00000074247	1445.95	1473.62	1489.75	1568.12	1064.97	1148.88	1195.13	1032.48	1110.36	1494.36	0.42694	2.48744e-06	Dda1	DET1 and DDB1 associated 1 [Source:MGI Symbol;Acc:MGI:1913748]
ENSMUSG00000021453	903.439	715.797	846.046	770.692	303.875	284.91	552.094	214.557	338.859	808.993	1.25185	2.49967e-06	Gadd45g	growth arrest and DNA-damage-inducible 45 gamma [Source:MGI Symbol;Acc:MGI:1346325]
ENSMUSG00000005883	23.2503	26.6147	18.8709	15.2801	2.805	2.31008	2.8643	1.1854	2.29119	21.004	3.1399	2.50043e-06	Spo11	SPO11 meiotic protein covalently bound to DSB [Source:MGI Symbol;Acc:MGI:1349669]
ENSMUSG00000052915	2307.31	2625.05	2655.56	2547.01	3432.39	3314.2	3387.75	3165.01	3324.84	2533.73	-0.392505	2.50356e-06	Msl1	male specific lethal 1 [Source:MGI Symbol;Acc:MGI:1921276]
ENSMUSG00000001288	542.506	494.474	478.063	443.124	664.785	790.817	764.052	679.233	724.722	489.542	-0.569095	2.53818e-06	Rarg	retinoic acid receptor, gamma [Source:MGI Symbol;Acc:MGI:97858]
ENSMUSG00000021192	1516.8	1563.27	1529.59	1610.14	1181.84	1215.1	1264.59	1177.1	1209.66	1554.95	0.361311	2.54632e-06	Golga5	golgi autoantigen, golgin subfamily a, 5 [Source:MGI Symbol;Acc:MGI:1351475]
ENSMUSG00000033024	6.64293	11.2062	8.38707	10.5051	41.14	26.9509	36.5198	54.5283	39.7848	9.18533	-2.10851	2.62266e-06	Klra9	killer cell lectin-like receptor subfamily A, member 9 [Source:MGI Symbol;Acc:MGI:1321153]
ENSMUSG00000015355	33.2147	14.0078	17.8225	21.9652	66.385	52.3618	103.831	72.3093	73.7218	21.7525	-1.75252	2.65981e-06	Cd48	CD48 antigen [Source:MGI Symbol;Acc:MGI:88339]
ENSMUSG00000001062	757.294	634.552	734.917	654.181	1171.56	1281.32	1056.21	903.273	1103.09	695.236	-0.666672	2.67768e-06	Vps9d1	VPS9 domain containing 1 [Source:MGI Symbol;Acc:MGI:1914143]
ENSMUSG00000046101	22.1431	29.4163	16.7741	24.8302	1.87	3.08011	5.01252	2.3708	3.08336	23.2909	2.85691	2.68867e-06	Mcmdc2	minichromosome maintenance domain containing 2 [Source:MGI Symbol;Acc:MGI:3045334]
ENSMUSG00000090799	871.331	504.279	700.32	792.657	1510.03	1647.86	1042.61	1386.92	1396.85	717.147	-0.96012	2.69917e-06	Klhl33	kelch-like 33 [Source:MGI Symbol;Acc:MGI:3644593]
ENSMUSG00000047793	587.9	409.027	408.87	403.014	792.88	958.683	670.246	808.442	807.563	452.202	-0.836328	2.7065e-06	Sned1	sushi, nidogen and EGF-like domains 1 [Source:MGI Symbol;Acc:MGI:3045960]
ENSMUSG00000006920	3478.68	3293.22	2950.15	2983.45	2365.55	2146.83	2215.54	1753.2	2120.28	3176.38	0.582128	2.7174e-06	Ezh1	enhancer of zeste 1 polycomb repressive complex 2 subunit [Source:MGI Symbol;Acc:MGI:1097695]
ENSMUSG00000064215	427.362	550.505	619.595	450.764	1165.01	726.135	891.513	1019.44	950.525	512.056	-0.892128	2.74301e-06	Ifi27	interferon, alpha-inducible protein 27 [Source:MGI Symbol;Acc:MGI:1277180]
ENSMUSG00000032224	140.609	155.486	189.757	140.386	336.6	332.652	237.737	261.973	292.24	156.56	-0.900864	2.74465e-06	Fam81a	family with sequence similarity 81, member A [Source:MGI Symbol;Acc:MGI:1924136]
ENSMUSG00000000058	1323.05	1599.69	1431.04	1410.55	2113.1	1849.6	1943.43	2134.9	2010.26	1441.08	-0.480485	2.74662e-06	Cav2	caveolin 2 [Source:MGI Symbol;Acc:MGI:107571]
ENSMUSG00000021390	1417.16	1977.9	2062.17	1525.15	3265.96	3778.52	2343	4035.1	3355.64	1745.59	-0.942852	2.75127e-06	Ogn	osteoglycin [Source:MGI Symbol;Acc:MGI:109278]
ENSMUSG00000004451	607.828	718.598	707.659	717.211	941.546	960.223	951.664	923.425	944.214	687.824	-0.457875	2.75939e-06	Ralb	v-ral simian leukemia viral oncogene B [Source:MGI Symbol;Acc:MGI:1927244]
ENSMUSG00000070972	1068.41	1015.56	1138.54	1048.6	801.295	821.619	770.497	825.037	804.612	1067.78	0.409981	2.77866e-06	Dnajc25	DnaJ heat shock protein family (Hsp40) member C25 [Source:MGI Symbol;Acc:MGI:1919679]
ENSMUSG00000028138	2860.89	3616.8	3481.68	3502.02	2348.72	2267.73	2353.74	2552.16	2380.59	3365.35	0.499752	2.81347e-06	Adh5	alcohol dehydrogenase 5 (class III), chi polypeptide [Source:MGI Symbol;Acc:MGI:87929]
ENSMUSG00000052949	449.505	383.813	379.515	400.149	228.14	301.08	231.292	225.226	246.435	403.245	0.707447	2.82461e-06	Rnf157	ring finger protein 157 [Source:MGI Symbol;Acc:MGI:2442484]
ENSMUSG00000012640	493.791	557.509	672.014	685.696	983.621	915.562	880.772	1034.85	953.702	602.253	-0.66021	2.84789e-06	Zfp715	zinc finger protein 715 [Source:MGI Symbol;Acc:MGI:1917180]
ENSMUSG00000020205	414.076	529.493	410.966	400.149	271.15	258.729	295.023	282.125	276.757	438.671	0.66046	2.89671e-06	Phlda1	pleckstrin homology like domain, family A, member 1 [Source:MGI Symbol;Acc:MGI:1096880]
ENSMUSG00000075705	4058.83	3887.15	4058.29	5341.36	2981.72	2639.65	2911.56	2899.48	2858.1	4336.41	0.601958	2.89681e-06	Msrb1	methionine sulfoxide reductase B1 [Source:MGI Symbol;Acc:MGI:1351642]
ENSMUSG00000028078	36.5361	42.0233	31.4515	42.9754	115.94	103.184	94.5219	64.0115	94.4143	38.2466	-1.31262	2.89758e-06	Dclk2	doublecortin-like kinase 2 [Source:MGI Symbol;Acc:MGI:1918012]
ENSMUSG00000026587	18.8216	19.6109	17.8225	17.1902	64.515	50.8218	50.8413	43.8597	52.5095	18.3613	-1.52427	2.90481e-06	Astn1	astrotactin 1 [Source:MGI Symbol;Acc:MGI:1098567]
ENSMUSG00000019326	337.682	245.136	231.693	248.302	683.485	651.443	610.812	344.951	572.673	265.703	-1.10975	2.92057e-06	Aoc3	amine oxidase, copper containing 3 [Source:MGI Symbol;Acc:MGI:1306797]
ENSMUSG00000034235	2668.25	2584.43	2277.09	2897.5	1548.36	1852.68	1568.2	1116.65	1521.47	2606.82	0.775707	2.92119e-06	Usp54	ubiquitin specific peptidase 54 [Source:MGI Symbol;Acc:MGI:1926037]
ENSMUSG00000024991	9651.08	12934.8	12323.8	12687.3	8212.11	6859.4	8423.91	7871.04	7841.61	11899.2	0.601632	2.95587e-06	Eif3a	eukaryotic translation initiation factor 3, subunit A [Source:MGI Symbol;Acc:MGI:95301]
ENSMUSG00000042354	978.726	1124.82	1074.59	1047.64	696.575	683.784	841.388	669.75	722.874	1056.45	0.544698	2.99389e-06	Gnl3	guanine nucleotide binding protein-like 3 (nucleolar) [Source:MGI Symbol;Acc:MGI:1353651]
ENSMUSG00000069792	74.1794	89.6497	66.0482	80.2207	129.965	151.695	308.628	246.563	209.213	77.5245	-1.43544	2.99811e-06	Wfdc17	WAP four-disulfide core domain 17 [Source:MGI Symbol;Acc:MGI:3649773]
ENSMUSG00000022906	419.612	371.206	343.87	362.903	624.58	549.799	553.526	510.907	559.703	374.398	-0.581505	3.02557e-06	Parp9	poly (ADP-ribose) polymerase family, member 9 [Source:MGI Symbol;Acc:MGI:1933117]
ENSMUSG00000034007	947.725	1207.47	1154.27	1063.88	670.395	700.724	751.879	816.739	734.934	1093.34	0.573395	3.02912e-06	Scaper	S phase cyclin A-associated protein in the ER [Source:MGI Symbol;Acc:MGI:1925976]
ENSMUSG00000041695	1005.3	1029.57	1111.29	1594.86	2069.16	1969.73	1927.67	2105.27	2017.96	1185.25	-0.766242	3.03002e-06	Kcnj2	potassium inwardly-rectifying channel, subfamily J, member 2 [Source:MGI Symbol;Acc:MGI:104744]
ENSMUSG00000048534	69.7508	57.4318	69.1933	83.0857	11.22	13.0905	32.2234	5.92699	15.6152	69.8654	2.12123	3.03576e-06	Jaml	junction adhesion molecule like [Source:MGI Symbol;Acc:MGI:2685484]
ENSMUSG00000097616	58.6792	81.245	70.2417	60.1655	157.08	127.824	113.856	143.433	135.548	67.5829	-1.00806	3.03709e-06	1110019D14Rik	RIKEN cDNA 1110019D14 gene [Source:MGI Symbol;Acc:MGI:1923561]
ENSMUSG00000090841	3424.43	3494.94	3868.54	3900.25	4799.36	4802.66	4696.02	5248.94	4886.74	3672.04	-0.411501	3.06319e-06	Myl6	myosin, light polypeptide 6, alkali, smooth muscle and non-muscle [Source:MGI Symbol;Acc:MGI:109318]
ENSMUSG00000034377	2615.1	2787.54	2857.89	2685.48	1751.26	1948.94	2224.84	1934.57	1964.9	2736.51	0.477079	3.07057e-06	Tulp4	tubby like protein 4 [Source:MGI Symbol;Acc:MGI:1916092]
ENSMUSG00000019132	10459.3	9477.65	9495.21	10594.9	7794.16	7550.11	8057.99	7226.19	7657.11	10006.8	0.386042	3.07334e-06	BC005537	cDNA sequence BC005537 [Source:MGI Symbol;Acc:MGI:2441726]
ENSMUSG00000110834	151.68	184.902	179.274	207.237	96.3051	86.243	82.3486	119.725	96.1555	180.773	0.924252	3.09947e-06	Gm39469	predicted gene, 39469 [Source:MGI Symbol;Acc:MGI:5622354]
ENSMUSG00000057531	3260.57	3965.6	3677.73	3663.41	2694.67	2562.65	2823.48	2724.05	2701.21	3641.83	0.430706	3.10475e-06	Dtnbp1	dystrobrevin binding protein 1 [Source:MGI Symbol;Acc:MGI:2137586]
ENSMUSG00000018559	1565.52	1700.54	1641.77	1568.12	2061.68	2160.69	1990.69	2211.95	2106.25	1618.99	-0.379677	3.10475e-06	Ctdnep1	CTD nuclear envelope phosphatase 1 [Source:MGI Symbol;Acc:MGI:1914431]
ENSMUSG00000005338	33.2147	29.4163	28.3064	19.1002	71.06	62.3722	65.1628	90.0903	72.1713	27.5094	-1.39274	3.10475e-06	Cadm3	cell adhesion molecule 3 [Source:MGI Symbol;Acc:MGI:2137858]
ENSMUSG00000024818	105.18	82.6458	73.3869	97.4109	162.69	184.036	209.81	145.804	175.585	89.6558	-0.973287	3.18293e-06	Slc25a45	solute carrier family 25, member 45 [Source:MGI Symbol;Acc:MGI:2147731]
ENSMUSG00000088705	13.2859	32.2178	11.5322	28.6503	0	0.770027	1.43215	1.1854	0.846894	21.4215	4.62806	3.22898e-06	Gm25549	predicted gene, 25549 [Source:MGI Symbol;Acc:MGI:5455326]
ENSMUSG00000028567	467.22	458.054	426.692	445.989	647.955	636.812	587.898	609.295	620.49	449.489	-0.46578	3.22898e-06	Txndc12	thioredoxin domain containing 12 (endoplasmic reticulum) [Source:MGI Symbol;Acc:MGI:1913323]
ENSMUSG00000026574	1286.51	1386.77	1597.74	1186.12	2629.22	2692.01	1841.74	3953.3	2779.07	1364.29	-1.02592	3.26071e-06	Dpt	dermatopontin [Source:MGI Symbol;Acc:MGI:1928392]
ENSMUSG00000022707	2430.21	2718.91	2732.09	2721.77	2010.25	1953.56	1561.04	1856.33	1845.3	2650.74	0.52303	3.29012e-06	Gbe1	glucan (1,4-alpha-), branching enzyme 1 [Source:MGI Symbol;Acc:MGI:1921435]
ENSMUSG00000030707	104.073	121.868	121.613	124.151	258.06	197.127	713.211	353.249	380.412	117.926	-1.69091	3.29706e-06	Coro1a	coronin, actin binding protein 1A [Source:MGI Symbol;Acc:MGI:1345961]
ENSMUSG00000067825	240.253	240.933	278.87	236.842	359.04	392.714	376.655	357.99	371.6	249.225	-0.577254	3.35408e-06	Pex26	peroxisomal biogenesis factor 26 [Source:MGI Symbol;Acc:MGI:1921293]
ENSMUSG00000016256	512.613	529.493	586.047	533.85	794.75	771.567	1168.63	898.532	908.371	540.501	-0.749519	3.38004e-06	Ctsz	cathepsin Z [Source:MGI Symbol;Acc:MGI:1891190]
ENSMUSG00000033623	815.974	871.283	981.287	877.653	1255.71	1211.25	1168.63	1193.7	1207.32	886.549	-0.444843	3.41898e-06	Pcgf3	polycomb group ring finger 3 [Source:MGI Symbol;Acc:MGI:1916837]
ENSMUSG00000034673	504.863	458.054	477.015	471.774	634.865	659.913	712.495	638.93	661.551	477.926	-0.470046	3.41898e-06	Pbx2	pre B cell leukemia homeobox 2 [Source:MGI Symbol;Acc:MGI:1341793]
ENSMUSG00000043439	207.038	88.2489	131.048	205.327	15.895	59.2921	36.5198	54.5283	41.5588	157.915	1.93066	3.42428e-06	Epop	elongin BC and polycomb repressive complex 2 associated protein [Source:MGI Symbol;Acc:MGI:2143991]
ENSMUSG00000026399	117.358	163.891	209.677	142.296	318.835	300.31	279.985	448.081	336.803	158.306	-1.08591	3.42667e-06	Cd55	CD55 molecule, decay accelerating factor for complement [Source:MGI Symbol;Acc:MGI:104850]
ENSMUSG00000030921	225.86	242.334	182.419	159.486	429.165	348.052	423.2	304.647	376.266	202.525	-0.901216	3.44555e-06	Trim30a	tripartite motif-containing 30A [Source:MGI Symbol;Acc:MGI:98178]
ENSMUSG00000095115	1295.37	1309.73	1246.53	1141.23	1712.92	1570.85	1785.17	1660.74	1682.42	1248.22	-0.431998	3.46817e-06	Itpripl2	inositol 1,4,5-triphosphate receptor interacting protein-like 2 [Source:MGI Symbol;Acc:MGI:2442416]
ENSMUSG00000022037	40715.6	32367.7	33679.3	33873.2	19964.1	20578.2	27675.6	19822.2	22010	35159	0.675671	3.47053e-06	Clu	clusterin [Source:MGI Symbol;Acc:MGI:88423]
ENSMUSG00000025732	4470.69	5364.97	5240.87	5554.33	3806.39	3699.98	3320.44	3857.29	3671.02	5157.72	0.49092	3.47053e-06	Mcrip2	MAPK regulated corepressor interacting protein 2 [Source:MGI Symbol;Acc:MGI:1915491]
ENSMUSG00000022853	623.329	449.649	524.192	531.94	765.765	860.89	767.632	922.24	829.132	532.277	-0.636358	3.47053e-06	Ehhadh	enoyl-Coenzyme A, hydratase/3-hydroxyacyl Coenzyme A dehydrogenase [Source:MGI Symbol;Acc:MGI:1277964]
ENSMUSG00000040549	2544.24	3503.34	3299.26	3055.07	1942.93	1962.03	2135.34	2228.55	2067.21	3100.48	0.584751	3.47987e-06	Ckap5	cytoskeleton associated protein 5 [Source:MGI Symbol;Acc:MGI:1923036]
ENSMUSG00000058818	117.358	71.4396	84.9191	95.5008	191.675	231.778	537.056	202.703	290.803	92.3045	-1.65609	3.50858e-06	Pirb	paired Ig-like receptor B [Source:MGI Symbol;Acc:MGI:894311]
ENSMUSG00000113321	129.537	147.081	182.419	88.8158	68.255	56.982	43.6806	52.1575	55.2688	136.963	1.30963	3.51108e-06	Gm8075	predicted gene 8075 [Source:MGI Symbol;Acc:MGI:3643190]
ENSMUSG00000030214	823.724	1075.8	1065.16	940.683	1507.22	1516.18	1425.71	1319.35	1442.11	976.34	-0.564244	3.55216e-06	Plbd1	phospholipase B domain containing 1 [Source:MGI Symbol;Acc:MGI:1914107]
ENSMUSG00000024421	83.0367	67.2372	79.6772	83.0857	226.27	143.225	192.624	125.652	171.943	78.2592	-1.1343	3.55294e-06	Lama3	laminin, alpha 3 [Source:MGI Symbol;Acc:MGI:99909]
ENSMUSG00000026275	1258.84	1304.12	1293.71	1247.24	997.646	1021.83	1003.22	976.768	999.865	1275.98	0.350441	3.564e-06	Ppp1r7	protein phosphatase 1, regulatory subunit 7 [Source:MGI Symbol;Acc:MGI:1913635]
ENSMUSG00000044627	4591.37	5451.82	4807.89	4999.47	3525.89	3938.69	3631.93	3758.9	3713.85	4962.64	0.417821	3.56989e-06	Swi5	SWI5 recombination repair homolog (yeast) [Source:MGI Symbol;Acc:MGI:1920181]
ENSMUSG00000028581	297.825	296.965	293.547	263.582	503.965	556.729	984.603	471.788	629.272	287.98	-1.13037	3.59019e-06	Laptm5	lysosomal-associated protein transmembrane 5 [Source:MGI Symbol;Acc:MGI:108046]
ENSMUSG00000051586	7783.3	5510.65	6136.19	6598.15	4362.71	3975.65	4539.92	3393.8	4068.02	6507.08	0.677495	3.59037e-06	Mical3	microtubule associated monooxygenase, calponin and LIM domain containing 3 [Source:MGI Symbol;Acc:MGI:2442733]
ENSMUSG00000040385	7241.9	8623.18	8193.12	8032.58	5980.26	6027	6222.69	6303.95	6133.48	8022.69	0.387285	3.62732e-06	Ppp1ca	protein phosphatase 1 catalytic subunit alpha [Source:MGI Symbol;Acc:MGI:103016]
ENSMUSG00000031137	2646.1	3165.75	2994.18	2425.72	1855.04	2104.48	1855.35	1894.27	1927.29	2807.94	0.542098	3.7073e-06	Fgf13	fibroblast growth factor 13 [Source:MGI Symbol;Acc:MGI:109178]
ENSMUSG00000027668	16406.9	19753.7	19182.3	18712.4	14698.2	13276.8	13831.7	13195.9	13750.6	18513.8	0.429038	3.7073e-06	Mfn1	mitofusin 1 [Source:MGI Symbol;Acc:MGI:1914664]
ENSMUSG00000036097	1311.98	1610.89	1681.61	1462.12	976.141	1004.11	1059.79	1134.43	1043.62	1516.65	0.539687	3.7141e-06	Slf2	SMC5-SMC6 complex localization factor 2 [Source:MGI Symbol;Acc:MGI:1924968]
ENSMUSG00000031483	821.509	820.855	757.982	739.176	1060.29	1169.67	1079.13	998.105	1076.8	784.881	-0.459055	3.7141e-06	Erlin2	ER lipid raft associated 2 [Source:MGI Symbol;Acc:MGI:2387215]
ENSMUSG00000106783	32.1075	47.6264	36.6934	42.9754	86.9551	117.044	72.3236	110.242	96.6412	39.8507	-1.27981	3.7399e-06	Chaer1	cardiac hypertrophy associated epigenetic regulator 1 [Source:MGI Symbol;Acc:MGI:5624990]
ENSMUSG00000032014	181.574	210.116	223.306	129.881	321.64	327.261	349.445	430.3	357.161	186.219	-0.941393	3.75877e-06	Oaf	out at first homolog [Source:MGI Symbol;Acc:MGI:94852]
ENSMUSG00000039781	584.578	543.501	505.321	519.525	388.96	365.763	366.63	295.164	354.129	538.231	0.599353	3.76279e-06	Cep131	centrosomal protein 131 [Source:MGI Symbol;Acc:MGI:107440]
ENSMUSG00000021785	1427.12	1766.38	1657.49	1618.74	1148.18	1064.95	1139.99	1247.04	1150.04	1617.43	0.492615	3.77226e-06	Ngly1	N-glycanase 1 [Source:MGI Symbol;Acc:MGI:1913276]
ENSMUSG00000061455	1703.91	1872.84	1905.96	1886.14	1353.88	1458.43	1384.17	1452.11	1412.15	1842.21	0.383855	3.7911e-06	Stx17	syntaxin 17 [Source:MGI Symbol;Acc:MGI:1914977]
ENSMUSG00000003644	145.037	100.856	95.4029	91.6808	217.855	204.057	255.639	180.181	214.433	108.244	-0.991032	3.84423e-06	Rps6ka1	ribosomal protein S6 kinase polypeptide 1 [Source:MGI Symbol;Acc:MGI:104558]
ENSMUSG00000020832	986.476	944.123	911.046	1051.46	715.275	713.815	749.731	712.424	722.811	973.277	0.429472	3.85438e-06	Eral1	Era (G-protein)-like 1 (E. coli) [Source:MGI Symbol;Acc:MGI:1889295]
ENSMUSG00000032633	5869.03	4806.06	4470.31	5287.88	3838.18	2621.17	3162.19	2600.76	3055.57	5108.32	0.741335	3.85443e-06	Flcn	folliculin [Source:MGI Symbol;Acc:MGI:2442184]
ENSMUSG00000032115	906.76	946.925	891.126	940.683	1801.75	1478.45	3108.48	1479.38	1967.01	921.374	-1.09483	3.91894e-06	Hyou1	hypoxia up-regulated 1 [Source:MGI Symbol;Acc:MGI:108030]
ENSMUSG00000042492	579.042	528.093	550.402	509.974	844.305	874.75	975.294	679.233	843.396	541.878	-0.640867	3.98364e-06	Tbc1d10b	TBC1 domain family, member 10b [Source:MGI Symbol;Acc:MGI:1915699]
ENSMUSG00000038668	166.073	205.914	198.145	156.621	284.24	286.45	291.443	355.619	304.438	181.688	-0.745753	3.98393e-06	Lpar1	lysophosphatidic acid receptor 1 [Source:MGI Symbol;Acc:MGI:108429]
ENSMUSG00000043962	5647.6	5559.68	5370.87	5607.81	4390.76	4106.55	4431.07	3664.07	4148.11	5546.49	0.418544	4.18538e-06	Thrap3	thyroid hormone receptor associated protein 3 [Source:MGI Symbol;Acc:MGI:2442637]
ENSMUSG00000036819	437.326	386.614	425.644	441.214	574.09	580.6	621.553	579.66	588.976	422.7	-0.476723	4.19647e-06	Jmjd4	jumonji domain containing 4 [Source:MGI Symbol;Acc:MGI:2144404]
ENSMUSG00000037049	7531.98	8316.41	7988.69	8297.11	6699.28	6222.59	6017.18	6155.77	6273.7	8033.55	0.356736	4.21972e-06	Smpd1	sphingomyelin phosphodiesterase 1, acid lysosomal [Source:MGI Symbol;Acc:MGI:98325]
ENSMUSG00000025417	2528.74	2318.28	2356.77	2240.45	1685.81	1635.54	1828.14	1894.27	1760.94	2361.06	0.423702	4.24267e-06	Pip4k2c	phosphatidylinositol-5-phosphate 4-kinase, type II, gamma [Source:MGI Symbol;Acc:MGI:2152214]
ENSMUSG00000004558	60477.3	58486.6	59121.5	60817.8	48460.1	43929.3	47423.5	39844.8	44914.4	59725.8	0.411136	4.24823e-06	Ndrg2	N-myc downstream regulated gene 2 [Source:MGI Symbol;Acc:MGI:1352498]
ENSMUSG00000050721	214.788	273.151	264.193	241.617	355.3	397.334	508.413	410.148	417.799	248.437	-0.75373	4.24823e-06	Plekho2	pleckstrin homology domain containing, family O member 2 [Source:MGI Symbol;Acc:MGI:2143132]
ENSMUSG00000000276	897.903	617.742	726.53	597.835	1167.82	1176.6	1142.86	1088.2	1143.87	710.003	-0.68792	4.25808e-06	Dgke	diacylglycerol kinase, epsilon [Source:MGI Symbol;Acc:MGI:1889276]
ENSMUSG00000041798	466.113	655.563	804.11	493.739	2064.48	1353.71	1208.02	951.875	1394.52	604.881	-1.20563	4.25808e-06	Gck	glucokinase [Source:MGI Symbol;Acc:MGI:1270854]
ENSMUSG00000024483	2144.56	2594.24	2484.67	2696.94	1728.82	1848.06	1846.04	1697.49	1780.1	2480.1	0.477823	4.28906e-06	Ankhd1	ankyrin repeat and KH domain containing 1 [Source:MGI Symbol;Acc:MGI:1921733]
ENSMUSG00000025198	169.395	218.521	213.87	232.067	320.705	318.021	375.939	336.653	337.83	208.463	-0.696989	4.31889e-06	Erlin1	ER lipid raft associated 1 [Source:MGI Symbol;Acc:MGI:2387613]
ENSMUSG00000028975	649.9	588.326	588.143	602.61	445.06	455.856	442.534	435.041	444.623	607.245	0.449272	4.35254e-06	Pex14	peroxisomal biogenesis factor 14 [Source:MGI Symbol;Acc:MGI:1927868]
ENSMUSG00000033793	1057.33	1306.92	1279.03	1430.6	827.475	703.804	905.835	845.189	820.576	1268.47	0.628842	4.3697e-06	Atp6v1h	ATPase, H+ transporting, lysosomal V1 subunit H [Source:MGI Symbol;Acc:MGI:1914864]
ENSMUSG00000051499	13.2859	1.40078	12.5806	6.68506	44.88	38.5013	39.3841	34.3765	39.2855	8.48808	-2.17494	4.42155e-06	Zfp786	zinc finger protein 786 [Source:MGI Symbol;Acc:MGI:3026883]
ENSMUSG00000014496	1856.7	2074.55	2254.03	2201.29	1304.33	1259.76	1444.32	1640.59	1412.25	2096.64	0.571408	4.44082e-06	Ankrd28	ankyrin repeat domain 28 [Source:MGI Symbol;Acc:MGI:2145661]
ENSMUSG00000059273	2318.38	2075.95	1967.82	2180.28	1568	1542.36	1684.21	1415.37	1552.48	2135.61	0.459052	4.4692e-06	Zc3h4	zinc finger CCCH-type containing 4 [Source:MGI Symbol;Acc:MGI:2682314]
ENSMUSG00000060733	492.684	452.451	435.079	471.774	647.955	633.732	637.307	612.851	632.961	462.997	-0.451308	4.4692e-06	Ipmk	inositol polyphosphate multikinase [Source:MGI Symbol;Acc:MGI:1916968]
ENSMUSG00000009563	198.181	145.681	139.435	197.687	281.435	286.45	335.839	290.423	298.537	170.246	-0.807337	4.49339e-06	Tor2a	torsin family 2, member A [Source:MGI Symbol;Acc:MGI:1353596]
ENSMUSG00000021709	2551.99	3363.26	3320.23	3425.61	1672.72	1603.2	1906.19	2366.05	1887.04	3165.28	0.74698	4.51016e-06	Erbin	Erbb2 interacting protein [Source:MGI Symbol;Acc:MGI:1890169]
ENSMUSG00000015165	5032.02	3569.18	4014.26	4536.29	6529.11	7711.82	6823.48	5885.5	6737.48	4287.94	-0.651836	4.53028e-06	Hnrnpl	heterogeneous nuclear ribonucleoprotein L [Source:MGI Symbol;Acc:MGI:104816]
ENSMUSG00000029190	4858.2	5696.96	5755.63	5712.86	4089.69	4074.98	3712.85	4291.14	4042.17	5505.91	0.446221	4.5568e-06	D5Ertd579e	DNA segment, Chr 5, ERATO Doi 579, expressed [Source:MGI Symbol;Acc:MGI:1261849]
ENSMUSG00000040640	112.93	70.0388	92.2578	65.8956	23.375	30.031	40.1002	35.5619	32.2671	85.2805	1.40038	4.56056e-06	Erc2	ELKS/RAB6-interacting/CAST family member 2 [Source:MGI Symbol;Acc:MGI:1098749]
ENSMUSG00000019066	1061.76	1102.41	922.578	994.164	707.795	780.037	709.63	749.172	736.659	1020.23	0.468543	4.56324e-06	Rab3d	RAB3D, member RAS oncogene family [Source:MGI Symbol;Acc:MGI:97844]
ENSMUSG00000041241	2544.24	2776.34	2770.88	2830.64	2231.85	2061.36	1959.18	2100.53	2088.23	2730.53	0.387473	4.5677e-06	Mul1	mitochondrial ubiquitin ligase activator of NFKB 1 [Source:MGI Symbol;Acc:MGI:1915600]
ENSMUSG00000041926	507.077	491.672	542.014	494.694	821.865	744.616	850.697	637.744	763.731	508.865	-0.587636	4.57329e-06	Rnpep	arginyl aminopeptidase (aminopeptidase B) [Source:MGI Symbol;Acc:MGI:2384902]
ENSMUSG00000114069	217.002	278.754	321.854	187.182	136.51	117.814	136.054	120.911	127.822	251.198	0.971293	4.58402e-06	E130119H09Rik	RIKEN cDNA E130119H09 gene [Source:MGI Symbol;Acc:MGI:1925800]
ENSMUSG00000049580	22.1431	26.6147	50.3224	32.4703	83.215	85.473	110.276	77.0509	89.0036	32.8876	-1.43124	4.59141e-06	Tsku	tsukushi, small leucine rich proteoglycan [Source:MGI Symbol;Acc:MGI:2443855]
ENSMUSG00000082361	16.6073	23.8132	16.7741	28.6503	67.32	56.982	61.5824	50.9721	59.2141	21.4612	-1.46531	4.59255e-06	Btc	betacellulin, epidermal growth factor family member [Source:MGI Symbol;Acc:MGI:99439]
ENSMUSG00000048612	265.717	215.72	283.064	238.752	347.82	418.125	530.612	456.378	438.234	250.813	-0.803887	4.6e-06	Myof	myoferlin [Source:MGI Symbol;Acc:MGI:1919192]
ENSMUSG00000030123	3135.46	2512.99	2458.46	2292.02	5194.86	4519.29	3767.99	3675.92	4289.51	2599.73	-0.72261	4.60159e-06	Plxnd1	plexin D1 [Source:MGI Symbol;Acc:MGI:2154244]
ENSMUSG00000049537	2815.5	3406.69	3457.57	3034.06	2379.58	2115.26	2296.45	2344.72	2284	3178.45	0.476784	4.61575e-06	Tecrl	trans-2,3-enoyl-CoA reductase-like [Source:MGI Symbol;Acc:MGI:2444966]
ENSMUSG00000024006	1258.84	1015.56	1092.42	1218.59	1894.31	1881.18	1972.79	1422.48	1792.69	1146.35	-0.645349	4.62591e-06	Stk38	serine/threonine kinase 38 [Source:MGI Symbol;Acc:MGI:2442572]
ENSMUSG00000020611	1667.38	1608.09	1641.77	1622.56	1223.92	1087.28	1285.35	1287.34	1220.97	1634.95	0.422211	4.63753e-06	Gna13	guanine nucleotide binding protein, alpha 13 [Source:MGI Symbol;Acc:MGI:95768]
ENSMUSG00000036565	366.469	218.521	297.741	249.257	506.77	592.921	640.171	427.929	541.948	282.997	-0.937757	4.63753e-06	Ttyh3	tweety family member 3 [Source:MGI Symbol;Acc:MGI:1925589]
ENSMUSG00000042686	1360.69	1616.5	1598.79	1384.76	1037.85	1087.28	1070.53	873.638	1017.32	1490.18	0.548229	4.67483e-06	Jph1	junctophilin 1 [Source:MGI Symbol;Acc:MGI:1891495]
ENSMUSG00000019210	4250.37	4684.19	4568.86	4272.71	3569.83	3554.44	3556.03	3515.89	3549.05	4444.03	0.323946	4.67483e-06	Atp6v1e1	ATPase, H+ transporting, lysosomal V1 subunit E1 [Source:MGI Symbol;Acc:MGI:894326]
ENSMUSG00000005873	6727.08	7660.84	7233.85	6631.58	9740.84	10022.7	8566.41	10196.8	9631.68	7063.34	-0.447497	4.68634e-06	Reep5	receptor accessory protein 5 [Source:MGI Symbol;Acc:MGI:1270152]
ENSMUSG00000031990	202.609	176.498	164.596	147.071	302.94	348.822	250.626	297.535	299.981	172.694	-0.798898	4.71563e-06	Jam3	junction adhesion molecule 3 [Source:MGI Symbol;Acc:MGI:1933825]
ENSMUSG00000032511	17939.2	19192	17490.2	17415.5	12385	12425.9	13976.4	9810.36	12149.4	18009.2	0.567599	4.74715e-06	Scn5a	sodium channel, voltage-gated, type V, alpha [Source:MGI Symbol;Acc:MGI:98251]
ENSMUSG00000051457	5.53578	8.40466	10.4838	4.77504	27.115	30.031	47.2609	32.0058	34.1032	7.29983	-2.24474	4.75809e-06	Spn	sialophorin [Source:MGI Symbol;Acc:MGI:98384]
ENSMUSG00000057789	383.076	406.225	391.047	424.979	586.245	565.2	633.726	520.39	576.39	401.332	-0.524603	4.82631e-06	Bak1	BCL2-antagonist/killer 1 [Source:MGI Symbol;Acc:MGI:1097161]
ENSMUSG00000031232	917.832	1276.11	1289.51	1103.99	1710.12	1637.08	2213.39	2003.32	1890.98	1146.86	-0.721943	4.86939e-06	Magt1	magnesium transporter 1 [Source:MGI Symbol;Acc:MGI:1914325]
ENSMUSG00000026466	4512.77	4405.44	4258.54	4058.79	3519.34	3409.68	3308.27	3134.19	3342.87	4308.88	0.365603	4.87997e-06	Tor1aip1	torsin A interacting protein 1 [Source:MGI Symbol;Acc:MGI:3582693]
ENSMUSG00000033191	3097.82	2011.51	2151.28	1951.08	5146.24	4261.33	5021.12	3181.61	4402.57	2302.93	-0.935071	4.90504e-06	Tie1	tyrosine kinase with immunoglobulin-like and EGF-like domains 1 [Source:MGI Symbol;Acc:MGI:99906]
ENSMUSG00000030554	244.681	240.933	279.918	243.527	480.59	418.125	335.839	418.446	413.25	252.265	-0.708975	4.93677e-06	Synm	synemin, intermediate filament protein [Source:MGI Symbol;Acc:MGI:2661187]
ENSMUSG00000028381	975.404	1116.42	1186.77	1229.1	813.45	710.735	816.325	791.846	783.089	1126.92	0.526137	5.04893e-06	Ugcg	UDP-glucose ceramide glucosyltransferase [Source:MGI Symbol;Acc:MGI:1332243]
ENSMUSG00000026816	332.147	282.957	333.386	291.278	503.965	439.685	461.868	433.856	459.844	309.942	-0.567928	5.10735e-06	Gtf3c5	general transcription factor IIIC, polypeptide 5 [Source:MGI Symbol;Acc:MGI:1917489]
ENSMUSG00000095041	982.047	712.995	824.03	473.684	1779.31	1965.11	1609.74	1121.39	1618.88	748.189	-1.11443	5.16287e-06	AC149090.1
ENSMUSG00000027996	35.429	15.4085	27.258	13.3701	82.28	100.103	47.977	98.388	82.1871	22.8664	-1.83783	5.20647e-06	Sfrp2	secreted frizzled-related protein 2 [Source:MGI Symbol;Acc:MGI:108078]
ENSMUSG00000042293	356.504	355.797	423.547	431.664	257.125	231.008	232.724	283.31	251.042	391.878	0.650532	5.25658e-06	Gm5617	predicted gene 5617 [Source:MGI Symbol;Acc:MGI:3643566]
ENSMUSG00000037624	25.4646	28.0155	29.3547	25.7852	69.19	75.4626	50.8413	84.1633	69.9143	27.155	-1.35722	5.30761e-06	Kcnk2	potassium channel, subfamily K, member 2 [Source:MGI Symbol;Acc:MGI:109366]
ENSMUSG00000040987	292.289	264.747	273.628	185.272	575.025	520.538	427.497	384.069	476.782	253.984	-0.911768	5.31459e-06	Mill2	MHC I like leukocyte 2 [Source:MGI Symbol;Acc:MGI:2179989]
ENSMUSG00000034116	31.0004	30.8171	28.3064	32.4703	73.865	77.0027	245.614	91.2757	121.939	30.6485	-1.99692	5.31459e-06	Vav1	vav 1 oncogene [Source:MGI Symbol;Acc:MGI:98923]
ENSMUSG00000033318	324.397	295.564	297.741	270.267	458.15	550.569	490.511	392.367	472.899	296.992	-0.675546	5.32233e-06	Gstt2	glutathione S-transferase, theta 2 [Source:MGI Symbol;Acc:MGI:106188]
ENSMUSG00000033059	44694.8	44058.6	40593.4	40967	33300	34206.1	32936.6	29291.2	32433.5	42578.4	0.392542	5.34544e-06	Pygb	brain glycogen phosphorylase [Source:MGI Symbol;Acc:MGI:97828]
ENSMUSG00000054619	2268.56	2312.68	2464.75	2531.73	1783.98	1846.52	1666.31	1928.64	1806.36	2394.43	0.408039	5.34991e-06	Mettl7a1	methyltransferase like 7A1 [Source:MGI Symbol;Acc:MGI:1916523]
ENSMUSG00000042211	1339.66	1410.58	1322.01	1376.17	974.271	1091.13	1069.1	1045.52	1045	1362.1	0.381048	5.38312e-06	Fbxo38	F-box protein 38 [Source:MGI Symbol;Acc:MGI:2444639]
ENSMUSG00000020137	187.109	231.128	263.144	245.437	445.995	337.272	370.927	400.665	388.715	231.705	-0.743259	5.41127e-06	Thap2	THAP domain containing, apoptosis associated protein 2 [Source:MGI Symbol;Acc:MGI:1914066]
ENSMUSG00000031204	204.824	183.502	183.467	196.732	340.34	280.29	279.985	301.091	300.427	192.131	-0.641122	5.44441e-06	Asb12	ankyrin repeat and SOCS box-containing 12 [Source:MGI Symbol;Acc:MGI:1917642]
ENSMUSG00000090035	147.252	103.657	116.371	129.881	206.635	198.667	219.835	216.928	210.516	124.29	-0.753818	5.64791e-06	Galnt4	polypeptide N-acetylgalactosaminyltransferase 4 [Source:MGI Symbol;Acc:MGI:894692]
ENSMUSG00000014453	39.8576	49.0272	70.2417	37.2453	110.33	123.974	104.547	104.315	110.792	49.093	-1.17733	5.6641e-06	Blk	B lymphoid kinase [Source:MGI Symbol;Acc:MGI:88169]
ENSMUSG00000070873	7.75009	25.214	25.1612	34.3803	74.8	73.1525	70.8914	78.2363	74.2701	23.1264	-1.67437	5.6976e-06	Lilra5	leukocyte immunoglobulin-like receptor, subfamily A (with TM domain), member 5 [Source:MGI Symbol;Acc:MGI:3647196]
ENSMUSG00000078771	19.9288	21.0116	20.9677	9.55008	35.53	65.4523	116.72	75.8655	73.392	17.8646	-2.05473	5.7085e-06	Evi2a	ecotropic viral integration site 2a [Source:MGI Symbol;Acc:MGI:95458]
ENSMUSG00000069919	716.33	862.878	1743.46	641.766	4060.71	4202.04	2486.93	5480.1	4057.44	991.109	-2.03329	5.71289e-06	Hba-a1	hemoglobin alpha, adult chain 1 [Source:MGI Symbol;Acc:MGI:96015]
ENSMUSG00000003435	4347.8	3919.37	3893.7	3829.58	2942.45	2969.22	3008.95	2379.09	2824.93	3997.61	0.500072	5.75513e-06	Supt5	suppressor of Ty 5 [Source:MGI Symbol;Acc:MGI:1202400]
ENSMUSG00000035011	1412.73	1413.38	1373.38	1424.87	2091.6	2324.71	2092.37	1679.71	2047.1	1406.09	-0.543054	5.76874e-06	Zbtb7a	zinc finger and BTB domain containing 7a [Source:MGI Symbol;Acc:MGI:1335091]
ENSMUSG00000025591	377.54	435.641	412.015	409.699	302.94	271.049	273.541	284.496	283.006	408.724	0.530704	5.77503e-06	Tma16	translation machinery associated 16 [Source:MGI Symbol;Acc:MGI:1913532]
ENSMUSG00000005615	4749.7	5058.2	5305.87	5231.54	4093.43	4042.64	3551.73	3728.08	3853.97	5086.33	0.400395	5.77503e-06	Pcyt1a	phosphate cytidylyltransferase 1, choline, alpha isoform [Source:MGI Symbol;Acc:MGI:88557]
ENSMUSG00000020312	71.9651	61.6341	62.903	69.7156	115.005	125.514	120.301	125.652	121.618	66.5545	-0.865309	5.80979e-06	Shc2	SHC (Src homology 2 domain containing) transforming protein 2 [Source:MGI Symbol;Acc:MGI:106180]
ENSMUSG00000025533	359.826	505.68	275.725	549.13	170.17	203.287	226.996	201.518	200.493	422.59	1.07386	5.84176e-06	Asl	argininosuccinate lyase [Source:MGI Symbol;Acc:MGI:88084]
ENSMUSG00000024780	6559.9	9780.22	8448.93	8897.81	5801.68	5281.61	5586.82	5347.33	5504.36	8421.71	0.613406	5.895e-06	Cdc37l1	cell division cycle 37-like 1 [Source:MGI Symbol;Acc:MGI:1914322]
ENSMUSG00000011256	2565.28	3076.1	2346.28	1935.8	1395.02	652.983	1007.52	1443.81	1124.83	2480.87	1.14187	5.91238e-06	Adam19	a disintegrin and metallopeptidase domain 19 (meltrin beta) [Source:MGI Symbol;Acc:MGI:105377]
ENSMUSG00000015971	1872.2	1821.01	1828.38	1855.58	1357.62	1323.68	1448.62	1097.68	1306.9	1844.29	0.495087	6.01054e-06	Actr8	ARP8 actin-related protein 8 [Source:MGI Symbol;Acc:MGI:1860775]
ENSMUSG00000044674	173.823	177.899	198.145	173.812	275.825	255.649	286.43	301.091	279.749	180.92	-0.62574	6.01054e-06	Fzd1	frizzled class receptor 1 [Source:MGI Symbol;Acc:MGI:1196625]
ENSMUSG00000078919	366.469	275.953	306.128	362.903	197.285	209.447	181.167	130.394	179.573	327.863	0.864365	6.0544e-06	Dpm1	dolichol-phosphate (beta-D) mannosyltransferase 1 [Source:MGI Symbol;Acc:MGI:1330239]
ENSMUSG00000053964	1251.09	708.793	789.433	1190.9	2399.21	3257.98	2517.72	1324.09	2374.75	985.052	-1.26936	6.07043e-06	Lgals4	lectin, galactose binding, soluble 4 [Source:MGI Symbol;Acc:MGI:107536]
ENSMUSG00000044933	50.9292	54.6303	61.8546	63.0306	159.885	156.315	103.831	98.388	129.605	57.6112	-1.16895	6.10334e-06	Sstr3	somatostatin receptor 3 [Source:MGI Symbol;Acc:MGI:98329]
ENSMUSG00000046111	356.504	376.809	397.337	456.494	177.65	248.719	223.415	275.012	231.199	396.786	0.783324	6.10576e-06	Cep295	centrosomal protein 295 [Source:MGI Symbol;Acc:MGI:2442521]
ENSMUSG00000024528	398.576	421.634	362.741	367.678	267.41	267.969	274.973	246.563	264.229	387.657	0.546822	6.10667e-06	Srfbp1	serum response factor binding protein 1 [Source:MGI Symbol;Acc:MGI:1914472]
ENSMUSG00000039756	1362.91	1699.14	1602.98	1856.54	1124.81	1061.87	1188.68	1047.89	1105.81	1630.39	0.559643	6.10835e-06	Dnttip2	deoxynucleotidyltransferase, terminal, interacting protein 2 [Source:MGI Symbol;Acc:MGI:1923173]
ENSMUSG00000027848	391.933	329.182	321.854	263.582	498.355	564.43	484.067	597.441	536.073	326.638	-0.715077	6.33264e-06	Olfml3	olfactomedin-like 3 [Source:MGI Symbol;Acc:MGI:1914877]
ENSMUSG00000075054	602.293	799.843	876.449	679.966	1197.74	1207.4	1049.77	1442.63	1224.38	739.638	-0.726598	6.38747e-06	Yae1d1	Yae1 domain containing 1 [Source:MGI Symbol;Acc:MGI:1914258]
ENSMUSG00000025139	3446.58	3363.26	3558.21	3362.58	2857.36	2645.81	2667.38	2435.99	2651.64	3432.66	0.372005	6.4043e-06	Tollip	toll interacting protein [Source:MGI Symbol;Acc:MGI:1891808]
ENSMUSG00000022305	109.608	107.86	105.887	100.276	160.82	170.176	214.106	189.664	183.692	105.908	-0.797792	6.422e-06	Lrp12	low density lipoprotein-related protein 12 [Source:MGI Symbol;Acc:MGI:2443132]
ENSMUSG00000031770	26830.8	24233.4	24730.3	23791.2	15719.2	14426.5	15515.2	8326.24	13496.8	24896.4	0.883199	6.43141e-06	Herpud1	homocysteine-inducible, endoplasmic reticulum stress-inducible, ubiquitin-like domain member 1 [Source:MGI Symbol;Acc:MGI:1927406]
ENSMUSG00000030208	1147.01	1430.19	1378.62	1186.12	2005.58	1781.07	2589.33	1908.49	2071.12	1285.49	-0.689206	6.43446e-06	Emp1	epithelial membrane protein 1 [Source:MGI Symbol;Acc:MGI:107941]
ENSMUSG00000104348	177.145	189.105	187.661	149.936	321.64	281.83	259.219	272.642	283.833	175.962	-0.693034	6.43446e-06	Gm37691	predicted gene, 37691 [Source:MGI Symbol;Acc:MGI:5610919]
ENSMUSG00000020921	281.218	291.361	318.709	338.073	445.995	429.675	441.818	467.047	446.134	307.34	-0.532835	6.47168e-06	Tmem101	transmembrane protein 101 [Source:MGI Symbol;Acc:MGI:1923797]
ENSMUSG00000107331	114.037	114.864	95.4029	84.0407	199.155	187.116	166.845	167.141	180.065	102.086	-0.827372	6.4837e-06	Gm42732	predicted gene 42732 [Source:MGI Symbol;Acc:MGI:5662869]
ENSMUSG00000041453	9984.33	11032.5	10141	10498.4	7605.29	8161.51	8131.75	8653.41	8137.99	10414.1	0.355804	6.49226e-06	Rpl21	ribosomal protein L21 [Source:MGI Symbol;Acc:MGI:1278340]
ENSMUSG00000054404	2527.64	2442.95	2366.2	2233.76	3871.84	3399.67	3107.77	3079.66	3364.73	2392.64	-0.492231	6.50187e-06	Slfn5	schlafen 5 [Source:MGI Symbol;Acc:MGI:1329004]
ENSMUSG00000031984	3522.97	4212.13	4239.66	3774.19	2859.23	2964.6	2902.97	3019.21	2936.5	3937.24	0.42293	6.61686e-06	2810004N23Rik	RIKEN cDNA 2810004N23 gene [Source:MGI Symbol;Acc:MGI:1913773]
ENSMUSG00000018398	1628.63	1350.35	1314.67	1255.84	2473.08	2667.37	2451.12	1706.97	2324.64	1387.37	-0.745522	6.81027e-06	2021-09-08	septin 8 [Source:MGI Symbol;Acc:MGI:894310]
ENSMUSG00000105843	93.0011	84.0466	101.693	76.4007	44.88	33.8812	39.3841	16.5956	33.6852	88.7854	1.37824	6.86219e-06	Gm19439	predicted gene, 19439 [Source:MGI Symbol;Acc:MGI:5011624]
ENSMUSG00000062376	571.292	525.291	547.256	589.24	405.79	425.055	375.939	347.322	388.527	558.27	0.521576	7.00305e-06	Borcs7	BLOC-1 related complex subunit 7 [Source:MGI Symbol;Acc:MGI:1913689]
ENSMUSG00000036594	469.434	404.824	336.531	129.881	1368.84	1151.19	1334.05	1109.53	1240.9	335.168	-1.8897	7.01216e-06	H2-Aa	histocompatibility 2, class II antigen A, alpha [Source:MGI Symbol;Acc:MGI:95895]
ENSMUSG00000005886	2374.85	2842.17	2992.09	2627.23	1763.41	1911.21	1915.5	2089.86	1919.99	2709.08	0.496979	7.09961e-06	Ncoa2	nuclear receptor coactivator 2 [Source:MGI Symbol;Acc:MGI:1276533]
ENSMUSG00000032370	492.684	602.334	551.45	495.649	737.715	783.887	768.348	721.907	752.965	535.529	-0.495797	7.09961e-06	Lactb	lactamase, beta [Source:MGI Symbol;Acc:MGI:1933395]
ENSMUSG00000057181	1958.56	2339.3	2270.8	2176.46	1473.56	1506.17	1398.49	1762.69	1535.23	2186.28	0.511093	7.17461e-06	5730455P16Rik	RIKEN cDNA 5730455P16 gene [Source:MGI Symbol;Acc:MGI:1917841]
ENSMUSG00000057101	477.184	502.879	543.063	521.435	764.83	669.153	688.864	707.683	707.633	511.14	-0.467413	7.25802e-06	Zfp180	zinc finger protein 180 [Source:MGI Symbol;Acc:MGI:1923701]
ENSMUSG00000024548	550.256	818.053	829.272	791.702	322.575	522.848	380.236	375.771	400.358	747.321	0.898694	7.30671e-06	Setbp1	SET binding protein 1 [Source:MGI Symbol;Acc:MGI:1933199]
ENSMUSG00000036158	577.935	368.404	472.821	424.024	820.93	906.321	923.021	631.817	820.522	460.796	-0.832786	7.36909e-06	Prickle1	prickle planar cell polarity protein 1 [Source:MGI Symbol;Acc:MGI:1916034]
ENSMUSG00000021339	1143.69	1332.14	1298.95	1314.09	1830.73	1673.27	1646.97	1666.67	1704.41	1272.22	-0.42205	7.38569e-06	Mrs2	MRS2 magnesium transporter [Source:MGI Symbol;Acc:MGI:2685748]
ENSMUSG00000050912	1296.48	1479.22	1573.62	1294.04	1932.65	1921.22	1899.75	2175.21	1982.2	1410.84	-0.490326	7.38569e-06	Tmem123	transmembrane protein 123 [Source:MGI Symbol;Acc:MGI:1919179]
ENSMUSG00000024975	499.327	486.069	457.095	466.999	689.095	596.001	696.025	691.087	668.052	477.373	-0.484655	7.39116e-06	Pdcd4	programmed cell death 4 [Source:MGI Symbol;Acc:MGI:107490]
ENSMUSG00000022442	3131.04	4069.25	3745.88	3440.9	2700.28	2359.36	2030.07	2465.63	2388.84	3596.77	0.590556	7.39279e-06	Ttll1	tubulin tyrosine ligase-like 1 [Source:MGI Symbol;Acc:MGI:2443047]
ENSMUSG00000036264	292.289	299.766	405.725	234.932	192.61	86.243	82.3486	62.8261	106.007	308.178	1.53882	7.41404e-06	Fstl4	follistatin-like 4 [Source:MGI Symbol;Acc:MGI:2443199]
ENSMUSG00000100183	69.7508	28.0155	42.9837	56.3455	11.22	16.1706	13.6054	15.4102	14.1015	49.2739	1.81465	7.50884e-06	Gm28512	predicted gene 28512 [Source:MGI Symbol;Acc:MGI:5579218]
ENSMUSG00000032513	1349.62	1469.41	1421.61	1363.75	1104.24	1111.92	1078.41	1104.79	1099.84	1401.1	0.348583	7.56654e-06	Gorasp1	golgi reassembly stacking protein 1 [Source:MGI Symbol;Acc:MGI:1921748]
ENSMUSG00000049097	24.3574	12.607	24.1128	16.2351	57.035	60.8321	43.6806	67.5677	57.2789	19.3281	-1.54692	7.57699e-06	Ankrd34a	ankyrin repeat domain 34A [Source:MGI Symbol;Acc:MGI:3617846]
ENSMUSG00000036022	385.29	369.805	379.515	530.03	138.38	214.837	146.079	272.642	192.985	416.16	1.11508	7.60135e-06	Fam122b	family with sequence similarity 122, member B [Source:MGI Symbol;Acc:MGI:1926005]
ENSMUSG00000022462	8074.49	12566.4	8816.91	10995	6602.97	6244.15	6145.36	4933.63	5981.53	10113.2	0.757393	7.60135e-06	Slc38a2	solute carrier family 38, member 2 [Source:MGI Symbol;Acc:MGI:1915010]
ENSMUSG00000028807	60.8936	40.6225	54.516	45.8404	98.1751	120.124	93.8058	105.5	104.401	50.4681	-1.04267	7.61772e-06	Zbtb8a	zinc finger and BTB domain containing 8a [Source:MGI Symbol;Acc:MGI:1920930]
ENSMUSG00000061136	1636.38	2075.95	2003.46	2113.43	1109.85	1077.27	1340.49	1456.85	1246.11	1957.31	0.652215	7.72171e-06	Prpf40a	pre-mRNA processing factor 40A [Source:MGI Symbol;Acc:MGI:1860512]
ENSMUSG00000066113	48.7148	36.4202	37.7418	25.7852	89.7601	82.3929	77.3361	88.9049	84.5985	37.1655	-1.18992	7.77932e-06	Adamtsl1	ADAMTS-like 1 [Source:MGI Symbol;Acc:MGI:1924989]
ENSMUSG00000024083	6512.29	8124.5	7674.17	7252.33	5219.17	5297.01	5465.8	5781.19	5440.79	7390.82	0.441892	7.81554e-06	Pja2	praja ring finger ubiquitin ligase 2 [Source:MGI Symbol;Acc:MGI:2159342]
ENSMUSG00000024081	1168.05	1178.05	1197.25	1122.13	904.146	912.482	922.305	925.796	916.182	1166.37	0.347984	7.85225e-06	Cebpz	CCAAT/enhancer binding protein zeta [Source:MGI Symbol;Acc:MGI:109386]
ENSMUSG00000041390	348.754	388.015	378.467	361.948	545.105	467.406	593.626	591.514	549.413	369.296	-0.572885	7.95429e-06	Mdfic	MyoD family inhibitor domain containing [Source:MGI Symbol;Acc:MGI:104611]
ENSMUSG00000074922	608.936	703.19	611.208	691.426	425.425	425.055	508.413	430.3	447.298	653.69	0.544418	7.96785e-06	Fam122a	family with sequence similarity 122, member A [Source:MGI Symbol;Acc:MGI:1915284]
ENSMUSG00000037813	210.36	193.307	166.693	154.711	379.61	386.553	278.553	272.642	329.34	181.268	-0.865894	8.01265e-06	D630003M21Rik	RIKEN cDNA D630003M21 gene [Source:MGI Symbol;Acc:MGI:3606579]
ENSMUSG00000002968	3644.76	3342.25	3454.42	3249.89	2647.92	2625.02	2748.3	2342.35	2590.9	3422.83	0.400865	8.19932e-06	Med25	mediator complex subunit 25 [Source:MGI Symbol;Acc:MGI:1922863]
ENSMUSG00000099812	32.1075	19.6109	18.8709	22.9202	2.805	4.62016	1.43215	5.92699	3.69608	23.3774	2.72263	8.29422e-06	Gm28515	predicted gene 28515 [Source:MGI Symbol;Acc:MGI:5579221]
ENSMUSG00000031398	25.4646	15.4085	15.7258	21.0102	47.685	60.0621	68.0271	46.2305	55.5012	19.4023	-1.51662	8.30326e-06	Plxna3	plexin A3 [Source:MGI Symbol;Acc:MGI:107683]
ENSMUSG00000105096	260.182	254.941	251.612	212.967	107.525	53.1318	140.351	48.6013	87.4022	244.925	1.47788	8.33048e-06	Gbp10	guanylate-binding protein 10 [Source:MGI Symbol;Acc:MGI:4359647]
ENSMUSG00000051940	6.64293	16.8093	15.7258	6.68506	0	0	0	0	0	11.4658	6.12889	8.51184e-06	5031410I06Rik	RIKEN cDNA 5031410I06 gene [Source:MGI Symbol;Acc:MGI:3036277]
ENSMUSG00000022982	7760.05	8569.95	8187.88	8362.05	6622.61	6737.73	6766.19	6696.31	6705.71	8219.98	0.293565	8.54166e-06	Sod1	superoxide dismutase 1, soluble [Source:MGI Symbol;Acc:MGI:98351]
ENSMUSG00000038876	500.434	616.341	624.837	674.236	369.325	321.101	361.618	448.081	375.031	603.962	0.691897	8.57787e-06	Rnf146	ring finger protein 146 [Source:MGI Symbol;Acc:MGI:1915281]
ENSMUSG00000027715	8.85724	4.20233	10.4838	8.59508	34.595	37.7313	48.6931	22.5226	35.8855	8.03462	-2.14489	8.5831e-06	Ccna2	cyclin A2 [Source:MGI Symbol;Acc:MGI:108069]
ENSMUSG00000022555	917.832	987.547	976.045	1024.72	756.415	679.934	767.632	689.902	723.471	976.537	0.431981	8.61955e-06	Dgat1	diacylglycerol O-acyltransferase 1 [Source:MGI Symbol;Acc:MGI:1333825]
ENSMUSG00000036672	57.5721	71.4396	64.9998	63.0306	138.38	147.075	157.536	91.2757	133.567	64.2605	-1.0682	8.64827e-06	Cenpt	centromere protein T [Source:MGI Symbol;Acc:MGI:2443939]
ENSMUSG00000030417	2172.24	2793.15	2555.96	2832.55	1680.2	1704.84	1787.32	1967.76	1785.03	2588.48	0.536617	8.73304e-06	Pdcd5	programmed cell death 5 [Source:MGI Symbol;Acc:MGI:1913538]
ENSMUSG00000029003	359.826	371.206	295.644	346.668	210.375	204.057	237.737	237.08	222.312	343.336	0.626333	8.76116e-06	Mad2l2	MAD2 mitotic arrest deficient-like 2 [Source:MGI Symbol;Acc:MGI:1919140]
ENSMUSG00000022901	56.4649	47.6264	38.7902	42.0204	99.1101	80.8528	114.572	99.5734	98.5271	46.2255	-1.09689	8.94581e-06	Cd86	CD86 antigen [Source:MGI Symbol;Acc:MGI:101773]
ENSMUSG00000034161	533.649	798.442	630.079	463.179	316.03	147.075	325.098	264.344	263.137	606.337	1.2035	8.98655e-06	Scx	scleraxis [Source:MGI Symbol;Acc:MGI:102934]
ENSMUSG00000068036	2022.77	1662.72	1799.03	1602.5	3121.03	2246.17	2620.12	2907.78	2723.77	1771.76	-0.619892	8.98655e-06	Afdn	afadin, adherens junction formation factor [Source:MGI Symbol;Acc:MGI:1314653]
ENSMUSG00000046572	223.645	144.28	141.532	137.521	284.24	316.481	268.528	342.58	302.957	161.745	-0.903489	9.01063e-06	Zfp518b	zinc finger protein 518B [Source:MGI Symbol;Acc:MGI:2140750]
ENSMUSG00000039740	213.681	161.089	164.596	219.652	302.94	300.31	314.357	312.945	307.638	189.755	-0.691423	9.02365e-06	Alg2	asparagine-linked glycosylation 2 (alpha-1,3-mannosyltransferase) [Source:MGI Symbol;Acc:MGI:1914731]
ENSMUSG00000027304	2259.7	2307.08	2148.14	2186.97	1751.26	1771.83	1647.69	1467.52	1659.57	2225.47	0.421772	9.0546e-06	Rtf1	RTF1, Paf1/RNA polymerase II complex component [Source:MGI Symbol;Acc:MGI:1309480]
ENSMUSG00000031286	100.751	67.2372	103.79	79.2657	188.87	206.367	158.969	142.248	174.113	87.761	-0.985878	9.07478e-06	Glt28d2	glycosyltransferase 28 domain containing 2 [Source:MGI Symbol;Acc:MGI:2443773]
ENSMUSG00000019775	118.466	120.467	107.984	117.466	53.295	70.0724	49.4092	68.7531	60.3824	116.095	0.949019	9.08931e-06	Rgs17	regulator of G-protein signaling 17 [Source:MGI Symbol;Acc:MGI:1927469]
ENSMUSG00000035354	1178.01	1225.68	1154.27	1138.37	847.11	967.154	861.438	870.082	886.446	1174.08	0.403716	9.15826e-06	Uvrag	UV radiation resistance associated gene [Source:MGI Symbol;Acc:MGI:1925860]
ENSMUSG00000114073	5.53578	2.80155	5.24192	5.73005	18.7	30.031	26.4948	30.8204	26.5115	4.82732	-2.42453	9.1716e-06	Gm30302	predicted gene, 30302 [Source:MGI Symbol;Acc:MGI:5589461]
ENSMUSG00000025983	67.5365	53.2295	53.4676	59.2105	25.245	23.8708	26.4948	15.4102	22.7552	58.361	1.33882	9.1864e-06	Ccdc150	coiled-coil domain containing 150 [Source:MGI Symbol;Acc:MGI:1925266]
ENSMUSG00000026039	329.932	483.268	467.579	435.484	284.24	253.339	242.033	269.085	262.174	429.066	0.711427	9.20227e-06	Sgo2a	shugoshin 2A [Source:MGI Symbol;Acc:MGI:1098767]
ENSMUSG00000026958	95.2154	72.8404	79.6772	71.6256	148.665	156.315	146.795	125.652	144.357	79.8396	-0.85828	9.20227e-06	Dpp7	dipeptidylpeptidase 7 [Source:MGI Symbol;Acc:MGI:1933213]
ENSMUSG00000006219	4487.3	5362.17	5739.9	4445.56	8989.1	9045.5	6279.98	8003.81	8079.6	5008.73	-0.689885	9.23425e-06	Fblim1	filamin binding LIM protein 1 [Source:MGI Symbol;Acc:MGI:1921452]
ENSMUSG00000018923	80.8224	67.2372	82.8223	79.2657	124.355	130.905	152.524	161.214	142.249	77.5369	-0.86681	9.23851e-06	Med11	mediator complex subunit 11 [Source:MGI Symbol;Acc:MGI:1913422]
ENSMUSG00000021974	127.323	147.081	130	107.916	210.375	232.548	206.23	320.058	242.303	128.08	-0.919229	9.26016e-06	Fgf9	fibroblast growth factor 9 [Source:MGI Symbol;Acc:MGI:104723]
ENSMUSG00000025537	659.865	287.159	404.676	286.503	852.72	1160.43	747.582	1212.66	993.349	409.551	-1.27725	9.26397e-06	Phkg1	phosphorylase kinase gamma 1 [Source:MGI Symbol;Acc:MGI:97579]
ENSMUSG00000032410	1335.23	1697.74	1720.4	1676.99	982.686	920.952	982.455	1251.78	1034.47	1607.59	0.637682	9.48913e-06	Xrn1	5'-3' exoribonuclease 1 [Source:MGI Symbol;Acc:MGI:891964]
ENSMUSG00000036327	541.399	491.672	553.547	618.845	748.935	800.828	837.092	745.615	783.118	551.366	-0.504589	9.48913e-06	Qsox2	quiescin Q6 sulfhydryl oxidase 2 [Source:MGI Symbol;Acc:MGI:2387194]
ENSMUSG00000061132	27.6789	19.6109	14.6774	19.1002	51.425	46.2016	64.4467	66.3823	57.1139	20.2668	-1.49393	9.50734e-06	Blnk	B cell linker [Source:MGI Symbol;Acc:MGI:96878]
ENSMUSG00000027335	32.1075	46.2256	54.516	46.7954	89.7601	95.4833	88.7933	112.613	96.6624	44.9111	-1.09864	9.56569e-06	Adra1d	adrenergic receptor, alpha 1d [Source:MGI Symbol;Acc:MGI:106673]
ENSMUSG00000036412	2.21431	0	10.4838	3.82003	26.18	33.8812	58.0021	23.708	35.4428	4.12955	-3.05234	9.56569e-06	Arsi	arylsulfatase i [Source:MGI Symbol;Acc:MGI:2670959]
ENSMUSG00000069917	57.5721	89.6497	170.887	69.7156	439.45	577.52	240.601	662.638	480.052	96.956	-2.30676	9.62268e-06	Hba-a2	hemoglobin alpha, adult chain 2 [Source:MGI Symbol;Acc:MGI:96016]
ENSMUSG00000021468	865.796	829.259	829.272	813.667	623.645	572.9	658.789	637.744	623.27	834.498	0.421397	9.65766e-06	Sptlc1	serine palmitoyltransferase, long chain base subunit 1 [Source:MGI Symbol;Acc:MGI:1099431]
ENSMUSG00000027177	10367.4	15153.6	15046.4	14402.5	7871.77	7721.06	8633.72	9934.82	8540.34	13742.5	0.686374	9.71301e-06	Hipk3	homeodomain interacting protein kinase 3 [Source:MGI Symbol;Acc:MGI:1314882]
ENSMUSG00000032915	5.53578	2.80155	6.2903	2.86503	28.05	26.1809	20.0501	26.0788	25.0899	4.37316	-2.50225	9.71301e-06	Adgre4	adhesion G protein-coupled receptor E4 [Source:MGI Symbol;Acc:MGI:1196464]
ENSMUSG00000036599	90.7868	78.4435	98.5481	94.5458	154.275	156.315	152.524	151.731	153.711	90.581	-0.756137	9.8109e-06	Chst12	carbohydrate sulfotransferase 12 [Source:MGI Symbol;Acc:MGI:1929064]
ENSMUSG00000025743	1712.77	1112.22	1329.35	1037.14	2632.03	2544.94	2457.57	1795.88	2357.6	1297.87	-0.861489	9.8109e-06	Sdc3	syndecan 3 [Source:MGI Symbol;Acc:MGI:1349163]
ENSMUSG00000006731	21.036	19.6109	27.258	25.7852	57.97	60.8321	151.092	65.1969	83.7727	23.4225	-1.83842	9.936e-06	B4galnt1	beta-1,4-N-acetyl-galactosaminyl transferase 1 [Source:MGI Symbol;Acc:MGI:1342057]
ENSMUSG00000061762	95.2154	140.078	127.903	134.656	57.97	46.9716	42.9645	78.2363	56.5356	124.463	1.15683	1.00577e-05	Tac1	tachykinin 1 [Source:MGI Symbol;Acc:MGI:98474]
ENSMUSG00000009185	1.10716	1.40078	0	0	15.895	12.3204	32.9394	45.0451	26.55	0.626983	-5.55729	1.00577e-05	Ccl8	chemokine (C-C motif) ligand 8 [Source:MGI Symbol;Acc:MGI:101878]
ENSMUSG00000005846	2033.84	2511.59	2364.11	2306.35	1749.39	1613.21	1779.45	1618.07	1690.03	2303.97	0.446201	1.00962e-05	Rsl1d1	ribosomal L1 domain containing 1 [Source:MGI Symbol;Acc:MGI:1913659]
ENSMUSG00000072294	540.292	591.127	632.175	789.792	337.535	387.323	293.591	444.524	365.743	638.347	0.808007	1.02993e-05	Klf12	Kruppel-like factor 12 [Source:MGI Symbol;Acc:MGI:1333796]
ENSMUSG00000034652	57.5721	46.2256	38.7902	44.8854	104.72	77.7727	124.597	107.871	103.74	46.8683	-1.14757	1.03264e-05	Cd300a	CD300A molecule [Source:MGI Symbol;Acc:MGI:2443411]
ENSMUSG00000036390	504.863	818.053	794.675	667.551	323.51	367.303	277.121	470.603	359.634	696.285	0.955796	1.03315e-05	Gadd45a	growth arrest and DNA-damage-inducible 45 alpha [Source:MGI Symbol;Acc:MGI:107799]
ENSMUSG00000035597	1252.19	1379.76	1389.11	1578.63	887.316	896.311	1070.53	1017.07	967.808	1399.92	0.533127	1.03315e-05	Prpf39	pre-mRNA processing factor 39 [Source:MGI Symbol;Acc:MGI:104602]
ENSMUSG00000053719	59.7864	130.272	85.9675	68.7606	37.4	10.0103	22.1983	24.8934	23.6255	86.1967	1.87391	1.03319e-05	Klk1b26	kallikrein 1-related petidase b26 [Source:MGI Symbol;Acc:MGI:891981]
ENSMUSG00000060036	7026.01	7106.14	6596.43	7973.36	4246.77	4337.56	5692.08	5061.65	4834.52	7175.49	0.569704	1.03319e-05	Rpl3	ribosomal protein L3 [Source:MGI Symbol;Acc:MGI:1351605]
ENSMUSG00000020076	2003.95	2329.49	2236.2	2190.79	1536.21	1528.5	1726.46	1724.75	1628.98	2190.11	0.426989	1.03319e-05	Ddx50	DEAD (Asp-Glu-Ala-Asp) box polypeptide 50 [Source:MGI Symbol;Acc:MGI:2182303]
ENSMUSG00000087684	176.038	326.381	162.5	170.946	9.35001	6.16021	45.8288	5.92699	16.8165	208.966	3.61779	1.03368e-05	1200007C13Rik	RIKEN cDNA 1200007C13 gene [Source:MGI Symbol;Acc:MGI:1921369]
ENSMUSG00000043733	15665.1	17320.6	17852.9	18166.2	13738.9	12532.2	13211.6	11226.9	12677.4	17251.2	0.444333	1.03368e-05	Ptpn11	protein tyrosine phosphatase, non-receptor type 11 [Source:MGI Symbol;Acc:MGI:99511]
ENSMUSG00000030541	84338.7	98034.7	93968.7	85038.7	69546.3	70442.8	69778.6	61752.1	67880	90345.2	0.412416	1.03763e-05	Idh2	isocitrate dehydrogenase 2 (NADP+), mitochondrial [Source:MGI Symbol;Acc:MGI:96414]
ENSMUSG00000091649	17.7145	8.40466	15.7258	10.5051	31.79	43.1215	51.5574	55.7137	45.5457	13.0875	-1.78414	1.0416e-05	Phf11b	PHD finger protein 11B [Source:MGI Symbol;Acc:MGI:3645789]
ENSMUSG00000041592	202.609	112.062	156.209	111.736	68.255	66.9923	70.8914	50.9721	64.2777	145.654	1.17426	1.04454e-05	Sdk2	sidekick cell adhesion molecule 2 [Source:MGI Symbol;Acc:MGI:2443847]
ENSMUSG00000020131	94.1082	53.2295	46.1289	86.9058	181.39	262.579	166.129	128.023	184.53	70.0931	-1.39462	1.06401e-05	Pcsk4	proprotein convertase subtilisin/kexin type 4 [Source:MGI Symbol;Acc:MGI:97514]
ENSMUSG00000010517	2741.32	3363.26	3273.05	3083.72	2359.94	2291.6	2389.54	2280.71	2330.45	3115.34	0.418244	1.06439e-05	Faf1	Fas-associated factor 1 [Source:MGI Symbol;Acc:MGI:109419]
ENSMUSG00000070697	1111.58	1350.35	1210.88	1279.71	848.045	862.43	957.392	925.796	898.416	1238.13	0.461921	1.07532e-05	Utp3	UTP3 small subunit processome component [Source:MGI Symbol;Acc:MGI:1919230]
ENSMUSG00000026313	2002.84	2115.17	1703.62	2261.46	1232.33	1514.64	1155.03	941.206	1210.8	2020.77	0.73773	1.08506e-05	Hdac4	histone deacetylase 4 [Source:MGI Symbol;Acc:MGI:3036234]
ENSMUSG00000021585	6387.18	7260.22	6949.74	7039.37	5421.13	5378.64	5723.59	5264.35	5446.93	6909.13	0.342687	1.08775e-05	Cast	calpastatin [Source:MGI Symbol;Acc:MGI:1098236]
ENSMUSG00000017299	593.435	614.941	627.982	667.551	477.785	373.463	456.856	411.333	429.859	625.977	0.542856	1.08828e-05	Dnttip1	deoxynucleotidyltransferase, terminal, interacting protein 1 [Source:MGI Symbol;Acc:MGI:1923483]
ENSMUSG00000038422	4.42862	25.214	14.6774	14.3251	54.23	46.2016	47.977	72.3093	55.1795	14.6613	-1.93228	1.09383e-05	Hdhd3	haloacid dehalogenase-like hydrolase domain containing 3 [Source:MGI Symbol;Acc:MGI:1919998]
ENSMUSG00000027086	676.472	724.201	710.804	672.326	968.661	962.533	907.983	860.599	924.944	695.951	-0.412651	1.0944e-05	Fastkd1	FAST kinase domains 1 [Source:MGI Symbol;Acc:MGI:2444596]
ENSMUSG00000105509	76.3937	50.4279	60.8063	67.8056	30.855	16.1706	26.4948	24.8934	24.6034	63.8584	1.38876	1.0999e-05	C130013H08Rik	RIKEN cDNA C130013H08 gene [Source:MGI Symbol;Acc:MGI:3697343]
ENSMUSG00000028820	2917.36	4929.33	4227.08	5199.07	2061.68	2199.2	2427.49	2830.73	2379.77	4318.21	0.859858	1.0999e-05	Sfpq	splicing factor proline/glutamine rich (polypyrimidine tract binding protein associated) [Source:MGI Symbol;Acc:MGI:1918764]
ENSMUSG00000031736	173.823	217.12	219.112	220.607	118.745	121.664	123.881	141.062	126.338	207.666	0.721872	1.10566e-05	Crnde	colorectal neoplasia differentially expressed (non-protein coding) [Source:MGI Symbol;Acc:MGI:1918546]
ENSMUSG00000021000	1987.34	2031.13	2078.95	2098.15	2589.95	2919.17	2479.05	2693.22	2670.35	2048.89	-0.381918	1.11133e-05	Mia2	melanoma inhibitory activity 2 [Source:MGI Symbol;Acc:MGI:2159614]
ENSMUSG00000021595	2009.49	2298.67	2094.67	2111.52	1468.89	1483.84	1762.98	1490.05	1551.44	2128.59	0.454863	1.1166e-05	Nsun2	NOL1/NOP2/Sun domain family member 2 [Source:MGI Symbol;Acc:MGI:107252]
ENSMUSG00000041268	2040.49	4265.36	4389.58	3206.92	1555.84	1228.96	1359.83	2143.2	1571.96	3475.59	1.14525	1.11722e-05	Dmxl2	Dmx-like 2 [Source:MGI Symbol;Acc:MGI:2444630]
ENSMUSG00000003379	6.64293	1.40078	1.04838	0.955008	14.025	26.9509	24.3465	36.7473	25.5175	2.51178	-3.34512	1.1336e-05	Cd79a	CD79A antigen (immunoglobulin-associated alpha) [Source:MGI Symbol;Acc:MGI:101774]
ENSMUSG00000028015	761.723	734.007	710.804	759.232	558.195	569.82	544.217	580.845	563.269	741.441	0.398112	1.13967e-05	Ctso	cathepsin O [Source:MGI Symbol;Acc:MGI:2139628]
ENSMUSG00000042207	425.148	361.4	374.273	389.643	656.37	590.61	612.96	486.013	586.489	387.616	-0.598724	1.14377e-05	Kdm5b	lysine (K)-specific demethylase 5B [Source:MGI Symbol;Acc:MGI:1922855]
ENSMUSG00000072235	793.831	910.504	998.061	893.888	1292.17	1245.13	1296.1	1154.58	1246.99	899.071	-0.472738	1.15433e-05	Tuba1a	tubulin, alpha 1A [Source:MGI Symbol;Acc:MGI:98869]
ENSMUSG00000025610	16.6073	16.8093	13.629	7.64007	57.97	56.982	41.5323	32.0058	47.1225	13.6714	-1.81339	1.15772e-05	Map3k7cl	Map3k7 C-terminal like [Source:MGI Symbol;Acc:MGI:2446584]
ENSMUSG00000000134	437.326	374.007	381.612	382.958	589.05	572.13	629.43	503.794	573.601	393.976	-0.544167	1.17818e-05	Tfe3	transcription factor E3 [Source:MGI Symbol;Acc:MGI:98511]
ENSMUSG00000008318	54.2506	71.4396	48.2257	48.7054	118.745	90.8632	147.511	119.725	119.211	55.6553	-1.11203	1.18227e-05	Relt	RELT tumor necrosis factor receptor [Source:MGI Symbol;Acc:MGI:2443373]
ENSMUSG00000044827	4.42862	7.00388	2.09677	7.64007	14.96	27.721	80.2004	43.8597	41.6853	5.29233	-2.98942	1.18227e-05	Tlr1	toll-like receptor 1 [Source:MGI Symbol;Acc:MGI:1341295]
ENSMUSG00000000142	89.6796	93.852	70.2417	78.3107	139.315	157.085	133.906	162.4	148.177	83.021	-0.839682	1.18817e-05	Axin2	axin 2 [Source:MGI Symbol;Acc:MGI:1270862]
ENSMUSG00000054648	703.044	658.365	608.063	704.796	452.54	470.486	443.25	527.502	473.445	668.567	0.501418	1.18914e-05	Zfp869	zinc finger protein 869 [Source:MGI Symbol;Acc:MGI:1914119]
ENSMUSG00000001053	251.324	253.54	237.983	181.452	482.46	428.905	409.595	310.574	407.884	231.075	-0.825297	1.18979e-05	N4bp3	NEDD4 binding protein 3 [Source:MGI Symbol;Acc:MGI:2442218]
ENSMUSG00000042417	36.5361	33.6186	31.4515	30.5603	6.545	8.47029	12.8893	8.29779	9.05061	33.0416	1.84156	1.19891e-05	Ccno	cyclin O [Source:MGI Symbol;Acc:MGI:2145534]
ENSMUSG00000000787	6362.82	8100.69	7112.24	7840.62	4306.61	4731.04	5227.35	5640.12	4976.28	7354.09	0.563567	1.19891e-05	Ddx3x	DEAD/H (Asp-Glu-Ala-Asp/His) box polypeptide 3, X-linked [Source:MGI Symbol;Acc:MGI:103064]
ENSMUSG00000034083	542.506	574.318	571.369	633.171	439.45	383.473	427.497	366.288	404.177	580.341	0.520738	1.19891e-05	Ccdc174	coiled-coil domain containing 174 [Source:MGI Symbol;Acc:MGI:2444652]
ENSMUSG00000032372	3166.47	2765.13	2791.85	2967.21	1972.85	1789.54	1730.75	1043.15	1634.07	2922.66	0.837957	1.19991e-05	Plscr2	phospholipid scramblase 2 [Source:MGI Symbol;Acc:MGI:1270860]
ENSMUSG00000019487	6521.15	6489.8	5963.21	6790.11	4523.53	5071.4	4166.12	3483.89	4311.23	6441.06	0.578776	1.19991e-05	Trip10	thyroid hormone receptor interactor 10 [Source:MGI Symbol;Acc:MGI:2146901]
ENSMUSG00000002265	1505.73	878.287	1203.54	1589.13	435.71	435.065	417.472	891.419	544.917	1294.17	1.25101	1.20536e-05	Peg3	paternally expressed 3 [Source:MGI Symbol;Acc:MGI:104748]
ENSMUSG00000020257	1069.51	1257.9	1181.53	1266.34	1607.27	1627.84	1558.18	1535.09	1582.09	1193.82	-0.406836	1.22028e-05	Wdr82	WD repeat domain containing 82 [Source:MGI Symbol;Acc:MGI:1924555]
ENSMUSG00000031766	265.717	205.914	171.935	142.296	56.1	40.8114	101.683	20.1518	54.6865	196.466	1.83022	1.23088e-05	Slc12a3	solute carrier family 12, member 3 [Source:MGI Symbol;Acc:MGI:108114]
ENSMUSG00000038967	19614.4	18299.7	17562.5	17385.9	14583.2	14381	13158.6	12067.4	13547.5	18215.6	0.427006	1.23832e-05	Pdk2	pyruvate dehydrogenase kinase, isoenzyme 2 [Source:MGI Symbol;Acc:MGI:1343087]
ENSMUSG00000030357	7498.76	8997.18	8599.89	7829.16	12565.5	12244.2	9942.7	11844.5	11649.2	8231.25	-0.501102	1.23832e-05	Fkbp4	FK506 binding protein 4 [Source:MGI Symbol;Acc:MGI:95543]
ENSMUSG00000109965	33.2147	58.8326	44.0321	27.6952	9.35001	6.93024	2.8643	15.4102	8.63868	40.9437	2.29883	1.24192e-05	Gm45274	predicted gene 45274 [Source:MGI Symbol;Acc:MGI:5791110]
ENSMUSG00000100502	17.7145	26.6147	24.1128	20.0552	4.675	0.770027	5.01252	2.3708	3.20709	22.1243	2.76647	1.24216e-05	Gm28286	predicted gene 28286 [Source:MGI Symbol;Acc:MGI:5578992]
ENSMUSG00000003154	3097.82	2783.34	2786.6	2633.91	2060.74	1597.04	2138.2	1543.39	1834.84	2825.42	0.622076	1.24428e-05	Foxj2	forkhead box J2 [Source:MGI Symbol;Acc:MGI:1926805]
ENSMUSG00000042379	9.9644	9.80543	6.2903	4.77504	32.725	29.261	29.3591	30.8204	30.5414	7.70879	-2.01523	1.2497e-05	Esm1	endothelial cell-specific molecule 1 [Source:MGI Symbol;Acc:MGI:1918940]
ENSMUSG00000074039	23.2503	18.2101	16.7741	21.0102	43.945	56.982	49.4092	61.6407	52.9942	19.8112	-1.41119	1.25124e-05	4930520O04Rik	RIKEN cDNA 4930520O04 gene [Source:MGI Symbol;Acc:MGI:1922366]
ENSMUSG00000034724	1666.27	2433.15	2246.69	2207.02	1354.82	1207.4	1377.73	1537.46	1369.35	2138.28	0.643393	1.25286e-05	Cnot6l	CCR4-NOT transcription complex, subunit 6-like [Source:MGI Symbol;Acc:MGI:2443154]
ENSMUSG00000001034	180.466	182.101	150.967	134.656	341.275	322.641	332.975	211.001	301.973	162.048	-0.906213	1.25948e-05	Mapk7	mitogen-activated protein kinase 7 [Source:MGI Symbol;Acc:MGI:1346347]
ENSMUSG00000061904	63162.1	68860.7	64063.6	62864.4	55204.3	50861.8	51137.8	50611.8	51953.9	64737.7	0.317342	1.27747e-05	Slc25a3	solute carrier family 25 (mitochondrial carrier, phosphate carrier), member 3 [Source:MGI Symbol;Acc:MGI:1353498]
ENSMUSG00000023106	1872.2	2290.27	2279.19	2258.59	1613.81	1423.78	1599.71	1632.29	1567.4	2175.06	0.473088	1.28085e-05	Denr	density-regulated protein [Source:MGI Symbol;Acc:MGI:1915434]
ENSMUSG00000006675	502.649	526.692	535.724	574.915	401.115	376.543	344.432	398.294	380.096	534.995	0.497429	1.28372e-05	P4htm	prolyl 4-hydroxylase, transmembrane (endoplasmic reticulum) [Source:MGI Symbol;Acc:MGI:1921693]
ENSMUSG00000020810	1464.77	1220.08	1472.98	1308.36	1732.56	2215.37	1894.73	2221.44	2016.02	1366.55	-0.560071	1.28882e-05	Cygb	cytoglobin [Source:MGI Symbol;Acc:MGI:2149481]
ENSMUSG00000047749	53.1435	63.0349	54.516	43.9304	115.94	111.654	86.6451	119.725	108.491	53.6562	-1.02022	1.29973e-05	Zc3hav1l	zinc finger CCCH-type, antiviral 1-like [Source:MGI Symbol;Acc:MGI:2443387]
ENSMUSG00000029627	391.933	354.396	332.338	359.083	274.89	210.217	215.539	229.967	232.653	359.438	0.630364	1.30357e-05	Zkscan14	zinc finger with KRAB and SCAN domains 14 [Source:MGI Symbol;Acc:MGI:1914485]
ENSMUSG00000040102	217.002	203.113	170.887	204.372	322.575	343.432	275.689	307.018	312.179	198.843	-0.651291	1.30398e-05	Klhl42	kelch-like 42 [Source:MGI Symbol;Acc:MGI:2444786]
ENSMUSG00000050578	0	0	1.04838	0	13.09	10.7804	29.3591	15.4102	17.1599	0.262096	-5.67115	1.31212e-05	Mmp13	matrix metallopeptidase 13 [Source:MGI Symbol;Acc:MGI:1340026]
ENSMUSG00000020653	376.433	418.832	355.402	368.633	786.335	730.755	655.925	461.12	658.534	379.825	-0.797252	1.31387e-05	Klf11	Kruppel-like factor 11 [Source:MGI Symbol;Acc:MGI:2653368]
ENSMUSG00000070423	89.6796	53.2295	69.1933	41.0654	208.505	181.726	170.426	99.5734	165.058	63.2919	-1.38687	1.31387e-05	Olfr558	olfactory receptor 558 [Source:MGI Symbol;Acc:MGI:3030392]
ENSMUSG00000032386	996.44	972.139	967.658	940.683	749.87	746.156	754.743	778.807	757.394	969.23	0.356295	1.31389e-05	Trip4	thyroid hormone receptor interactor 4 [Source:MGI Symbol;Acc:MGI:1928469]
ENSMUSG00000027285	817.081	949.726	1005.4	871.923	603.075	569.05	631.578	711.239	628.736	911.032	0.536867	1.32142e-05	Haus2	HAUS augmin-like complex, subunit 2 [Source:MGI Symbol;Acc:MGI:1913546]
ENSMUSG00000029229	704.151	741.01	678.304	782.152	513.315	452.006	528.463	559.508	513.323	726.404	0.503357	1.32562e-05	Chic2	cysteine-rich hydrophobic domain 2 [Source:MGI Symbol;Acc:MGI:1921527]
ENSMUSG00000046743	325.504	186.303	186.612	181.452	466.565	469.716	467.597	349.692	438.393	219.968	-0.996248	1.3297e-05	Fat4	FAT atypical cadherin 4 [Source:MGI Symbol;Acc:MGI:3045256]
ENSMUSG00000024835	1290.94	1159.84	1228.71	1167.02	1499.74	1573.93	1619.76	1543.39	1559.21	1211.63	-0.364043	1.33204e-05	Coro1b	coronin, actin binding protein 1B [Source:MGI Symbol;Acc:MGI:1345963]
ENSMUSG00000026193	937.761	582.723	821.933	621.71	1736.3	2019.78	4668.09	2041.26	2616.36	741.032	-1.81999	1.33891e-05	Fn1	fibronectin 1 [Source:MGI Symbol;Acc:MGI:95566]
ENSMUSG00000028970	636.614	456.653	603.869	770.692	272.085	289.53	333.691	425.558	330.216	616.957	0.906588	1.35521e-05	Abcb1b	ATP-binding cassette, sub-family B (MDR/TAP), member 1B [Source:MGI Symbol;Acc:MGI:97568]
ENSMUSG00000014956	15326.4	20195	19212.7	18984.6	12770.2	11752.9	12867.9	14133.5	12881.1	18429.7	0.516832	1.35845e-05	Ppp1cb	protein phosphatase 1 catalytic subunit beta [Source:MGI Symbol;Acc:MGI:104871]
ENSMUSG00000049562	55.3578	51.8287	64.9998	63.9856	113.135	117.044	128.177	94.8319	113.297	59.043	-0.940179	1.37175e-05	Ap5b1	adaptor-related protein complex 5, beta 1 subunit [Source:MGI Symbol;Acc:MGI:2685808]
ENSMUSG00000036959	169.395	165.292	158.306	138.476	240.295	256.419	251.342	227.596	243.913	157.867	-0.634819	1.3813e-05	Bcorl1	BCL6 co-repressor-like 1 [Source:MGI Symbol;Acc:MGI:2443910]
ENSMUSG00000027350	47.6077	21.0116	32.4999	48.7054	3.74	13.8605	5.7286	5.92699	7.31402	37.4562	2.33964	1.38876e-05	Chgb	chromogranin B [Source:MGI Symbol;Acc:MGI:88395]
ENSMUSG00000028822	2840.96	2595.64	2596.85	2735.14	2183.23	1994.37	2053.7	1761.5	1998.2	2692.15	0.429416	1.39359e-05	Tmem50a	transmembrane protein 50A [Source:MGI Symbol;Acc:MGI:1919067]
ENSMUSG00000005672	75.2866	36.4202	51.3708	23.8752	162.69	150.925	144.647	91.2757	137.385	46.7382	-1.5594	1.39365e-05	Kit	KIT proto-oncogene receptor tyrosine kinase [Source:MGI Symbol;Acc:MGI:96677]
ENSMUSG00000028917	8731.03	7812.13	7464.49	8104.2	6332.76	5674.33	5750.08	4684.69	5610.47	8027.96	0.51665	1.39932e-05	Plekhm2	pleckstrin homology domain containing, family M (with RUN domain) member 2 [Source:MGI Symbol;Acc:MGI:1916832]
ENSMUSG00000087404	81.9295	50.4279	118.467	92.6358	24.31	43.1215	25.7787	21.3372	28.6368	85.8652	1.57753	1.4049e-05	Gm11752	predicted gene 11752 [Source:MGI Symbol;Acc:MGI:3651700]
ENSMUSG00000022440	182.681	142.879	208.628	144.206	284.24	308.781	348.012	254.861	298.973	169.599	-0.819052	1.4177e-05	C1qtnf6	C1q and tumor necrosis factor related protein 6 [Source:MGI Symbol;Acc:MGI:1919959]
ENSMUSG00000050530	606.721	504.279	478.063	445.034	749.87	781.577	764.052	702.941	749.61	508.524	-0.561937	1.4416e-05	Fam171a1	family with sequence similarity 171, member A1 [Source:MGI Symbol;Acc:MGI:2442917]
ENSMUSG00000083649	172.716	198.91	174.032	165.216	110.33	77.7727	98.8183	116.169	100.773	177.719	0.824579	1.4669e-05	Rasl2-9	RAS-like, family 2, locus 9 [Source:MGI Symbol;Acc:MGI:104605]
ENSMUSG00000006386	1602.05	1330.74	1477.17	1398.13	2020.54	1879.64	1868.96	1944.05	1928.3	1452.02	-0.408217	1.47081e-05	Tek	TEK receptor tyrosine kinase [Source:MGI Symbol;Acc:MGI:98664]
ENSMUSG00000004054	937.761	763.423	716.046	801.252	1276.28	1178.14	1288.22	1034.85	1194.37	804.62	-0.570731	1.47586e-05	Map3k11	mitogen-activated protein kinase kinase kinase 11 [Source:MGI Symbol;Acc:MGI:1346880]
ENSMUSG00000024378	155.002	166.692	181.37	164.261	252.45	253.339	269.96	361.546	284.324	166.831	-0.763483	1.48239e-05	Stard4	StAR-related lipid transfer (START) domain containing 4 [Source:MGI Symbol;Acc:MGI:2156764]
ENSMUSG00000092341	30047.1	41009.1	41349.3	50963.1	20918.8	24134.9	24356.6	27930.4	24335.2	40842.1	0.747055	1.48366e-05	Malat1	metastasis associated lung adenocarcinoma transcript 1 (non-coding RNA) [Source:MGI Symbol;Acc:MGI:1919539]
ENSMUSG00000097577	181.574	142.879	155.161	152.801	83.215	77.0027	101.683	97.2027	89.7758	158.104	0.819864	1.48445e-05	6230400D17Rik	RIKEN cDNA 6230400D17 gene [Source:MGI Symbol;Acc:MGI:1923383]
ENSMUSG00000029136	156.109	166.692	132.096	136.566	81.345	70.8425	85.929	94.8319	83.2371	147.866	0.831149	1.48649e-05	Rbks	ribokinase [Source:MGI Symbol;Acc:MGI:1918586]
ENSMUSG00000056076	4807.27	5184.27	5046.92	4827.57	3835.37	3728.47	4171.85	3479.14	3803.71	4966.51	0.384022	1.49048e-05	Eif3b	eukaryotic translation initiation factor 3, subunit B [Source:MGI Symbol;Acc:MGI:106478]
ENSMUSG00000046245	1.10716	1.40078	2.09677	6.68506	22.44	16.1706	40.1002	24.8934	25.901	2.82244	-3.13154	1.4914e-05	Pilra	paired immunoglobin-like type 2 receptor alpha [Source:MGI Symbol;Acc:MGI:2450529]
ENSMUSG00000016128	2594.07	2746.92	2518.22	2322.58	1978.46	1607.05	1662.73	1269.56	1629.45	2545.45	0.642487	1.49347e-05	Stard13	StAR-related lipid transfer (START) domain containing 13 [Source:MGI Symbol;Acc:MGI:2385331]
ENSMUSG00000021236	3896.08	4374.62	4369.66	3985.25	5191.12	6955.65	5623.34	7233.3	6250.85	4156.4	-0.588657	1.50468e-05	Entpd5	ectonucleoside triphosphate diphosphohydrolase 5 [Source:MGI Symbol;Acc:MGI:1321385]
ENSMUSG00000019254	4888.09	4167.31	4235.47	4640.39	3385.64	3015.42	3376.29	2560.46	3084.45	4482.81	0.538965	1.50684e-05	Ppp1r12c	protein phosphatase 1, regulatory subunit 12C [Source:MGI Symbol;Acc:MGI:1924258]
ENSMUSG00000027130	995.333	962.333	904.755	970.288	1390.35	1192	1317.58	1218.59	1279.63	958.177	-0.417762	1.5381e-05	Slc12a6	solute carrier family 12, member 6 [Source:MGI Symbol;Acc:MGI:2135960]
ENSMUSG00000100017	263.503	238.132	209.677	291.278	121.55	132.445	126.745	181.366	140.526	250.647	0.844764	1.5405e-05	2410022M11Rik	RIKEN cDNA 2410022M11 gene [Source:MGI Symbol;Acc:MGI:1917005]
ENSMUSG00000025823	655.436	701.789	468.628	492.784	995.776	931.732	1769.42	1059.75	1189.17	579.659	-1.03867	1.54396e-05	Pdia4	protein disulfide isomerase associated 4 [Source:MGI Symbol;Acc:MGI:104864]
ENSMUSG00000027620	6360.61	7856.95	7681.51	7751.8	5566.99	4970.52	5180.8	5772.89	5372.8	7412.72	0.464573	1.5568e-05	Rbm39	RNA binding motif protein 39 [Source:MGI Symbol;Acc:MGI:2157953]
ENSMUSG00000066319	26.5717	25.214	17.8225	14.3251	60.775	71.6125	58.0021	42.6743	58.266	20.9833	-1.49952	1.55859e-05	Rtp3	receptor transporter protein 3 [Source:MGI Symbol;Acc:MGI:2446841]
ENSMUSG00000041577	963.225	635.952	782.094	724.851	1617.55	1727.17	1015.39	1333.57	1423.42	776.531	-0.873529	1.55887e-05	Prelp	proline arginine-rich end leucine-rich repeat [Source:MGI Symbol;Acc:MGI:2151110]
ENSMUSG00000029012	404.112	448.248	502.176	484.189	312.29	295.69	340.852	304.647	313.37	459.681	0.552579	1.56339e-05	Orc5	origin recognition complex, subunit 5 [Source:MGI Symbol;Acc:MGI:1347044]
ENSMUSG00000006699	3571.68	3650.42	3783.62	3369.27	4519.79	4418.41	4960.97	4509.25	4602.11	3593.75	-0.357246	1.5685e-05	Cdc42	cell division cycle 42 [Source:MGI Symbol;Acc:MGI:106211]
ENSMUSG00000054920	502.649	434.241	419.354	380.093	621.775	626.802	654.493	600.997	626.017	434.084	-0.53074	1.5685e-05	Klhl5	kelch-like 5 [Source:MGI Symbol;Acc:MGI:1919028]
ENSMUSG00000027878	719.651	502.879	566.127	534.805	981.751	973.314	819.906	854.672	907.411	580.865	-0.642801	1.57445e-05	Notch2	notch 2 [Source:MGI Symbol;Acc:MGI:97364]
ENSMUSG00000017144	300.039	352.996	356.451	356.218	519.86	490.507	454.708	584.401	512.369	341.426	-0.582101	1.57525e-05	Rnd3	Rho family GTPase 3 [Source:MGI Symbol;Acc:MGI:1921444]
ENSMUSG00000030313	885.724	1067.39	1055.72	959.783	754.545	711.505	724.668	724.278	728.749	992.155	0.444347	1.57534e-05	Dennd5b	DENN/MADD domain containing 5B [Source:MGI Symbol;Acc:MGI:2444273]
ENSMUSG00000002984	2161.17	2405.13	2313.78	2252.86	1847.56	1838.82	1825.28	1736.61	1812.07	2283.24	0.332257	1.57792e-05	Tomm40	translocase of outer mitochondrial membrane 40 [Source:MGI Symbol;Acc:MGI:1858259]
ENSMUSG00000037012	8768.67	8132.91	8307.39	7651.53	6560.9	5998.51	6403.86	5333.11	6074.09	8215.12	0.435271	1.58976e-05	Hk1	hexokinase 1 [Source:MGI Symbol;Acc:MGI:96103]
ENSMUSG00000106981	44.2862	74.2411	73.3869	58.2555	126.225	160.936	103.831	143.433	133.606	62.5424	-1.09843	1.59069e-05	Gm45495	predicted gene 45495 [Source:MGI Symbol;Acc:MGI:5791331]
ENSMUSG00000029185	317.754	221.323	285.16	220.607	406.725	548.259	410.311	697.014	515.577	261.211	-0.97791	1.5907e-05	Fam114a1	family with sequence similarity 114, member A1 [Source:MGI Symbol;Acc:MGI:1915553]
ENSMUSG00000057337	205.931	208.716	178.225	168.081	103.785	112.424	112.424	64.0115	98.1611	190.238	0.938823	1.60364e-05	Chst3	carbohydrate (chondroitin 6/keratan) sulfotransferase 3 [Source:MGI Symbol;Acc:MGI:1858224]
ENSMUSG00000035093	1809.09	1825.21	1948.95	1841.26	1437.1	1554.68	1439.31	1422.48	1463.39	1856.13	0.342558	1.60444e-05	Secisbp2l	SECIS binding protein 2-like [Source:MGI Symbol;Acc:MGI:1917604]
ENSMUSG00000027490	6.64293	8.40466	9.43545	12.4151	27.115	39.2714	58.0021	29.635	38.5059	9.22454	-2.05992	1.609e-05	E2f1	E2F transcription factor 1 [Source:MGI Symbol;Acc:MGI:101941]
ENSMUSG00000025142	1257.73	1242.49	1149.03	1276.85	753.61	766.177	1002.5	674.492	799.196	1231.52	0.621362	1.61464e-05	Aspscr1	alveolar soft part sarcoma chromosome region, candidate 1 (human) [Source:MGI Symbol;Acc:MGI:1916188]
ENSMUSG00000063800	536.97	526.692	523.144	676.146	332.86	377.313	384.532	400.665	373.843	565.738	0.600238	1.64132e-05	Prpf38a	PRP38 pre-mRNA processing factor 38 (yeast) domain containing A [Source:MGI Symbol;Acc:MGI:1916962]
ENSMUSG00000085743	19.9288	8.40466	18.8709	27.6952	0	2.31008	1.43215	2.3708	1.52826	18.7249	3.63947	1.64338e-05	8430419K02Rik	RIKEN cDNA 8430419K02 gene [Source:MGI Symbol;Acc:MGI:1921768]
ENSMUSG00000059588	348.754	523.89	500.079	373.408	715.275	693.024	694.593	944.762	761.914	436.533	-0.803981	1.6454e-05	Calcrl	calcitonin receptor-like [Source:MGI Symbol;Acc:MGI:1926944]
ENSMUSG00000018800	420.719	642.956	615.401	509.019	249.645	251.029	285.714	392.367	294.689	547.024	0.895388	1.6456e-05	Abca5	ATP-binding cassette, sub-family A (ABC1), member 5 [Source:MGI Symbol;Acc:MGI:2386607]
ENSMUSG00000020777	17013.7	18040.6	17244.9	17676.2	13042.3	13413.9	14193.3	11038.4	12922	17493.8	0.436772	1.64833e-05	Acox1	acyl-Coenzyme A oxidase 1, palmitoyl [Source:MGI Symbol;Acc:MGI:1330812]
ENSMUSG00000033788	1865.56	1473.62	1651.2	1524.19	2870.45	2562.65	2789.11	1980.8	2550.75	1628.64	-0.647647	1.65407e-05	Dysf	dysferlin [Source:MGI Symbol;Acc:MGI:1349385]
ENSMUSG00000028396	2387.03	2751.12	2508.78	2536.5	1715.73	1575.47	1965.63	1992.65	1812.37	2545.86	0.490467	1.65422e-05	2310002L09Rik	RIKEN cDNA 2310002L09 gene [Source:MGI Symbol;Acc:MGI:1916780]
ENSMUSG00000058638	1602.05	1375.56	1360.8	1650.25	1068.71	1091.13	1145	1036.04	1085.22	1497.17	0.464271	1.67375e-05	Zfp110	zinc finger protein 110 [Source:MGI Symbol;Acc:MGI:1890378]
ENSMUSG00000031504	294.503	238.132	330.241	294.143	398.31	452.776	594.342	513.277	489.676	289.255	-0.757181	1.68291e-05	Rab20	RAB20, member RAS oncogene family [Source:MGI Symbol;Acc:MGI:102789]
ENSMUSG00000043252	931.118	1064.59	1006.45	872.878	1286.56	1366.8	1269.6	1525.61	1362.14	968.758	-0.491979	1.68674e-05	Tmem64	transmembrane protein 64 [Source:MGI Symbol;Acc:MGI:2140359]
ENSMUSG00000051413	190.431	126.07	159.354	145.161	304.81	285.68	291.443	215.742	274.419	155.254	-0.821998	1.6966e-05	Plagl2	pleiomorphic adenoma gene-like 2 [Source:MGI Symbol;Acc:MGI:1933165]
ENSMUSG00000022808	1506.84	1783.19	1746.61	1674.13	1249.16	1205.86	1301.11	1312.24	1267.09	1677.69	0.404896	1.69713e-05	Snx4	sorting nexin 4 [Source:MGI Symbol;Acc:MGI:1916400]
ENSMUSG00000044768	78.608	85.4473	73.3869	80.2207	132.77	137.065	196.921	137.506	151.065	79.4157	-0.935728	1.70076e-05	D1Ertd622e	DNA segment, Chr 1, ERATO Doi 622, expressed [Source:MGI Symbol;Acc:MGI:1277184]
ENSMUSG00000048833	651.007	621.945	685.643	690.471	838.695	881.681	875.044	872.453	866.968	662.267	-0.386681	1.70707e-05	Slc39a9	solute carrier family 39 (zinc transporter), member 9 [Source:MGI Symbol;Acc:MGI:1914820]
ENSMUSG00000085998	31.0004	28.0155	12.5806	26.7402	3.74	6.16021	2.8643	3.55619	4.08018	24.5842	2.57656	1.708e-05	AW822252	expressed sequence AW822252 [Source:MGI Symbol;Acc:MGI:2148030]
ENSMUSG00000020333	779.438	791.438	682.498	736.311	528.275	473.566	408.879	571.362	495.521	747.421	0.596227	1.72706e-05	Acsl6	acyl-CoA synthetase long-chain family member 6 [Source:MGI Symbol;Acc:MGI:894291]
ENSMUSG00000073421	395.255	452.451	363.789	125.106	1255.71	1038	1312.57	1139.17	1186.36	334.15	-1.82948	1.72706e-05	H2-Ab1	histocompatibility 2, class II antigen A, beta 1 [Source:MGI Symbol;Acc:MGI:103070]
ENSMUSG00000054000	43.1791	29.4163	38.7902	46.7954	83.215	74.6926	103.831	85.3487	86.7718	39.5452	-1.12197	1.72977e-05	Tusc1	tumor suppressor candidate 1 [Source:MGI Symbol;Acc:MGI:2684283]
ENSMUSG00000018217	1231.16	1147.24	1209.84	1023.77	1764.35	1707.15	1465.81	1529.16	1616.62	1153	-0.48803	1.74161e-05	Pmp22	peripheral myelin protein 22 [Source:MGI Symbol;Acc:MGI:97631]
ENSMUSG00000027799	927.796	1049.18	1171.04	1065.79	615.23	759.246	701.037	795.402	717.729	1053.45	0.554714	1.7573e-05	Nbea	neurobeachin [Source:MGI Symbol;Acc:MGI:1347075]
ENSMUSG00000046691	1088.33	1092.61	1015.88	1096.35	1474.5	1302.12	1450.77	1367.95	1398.83	1073.29	-0.38253	1.7573e-05	Chtf8	CTF8, chromosome transmission fidelity factor 8 [Source:MGI Symbol;Acc:MGI:2443370]
ENSMUSG00000017428	3460.97	3685.44	3560.31	3736.95	2716.18	2504.13	3027.57	2424.14	2668	3610.92	0.435874	1.78812e-05	Psmd11	proteasome (prosome, macropain) 26S subunit, non-ATPase, 11 [Source:MGI Symbol;Acc:MGI:1916327]
ENSMUSG00000003234	2266.35	2578.83	2399.75	2632.96	1864.39	1900.43	1991.4	1806.55	1890.69	2469.47	0.384465	1.79048e-05	Abcf3	ATP-binding cassette, sub-family F (GCN20), member 3 [Source:MGI Symbol;Acc:MGI:1351656]
ENSMUSG00000046556	407.433	275.953	330.241	325.658	579.7	529.778	554.958	462.305	531.686	334.821	-0.666272	1.8051e-05	Zfp319	zinc finger protein 319 [Source:MGI Symbol;Acc:MGI:1890618]
ENSMUSG00000057236	3206.32	3585.99	3388.38	3618.53	2463.73	2551.87	2606.51	2881.7	2625.95	3449.8	0.39423	1.80995e-05	Rbbp4	retinoblastoma binding protein 4, chromatin remodeling factor [Source:MGI Symbol;Acc:MGI:1194912]
ENSMUSG00000049401	1536.73	1704.74	1571.53	1492.68	1248.23	1236.66	1198.71	1232.81	1229.1	1576.42	0.357981	1.81063e-05	Ogfr	opioid growth factor receptor [Source:MGI Symbol;Acc:MGI:1919325]
ENSMUSG00000097828	36.5361	22.4124	31.4515	33.4253	90.6951	72.3825	61.5824	68.7531	73.3533	30.9563	-1.22906	1.81063e-05	6430562O15Rik	RIKEN cDNA 6430562O15 gene [Source:MGI Symbol;Acc:MGI:2444982]
ENSMUSG00000022231	381.969	375.408	377.418	370.543	227.205	259.499	277.837	276.198	260.185	376.335	0.532215	1.81518e-05	Sema5a	sema domain, seven thrombospondin repeats (type 1 and type 1-like), transmembrane domain (TM) and short cytoplasmic domain, (semaphorin) 5A [Source:MGI Symbol;Acc:MGI:107556]
ENSMUSG00000022313	106.287	89.6497	116.371	115.556	168.3	176.336	186.896	175.439	176.743	106.966	-0.71759	1.82459e-05	Utp23	UTP23 small subunit processome component [Source:MGI Symbol;Acc:MGI:1925831]
ENSMUSG00000053950	561.328	579.921	573.466	645.586	415.14	428.135	456.856	399.479	424.903	590.075	0.472072	1.8249e-05	Adnp2	ADNP homeobox 2 [Source:MGI Symbol;Acc:MGI:2448562]
ENSMUSG00000022297	748.437	672.372	747.498	816.532	1051.88	1050.32	986.751	958.987	1011.98	746.21	-0.437677	1.82492e-05	Fzd6	frizzled class receptor 6 [Source:MGI Symbol;Acc:MGI:108474]
ENSMUSG00000021508	295.611	378.21	347.015	275.997	476.85	458.166	583.601	629.446	537.016	324.208	-0.729749	1.82554e-05	Cxcl14	chemokine (C-X-C motif) ligand 14 [Source:MGI Symbol;Acc:MGI:1888514]
ENSMUSG00000024769	1650.77	1416.18	1572.58	1481.22	1109.85	1204.32	1193.7	1052.63	1140.12	1530.19	0.423481	1.83237e-05	Cdc42bpg	CDC42 binding protein kinase gamma (DMPK-like) [Source:MGI Symbol;Acc:MGI:2652845]
ENSMUSG00000020547	6153.57	6931.04	6779.9	6195.14	4959.24	4794.96	5260.29	5267.91	5070.6	6514.91	0.361485	1.85411e-05	Bzw2	basic leucine zipper and W2 domains 2 [Source:MGI Symbol;Acc:MGI:1914162]
ENSMUSG00000025825	3920.44	4584.74	4444.1	4564.94	3294.94	3120.92	3008.23	3576.35	3250.11	4378.55	0.430579	1.8548e-05	Iscu	iron-sulfur cluster assembly enzyme [Source:MGI Symbol;Acc:MGI:1913633]
ENSMUSG00000018189	798.259	1056.19	955.078	844.227	613.36	613.711	646.616	659.081	633.192	913.437	0.527322	1.87489e-05	Uchl5	ubiquitin carboxyl-terminal esterase L5 [Source:MGI Symbol;Acc:MGI:1914848]
ENSMUSG00000018507	60.8936	44.8248	47.1773	45.8404	122.485	125.514	213.39	77.0509	134.61	49.684	-1.44444	1.8775e-05	Trpv2	transient receptor potential cation channel, subfamily V, member 2 [Source:MGI Symbol;Acc:MGI:1341836]
ENSMUSG00000098719	3.32147	12.607	12.5806	14.3251	0	0	0	0	0	10.7085	6.04174	1.88076e-05	Mir7212	microRNA 7212 [Source:MGI Symbol;Acc:MGI:5531409]
ENSMUSG00000027469	8.85724	5.6031	10.4838	11.4601	30.855	44.6615	27.9269	35.5619	34.7514	9.10107	-1.90378	1.88663e-05	Tpx2	TPX2, microtubule-associated [Source:MGI Symbol;Acc:MGI:1919369]
ENSMUSG00000005397	3597.15	3387.08	3174.51	2780.98	5618.42	5556.51	4966.7	3940.26	5020.47	3234.93	-0.63462	1.8979e-05	Nid1	nidogen 1 [Source:MGI Symbol;Acc:MGI:97342]
ENSMUSG00000005483	280.11	305.369	240.08	301.783	407.66	431.215	402.434	404.221	411.383	281.836	-0.54811	1.90051e-05	Dnajb1	DnaJ heat shock protein family (Hsp40) member B1 [Source:MGI Symbol;Acc:MGI:1931874]
ENSMUSG00000002486	524.792	511.283	418.305	491.829	347.82	287.99	331.543	239.45	301.701	486.552	0.684903	1.90754e-05	Tchp	trichoplein, keratin filament binding [Source:MGI Symbol;Acc:MGI:1925082]
ENSMUSG00000026657	745.116	647.159	744.353	668.506	984.556	1129.63	985.319	887.863	996.842	701.283	-0.508113	1.91421e-05	Frmd4a	FERM domain containing 4A [Source:MGI Symbol;Acc:MGI:1919850]
ENSMUSG00000042790	1050.69	998.753	1015.88	958.828	803.165	773.107	762.62	685.16	756.013	1006.04	0.410104	1.9203e-05	Rnf214	ring finger protein 214 [Source:MGI Symbol;Acc:MGI:2444451]
ENSMUSG00000030451	4108.65	4030.03	4088.7	4039.69	3090.18	3175.59	3316.14	2650.55	3058.12	4066.77	0.410306	1.92989e-05	Herc2	HECT and RLD domain containing E3 ubiquitin protein ligase 2 [Source:MGI Symbol;Acc:MGI:103234]
ENSMUSG00000084616	25.4646	36.4202	13.629	34.3803	4.675	6.93024	2.14822	0	3.43837	27.4735	2.93247	1.93282e-05	Gm25047	predicted gene, 25047 [Source:MGI Symbol;Acc:MGI:5454824]
ENSMUSG00000021061	9946.69	10599.7	10284.6	9121.28	7453.82	7910.48	7609.73	6371.52	7336.39	9988.07	0.444692	1.93292e-05	Sptb	spectrin beta, erythrocytic [Source:MGI Symbol;Acc:MGI:98387]
ENSMUSG00000075284	509.292	396.42	437.176	317.063	679.745	665.303	771.929	617.592	683.642	414.988	-0.722146	1.93538e-05	Wipf1	WAS/WASL interacting protein family, member 1 [Source:MGI Symbol;Acc:MGI:2178801]
ENSMUSG00000020134	806.009	886.691	719.191	859.508	599.335	581.37	615.824	544.098	585.157	817.85	0.480245	1.95125e-05	Peli1	pellino 1 [Source:MGI Symbol;Acc:MGI:1914495]
ENSMUSG00000024576	8538.38	9621.93	9841.18	10393.4	6433.74	6619.92	7377	7639.89	7017.64	9598.71	0.452034	1.9604e-05	Csnk1a1	casein kinase 1, alpha 1 [Source:MGI Symbol;Acc:MGI:1934950]
ENSMUSG00000039208	188.216	285.758	276.773	254.032	399.245	365.763	485.499	450.451	425.24	251.195	-0.76098	1.96097e-05	Metrnl	meteorin, glial cell differentiation regulator-like [Source:MGI Symbol;Acc:MGI:2384806]
ENSMUSG00000111389	1.10716	1.40078	0	2.86503	27.115	28.491	18.6179	9.48319	20.9268	1.34324	-3.94141	1.96591e-05	Gm39465	predicted gene, 39465 [Source:MGI Symbol;Acc:MGI:5622350]
ENSMUSG00000021114	3106.68	3979.6	3904.18	3990.02	2656.34	2412.49	2619.4	2859.18	2636.85	3745.12	0.506602	1.99205e-05	Atp6v1d	ATPase, H+ transporting, lysosomal V1 subunit D [Source:MGI Symbol;Acc:MGI:1921084]
ENSMUSG00000022103	35.429	23.8132	19.9193	13.3701	54.23	63.9122	66.595	68.7531	63.3726	23.1329	-1.4658	1.99205e-05	Gfra2	glial cell line derived neurotrophic factor family receptor alpha 2 [Source:MGI Symbol;Acc:MGI:1195462]
ENSMUSG00000030064	608.936	497.275	511.611	445.989	766.7	856.27	708.914	750.357	770.56	515.953	-0.579452	2.00084e-05	Frmd4b	FERM domain containing 4B [Source:MGI Symbol;Acc:MGI:2141794]
ENSMUSG00000026785	406.326	320.778	363.789	399.193	739.585	589.84	612.96	484.828	606.803	372.522	-0.703085	2.00203e-05	Pkn3	protein kinase N3 [Source:MGI Symbol;Acc:MGI:2388285]
ENSMUSG00000041215	397.469	302.568	302.983	352.398	488.07	543.639	535.624	474.159	510.373	338.854	-0.590804	2.01741e-05	Yeats2	YEATS domain containing 2 [Source:MGI Symbol;Acc:MGI:2447762]
ENSMUSG00000022477	90650.6	99471.9	97907.5	94628	80093.1	77270.6	73916.1	69053	75083.2	95664.5	0.349464	2.02417e-05	Aco2	aconitase 2, mitochondrial [Source:MGI Symbol;Acc:MGI:87880]
ENSMUSG00000060675	5908.89	7387.69	6624.74	6817.8	4771.31	4607.84	4489.79	5420.83	4822.44	6684.78	0.471378	2.03012e-05	Pla2g16	phospholipase A2, group XVI [Source:MGI Symbol;Acc:MGI:2179715]
ENSMUSG00000038646	1109.37	1173.85	1247.58	1225.28	815.32	816.228	837.092	990.993	864.908	1189.02	0.4619	2.06615e-05	Rammet	RNMT actvating mRNA cap methylating subunit [Source:MGI Symbol;Acc:MGI:1914398]
ENSMUSG00000087370	549.149	449.649	517.902	486.099	695.64	666.843	673.827	725.464	690.443	500.7	-0.460198	2.07503e-05	Tmem170b	transmembrane protein 170B [Source:MGI Symbol;Acc:MGI:3647046]
ENSMUSG00000041144	101.858	112.062	102.742	113.646	36.465	52.3618	32.9394	69.9385	47.9262	107.577	1.18527	2.08802e-05	Dnah7b	dynein, axonemal, heavy chain 7B [Source:MGI Symbol;Acc:MGI:2684953]
ENSMUSG00000018547	938.868	1071.59	1052.58	978.884	1333.31	1319.06	1328.32	1257.71	1309.6	1010.48	-0.375861	2.10265e-05	Pip4k2b	phosphatidylinositol-5-phosphate 4-kinase, type II, beta [Source:MGI Symbol;Acc:MGI:1934234]
ENSMUSG00000029176	1895.45	2368.71	2044.35	2123.94	1462.34	1527.73	1624.06	1603.84	1554.49	2108.11	0.438764	2.10829e-05	Anapc4	anaphase promoting complex subunit 4 [Source:MGI Symbol;Acc:MGI:1098673]
ENSMUSG00000003032	3212.97	3085.91	2631.44	2642.51	2092.53	1369.88	1777.3	1081.08	1580.2	2893.21	0.871827	2.11693e-05	Klf4	Kruppel-like factor 4 (gut) [Source:MGI Symbol;Acc:MGI:1342287]
ENSMUSG00000030980	496.006	418.832	430.886	473.684	679.745	634.502	703.186	579.66	649.273	454.852	-0.513806	2.11693e-05	Knop1	lysine rich nucleolar protein 1 [Source:MGI Symbol;Acc:MGI:1913606]
ENSMUSG00000008845	1067.3	1094.01	983.384	1213.82	1545.56	1741.03	1603.29	1350.17	1560.01	1089.63	-0.518623	2.14502e-05	Cd163	CD163 antigen [Source:MGI Symbol;Acc:MGI:2135946]
ENSMUSG00000021189	350.968	364.202	359.596	382.958	480.59	491.277	517.722	493.126	495.679	364.431	-0.44385	2.14569e-05	Atxn3	ataxin 3 [Source:MGI Symbol;Acc:MGI:1099442]
ENSMUSG00000035437	2048.24	2564.82	2375.64	2362.69	1664.3	1640.93	1720.01	1853.96	1719.8	2337.85	0.443134	2.15185e-05	Rabgap1	RAB GTPase activating protein 1 [Source:MGI Symbol;Acc:MGI:2385139]
ENSMUSG00000110580	765.045	857.275	785.24	749.682	1217.37	1491.54	1099.89	1025.37	1208.54	789.31	-0.61657	2.15244e-05	D830024N08Rik	RIKEN cDNA D830024N08 gene [Source:MGI Symbol;Acc:MGI:2442966]
ENSMUSG00000043587	120.68	75.6419	119.516	84.9957	169.235	188.657	188.328	184.922	182.785	100.208	-0.862236	2.16184e-05	Pxylp1	2-phosphoxylose phosphatase 1 [Source:MGI Symbol;Acc:MGI:2442444]
ENSMUSG00000040359	1565.52	1736.96	1677.41	1703.73	1160.34	1115.77	1352.67	1300.38	1232.29	1670.91	0.439342	2.16889e-05	Ufl1	UFM1 specific ligase 1 [Source:MGI Symbol;Acc:MGI:1914740]
ENSMUSG00000036026	4673.3	4694	4462.97	4701.51	3711.95	3760.81	3862.51	3371.27	3676.64	4632.95	0.332749	2.18496e-05	Tmem63b	transmembrane protein 63b [Source:MGI Symbol;Acc:MGI:2387609]
ENSMUSG00000018809	459.47	479.065	458.144	407.789	343.145	283.37	316.505	308.204	312.806	451.117	0.52701	2.19702e-05	Smyd4	SET and MYND domain containing 4 [Source:MGI Symbol;Acc:MGI:2442796]
ENSMUSG00000030663	1933.09	1959.69	1923.78	2002.65	1515.64	1523.88	1638.38	1602.66	1570.14	1954.8	0.316232	2.20584e-05	1110004F10Rik	RIKEN cDNA 1110004F10 gene [Source:MGI Symbol;Acc:MGI:1929274]
ENSMUSG00000085795	318.861	313.774	279.918	273.132	388.96	482.807	421.768	462.305	438.96	296.421	-0.568802	2.20807e-05	Zfp703	zinc finger protein 703 [Source:MGI Symbol;Acc:MGI:2662729]
ENSMUSG00000026479	513.72	595.33	566.127	473.684	342.21	256.419	393.841	254.861	311.833	537.215	0.780333	2.21378e-05	Lamc2	laminin, gamma 2 [Source:MGI Symbol;Acc:MGI:99913]
ENSMUSG00000005362	1625.3	1989.1	1893.38	1974	1037.85	1032.61	1127.82	1518.5	1179.19	1870.45	0.667112	2.21378e-05	Crbn	cereblon [Source:MGI Symbol;Acc:MGI:1913277]
ENSMUSG00000046186	31.0004	16.8093	29.3547	21.0102	49.555	104.724	75.9039	59.2699	72.3631	24.5437	-1.55832	2.21479e-05	Cd109	CD109 antigen [Source:MGI Symbol;Acc:MGI:2445221]
ENSMUSG00000057054	322.182	287.159	285.16	268.357	202.895	171.716	205.514	160.029	185.038	290.715	0.646446	2.2407e-05	Inca1	inhibitor of CDK, cyclin A1 interacting protein 1 [Source:MGI Symbol;Acc:MGI:2144284]
ENSMUSG00000027680	7236.37	8987.38	8550.62	8182.51	5864.32	5859.13	6176.86	6593.18	6123.38	8239.22	0.428221	2.26441e-05	Fxr1	fragile X mental retardation gene 1, autosomal homolog [Source:MGI Symbol;Acc:MGI:104860]
ENSMUSG00000026890	106.287	86.8481	103.79	64.9406	165.495	204.057	237.737	142.248	187.384	90.4664	-1.0582	2.2647e-05	Lhx6	LIM homeobox protein 6 [Source:MGI Symbol;Acc:MGI:1306803]
ENSMUSG00000058173	296.718	319.377	307.176	253.077	481.525	461.246	378.804	486.013	451.897	294.087	-0.620207	2.26878e-05	Smco4	single-pass membrane protein with coiled-coil domains 4 [Source:MGI Symbol;Acc:MGI:3039636]
ENSMUSG00000028093	771.687	714.396	714.998	761.142	976.141	1018.75	943.071	925.796	965.938	740.556	-0.383275	2.27666e-05	Acp6	acid phosphatase 6, lysophosphatidic [Source:MGI Symbol;Acc:MGI:1931010]
[truncated: 6,400 more rows]
